# Supplementary material for: Identification of distinct pH- and zeaxanthin-dependent quenching in LHCSR3 from Chlamydomonas reinhardtii
Source: eLife journal article supplement (doi:10.7554/elife.60383), 2021-01-15
Supplement: supp [file elife-60383-supp-v1.zip]

Archive with 27 entries (27 files):
- elife_poa_e60383_Transparent_Reporting_File.pdf
- elife_poa_e60383_Figure_1_figure_supplement_1.png
- elife_poa_e60383_Figure_1_figure_supplement_2.png
- elife_poa_e60383_Figure_1_figure_supplement_3.png
- elife_poa_e60383_Figure_1_figure_supplement_4.png
- elife_poa_e60383_Figure_1_figure_supplement_5.pdf
- elife_poa_e60383_Figure_1_figure_supplement_6.png
- elife_poa_e60383_Figure_1_figure_supplement_7.png
- elife_poa_e60383_Figure_1_figure_supplement_8.png
- elife_poa_e60383_Figure_1_figure_supplement_9.png
- elife_poa_e60383_Figure_1_figure_supplement_10.png
- elife_poa_e60383_Figure_2_figure_supplement_1.png
- elife_poa_e60383_Figure_2_figure_supplement_2.pdf
- elife_poa_e60383_Figure_3_figure_supplement_1.pdf
- elife_poa_e60383_Figure_3_figure_supplement_2.png
- elife_poa_e60383_Figure_3_figure_supplement_3.png
- elife_poa_e60383_Figure_3_figure_supplement_4.png
- elife_poa_e60383_Figure_3_figure_supplement_5.png
- elife_poa_e60383_Figure_3_figure_supplement_6.png
- elife_poa_e60383_Figure_1_source_data_1.docx
- elife_poa_e60383_Figure_2_source_data_1.docx
- elife_poa_e60383_Figure_2_source_data_2.xlsx
- elife_poa_e60383_Figure_3_source_data_1.xlsx
- elife_poa_e60383_Figure_3_source_data_2.xlsx
- elife_poa_e60383_Figure_3_source_data_3.xlsx
- elife_poa_e60383_Figure_3_source_data_4.docx
- elife_poa_e60383_Figure_3_source_data_5.xlsx
