# Supplementary material for: Identification of distinct pH- and zeaxanthin-dependent quenching in LHCSR3 from Chlamydomonas reinhardtii
Source: eLife journal article supplement (doi:10.7554/elife.60383), 2021-01-15
Supplement: supp [file elife-60383-supp-v1.zip › elife_poa_e60383_Figure_2_source_data_2.xlsx]

## Sheet: Sheet1
	Total	Chlorophyll a	Chlorophyll b	Chla/Chlab	Neoxanthin	Violoxanthin	Anteraxanthin	Lutein	Zeaxanthin	Total	Chl/car
	Chlorophylls									Carotenoids
WT Viola	7	6.59 ± 0.00	0.41 ± 0.00	16.16 ± 0.16	0.00 ± 0.00	0.98 ± 0.00	0.09 ± 0.03	1.02 ± 0.02	0.08 ± 0.01	2.17 ± 0.02	3.22 ± 0.02
Stop Viola	7	6.38 ± 0.01	0.62 ± 0.01	10.33 ± 0.12	0.00 ± 0.00	0.99 ± 0.01	0.07 ± 0.02	0.95 ± 0.08	0.03 ± 0.04	2.04 ± 0.05	3.43 ± 0.08
WT Zea	7	6.82 ± 0.01	0.18 ± 0.01	37.58 ± 2.82	0.00 ± 0.00	0.27 ± 0.00	0.00 ± 0.00	0.31 ± 0.04	1.41 ± 0.02	1.99 ± 0.03	3.51 ± 0.05
Stop Zea	7	6.81 ± 0.00	0.19 ± 0.00	36.56 ± 0.35	0.00 ± 0.00	0.22 ± 0.00	0.00 ± 0.00	0.44 ± 0.47	1.09 ± 0.02	1.75 ± 0.00	3.99 ± 0.00
