# Supplementary material for: Identification of distinct pH- and zeaxanthin-dependent quenching in LHCSR3 from Chlamydomonas reinhardtii
Source: eLife journal article supplement (doi:10.7554/elife.60383), 2021-01-15
Supplement: supp [file elife-60383-supp-v1.zip › elife_poa_e60383_Figure_3_source_data_1.xlsx]

## Sheet: 4A+ LL
DARK		DARK		60' LIGHT		60' LIGHT
0	0	0	0	0	0	0	0
0.00305	0	0.00305	0	0.00305	0	0.00305	0
0.00611	0	0.00611	0	0.00611	0	0.00611	0
0.00916	0	0.00916	0	0.00916	0	0.00916	0
0.01222	0	0.01222	0	0.01222	0	0.01222	0
0.01527	0	0.01527	0	0.01527	0	0.01527	0
0.01832	0	0.01832	0	0.01832	0	0.01832	0
0.02138	0	0.02138	0	0.02138	0	0.02138	0
0.02443	0	0.02443	0	0.02443	0	0.02443	0
0.02748	0	0.02748	0	0.02748	0	0.02748	0
0.03054	0	0.03054	0	0.03054	0	0.03054	0
0.03359	0	0.03359	0	0.03359	0	0.03359	0
0.03665	0	0.03665	0	0.03665	0	0.03665	0
0.0397	0	0.0397	0	0.0397	0	0.0397	0
0.04275	0	0.04275	0	0.04275	0	0.04275	0
0.04581	0	0.04581	0	0.04581	0	0.04581	0
0.04886	0	0.04886	0	0.04886	0	0.04886	0
0.05191	0	0.05191	0	0.05191	0	0.05191	0
0.05497	0	0.05497	0	0.05497	0	0.05497	0
0.05802	0	0.05802	0	0.05802	0	0.05802	0
0.06108	0	0.06108	0	0.06108	0	0.06108	0
0.06413	0	0.06413	0	0.06413	0	0.06413	0
0.06718	0	0.06718	0	0.06718	0	0.06718	0
0.07024	0	0.07024	0	0.07024	0	0.07024	0
0.07329	0	0.07329	0	0.07329	0	0.07329	0
0.07635	0	0.07635	0	0.07635	0	0.07635	0
0.0794	0	0.0794	0	0.0794	0	0.0794	0
0.08245	0	0.08245	0	0.08245	0	0.08245	0
0.08551	0	0.08551	0	0.08551	0	0.08551	0
0.08856	0	0.08856	0	0.08856	0	0.08856	0
0.09161	0	0.09161	0	0.09161	0	0.09161	0
0.09467	0	0.09467	0	0.09467	0	0.09467	0
0.09772	0	0.09772	0	0.09772	0	0.09772	0
0.10078	0	0.10078	0	0.10078	0	0.10078	0
0.10383	0	0.10383	0	0.10383	0	0.10383	0
0.10688	0	0.10688	0	0.10688	0	0.10688	0
0.10994	0	0.10994	0	0.10994	0	0.10994	0
0.11299	0	0.11299	0	0.11299	0	0.11299	0
0.11604	0	0.11604	0	0.11604	0	0.11604	0
0.1191	0	0.1191	0	0.1191	0	0.1191	0
0.12215	0	0.12215	0	0.12215	0	0.12215	0
0.12521	0	0.12521	0	0.12521	0	0.12521	0
0.12826	0	0.12826	0	0.12826	0	0.12826	0
0.13131	0	0.13131	0	0.13131	0	0.13131	0
0.13437	0	0.13437	0	0.13437	0	0.13437	0
0.13742	0	0.13742	0	0.13742	0	0.13742	0
0.14048	0	0.14048	0	0.14048	0	0.14048	0
0.14353	0	0.14353	0	0.14353	0	0.14353	0
0.14658	0	0.14658	0	0.14658	0	0.14658	0
0.14964	0	0.14964	0	0.14964	0	0.14964	0
0.15269	0	0.15269	0	0.15269	0	0.15269	0
0.15574	0	0.15574	0	0.15574	0	0.15574	0
0.1588	0	0.1588	0	0.1588	0	0.1588	0
0.16185	0	0.16185	0	0.16185	0	0.16185	0
0.16491	0	0.16491	0	0.16491	0	0.16491	0
0.16796	0	0.16796	0	0.16796	0	0.16796	0
0.17101	0	0.17101	0	0.17101	0	0.17101	0
0.17407	0	0.17407	0	0.17407	0	0.17407	0
0.17712	0	0.17712	0	0.17712	0	0.17712	0
0.18017	0	0.18017	0	0.18017	0	0.18017	0
0.18323	0	0.18323	0	0.18323	0	0.18323	0
0.18628	0	0.18628	0	0.18628	0	0.18628	0
0.18934	0	0.18934	0	0.18934	0	0.18934	0
0.19239	0	0.19239	0	0.19239	0	0.19239	0
0.19544	0	0.19544	0	0.19544	0	0.19544	0
0.1985	0	0.1985	0	0.1985	0	0.1985	0
0.20155	0	0.20155	0	0.20155	0	0.20155	0
0.20461	0	0.20461	0	0.20461	0	0.20461	0
0.20766	0	0.20766	0	0.20766	0	0.20766	0
0.21071	0	0.21071	0	0.21071	0	0.21071	0
0.21377	0	0.21377	0	0.21377	0	0.21377	0
0.21682	0	0.21682	0	0.21682	0	0.21682	0
0.21987	0	0.21987	0	0.21987	0	0.21987	0
0.22293	0	0.22293	0	0.22293	0	0.22293	0
0.22598	0	0.22598	0	0.22598	0	0.22598	0
0.22904	0	0.22904	0	0.22904	0	0.22904	0
0.23209	0	0.23209	0	0.23209	0	0.23209	0
0.23514	0	0.23514	0	0.23514	0	0.23514	0
0.2382	0	0.2382	0	0.2382	0	0.2382	0
0.24125	0	0.24125	0	0.24125	0	0.24125	0
0.2443	0	0.2443	0	0.2443	0	0.2443	0
0.24736	0	0.24736	0	0.24736	0	0.24736	0
0.25041	0	0.25041	0	0.25041	0	0.25041	0
0.25347	0	0.25347	0	0.25347	0	0.25347	0
0.25652	0	0.25652	0	0.25652	0	0.25652	0
0.25957	0	0.25957	0	0.25957	0	0.25957	0
0.26263	0	0.26263	0	0.26263	0	0.26263	0
0.26568	0	0.26568	0	0.26568	0	0.26568	0
0.26874	0	0.26874	0	0.26874	0	0.26874	0
0.27179	0	0.27179	0	0.27179	0	0.27179	0
0.27484	0	0.27484	0	0.27484	0	0.27484	0
0.2779	0	0.2779	0	0.2779	0	0.2779	0
0.28095	0	0.28095	0	0.28095	0	0.28095	0
0.284	0	0.284	0	0.284	0	0.284	0
0.28706	0	0.28706	0	0.28706	0	0.28706	0
0.29011	0	0.29011	0	0.29011	0	0.29011	0
0.29317	0	0.29317	0	0.29317	0	0.29317	0
0.29622	0	0.29622	0	0.29622	0	0.29622	0
0.29927	0	0.29927	0	0.29927	0	0.29927	0
0.30233	0	0.30233	0	0.30233	0	0.30233	0
0.30538	0	0.30538	0	0.30538	0	0.30538	0
0.30843	0	0.30843	0	0.30843	0	0.30843	0
0.31149	0	0.31149	0	0.31149	0	0.31149	0
0.31454	0	0.31454	0	0.31454	0	0.31454	0
0.3176	0	0.3176	0	0.3176	0	0.3176	0
0.32065	0	0.32065	0	0.32065	0	0.32065	0
0.3237	0	0.3237	0	0.3237	0	0.3237	0
0.32676	0	0.32676	0	0.32676	0	0.32676	0
0.32981	0	0.32981	0	0.32981	0	0.32981	0
0.33286	0	0.33286	0	0.33286	0	0.33286	0
0.33592	0	0.33592	0	0.33592	0	0.33592	0
0.33897	0	0.33897	0	0.33897	0	0.33897	0
0.34203	0	0.34203	0	0.34203	0	0.34203	0
0.34508	0	0.34508	0	0.34508	0	0.34508	0
0.34813	0	0.34813	0	0.34813	0	0.34813	0
0.35119	0	0.35119	0	0.35119	0	0.35119	0
0.35424	0	0.35424	0	0.35424	0	0.35424	0
0.3573	0	0.3573	0	0.3573	0	0.3573	0
0.36035	0	0.36035	0	0.36035	0	0.36035	0
0.3634	0	0.3634	0	0.3634	0	0.3634	0
0.36646	0	0.36646	0	0.36646	0	0.36646	0
0.36951	0	0.36951	0	0.36951	0	0.36951	0
0.37256	0	0.37256	0	0.37256	0	0.37256	0
0.37562	0	0.37562	0	0.37562	0	0.37562	0
0.37867	0	0.37867	0	0.37867	0	0.37867	0
0.38173	0	0.38173	0	0.38173	0	0.38173	0
0.38478	0	0.38478	0	0.38478	0	0.38478	0
0.38783	0	0.38783	0	0.38783	0	0.38783	0
0.39089	0	0.39089	0	0.39089	0	0.39089	0
0.39394	0	0.39394	0	0.39394	0	0.39394	0
0.39699	0	0.39699	0	0.39699	0	0.39699	0
0.40005	0	0.40005	0	0.40005	0	0.40005	0
0.4031	0	0.4031	0	0.4031	0	0.4031	0
0.40616	0	0.40616	0	0.40616	0	0.40616	0
0.40921	0	0.40921	0	0.40921	0	0.40921	0
0.41226	0	0.41226	0	0.41226	0	0.41226	0
0.41532	0	0.41532	0	0.41532	0	0.41532	0
0.41837	0	0.41837	0	0.41837	0	0.41837	0
0.42143	0	0.42143	0	0.42143	0	0.42143	0
0.42448	0	0.42448	0	0.42448	0	0.42448	0
0.42753	0	0.42753	0	0.42753	0	0.42753	0
0.43059	0	0.43059	0	0.43059	0	0.43059	0
0.43364	0	0.43364	0	0.43364	0	0.43364	0
0.43669	0	0.43669	0	0.43669	0	0.43669	0
0.43975	0	0.43975	0	0.43975	0	0.43975	0
0.4428	0	0.4428	0	0.4428	0	0.4428	0
0.44586	0	0.44586	0	0.44586	0	0.44586	0
0.44891	0	0.44891	0	0.44891	0	0.44891	0
0.45196	0	0.45196	0	0.45196	0	0.45196	0
0.45502	0	0.45502	0	0.45502	0	0.45502	0
0.45807	0	0.45807	0	0.45807	0	0.45807	0
0.46112	0	0.46112	0	0.46112	0	0.46112	0
0.46418	0	0.46418	0	0.46418	0	0.46418	0
0.46723	0	0.46723	0	0.46723	0	0.46723	0
0.47029	0	0.47029	0	0.47029	0	0.47029	0
0.47334	0	0.47334	0	0.47334	0	0.47334	0
0.47639	0	0.47639	0	0.47639	0	0.47639	0
0.47945	0	0.47945	0	0.47945	0	0.47945	0
0.4825	0	0.4825	0	0.4825	0	0.4825	0
0.48556	0	0.48556	0	0.48556	0	0.48556	0
0.48861	0	0.48861	0	0.48861	0	0.48861	0
0.49166	0	0.49166	0	0.49166	0	0.49166	0
0.49472	0	0.49472	0	0.49472	0	0.49472	0
0.49777	0	0.49777	0	0.49777	0	0.49777	0
0.50082	0	0.50082	0	0.50082	0	0.50082	0
0.50388	0	0.50388	0	0.50388	0	0.50388	0
0.50693	0	0.50693	0	0.50693	0	0.50693	0
0.50999	0	0.50999	0	0.50999	0	0.50999	0
0.51304	0	0.51304	0	0.51304	0	0.51304	0
0.51609	0	0.51609	0	0.51609	0	0.51609	0
0.51915	0	0.51915	0	0.51915	0	0.51915	0
0.5222	0	0.5222	0	0.5222	0	0.5222	0
0.52525	0	0.52525	0	0.52525	0	0.52525	0
0.52831	0	0.52831	0	0.52831	0	0.52831	0
0.53136	0	0.53136	0	0.53136	0	0.53136	0
0.53442	0	0.53442	0	0.53442	0	0.53442	0
0.53747	0	0.53747	0	0.53747	0	0.53747	0
0.54052	0	0.54052	0	0.54052	0	0.54052	0
0.54358	0	0.54358	0	0.54358	0	0.54358	0
0.54663	0	0.54663	0	0.54663	0	0.54663	0
0.54969	0	0.54969	0	0.54969	0	0.54969	0
0.55274	0	0.55274	0	0.55274	0	0.55274	0
0.55579	0	0.55579	0	0.55579	0	0.55579	0
0.55885	0	0.55885	0	0.55885	0	0.55885	0
0.5619	0	0.5619	0	0.5619	0	0.5619	0
0.56495	0	0.56495	0	0.56495	0	0.56495	0
0.56801	0	0.56801	0	0.56801	0	0.56801	0
0.57106	0	0.57106	0	0.57106	0	0.57106	0
0.57412	0	0.57412	0	0.57412	0	0.57412	0
0.57717	0	0.57717	0	0.57717	0	0.57717	0
0.58022	0	0.58022	0	0.58022	0	0.58022	0
0.58328	0	0.58328	0	0.58328	0	0.58328	0
0.58633	0	0.58633	0	0.58633	0	0.58633	0
0.58938	0	0.58938	0	0.58938	0	0.58938	0
0.59244	0	0.59244	0	0.59244	0	0.59244	0
0.59549	0	0.59549	0	0.59549	0	0.59549	0
0.59855	0	0.59855	0	0.59855	0	0.59855	0
0.6016	0	0.6016	0	0.6016	0	0.6016	0
0.60465	0	0.60465	0	0.60465	0	0.60465	0
0.60771	0	0.60771	0	0.60771	0	0.60771	0
0.61076	0	0.61076	0	0.61076	0	0.61076	0
0.61382	0	0.61382	0	0.61382	0	0.61382	0
0.61687	0	0.61687	0	0.61687	0	0.61687	0
0.61992	0	0.61992	0	0.61992	0	0.61992	0
0.62298	0	0.62298	0	0.62298	0	0.62298	0
0.62603	0	0.62603	0	0.62603	0	0.62603	0
0.62908	0	0.62908	0	0.62908	0	0.62908	0
0.63214	0	0.63214	0	0.63214	0	0.63214	0
0.63519	5	0.63519	12	0.63519	12	0.63519	5
0.63825	5	0.63825	5	0.63825	12	0.63825	9
0.6413	6	0.6413	14	0.6413	11	0.6413	3
0.64435	8	0.64435	5	0.64435	9	0.64435	4
0.64741	6	0.64741	10	0.64741	14	0.64741	6
0.65046	6	0.65046	14	0.65046	10	0.65046	7
0.65351	4	0.65351	6	0.65351	15	0.65351	8
0.65657	4	0.65657	8	0.65657	14	0.65657	7
0.65962	5	0.65962	2	0.65962	12	0.65962	3
0.66268	4	0.66268	9	0.66268	8	0.66268	2
0.66573	10	0.66573	4	0.66573	11	0.66573	9
0.66878	5	0.66878	5	0.66878	10	0.66878	11
0.67184	6	0.67184	13	0.67184	4	0.67184	7
0.67489	6	0.67489	5	0.67489	16	0.67489	6
0.67795	6	0.67795	9	0.67795	8	0.67795	4
0.681	5	0.681	6	0.681	11	0.681	5
0.68405	5	0.68405	4	0.68405	4	0.68405	4
0.68711	3	0.68711	10	0.68711	12	0.68711	6
0.69016	10	0.69016	6	0.69016	5	0.69016	8
0.69321	8	0.69321	12	0.69321	8	0.69321	2
0.69627	6	0.69627	4	0.69627	12	0.69627	5
0.69932	9	0.69932	7	0.69932	13	0.69932	7
0.70238	4	0.70238	4	0.70238	10	0.70238	4
0.70543	6	0.70543	7	0.70543	10	0.70543	5
0.70848	11	0.70848	6	0.70848	4	0.70848	8
0.71154	14	0.71154	10	0.71154	11	0.71154	5
0.71459	6	0.71459	6	0.71459	3	0.71459	8
0.71764	3	0.71764	5	0.71764	5	0.71764	5
0.7207	3	0.7207	6	0.7207	8	0.7207	3
0.72375	8	0.72375	7	0.72375	14	0.72375	6
0.72681	5	0.72681	9	0.72681	11	0.72681	3
0.72986	5	0.72986	8	0.72986	12	0.72986	4
0.73291	6	0.73291	5	0.73291	6	0.73291	7
0.73597	6	0.73597	7	0.73597	11	0.73597	7
0.73902	8	0.73902	5	0.73902	7	0.73902	4
0.74208	6	0.74208	8	0.74208	14	0.74208	3
0.74513	9	0.74513	5	0.74513	6	0.74513	8
0.74818	5	0.74818	10	0.74818	10	0.74818	3
0.75124	8	0.75124	9	0.75124	3	0.75124	6
0.75429	7	0.75429	3	0.75429	16	0.75429	4
0.75734	9	0.75734	8	0.75734	8	0.75734	6
0.7604	6	0.7604	6	0.7604	10	0.7604	3
0.76345	6	0.76345	7	0.76345	9	0.76345	3
0.76651	7	0.76651	7	0.76651	11	0.76651	5
0.76956	7	0.76956	5	0.76956	15	0.76956	3
0.77261	6	0.77261	8	0.77261	15	0.77261	5
0.77567	7	0.77567	8	0.77567	11	0.77567	8
0.77872	5	0.77872	9	0.77872	9	0.77872	7
0.78177	12	0.78177	4	0.78177	9	0.78177	6
0.78483	6	0.78483	9	0.78483	14	0.78483	4
0.78788	6	0.78788	6	0.78788	10	0.78788	5
0.79094	8	0.79094	8	0.79094	9	0.79094	7
0.79399	8	0.79399	6	0.79399	11	0.79399	7
0.79704	7	0.79704	1	0.79704	7	0.79704	4
0.8001	8	0.8001	14	0.8001	6	0.8001	5
0.80315	3	0.80315	6	0.80315	13	0.80315	8
0.80621	7	0.80621	6	0.80621	13	0.80621	4
0.80926	8	0.80926	6	0.80926	12	0.80926	10
0.81231	6	0.81231	6	0.81231	7	0.81231	5
0.81537	10	0.81537	11	0.81537	9	0.81537	7
0.81842	9	0.81842	8	0.81842	9	0.81842	8
0.82147	9	0.82147	9	0.82147	12	0.82147	2
0.82453	3	0.82453	7	0.82453	9	0.82453	2
0.82758	8	0.82758	8	0.82758	12	0.82758	5
0.83064	8	0.83064	4	0.83064	12	0.83064	6
0.83369	7	0.83369	9	0.83369	16	0.83369	3
0.83674	10	0.83674	6	0.83674	8	0.83674	2
0.8398	6	0.8398	7	0.8398	13	0.8398	10
0.84285	5	0.84285	6	0.84285	13	0.84285	4
0.8459	9	0.8459	8	0.8459	12	0.8459	6
0.84896	8	0.84896	8	0.84896	15	0.84896	3
0.85201	9	0.85201	10	0.85201	15	0.85201	8
0.85507	12	0.85507	8	0.85507	17	0.85507	3
0.85812	3	0.85812	11	0.85812	12	0.85812	5
0.86117	7	0.86117	10	0.86117	14	0.86117	9
0.86423	9	0.86423	8	0.86423	17	0.86423	10
0.86728	15	0.86728	14	0.86728	8	0.86728	10
0.87033	19	0.87033	16	0.87033	19	0.87033	8
0.87339	17	0.87339	17	0.87339	13	0.87339	10
0.87644	16	0.87644	21	0.87644	37	0.87644	8
0.8795	15	0.8795	17	0.8795	20	0.8795	7
0.88255	13	0.88255	17	0.88255	34	0.88255	9
0.8856	24	0.8856	19	0.8856	26	0.8856	10
0.88866	14	0.88866	33	0.88866	32	0.88866	15
0.89171	22	0.89171	25	0.89171	38	0.89171	21
0.89477	26	0.89477	33	0.89477	39	0.89477	20
0.89782	36	0.89782	32	0.89782	56	0.89782	19
0.90087	33	0.90087	42	0.90087	76	0.90087	21
0.90393	38	0.90393	49	0.90393	77	0.90393	20
0.90698	43	0.90698	46	0.90698	77	0.90698	27
0.91003	43	0.91003	37	0.91003	91	0.91003	28
0.91309	54	0.91309	61	0.91309	106	0.91309	31
0.91614	62	0.91614	68	0.91614	99	0.91614	30
0.9192	67	0.9192	72	0.9192	113	0.9192	33
0.92225	79	0.92225	92	0.92225	130	0.92225	30
0.9253	94	0.9253	90	0.9253	142	0.9253	65
0.92836	104	0.92836	115	0.92836	179	0.92836	52
0.93141	104	0.93141	108	0.93141	178	0.93141	61
0.93446	122	0.93446	136	0.93446	178	0.93446	56
0.93752	125	0.93752	117	0.93752	213	0.93752	53
0.94057	132	0.94057	166	0.94057	224	0.94057	65
0.94363	128	0.94363	130	0.94363	287	0.94363	78
0.94668	158	0.94668	171	0.94668	285	0.94668	77
0.94973	191	0.94973	196	0.94973	310	0.94973	107
0.95279	200	0.95279	194	0.95279	313	0.95279	118
0.95584	221	0.95584	225	0.95584	351	0.95584	121
0.9589	222	0.9589	215	0.9589	392	0.9589	145
0.96195	257	0.96195	249	0.96195	404	0.96195	156
0.965	235	0.965	239	0.965	425	0.965	156
0.96806	229	0.96806	260	0.96806	448	0.96806	161
0.97111	269	0.97111	307	0.97111	491	0.97111	168
0.97416	328	0.97416	336	0.97416	523	0.97416	207
0.97722	294	0.97722	290	0.97722	562	0.97722	233
0.98027	354	0.98027	336	0.98027	586	0.98027	240
0.98333	360	0.98333	344	0.98333	591	0.98333	259
0.98638	404	0.98638	370	0.98638	631	0.98638	274
0.98943	423	0.98943	345	0.98943	702	0.98943	268
0.99249	441	0.99249	397	0.99249	763	0.99249	302
0.99554	455	0.99554	402	0.99554	770	0.99554	307
0.99859	465	0.99859	423	0.99859	793	0.99859	316
1.00165	533	1.00165	463	1.00165	822	1.00165	312
1.0047	528	1.0047	437	1.0047	843	1.0047	349
1.00776	523	1.00776	477	1.00776	946	1.00776	377
1.01081	588	1.01081	460	1.01081	972	1.01081	386
1.01386	569	1.01386	544	1.01386	1000	1.01386	439
1.01692	560	1.01692	540	1.01692	969	1.01692	420
1.01997	628	1.01997	530	1.01997	1020	1.01997	434
1.02303	620	1.02303	568	1.02303	1061	1.02303	439
1.02608	685	1.02608	589	1.02608	1087	1.02608	498
1.02913	659	1.02913	614	1.02913	1208	1.02913	485
1.03219	725	1.03219	632	1.03219	1162	1.03219	544
1.03524	691	1.03524	572	1.03524	1203	1.03524	534
1.03829	713	1.03829	649	1.03829	1198	1.03829	560
1.04135	743	1.04135	645	1.04135	1214	1.04135	552
1.0444	793	1.0444	670	1.0444	1266	1.0444	578
1.04746	809	1.04746	708	1.04746	1305	1.04746	626
1.05051	789	1.05051	676	1.05051	1383	1.05051	632
1.05356	815	1.05356	709	1.05356	1384	1.05356	671
1.05662	820	1.05662	749	1.05662	1400	1.05662	652
1.05967	830	1.05967	738	1.05967	1436	1.05967	658
1.06272	893	1.06272	660	1.06272	1426	1.06272	723
1.06578	856	1.06578	776	1.06578	1427	1.06578	726
1.06883	864	1.06883	796	1.06883	1473	1.06883	701
1.07189	858	1.07189	755	1.07189	1555	1.07189	695
1.07494	916	1.07494	771	1.07494	1533	1.07494	730
1.07799	923	1.07799	792	1.07799	1644	1.07799	752
1.08105	905	1.08105	830	1.08105	1576	1.08105	719
1.0841	951	1.0841	817	1.0841	1609	1.0841	811
1.08716	949	1.08716	821	1.08716	1669	1.08716	846
1.09021	985	1.09021	902	1.09021	1596	1.09021	820
1.09326	965	1.09326	859	1.09326	1641	1.09326	843
1.09632	987	1.09632	903	1.09632	1702	1.09632	890
1.09937	1032	1.09937	887	1.09937	1714	1.09937	880
1.10242	993	1.10242	990	1.10242	1738	1.10242	926
1.10548	997	1.10548	898	1.10548	1828	1.10548	918
1.10853	1050	1.10853	959	1.10853	1802	1.10853	949
1.11159	1020	1.11159	928	1.11159	1823	1.11159	908
1.11464	1098	1.11464	953	1.11464	1847	1.11464	954
1.11769	1053	1.11769	1003	1.11769	1879	1.11769	992
1.12075	1123	1.12075	984	1.12075	1797	1.12075	984
1.1238	1071	1.1238	1025	1.1238	1870	1.1238	982
1.12685	1089	1.12685	1003	1.12685	1887	1.12685	986
1.12991	1131	1.12991	975	1.12991	1849	1.12991	1044
1.13296	1131	1.13296	1020	1.13296	1908	1.13296	994
1.13602	1187	1.13602	992	1.13602	1964	1.13602	1031
1.13907	1132	1.13907	977	1.13907	1986	1.13907	1017
1.14212	1102	1.14212	1041	1.14212	2026	1.14212	1019
1.14518	1212	1.14518	986	1.14518	2091	1.14518	1042
1.14823	1190	1.14823	1030	1.14823	2092	1.14823	1091
1.15129	1226	1.15129	1115	1.15129	2021	1.15129	1060
1.15434	1153	1.15434	1068	1.15434	2068	1.15434	1046
1.15739	1192	1.15739	943	1.15739	2043	1.15739	1128
1.16045	1152	1.16045	1024	1.16045	2060	1.16045	1123
1.1635	1176	1.1635	1024	1.1635	2088	1.1635	1156
1.16655	1197	1.16655	1108	1.16655	2082	1.16655	1162
1.16961	1197	1.16961	1051	1.16961	2134	1.16961	1117
1.17266	1221	1.17266	1048	1.17266	2172	1.17266	1158
1.17572	1240	1.17572	1116	1.17572	2073	1.17572	1132
1.17877	1220	1.17877	1054	1.17877	2106	1.17877	1178
1.18182	1209	1.18182	1106	1.18182	2157	1.18182	1199
1.18488	1191	1.18488	1085	1.18488	2126	1.18488	1118
1.18793	1229	1.18793	1073	1.18793	2080	1.18793	1224
1.19098	1221	1.19098	1091	1.19098	2144	1.19098	1176
1.19404	1236	1.19404	1097	1.19404	2215	1.19404	1206
1.19709	1212	1.19709	1076	1.19709	2226	1.19709	1180
1.20015	1255	1.20015	1151	1.20015	2188	1.20015	1246
1.2032	1265	1.2032	1109	1.2032	2231	1.2032	1220
1.20625	1263	1.20625	1111	1.20625	2154	1.20625	1253
1.20931	1193	1.20931	1079	1.20931	2211	1.20931	1195
1.21236	1223	1.21236	1097	1.21236	2262	1.21236	1290
1.21542	1236	1.21542	1115	1.21542	2195	1.21542	1226
1.21847	1289	1.21847	1147	1.21847	2217	1.21847	1251
1.22152	1290	1.22152	1038	1.22152	2161	1.22152	1243
1.22458	1267	1.22458	1089	1.22458	2276	1.22458	1281
1.22763	1292	1.22763	1121	1.22763	2218	1.22763	1238
1.23068	1261	1.23068	1119	1.23068	2229	1.23068	1272
1.23374	1251	1.23374	1167	1.23374	2289	1.23374	1314
1.23679	1321	1.23679	1098	1.23679	2175	1.23679	1290
1.23985	1207	1.23985	1111	1.23985	2169	1.23985	1254
1.2429	1267	1.2429	1113	1.2429	2262	1.2429	1307
1.24595	1279	1.24595	1061	1.24595	2212	1.24595	1318
1.24901	1211	1.24901	1146	1.24901	2266	1.24901	1342
1.25206	1277	1.25206	1114	1.25206	2172	1.25206	1303
1.25511	1188	1.25511	1060	1.25511	2274	1.25511	1213
1.25817	1303	1.25817	1109	1.25817	2273	1.25817	1309
1.26122	1260	1.26122	1145	1.26122	2211	1.26122	1273
1.26428	1255	1.26428	1095	1.26428	2192	1.26428	1266
1.26733	1218	1.26733	1040	1.26733	2178	1.26733	1258
1.27038	1234	1.27038	1131	1.27038	2248	1.27038	1258
1.27344	1195	1.27344	1140	1.27344	2381	1.27344	1332
1.27649	1246	1.27649	1112	1.27649	2224	1.27649	1265
1.27955	1191	1.27955	1074	1.27955	2193	1.27955	1246
1.2826	1178	1.2826	1081	1.2826	2222	1.2826	1308
1.28565	1217	1.28565	1144	1.28565	2209	1.28565	1338
1.28871	1244	1.28871	1077	1.28871	2253	1.28871	1312
1.29176	1270	1.29176	1069	1.29176	2188	1.29176	1301
1.29481	1180	1.29481	1110	1.29481	2260	1.29481	1276
1.29787	1280	1.29787	1118	1.29787	2199	1.29787	1269
1.30092	1196	1.30092	1053	1.30092	2211	1.30092	1321
1.30398	1204	1.30398	1032	1.30398	2172	1.30398	1273
1.30703	1253	1.30703	1038	1.30703	2213	1.30703	1254
1.31008	1203	1.31008	1092	1.31008	2197	1.31008	1258
1.31314	1158	1.31314	1040	1.31314	2148	1.31314	1219
1.31619	1114	1.31619	1083	1.31619	2215	1.31619	1216
1.31924	1158	1.31924	1054	1.31924	2168	1.31924	1306
1.3223	1225	1.3223	1003	1.3223	2097	1.3223	1210
1.32535	1204	1.32535	1054	1.32535	2089	1.32535	1280
1.32841	1122	1.32841	1060	1.32841	2078	1.32841	1182
1.33146	1167	1.33146	1052	1.33146	2048	1.33146	1269
1.33451	1141	1.33451	978	1.33451	2029	1.33451	1212
1.33757	1129	1.33757	1046	1.33757	2133	1.33757	1159
1.34062	1178	1.34062	1013	1.34062	2082	1.34062	1153
1.34368	1151	1.34368	1046	1.34368	2075	1.34368	1179
1.34673	1135	1.34673	1041	1.34673	2023	1.34673	1187
1.34978	1162	1.34978	972	1.34978	2025	1.34978	1238
1.35284	1121	1.35284	998	1.35284	2067	1.35284	1191
1.35589	1143	1.35589	980	1.35589	2040	1.35589	1227
1.35894	1124	1.35894	974	1.35894	1983	1.35894	1214
1.362	1113	1.362	1009	1.362	2071	1.362	1183
1.36505	1071	1.36505	1009	1.36505	2093	1.36505	1126
1.36811	1113	1.36811	929	1.36811	2091	1.36811	1173
1.37116	1067	1.37116	972	1.37116	1975	1.37116	1144
1.37421	1083	1.37421	912	1.37421	1971	1.37421	1182
1.37727	1044	1.37727	937	1.37727	1875	1.37727	1181
1.38032	1060	1.38032	973	1.38032	1913	1.38032	1183
1.38337	1080	1.38337	916	1.38337	1940	1.38337	1148
1.38643	1012	1.38643	921	1.38643	1911	1.38643	1152
1.38948	1071	1.38948	852	1.38948	1931	1.38948	1133
1.39254	1054	1.39254	899	1.39254	1868	1.39254	1088
1.39559	960	1.39559	915	1.39559	1858	1.39559	1067
1.39864	1009	1.39864	906	1.39864	1835	1.39864	1053
1.4017	1039	1.4017	896	1.4017	1886	1.4017	1089
1.40475	1012	1.40475	877	1.40475	1917	1.40475	1113
1.40781	1007	1.40781	958	1.40781	1786	1.40781	1158
1.41086	1010	1.41086	797	1.41086	1878	1.41086	1137
1.41391	977	1.41391	850	1.41391	1822	1.41391	1078
1.41697	974	1.41697	827	1.41697	1844	1.41697	1093
1.42002	973	1.42002	859	1.42002	1823	1.42002	1118
1.42307	938	1.42307	805	1.42307	1870	1.42307	1043
1.42613	972	1.42613	843	1.42613	1810	1.42613	1104
1.42918	1015	1.42918	825	1.42918	1778	1.42918	1023
1.43224	948	1.43224	821	1.43224	1750	1.43224	1089
1.43529	924	1.43529	879	1.43529	1786	1.43529	1081
1.43834	953	1.43834	821	1.43834	1753	1.43834	1026
1.4414	966	1.4414	778	1.4414	1819	1.4414	999
1.44445	927	1.44445	831	1.44445	1696	1.44445	1103
1.4475	917	1.4475	779	1.4475	1748	1.4475	1081
1.45056	925	1.45056	859	1.45056	1685	1.45056	1052
1.45361	926	1.45361	789	1.45361	1783	1.45361	1012
1.45667	956	1.45667	828	1.45667	1833	1.45667	1004
1.45972	925	1.45972	771	1.45972	1704	1.45972	1062
1.46277	909	1.46277	860	1.46277	1729	1.46277	995
1.46583	823	1.46583	802	1.46583	1775	1.46583	1040
1.46888	851	1.46888	759	1.46888	1737	1.46888	973
1.47193	857	1.47193	829	1.47193	1687	1.47193	1009
1.47499	916	1.47499	829	1.47499	1689	1.47499	1001
1.47804	890	1.47804	751	1.47804	1719	1.47804	968
1.4811	884	1.4811	767	1.4811	1683	1.4811	993
1.48415	883	1.48415	757	1.48415	1684	1.48415	957
1.4872	882	1.4872	761	1.4872	1664	1.4872	937
1.49026	862	1.49026	744	1.49026	1601	1.49026	935
1.49331	821	1.49331	751	1.49331	1640	1.49331	1004
1.49637	845	1.49637	742	1.49637	1584	1.49637	925
1.49942	844	1.49942	776	1.49942	1651	1.49942	1015
1.50247	860	1.50247	734	1.50247	1660	1.50247	979
1.50553	837	1.50553	780	1.50553	1627	1.50553	926
1.50858	809	1.50858	729	1.50858	1645	1.50858	943
1.51163	836	1.51163	702	1.51163	1616	1.51163	882
1.51469	876	1.51469	709	1.51469	1690	1.51469	973
1.51774	839	1.51774	757	1.51774	1561	1.51774	867
1.5208	796	1.5208	755	1.5208	1566	1.5208	965
1.52385	802	1.52385	742	1.52385	1649	1.52385	975
1.5269	768	1.5269	771	1.5269	1522	1.5269	883
1.52996	848	1.52996	692	1.52996	1580	1.52996	932
1.53301	776	1.53301	725	1.53301	1543	1.53301	910
1.53606	777	1.53606	818	1.53606	1533	1.53606	914
1.53912	845	1.53912	668	1.53912	1498	1.53912	934
1.54217	775	1.54217	757	1.54217	1579	1.54217	936
1.54523	790	1.54523	682	1.54523	1529	1.54523	910
1.54828	793	1.54828	662	1.54828	1491	1.54828	883
1.55133	835	1.55133	700	1.55133	1481	1.55133	900
1.55439	730	1.55439	708	1.55439	1510	1.55439	884
1.55744	832	1.55744	699	1.55744	1523	1.55744	902
1.5605	727	1.5605	735	1.5605	1470	1.5605	879
1.56355	759	1.56355	670	1.56355	1504	1.56355	900
1.5666	723	1.5666	731	1.5666	1447	1.5666	821
1.56966	786	1.56966	707	1.56966	1466	1.56966	862
1.57271	768	1.57271	692	1.57271	1417	1.57271	859
1.57576	819	1.57576	624	1.57576	1508	1.57576	857
1.57882	730	1.57882	697	1.57882	1507	1.57882	873
1.58187	737	1.58187	696	1.58187	1470	1.58187	827
1.58493	736	1.58493	643	1.58493	1462	1.58493	831
1.58798	739	1.58798	645	1.58798	1435	1.58798	761
1.59103	725	1.59103	684	1.59103	1413	1.59103	835
1.59409	731	1.59409	629	1.59409	1419	1.59409	830
1.59714	746	1.59714	638	1.59714	1447	1.59714	851
1.60019	725	1.60019	633	1.60019	1482	1.60019	855
1.60325	743	1.60325	608	1.60325	1412	1.60325	769
1.6063	664	1.6063	610	1.6063	1377	1.6063	805
1.60936	739	1.60936	593	1.60936	1411	1.60936	798
1.61241	731	1.61241	640	1.61241	1433	1.61241	800
1.61546	679	1.61546	656	1.61546	1375	1.61546	789
1.61852	733	1.61852	636	1.61852	1363	1.61852	769
1.62157	675	1.62157	641	1.62157	1344	1.62157	800
1.62463	696	1.62463	604	1.62463	1353	1.62463	812
1.62768	694	1.62768	654	1.62768	1408	1.62768	776
1.63073	716	1.63073	635	1.63073	1314	1.63073	783
1.63379	704	1.63379	607	1.63379	1341	1.63379	844
1.63684	713	1.63684	590	1.63684	1391	1.63684	828
1.63989	672	1.63989	558	1.63989	1315	1.63989	779
1.64295	687	1.64295	638	1.64295	1267	1.64295	763
1.646	697	1.646	562	1.646	1294	1.646	743
1.64906	688	1.64906	580	1.64906	1323	1.64906	765
1.65211	621	1.65211	588	1.65211	1292	1.65211	696
1.65516	631	1.65516	579	1.65516	1278	1.65516	771
1.65822	657	1.65822	564	1.65822	1266	1.65822	753
1.66127	598	1.66127	567	1.66127	1337	1.66127	733
1.66432	636	1.66432	603	1.66432	1278	1.66432	759
1.66738	639	1.66738	551	1.66738	1272	1.66738	733
1.67043	625	1.67043	563	1.67043	1292	1.67043	722
1.67349	596	1.67349	538	1.67349	1228	1.67349	740
1.67654	637	1.67654	502	1.67654	1294	1.67654	719
1.67959	625	1.67959	581	1.67959	1257	1.67959	727
1.68265	616	1.68265	524	1.68265	1280	1.68265	784
1.6857	633	1.6857	519	1.6857	1173	1.6857	696
1.68876	608	1.68876	545	1.68876	1173	1.68876	690
1.69181	603	1.69181	527	1.69181	1213	1.69181	673
1.69486	589	1.69486	482	1.69486	1195	1.69486	633
1.69792	599	1.69792	521	1.69792	1152	1.69792	749
1.70097	580	1.70097	530	1.70097	1149	1.70097	650
1.70402	560	1.70402	504	1.70402	1163	1.70402	702
1.70708	595	1.70708	536	1.70708	1202	1.70708	645
1.71013	557	1.71013	485	1.71013	1152	1.71013	658
1.71319	552	1.71319	518	1.71319	1112	1.71319	708
1.71624	531	1.71624	509	1.71624	1197	1.71624	673
1.71929	530	1.71929	524	1.71929	1103	1.71929	630
1.72235	551	1.72235	462	1.72235	1142	1.72235	639
1.7254	570	1.7254	445	1.7254	1081	1.7254	625
1.72845	513	1.72845	497	1.72845	1112	1.72845	636
1.73151	540	1.73151	473	1.73151	1061	1.73151	636
1.73456	567	1.73456	476	1.73456	1070	1.73456	653
1.73762	576	1.73762	501	1.73762	1065	1.73762	566
1.74067	551	1.74067	487	1.74067	1027	1.74067	630
1.74372	539	1.74372	472	1.74372	1000	1.74372	618
1.74678	511	1.74678	449	1.74678	1028	1.74678	610
1.74983	480	1.74983	459	1.74983	1042	1.74983	626
1.75289	509	1.75289	460	1.75289	1019	1.75289	581
1.75594	519	1.75594	471	1.75594	970	1.75594	620
1.75899	481	1.75899	468	1.75899	1023	1.75899	571
1.76205	513	1.76205	453	1.76205	1042	1.76205	591
1.7651	514	1.7651	418	1.7651	1067	1.7651	600
1.76815	544	1.76815	455	1.76815	1054	1.76815	556
1.77121	536	1.77121	460	1.77121	1048	1.77121	564
1.77426	515	1.77426	458	1.77426	1041	1.77426	619
1.77732	526	1.77732	421	1.77732	974	1.77732	590
1.78037	523	1.78037	432	1.78037	998	1.78037	616
1.78342	492	1.78342	432	1.78342	1045	1.78342	606
1.78648	479	1.78648	436	1.78648	976	1.78648	570
1.78953	473	1.78953	412	1.78953	1022	1.78953	581
1.79258	487	1.79258	403	1.79258	975	1.79258	542
1.79564	505	1.79564	435	1.79564	1006	1.79564	602
1.79869	462	1.79869	410	1.79869	961	1.79869	544
1.80175	498	1.80175	415	1.80175	994	1.80175	560
1.8048	471	1.8048	436	1.8048	962	1.8048	504
1.80785	454	1.80785	457	1.80785	992	1.80785	518
1.81091	432	1.81091	453	1.81091	952	1.81091	576
1.81396	454	1.81396	457	1.81396	895	1.81396	573
1.81702	470	1.81702	410	1.81702	931	1.81702	551
1.82007	502	1.82007	432	1.82007	997	1.82007	527
1.82312	511	1.82312	479	1.82312	961	1.82312	560
1.82618	466	1.82618	412	1.82618	927	1.82618	531
1.82923	427	1.82923	378	1.82923	955	1.82923	473
1.83228	472	1.83228	393	1.83228	934	1.83228	554
1.83534	477	1.83534	433	1.83534	923	1.83534	542
1.83839	460	1.83839	399	1.83839	926	1.83839	508
1.84145	483	1.84145	400	1.84145	974	1.84145	489
1.8445	468	1.8445	391	1.8445	921	1.8445	522
1.84755	445	1.84755	408	1.84755	929	1.84755	563
1.85061	432	1.85061	359	1.85061	946	1.85061	583
1.85366	449	1.85366	408	1.85366	927	1.85366	529
1.85671	424	1.85671	391	1.85671	928	1.85671	502
1.85977	478	1.85977	392	1.85977	912	1.85977	489
1.86282	419	1.86282	432	1.86282	872	1.86282	524
1.86588	454	1.86588	400	1.86588	909	1.86588	499
1.86893	451	1.86893	396	1.86893	864	1.86893	496
1.87198	457	1.87198	381	1.87198	924	1.87198	519
1.87504	427	1.87504	400	1.87504	921	1.87504	472
1.87809	446	1.87809	372	1.87809	916	1.87809	509
1.88115	448	1.88115	431	1.88115	916	1.88115	493
1.8842	473	1.8842	424	1.8842	883	1.8842	478
1.88725	391	1.88725	390	1.88725	846	1.88725	535
1.89031	440	1.89031	392	1.89031	868	1.89031	529
1.89336	419	1.89336	390	1.89336	922	1.89336	499
1.89641	433	1.89641	357	1.89641	901	1.89641	470
1.89947	436	1.89947	406	1.89947	871	1.89947	534
1.90252	434	1.90252	409	1.90252	907	1.90252	520
1.90558	453	1.90558	392	1.90558	874	1.90558	473
1.90863	413	1.90863	385	1.90863	895	1.90863	493
1.91168	398	1.91168	397	1.91168	865	1.91168	488
1.91474	387	1.91474	370	1.91474	898	1.91474	463
1.91779	435	1.91779	379	1.91779	839	1.91779	524
1.92084	416	1.92084	371	1.92084	906	1.92084	449
1.9239	437	1.9239	367	1.9239	916	1.9239	461
1.92695	379	1.92695	359	1.92695	860	1.92695	478
1.93001	385	1.93001	376	1.93001	913	1.93001	455
1.93306	430	1.93306	369	1.93306	885	1.93306	478
1.93611	418	1.93611	376	1.93611	826	1.93611	483
1.93917	439	1.93917	354	1.93917	841	1.93917	478
1.94222	435	1.94222	370	1.94222	840	1.94222	466
1.94528	414	1.94528	342	1.94528	825	1.94528	467
1.94833	429	1.94833	333	1.94833	837	1.94833	475
1.95138	402	1.95138	356	1.95138	852	1.95138	468
1.95444	418	1.95444	373	1.95444	849	1.95444	439
1.95749	388	1.95749	371	1.95749	824	1.95749	461
1.96054	416	1.96054	333	1.96054	819	1.96054	472
1.9636	394	1.9636	353	1.9636	823	1.9636	449
1.96665	390	1.96665	369	1.96665	800	1.96665	477
1.96971	378	1.96971	338	1.96971	774	1.96971	469
1.97276	413	1.97276	362	1.97276	779	1.97276	398
1.97581	372	1.97581	317	1.97581	793	1.97581	433
1.97887	391	1.97887	363	1.97887	873	1.97887	415
1.98192	375	1.98192	361	1.98192	790	1.98192	463
1.98497	412	1.98497	345	1.98497	847	1.98497	423
1.98803	406	1.98803	334	1.98803	811	1.98803	445
1.99108	382	1.99108	334	1.99108	859	1.99108	431
1.99414	387	1.99414	354	1.99414	772	1.99414	445
1.99719	389	1.99719	340	1.99719	796	1.99719	444
2.00024	355	2.00024	324	2.00024	786	2.00024	419
2.0033	419	2.0033	345	2.0033	780	2.0033	424
2.00635	364	2.00635	340	2.00635	779	2.00635	405
2.0094	369	2.0094	295	2.0094	777	2.0094	445
2.01246	333	2.01246	298	2.01246	757	2.01246	407
2.01551	376	2.01551	329	2.01551	741	2.01551	425
2.01857	385	2.01857	316	2.01857	703	2.01857	417
2.02162	364	2.02162	309	2.02162	738	2.02162	387
2.02467	367	2.02467	311	2.02467	760	2.02467	432
2.02773	389	2.02773	329	2.02773	770	2.02773	396
2.03078	331	2.03078	314	2.03078	769	2.03078	425
2.03384	361	2.03384	305	2.03384	793	2.03384	389
2.03689	377	2.03689	333	2.03689	691	2.03689	388
2.03994	378	2.03994	283	2.03994	707	2.03994	403
2.043	345	2.043	292	2.043	745	2.043	367
2.04605	323	2.04605	317	2.04605	730	2.04605	374
2.0491	349	2.0491	302	2.0491	722	2.0491	420
2.05216	324	2.05216	311	2.05216	698	2.05216	390
2.05521	312	2.05521	319	2.05521	749	2.05521	406
2.05827	331	2.05827	305	2.05827	713	2.05827	416
2.06132	353	2.06132	295	2.06132	724	2.06132	388
2.06437	342	2.06437	314	2.06437	690	2.06437	353
2.06743	360	2.06743	302	2.06743	702	2.06743	374
2.07048	342	2.07048	286	2.07048	687	2.07048	390
2.07353	301	2.07353	293	2.07353	710	2.07353	364
2.07659	334	2.07659	324	2.07659	696	2.07659	387
2.07964	336	2.07964	266	2.07964	715	2.07964	378
2.0827	387	2.0827	288	2.0827	734	2.0827	360
2.08575	332	2.08575	266	2.08575	719	2.08575	369
2.0888	335	2.0888	276	2.0888	649	2.0888	346
2.09186	344	2.09186	278	2.09186	675	2.09186	379
2.09491	310	2.09491	287	2.09491	636	2.09491	362
2.09797	324	2.09797	273	2.09797	636	2.09797	388
2.10102	322	2.10102	274	2.10102	692	2.10102	373
2.10407	327	2.10407	299	2.10407	656	2.10407	353
2.10713	338	2.10713	282	2.10713	635	2.10713	376
2.11018	327	2.11018	259	2.11018	668	2.11018	337
2.11323	311	2.11323	278	2.11323	605	2.11323	345
2.11629	316	2.11629	271	2.11629	645	2.11629	334
2.11934	308	2.11934	260	2.11934	635	2.11934	350
2.1224	311	2.1224	267	2.1224	622	2.1224	380
2.12545	302	2.12545	263	2.12545	631	2.12545	359
2.1285	314	2.1285	290	2.1285	665	2.1285	347
2.13156	312	2.13156	276	2.13156	642	2.13156	372
2.13461	305	2.13461	288	2.13461	616	2.13461	348
2.13766	339	2.13766	275	2.13766	591	2.13766	338
2.14072	306	2.14072	285	2.14072	632	2.14072	343
2.14377	303	2.14377	241	2.14377	615	2.14377	337
2.14683	283	2.14683	276	2.14683	633	2.14683	325
2.14988	312	2.14988	301	2.14988	617	2.14988	363
2.15293	288	2.15293	266	2.15293	604	2.15293	329
2.15599	315	2.15599	279	2.15599	598	2.15599	324
2.15904	307	2.15904	266	2.15904	619	2.15904	342
2.1621	282	2.1621	276	2.1621	624	2.1621	320
2.16515	289	2.16515	256	2.16515	588	2.16515	314
2.1682	314	2.1682	241	2.1682	636	2.1682	318
2.17126	267	2.17126	254	2.17126	572	2.17126	333
2.17431	293	2.17431	264	2.17431	644	2.17431	317
2.17736	300	2.17736	260	2.17736	607	2.17736	313
2.18042	303	2.18042	222	2.18042	609	2.18042	324
2.18347	272	2.18347	279	2.18347	570	2.18347	321
2.18653	290	2.18653	242	2.18653	612	2.18653	358
2.18958	287	2.18958	241	2.18958	599	2.18958	318
2.19263	306	2.19263	238	2.19263	592	2.19263	303
2.19569	302	2.19569	280	2.19569	536	2.19569	299
2.19874	288	2.19874	267	2.19874	580	2.19874	312
2.20179	271	2.20179	246	2.20179	583	2.20179	290
2.20485	300	2.20485	248	2.20485	606	2.20485	280
2.2079	272	2.2079	250	2.2079	579	2.2079	304
2.21096	283	2.21096	278	2.21096	556	2.21096	298
2.21401	270	2.21401	243	2.21401	620	2.21401	328
2.21706	297	2.21706	224	2.21706	567	2.21706	301
2.22012	277	2.22012	250	2.22012	555	2.22012	337
2.22317	284	2.22317	253	2.22317	581	2.22317	296
2.22623	285	2.22623	231	2.22623	567	2.22623	311
2.22928	278	2.22928	251	2.22928	578	2.22928	299
2.23233	269	2.23233	249	2.23233	581	2.23233	312
2.23539	269	2.23539	250	2.23539	587	2.23539	304
2.23844	269	2.23844	229	2.23844	577	2.23844	283
2.24149	281	2.24149	252	2.24149	574	2.24149	295
2.24455	272	2.24455	260	2.24455	552	2.24455	267
2.2476	271	2.2476	216	2.2476	547	2.2476	300
2.25066	324	2.25066	243	2.25066	520	2.25066	294
2.25371	273	2.25371	231	2.25371	523	2.25371	282
2.25676	240	2.25676	244	2.25676	551	2.25676	312
2.25982	293	2.25982	229	2.25982	570	2.25982	306
2.26287	273	2.26287	242	2.26287	605	2.26287	282
2.26592	246	2.26592	221	2.26592	551	2.26592	300
2.26898	265	2.26898	229	2.26898	585	2.26898	316
2.27203	261	2.27203	239	2.27203	522	2.27203	293
2.27509	287	2.27509	224	2.27509	508	2.27509	304
2.27814	229	2.27814	234	2.27814	538	2.27814	274
2.28119	283	2.28119	210	2.28119	545	2.28119	300
2.28425	256	2.28425	194	2.28425	546	2.28425	268
2.2873	283	2.2873	210	2.2873	479	2.2873	266
2.29036	279	2.29036	219	2.29036	526	2.29036	279
2.29341	237	2.29341	236	2.29341	582	2.29341	276
2.29646	274	2.29646	216	2.29646	580	2.29646	269
2.29952	260	2.29952	223	2.29952	488	2.29952	294
2.30257	266	2.30257	235	2.30257	537	2.30257	296
2.30562	252	2.30562	202	2.30562	548	2.30562	267
2.30868	255	2.30868	228	2.30868	568	2.30868	292
2.31173	265	2.31173	204	2.31173	530	2.31173	254
2.31479	239	2.31479	208	2.31479	507	2.31479	277
2.31784	235	2.31784	222	2.31784	532	2.31784	266
2.32089	256	2.32089	209	2.32089	483	2.32089	268
2.32395	241	2.32395	219	2.32395	541	2.32395	281
2.327	251	2.327	210	2.327	476	2.327	261
2.33005	257	2.33005	216	2.33005	550	2.33005	273
2.33311	260	2.33311	211	2.33311	508	2.33311	283
2.33616	241	2.33616	210	2.33616	509	2.33616	270
2.33922	255	2.33922	210	2.33922	541	2.33922	268
2.34227	254	2.34227	221	2.34227	504	2.34227	261
2.34532	259	2.34532	213	2.34532	497	2.34532	253
2.34838	232	2.34838	202	2.34838	522	2.34838	276
2.35143	243	2.35143	191	2.35143	544	2.35143	210
2.35449	233	2.35449	230	2.35449	499	2.35449	259
2.35754	245	2.35754	211	2.35754	570	2.35754	263
2.36059	231	2.36059	200	2.36059	504	2.36059	261
2.36365	220	2.36365	226	2.36365	482	2.36365	263
2.3667	250	2.3667	214	2.3667	497	2.3667	250
2.36975	254	2.36975	200	2.36975	509	2.36975	259
2.37281	230	2.37281	207	2.37281	508	2.37281	241
2.37586	225	2.37586	209	2.37586	481	2.37586	260
2.37892	231	2.37892	190	2.37892	483	2.37892	272
2.38197	246	2.38197	192	2.38197	485	2.38197	250
2.38502	237	2.38502	193	2.38502	500	2.38502	224
2.38808	247	2.38808	220	2.38808	522	2.38808	238
2.39113	253	2.39113	225	2.39113	440	2.39113	256
2.39418	244	2.39418	205	2.39418	483	2.39418	240
2.39724	235	2.39724	202	2.39724	478	2.39724	251
2.40029	239	2.40029	180	2.40029	484	2.40029	254
2.40335	241	2.40335	214	2.40335	514	2.40335	281
2.4064	216	2.4064	210	2.4064	506	2.4064	239
2.40945	226	2.40945	188	2.40945	465	2.40945	248
2.41251	210	2.41251	192	2.41251	463	2.41251	217
2.41556	232	2.41556	182	2.41556	486	2.41556	231
2.41862	241	2.41862	202	2.41862	479	2.41862	247
2.42167	213	2.42167	181	2.42167	466	2.42167	252
2.42472	229	2.42472	193	2.42472	489	2.42472	241
2.42778	213	2.42778	180	2.42778	461	2.42778	257
2.43083	227	2.43083	194	2.43083	475	2.43083	224
2.43388	202	2.43388	191	2.43388	457	2.43388	255
2.43694	248	2.43694	172	2.43694	458	2.43694	205
2.43999	229	2.43999	178	2.43999	474	2.43999	271
2.44305	215	2.44305	194	2.44305	477	2.44305	242
2.4461	239	2.4461	210	2.4461	461	2.4461	263
2.44915	195	2.44915	186	2.44915	457	2.44915	242
2.45221	202	2.45221	189	2.45221	431	2.45221	232
2.45526	224	2.45526	194	2.45526	429	2.45526	235
2.45831	209	2.45831	210	2.45831	450	2.45831	240
2.46137	194	2.46137	197	2.46137	415	2.46137	227
2.46442	225	2.46442	171	2.46442	407	2.46442	221
2.46748	221	2.46748	171	2.46748	408	2.46748	213
2.47053	225	2.47053	219	2.47053	456	2.47053	220
2.47358	208	2.47358	172	2.47358	459	2.47358	240
2.47664	198	2.47664	176	2.47664	438	2.47664	226
2.47969	232	2.47969	206	2.47969	466	2.47969	226
2.48275	220	2.48275	188	2.48275	472	2.48275	231
2.4858	223	2.4858	173	2.4858	460	2.4858	245
2.48885	204	2.48885	170	2.48885	458	2.48885	217
2.49191	209	2.49191	199	2.49191	443	2.49191	243
2.49496	207	2.49496	178	2.49496	410	2.49496	228
2.49801	223	2.49801	173	2.49801	412	2.49801	220
2.50107	195	2.50107	184	2.50107	432	2.50107	219
2.50412	198	2.50412	148	2.50412	425	2.50412	219
2.50718	195	2.50718	200	2.50718	387	2.50718	213
2.51023	173	2.51023	183	2.51023	407	2.51023	223
2.51328	219	2.51328	171	2.51328	461	2.51328	216
2.51634	223	2.51634	183	2.51634	407	2.51634	206
2.51939	198	2.51939	168	2.51939	404	2.51939	231
2.52244	223	2.52244	144	2.52244	412	2.52244	211
2.5255	193	2.5255	168	2.5255	418	2.5255	228
2.52855	223	2.52855	170	2.52855	383	2.52855	198
2.53161	197	2.53161	177	2.53161	449	2.53161	231
2.53466	200	2.53466	155	2.53466	451	2.53466	216
2.53771	175	2.53771	173	2.53771	433	2.53771	210
2.54077	182	2.54077	172	2.54077	387	2.54077	228
2.54382	215	2.54382	168	2.54382	458	2.54382	220
2.54688	215	2.54688	153	2.54688	412	2.54688	208
2.54993	200	2.54993	178	2.54993	376	2.54993	217
2.55298	197	2.55298	156	2.55298	416	2.55298	203
2.55604	187	2.55604	158	2.55604	406	2.55604	191
2.55909	220	2.55909	167	2.55909	384	2.55909	215
2.56214	206	2.56214	179	2.56214	390	2.56214	183
2.5652	184	2.5652	178	2.5652	404	2.5652	219
2.56825	216	2.56825	189	2.56825	362	2.56825	203
2.57131	200	2.57131	167	2.57131	409	2.57131	220
2.57436	196	2.57436	165	2.57436	412	2.57436	202
2.57741	226	2.57741	194	2.57741	400	2.57741	225
2.58047	224	2.58047	151	2.58047	428	2.58047	181
2.58352	201	2.58352	175	2.58352	394	2.58352	179
2.58657	187	2.58657	172	2.58657	405	2.58657	186
2.58963	188	2.58963	156	2.58963	382	2.58963	211
2.59268	204	2.59268	166	2.59268	386	2.59268	212
2.59574	188	2.59574	173	2.59574	373	2.59574	191
2.59879	220	2.59879	145	2.59879	385	2.59879	177
2.60184	179	2.60184	177	2.60184	402	2.60184	191
2.6049	211	2.6049	151	2.6049	394	2.6049	192
2.60795	192	2.60795	131	2.60795	419	2.60795	179
2.611	173	2.611	160	2.611	426	2.611	217
2.61406	193	2.61406	168	2.61406	374	2.61406	197
2.61711	183	2.61711	154	2.61711	343	2.61711	175
2.62017	176	2.62017	153	2.62017	392	2.62017	218
2.62322	212	2.62322	152	2.62322	384	2.62322	208
2.62627	187	2.62627	172	2.62627	395	2.62627	207
2.62933	191	2.62933	155	2.62933	375	2.62933	206
2.63238	187	2.63238	151	2.63238	383	2.63238	191
2.63544	182	2.63544	143	2.63544	365	2.63544	186
2.63849	190	2.63849	148	2.63849	344	2.63849	195
2.64154	205	2.64154	142	2.64154	391	2.64154	192
2.6446	182	2.6446	137	2.6446	377	2.6446	177
2.64765	185	2.64765	151	2.64765	389	2.64765	194
2.6507	154	2.6507	151	2.6507	400	2.6507	177
2.65376	175	2.65376	158	2.65376	351	2.65376	198
2.65681	199	2.65681	144	2.65681	364	2.65681	187
2.65987	177	2.65987	167	2.65987	367	2.65987	191
2.66292	191	2.66292	160	2.66292	376	2.66292	190
2.66597	187	2.66597	172	2.66597	320	2.66597	175
2.66903	189	2.66903	149	2.66903	345	2.66903	176
2.67208	165	2.67208	145	2.67208	359	2.67208	195
2.67513	177	2.67513	143	2.67513	365	2.67513	200
2.67819	155	2.67819	164	2.67819	412	2.67819	170
2.68124	186	2.68124	126	2.68124	355	2.68124	194
2.6843	177	2.6843	159	2.6843	371	2.6843	191
2.68735	155	2.68735	150	2.68735	354	2.68735	175
2.6904	175	2.6904	145	2.6904	350	2.6904	187
2.69346	172	2.69346	154	2.69346	353	2.69346	189
2.69651	166	2.69651	157	2.69651	380	2.69651	176
2.69957	159	2.69957	144	2.69957	373	2.69957	181
2.70262	171	2.70262	157	2.70262	376	2.70262	169
2.70567	174	2.70567	169	2.70567	346	2.70567	158
2.70873	176	2.70873	129	2.70873	365	2.70873	178
2.71178	185	2.71178	149	2.71178	352	2.71178	160
2.71483	179	2.71483	154	2.71483	344	2.71483	155
2.71789	152	2.71789	138	2.71789	348	2.71789	167
2.72094	148	2.72094	165	2.72094	359	2.72094	192
2.724	152	2.724	138	2.724	348	2.724	163
2.72705	152	2.72705	161	2.72705	354	2.72705	170
2.7301	208	2.7301	137	2.7301	350	2.7301	185
2.73316	167	2.73316	147	2.73316	329	2.73316	169
2.73621	136	2.73621	158	2.73621	368	2.73621	151
2.73926	160	2.73926	137	2.73926	370	2.73926	188
2.74232	145	2.74232	155	2.74232	377	2.74232	168
2.74537	147	2.74537	119	2.74537	343	2.74537	182
2.74843	145	2.74843	155	2.74843	396	2.74843	173
2.75148	171	2.75148	144	2.75148	322	2.75148	167
2.75453	133	2.75453	140	2.75453	373	2.75453	168
2.75759	164	2.75759	139	2.75759	339	2.75759	152
2.76064	171	2.76064	135	2.76064	328	2.76064	161
2.7637	181	2.7637	147	2.7637	355	2.7637	171
2.76675	170	2.76675	136	2.76675	348	2.76675	190
2.7698	156	2.7698	148	2.7698	333	2.7698	167
2.77286	188	2.77286	128	2.77286	316	2.77286	165
2.77591	165	2.77591	126	2.77591	340	2.77591	163
2.77896	144	2.77896	107	2.77896	329	2.77896	149
2.78202	156	2.78202	117	2.78202	358	2.78202	157
2.78507	168	2.78507	125	2.78507	311	2.78507	153
2.78813	152	2.78813	120	2.78813	292	2.78813	180
2.79118	151	2.79118	139	2.79118	297	2.79118	183
2.79423	153	2.79423	140	2.79423	312	2.79423	159
2.79729	146	2.79729	130	2.79729	317	2.79729	154
2.80034	137	2.80034	130	2.80034	326	2.80034	167
2.80339	133	2.80339	124	2.80339	298	2.80339	154
2.80645	136	2.80645	149	2.80645	321	2.80645	168
2.8095	136	2.8095	143	2.8095	304	2.8095	185
2.81256	159	2.81256	112	2.81256	306	2.81256	153
2.81561	147	2.81561	138	2.81561	327	2.81561	179
2.81866	149	2.81866	119	2.81866	296	2.81866	150
2.82172	173	2.82172	108	2.82172	322	2.82172	133
2.82477	144	2.82477	132	2.82477	329	2.82477	160
2.82783	143	2.82783	124	2.82783	300	2.82783	159
2.83088	136	2.83088	105	2.83088	305	2.83088	167
2.83393	144	2.83393	121	2.83393	299	2.83393	157
2.83699	162	2.83699	111	2.83699	330	2.83699	146
2.84004	163	2.84004	128	2.84004	297	2.84004	160
2.84309	151	2.84309	133	2.84309	302	2.84309	177
2.84615	123	2.84615	137	2.84615	281	2.84615	145
2.8492	146	2.8492	116	2.8492	322	2.8492	143
2.85226	140	2.85226	104	2.85226	296	2.85226	148
2.85531	133	2.85531	115	2.85531	273	2.85531	138
2.85836	144	2.85836	118	2.85836	276	2.85836	148
2.86142	153	2.86142	150	2.86142	290	2.86142	148
2.86447	151	2.86447	113	2.86447	335	2.86447	128
2.86752	142	2.86752	114	2.86752	325	2.86752	123
2.87058	124	2.87058	112	2.87058	295	2.87058	137
2.87363	154	2.87363	99	2.87363	315	2.87363	132
2.87669	157	2.87669	131	2.87669	295	2.87669	133
2.87974	145	2.87974	123	2.87974	298	2.87974	131
2.88279	148	2.88279	136	2.88279	301	2.88279	150
2.88585	137	2.88585	111	2.88585	262	2.88585	133
2.8889	155	2.8889	141	2.8889	298	2.8889	135
2.89196	149	2.89196	103	2.89196	268	2.89196	165
2.89501	145	2.89501	116	2.89501	292	2.89501	139
2.89806	131	2.89806	110	2.89806	294	2.89806	125
2.90112	137	2.90112	125	2.90112	263	2.90112	138
2.90417	135	2.90417	114	2.90417	277	2.90417	148
2.90722	144	2.90722	110	2.90722	258	2.90722	146
2.91028	134	2.91028	126	2.91028	297	2.91028	137
2.91333	138	2.91333	130	2.91333	266	2.91333	133
2.91639	136	2.91639	133	2.91639	280	2.91639	119
2.91944	119	2.91944	104	2.91944	270	2.91944	148
2.92249	125	2.92249	106	2.92249	279	2.92249	149
2.92555	150	2.92555	107	2.92555	293	2.92555	139
2.9286	146	2.9286	134	2.9286	273	2.9286	126
2.93165	114	2.93165	121	2.93165	260	2.93165	141
2.93471	137	2.93471	114	2.93471	271	2.93471	141
2.93776	137	2.93776	118	2.93776	261	2.93776	147
2.94082	127	2.94082	125	2.94082	270	2.94082	131
2.94387	128	2.94387	107	2.94387	253	2.94387	138
2.94692	127	2.94692	123	2.94692	257	2.94692	138
2.94998	141	2.94998	128	2.94998	298	2.94998	136
2.95303	135	2.95303	112	2.95303	247	2.95303	142
2.95609	118	2.95609	112	2.95609	267	2.95609	144
2.95914	141	2.95914	119	2.95914	282	2.95914	148
2.96219	124	2.96219	113	2.96219	254	2.96219	138
2.96525	123	2.96525	108	2.96525	298	2.96525	144
2.9683	126	2.9683	111	2.9683	282	2.9683	143
2.97135	134	2.97135	118	2.97135	251	2.97135	127
2.97441	126	2.97441	110	2.97441	258	2.97441	141
2.97746	170	2.97746	121	2.97746	298	2.97746	141
2.98052	113	2.98052	136	2.98052	287	2.98052	140
2.98357	142	2.98357	107	2.98357	283	2.98357	108
2.98662	138	2.98662	116	2.98662	275	2.98662	139
2.98968	137	2.98968	110	2.98968	258	2.98968	118
2.99273	141	2.99273	108	2.99273	282	2.99273	122
2.99578	124	2.99578	119	2.99578	308	2.99578	123
2.99884	119	2.99884	102	2.99884	260	2.99884	137
3.00189	139	3.00189	117	3.00189	238	3.00189	133
3.00495	128	3.00495	129	3.00495	262	3.00495	114
3.008	139	3.008	100	3.008	225	3.008	126
3.01105	113	3.01105	95	3.01105	245	3.01105	115
3.01411	112	3.01411	94	3.01411	246	3.01411	117
3.01716	139	3.01716	111	3.01716	258	3.01716	118
3.02022	109	3.02022	122	3.02022	256	3.02022	117
3.02327	137	3.02327	117	3.02327	258	3.02327	120
3.02632	136	3.02632	94	3.02632	251	3.02632	136
3.02938	121	3.02938	116	3.02938	247	3.02938	122
3.03243	135	3.03243	130	3.03243	249	3.03243	116
3.03548	110	3.03548	112	3.03548	247	3.03548	122
3.03854	117	3.03854	143	3.03854	226	3.03854	137
3.04159	128	3.04159	123	3.04159	261	3.04159	111
3.04465	138	3.04465	101	3.04465	286	3.04465	118
3.0477	112	3.0477	115	3.0477	250	3.0477	114
3.05075	129	3.05075	110	3.05075	254	3.05075	128
3.05381	121	3.05381	85	3.05381	239	3.05381	126
3.05686	142	3.05686	112	3.05686	276	3.05686	122
3.05991	107	3.05991	111	3.05991	257	3.05991	114
3.06297	103	3.06297	103	3.06297	257	3.06297	124
3.06602	126	3.06602	102	3.06602	253	3.06602	123
3.06908	124	3.06908	100	3.06908	265	3.06908	103
3.07213	124	3.07213	106	3.07213	252	3.07213	131
3.07518	131	3.07518	99	3.07518	240	3.07518	115
3.07824	118	3.07824	90	3.07824	239	3.07824	119
3.08129	141	3.08129	95	3.08129	235	3.08129	112
3.08435	102	3.08435	87	3.08435	235	3.08435	135
3.0874	117	3.0874	106	3.0874	246	3.0874	124
3.09045	128	3.09045	102	3.09045	265	3.09045	142
3.09351	117	3.09351	95	3.09351	224	3.09351	105
3.09656	116	3.09656	91	3.09656	258	3.09656	128
3.09961	118	3.09961	84	3.09961	232	3.09961	114
3.10267	123	3.10267	97	3.10267	226	3.10267	125
3.10572	119	3.10572	94	3.10572	213	3.10572	107
3.10878	126	3.10878	116	3.10878	242	3.10878	109
3.11183	123	3.11183	74	3.11183	284	3.11183	114
3.11488	108	3.11488	97	3.11488	225	3.11488	99
3.11794	104	3.11794	101	3.11794	247	3.11794	131
3.12099	114	3.12099	83	3.12099	251	3.12099	104
3.12404	122	3.12404	83	3.12404	245	3.12404	136
3.1271	122	3.1271	117	3.1271	219	3.1271	116
3.13015	133	3.13015	118	3.13015	217	3.13015	125
3.13321	110	3.13321	109	3.13321	219	3.13321	98
3.13626	101	3.13626	82	3.13626	216	3.13626	98
3.13931	122	3.13931	101	3.13931	220	3.13931	132
3.14237	113	3.14237	95	3.14237	222	3.14237	107
3.14542	133	3.14542	106	3.14542	225	3.14542	108
3.14847	112	3.14847	91	3.14847	232	3.14847	102
3.15153	112	3.15153	97	3.15153	255	3.15153	102
3.15458	117	3.15458	96	3.15458	215	3.15458	101
3.15764	116	3.15764	84	3.15764	229	3.15764	124
3.16069	129	3.16069	100	3.16069	211	3.16069	111
3.16374	119	3.16374	97	3.16374	223	3.16374	120
3.1668	112	3.1668	106	3.1668	223	3.1668	116
3.16985	113	3.16985	81	3.16985	224	3.16985	117
3.17291	115	3.17291	92	3.17291	229	3.17291	109
3.17596	116	3.17596	90	3.17596	219	3.17596	112
3.17901	110	3.17901	93	3.17901	220	3.17901	105
3.18207	101	3.18207	95	3.18207	247	3.18207	93
3.18512	120	3.18512	92	3.18512	214	3.18512	118
3.18817	107	3.18817	88	3.18817	226	3.18817	114
3.19123	102	3.19123	106	3.19123	245	3.19123	108
3.19428	97	3.19428	101	3.19428	208	3.19428	109
3.19734	131	3.19734	94	3.19734	235	3.19734	112
3.20039	84	3.20039	74	3.20039	237	3.20039	84
3.20344	120	3.20344	88	3.20344	207	3.20344	104
3.2065	111	3.2065	98	3.2065	208	3.2065	101
3.20955	104	3.20955	92	3.20955	224	3.20955	95
3.2126	111	3.2126	101	3.2126	204	3.2126	104
3.21566	116	3.21566	87	3.21566	206	3.21566	89
3.21871	122	3.21871	94	3.21871	224	3.21871	116
3.22177	124	3.22177	96	3.22177	208	3.22177	95
3.22482	104	3.22482	90	3.22482	226	3.22482	99
3.22787	118	3.22787	76	3.22787	234	3.22787	103
3.23093	105	3.23093	118	3.23093	223	3.23093	101
3.23398	94	3.23398	95	3.23398	226	3.23398	111
3.23704	108	3.23704	100	3.23704	224	3.23704	86
3.24009	128	3.24009	95	3.24009	199	3.24009	113
3.24314	120	3.24314	96	3.24314	194	3.24314	103
3.2462	113	3.2462	71	3.2462	242	3.2462	104
3.24925	105	3.24925	96	3.24925	214	3.24925	107
3.2523	101	3.2523	76	3.2523	207	3.2523	102
3.25536	111	3.25536	91	3.25536	207	3.25536	105
3.25841	104	3.25841	92	3.25841	203	3.25841	102
3.26147	100	3.26147	96	3.26147	208	3.26147	100
3.26452	106	3.26452	76	3.26452	187	3.26452	111
3.26757	109	3.26757	93	3.26757	217	3.26757	87
3.27063	93	3.27063	70	3.27063	185	3.27063	96
3.27368	117	3.27368	76	3.27368	226	3.27368	103
3.27673	107	3.27673	79	3.27673	186	3.27673	95
3.27979	107	3.27979	81	3.27979	211	3.27979	95
3.28284	101	3.28284	83	3.28284	205	3.28284	84
3.2859	105	3.2859	83	3.2859	215	3.2859	97
3.28895	85	3.28895	86	3.28895	197	3.28895	83
3.292	101	3.292	82	3.292	187	3.292	88
3.29506	103	3.29506	86	3.29506	176	3.29506	104
3.29811	115	3.29811	92	3.29811	202	3.29811	90
3.30117	105	3.30117	70	3.30117	190	3.30117	97
3.30422	99	3.30422	92	3.30422	224	3.30422	89
3.30727	113	3.30727	92	3.30727	203	3.30727	81
3.31033	99	3.31033	87	3.31033	209	3.31033	109
3.31338	97	3.31338	83	3.31338	193	3.31338	104
3.31643	91	3.31643	91	3.31643	205	3.31643	93
3.31949	94	3.31949	76	3.31949	203	3.31949	80
3.32254	87	3.32254	70	3.32254	193	3.32254	104
3.3256	98	3.3256	90	3.3256	211	3.3256	91
3.32865	107	3.32865	79	3.32865	208	3.32865	105
3.3317	108	3.3317	70	3.3317	189	3.3317	103
3.33476	101	3.33476	66	3.33476	202	3.33476	77
3.33781	98	3.33781	87	3.33781	210	3.33781	87
3.34086	110	3.34086	85	3.34086	179	3.34086	86
3.34392	97	3.34392	76	3.34392	205	3.34392	102
3.34697	92	3.34697	72	3.34697	181	3.34697	83
3.35003	91	3.35003	74	3.35003	174	3.35003	89
3.35308	95	3.35308	71	3.35308	203	3.35308	80
3.35613	92	3.35613	74	3.35613	191	3.35613	76
3.35919	114	3.35919	85	3.35919	203	3.35919	81
3.36224	93	3.36224	66	3.36224	195	3.36224	71
3.3653	80	3.3653	69	3.3653	180	3.3653	88
3.36835	86	3.36835	80	3.36835	191	3.36835	97
3.3714	83	3.3714	67	3.3714	205	3.3714	107
3.37446	83	3.37446	103	3.37446	185	3.37446	88
3.37751	96	3.37751	80	3.37751	184	3.37751	95
3.38056	83	3.38056	94	3.38056	187	3.38056	75
3.38362	114	3.38362	87	3.38362	197	3.38362	85
3.38667	98	3.38667	97	3.38667	194	3.38667	94
3.38973	108	3.38973	65	3.38973	175	3.38973	86
3.39278	85	3.39278	85	3.39278	181	3.39278	92
3.39583	87	3.39583	65	3.39583	159	3.39583	86
3.39889	72	3.39889	93	3.39889	176	3.39889	78
3.40194	102	3.40194	71	3.40194	181	3.40194	87
3.40499	86	3.40499	89	3.40499	179	3.40499	83
3.40805	83	3.40805	80	3.40805	185	3.40805	85
3.4111	79	3.4111	73	3.4111	174	3.4111	82
3.41416	92	3.41416	70	3.41416	204	3.41416	84
3.41721	92	3.41721	88	3.41721	191	3.41721	93
3.42026	81	3.42026	87	3.42026	170	3.42026	71
3.42332	96	3.42332	78	3.42332	175	3.42332	80
3.42637	95	3.42637	76	3.42637	218	3.42637	99
3.42943	91	3.42943	90	3.42943	193	3.42943	91
3.43248	99	3.43248	76	3.43248	178	3.43248	92
3.43553	87	3.43553	86	3.43553	161	3.43553	86
3.43859	91	3.43859	54	3.43859	183	3.43859	87
3.44164	93	3.44164	77	3.44164	178	3.44164	95
3.44469	100	3.44469	69	3.44469	184	3.44469	89
3.44775	87	3.44775	90	3.44775	187	3.44775	75
3.4508	113	3.4508	78	3.4508	165	3.4508	79
3.45386	92	3.45386	76	3.45386	183	3.45386	86
3.45691	76	3.45691	75	3.45691	164	3.45691	83
3.45996	96	3.45996	81	3.45996	158	3.45996	70
3.46302	67	3.46302	58	3.46302	177	3.46302	82
3.46607	87	3.46607	80	3.46607	181	3.46607	87
3.46912	85	3.46912	76	3.46912	162	3.46912	73
3.47218	86	3.47218	69	3.47218	187	3.47218	81
3.47523	92	3.47523	83	3.47523	168	3.47523	75
3.47829	86	3.47829	66	3.47829	145	3.47829	84
3.48134	95	3.48134	60	3.48134	174	3.48134	85
3.48439	74	3.48439	80	3.48439	175	3.48439	79
3.48745	87	3.48745	62	3.48745	168	3.48745	84
3.4905	110	3.4905	71	3.4905	171	3.4905	86
3.49356	72	3.49356	65	3.49356	176	3.49356	89
3.49661	85	3.49661	87	3.49661	197	3.49661	79
3.49966	95	3.49966	72	3.49966	179	3.49966	72
3.50272	86	3.50272	72	3.50272	159	3.50272	88
3.50577	80	3.50577	55	3.50577	167	3.50577	79
3.50882	85	3.50882	76	3.50882	150	3.50882	63
3.51188	100	3.51188	73	3.51188	170	3.51188	69
3.51493	95	3.51493	85	3.51493	165	3.51493	96
3.51799	76	3.51799	77	3.51799	165	3.51799	87
3.52104	85	3.52104	85	3.52104	175	3.52104	67
3.52409	88	3.52409	79	3.52409	183	3.52409	73
3.52715	94	3.52715	64	3.52715	158	3.52715	81
3.5302	73	3.5302	77	3.5302	172	3.5302	88
3.53325	83	3.53325	65	3.53325	173	3.53325	76
3.53631	84	3.53631	67	3.53631	170	3.53631	98
3.53936	66	3.53936	70	3.53936	156	3.53936	85
3.54242	100	3.54242	72	3.54242	166	3.54242	77
3.54547	95	3.54547	69	3.54547	155	3.54547	67
3.54852	91	3.54852	61	3.54852	164	3.54852	82
3.55158	77	3.55158	70	3.55158	192	3.55158	87
3.55463	70	3.55463	66	3.55463	155	3.55463	69
3.55769	78	3.55769	76	3.55769	151	3.55769	73
3.56074	83	3.56074	80	3.56074	197	3.56074	85
3.56379	82	3.56379	72	3.56379	168	3.56379	80
3.56685	75	3.56685	67	3.56685	151	3.56685	77
3.5699	70	3.5699	64	3.5699	188	3.5699	86
3.57295	82	3.57295	82	3.57295	166	3.57295	70
3.57601	90	3.57601	72	3.57601	173	3.57601	75
3.57906	92	3.57906	65	3.57906	164	3.57906	89
3.58212	76	3.58212	67	3.58212	166	3.58212	64
3.58517	73	3.58517	71	3.58517	168	3.58517	73
3.58822	76	3.58822	85	3.58822	146	3.58822	66
3.59128	89	3.59128	75	3.59128	179	3.59128	92
3.59433	87	3.59433	71	3.59433	175	3.59433	76
3.59738	86	3.59738	74	3.59738	174	3.59738	70
3.60044	76	3.60044	66	3.60044	151	3.60044	77
3.60349	67	3.60349	64	3.60349	187	3.60349	92
3.60655	75	3.60655	65	3.60655	148	3.60655	82
3.6096	72	3.6096	65	3.6096	139	3.6096	79
3.61265	80	3.61265	83	3.61265	161	3.61265	77
3.61571	89	3.61571	62	3.61571	180	3.61571	71
3.61876	77	3.61876	69	3.61876	155	3.61876	77
3.62182	69	3.62182	75	3.62182	164	3.62182	99
3.62487	85	3.62487	76	3.62487	176	3.62487	76
3.62792	78	3.62792	66	3.62792	165	3.62792	64
3.63098	64	3.63098	64	3.63098	138	3.63098	47
3.63403	68	3.63403	58	3.63403	180	3.63403	71
3.63708	66	3.63708	69	3.63708	139	3.63708	68
3.64014	83	3.64014	74	3.64014	152	3.64014	62
3.64319	70	3.64319	78	3.64319	156	3.64319	82
3.64625	73	3.64625	69	3.64625	168	3.64625	80
3.6493	76	3.6493	69	3.6493	161	3.6493	76
3.65235	69	3.65235	74	3.65235	165	3.65235	72
3.65541	106	3.65541	70	3.65541	152	3.65541	79
3.65846	79	3.65846	81	3.65846	157	3.65846	65
3.66151	79	3.66151	70	3.66151	149	3.66151	68
3.66457	86	3.66457	68	3.66457	162	3.66457	75
3.66762	84	3.66762	63	3.66762	174	3.66762	76
3.67068	84	3.67068	56	3.67068	142	3.67068	71
3.67373	68	3.67373	85	3.67373	165	3.67373	67
3.67678	76	3.67678	60	3.67678	146	3.67678	73
3.67984	65	3.67984	68	3.67984	157	3.67984	73
3.68289	83	3.68289	39	3.68289	148	3.68289	72
3.68594	84	3.68594	76	3.68594	152	3.68594	65
3.689	82	3.689	65	3.689	140	3.689	85
3.69205	91	3.69205	68	3.69205	153	3.69205	64
3.69511	97	3.69511	66	3.69511	142	3.69511	65
3.69816	79	3.69816	54	3.69816	158	3.69816	68
3.70121	81	3.70121	64	3.70121	145	3.70121	89
3.70427	80	3.70427	61	3.70427	163	3.70427	72
3.70732	88	3.70732	58	3.70732	150	3.70732	66
3.71038	76	3.71038	50	3.71038	145	3.71038	73
3.71343	71	3.71343	82	3.71343	155	3.71343	70
3.71648	73	3.71648	65	3.71648	160	3.71648	83
3.71954	66	3.71954	62	3.71954	145	3.71954	70
3.72259	81	3.72259	64	3.72259	166	3.72259	77
3.72564	85	3.72564	73	3.72564	171	3.72564	75
3.7287	77	3.7287	70	3.7287	136	3.7287	58
3.73175	79	3.73175	64	3.73175	156	3.73175	57
3.73481	77	3.73481	53	3.73481	145	3.73481	59
3.73786	83	3.73786	68	3.73786	146	3.73786	78
3.74091	66	3.74091	61	3.74091	158	3.74091	69
3.74397	76	3.74397	55	3.74397	124	3.74397	60
3.74702	50	3.74702	70	3.74702	144	3.74702	69
3.75007	82	3.75007	57	3.75007	136	3.75007	78
3.75313	75	3.75313	63	3.75313	139	3.75313	67
3.75618	90	3.75618	56	3.75618	140	3.75618	65
3.75924	64	3.75924	54	3.75924	140	3.75924	59
3.76229	69	3.76229	58	3.76229	146	3.76229	64
3.76534	58	3.76534	64	3.76534	139	3.76534	71
3.7684	49	3.7684	61	3.7684	148	3.7684	71
3.77145	74	3.77145	58	3.77145	133	3.77145	62
3.77451	63	3.77451	74	3.77451	144	3.77451	67
3.77756	89	3.77756	64	3.77756	144	3.77756	64
3.78061	59	3.78061	52	3.78061	155	3.78061	65
3.78367	66	3.78367	68	3.78367	139	3.78367	54
3.78672	68	3.78672	58	3.78672	127	3.78672	67
3.78977	74	3.78977	57	3.78977	152	3.78977	74
3.79283	63	3.79283	63	3.79283	154	3.79283	55
3.79588	74	3.79588	66	3.79588	129	3.79588	59
3.79894	58	3.79894	58	3.79894	148	3.79894	70
3.80199	66	3.80199	49	3.80199	141	3.80199	61
3.80504	71	3.80504	59	3.80504	133	3.80504	67
3.8081	66	3.8081	52	3.8081	154	3.8081	70
3.81115	71	3.81115	55	3.81115	140	3.81115	73
3.8142	65	3.8142	63	3.8142	128	3.8142	62
3.81726	68	3.81726	44	3.81726	142	3.81726	86
3.82031	81	3.82031	62	3.82031	141	3.82031	63
3.82337	86	3.82337	47	3.82337	143	3.82337	55
3.82642	80	3.82642	63	3.82642	151	3.82642	70
3.82947	70	3.82947	47	3.82947	146	3.82947	65
3.83253	89	3.83253	64	3.83253	145	3.83253	60
3.83558	73	3.83558	59	3.83558	146	3.83558	52
3.83864	78	3.83864	62	3.83864	132	3.83864	70
3.84169	53	3.84169	57	3.84169	144	3.84169	55
3.84474	55	3.84474	69	3.84474	154	3.84474	48
3.8478	70	3.8478	57	3.8478	135	3.8478	51
3.85085	60	3.85085	56	3.85085	123	3.85085	61
3.8539	75	3.8539	78	3.8539	142	3.8539	73
3.85696	70	3.85696	52	3.85696	141	3.85696	55
3.86001	66	3.86001	68	3.86001	132	3.86001	66
3.86307	66	3.86307	55	3.86307	134	3.86307	67
3.86612	59	3.86612	67	3.86612	127	3.86612	67
3.86917	54	3.86917	54	3.86917	126	3.86917	68
3.87223	73	3.87223	59	3.87223	117	3.87223	55
3.87528	62	3.87528	56	3.87528	137	3.87528	66
3.87833	65	3.87833	52	3.87833	146	3.87833	55
3.88139	63	3.88139	66	3.88139	155	3.88139	69
3.88444	72	3.88444	63	3.88444	134	3.88444	58
3.8875	52	3.8875	63	3.8875	127	3.8875	51
3.89055	83	3.89055	50	3.89055	154	3.89055	58
3.8936	77	3.8936	70	3.8936	130	3.8936	53
3.89666	55	3.89666	45	3.89666	134	3.89666	53
3.89971	70	3.89971	72	3.89971	131	3.89971	70
3.90277	62	3.90277	60	3.90277	118	3.90277	58
3.90582	66	3.90582	58	3.90582	126	3.90582	37
3.90887	65	3.90887	56	3.90887	119	3.90887	45
3.91193	56	3.91193	66	3.91193	143	3.91193	58
3.91498	69	3.91498	62	3.91498	131	3.91498	69
3.91803	61	3.91803	50	3.91803	135	3.91803	63
3.92109	72	3.92109	47	3.92109	137	3.92109	67
3.92414	66	3.92414	64	3.92414	145	3.92414	56
3.9272	68	3.9272	56	3.9272	119	3.9272	56
3.93025	47	3.93025	52	3.93025	124	3.93025	43
3.9333	73	3.9333	55	3.9333	126	3.9333	58
3.93636	47	3.93636	60	3.93636	121	3.93636	57
3.93941	61	3.93941	49	3.93941	150	3.93941	66
3.94246	68	3.94246	69	3.94246	114	3.94246	56
3.94552	60	3.94552	50	3.94552	125	3.94552	60
3.94857	58	3.94857	63	3.94857	119	3.94857	60
3.95163	76	3.95163	53	3.95163	120	3.95163	54
3.95468	71	3.95468	51	3.95468	133	3.95468	54
3.95773	63	3.95773	56	3.95773	133	3.95773	64
3.96079	63	3.96079	52	3.96079	115	3.96079	63
3.96384	71	3.96384	50	3.96384	128	3.96384	46
3.9669	61	3.9669	53	3.9669	122	3.9669	54
3.96995	62	3.96995	45	3.96995	111	3.96995	48
3.973	61	3.973	65	3.973	136	3.973	58
3.97606	80	3.97606	64	3.97606	122	3.97606	51
3.97911	66	3.97911	45	3.97911	131	3.97911	57
3.98216	67	3.98216	50	3.98216	112	3.98216	61
3.98522	66	3.98522	64	3.98522	142	3.98522	54
3.98827	70	3.98827	57	3.98827	126	3.98827	64
3.99133	67	3.99133	55	3.99133	131	3.99133	52
3.99438	73	3.99438	63	3.99438	121	3.99438	58
3.99743	60	3.99743	55	3.99743	112	3.99743	59
4.00049	73	4.00049	55	4.00049	140	4.00049	59
4.00354	48	4.00354	63	4.00354	120	4.00354	62
4.00659	68	4.00659	49	4.00659	128	4.00659	57
4.00965	61	4.00965	51	4.00965	115	4.00965	64
4.0127	64	4.0127	60	4.0127	131	4.0127	56
4.01576	62	4.01576	51	4.01576	103	4.01576	39
4.01881	67	4.01881	54	4.01881	111	4.01881	66
4.02186	57	4.02186	63	4.02186	105	4.02186	58
4.02492	62	4.02492	57	4.02492	106	4.02492	51
4.02797	55	4.02797	45	4.02797	123	4.02797	60
4.03103	61	4.03103	52	4.03103	111	4.03103	49
4.03408	54	4.03408	62	4.03408	121	4.03408	57
4.03713	59	4.03713	43	4.03713	101	4.03713	43
4.04019	84	4.04019	62	4.04019	129	4.04019	54
4.04324	52	4.04324	51	4.04324	120	4.04324	51
4.04629	55	4.04629	58	4.04629	119	4.04629	54
4.04935	60	4.04935	54	4.04935	127	4.04935	43
4.0524	65	4.0524	45	4.0524	112	4.0524	43
4.05546	57	4.05546	67	4.05546	116	4.05546	76
4.05851	55	4.05851	53	4.05851	96	4.05851	60
4.06156	55	4.06156	62	4.06156	123	4.06156	54
4.06462	48	4.06462	40	4.06462	111	4.06462	50
4.06767	68	4.06767	46	4.06767	130	4.06767	59
4.07072	70	4.07072	53	4.07072	127	4.07072	51
4.07378	62	4.07378	59	4.07378	127	4.07378	48
4.07683	61	4.07683	46	4.07683	132	4.07683	61
4.07989	60	4.07989	61	4.07989	115	4.07989	51
4.08294	46	4.08294	52	4.08294	115	4.08294	60
4.08599	48	4.08599	46	4.08599	108	4.08599	55
4.08905	50	4.08905	46	4.08905	107	4.08905	48
4.0921	63	4.0921	49	4.0921	112	4.0921	60
4.09516	63	4.09516	50	4.09516	125	4.09516	49
4.09821	66	4.09821	53	4.09821	125	4.09821	55
4.10126	55	4.10126	40	4.10126	112	4.10126	55
4.10432	67	4.10432	55	4.10432	110	4.10432	61
4.10737	57	4.10737	47	4.10737	120	4.10737	53
4.11042	60	4.11042	61	4.11042	109	4.11042	50
4.11348	48	4.11348	49	4.11348	121	4.11348	61
4.11653	48	4.11653	55	4.11653	122	4.11653	57
4.11959	66	4.11959	56	4.11959	134	4.11959	44
4.12264	48	4.12264	46	4.12264	111	4.12264	46
4.12569	67	4.12569	55	4.12569	127	4.12569	50
4.12875	48	4.12875	58	4.12875	95	4.12875	37
4.1318	59	4.1318	36	4.1318	114	4.1318	36
4.13485	58	4.13485	55	4.13485	100	4.13485	39
4.13791	53	4.13791	56	4.13791	112	4.13791	47
4.14096	61	4.14096	56	4.14096	115	4.14096	67
4.14402	68	4.14402	44	4.14402	115	4.14402	42
4.14707	57	4.14707	53	4.14707	112	4.14707	53
4.15012	50	4.15012	58	4.15012	103	4.15012	51
4.15318	48	4.15318	52	4.15318	111	4.15318	42
4.15623	49	4.15623	70	4.15623	109	4.15623	61
4.15929	54	4.15929	45	4.15929	93	4.15929	68
4.16234	43	4.16234	39	4.16234	120	4.16234	43
4.16539	58	4.16539	48	4.16539	94	4.16539	59
4.16845	63	4.16845	53	4.16845	113	4.16845	58
4.1715	55	4.1715	39	4.1715	105	4.1715	46
4.17455	50	4.17455	62	4.17455	131	4.17455	35
4.17761	50	4.17761	52	4.17761	106	4.17761	51
4.18066	61	4.18066	53	4.18066	119	4.18066	58
4.18372	60	4.18372	52	4.18372	119	4.18372	43
4.18677	57	4.18677	52	4.18677	116	4.18677	43
4.18982	63	4.18982	45	4.18982	106	4.18982	41
4.19288	51	4.19288	50	4.19288	120	4.19288	51
4.19593	66	4.19593	46	4.19593	110	4.19593	46
4.19898	56	4.19898	61	4.19898	91	4.19898	46
4.20204	66	4.20204	46	4.20204	131	4.20204	33
4.20509	59	4.20509	67	4.20509	107	4.20509	39
4.20815	40	4.20815	52	4.20815	104	4.20815	53
4.2112	45	4.2112	50	4.2112	121	4.2112	50
4.21425	60	4.21425	46	4.21425	87	4.21425	65
4.21731	65	4.21731	51	4.21731	109	4.21731	52
4.22036	58	4.22036	35	4.22036	105	4.22036	48
4.22342	50	4.22342	52	4.22342	109	4.22342	43
4.22647	58	4.22647	50	4.22647	106	4.22647	47
4.22952	47	4.22952	51	4.22952	106	4.22952	39
4.23258	61	4.23258	37	4.23258	126	4.23258	44
4.23563	54	4.23563	42	4.23563	89	4.23563	45
4.23868	41	4.23868	56	4.23868	96	4.23868	39
4.24174	34	4.24174	52	4.24174	111	4.24174	53
4.24479	55	4.24479	41	4.24479	83	4.24479	63
4.24785	60	4.24785	49	4.24785	95	4.24785	49
4.2509	46	4.2509	52	4.2509	108	4.2509	47
4.25395	49	4.25395	38	4.25395	126	4.25395	63
4.25701	39	4.25701	40	4.25701	108	4.25701	38
4.26006	53	4.26006	50	4.26006	118	4.26006	57
4.26311	49	4.26311	46	4.26311	108	4.26311	48
4.26617	44	4.26617	54	4.26617	103	4.26617	54
4.26922	56	4.26922	51	4.26922	92	4.26922	47
4.27228	49	4.27228	48	4.27228	103	4.27228	47
4.27533	49	4.27533	32	4.27533	110	4.27533	55
4.27838	62	4.27838	52	4.27838	113	4.27838	65
4.28144	47	4.28144	36	4.28144	106	4.28144	50
4.28449	64	4.28449	37	4.28449	93	4.28449	48
4.28754	56	4.28754	40	4.28754	106	4.28754	45
4.2906	49	4.2906	44	4.2906	102	4.2906	44
4.29365	57	4.29365	45	4.29365	114	4.29365	43
4.29671	48	4.29671	39	4.29671	103	4.29671	51
4.29976	57	4.29976	46	4.29976	91	4.29976	53
4.30281	58	4.30281	40	4.30281	102	4.30281	54
4.30587	49	4.30587	49	4.30587	106	4.30587	59
4.30892	53	4.30892	45	4.30892	85	4.30892	37
4.31198	53	4.31198	51	4.31198	108	4.31198	42
4.31503	44	4.31503	48	4.31503	88	4.31503	52
4.31808	47	4.31808	42	4.31808	114	4.31808	43
4.32114	50	4.32114	41	4.32114	102	4.32114	47
4.32419	56	4.32419	42	4.32419	96	4.32419	38
4.32724	58	4.32724	42	4.32724	105	4.32724	42
4.3303	63	4.3303	55	4.3303	103	4.3303	41
4.33335	50	4.33335	43	4.33335	116	4.33335	39
4.33641	54	4.33641	44	4.33641	102	4.33641	46
4.33946	39	4.33946	38	4.33946	103	4.33946	37
4.34251	49	4.34251	45	4.34251	115	4.34251	44
4.34557	47	4.34557	49	4.34557	80	4.34557	44
4.34862	47	4.34862	39	4.34862	104	4.34862	54
4.35167	37	4.35167	55	4.35167	95	4.35167	45
4.35473	57	4.35473	49	4.35473	104	4.35473	48
4.35778	50	4.35778	42	4.35778	92	4.35778	43
4.36084	55	4.36084	49	4.36084	78	4.36084	52
4.36389	49	4.36389	48	4.36389	91	4.36389	58
4.36694	55	4.36694	48	4.36694	94	4.36694	44
4.37	35	4.37	43	4.37	79	4.37	63
4.37305	48	4.37305	36	4.37305	101	4.37305	49
4.37611	37	4.37611	49	4.37611	84	4.37611	41
4.37916	58	4.37916	56	4.37916	94	4.37916	27
4.38221	44	4.38221	52	4.38221	86	4.38221	47
4.38527	41	4.38527	49	4.38527	87	4.38527	35
4.38832	49	4.38832	34	4.38832	103	4.38832	40
4.39137	42	4.39137	40	4.39137	96	4.39137	44
4.39443	44	4.39443	38	4.39443	89	4.39443	43
4.39748	51	4.39748	42	4.39748	96	4.39748	39
4.40054	69	4.40054	39	4.40054	99	4.40054	48
4.40359	50	4.40359	49	4.40359	80	4.40359	45
4.40664	45	4.40664	37	4.40664	87	4.40664	45
4.4097	51	4.4097	39	4.4097	108	4.4097	35
4.41275	57	4.41275	31	4.41275	99	4.41275	45
4.4158	44	4.4158	48	4.4158	112	4.4158	42
4.41886	52	4.41886	44	4.41886	93	4.41886	46
4.42191	53	4.42191	41	4.42191	93	4.42191	48
4.42497	50	4.42497	45	4.42497	89	4.42497	50
4.42802	54	4.42802	57	4.42802	83	4.42802	42
4.43107	56	4.43107	35	4.43107	115	4.43107	39
4.43413	48	4.43413	63	4.43413	76	4.43413	49
4.43718	67	4.43718	58	4.43718	96	4.43718	37
4.44024	53	4.44024	37	4.44024	92	4.44024	49
4.44329	33	4.44329	35	4.44329	97	4.44329	55
4.44634	50	4.44634	40	4.44634	118	4.44634	46
4.4494	38	4.4494	40	4.4494	91	4.4494	43
4.45245	43	4.45245	44	4.45245	87	4.45245	42
4.4555	54	4.4555	45	4.4555	109	4.4555	41
4.45856	44	4.45856	56	4.45856	96	4.45856	31
4.46161	60	4.46161	44	4.46161	91	4.46161	36
4.46467	47	4.46467	45	4.46467	76	4.46467	46
4.46772	56	4.46772	40	4.46772	85	4.46772	44
4.47077	58	4.47077	37	4.47077	90	4.47077	38
4.47383	48	4.47383	36	4.47383	83	4.47383	47
4.47688	55	4.47688	37	4.47688	105	4.47688	44
4.47993	42	4.47993	42	4.47993	99	4.47993	35
4.48299	44	4.48299	43	4.48299	109	4.48299	47
4.48604	41	4.48604	42	4.48604	87	4.48604	40
4.4891	41	4.4891	41	4.4891	85	4.4891	43
4.49215	59	4.49215	48	4.49215	92	4.49215	36
4.4952	42	4.4952	33	4.4952	82	4.4952	31
4.49826	54	4.49826	40	4.49826	102	4.49826	48
4.50131	43	4.50131	36	4.50131	105	4.50131	38
4.50437	55	4.50437	38	4.50437	87	4.50437	22
4.50742	43	4.50742	40	4.50742	86	4.50742	44
4.51047	58	4.51047	43	4.51047	98	4.51047	43
4.51353	53	4.51353	53	4.51353	82	4.51353	35
4.51658	36	4.51658	49	4.51658	92	4.51658	52
4.51963	38	4.51963	43	4.51963	84	4.51963	33
4.52269	55	4.52269	36	4.52269	92	4.52269	41
4.52574	54	4.52574	30	4.52574	92	4.52574	42
4.5288	53	4.5288	48	4.5288	93	4.5288	43
4.53185	53	4.53185	33	4.53185	99	4.53185	35
4.5349	53	4.5349	35	4.5349	79	4.5349	44
4.53796	52	4.53796	37	4.53796	85	4.53796	29
4.54101	52	4.54101	46	4.54101	97	4.54101	52
4.54406	49	4.54406	36	4.54406	85	4.54406	48
4.54712	45	4.54712	34	4.54712	84	4.54712	41
4.55017	32	4.55017	32	4.55017	98	4.55017	45
4.55323	43	4.55323	48	4.55323	93	4.55323	35
4.55628	41	4.55628	39	4.55628	95	4.55628	45
4.55933	46	4.55933	47	4.55933	79	4.55933	43
4.56239	50	4.56239	34	4.56239	88	4.56239	45
4.56544	45	4.56544	27	4.56544	83	4.56544	36
4.5685	50	4.5685	41	4.5685	82	4.5685	31
4.57155	45	4.57155	45	4.57155	71	4.57155	32
4.5746	35	4.5746	44	4.5746	83	4.5746	49
4.57766	35	4.57766	24	4.57766	94	4.57766	42
4.58071	51	4.58071	38	4.58071	76	4.58071	34
4.58376	49	4.58376	38	4.58376	72	4.58376	32
4.58682	43	4.58682	39	4.58682	91	4.58682	41
4.58987	42	4.58987	34	4.58987	93	4.58987	34
4.59293	52	4.59293	38	4.59293	75	4.59293	24
4.59598	49	4.59598	39	4.59598	70	4.59598	33
4.59903	47	4.59903	54	4.59903	82	4.59903	43
4.60209	46	4.60209	35	4.60209	79	4.60209	38
4.60514	50	4.60514	42	4.60514	95	4.60514	38
4.60819	35	4.60819	34	4.60819	87	4.60819	47
4.61125	42	4.61125	31	4.61125	88	4.61125	36
4.6143	35	4.6143	42	4.6143	72	4.6143	33
4.61736	56	4.61736	44	4.61736	79	4.61736	32
4.62041	43	4.62041	35	4.62041	88	4.62041	30
4.62346	41	4.62346	31	4.62346	93	4.62346	33
4.62652	34	4.62652	30	4.62652	83	4.62652	41
4.62957	58	4.62957	33	4.62957	80	4.62957	31
4.63263	48	4.63263	47	4.63263	80	4.63263	31
4.63568	60	4.63568	31	4.63568	88	4.63568	39
4.63873	51	4.63873	36	4.63873	82	4.63873	27
4.64179	44	4.64179	42	4.64179	99	4.64179	25
4.64484	38	4.64484	44	4.64484	74	4.64484	40
4.64789	39	4.64789	33	4.64789	82	4.64789	34
4.65095	35	4.65095	45	4.65095	95	4.65095	42
4.654	43	4.654	40	4.654	79	4.654	30
4.65706	51	4.65706	34	4.65706	61	4.65706	39
4.66011	43	4.66011	30	4.66011	87	4.66011	32
4.66316	37	4.66316	42	4.66316	79	4.66316	29
4.66622	40	4.66622	33	4.66622	89	4.66622	40
4.66927	43	4.66927	44	4.66927	86	4.66927	52
4.67232	41	4.67232	35	4.67232	62	4.67232	36
4.67538	48	4.67538	29	4.67538	87	4.67538	31
4.67843	41	4.67843	40	4.67843	78	4.67843	36
4.68149	30	4.68149	42	4.68149	81	4.68149	40
4.68454	48	4.68454	29	4.68454	75	4.68454	33
4.68759	43	4.68759	36	4.68759	71	4.68759	36
4.69065	41	4.69065	45	4.69065	82	4.69065	37
4.6937	34	4.6937	34	4.6937	73	4.6937	46
4.69676	52	4.69676	39	4.69676	73	4.69676	36
4.69981	41	4.69981	34	4.69981	62	4.69981	44
4.70286	41	4.70286	29	4.70286	73	4.70286	41
4.70592	49	4.70592	34	4.70592	72	4.70592	31
4.70897	46	4.70897	36	4.70897	68	4.70897	26
4.71202	38	4.71202	33	4.71202	88	4.71202	46
4.71508	38	4.71508	43	4.71508	77	4.71508	29
4.71813	55	4.71813	32	4.71813	70	4.71813	31
4.72119	43	4.72119	41	4.72119	86	4.72119	27
4.72424	37	4.72424	45	4.72424	78	4.72424	41
4.72729	46	4.72729	34	4.72729	87	4.72729	40
4.73035	33	4.73035	31	4.73035	92	4.73035	39
4.7334	39	4.7334	32	4.7334	81	4.7334	34
4.73645	34	4.73645	35	4.73645	72	4.73645	40
4.73951	48	4.73951	20	4.73951	65	4.73951	29
4.74256	40	4.74256	35	4.74256	76	4.74256	27
4.74562	42	4.74562	48	4.74562	71	4.74562	31
4.74867	36	4.74867	36	4.74867	81	4.74867	34
4.75172	45	4.75172	33	4.75172	63	4.75172	33
4.75478	52	4.75478	33	4.75478	68	4.75478	32
4.75783	49	4.75783	36	4.75783	68	4.75783	28
4.76089	36	4.76089	31	4.76089	80	4.76089	37
4.76394	40	4.76394	37	4.76394	78	4.76394	46
4.76699	43	4.76699	29	4.76699	73	4.76699	38
4.77005	41	4.77005	40	4.77005	67	4.77005	30
4.7731	32	4.7731	32	4.7731	75	4.7731	40
4.77615	38	4.77615	32	4.77615	65	4.77615	42
4.77921	27	4.77921	37	4.77921	72	4.77921	38
4.78226	36	4.78226	31	4.78226	88	4.78226	36
4.78532	45	4.78532	35	4.78532	71	4.78532	32
4.78837	33	4.78837	45	4.78837	76	4.78837	35
4.79142	39	4.79142	41	4.79142	62	4.79142	41
4.79448	46	4.79448	28	4.79448	91	4.79448	39
4.79753	42	4.79753	27	4.79753	64	4.79753	32
4.80058	23	4.80058	35	4.80058	89	4.80058	31
4.80364	38	4.80364	30	4.80364	88	4.80364	41
4.80669	41	4.80669	43	4.80669	84	4.80669	36
4.80975	53	4.80975	42	4.80975	87	4.80975	45
4.8128	40	4.8128	39	4.8128	78	4.8128	33
4.81585	38	4.81585	33	4.81585	102	4.81585	35
4.81891	44	4.81891	47	4.81891	78	4.81891	49
4.82196	47	4.82196	35	4.82196	63	4.82196	27
4.82501	43	4.82501	35	4.82501	81	4.82501	28
4.82807	40	4.82807	29	4.82807	73	4.82807	26
4.83112	37	4.83112	46	4.83112	82	4.83112	35
4.83418	39	4.83418	38	4.83418	80	4.83418	50
4.83723	50	4.83723	40	4.83723	83	4.83723	29
4.84028	39	4.84028	36	4.84028	74	4.84028	38
4.84334	38	4.84334	39	4.84334	78	4.84334	35
4.84639	36	4.84639	52	4.84639	87	4.84639	34
4.84945	32	4.84945	34	4.84945	71	4.84945	31
4.8525	37	4.8525	34	4.8525	76	4.8525	49
4.85555	36	4.85555	37	4.85555	75	4.85555	33
4.85861	38	4.85861	44	4.85861	75	4.85861	31
4.86166	35	4.86166	33	4.86166	74	4.86166	39
4.86471	40	4.86471	33	4.86471	67	4.86471	34
4.86777	37	4.86777	36	4.86777	78	4.86777	28
4.87082	43	4.87082	40	4.87082	77	4.87082	33
4.87388	43	4.87388	32	4.87388	79	4.87388	20
4.87693	30	4.87693	42	4.87693	87	4.87693	33
4.87998	43	4.87998	35	4.87998	74	4.87998	25
4.88304	38	4.88304	39	4.88304	78	4.88304	36
4.88609	39	4.88609	36	4.88609	74	4.88609	25
4.88914	44	4.88914	23	4.88914	77	4.88914	31
4.8922	35	4.8922	27	4.8922	72	4.8922	31
4.89525	32	4.89525	31	4.89525	68	4.89525	35
4.89831	43	4.89831	36	4.89831	61	4.89831	33
4.90136	36	4.90136	31	4.90136	76	4.90136	34
4.90441	36	4.90441	37	4.90441	65	4.90441	39
4.90747	39	4.90747	25	4.90747	78	4.90747	41
4.91052	41	4.91052	33	4.91052	71	4.91052	26
4.91358	36	4.91358	27	4.91358	53	4.91358	34
4.91663	33	4.91663	40	4.91663	75	4.91663	41
4.91968	25	4.91968	40	4.91968	59	4.91968	32
4.92274	39	4.92274	28	4.92274	68	4.92274	28
4.92579	38	4.92579	27	4.92579	75	4.92579	35
4.92884	42	4.92884	29	4.92884	51	4.92884	23
4.9319	27	4.9319	37	4.9319	76	4.9319	33
4.93495	42	4.93495	35	4.93495	52	4.93495	40
4.93801	36	4.93801	33	4.93801	55	4.93801	40
4.94106	31	4.94106	43	4.94106	64	4.94106	32
4.94411	42	4.94411	42	4.94411	65	4.94411	32
4.94717	25	4.94717	35	4.94717	67	4.94717	30
4.95022	44	4.95022	26	4.95022	67	4.95022	30
4.95327	32	4.95327	30	4.95327	71	4.95327	29
4.95633	41	4.95633	34	4.95633	71	4.95633	36
4.95938	28	4.95938	28	4.95938	59	4.95938	43
4.96244	43	4.96244	41	4.96244	65	4.96244	30
4.96549	31	4.96549	34	4.96549	87	4.96549	28
4.96854	35	4.96854	37	4.96854	53	4.96854	25
4.9716	45	4.9716	27	4.9716	71	4.9716	27
4.97465	36	4.97465	28	4.97465	72	4.97465	34
4.97771	28	4.97771	33	4.97771	66	4.97771	29
4.98076	44	4.98076	48	4.98076	71	4.98076	27
4.98381	33	4.98381	31	4.98381	79	4.98381	29
4.98687	31	4.98687	33	4.98687	68	4.98687	19
4.98992	36	4.98992	30	4.98992	72	4.98992	27
4.99297	39	4.99297	37	4.99297	78	4.99297	33
4.99603	36	4.99603	37	4.99603	67	4.99603	26
4.99908	46	4.99908	40	4.99908	66	4.99908	37
5.00214	32	5.00214	35	5.00214	72	5.00214	41
5.00519	34	5.00519	27	5.00519	61	5.00519	37
5.00824	47	5.00824	39	5.00824	72	5.00824	27
5.0113	36	5.0113	27	5.0113	59	5.0113	26
5.01435	50	5.01435	35	5.01435	66	5.01435	29
5.0174	44	5.0174	36	5.0174	71	5.0174	27
5.02046	25	5.02046	32	5.02046	72	5.02046	37
5.02351	51	5.02351	27	5.02351	56	5.02351	17
5.02657	48	5.02657	33	5.02657	48	5.02657	25
5.02962	36	5.02962	33	5.02962	61	5.02962	23
5.03267	33	5.03267	36	5.03267	61	5.03267	38
5.03573	40	5.03573	31	5.03573	59	5.03573	22
5.03878	37	5.03878	23	5.03878	78	5.03878	27
5.04184	31	5.04184	26	5.04184	66	5.04184	25
5.04489	29	5.04489	39	5.04489	72	5.04489	28
5.04794	34	5.04794	33	5.04794	72	5.04794	29
5.051	40	5.051	31	5.051	67	5.051	25
5.05405	32	5.05405	24	5.05405	58	5.05405	25
5.0571	41	5.0571	39	5.0571	63	5.0571	32
5.06016	35	5.06016	33	5.06016	59	5.06016	37
5.06321	49	5.06321	33	5.06321	54	5.06321	28
5.06627	30	5.06627	33	5.06627	61	5.06627	25
5.06932	37	5.06932	36	5.06932	64	5.06932	30
5.07237	29	5.07237	37	5.07237	57	5.07237	25
5.07543	33	5.07543	29	5.07543	76	5.07543	39
5.07848	43	5.07848	34	5.07848	52	5.07848	27
5.08153	38	5.08153	28	5.08153	66	5.08153	28
5.08459	39	5.08459	28	5.08459	59	5.08459	20
5.08764	45	5.08764	30	5.08764	73	5.08764	26
5.0907	41	5.0907	38	5.0907	65	5.0907	26
5.09375	23	5.09375	38	5.09375	67	5.09375	33
5.0968	24	5.0968	39	5.0968	61	5.0968	35
5.09986	36	5.09986	22	5.09986	72	5.09986	30
5.10291	44	5.10291	34	5.10291	76	5.10291	35
5.10597	39	5.10597	40	5.10597	61	5.10597	25
5.10902	45	5.10902	26	5.10902	73	5.10902	31
5.11207	42	5.11207	37	5.11207	61	5.11207	30
5.11513	39	5.11513	24	5.11513	73	5.11513	34
5.11818	34	5.11818	37	5.11818	71	5.11818	29
5.12123	28	5.12123	28	5.12123	59	5.12123	33
5.12429	21	5.12429	29	5.12429	53	5.12429	22
5.12734	37	5.12734	33	5.12734	68	5.12734	32
5.1304	31	5.1304	28	5.1304	80	5.1304	25
5.13345	41	5.13345	23	5.13345	69	5.13345	35
5.1365	40	5.1365	43	5.1365	74	5.1365	27
5.13956	33	5.13956	27	5.13956	84	5.13956	35
5.14261	39	5.14261	29	5.14261	61	5.14261	27
5.14566	24	5.14566	31	5.14566	71	5.14566	24
5.14872	31	5.14872	28	5.14872	55	5.14872	25
5.15177	30	5.15177	32	5.15177	72	5.15177	35
5.15483	32	5.15483	31	5.15483	63	5.15483	23
5.15788	36	5.15788	37	5.15788	68	5.15788	31
5.16093	35	5.16093	34	5.16093	68	5.16093	33
5.16399	32	5.16399	26	5.16399	50	5.16399	24
5.16704	29	5.16704	22	5.16704	75	5.16704	24
5.1701	32	5.1701	24	5.1701	69	5.1701	25
5.17315	37	5.17315	28	5.17315	87	5.17315	31
5.1762	32	5.1762	31	5.1762	66	5.1762	23
5.17926	25	5.17926	22	5.17926	68	5.17926	31
5.18231	36	5.18231	23	5.18231	63	5.18231	30
5.18536	31	5.18536	29	5.18536	68	5.18536	22
5.18842	29	5.18842	42	5.18842	71	5.18842	23
5.19147	36	5.19147	34	5.19147	77	5.19147	29
5.19453	24	5.19453	25	5.19453	59	5.19453	27
5.19758	29	5.19758	25	5.19758	62	5.19758	31
5.20063	32	5.20063	28	5.20063	64	5.20063	24
5.20369	39	5.20369	31	5.20369	69	5.20369	30
5.20674	40	5.20674	28	5.20674	58	5.20674	32
5.20979	32	5.20979	33	5.20979	69	5.20979	22
5.21285	29	5.21285	37	5.21285	67	5.21285	36
5.2159	26	5.2159	31	5.2159	62	5.2159	23
5.21896	35	5.21896	27	5.21896	70	5.21896	19
5.22201	34	5.22201	33	5.22201	60	5.22201	32
5.22506	31	5.22506	33	5.22506	66	5.22506	29
5.22812	34	5.22812	28	5.22812	68	5.22812	31
5.23117	35	5.23117	29	5.23117	63	5.23117	25
5.23423	44	5.23423	35	5.23423	60	5.23423	21
5.23728	38	5.23728	24	5.23728	72	5.23728	28
5.24033	35	5.24033	31	5.24033	64	5.24033	29
5.24339	27	5.24339	26	5.24339	67	5.24339	21
5.24644	38	5.24644	22	5.24644	51	5.24644	39
5.24949	30	5.24949	30	5.24949	51	5.24949	27
5.25255	27	5.25255	24	5.25255	59	5.25255	36
5.2556	30	5.2556	34	5.2556	47	5.2556	33
5.25866	33	5.25866	21	5.25866	63	5.25866	20
5.26171	24	5.26171	37	5.26171	62	5.26171	29
5.26476	31	5.26476	27	5.26476	55	5.26476	28
5.26782	31	5.26782	22	5.26782	60	5.26782	20
5.27087	43	5.27087	25	5.27087	54	5.27087	22
5.27392	32	5.27392	35	5.27392	52	5.27392	25
5.27698	34	5.27698	25	5.27698	73	5.27698	21
5.28003	42	5.28003	32	5.28003	67	5.28003	26
5.28309	35	5.28309	24	5.28309	57	5.28309	17
5.28614	34	5.28614	29	5.28614	56	5.28614	14
5.28919	22	5.28919	26	5.28919	48	5.28919	34
5.29225	37	5.29225	29	5.29225	50	5.29225	23
5.2953	30	5.2953	21	5.2953	62	5.2953	27
5.29836	34	5.29836	30	5.29836	58	5.29836	33
5.30141	35	5.30141	20	5.30141	58	5.30141	33
5.30446	33	5.30446	25	5.30446	73	5.30446	32
5.30752	36	5.30752	25	5.30752	64	5.30752	36
5.31057	25	5.31057	31	5.31057	48	5.31057	35
5.31362	35	5.31362	25	5.31362	36	5.31362	21
5.31668	30	5.31668	31	5.31668	61	5.31668	31
5.31973	35	5.31973	26	5.31973	53	5.31973	16
5.32279	34	5.32279	27	5.32279	55	5.32279	32
5.32584	29	5.32584	26	5.32584	67	5.32584	19
5.32889	26	5.32889	40	5.32889	57	5.32889	35
5.33195	43	5.33195	43	5.33195	73	5.33195	26
5.335	21	5.335	21	5.335	66	5.335	37
5.33805	40	5.33805	28	5.33805	58	5.33805	30
5.34111	24	5.34111	26	5.34111	49	5.34111	27
5.34416	27	5.34416	27	5.34416	67	5.34416	24
5.34722	31	5.34722	27	5.34722	45	5.34722	20
5.35027	34	5.35027	24	5.35027	62	5.35027	23
5.35332	39	5.35332	23	5.35332	58	5.35332	26
5.35638	35	5.35638	40	5.35638	60	5.35638	24
5.35943	38	5.35943	31	5.35943	50	5.35943	27
5.36249	32	5.36249	36	5.36249	49	5.36249	25
5.36554	33	5.36554	32	5.36554	52	5.36554	14
5.36859	45	5.36859	23	5.36859	54	5.36859	28
5.37165	37	5.37165	26	5.37165	48	5.37165	26
5.3747	39	5.3747	41	5.3747	56	5.3747	32
5.37775	26	5.37775	33	5.37775	62	5.37775	28
5.38081	31	5.38081	27	5.38081	58	5.38081	25
5.38386	23	5.38386	21	5.38386	58	5.38386	22
5.38692	28	5.38692	24	5.38692	54	5.38692	32
5.38997	33	5.38997	26	5.38997	49	5.38997	31
5.39302	34	5.39302	21	5.39302	57	5.39302	27
5.39608	25	5.39608	26	5.39608	65	5.39608	25
5.39913	32	5.39913	28	5.39913	62	5.39913	25
5.40218	33	5.40218	23	5.40218	57	5.40218	25
5.40524	42	5.40524	31	5.40524	61	5.40524	24
5.40829	17	5.40829	23	5.40829	60	5.40829	23
5.41135	28	5.41135	19	5.41135	58	5.41135	34
5.4144	35	5.4144	36	5.4144	53	5.4144	25
5.41745	34	5.41745	37	5.41745	63	5.41745	26
5.42051	33	5.42051	23	5.42051	51	5.42051	21
5.42356	18	5.42356	33	5.42356	59	5.42356	29
5.42661	27	5.42661	21	5.42661	58	5.42661	30
5.42967	35	5.42967	24	5.42967	66	5.42967	27
5.43272	35	5.43272	25	5.43272	58	5.43272	28
5.43578	37	5.43578	36	5.43578	53	5.43578	22
5.43883	38	5.43883	29	5.43883	65	5.43883	27
5.44188	33	5.44188	30	5.44188	60	5.44188	20
5.44494	30	5.44494	23	5.44494	69	5.44494	21
5.44799	14	5.44799	30	5.44799	55	5.44799	29
5.45105	23	5.45105	21	5.45105	49	5.45105	30
5.4541	39	5.4541	30	5.4541	44	5.4541	19
5.45715	31	5.45715	33	5.45715	52	5.45715	19
5.46021	34	5.46021	26	5.46021	51	5.46021	29
5.46326	29	5.46326	23	5.46326	49	5.46326	26
5.46631	39	5.46631	32	5.46631	52	5.46631	25
5.46937	40	5.46937	23	5.46937	53	5.46937	38
5.47242	25	5.47242	34	5.47242	68	5.47242	19
5.47548	29	5.47548	20	5.47548	55	5.47548	19
5.47853	36	5.47853	30	5.47853	57	5.47853	25
5.48158	36	5.48158	21	5.48158	55	5.48158	19
5.48464	25	5.48464	24	5.48464	53	5.48464	28
5.48769	22	5.48769	21	5.48769	63	5.48769	36
5.49074	30	5.49074	25	5.49074	62	5.49074	23
5.4938	15	5.4938	39	5.4938	49	5.4938	22
5.49685	36	5.49685	25	5.49685	51	5.49685	26
5.49991	24	5.49991	35	5.49991	54	5.49991	23
5.50296	35	5.50296	26	5.50296	52	5.50296	30
5.50601	31	5.50601	22	5.50601	59	5.50601	18
5.50907	16	5.50907	32	5.50907	49	5.50907	25
5.51212	36	5.51212	26	5.51212	72	5.51212	25
5.51518	20	5.51518	33	5.51518	51	5.51518	27
5.51823	22	5.51823	34	5.51823	62	5.51823	13
5.52128	26	5.52128	40	5.52128	63	5.52128	22
5.52434	36	5.52434	22	5.52434	60	5.52434	26
5.52739	27	5.52739	25	5.52739	55	5.52739	30
5.53044	27	5.53044	26	5.53044	69	5.53044	21
5.5335	41	5.5335	36	5.5335	41	5.5335	23
5.53655	29	5.53655	29	5.53655	54	5.53655	30
5.53961	36	5.53961	33	5.53961	34	5.53961	23
5.54266	21	5.54266	19	5.54266	50	5.54266	24
5.54571	19	5.54571	33	5.54571	44	5.54571	27
5.54877	25	5.54877	20	5.54877	61	5.54877	25
5.55182	31	5.55182	20	5.55182	40	5.55182	23
5.55487	30	5.55487	23	5.55487	56	5.55487	31
5.55793	21	5.55793	24	5.55793	56	5.55793	25
5.56098	25	5.56098	26	5.56098	64	5.56098	22
5.56404	36	5.56404	32	5.56404	51	5.56404	20
5.56709	34	5.56709	22	5.56709	59	5.56709	21
5.57014	36	5.57014	19	5.57014	55	5.57014	27
5.5732	25	5.5732	42	5.5732	47	5.5732	26
5.57625	30	5.57625	23	5.57625	53	5.57625	17
5.57931	34	5.57931	33	5.57931	44	5.57931	18
5.58236	44	5.58236	22	5.58236	46	5.58236	23
5.58541	36	5.58541	23	5.58541	47	5.58541	16
5.58847	29	5.58847	29	5.58847	60	5.58847	20
5.59152	32	5.59152	27	5.59152	45	5.59152	24
5.59457	48	5.59457	30	5.59457	54	5.59457	22
5.59763	22	5.59763	21	5.59763	56	5.59763	28
5.60068	30	5.60068	25	5.60068	54	5.60068	24
5.60374	42	5.60374	23	5.60374	62	5.60374	25
5.60679	26	5.60679	22	5.60679	42	5.60679	23
5.60984	26	5.60984	30	5.60984	48	5.60984	22
5.6129	21	5.6129	21	5.6129	55	5.6129	32
5.61595	30	5.61595	32	5.61595	34	5.61595	31
5.619	27	5.619	31	5.619	64	5.619	21
5.62206	34	5.62206	33	5.62206	59	5.62206	28
5.62511	33	5.62511	36	5.62511	44	5.62511	23
5.62817	21	5.62817	23	5.62817	53	5.62817	22
5.63122	26	5.63122	17	5.63122	51	5.63122	26
5.63427	29	5.63427	31	5.63427	45	5.63427	13
5.63733	28	5.63733	26	5.63733	39	5.63733	26
5.64038	31	5.64038	30	5.64038	39	5.64038	26
5.64344	21	5.64344	31	5.64344	56	5.64344	17
5.64649	37	5.64649	28	5.64649	42	5.64649	14
5.64954	27	5.64954	23	5.64954	54	5.64954	23
5.6526	22	5.6526	26	5.6526	55	5.6526	23
5.65565	26	5.65565	23	5.65565	51	5.65565	20
5.6587	30	5.6587	24	5.6587	49	5.6587	18
5.66176	33	5.66176	27	5.66176	53	5.66176	20
5.66481	36	5.66481	21	5.66481	50	5.66481	20
5.66787	32	5.66787	26	5.66787	52	5.66787	22
5.67092	24	5.67092	24	5.67092	50	5.67092	29
5.67397	31	5.67397	32	5.67397	53	5.67397	16
5.67703	30	5.67703	26	5.67703	48	5.67703	17
5.68008	25	5.68008	25	5.68008	47	5.68008	32
5.68313	35	5.68313	21	5.68313	52	5.68313	28
5.68619	36	5.68619	28	5.68619	53	5.68619	38
5.68924	20	5.68924	26	5.68924	61	5.68924	17
5.6923	34	5.6923	21	5.6923	57	5.6923	24
5.69535	23	5.69535	28	5.69535	50	5.69535	31
5.6984	24	5.6984	31	5.6984	51	5.6984	22
5.70146	29	5.70146	19	5.70146	43	5.70146	22
5.70451	29	5.70451	21	5.70451	54	5.70451	26
5.70757	25	5.70757	23	5.70757	59	5.70757	31
5.71062	24	5.71062	19	5.71062	36	5.71062	24
5.71367	38	5.71367	21	5.71367	53	5.71367	24
5.71673	38	5.71673	26	5.71673	53	5.71673	35
5.71978	36	5.71978	22	5.71978	53	5.71978	15
5.72283	30	5.72283	26	5.72283	44	5.72283	12
5.72589	18	5.72589	30	5.72589	39	5.72589	12
5.72894	25	5.72894	27	5.72894	47	5.72894	25
5.732	24	5.732	28	5.732	47	5.732	23
5.73505	44	5.73505	26	5.73505	40	5.73505	18
5.7381	30	5.7381	17	5.7381	49	5.7381	26
5.74116	22	5.74116	18	5.74116	55	5.74116	24
5.74421	24	5.74421	18	5.74421	47	5.74421	23
5.74726	25	5.74726	29	5.74726	55	5.74726	16
5.75032	29	5.75032	25	5.75032	40	5.75032	28
5.75337	32	5.75337	17	5.75337	49	5.75337	18
5.75643	18	5.75643	22	5.75643	53	5.75643	23
5.75948	34	5.75948	25	5.75948	43	5.75948	19
5.76253	26	5.76253	25	5.76253	49	5.76253	16
5.76559	27	5.76559	28	5.76559	53	5.76559	27
5.76864	27	5.76864	23	5.76864	47	5.76864	20
5.7717	28	5.7717	29	5.7717	35	5.7717	29
5.77475	23	5.77475	22	5.77475	36	5.77475	26
5.7778	19	5.7778	24	5.7778	51	5.7778	31
5.78086	33	5.78086	32	5.78086	45	5.78086	23
5.78391	29	5.78391	21	5.78391	52	5.78391	26
5.78696	31	5.78696	23	5.78696	38	5.78696	22
5.79002	25	5.79002	27	5.79002	58	5.79002	22
5.79307	20	5.79307	26	5.79307	45	5.79307	27
5.79613	28	5.79613	18	5.79613	48	5.79613	20
5.79918	24	5.79918	25	5.79918	46	5.79918	24
5.80223	19	5.80223	28	5.80223	43	5.80223	21
5.80529	26	5.80529	25	5.80529	51	5.80529	27
5.80834	32	5.80834	25	5.80834	39	5.80834	25
5.81139	25	5.81139	25	5.81139	46	5.81139	30
5.81445	27	5.81445	15	5.81445	46	5.81445	20
5.8175	23	5.8175	27	5.8175	58	5.8175	15
5.82056	27	5.82056	21	5.82056	49	5.82056	19
5.82361	36	5.82361	19	5.82361	44	5.82361	20
5.82666	32	5.82666	32	5.82666	45	5.82666	17
5.82972	28	5.82972	22	5.82972	45	5.82972	20
5.83277	23	5.83277	15	5.83277	36	5.83277	24
5.83583	19	5.83583	23	5.83583	43	5.83583	16
5.83888	23	5.83888	22	5.83888	50	5.83888	18
5.84193	24	5.84193	27	5.84193	40	5.84193	15
5.84499	23	5.84499	27	5.84499	46	5.84499	17
5.84804	35	5.84804	21	5.84804	43	5.84804	32
5.85109	22	5.85109	32	5.85109	42	5.85109	15
5.85415	35	5.85415	19	5.85415	53	5.85415	24
5.8572	33	5.8572	24	5.8572	46	5.8572	18
5.86026	16	5.86026	27	5.86026	40	5.86026	24
5.86331	22	5.86331	33	5.86331	56	5.86331	16
5.86636	21	5.86636	31	5.86636	49	5.86636	23
5.86942	27	5.86942	24	5.86942	40	5.86942	14
5.87247	16	5.87247	21	5.87247	45	5.87247	24
5.87552	18	5.87552	26	5.87552	57	5.87552	20
5.87858	29	5.87858	29	5.87858	46	5.87858	20
5.88163	32	5.88163	19	5.88163	48	5.88163	24
5.88469	34	5.88469	28	5.88469	52	5.88469	19
5.88774	42	5.88774	21	5.88774	57	5.88774	28
5.89079	28	5.89079	19	5.89079	47	5.89079	17
5.89385	28	5.89385	29	5.89385	46	5.89385	17
5.8969	27	5.8969	28	5.8969	48	5.8969	20
5.89996	25	5.89996	24	5.89996	53	5.89996	21
5.90301	26	5.90301	25	5.90301	42	5.90301	23
5.90606	33	5.90606	24	5.90606	49	5.90606	25
5.90912	23	5.90912	27	5.90912	44	5.90912	23
5.91217	19	5.91217	26	5.91217	32	5.91217	18
5.91522	22	5.91522	29	5.91522	52	5.91522	24
5.91828	28	5.91828	26	5.91828	52	5.91828	23
5.92133	22	5.92133	21	5.92133	61	5.92133	15
5.92439	33	5.92439	24	5.92439	44	5.92439	21
5.92744	29	5.92744	25	5.92744	48	5.92744	15
5.93049	29	5.93049	27	5.93049	45	5.93049	23
5.93355	18	5.93355	30	5.93355	40	5.93355	21
5.9366	31	5.9366	27	5.9366	38	5.9366	19
5.93965	28	5.93965	23	5.93965	44	5.93965	14
5.94271	25	5.94271	28	5.94271	56	5.94271	21
5.94576	21	5.94576	16	5.94576	41	5.94576	18
5.94882	27	5.94882	21	5.94882	31	5.94882	19
5.95187	29	5.95187	18	5.95187	53	5.95187	19
5.95492	35	5.95492	31	5.95492	44	5.95492	19
5.95798	30	5.95798	22	5.95798	57	5.95798	12
5.96103	27	5.96103	22	5.96103	46	5.96103	19
5.96408	27	5.96408	18	5.96408	44	5.96408	16
5.96714	17	5.96714	23	5.96714	56	5.96714	25
5.97019	24	5.97019	26	5.97019	40	5.97019	22
5.97325	31	5.97325	30	5.97325	51	5.97325	27
5.9763	26	5.9763	23	5.9763	42	5.9763	19
5.97935	25	5.97935	18	5.97935	44	5.97935	19
5.98241	11	5.98241	18	5.98241	27	5.98241	27
5.98546	21	5.98546	23	5.98546	44	5.98546	18
5.98852	25	5.98852	16	5.98852	56	5.98852	18
5.99157	17	5.99157	19	5.99157	50	5.99157	20
5.99462	22	5.99462	26	5.99462	54	5.99462	20
5.99768	32	5.99768	27	5.99768	35	5.99768	21
6.00073	22	6.00073	24	6.00073	45	6.00073	29
6.00378	28	6.00378	22	6.00378	47	6.00378	22
6.00684	31	6.00684	23	6.00684	38	6.00684	22
6.00989	28	6.00989	22	6.00989	38	6.00989	15
6.01295	24	6.01295	25	6.01295	44	6.01295	23
6.016	18	6.016	40	6.016	41	6.016	13
6.01905	23	6.01905	18	6.01905	32	6.01905	20
6.02211	21	6.02211	17	6.02211	40	6.02211	19
6.02516	21	6.02516	23	6.02516	34	6.02516	26
6.02821	27	6.02821	32	6.02821	46	6.02821	17
6.03127	26	6.03127	20	6.03127	38	6.03127	20
6.03432	17	6.03432	20	6.03432	46	6.03432	14
6.03738	21	6.03738	21	6.03738	43	6.03738	28
6.04043	23	6.04043	21	6.04043	56	6.04043	23
6.04348	30	6.04348	20	6.04348	37	6.04348	21
6.04654	15	6.04654	19	6.04654	40	6.04654	20
6.04959	37	6.04959	22	6.04959	36	6.04959	18
6.05265	20	6.05265	28	6.05265	53	6.05265	19
6.0557	29	6.0557	11	6.0557	46	6.0557	29
6.05875	26	6.05875	38	6.05875	50	6.05875	14
6.06181	28	6.06181	19	6.06181	47	6.06181	28
6.06486	24	6.06486	24	6.06486	50	6.06486	24
6.06791	23	6.06791	24	6.06791	56	6.06791	22
6.07097	32	6.07097	30	6.07097	48	6.07097	16
6.07402	26	6.07402	18	6.07402	50	6.07402	17
6.07708	28	6.07708	28	6.07708	50	6.07708	17
6.08013	30	6.08013	22	6.08013	53	6.08013	20
6.08318	19	6.08318	14	6.08318	41	6.08318	25
6.08624	19	6.08624	24	6.08624	42	6.08624	28
6.08929	26	6.08929	25	6.08929	52	6.08929	28
6.09234	21	6.09234	23	6.09234	50	6.09234	26
6.0954	23	6.0954	20	6.0954	40	6.0954	23
6.09845	26	6.09845	25	6.09845	48	6.09845	21
6.10151	23	6.10151	24	6.10151	37	6.10151	20
[truncated: 2,097 more rows]

## Sheet: 4A+ HL
DARK		DARK		60' LIGHT		60' LIGHT
0	0	0	0	0	0	0	0
0.00305	0	0.00305	0	0.00305	0	0.00305	0
0.00611	0	0.00611	0	0.00611	0	0.00611	0
0.00916	0	0.00916	0	0.00916	0	0.00916	0
0.01222	0	0.01222	0	0.01222	0	0.01222	0
0.01527	0	0.01527	0	0.01527	0	0.01527	0
0.01832	0	0.01832	0	0.01832	0	0.01832	0
0.02138	0	0.02138	0	0.02138	0	0.02138	0
0.02443	0	0.02443	0	0.02443	0	0.02443	0
0.02748	0	0.02748	0	0.02748	0	0.02748	0
0.03054	0	0.03054	0	0.03054	0	0.03054	0
0.03359	0	0.03359	0	0.03359	0	0.03359	0
0.03665	0	0.03665	0	0.03665	0	0.03665	0
0.0397	0	0.0397	0	0.0397	0	0.0397	0
0.04275	0	0.04275	0	0.04275	0	0.04275	0
0.04581	0	0.04581	0	0.04581	0	0.04581	0
0.04886	0	0.04886	0	0.04886	0	0.04886	0
0.05191	0	0.05191	0	0.05191	0	0.05191	0
0.05497	0	0.05497	0	0.05497	0	0.05497	0
0.05802	0	0.05802	0	0.05802	0	0.05802	0
0.06108	0	0.06108	0	0.06108	0	0.06108	0
0.06413	0	0.06413	0	0.06413	0	0.06413	0
0.06718	0	0.06718	0	0.06718	0	0.06718	0
0.07024	0	0.07024	0	0.07024	0	0.07024	0
0.07329	0	0.07329	0	0.07329	0	0.07329	0
0.07635	0	0.07635	0	0.07635	0	0.07635	0
0.0794	0	0.0794	0	0.0794	0	0.0794	0
0.08245	0	0.08245	0	0.08245	0	0.08245	0
0.08551	0	0.08551	0	0.08551	0	0.08551	0
0.08856	0	0.08856	0	0.08856	0	0.08856	0
0.09161	0	0.09161	0	0.09161	0	0.09161	0
0.09467	0	0.09467	0	0.09467	0	0.09467	0
0.09772	0	0.09772	0	0.09772	0	0.09772	0
0.10078	0	0.10078	0	0.10078	0	0.10078	0
0.10383	0	0.10383	0	0.10383	0	0.10383	0
0.10688	0	0.10688	0	0.10688	0	0.10688	0
0.10994	0	0.10994	0	0.10994	0	0.10994	0
0.11299	0	0.11299	0	0.11299	0	0.11299	0
0.11604	0	0.11604	0	0.11604	0	0.11604	0
0.1191	0	0.1191	0	0.1191	0	0.1191	0
0.12215	0	0.12215	0	0.12215	0	0.12215	0
0.12521	0	0.12521	0	0.12521	0	0.12521	0
0.12826	0	0.12826	0	0.12826	0	0.12826	0
0.13131	0	0.13131	0	0.13131	0	0.13131	0
0.13437	0	0.13437	0	0.13437	0	0.13437	0
0.13742	0	0.13742	0	0.13742	0	0.13742	0
0.14048	0	0.14048	0	0.14048	0	0.14048	0
0.14353	0	0.14353	0	0.14353	0	0.14353	0
0.14658	0	0.14658	0	0.14658	0	0.14658	0
0.14964	0	0.14964	0	0.14964	0	0.14964	0
0.15269	0	0.15269	0	0.15269	0	0.15269	0
0.15574	0	0.15574	0	0.15574	0	0.15574	0
0.1588	0	0.1588	0	0.1588	0	0.1588	0
0.16185	0	0.16185	0	0.16185	0	0.16185	0
0.16491	0	0.16491	0	0.16491	0	0.16491	0
0.16796	0	0.16796	0	0.16796	0	0.16796	0
0.17101	0	0.17101	0	0.17101	0	0.17101	0
0.17407	0	0.17407	0	0.17407	0	0.17407	0
0.17712	0	0.17712	0	0.17712	0	0.17712	0
0.18017	0	0.18017	0	0.18017	0	0.18017	0
0.18323	0	0.18323	0	0.18323	0	0.18323	0
0.18628	0	0.18628	0	0.18628	0	0.18628	0
0.18934	0	0.18934	0	0.18934	0	0.18934	0
0.19239	0	0.19239	0	0.19239	0	0.19239	0
0.19544	0	0.19544	0	0.19544	0	0.19544	0
0.1985	0	0.1985	0	0.1985	0	0.1985	0
0.20155	0	0.20155	0	0.20155	0	0.20155	0
0.20461	0	0.20461	0	0.20461	0	0.20461	0
0.20766	0	0.20766	0	0.20766	0	0.20766	0
0.21071	0	0.21071	0	0.21071	0	0.21071	0
0.21377	0	0.21377	0	0.21377	0	0.21377	0
0.21682	0	0.21682	0	0.21682	0	0.21682	0
0.21987	0	0.21987	0	0.21987	0	0.21987	0
0.22293	0	0.22293	0	0.22293	0	0.22293	0
0.22598	0	0.22598	0	0.22598	0	0.22598	0
0.22904	0	0.22904	0	0.22904	0	0.22904	0
0.23209	0	0.23209	0	0.23209	0	0.23209	0
0.23514	0	0.23514	0	0.23514	0	0.23514	0
0.2382	0	0.2382	0	0.2382	0	0.2382	0
0.24125	0	0.24125	0	0.24125	0	0.24125	0
0.2443	0	0.2443	0	0.2443	0	0.2443	0
0.24736	0	0.24736	0	0.24736	0	0.24736	0
0.25041	0	0.25041	0	0.25041	0	0.25041	0
0.25347	0	0.25347	0	0.25347	0	0.25347	0
0.25652	0	0.25652	0	0.25652	0	0.25652	0
0.25957	0	0.25957	0	0.25957	0	0.25957	0
0.26263	0	0.26263	0	0.26263	0	0.26263	0
0.26568	0	0.26568	0	0.26568	0	0.26568	0
0.26874	0	0.26874	0	0.26874	0	0.26874	0
0.27179	0	0.27179	0	0.27179	0	0.27179	0
0.27484	0	0.27484	0	0.27484	0	0.27484	0
0.2779	0	0.2779	0	0.2779	0	0.2779	0
0.28095	0	0.28095	0	0.28095	0	0.28095	0
0.284	0	0.284	0	0.284	0	0.284	0
0.28706	0	0.28706	0	0.28706	0	0.28706	0
0.29011	0	0.29011	0	0.29011	0	0.29011	0
0.29317	0	0.29317	0	0.29317	0	0.29317	0
0.29622	0	0.29622	0	0.29622	0	0.29622	0
0.29927	0	0.29927	0	0.29927	0	0.29927	0
0.30233	0	0.30233	0	0.30233	0	0.30233	0
0.30538	0	0.30538	0	0.30538	0	0.30538	0
0.30843	0	0.30843	0	0.30843	0	0.30843	0
0.31149	0	0.31149	0	0.31149	0	0.31149	0
0.31454	0	0.31454	0	0.31454	0	0.31454	0
0.3176	0	0.3176	0	0.3176	0	0.3176	0
0.32065	0	0.32065	0	0.32065	0	0.32065	0
0.3237	0	0.3237	0	0.3237	0	0.3237	0
0.32676	0	0.32676	0	0.32676	0	0.32676	0
0.32981	0	0.32981	0	0.32981	0	0.32981	0
0.33286	0	0.33286	0	0.33286	0	0.33286	0
0.33592	0	0.33592	0	0.33592	0	0.33592	0
0.33897	0	0.33897	0	0.33897	0	0.33897	0
0.34203	0	0.34203	0	0.34203	0	0.34203	0
0.34508	0	0.34508	0	0.34508	0	0.34508	0
0.34813	0	0.34813	0	0.34813	0	0.34813	0
0.35119	0	0.35119	0	0.35119	0	0.35119	0
0.35424	0	0.35424	0	0.35424	0	0.35424	0
0.3573	0	0.3573	0	0.3573	0	0.3573	0
0.36035	0	0.36035	0	0.36035	0	0.36035	0
0.3634	0	0.3634	0	0.3634	0	0.3634	0
0.36646	0	0.36646	0	0.36646	0	0.36646	0
0.36951	0	0.36951	0	0.36951	0	0.36951	0
0.37256	0	0.37256	0	0.37256	0	0.37256	0
0.37562	0	0.37562	0	0.37562	0	0.37562	0
0.37867	0	0.37867	0	0.37867	0	0.37867	0
0.38173	0	0.38173	0	0.38173	0	0.38173	0
0.38478	0	0.38478	0	0.38478	0	0.38478	0
0.38783	0	0.38783	0	0.38783	0	0.38783	0
0.39089	0	0.39089	0	0.39089	0	0.39089	0
0.39394	0	0.39394	0	0.39394	0	0.39394	0
0.39699	0	0.39699	0	0.39699	0	0.39699	0
0.40005	0	0.40005	0	0.40005	0	0.40005	0
0.4031	0	0.4031	0	0.4031	0	0.4031	0
0.40616	0	0.40616	0	0.40616	0	0.40616	0
0.40921	0	0.40921	0	0.40921	0	0.40921	0
0.41226	0	0.41226	0	0.41226	0	0.41226	0
0.41532	0	0.41532	0	0.41532	0	0.41532	0
0.41837	0	0.41837	0	0.41837	0	0.41837	0
0.42143	0	0.42143	0	0.42143	0	0.42143	0
0.42448	0	0.42448	0	0.42448	0	0.42448	0
0.42753	0	0.42753	0	0.42753	0	0.42753	0
0.43059	0	0.43059	0	0.43059	0	0.43059	0
0.43364	0	0.43364	0	0.43364	0	0.43364	0
0.43669	0	0.43669	0	0.43669	0	0.43669	0
0.43975	0	0.43975	0	0.43975	0	0.43975	0
0.4428	0	0.4428	0	0.4428	0	0.4428	0
0.44586	0	0.44586	0	0.44586	0	0.44586	0
0.44891	0	0.44891	0	0.44891	0	0.44891	0
0.45196	0	0.45196	0	0.45196	0	0.45196	0
0.45502	0	0.45502	0	0.45502	0	0.45502	0
0.45807	0	0.45807	0	0.45807	0	0.45807	0
0.46112	0	0.46112	0	0.46112	0	0.46112	0
0.46418	0	0.46418	0	0.46418	0	0.46418	0
0.46723	0	0.46723	0	0.46723	0	0.46723	0
0.47029	0	0.47029	0	0.47029	0	0.47029	0
0.47334	0	0.47334	0	0.47334	0	0.47334	0
0.47639	0	0.47639	0	0.47639	0	0.47639	0
0.47945	0	0.47945	0	0.47945	0	0.47945	0
0.4825	0	0.4825	0	0.4825	0	0.4825	0
0.48556	0	0.48556	0	0.48556	0	0.48556	0
0.48861	0	0.48861	0	0.48861	0	0.48861	0
0.49166	0	0.49166	0	0.49166	0	0.49166	0
0.49472	0	0.49472	0	0.49472	0	0.49472	0
0.49777	0	0.49777	0	0.49777	0	0.49777	0
0.50082	0	0.50082	0	0.50082	0	0.50082	0
0.50388	0	0.50388	0	0.50388	0	0.50388	0
0.50693	0	0.50693	0	0.50693	0	0.50693	0
0.50999	0	0.50999	0	0.50999	0	0.50999	0
0.51304	0	0.51304	0	0.51304	0	0.51304	0
0.51609	0	0.51609	0	0.51609	0	0.51609	0
0.51915	0	0.51915	0	0.51915	0	0.51915	0
0.5222	0	0.5222	0	0.5222	0	0.5222	0
0.52525	0	0.52525	0	0.52525	0	0.52525	0
0.52831	0	0.52831	0	0.52831	0	0.52831	0
0.53136	0	0.53136	0	0.53136	0	0.53136	0
0.53442	0	0.53442	0	0.53442	0	0.53442	0
0.53747	0	0.53747	0	0.53747	0	0.53747	0
0.54052	0	0.54052	0	0.54052	0	0.54052	0
0.54358	0	0.54358	0	0.54358	0	0.54358	0
0.54663	0	0.54663	0	0.54663	0	0.54663	0
0.54969	0	0.54969	0	0.54969	0	0.54969	0
0.55274	0	0.55274	0	0.55274	0	0.55274	0
0.55579	0	0.55579	0	0.55579	0	0.55579	0
0.55885	0	0.55885	0	0.55885	0	0.55885	0
0.5619	0	0.5619	0	0.5619	0	0.5619	0
0.56495	0	0.56495	0	0.56495	0	0.56495	0
0.56801	0	0.56801	0	0.56801	0	0.56801	0
0.57106	0	0.57106	0	0.57106	0	0.57106	0
0.57412	0	0.57412	0	0.57412	0	0.57412	0
0.57717	0	0.57717	0	0.57717	0	0.57717	0
0.58022	0	0.58022	0	0.58022	0	0.58022	0
0.58328	0	0.58328	0	0.58328	0	0.58328	0
0.58633	0	0.58633	0	0.58633	0	0.58633	0
0.58938	0	0.58938	0	0.58938	0	0.58938	0
0.59244	0	0.59244	0	0.59244	0	0.59244	0
0.59549	0	0.59549	0	0.59549	0	0.59549	0
0.59855	0	0.59855	0	0.59855	0	0.59855	0
0.6016	0	0.6016	0	0.6016	0	0.6016	0
0.60465	0	0.60465	0	0.60465	0	0.60465	0
0.60771	0	0.60771	0	0.60771	0	0.60771	0
0.61076	0	0.61076	0	0.61076	0	0.61076	0
0.61382	0	0.61382	0	0.61382	0	0.61382	0
0.61687	0	0.61687	0	0.61687	0	0.61687	0
0.61992	0	0.61992	0	0.61992	0	0.61992	0
0.62298	0	0.62298	0	0.62298	0	0.62298	0
0.62603	0	0.62603	0	0.62603	0	0.62603	0
0.62908	0	0.62908	0	0.62908	0	0.62908	0
0.63214	0	0.63214	0	0.63214	0	0.63214	0
0.63519	6	0.63519	13	0.63519	3	0.63519	6
0.63825	6	0.63825	17	0.63825	6	0.63825	6
0.6413	5	0.6413	6	0.6413	6	0.6413	6
0.64435	4	0.64435	9	0.64435	2	0.64435	7
0.64741	10	0.64741	11	0.64741	8	0.64741	7
0.65046	6	0.65046	17	0.65046	8	0.65046	4
0.65351	9	0.65351	14	0.65351	7	0.65351	6
0.65657	4	0.65657	15	0.65657	4	0.65657	6
0.65962	6	0.65962	10	0.65962	2	0.65962	8
0.66268	3	0.66268	12	0.66268	6	0.66268	2
0.66573	5	0.66573	2	0.66573	7	0.66573	5
0.66878	6	0.66878	6	0.66878	8	0.66878	10
0.67184	2	0.67184	7	0.67184	4	0.67184	2
0.67489	5	0.67489	5	0.67489	2	0.67489	7
0.67795	8	0.67795	9	0.67795	6	0.67795	10
0.681	12	0.681	9	0.681	7	0.681	4
0.68405	8	0.68405	15	0.68405	3	0.68405	4
0.68711	12	0.68711	7	0.68711	2	0.68711	5
0.69016	6	0.69016	4	0.69016	4	0.69016	7
0.69321	9	0.69321	12	0.69321	8	0.69321	4
0.69627	7	0.69627	10	0.69627	5	0.69627	5
0.69932	6	0.69932	6	0.69932	6	0.69932	10
0.70238	5	0.70238	5	0.70238	5	0.70238	7
0.70543	2	0.70543	4	0.70543	4	0.70543	5
0.70848	7	0.70848	11	0.70848	5	0.70848	9
0.71154	4	0.71154	13	0.71154	7	0.71154	3
0.71459	6	0.71459	8	0.71459	4	0.71459	5
0.71764	6	0.71764	5	0.71764	5	0.71764	5
0.7207	9	0.7207	3	0.7207	6	0.7207	4
0.72375	2	0.72375	5	0.72375	5	0.72375	7
0.72681	2	0.72681	8	0.72681	8	0.72681	7
0.72986	5	0.72986	8	0.72986	11	0.72986	8
0.73291	7	0.73291	10	0.73291	7	0.73291	5
0.73597	12	0.73597	7	0.73597	9	0.73597	8
0.73902	5	0.73902	10	0.73902	9	0.73902	6
0.74208	6	0.74208	13	0.74208	12	0.74208	6
0.74513	10	0.74513	6	0.74513	9	0.74513	2
0.74818	5	0.74818	5	0.74818	3	0.74818	10
0.75124	7	0.75124	8	0.75124	6	0.75124	8
0.75429	7	0.75429	9	0.75429	5	0.75429	9
0.75734	8	0.75734	8	0.75734	7	0.75734	3
0.7604	12	0.7604	8	0.7604	6	0.7604	9
0.76345	9	0.76345	10	0.76345	5	0.76345	4
0.76651	6	0.76651	6	0.76651	6	0.76651	4
0.76956	5	0.76956	5	0.76956	3	0.76956	5
0.77261	8	0.77261	6	0.77261	6	0.77261	6
0.77567	10	0.77567	14	0.77567	6	0.77567	11
0.77872	9	0.77872	7	0.77872	7	0.77872	11
0.78177	5	0.78177	12	0.78177	6	0.78177	8
0.78483	12	0.78483	4	0.78483	4	0.78483	6
0.78788	9	0.78788	15	0.78788	6	0.78788	6
0.79094	8	0.79094	10	0.79094	5	0.79094	6
0.79399	9	0.79399	7	0.79399	9	0.79399	2
0.79704	5	0.79704	8	0.79704	5	0.79704	6
0.8001	9	0.8001	11	0.8001	4	0.8001	9
0.80315	4	0.80315	9	0.80315	5	0.80315	6
0.80621	7	0.80621	11	0.80621	4	0.80621	1
0.80926	3	0.80926	10	0.80926	5	0.80926	15
0.81231	10	0.81231	19	0.81231	5	0.81231	9
0.81537	7	0.81537	8	0.81537	7	0.81537	9
0.81842	5	0.81842	6	0.81842	10	0.81842	13
0.82147	9	0.82147	14	0.82147	3	0.82147	9
0.82453	5	0.82453	15	0.82453	8	0.82453	10
0.82758	3	0.82758	17	0.82758	5	0.82758	9
0.83064	8	0.83064	15	0.83064	6	0.83064	7
0.83369	6	0.83369	13	0.83369	3	0.83369	10
0.83674	4	0.83674	12	0.83674	5	0.83674	7
0.8398	12	0.8398	9	0.8398	4	0.8398	11
0.84285	2	0.84285	17	0.84285	9	0.84285	9
0.8459	9	0.8459	12	0.8459	7	0.8459	15
0.84896	5	0.84896	16	0.84896	11	0.84896	12
0.85201	8	0.85201	19	0.85201	6	0.85201	14
0.85507	10	0.85507	19	0.85507	10	0.85507	16
0.85812	3	0.85812	18	0.85812	8	0.85812	11
0.86117	10	0.86117	22	0.86117	10	0.86117	17
0.86423	12	0.86423	25	0.86423	13	0.86423	15
0.86728	10	0.86728	36	0.86728	10	0.86728	20
0.87033	10	0.87033	32	0.87033	15	0.87033	19
0.87339	8	0.87339	34	0.87339	5	0.87339	20
0.87644	9	0.87644	47	0.87644	10	0.87644	29
0.8795	9	0.8795	55	0.8795	13	0.8795	33
0.88255	16	0.88255	61	0.88255	13	0.88255	29
0.8856	10	0.8856	55	0.8856	15	0.8856	33
0.88866	12	0.88866	70	0.88866	19	0.88866	36
0.89171	18	0.89171	71	0.89171	30	0.89171	54
0.89477	27	0.89477	86	0.89477	33	0.89477	51
0.89782	24	0.89782	98	0.89782	25	0.89782	67
0.90087	20	0.90087	95	0.90087	21	0.90087	64
0.90393	32	0.90393	116	0.90393	34	0.90393	70
0.90698	28	0.90698	169	0.90698	27	0.90698	100
0.91003	36	0.91003	153	0.91003	34	0.91003	112
0.91309	39	0.91309	185	0.91309	47	0.91309	105
0.91614	43	0.91614	172	0.91614	48	0.91614	110
0.9192	40	0.9192	231	0.9192	64	0.9192	133
0.92225	41	0.92225	233	0.92225	48	0.92225	144
0.9253	71	0.9253	242	0.9253	75	0.9253	157
0.92836	64	0.92836	275	0.92836	88	0.92836	194
0.93141	68	0.93141	298	0.93141	89	0.93141	204
0.93446	82	0.93446	364	0.93446	99	0.93446	211
0.93752	88	0.93752	407	0.93752	118	0.93752	253
0.94057	90	0.94057	372	0.94057	145	0.94057	268
0.94363	107	0.94363	426	0.94363	140	0.94363	287
0.94668	128	0.94668	430	0.94668	135	0.94668	302
0.94973	132	0.94973	484	0.94973	160	0.94973	321
0.95279	166	0.95279	525	0.95279	182	0.95279	378
0.95584	139	0.95584	560	0.95584	204	0.95584	403
0.9589	146	0.9589	598	0.9589	201	0.9589	416
0.96195	204	0.96195	680	0.96195	229	0.96195	438
0.965	211	0.965	663	0.965	244	0.965	475
0.96806	223	0.96806	757	0.96806	286	0.96806	504
0.97111	243	0.97111	744	0.97111	275	0.97111	520
0.97416	263	0.97416	821	0.97416	307	0.97416	528
0.97722	278	0.97722	839	0.97722	314	0.97722	546
0.98027	294	0.98027	868	0.98027	363	0.98027	589
0.98333	310	0.98333	861	0.98333	341	0.98333	702
0.98638	335	0.98638	900	0.98638	361	0.98638	632
0.98943	345	0.98943	974	0.98943	405	0.98943	655
0.99249	365	0.99249	1023	0.99249	418	0.99249	696
0.99554	409	0.99554	1090	0.99554	440	0.99554	751
0.99859	420	0.99859	1133	0.99859	451	0.99859	785
1.00165	440	1.00165	1176	1.00165	520	1.00165	779
1.0047	455	1.0047	1166	1.0047	535	1.0047	852
1.00776	428	1.00776	1194	1.00776	519	1.00776	833
1.01081	454	1.01081	1291	1.01081	539	1.01081	905
1.01386	515	1.01386	1331	1.01386	565	1.01386	935
1.01692	551	1.01692	1294	1.01692	648	1.01692	926
1.01997	590	1.01997	1480	1.01997	648	1.01997	1008
1.02303	614	1.02303	1412	1.02303	647	1.02303	958
1.02608	630	1.02608	1486	1.02608	694	1.02608	1024
1.02913	643	1.02913	1520	1.02913	722	1.02913	978
1.03219	656	1.03219	1492	1.03219	738	1.03219	1035
1.03524	687	1.03524	1656	1.03524	701	1.03524	1070
1.03829	671	1.03829	1671	1.03829	792	1.03829	1058
1.04135	678	1.04135	1641	1.04135	810	1.04135	1147
1.0444	716	1.0444	1603	1.0444	825	1.0444	1165
1.04746	789	1.04746	1748	1.04746	856	1.04746	1112
1.05051	829	1.05051	1889	1.05051	893	1.05051	1191
1.05356	832	1.05356	1793	1.05356	873	1.05356	1218
1.05662	841	1.05662	1777	1.05662	902	1.05662	1217
1.05967	920	1.05967	1850	1.05967	945	1.05967	1241
1.06272	917	1.06272	1873	1.06272	938	1.06272	1269
1.06578	909	1.06578	1872	1.06578	921	1.06578	1272
1.06883	892	1.06883	1915	1.06883	1025	1.06883	1264
1.07189	936	1.07189	1970	1.07189	1012	1.07189	1333
1.07494	972	1.07494	1955	1.07494	1031	1.07494	1334
1.07799	1006	1.07799	2025	1.07799	1042	1.07799	1393
1.08105	1062	1.08105	2083	1.08105	1059	1.08105	1349
1.0841	1070	1.0841	2127	1.0841	1040	1.0841	1389
1.08716	1056	1.08716	2192	1.08716	1142	1.08716	1358
1.09021	1074	1.09021	2179	1.09021	1086	1.09021	1419
1.09326	1118	1.09326	2295	1.09326	1106	1.09326	1382
1.09632	1110	1.09632	2269	1.09632	1126	1.09632	1400
1.09937	1128	1.09937	2256	1.09937	1148	1.09937	1496
1.10242	1222	1.10242	2287	1.10242	1146	1.10242	1365
1.10548	1175	1.10548	2383	1.10548	1176	1.10548	1480
1.10853	1205	1.10853	2391	1.10853	1188	1.10853	1505
1.11159	1178	1.11159	2373	1.11159	1214	1.11159	1548
1.11464	1246	1.11464	2325	1.11464	1212	1.11464	1498
1.11769	1281	1.11769	2408	1.11769	1242	1.11769	1517
1.12075	1259	1.12075	2379	1.12075	1272	1.12075	1531
1.1238	1271	1.1238	2451	1.1238	1335	1.1238	1520
1.12685	1278	1.12685	2450	1.12685	1307	1.12685	1546
1.12991	1337	1.12991	2470	1.12991	1265	1.12991	1565
1.13296	1325	1.13296	2552	1.13296	1246	1.13296	1605
1.13602	1287	1.13602	2472	1.13602	1284	1.13602	1574
1.13907	1432	1.13907	2523	1.13907	1331	1.13907	1620
1.14212	1456	1.14212	2739	1.14212	1343	1.14212	1587
1.14518	1390	1.14518	2534	1.14518	1362	1.14518	1583
1.14823	1412	1.14823	2687	1.14823	1359	1.14823	1614
1.15129	1423	1.15129	2597	1.15129	1382	1.15129	1627
1.15434	1452	1.15434	2699	1.15434	1445	1.15434	1608
1.15739	1437	1.15739	2662	1.15739	1362	1.15739	1600
1.16045	1476	1.16045	2606	1.16045	1412	1.16045	1628
1.1635	1464	1.1635	2693	1.1635	1429	1.1635	1681
1.16655	1469	1.16655	2689	1.16655	1409	1.16655	1661
1.16961	1515	1.16961	2773	1.16961	1421	1.16961	1623
1.17266	1519	1.17266	2821	1.17266	1391	1.17266	1633
1.17572	1465	1.17572	2849	1.17572	1483	1.17572	1687
1.17877	1545	1.17877	2773	1.17877	1421	1.17877	1616
1.18182	1540	1.18182	2762	1.18182	1501	1.18182	1571
1.18488	1571	1.18488	2756	1.18488	1438	1.18488	1582
1.18793	1612	1.18793	2780	1.18793	1444	1.18793	1678
1.19098	1614	1.19098	2856	1.19098	1445	1.19098	1647
1.19404	1591	1.19404	2870	1.19404	1536	1.19404	1699
1.19709	1595	1.19709	2842	1.19709	1495	1.19709	1691
1.20015	1618	1.20015	2954	1.20015	1408	1.20015	1612
1.2032	1651	1.2032	2895	1.2032	1495	1.2032	1683
1.20625	1684	1.20625	2860	1.20625	1468	1.20625	1717
1.20931	1617	1.20931	2872	1.20931	1518	1.20931	1621
1.21236	1653	1.21236	2854	1.21236	1505	1.21236	1662
1.21542	1666	1.21542	2864	1.21542	1472	1.21542	1660
1.21847	1722	1.21847	2893	1.21847	1574	1.21847	1679
1.22152	1654	1.22152	2885	1.22152	1555	1.22152	1724
1.22458	1617	1.22458	2935	1.22458	1539	1.22458	1694
1.22763	1616	1.22763	2974	1.22763	1475	1.22763	1624
1.23068	1685	1.23068	2815	1.23068	1486	1.23068	1609
1.23374	1767	1.23374	3049	1.23374	1488	1.23374	1624
1.23679	1705	1.23679	2954	1.23679	1506	1.23679	1700
1.23985	1721	1.23985	2955	1.23985	1579	1.23985	1686
1.2429	1767	1.2429	2966	1.2429	1493	1.2429	1641
1.24595	1685	1.24595	2998	1.24595	1491	1.24595	1596
1.24901	1722	1.24901	2995	1.24901	1508	1.24901	1537
1.25206	1760	1.25206	2887	1.25206	1481	1.25206	1673
1.25511	1787	1.25511	2961	1.25511	1518	1.25511	1560
1.25817	1737	1.25817	2930	1.25817	1504	1.25817	1534
1.26122	1693	1.26122	2987	1.26122	1534	1.26122	1735
1.26428	1711	1.26428	3063	1.26428	1491	1.26428	1585
1.26733	1704	1.26733	3054	1.26733	1512	1.26733	1502
1.27038	1734	1.27038	3004	1.27038	1540	1.27038	1625
1.27344	1836	1.27344	2994	1.27344	1549	1.27344	1621
1.27649	1695	1.27649	2940	1.27649	1482	1.27649	1517
1.27955	1731	1.27955	2939	1.27955	1516	1.27955	1609
1.2826	1756	1.2826	2973	1.2826	1472	1.2826	1632
1.28565	1708	1.28565	2966	1.28565	1526	1.28565	1564
1.28871	1777	1.28871	3031	1.28871	1522	1.28871	1589
1.29176	1774	1.29176	3008	1.29176	1453	1.29176	1508
1.29481	1764	1.29481	2933	1.29481	1502	1.29481	1545
1.29787	1723	1.29787	2895	1.29787	1424	1.29787	1534
1.30092	1792	1.30092	2811	1.30092	1440	1.30092	1505
1.30398	1698	1.30398	2927	1.30398	1497	1.30398	1548
1.30703	1667	1.30703	2898	1.30703	1461	1.30703	1475
1.31008	1667	1.31008	2971	1.31008	1389	1.31008	1503
1.31314	1615	1.31314	2902	1.31314	1387	1.31314	1423
1.31619	1731	1.31619	2829	1.31619	1459	1.31619	1412
1.31924	1754	1.31924	2979	1.31924	1441	1.31924	1512
1.3223	1761	1.3223	2939	1.3223	1399	1.3223	1438
1.32535	1739	1.32535	2865	1.32535	1375	1.32535	1460
1.32841	1771	1.32841	2850	1.32841	1419	1.32841	1484
1.33146	1683	1.33146	2907	1.33146	1367	1.33146	1406
1.33451	1700	1.33451	2915	1.33451	1361	1.33451	1440
1.33757	1710	1.33757	2925	1.33757	1331	1.33757	1508
1.34062	1709	1.34062	2924	1.34062	1272	1.34062	1432
1.34368	1660	1.34368	2897	1.34368	1390	1.34368	1402
1.34673	1637	1.34673	2867	1.34673	1299	1.34673	1425
1.34978	1657	1.34978	2792	1.34978	1300	1.34978	1365
1.35284	1626	1.35284	2836	1.35284	1392	1.35284	1400
1.35589	1640	1.35589	2914	1.35589	1345	1.35589	1412
1.35894	1671	1.35894	2783	1.35894	1324	1.35894	1396
1.362	1573	1.362	2882	1.362	1261	1.362	1332
1.36505	1666	1.36505	2721	1.36505	1285	1.36505	1363
1.36811	1633	1.36811	2782	1.36811	1256	1.36811	1290
1.37116	1628	1.37116	2729	1.37116	1260	1.37116	1341
1.37421	1642	1.37421	2703	1.37421	1296	1.37421	1354
1.37727	1614	1.37727	2736	1.37727	1284	1.37727	1312
1.38032	1661	1.38032	2719	1.38032	1271	1.38032	1309
1.38337	1602	1.38337	2748	1.38337	1206	1.38337	1301
1.38643	1523	1.38643	2726	1.38643	1209	1.38643	1309
1.38948	1621	1.38948	2788	1.38948	1249	1.38948	1274
1.39254	1603	1.39254	2640	1.39254	1221	1.39254	1232
1.39559	1628	1.39559	2611	1.39559	1246	1.39559	1204
1.39864	1567	1.39864	2601	1.39864	1228	1.39864	1279
1.4017	1563	1.4017	2650	1.4017	1189	1.4017	1284
1.40475	1576	1.40475	2739	1.40475	1212	1.40475	1210
1.40781	1553	1.40781	2657	1.40781	1199	1.40781	1242
1.41086	1500	1.41086	2641	1.41086	1198	1.41086	1198
1.41391	1570	1.41391	2571	1.41391	1173	1.41391	1224
1.41697	1618	1.41697	2595	1.41697	1176	1.41697	1187
1.42002	1472	1.42002	2638	1.42002	1185	1.42002	1146
1.42307	1464	1.42307	2516	1.42307	1117	1.42307	1203
1.42613	1487	1.42613	2600	1.42613	1156	1.42613	1161
1.42918	1545	1.42918	2609	1.42918	1056	1.42918	1167
1.43224	1485	1.43224	2483	1.43224	1138	1.43224	1148
1.43529	1439	1.43529	2585	1.43529	1059	1.43529	1129
1.43834	1481	1.43834	2556	1.43834	1109	1.43834	1148
1.4414	1453	1.4414	2459	1.4414	1124	1.4414	1143
1.44445	1444	1.44445	2443	1.44445	1109	1.44445	1100
1.4475	1482	1.4475	2503	1.4475	1115	1.4475	1094
1.45056	1506	1.45056	2422	1.45056	1086	1.45056	1060
1.45361	1481	1.45361	2427	1.45361	1101	1.45361	1125
1.45667	1446	1.45667	2468	1.45667	1031	1.45667	1079
1.45972	1466	1.45972	2422	1.45972	1054	1.45972	1137
1.46277	1440	1.46277	2396	1.46277	1044	1.46277	1068
1.46583	1486	1.46583	2413	1.46583	1067	1.46583	1042
1.46888	1483	1.46888	2395	1.46888	1033	1.46888	1085
1.47193	1482	1.47193	2421	1.47193	1076	1.47193	1030
1.47499	1437	1.47499	2398	1.47499	1044	1.47499	1050
1.47804	1450	1.47804	2417	1.47804	991	1.47804	1010
1.4811	1402	1.4811	2320	1.4811	1008	1.4811	1035
1.48415	1355	1.48415	2320	1.48415	1028	1.48415	1027
1.4872	1391	1.4872	2365	1.4872	1029	1.4872	1033
1.49026	1424	1.49026	2327	1.49026	1029	1.49026	1033
1.49331	1359	1.49331	2310	1.49331	1016	1.49331	1038
1.49637	1348	1.49637	2387	1.49637	987	1.49637	1023
1.49942	1399	1.49942	2410	1.49942	979	1.49942	957
1.50247	1345	1.50247	2201	1.50247	1000	1.50247	981
1.50553	1417	1.50553	2359	1.50553	990	1.50553	974
1.50858	1365	1.50858	2316	1.50858	975	1.50858	1027
1.51163	1395	1.51163	2287	1.51163	968	1.51163	959
1.51469	1419	1.51469	2339	1.51469	970	1.51469	999
1.51774	1435	1.51774	2354	1.51774	1005	1.51774	970
1.5208	1324	1.5208	2221	1.5208	958	1.5208	957
1.52385	1370	1.52385	2293	1.52385	984	1.52385	946
1.5269	1356	1.5269	2265	1.5269	973	1.5269	947
1.52996	1357	1.52996	2236	1.52996	950	1.52996	948
1.53301	1343	1.53301	2253	1.53301	943	1.53301	954
1.53606	1277	1.53606	2174	1.53606	919	1.53606	861
1.53912	1360	1.53912	2250	1.53912	934	1.53912	948
1.54217	1321	1.54217	2220	1.54217	883	1.54217	1001
1.54523	1313	1.54523	2160	1.54523	904	1.54523	956
1.54828	1324	1.54828	2175	1.54828	913	1.54828	943
1.55133	1315	1.55133	2222	1.55133	870	1.55133	926
1.55439	1288	1.55439	2178	1.55439	938	1.55439	873
1.55744	1344	1.55744	2170	1.55744	845	1.55744	908
1.5605	1260	1.5605	2209	1.5605	855	1.5605	865
1.56355	1353	1.56355	2209	1.56355	840	1.56355	864
1.5666	1313	1.5666	2200	1.5666	841	1.5666	875
1.56966	1225	1.56966	2256	1.56966	874	1.56966	930
1.57271	1336	1.57271	2149	1.57271	819	1.57271	849
1.57576	1242	1.57576	2137	1.57576	900	1.57576	867
1.57882	1231	1.57882	2140	1.57882	831	1.57882	880
1.58187	1248	1.58187	2145	1.58187	846	1.58187	838
1.58493	1263	1.58493	2101	1.58493	870	1.58493	850
1.58798	1262	1.58798	2169	1.58798	843	1.58798	870
1.59103	1309	1.59103	2101	1.59103	828	1.59103	880
1.59409	1229	1.59409	2131	1.59409	830	1.59409	831
1.59714	1271	1.59714	2023	1.59714	838	1.59714	835
1.60019	1243	1.60019	2092	1.60019	786	1.60019	793
1.60325	1175	1.60325	1974	1.60325	830	1.60325	856
1.6063	1188	1.6063	1991	1.6063	868	1.6063	812
1.60936	1187	1.60936	2038	1.60936	820	1.60936	804
1.61241	1229	1.61241	2082	1.61241	808	1.61241	838
1.61546	1201	1.61546	2048	1.61546	822	1.61546	764
1.61852	1150	1.61852	2127	1.61852	784	1.61852	805
1.62157	1162	1.62157	1992	1.62157	827	1.62157	812
1.62463	1195	1.62463	2023	1.62463	766	1.62463	768
1.62768	1218	1.62768	2038	1.62768	753	1.62768	802
1.63073	1213	1.63073	1928	1.63073	745	1.63073	815
1.63379	1170	1.63379	1965	1.63379	771	1.63379	739
1.63684	1162	1.63684	1937	1.63684	818	1.63684	779
1.63989	1182	1.63989	2001	1.63989	783	1.63989	694
1.64295	1197	1.64295	1881	1.64295	720	1.64295	768
1.646	1127	1.646	1960	1.646	746	1.646	776
1.64906	1146	1.64906	1903	1.64906	733	1.64906	748
1.65211	1131	1.65211	1856	1.65211	767	1.65211	723
1.65516	1086	1.65516	1871	1.65516	727	1.65516	690
1.65822	1131	1.65822	1886	1.65822	703	1.65822	680
1.66127	1162	1.66127	1846	1.66127	704	1.66127	680
1.66432	1130	1.66432	1907	1.66432	717	1.66432	718
1.66738	1099	1.66738	1904	1.66738	714	1.66738	714
1.67043	1118	1.67043	1839	1.67043	687	1.67043	697
1.67349	1026	1.67349	1879	1.67349	716	1.67349	685
1.67654	1011	1.67654	1864	1.67654	680	1.67654	680
1.67959	1102	1.67959	1838	1.67959	701	1.67959	688
1.68265	1010	1.68265	1823	1.68265	660	1.68265	686
1.6857	1062	1.6857	1750	1.6857	694	1.6857	678
1.68876	1026	1.68876	1824	1.68876	659	1.68876	655
1.69181	1053	1.69181	1765	1.69181	634	1.69181	639
1.69486	1081	1.69486	1636	1.69486	655	1.69486	688
1.69792	1016	1.69792	1739	1.69792	612	1.69792	688
1.70097	1024	1.70097	1695	1.70097	657	1.70097	652
1.70402	947	1.70402	1669	1.70402	640	1.70402	632
1.70708	1019	1.70708	1655	1.70708	646	1.70708	607
1.71013	990	1.71013	1744	1.71013	624	1.71013	579
1.71319	1025	1.71319	1733	1.71319	622	1.71319	637
1.71624	965	1.71624	1716	1.71624	605	1.71624	659
1.71929	978	1.71929	1684	1.71929	595	1.71929	650
1.72235	960	1.72235	1666	1.72235	580	1.72235	609
1.7254	1000	1.7254	1584	1.7254	643	1.7254	617
1.72845	969	1.72845	1679	1.72845	620	1.72845	578
1.73151	942	1.73151	1565	1.73151	592	1.73151	633
1.73456	974	1.73456	1644	1.73456	612	1.73456	626
1.73762	954	1.73762	1607	1.73762	601	1.73762	563
1.74067	946	1.74067	1485	1.74067	565	1.74067	614
1.74372	941	1.74372	1554	1.74372	615	1.74372	616
1.74678	926	1.74678	1565	1.74678	555	1.74678	601
1.74983	912	1.74983	1547	1.74983	539	1.74983	559
1.75289	982	1.75289	1567	1.75289	583	1.75289	579
1.75594	947	1.75594	1594	1.75594	594	1.75594	583
1.75899	835	1.75899	1527	1.75899	596	1.75899	581
1.76205	919	1.76205	1554	1.76205	560	1.76205	582
1.7651	922	1.7651	1501	1.7651	566	1.7651	569
1.76815	924	1.76815	1513	1.76815	515	1.76815	569
1.77121	891	1.77121	1578	1.77121	559	1.77121	544
1.77426	918	1.77426	1480	1.77426	559	1.77426	569
1.77732	875	1.77732	1443	1.77732	528	1.77732	562
1.78037	892	1.78037	1477	1.78037	568	1.78037	563
1.78342	904	1.78342	1536	1.78342	488	1.78342	563
1.78648	933	1.78648	1434	1.78648	527	1.78648	519
1.78953	882	1.78953	1514	1.78953	539	1.78953	548
1.79258	926	1.79258	1540	1.79258	555	1.79258	547
1.79564	910	1.79564	1536	1.79564	527	1.79564	531
1.79869	866	1.79869	1474	1.79869	523	1.79869	551
1.80175	897	1.80175	1543	1.80175	519	1.80175	537
1.8048	893	1.8048	1436	1.8048	530	1.8048	535
1.80785	885	1.80785	1411	1.80785	515	1.80785	549
1.81091	880	1.81091	1487	1.81091	497	1.81091	490
1.81396	873	1.81396	1430	1.81396	500	1.81396	531
1.81702	843	1.81702	1356	1.81702	481	1.81702	519
1.82007	861	1.82007	1424	1.82007	487	1.82007	487
1.82312	836	1.82312	1424	1.82312	490	1.82312	487
1.82618	848	1.82618	1454	1.82618	504	1.82618	516
1.82923	845	1.82923	1422	1.82923	477	1.82923	485
1.83228	850	1.83228	1440	1.83228	444	1.83228	484
1.83534	845	1.83534	1338	1.83534	482	1.83534	530
1.83839	822	1.83839	1416	1.83839	512	1.83839	505
1.84145	769	1.84145	1423	1.84145	475	1.84145	470
1.8445	773	1.8445	1497	1.8445	486	1.8445	474
1.84755	802	1.84755	1396	1.84755	492	1.84755	497
1.85061	830	1.85061	1428	1.85061	488	1.85061	532
1.85366	843	1.85366	1384	1.85366	473	1.85366	465
1.85671	826	1.85671	1420	1.85671	486	1.85671	517
1.85977	831	1.85977	1451	1.85977	473	1.85977	489
1.86282	861	1.86282	1372	1.86282	474	1.86282	486
1.86588	836	1.86588	1398	1.86588	448	1.86588	467
1.86893	790	1.86893	1329	1.86893	463	1.86893	485
1.87198	821	1.87198	1319	1.87198	474	1.87198	500
1.87504	821	1.87504	1343	1.87504	436	1.87504	460
1.87809	815	1.87809	1418	1.87809	473	1.87809	472
1.88115	742	1.88115	1341	1.88115	469	1.88115	461
1.8842	784	1.8842	1270	1.8842	472	1.8842	469
1.88725	767	1.88725	1378	1.88725	447	1.88725	431
1.89031	821	1.89031	1354	1.89031	455	1.89031	439
1.89336	840	1.89336	1359	1.89336	447	1.89336	493
1.89641	787	1.89641	1341	1.89641	449	1.89641	455
1.89947	799	1.89947	1320	1.89947	416	1.89947	495
1.90252	800	1.90252	1287	1.90252	431	1.90252	483
1.90558	793	1.90558	1308	1.90558	471	1.90558	473
1.90863	846	1.90863	1354	1.90863	435	1.90863	442
1.91168	780	1.91168	1305	1.91168	444	1.91168	431
1.91474	832	1.91474	1304	1.91474	428	1.91474	461
1.91779	820	1.91779	1321	1.91779	471	1.91779	457
1.92084	794	1.92084	1244	1.92084	466	1.92084	443
1.9239	770	1.9239	1254	1.9239	432	1.9239	472
1.92695	784	1.92695	1282	1.92695	413	1.92695	450
1.93001	760	1.93001	1325	1.93001	438	1.93001	479
1.93306	809	1.93306	1289	1.93306	429	1.93306	414
1.93611	795	1.93611	1324	1.93611	421	1.93611	432
1.93917	722	1.93917	1278	1.93917	400	1.93917	468
1.94222	772	1.94222	1261	1.94222	458	1.94222	454
1.94528	749	1.94528	1294	1.94528	411	1.94528	405
1.94833	836	1.94833	1334	1.94833	409	1.94833	425
1.95138	759	1.95138	1309	1.95138	475	1.95138	439
1.95444	756	1.95444	1283	1.95444	428	1.95444	436
1.95749	837	1.95749	1235	1.95749	428	1.95749	422
1.96054	772	1.96054	1182	1.96054	426	1.96054	409
1.9636	792	1.9636	1229	1.9636	392	1.9636	420
1.96665	700	1.96665	1241	1.96665	381	1.96665	435
1.96971	764	1.96971	1202	1.96971	428	1.96971	424
1.97276	767	1.97276	1271	1.97276	379	1.97276	412
1.97581	713	1.97581	1242	1.97581	400	1.97581	422
1.97887	719	1.97887	1135	1.97887	420	1.97887	405
1.98192	689	1.98192	1197	1.98192	382	1.98192	416
1.98497	741	1.98497	1170	1.98497	401	1.98497	417
1.98803	701	1.98803	1208	1.98803	410	1.98803	369
1.99108	705	1.99108	1186	1.99108	389	1.99108	402
1.99414	692	1.99414	1213	1.99414	372	1.99414	384
1.99719	696	1.99719	1287	1.99719	412	1.99719	406
2.00024	665	2.00024	1177	2.00024	393	2.00024	380
2.0033	747	2.0033	1223	2.0033	376	2.0033	420
2.00635	670	2.00635	1200	2.00635	457	2.00635	421
2.0094	714	2.0094	1109	2.0094	372	2.0094	393
2.01246	676	2.01246	1177	2.01246	349	2.01246	367
2.01551	716	2.01551	1171	2.01551	387	2.01551	372
2.01857	633	2.01857	1104	2.01857	358	2.01857	385
2.02162	686	2.02162	1107	2.02162	402	2.02162	371
2.02467	706	2.02467	1206	2.02467	378	2.02467	347
2.02773	690	2.02773	1102	2.02773	342	2.02773	380
2.03078	672	2.03078	1145	2.03078	337	2.03078	378
2.03384	697	2.03384	1099	2.03384	360	2.03384	353
2.03689	667	2.03689	1116	2.03689	359	2.03689	393
2.03994	679	2.03994	1125	2.03994	356	2.03994	358
2.043	626	2.043	1105	2.043	379	2.043	403
2.04605	653	2.04605	1031	2.04605	356	2.04605	377
2.0491	640	2.0491	1099	2.0491	348	2.0491	359
2.05216	662	2.05216	1140	2.05216	375	2.05216	343
2.05521	663	2.05521	1053	2.05521	338	2.05521	339
2.05827	631	2.05827	1045	2.05827	337	2.05827	321
2.06132	609	2.06132	1065	2.06132	368	2.06132	345
2.06437	624	2.06437	1028	2.06437	340	2.06437	362
2.06743	610	2.06743	1064	2.06743	310	2.06743	348
2.07048	644	2.07048	1063	2.07048	328	2.07048	378
2.07353	568	2.07353	1038	2.07353	325	2.07353	344
2.07659	627	2.07659	1043	2.07659	354	2.07659	368
2.07964	625	2.07964	1010	2.07964	337	2.07964	359
2.0827	602	2.0827	1049	2.0827	327	2.0827	348
2.08575	623	2.08575	974	2.08575	309	2.08575	303
2.0888	637	2.0888	1087	2.0888	315	2.0888	333
2.09186	579	2.09186	1011	2.09186	317	2.09186	353
2.09491	636	2.09491	1059	2.09491	294	2.09491	331
2.09797	603	2.09797	1054	2.09797	311	2.09797	350
2.10102	603	2.10102	1020	2.10102	305	2.10102	386
2.10407	600	2.10407	1033	2.10407	313	2.10407	333
2.10713	581	2.10713	966	2.10713	313	2.10713	345
2.11018	601	2.11018	1000	2.11018	317	2.11018	338
2.11323	617	2.11323	944	2.11323	290	2.11323	321
2.11629	598	2.11629	993	2.11629	303	2.11629	325
2.11934	603	2.11934	966	2.11934	312	2.11934	312
2.1224	606	2.1224	1007	2.1224	284	2.1224	318
2.12545	573	2.12545	958	2.12545	312	2.12545	301
2.1285	608	2.1285	960	2.1285	292	2.1285	310
2.13156	559	2.13156	941	2.13156	328	2.13156	319
2.13461	598	2.13461	1012	2.13461	313	2.13461	327
2.13766	562	2.13766	943	2.13766	324	2.13766	301
2.14072	560	2.14072	967	2.14072	274	2.14072	301
2.14377	587	2.14377	953	2.14377	324	2.14377	268
2.14683	533	2.14683	914	2.14683	301	2.14683	331
2.14988	549	2.14988	914	2.14988	278	2.14988	294
2.15293	578	2.15293	980	2.15293	260	2.15293	285
2.15599	544	2.15599	922	2.15599	247	2.15599	326
2.15904	582	2.15904	929	2.15904	285	2.15904	318
2.1621	530	2.1621	939	2.1621	308	2.1621	305
2.16515	588	2.16515	899	2.16515	275	2.16515	280
2.1682	573	2.1682	921	2.1682	285	2.1682	293
2.17126	562	2.17126	914	2.17126	269	2.17126	290
2.17431	537	2.17431	899	2.17431	264	2.17431	316
2.17736	544	2.17736	892	2.17736	289	2.17736	310
2.18042	543	2.18042	898	2.18042	283	2.18042	268
2.18347	557	2.18347	885	2.18347	270	2.18347	259
2.18653	571	2.18653	857	2.18653	298	2.18653	299
2.18958	558	2.18958	882	2.18958	267	2.18958	292
2.19263	542	2.19263	878	2.19263	255	2.19263	308
2.19569	527	2.19569	911	2.19569	277	2.19569	276
2.19874	496	2.19874	825	2.19874	261	2.19874	299
2.20179	502	2.20179	843	2.20179	253	2.20179	291
2.20485	562	2.20485	899	2.20485	262	2.20485	265
2.2079	528	2.2079	835	2.2079	255	2.2079	291
2.21096	540	2.21096	852	2.21096	286	2.21096	280
2.21401	575	2.21401	835	2.21401	242	2.21401	262
2.21706	483	2.21706	853	2.21706	261	2.21706	256
2.22012	519	2.22012	850	2.22012	265	2.22012	267
2.22317	544	2.22317	839	2.22317	288	2.22317	290
2.22623	500	2.22623	796	2.22623	266	2.22623	293
2.22928	531	2.22928	835	2.22928	286	2.22928	297
2.23233	502	2.23233	889	2.23233	273	2.23233	267
2.23539	528	2.23539	868	2.23539	265	2.23539	267
2.23844	528	2.23844	870	2.23844	242	2.23844	267
2.24149	522	2.24149	821	2.24149	234	2.24149	272
2.24455	568	2.24455	835	2.24455	245	2.24455	260
2.2476	489	2.2476	876	2.2476	247	2.2476	270
2.25066	505	2.25066	812	2.25066	258	2.25066	276
2.25371	554	2.25371	819	2.25371	272	2.25371	284
2.25676	507	2.25676	831	2.25676	251	2.25676	261
2.25982	499	2.25982	830	2.25982	259	2.25982	246
2.26287	478	2.26287	843	2.26287	277	2.26287	259
2.26592	517	2.26592	836	2.26592	237	2.26592	270
2.26898	478	2.26898	833	2.26898	224	2.26898	248
2.27203	501	2.27203	774	2.27203	227	2.27203	262
2.27509	506	2.27509	796	2.27509	227	2.27509	268
2.27814	531	2.27814	809	2.27814	242	2.27814	269
2.28119	484	2.28119	823	2.28119	224	2.28119	277
2.28425	500	2.28425	789	2.28425	231	2.28425	276
2.2873	499	2.2873	781	2.2873	237	2.2873	248
2.29036	525	2.29036	780	2.29036	233	2.29036	202
2.29341	494	2.29341	756	2.29341	241	2.29341	214
2.29646	490	2.29646	793	2.29646	252	2.29646	248
2.29952	525	2.29952	793	2.29952	219	2.29952	252
2.30257	498	2.30257	825	2.30257	200	2.30257	230
2.30562	494	2.30562	790	2.30562	253	2.30562	251
2.30868	479	2.30868	755	2.30868	222	2.30868	265
2.31173	503	2.31173	861	2.31173	211	2.31173	265
2.31479	448	2.31479	766	2.31479	237	2.31479	240
2.31784	498	2.31784	811	2.31784	205	2.31784	246
2.32089	484	2.32089	778	2.32089	234	2.32089	218
2.32395	529	2.32395	798	2.32395	215	2.32395	227
2.327	468	2.327	778	2.327	233	2.327	242
2.33005	476	2.33005	759	2.33005	233	2.33005	243
2.33311	492	2.33311	748	2.33311	218	2.33311	264
2.33616	473	2.33616	784	2.33616	205	2.33616	234
2.33922	520	2.33922	774	2.33922	231	2.33922	259
2.34227	500	2.34227	783	2.34227	218	2.34227	239
2.34532	463	2.34532	758	2.34532	219	2.34532	250
2.34838	464	2.34838	750	2.34838	216	2.34838	220
2.35143	478	2.35143	714	2.35143	219	2.35143	212
2.35449	461	2.35449	693	2.35449	230	2.35449	243
2.35754	486	2.35754	741	2.35754	223	2.35754	247
2.36059	485	2.36059	698	2.36059	193	2.36059	221
2.36365	433	2.36365	724	2.36365	219	2.36365	258
2.3667	472	2.3667	716	2.3667	212	2.3667	271
2.36975	461	2.36975	714	2.36975	223	2.36975	223
2.37281	483	2.37281	701	2.37281	199	2.37281	240
2.37586	489	2.37586	774	2.37586	210	2.37586	247
2.37892	471	2.37892	712	2.37892	204	2.37892	256
2.38197	480	2.38197	750	2.38197	222	2.38197	251
2.38502	451	2.38502	700	2.38502	216	2.38502	238
2.38808	477	2.38808	712	2.38808	215	2.38808	196
2.39113	477	2.39113	743	2.39113	212	2.39113	207
2.39418	460	2.39418	706	2.39418	210	2.39418	209
2.39724	422	2.39724	697	2.39724	227	2.39724	248
2.40029	453	2.40029	714	2.40029	215	2.40029	217
2.40335	437	2.40335	737	2.40335	200	2.40335	218
2.4064	421	2.4064	681	2.4064	216	2.4064	240
2.40945	455	2.40945	677	2.40945	211	2.40945	240
2.41251	445	2.41251	718	2.41251	200	2.41251	246
2.41556	458	2.41556	708	2.41556	183	2.41556	217
2.41862	470	2.41862	751	2.41862	182	2.41862	203
2.42167	431	2.42167	712	2.42167	220	2.42167	223
2.42472	456	2.42472	673	2.42472	203	2.42472	211
2.42778	496	2.42778	650	2.42778	175	2.42778	212
2.43083	442	2.43083	699	2.43083	220	2.43083	203
2.43388	455	2.43388	658	2.43388	223	2.43388	221
2.43694	481	2.43694	642	2.43694	200	2.43694	219
2.43999	426	2.43999	719	2.43999	205	2.43999	229
2.44305	472	2.44305	708	2.44305	205	2.44305	206
2.4461	431	2.4461	657	2.4461	210	2.4461	194
2.44915	425	2.44915	692	2.44915	205	2.44915	204
2.45221	366	2.45221	639	2.45221	199	2.45221	196
2.45526	440	2.45526	665	2.45526	185	2.45526	233
2.45831	422	2.45831	665	2.45831	210	2.45831	222
2.46137	379	2.46137	675	2.46137	186	2.46137	234
2.46442	417	2.46442	640	2.46442	171	2.46442	205
2.46748	422	2.46748	675	2.46748	171	2.46748	193
2.47053	408	2.47053	606	2.47053	183	2.47053	201
2.47358	437	2.47358	662	2.47358	180	2.47358	218
2.47664	443	2.47664	694	2.47664	197	2.47664	209
2.47969	386	2.47969	652	2.47969	200	2.47969	206
2.48275	411	2.48275	609	2.48275	171	2.48275	200
2.4858	406	2.4858	644	2.4858	195	2.4858	200
2.48885	399	2.48885	642	2.48885	200	2.48885	180
2.49191	405	2.49191	663	2.49191	190	2.49191	188
2.49496	437	2.49496	680	2.49496	187	2.49496	234
2.49801	426	2.49801	601	2.49801	175	2.49801	183
2.50107	422	2.50107	686	2.50107	179	2.50107	199
2.50412	419	2.50412	578	2.50412	178	2.50412	194
2.50718	398	2.50718	608	2.50718	181	2.50718	197
2.51023	406	2.51023	660	2.51023	175	2.51023	184
2.51328	419	2.51328	624	2.51328	186	2.51328	184
2.51634	435	2.51634	632	2.51634	172	2.51634	203
2.51939	386	2.51939	610	2.51939	169	2.51939	192
2.52244	405	2.52244	600	2.52244	201	2.52244	212
2.5255	361	2.5255	631	2.5255	183	2.5255	192
2.52855	424	2.52855	619	2.52855	183	2.52855	184
2.53161	378	2.53161	596	2.53161	157	2.53161	198
2.53466	344	2.53466	595	2.53466	175	2.53466	213
2.53771	418	2.53771	652	2.53771	192	2.53771	172
2.54077	393	2.54077	569	2.54077	167	2.54077	181
2.54382	407	2.54382	574	2.54382	155	2.54382	173
2.54688	409	2.54688	583	2.54688	195	2.54688	192
2.54993	399	2.54993	566	2.54993	167	2.54993	183
2.55298	408	2.55298	577	2.55298	182	2.55298	176
2.55604	390	2.55604	642	2.55604	158	2.55604	174
2.55909	363	2.55909	551	2.55909	184	2.55909	195
2.56214	371	2.56214	581	2.56214	184	2.56214	157
2.5652	378	2.5652	602	2.5652	161	2.5652	206
2.56825	343	2.56825	598	2.56825	144	2.56825	172
2.57131	379	2.57131	601	2.57131	193	2.57131	189
2.57436	374	2.57436	586	2.57436	186	2.57436	200
2.57741	374	2.57741	597	2.57741	155	2.57741	165
2.58047	409	2.58047	605	2.58047	172	2.58047	170
2.58352	370	2.58352	586	2.58352	184	2.58352	177
2.58657	381	2.58657	584	2.58657	164	2.58657	156
2.58963	395	2.58963	559	2.58963	175	2.58963	150
2.59268	348	2.59268	548	2.59268	153	2.59268	170
2.59574	412	2.59574	553	2.59574	178	2.59574	174
2.59879	394	2.59879	604	2.59879	173	2.59879	169
2.60184	372	2.60184	560	2.60184	180	2.60184	164
2.6049	365	2.6049	557	2.6049	155	2.6049	177
2.60795	402	2.60795	558	2.60795	159	2.60795	160
2.611	370	2.611	534	2.611	137	2.611	165
2.61406	372	2.61406	576	2.61406	173	2.61406	155
2.61711	373	2.61711	595	2.61711	153	2.61711	179
2.62017	365	2.62017	542	2.62017	186	2.62017	151
2.62322	376	2.62322	557	2.62322	164	2.62322	170
2.62627	358	2.62627	549	2.62627	154	2.62627	168
2.62933	349	2.62933	599	2.62933	150	2.62933	185
2.63238	337	2.63238	524	2.63238	162	2.63238	171
2.63544	386	2.63544	556	2.63544	136	2.63544	155
2.63849	366	2.63849	537	2.63849	163	2.63849	169
2.64154	376	2.64154	569	2.64154	168	2.64154	185
2.6446	353	2.6446	561	2.6446	161	2.6446	168
2.64765	302	2.64765	499	2.64765	170	2.64765	140
2.6507	328	2.6507	532	2.6507	145	2.6507	143
2.65376	334	2.65376	584	2.65376	141	2.65376	175
2.65681	365	2.65681	565	2.65681	147	2.65681	173
2.65987	375	2.65987	532	2.65987	144	2.65987	148
2.66292	357	2.66292	526	2.66292	151	2.66292	163
2.66597	354	2.66597	531	2.66597	137	2.66597	179
2.66903	358	2.66903	489	2.66903	160	2.66903	157
2.67208	322	2.67208	546	2.67208	153	2.67208	164
2.67513	346	2.67513	558	2.67513	163	2.67513	166
2.67819	357	2.67819	532	2.67819	153	2.67819	143
2.68124	364	2.68124	537	2.68124	149	2.68124	167
2.6843	380	2.6843	524	2.6843	146	2.6843	157
2.68735	355	2.68735	500	2.68735	128	2.68735	159
2.6904	386	2.6904	469	2.6904	152	2.6904	159
2.69346	361	2.69346	520	2.69346	140	2.69346	137
2.69651	337	2.69651	499	2.69651	131	2.69651	161
2.69957	371	2.69957	547	2.69957	139	2.69957	162
2.70262	356	2.70262	515	2.70262	142	2.70262	134
2.70567	333	2.70567	499	2.70567	135	2.70567	154
2.70873	330	2.70873	522	2.70873	139	2.70873	163
2.71178	341	2.71178	530	2.71178	166	2.71178	158
2.71483	346	2.71483	491	2.71483	164	2.71483	152
2.71789	335	2.71789	520	2.71789	145	2.71789	179
2.72094	339	2.72094	495	2.72094	111	2.72094	163
2.724	324	2.724	508	2.724	146	2.724	157
2.72705	304	2.72705	508	2.72705	138	2.72705	143
2.7301	368	2.7301	515	2.7301	150	2.7301	167
2.73316	318	2.73316	517	2.73316	144	2.73316	165
2.73621	312	2.73621	508	2.73621	118	2.73621	169
2.73926	325	2.73926	507	2.73926	137	2.73926	159
2.74232	326	2.74232	528	2.74232	135	2.74232	144
2.74537	296	2.74537	552	2.74537	124	2.74537	154
2.74843	310	2.74843	484	2.74843	133	2.74843	169
2.75148	311	2.75148	496	2.75148	138	2.75148	132
2.75453	352	2.75453	471	2.75453	130	2.75453	133
2.75759	312	2.75759	510	2.75759	153	2.75759	151
2.76064	361	2.76064	489	2.76064	123	2.76064	154
2.7637	331	2.7637	485	2.7637	141	2.7637	146
2.76675	328	2.76675	473	2.76675	110	2.76675	153
2.7698	348	2.7698	524	2.7698	120	2.7698	147
2.77286	281	2.77286	472	2.77286	153	2.77286	139
2.77591	289	2.77591	446	2.77591	143	2.77591	157
2.77896	314	2.77896	460	2.77896	117	2.77896	117
2.78202	306	2.78202	431	2.78202	116	2.78202	156
2.78507	335	2.78507	444	2.78507	119	2.78507	173
2.78813	320	2.78813	494	2.78813	109	2.78813	123
2.79118	307	2.79118	448	2.79118	121	2.79118	142
2.79423	306	2.79423	474	2.79423	127	2.79423	150
2.79729	355	2.79729	483	2.79729	115	2.79729	147
2.80034	274	2.80034	484	2.80034	123	2.80034	137
2.80339	311	2.80339	448	2.80339	132	2.80339	139
2.80645	262	2.80645	448	2.80645	123	2.80645	155
2.8095	289	2.8095	460	2.8095	132	2.8095	136
2.81256	307	2.81256	482	2.81256	116	2.81256	136
2.81561	287	2.81561	457	2.81561	121	2.81561	125
2.81866	317	2.81866	440	2.81866	117	2.81866	132
2.82172	317	2.82172	475	2.82172	111	2.82172	127
2.82477	293	2.82477	459	2.82477	93	2.82477	131
2.82783	270	2.82783	462	2.82783	117	2.82783	117
2.83088	307	2.83088	414	2.83088	113	2.83088	145
2.83393	305	2.83393	477	2.83393	105	2.83393	137
2.83699	308	2.83699	444	2.83699	117	2.83699	137
2.84004	258	2.84004	442	2.84004	111	2.84004	129
2.84309	316	2.84309	486	2.84309	117	2.84309	160
2.84615	262	2.84615	424	2.84615	129	2.84615	134
2.8492	294	2.8492	419	2.8492	104	2.8492	134
2.85226	286	2.85226	420	2.85226	134	2.85226	147
2.85531	245	2.85531	419	2.85531	150	2.85531	151
2.85836	300	2.85836	439	2.85836	109	2.85836	130
2.86142	312	2.86142	389	2.86142	113	2.86142	141
2.86447	275	2.86447	472	2.86447	109	2.86447	142
2.86752	295	2.86752	411	2.86752	113	2.86752	117
2.87058	278	2.87058	417	2.87058	99	2.87058	136
2.87363	277	2.87363	425	2.87363	108	2.87363	119
2.87669	265	2.87669	453	2.87669	120	2.87669	132
2.87974	286	2.87974	423	2.87974	137	2.87974	142
2.88279	292	2.88279	480	2.88279	109	2.88279	133
2.88585	303	2.88585	413	2.88585	121	2.88585	112
2.8889	277	2.8889	402	2.8889	140	2.8889	119
2.89196	255	2.89196	406	2.89196	112	2.89196	118
2.89501	257	2.89501	439	2.89501	121	2.89501	121
2.89806	267	2.89806	391	2.89806	120	2.89806	124
2.90112	283	2.90112	416	2.90112	118	2.90112	139
2.90417	294	2.90417	413	2.90417	108	2.90417	126
2.90722	261	2.90722	402	2.90722	119	2.90722	128
2.91028	273	2.91028	447	2.91028	106	2.91028	125
2.91333	263	2.91333	389	2.91333	111	2.91333	99
2.91639	284	2.91639	424	2.91639	108	2.91639	119
2.91944	274	2.91944	425	2.91944	120	2.91944	124
2.92249	254	2.92249	414	2.92249	124	2.92249	133
2.92555	277	2.92555	407	2.92555	103	2.92555	119
2.9286	282	2.9286	446	2.9286	122	2.9286	141
2.93165	232	2.93165	388	2.93165	107	2.93165	141
2.93471	278	2.93471	402	2.93471	103	2.93471	126
2.93776	257	2.93776	424	2.93776	113	2.93776	118
2.94082	262	2.94082	377	2.94082	106	2.94082	117
2.94387	239	2.94387	384	2.94387	109	2.94387	124
2.94692	267	2.94692	399	2.94692	121	2.94692	128
2.94998	277	2.94998	382	2.94998	95	2.94998	153
2.95303	243	2.95303	426	2.95303	90	2.95303	117
2.95609	280	2.95609	357	2.95609	101	2.95609	129
2.95914	276	2.95914	352	2.95914	96	2.95914	115
2.96219	253	2.96219	357	2.96219	90	2.96219	134
2.96525	285	2.96525	371	2.96525	92	2.96525	119
2.9683	266	2.9683	407	2.9683	112	2.9683	115
2.97135	281	2.97135	390	2.97135	104	2.97135	140
2.97441	260	2.97441	378	2.97441	91	2.97441	119
2.97746	278	2.97746	357	2.97746	102	2.97746	134
2.98052	263	2.98052	417	2.98052	110	2.98052	118
2.98357	249	2.98357	370	2.98357	122	2.98357	116
2.98662	246	2.98662	384	2.98662	112	2.98662	104
2.98968	267	2.98968	388	2.98968	104	2.98968	116
2.99273	268	2.99273	386	2.99273	94	2.99273	116
2.99578	230	2.99578	369	2.99578	103	2.99578	126
2.99884	273	2.99884	381	2.99884	105	2.99884	108
3.00189	263	3.00189	365	3.00189	114	3.00189	113
3.00495	261	3.00495	389	3.00495	105	3.00495	144
3.008	265	3.008	364	3.008	88	3.008	111
3.01105	247	3.01105	381	3.01105	101	3.01105	121
3.01411	257	3.01411	393	3.01411	106	3.01411	112
3.01716	246	3.01716	372	3.01716	90	3.01716	105
3.02022	236	3.02022	392	3.02022	107	3.02022	112
3.02327	242	3.02327	341	3.02327	100	3.02327	111
3.02632	247	3.02632	363	3.02632	112	3.02632	116
3.02938	284	3.02938	355	3.02938	88	3.02938	122
3.03243	256	3.03243	364	3.03243	98	3.03243	117
3.03548	236	3.03548	379	3.03548	101	3.03548	117
3.03854	212	3.03854	371	3.03854	85	3.03854	114
3.04159	225	3.04159	370	3.04159	82	3.04159	118
3.04465	242	3.04465	353	3.04465	82	3.04465	100
3.0477	273	3.0477	333	3.0477	103	3.0477	113
3.05075	261	3.05075	333	3.05075	96	3.05075	86
3.05381	247	3.05381	383	3.05381	112	3.05381	113
3.05686	252	3.05686	368	3.05686	99	3.05686	101
3.05991	244	3.05991	367	3.05991	100	3.05991	120
3.06297	217	3.06297	368	3.06297	92	3.06297	117
3.06602	242	3.06602	362	3.06602	103	3.06602	109
3.06908	232	3.06908	365	3.06908	82	3.06908	113
3.07213	227	3.07213	365	3.07213	102	3.07213	107
3.07518	244	3.07518	386	3.07518	93	3.07518	95
3.07824	251	3.07824	329	3.07824	94	3.07824	95
3.08129	239	3.08129	321	3.08129	93	3.08129	101
3.08435	225	3.08435	327	3.08435	110	3.08435	123
3.0874	270	3.0874	386	3.0874	108	3.0874	87
3.09045	258	3.09045	354	3.09045	92	3.09045	137
3.09351	231	3.09351	305	3.09351	97	3.09351	111
3.09656	247	3.09656	377	3.09656	99	3.09656	85
3.09961	235	3.09961	347	3.09961	103	3.09961	105
3.10267	228	3.10267	335	3.10267	82	3.10267	104
3.10572	224	3.10572	368	3.10572	97	3.10572	106
3.10878	243	3.10878	308	3.10878	106	3.10878	103
3.11183	233	3.11183	360	3.11183	108	3.11183	101
3.11488	225	3.11488	329	3.11488	85	3.11488	87
3.11794	239	3.11794	334	3.11794	99	3.11794	94
3.12099	230	3.12099	335	3.12099	77	3.12099	121
3.12404	245	3.12404	347	3.12404	91	3.12404	78
3.1271	226	3.1271	322	3.1271	81	3.1271	123
3.13015	243	3.13015	336	3.13015	101	3.13015	111
3.13321	253	3.13321	350	3.13321	106	3.13321	109
3.13626	217	3.13626	360	3.13626	97	3.13626	116
3.13931	209	3.13931	329	3.13931	95	3.13931	86
3.14237	228	3.14237	339	3.14237	81	3.14237	82
3.14542	209	3.14542	304	3.14542	71	3.14542	116
3.14847	212	3.14847	316	3.14847	86	3.14847	97
3.15153	250	3.15153	348	3.15153	99	3.15153	91
3.15458	218	3.15458	338	3.15458	90	3.15458	100
3.15764	215	3.15764	309	3.15764	73	3.15764	95
3.16069	192	3.16069	307	3.16069	77	3.16069	97
3.16374	221	3.16374	329	3.16374	89	3.16374	97
3.1668	225	3.1668	289	3.1668	84	3.1668	86
3.16985	243	3.16985	284	3.16985	75	3.16985	118
3.17291	228	3.17291	297	3.17291	71	3.17291	100
3.17596	221	3.17596	302	3.17596	103	3.17596	103
3.17901	208	3.17901	314	3.17901	88	3.17901	99
3.18207	189	3.18207	313	3.18207	79	3.18207	96
3.18512	210	3.18512	362	3.18512	96	3.18512	99
3.18817	209	3.18817	305	3.18817	85	3.18817	83
3.19123	238	3.19123	301	3.19123	74	3.19123	107
3.19428	202	3.19428	281	3.19428	80	3.19428	91
3.19734	221	3.19734	321	3.19734	105	3.19734	95
3.20039	225	3.20039	329	3.20039	91	3.20039	91
3.20344	224	3.20344	341	3.20344	83	3.20344	80
3.2065	223	3.2065	282	3.2065	79	3.2065	89
3.20955	191	3.20955	324	3.20955	73	3.20955	84
3.2126	203	3.2126	326	3.2126	84	3.2126	95
3.21566	220	3.21566	293	3.21566	89	3.21566	116
3.21871	209	3.21871	306	3.21871	89	3.21871	112
3.22177	219	3.22177	319	3.22177	101	3.22177	105
3.22482	205	3.22482	333	3.22482	90	3.22482	99
3.22787	230	3.22787	299	3.22787	76	3.22787	106
3.23093	204	3.23093	323	3.23093	78	3.23093	95
3.23398	197	3.23398	356	3.23398	80	3.23398	88
3.23704	221	3.23704	298	3.23704	81	3.23704	80
3.24009	180	3.24009	352	3.24009	80	3.24009	77
3.24314	201	3.24314	297	3.24314	81	3.24314	108
3.2462	206	3.2462	323	3.2462	83	3.2462	86
3.24925	213	3.24925	325	3.24925	89	3.24925	103
3.2523	197	3.2523	298	3.2523	91	3.2523	72
3.25536	209	3.25536	280	3.25536	78	3.25536	81
3.25841	188	3.25841	271	3.25841	87	3.25841	95
3.26147	179	3.26147	302	3.26147	82	3.26147	84
3.26452	219	3.26452	314	3.26452	88	3.26452	83
3.26757	216	3.26757	294	3.26757	61	3.26757	93
3.27063	201	3.27063	287	3.27063	67	3.27063	79
3.27368	209	3.27368	257	3.27368	76	3.27368	89
3.27673	186	3.27673	283	3.27673	83	3.27673	88
3.27979	179	3.27979	302	3.27979	78	3.27979	93
3.28284	183	3.28284	271	3.28284	82	3.28284	92
3.2859	182	3.2859	243	3.2859	75	3.2859	100
3.28895	203	3.28895	275	3.28895	84	3.28895	87
3.292	207	3.292	309	3.292	81	3.292	86
3.29506	184	3.29506	310	3.29506	62	3.29506	58
3.29811	175	3.29811	288	3.29811	78	3.29811	76
3.30117	190	3.30117	290	3.30117	80	3.30117	76
3.30422	194	3.30422	270	3.30422	85	3.30422	92
3.30727	209	3.30727	299	3.30727	89	3.30727	96
3.31033	190	3.31033	305	3.31033	89	3.31033	84
3.31338	204	3.31338	266	3.31338	85	3.31338	77
3.31643	181	3.31643	295	3.31643	74	3.31643	82
3.31949	185	3.31949	278	3.31949	77	3.31949	89
3.32254	200	3.32254	278	3.32254	67	3.32254	77
3.3256	188	3.3256	269	3.3256	83	3.3256	104
3.32865	165	3.32865	297	3.32865	78	3.32865	78
3.3317	202	3.3317	251	3.3317	72	3.3317	71
3.33476	184	3.33476	277	3.33476	74	3.33476	108
3.33781	175	3.33781	274	3.33781	65	3.33781	70
3.34086	168	3.34086	289	3.34086	86	3.34086	80
3.34392	152	3.34392	296	3.34392	60	3.34392	77
3.34697	186	3.34697	263	3.34697	78	3.34697	93
3.35003	171	3.35003	257	3.35003	69	3.35003	86
3.35308	176	3.35308	277	3.35308	80	3.35308	73
3.35613	187	3.35613	268	3.35613	72	3.35613	94
3.35919	189	3.35919	307	3.35919	73	3.35919	93
3.36224	169	3.36224	304	3.36224	72	3.36224	74
3.3653	196	3.3653	255	3.3653	83	3.3653	83
3.36835	176	3.36835	269	3.36835	70	3.36835	88
3.3714	188	3.3714	261	3.3714	72	3.3714	86
3.37446	176	3.37446	253	3.37446	69	3.37446	86
3.37751	182	3.37751	287	3.37751	71	3.37751	74
3.38056	183	3.38056	259	3.38056	71	3.38056	75
3.38362	187	3.38362	262	3.38362	70	3.38362	64
3.38667	184	3.38667	284	3.38667	81	3.38667	78
3.38973	179	3.38973	288	3.38973	69	3.38973	80
3.39278	174	3.39278	268	3.39278	79	3.39278	101
3.39583	169	3.39583	235	3.39583	73	3.39583	76
3.39889	185	3.39889	277	3.39889	60	3.39889	77
3.40194	161	3.40194	229	3.40194	65	3.40194	87
3.40499	180	3.40499	264	3.40499	80	3.40499	79
3.40805	167	3.40805	250	3.40805	65	3.40805	81
3.4111	177	3.4111	245	3.4111	75	3.4111	79
3.41416	199	3.41416	247	3.41416	79	3.41416	86
3.41721	175	3.41721	254	3.41721	82	3.41721	72
3.42026	156	3.42026	238	3.42026	65	3.42026	82
3.42332	155	3.42332	254	3.42332	51	3.42332	80
3.42637	167	3.42637	247	3.42637	79	3.42637	85
3.42943	158	3.42943	254	3.42943	71	3.42943	79
3.43248	174	3.43248	233	3.43248	64	3.43248	82
3.43553	166	3.43553	237	3.43553	66	3.43553	72
3.43859	178	3.43859	255	3.43859	67	3.43859	74
3.44164	169	3.44164	221	3.44164	63	3.44164	82
3.44469	181	3.44469	221	3.44469	73	3.44469	80
3.44775	164	3.44775	258	3.44775	71	3.44775	86
3.4508	191	3.4508	234	3.4508	64	3.4508	77
3.45386	178	3.45386	267	3.45386	82	3.45386	63
3.45691	175	3.45691	228	3.45691	79	3.45691	83
3.45996	156	3.45996	258	3.45996	77	3.45996	84
3.46302	178	3.46302	252	3.46302	47	3.46302	81
3.46607	168	3.46607	230	3.46607	57	3.46607	73
3.46912	171	3.46912	260	3.46912	62	3.46912	65
3.47218	157	3.47218	268	3.47218	57	3.47218	75
3.47523	179	3.47523	262	3.47523	64	3.47523	79
3.47829	157	3.47829	227	3.47829	64	3.47829	72
3.48134	159	3.48134	248	3.48134	50	3.48134	73
3.48439	169	3.48439	230	3.48439	66	3.48439	79
3.48745	180	3.48745	231	3.48745	73	3.48745	86
3.4905	172	3.4905	259	3.4905	66	3.4905	70
3.49356	180	3.49356	243	3.49356	73	3.49356	89
3.49661	164	3.49661	223	3.49661	66	3.49661	65
3.49966	162	3.49966	239	3.49966	57	3.49966	74
3.50272	157	3.50272	216	3.50272	63	3.50272	64
3.50577	182	3.50577	220	3.50577	64	3.50577	67
3.50882	161	3.50882	234	3.50882	76	3.50882	66
3.51188	157	3.51188	223	3.51188	78	3.51188	77
3.51493	144	3.51493	250	3.51493	62	3.51493	79
3.51799	165	3.51799	243	3.51799	64	3.51799	79
3.52104	154	3.52104	245	3.52104	49	3.52104	81
3.52409	168	3.52409	212	3.52409	66	3.52409	68
3.52715	165	3.52715	209	3.52715	58	3.52715	56
3.5302	151	3.5302	225	3.5302	55	3.5302	57
3.53325	142	3.53325	245	3.53325	56	3.53325	56
3.53631	181	3.53631	228	3.53631	70	3.53631	70
3.53936	163	3.53936	230	3.53936	71	3.53936	70
3.54242	174	3.54242	238	3.54242	47	3.54242	91
3.54547	162	3.54547	226	3.54547	69	3.54547	70
3.54852	151	3.54852	219	3.54852	68	3.54852	75
3.55158	165	3.55158	233	3.55158	50	3.55158	79
3.55463	166	3.55463	237	3.55463	63	3.55463	75
3.55769	152	3.55769	252	3.55769	57	3.55769	69
3.56074	162	3.56074	211	3.56074	56	3.56074	75
3.56379	164	3.56379	217	3.56379	61	3.56379	76
3.56685	158	3.56685	236	3.56685	68	3.56685	71
3.5699	153	3.5699	201	3.5699	57	3.5699	64
3.57295	163	3.57295	228	3.57295	59	3.57295	82
3.57601	144	3.57601	253	3.57601	72	3.57601	76
3.57906	140	3.57906	248	3.57906	53	3.57906	84
3.58212	173	3.58212	236	3.58212	51	3.58212	75
3.58517	146	3.58517	205	3.58517	56	3.58517	72
3.58822	163	3.58822	220	3.58822	62	3.58822	56
3.59128	179	3.59128	252	3.59128	61	3.59128	75
3.59433	159	3.59433	218	3.59433	62	3.59433	60
3.59738	131	3.59738	237	3.59738	59	3.59738	54
3.60044	169	3.60044	226	3.60044	73	3.60044	57
3.60349	135	3.60349	219	3.60349	56	3.60349	62
3.60655	178	3.60655	215	3.60655	62	3.60655	64
3.6096	141	3.6096	228	3.6096	61	3.6096	78
3.61265	153	3.61265	225	3.61265	57	3.61265	79
3.61571	163	3.61571	220	3.61571	50	3.61571	56
3.61876	150	3.61876	208	3.61876	76	3.61876	64
3.62182	127	3.62182	222	3.62182	56	3.62182	73
3.62487	144	3.62487	220	3.62487	58	3.62487	68
3.62792	145	3.62792	208	3.62792	63	3.62792	73
3.63098	179	3.63098	224	3.63098	55	3.63098	64
3.63403	150	3.63403	244	3.63403	60	3.63403	76
3.63708	164	3.63708	211	3.63708	72	3.63708	77
3.64014	160	3.64014	234	3.64014	58	3.64014	70
3.64319	137	3.64319	223	3.64319	55	3.64319	72
3.64625	155	3.64625	233	3.64625	62	3.64625	62
3.6493	131	3.6493	236	3.6493	68	3.6493	77
3.65235	133	3.65235	242	3.65235	53	3.65235	70
3.65541	156	3.65541	208	3.65541	61	3.65541	76
3.65846	135	3.65846	210	3.65846	64	3.65846	72
3.66151	139	3.66151	209	3.66151	53	3.66151	80
3.66457	172	3.66457	229	3.66457	53	3.66457	57
3.66762	130	3.66762	183	3.66762	50	3.66762	68
3.67068	134	3.67068	191	3.67068	44	3.67068	68
3.67373	129	3.67373	239	3.67373	64	3.67373	60
3.67678	148	3.67678	238	3.67678	60	3.67678	69
3.67984	130	3.67984	207	3.67984	61	3.67984	64
3.68289	178	3.68289	223	3.68289	51	3.68289	60
3.68594	140	3.68594	218	3.68594	52	3.68594	70
3.689	140	3.689	210	3.689	58	3.689	71
3.69205	173	3.69205	197	3.69205	60	3.69205	61
3.69511	140	3.69511	170	3.69511	62	3.69511	63
3.69816	142	3.69816	198	3.69816	63	3.69816	67
3.70121	125	3.70121	224	3.70121	53	3.70121	67
3.70427	139	3.70427	207	3.70427	38	3.70427	62
3.70732	150	3.70732	220	3.70732	70	3.70732	59
3.71038	139	3.71038	168	3.71038	53	3.71038	55
3.71343	165	3.71343	202	3.71343	48	3.71343	61
3.71648	139	3.71648	189	3.71648	52	3.71648	53
3.71954	146	3.71954	210	3.71954	43	3.71954	58
3.72259	135	3.72259	205	3.72259	62	3.72259	69
3.72564	142	3.72564	188	3.72564	54	3.72564	58
3.7287	120	3.7287	182	3.7287	59	3.7287	64
3.73175	142	3.73175	199	3.73175	75	3.73175	61
3.73481	153	3.73481	200	3.73481	65	3.73481	76
3.73786	146	3.73786	199	3.73786	43	3.73786	64
3.74091	109	3.74091	194	3.74091	50	3.74091	57
3.74397	137	3.74397	196	3.74397	56	3.74397	72
3.74702	139	3.74702	194	3.74702	56	3.74702	47
3.75007	132	3.75007	191	3.75007	52	3.75007	50
3.75313	127	3.75313	182	3.75313	54	3.75313	66
3.75618	148	3.75618	195	3.75618	49	3.75618	68
3.75924	140	3.75924	206	3.75924	54	3.75924	58
3.76229	143	3.76229	178	3.76229	68	3.76229	60
3.76534	123	3.76534	199	3.76534	54	3.76534	62
3.7684	141	3.7684	199	3.7684	53	3.7684	56
3.77145	137	3.77145	206	3.77145	42	3.77145	61
3.77451	137	3.77451	191	3.77451	63	3.77451	64
3.77756	138	3.77756	194	3.77756	65	3.77756	53
3.78061	169	3.78061	208	3.78061	57	3.78061	58
3.78367	135	3.78367	193	3.78367	56	3.78367	65
3.78672	125	3.78672	214	3.78672	42	3.78672	70
3.78977	133	3.78977	185	3.78977	46	3.78977	70
3.79283	135	3.79283	201	3.79283	56	3.79283	64
3.79588	131	3.79588	163	3.79588	53	3.79588	62
3.79894	143	3.79894	186	3.79894	38	3.79894	57
3.80199	127	3.80199	184	3.80199	45	3.80199	54
3.80504	136	3.80504	182	3.80504	56	3.80504	52
3.8081	138	3.8081	185	3.8081	47	3.8081	79
3.81115	144	3.81115	191	3.81115	73	3.81115	65
3.8142	107	3.8142	197	3.8142	51	3.8142	67
3.81726	129	3.81726	190	3.81726	53	3.81726	49
3.82031	142	3.82031	192	3.82031	40	3.82031	60
3.82337	128	3.82337	188	3.82337	57	3.82337	69
3.82642	135	3.82642	216	3.82642	51	3.82642	59
3.82947	115	3.82947	212	3.82947	51	3.82947	52
3.83253	127	3.83253	206	3.83253	45	3.83253	48
3.83558	116	3.83558	177	3.83558	52	3.83558	65
3.83864	122	3.83864	176	3.83864	41	3.83864	51
3.84169	130	3.84169	191	3.84169	52	3.84169	59
3.84474	124	3.84474	183	3.84474	40	3.84474	54
3.8478	109	3.8478	179	3.8478	43	3.8478	63
3.85085	117	3.85085	180	3.85085	59	3.85085	53
3.8539	137	3.8539	173	3.8539	38	3.8539	57
3.85696	139	3.85696	182	3.85696	47	3.85696	48
3.86001	129	3.86001	189	3.86001	56	3.86001	69
3.86307	119	3.86307	169	3.86307	53	3.86307	59
3.86612	127	3.86612	195	3.86612	60	3.86612	51
3.86917	120	3.86917	189	3.86917	64	3.86917	60
3.87223	134	3.87223	193	3.87223	41	3.87223	54
3.87528	126	3.87528	148	3.87528	52	3.87528	61
3.87833	155	3.87833	185	3.87833	42	3.87833	60
3.88139	118	3.88139	189	3.88139	54	3.88139	47
3.88444	131	3.88444	170	3.88444	40	3.88444	50
3.8875	116	3.8875	182	3.8875	59	3.8875	55
3.89055	121	3.89055	176	3.89055	52	3.89055	49
3.8936	115	3.8936	151	3.8936	46	3.8936	55
3.89666	133	3.89666	166	3.89666	35	3.89666	50
3.89971	112	3.89971	186	3.89971	38	3.89971	61
3.90277	95	3.90277	163	3.90277	44	3.90277	56
3.90582	125	3.90582	165	3.90582	45	3.90582	48
3.90887	131	3.90887	162	3.90887	50	3.90887	48
3.91193	152	3.91193	173	3.91193	44	3.91193	58
3.91498	141	3.91498	165	3.91498	48	3.91498	52
3.91803	131	3.91803	185	3.91803	50	3.91803	62
3.92109	114	3.92109	199	3.92109	51	3.92109	51
3.92414	120	3.92414	172	3.92414	40	3.92414	47
3.9272	120	3.9272	168	3.9272	40	3.9272	53
3.93025	113	3.93025	171	3.93025	50	3.93025	60
3.9333	112	3.9333	176	3.9333	45	3.9333	50
3.93636	124	3.93636	181	3.93636	57	3.93636	43
3.93941	111	3.93941	196	3.93941	60	3.93941	55
3.94246	120	3.94246	161	3.94246	45	3.94246	50
3.94552	118	3.94552	203	3.94552	49	3.94552	59
3.94857	118	3.94857	173	3.94857	51	3.94857	48
3.95163	119	3.95163	169	3.95163	32	3.95163	51
3.95468	118	3.95468	179	3.95468	44	3.95468	49
3.95773	97	3.95773	167	3.95773	37	3.95773	57
3.96079	112	3.96079	154	3.96079	36	3.96079	41
3.96384	97	3.96384	178	3.96384	42	3.96384	49
3.9669	107	3.9669	160	3.9669	49	3.9669	51
3.96995	106	3.96995	178	3.96995	49	3.96995	51
3.973	115	3.973	161	3.973	53	3.973	46
3.97606	125	3.97606	149	3.97606	67	3.97606	51
3.97911	98	3.97911	166	3.97911	38	3.97911	51
3.98216	109	3.98216	165	3.98216	56	3.98216	51
3.98522	123	3.98522	174	3.98522	42	3.98522	51
3.98827	118	3.98827	158	3.98827	49	3.98827	59
3.99133	111	3.99133	179	3.99133	46	3.99133	54
3.99438	118	3.99438	173	3.99438	60	3.99438	59
3.99743	98	3.99743	180	3.99743	42	3.99743	53
4.00049	96	4.00049	166	4.00049	41	4.00049	68
4.00354	120	4.00354	173	4.00354	40	4.00354	66
4.00659	104	4.00659	185	4.00659	40	4.00659	48
4.00965	110	4.00965	160	4.00965	50	4.00965	45
4.0127	108	4.0127	180	4.0127	42	4.0127	56
4.01576	120	4.01576	143	4.01576	61	4.01576	58
4.01881	139	4.01881	152	4.01881	59	4.01881	54
4.02186	108	4.02186	167	4.02186	48	4.02186	49
4.02492	105	4.02492	141	4.02492	46	4.02492	49
4.02797	127	4.02797	148	4.02797	64	4.02797	51
4.03103	129	4.03103	163	4.03103	43	4.03103	63
4.03408	124	4.03408	184	4.03408	55	4.03408	49
4.03713	93	4.03713	165	4.03713	48	4.03713	60
4.04019	109	4.04019	175	4.04019	43	4.04019	56
4.04324	102	4.04324	153	4.04324	40	4.04324	55
4.04629	106	4.04629	155	4.04629	43	4.04629	47
4.04935	121	4.04935	170	4.04935	35	4.04935	58
4.0524	111	4.0524	156	4.0524	47	4.0524	48
4.05546	120	4.05546	170	4.05546	51	4.05546	44
4.05851	120	4.05851	172	4.05851	45	4.05851	45
4.06156	111	4.06156	158	4.06156	45	4.06156	56
4.06462	111	4.06462	156	4.06462	45	4.06462	59
4.06767	109	4.06767	182	4.06767	31	4.06767	61
4.07072	117	4.07072	162	4.07072	40	4.07072	39
4.07378	108	4.07378	163	4.07378	32	4.07378	54
4.07683	106	4.07683	168	4.07683	45	4.07683	53
4.07989	109	4.07989	154	4.07989	41	4.07989	49
4.08294	119	4.08294	142	4.08294	58	4.08294	53
4.08599	107	4.08599	170	4.08599	35	4.08599	39
4.08905	122	4.08905	162	4.08905	42	4.08905	49
4.0921	89	4.0921	157	4.0921	41	4.0921	52
4.09516	102	4.09516	163	4.09516	35	4.09516	63
4.09821	106	4.09821	143	4.09821	37	4.09821	45
4.10126	123	4.10126	173	4.10126	30	4.10126	58
4.10432	92	4.10432	137	4.10432	46	4.10432	44
4.10737	99	4.10737	130	4.10737	49	4.10737	55
4.11042	105	4.11042	139	4.11042	39	4.11042	40
4.11348	108	4.11348	159	4.11348	49	4.11348	46
4.11653	106	4.11653	158	4.11653	31	4.11653	60
4.11959	91	4.11959	151	4.11959	37	4.11959	53
4.12264	108	4.12264	158	4.12264	44	4.12264	44
4.12569	105	4.12569	156	4.12569	46	4.12569	53
4.12875	111	4.12875	161	4.12875	42	4.12875	59
4.1318	110	4.1318	159	4.1318	41	4.1318	54
4.13485	94	4.13485	133	4.13485	38	4.13485	64
4.13791	90	4.13791	150	4.13791	35	4.13791	51
4.14096	104	4.14096	177	4.14096	36	4.14096	49
4.14402	109	4.14402	159	4.14402	40	4.14402	51
4.14707	105	4.14707	142	4.14707	46	4.14707	54
4.15012	115	4.15012	182	4.15012	31	4.15012	52
4.15318	94	4.15318	134	4.15318	32	4.15318	55
4.15623	117	4.15623	163	4.15623	49	4.15623	44
4.15929	85	4.15929	132	4.15929	37	4.15929	41
4.16234	97	4.16234	143	4.16234	34	4.16234	46
4.16539	116	4.16539	166	4.16539	47	4.16539	49
4.16845	117	4.16845	145	4.16845	43	4.16845	37
4.1715	98	4.1715	173	4.1715	34	4.1715	40
4.17455	100	4.17455	158	4.17455	36	4.17455	52
4.17761	122	4.17761	144	4.17761	31	4.17761	47
4.18066	98	4.18066	147	4.18066	45	4.18066	55
4.18372	90	4.18372	145	4.18372	39	4.18372	49
4.18677	104	4.18677	149	4.18677	37	4.18677	48
4.18982	87	4.18982	135	4.18982	41	4.18982	53
4.19288	92	4.19288	130	4.19288	44	4.19288	62
4.19593	88	4.19593	146	4.19593	46	4.19593	38
4.19898	104	4.19898	160	4.19898	44	4.19898	39
4.20204	92	4.20204	158	4.20204	44	4.20204	47
4.20509	97	4.20509	109	4.20509	46	4.20509	47
4.20815	93	4.20815	136	4.20815	47	4.20815	44
4.2112	96	4.2112	149	4.2112	33	4.2112	44
4.21425	109	4.21425	132	4.21425	38	4.21425	45
4.21731	84	4.21731	136	4.21731	49	4.21731	25
4.22036	112	4.22036	126	4.22036	28	4.22036	45
4.22342	113	4.22342	161	4.22342	33	4.22342	45
4.22647	107	4.22647	123	4.22647	34	4.22647	53
4.22952	88	4.22952	143	4.22952	40	4.22952	52
4.23258	94	4.23258	168	4.23258	42	4.23258	54
4.23563	97	4.23563	121	4.23563	32	4.23563	43
4.23868	102	4.23868	132	4.23868	34	4.23868	44
4.24174	101	4.24174	168	4.24174	44	4.24174	40
4.24479	105	4.24479	138	4.24479	27	4.24479	38
4.24785	82	4.24785	126	4.24785	32	4.24785	49
4.2509	84	4.2509	156	4.2509	39	4.2509	43
4.25395	93	4.25395	144	4.25395	37	4.25395	52
4.25701	109	4.25701	140	4.25701	38	4.25701	31
4.26006	83	4.26006	141	4.26006	26	4.26006	56
4.26311	85	4.26311	133	4.26311	33	4.26311	46
4.26617	81	4.26617	143	4.26617	31	4.26617	44
4.26922	94	4.26922	136	4.26922	36	4.26922	40
4.27228	78	4.27228	121	4.27228	33	4.27228	43
4.27533	95	4.27533	136	4.27533	38	4.27533	41
4.27838	89	4.27838	157	4.27838	40	4.27838	58
4.28144	93	4.28144	139	4.28144	34	4.28144	43
4.28449	90	4.28449	133	4.28449	34	4.28449	44
4.28754	95	4.28754	137	4.28754	42	4.28754	39
4.2906	94	4.2906	141	4.2906	34	4.2906	39
4.29365	96	4.29365	149	4.29365	40	4.29365	39
4.29671	100	4.29671	128	4.29671	34	4.29671	33
4.29976	85	4.29976	152	4.29976	38	4.29976	54
4.30281	82	4.30281	139	4.30281	37	4.30281	45
4.30587	107	4.30587	138	4.30587	41	4.30587	39
4.30892	86	4.30892	113	4.30892	28	4.30892	43
4.31198	103	4.31198	126	4.31198	40	4.31198	48
4.31503	99	4.31503	130	4.31503	42	4.31503	42
4.31808	95	4.31808	137	4.31808	40	4.31808	48
4.32114	89	4.32114	127	4.32114	36	4.32114	44
4.32419	81	4.32419	126	4.32419	41	4.32419	42
4.32724	90	4.32724	116	4.32724	37	4.32724	49
4.3303	97	4.3303	143	4.3303	38	4.3303	39
4.33335	79	4.33335	132	4.33335	33	4.33335	48
4.33641	86	4.33641	148	4.33641	38	4.33641	28
4.33946	93	4.33946	126	4.33946	48	4.33946	42
4.34251	98	4.34251	145	4.34251	43	4.34251	46
4.34557	107	4.34557	118	4.34557	37	4.34557	43
4.34862	88	4.34862	113	4.34862	32	4.34862	47
4.35167	91	4.35167	123	4.35167	41	4.35167	54
4.35473	83	4.35473	146	4.35473	33	4.35473	39
4.35778	84	4.35778	134	4.35778	32	4.35778	43
4.36084	84	4.36084	136	4.36084	39	4.36084	58
4.36389	78	4.36389	112	4.36389	36	4.36389	51
4.36694	81	4.36694	140	4.36694	35	4.36694	35
4.37	84	4.37	123	4.37	38	4.37	41
4.37305	80	4.37305	122	4.37305	33	4.37305	48
4.37611	104	4.37611	146	4.37611	50	4.37611	43
4.37916	87	4.37916	133	4.37916	36	4.37916	37
4.38221	113	4.38221	137	4.38221	33	4.38221	50
4.38527	99	4.38527	154	4.38527	27	4.38527	56
4.38832	99	4.38832	128	4.38832	36	4.38832	40
4.39137	91	4.39137	111	4.39137	35	4.39137	36
4.39443	88	4.39443	122	4.39443	40	4.39443	27
4.39748	81	4.39748	133	4.39748	34	4.39748	41
4.40054	97	4.40054	126	4.40054	36	4.40054	44
4.40359	89	4.40359	123	4.40359	40	4.40359	47
4.40664	83	4.40664	146	4.40664	36	4.40664	44
4.4097	77	4.4097	117	4.4097	32	4.4097	48
4.41275	93	4.41275	129	4.41275	43	4.41275	47
4.4158	89	4.4158	125	4.4158	40	4.4158	42
4.41886	108	4.41886	131	4.41886	31	4.41886	35
4.42191	108	4.42191	129	4.42191	38	4.42191	42
4.42497	101	4.42497	116	4.42497	42	4.42497	39
4.42802	85	4.42802	136	4.42802	30	4.42802	45
4.43107	85	4.43107	117	4.43107	35	4.43107	26
4.43413	102	4.43413	122	4.43413	37	4.43413	52
4.43718	101	4.43718	132	4.43718	28	4.43718	42
4.44024	85	4.44024	134	4.44024	25	4.44024	24
4.44329	73	4.44329	126	4.44329	39	4.44329	43
4.44634	100	4.44634	127	4.44634	40	4.44634	44
4.4494	72	4.4494	141	4.4494	34	4.4494	31
4.45245	94	4.45245	145	4.45245	26	4.45245	34
4.4555	90	4.4555	120	4.4555	29	4.4555	37
4.45856	86	4.45856	140	4.45856	31	4.45856	38
4.46161	99	4.46161	136	4.46161	33	4.46161	36
4.46467	94	4.46467	122	4.46467	35	4.46467	50
4.46772	99	4.46772	104	4.46772	39	4.46772	37
4.47077	93	4.47077	124	4.47077	34	4.47077	33
4.47383	71	4.47383	126	4.47383	36	4.47383	45
4.47688	76	4.47688	108	4.47688	37	4.47688	29
4.47993	93	4.47993	112	4.47993	29	4.47993	31
4.48299	78	4.48299	104	4.48299	31	4.48299	40
4.48604	103	4.48604	134	4.48604	23	4.48604	29
4.4891	96	4.4891	141	4.4891	28	4.4891	37
4.49215	82	4.49215	104	4.49215	32	4.49215	40
4.4952	96	4.4952	123	4.4952	25	4.4952	33
4.49826	97	4.49826	124	4.49826	32	4.49826	38
4.50131	81	4.50131	130	4.50131	35	4.50131	37
4.50437	85	4.50437	102	4.50437	44	4.50437	36
4.50742	87	4.50742	111	4.50742	36	4.50742	31
4.51047	86	4.51047	109	4.51047	32	4.51047	31
4.51353	92	4.51353	120	4.51353	38	4.51353	36
4.51658	100	4.51658	115	4.51658	36	4.51658	39
4.51963	80	4.51963	126	4.51963	28	4.51963	42
4.52269	85	4.52269	127	4.52269	40	4.52269	35
4.52574	72	4.52574	109	4.52574	26	4.52574	40
4.5288	69	4.5288	108	4.5288	26	4.5288	36
4.53185	71	4.53185	100	4.53185	36	4.53185	44
4.5349	72	4.5349	137	4.5349	30	4.5349	39
4.53796	81	4.53796	139	4.53796	27	4.53796	38
4.54101	99	4.54101	109	4.54101	44	4.54101	38
4.54406	87	4.54406	122	4.54406	34	4.54406	38
4.54712	74	4.54712	124	4.54712	25	4.54712	42
4.55017	93	4.55017	113	4.55017	30	4.55017	45
4.55323	81	4.55323	102	4.55323	44	4.55323	48
4.55628	99	4.55628	107	4.55628	33	4.55628	33
4.55933	81	4.55933	109	4.55933	31	4.55933	30
4.56239	75	4.56239	110	4.56239	37	4.56239	34
4.56544	80	4.56544	135	4.56544	49	4.56544	35
4.5685	73	4.5685	101	4.5685	33	4.5685	33
4.57155	85	4.57155	122	4.57155	49	4.57155	39
4.5746	84	4.5746	114	4.5746	33	4.5746	45
4.57766	74	4.57766	117	4.57766	29	4.57766	39
4.58071	82	4.58071	111	4.58071	28	4.58071	42
4.58376	77	4.58376	101	4.58376	32	4.58376	35
4.58682	72	4.58682	93	4.58682	42	4.58682	43
4.58987	83	4.58987	109	4.58987	31	4.58987	39
4.59293	75	4.59293	115	4.59293	22	4.59293	45
4.59598	73	4.59598	113	4.59598	32	4.59598	40
4.59903	64	4.59903	121	4.59903	26	4.59903	35
4.60209	89	4.60209	103	4.60209	25	4.60209	43
4.60514	67	4.60514	98	4.60514	38	4.60514	38
4.60819	71	4.60819	104	4.60819	26	4.60819	26
4.61125	68	4.61125	99	4.61125	30	4.61125	43
4.6143	75	4.6143	110	4.6143	38	4.6143	41
4.61736	84	4.61736	109	4.61736	33	4.61736	18
4.62041	84	4.62041	100	4.62041	28	4.62041	39
4.62346	73	4.62346	123	4.62346	22	4.62346	36
4.62652	76	4.62652	129	4.62652	22	4.62652	34
4.62957	71	4.62957	99	4.62957	38	4.62957	42
4.63263	65	4.63263	122	4.63263	36	4.63263	24
4.63568	67	4.63568	98	4.63568	28	4.63568	34
4.63873	78	4.63873	105	4.63873	35	4.63873	49
4.64179	64	4.64179	129	4.64179	25	4.64179	26
4.64484	78	4.64484	126	4.64484	28	4.64484	32
4.64789	86	4.64789	110	4.64789	19	4.64789	30
4.65095	76	4.65095	112	4.65095	32	4.65095	31
4.654	65	4.654	112	4.654	39	4.654	34
4.65706	77	4.65706	121	4.65706	29	4.65706	32
4.66011	78	4.66011	135	4.66011	22	4.66011	39
4.66316	72	4.66316	114	4.66316	28	4.66316	32
4.66622	81	4.66622	101	4.66622	31	4.66622	36
4.66927	74	4.66927	91	4.66927	29	4.66927	34
4.67232	77	4.67232	103	4.67232	30	4.67232	28
4.67538	72	4.67538	111	4.67538	36	4.67538	42
4.67843	73	4.67843	125	4.67843	31	4.67843	34
4.68149	79	4.68149	96	4.68149	31	4.68149	28
4.68454	91	4.68454	103	4.68454	25	4.68454	36
4.68759	73	4.68759	113	4.68759	23	4.68759	39
4.69065	82	4.69065	104	4.69065	29	4.69065	33
4.6937	77	4.6937	90	4.6937	27	4.6937	41
4.69676	67	4.69676	112	4.69676	32	4.69676	39
4.69981	71	4.69981	96	4.69981	25	4.69981	42
4.70286	69	4.70286	101	4.70286	18	4.70286	39
4.70592	84	4.70592	99	4.70592	29	4.70592	27
4.70897	95	4.70897	125	4.70897	36	4.70897	39
4.71202	85	4.71202	120	4.71202	25	4.71202	42
4.71508	74	4.71508	78	4.71508	22	4.71508	31
4.71813	82	4.71813	80	4.71813	25	4.71813	34
4.72119	70	4.72119	96	4.72119	26	4.72119	30
4.72424	68	4.72424	102	4.72424	26	4.72424	43
4.72729	67	4.72729	118	4.72729	39	4.72729	30
4.73035	66	4.73035	83	4.73035	33	4.73035	36
4.7334	55	4.7334	106	4.7334	27	4.7334	35
4.73645	80	4.73645	110	4.73645	30	4.73645	32
4.73951	70	4.73951	108	4.73951	25	4.73951	35
4.74256	72	4.74256	111	4.74256	24	4.74256	37
4.74562	65	4.74562	117	4.74562	44	4.74562	34
4.74867	79	4.74867	101	4.74867	20	4.74867	38
4.75172	74	4.75172	82	4.75172	41	4.75172	32
4.75478	73	4.75478	117	4.75478	29	4.75478	31
4.75783	58	4.75783	101	4.75783	27	4.75783	26
4.76089	75	4.76089	92	4.76089	29	4.76089	35
4.76394	76	4.76394	106	4.76394	32	4.76394	31
4.76699	70	4.76699	94	4.76699	28	4.76699	29
4.77005	67	4.77005	99	4.77005	24	4.77005	28
4.7731	63	4.7731	100	4.7731	30	4.7731	34
4.77615	74	4.77615	104	4.77615	28	4.77615	31
4.77921	82	4.77921	105	4.77921	30	4.77921	27
4.78226	65	4.78226	104	4.78226	37	4.78226	39
4.78532	78	4.78532	113	4.78532	28	4.78532	31
4.78837	57	4.78837	76	4.78837	26	4.78837	38
4.79142	65	4.79142	102	4.79142	36	4.79142	31
4.79448	60	4.79448	95	4.79448	19	4.79448	31
4.79753	85	4.79753	97	4.79753	27	4.79753	36
4.80058	86	4.80058	100	4.80058	34	4.80058	33
4.80364	79	4.80364	90	4.80364	28	4.80364	26
4.80669	75	4.80669	69	4.80669	25	4.80669	35
4.80975	66	4.80975	85	4.80975	23	4.80975	36
4.8128	58	4.8128	105	4.8128	42	4.8128	43
4.81585	82	4.81585	108	4.81585	34	4.81585	32
4.81891	62	4.81891	100	4.81891	20	4.81891	38
4.82196	71	4.82196	97	4.82196	30	4.82196	30
4.82501	66	4.82501	90	4.82501	38	4.82501	35
4.82807	55	4.82807	108	4.82807	37	4.82807	37
4.83112	75	4.83112	89	4.83112	30	4.83112	33
4.83418	60	4.83418	80	4.83418	33	4.83418	35
4.83723	67	4.83723	86	4.83723	38	4.83723	30
4.84028	74	4.84028	98	4.84028	31	4.84028	38
4.84334	76	4.84334	101	4.84334	39	4.84334	28
4.84639	61	4.84639	110	4.84639	27	4.84639	38
4.84945	71	4.84945	104	4.84945	24	4.84945	38
4.8525	70	4.8525	100	4.8525	16	4.8525	31
4.85555	66	4.85555	111	4.85555	25	4.85555	44
4.85861	67	4.85861	90	4.85861	27	4.85861	19
4.86166	61	4.86166	93	4.86166	27	4.86166	41
4.86471	66	4.86471	79	4.86471	20	4.86471	27
4.86777	67	4.86777	113	4.86777	26	4.86777	36
4.87082	64	4.87082	93	4.87082	23	4.87082	33
4.87388	66	4.87388	103	4.87388	23	4.87388	23
4.87693	69	4.87693	104	4.87693	26	4.87693	30
4.87998	57	4.87998	94	4.87998	30	4.87998	34
4.88304	50	4.88304	85	4.88304	30	4.88304	28
4.88609	66	4.88609	103	4.88609	27	4.88609	32
4.88914	77	4.88914	79	4.88914	26	4.88914	34
4.8922	65	4.8922	89	4.8922	26	4.8922	34
4.89525	72	4.89525	90	4.89525	34	4.89525	32
4.89831	57	4.89831	94	4.89831	30	4.89831	30
4.90136	70	4.90136	91	4.90136	16	4.90136	27
4.90441	77	4.90441	108	4.90441	26	4.90441	44
4.90747	74	4.90747	75	4.90747	28	4.90747	26
4.91052	75	4.91052	79	4.91052	36	4.91052	41
4.91358	61	4.91358	90	4.91358	42	4.91358	21
4.91663	58	4.91663	100	4.91663	24	4.91663	35
4.91968	66	4.91968	100	4.91968	34	4.91968	35
4.92274	58	4.92274	79	4.92274	30	4.92274	30
4.92579	66	4.92579	87	4.92579	26	4.92579	24
4.92884	61	4.92884	93	4.92884	24	4.92884	42
4.9319	73	4.9319	86	4.9319	19	4.9319	24
4.93495	77	4.93495	95	4.93495	19	4.93495	34
4.93801	62	4.93801	91	4.93801	22	4.93801	26
4.94106	55	4.94106	85	4.94106	26	4.94106	33
4.94411	67	4.94411	92	4.94411	23	4.94411	32
4.94717	60	4.94717	90	4.94717	16	4.94717	25
4.95022	67	4.95022	102	4.95022	30	4.95022	37
4.95327	62	4.95327	90	4.95327	25	4.95327	32
4.95633	75	4.95633	93	4.95633	25	4.95633	26
4.95938	59	4.95938	94	4.95938	29	4.95938	29
4.96244	52	4.96244	107	4.96244	26	4.96244	21
4.96549	55	4.96549	93	4.96549	28	4.96549	34
4.96854	56	4.96854	84	4.96854	31	4.96854	34
4.9716	58	4.9716	94	4.9716	18	4.9716	38
4.97465	74	4.97465	95	4.97465	32	4.97465	27
4.97771	59	4.97771	88	4.97771	34	4.97771	30
4.98076	73	4.98076	89	4.98076	29	4.98076	36
4.98381	83	4.98381	92	4.98381	22	4.98381	32
4.98687	62	4.98687	95	4.98687	32	4.98687	30
4.98992	56	4.98992	87	4.98992	18	4.98992	29
4.99297	72	4.99297	85	4.99297	21	4.99297	33
4.99603	65	4.99603	93	4.99603	31	4.99603	40
4.99908	53	4.99908	85	4.99908	26	4.99908	32
5.00214	60	5.00214	83	5.00214	19	5.00214	25
5.00519	63	5.00519	77	5.00519	25	5.00519	31
5.00824	53	5.00824	99	5.00824	28	5.00824	26
5.0113	71	5.0113	81	5.0113	18	5.0113	37
5.01435	67	5.01435	97	5.01435	14	5.01435	23
5.0174	62	5.0174	93	5.0174	28	5.0174	19
5.02046	55	5.02046	74	5.02046	29	5.02046	22
5.02351	70	5.02351	81	5.02351	21	5.02351	19
5.02657	53	5.02657	80	5.02657	22	5.02657	21
5.02962	53	5.02962	82	5.02962	33	5.02962	40
5.03267	60	5.03267	89	5.03267	19	5.03267	25
5.03573	44	5.03573	92	5.03573	31	5.03573	19
5.03878	45	5.03878	84	5.03878	28	5.03878	24
5.04184	59	5.04184	109	5.04184	26	5.04184	31
5.04489	70	5.04489	83	5.04489	19	5.04489	31
5.04794	67	5.04794	83	5.04794	18	5.04794	23
5.051	46	5.051	89	5.051	21	5.051	28
5.05405	43	5.05405	82	5.05405	29	5.05405	23
5.0571	68	5.0571	90	5.0571	16	5.0571	27
5.06016	57	5.06016	97	5.06016	23	5.06016	24
5.06321	59	5.06321	88	5.06321	33	5.06321	29
5.06627	68	5.06627	72	5.06627	24	5.06627	32
5.06932	56	5.06932	64	5.06932	19	5.06932	26
5.07237	66	5.07237	104	5.07237	28	5.07237	20
5.07543	53	5.07543	96	5.07543	34	5.07543	18
5.07848	59	5.07848	76	5.07848	16	5.07848	28
5.08153	43	5.08153	79	5.08153	27	5.08153	36
5.08459	62	5.08459	95	5.08459	27	5.08459	29
5.08764	58	5.08764	69	5.08764	20	5.08764	27
5.0907	67	5.0907	83	5.0907	31	5.0907	36
5.09375	58	5.09375	78	5.09375	34	5.09375	29
5.0968	58	5.0968	88	5.0968	31	5.0968	26
5.09986	68	5.09986	74	5.09986	18	5.09986	21
5.10291	51	5.10291	68	5.10291	19	5.10291	27
5.10597	61	5.10597	83	5.10597	25	5.10597	34
5.10902	70	5.10902	85	5.10902	19	5.10902	35
5.11207	67	5.11207	90	5.11207	31	5.11207	30
5.11513	55	5.11513	78	5.11513	31	5.11513	35
5.11818	52	5.11818	72	5.11818	18	5.11818	27
5.12123	52	5.12123	80	5.12123	20	5.12123	29
5.12429	60	5.12429	84	5.12429	28	5.12429	20
5.12734	81	5.12734	94	5.12734	19	5.12734	27
5.1304	46	5.1304	66	5.1304	15	5.1304	31
5.13345	61	5.13345	83	5.13345	27	5.13345	36
5.1365	64	5.1365	76	5.1365	22	5.1365	19
5.13956	55	5.13956	95	5.13956	18	5.13956	29
5.14261	67	5.14261	93	5.14261	28	5.14261	26
5.14566	74	5.14566	78	5.14566	19	5.14566	37
5.14872	59	5.14872	92	5.14872	20	5.14872	35
5.15177	62	5.15177	89	5.15177	17	5.15177	33
5.15483	52	5.15483	79	5.15483	26	5.15483	37
5.15788	63	5.15788	91	5.15788	31	5.15788	41
5.16093	55	5.16093	74	5.16093	27	5.16093	32
5.16399	66	5.16399	76	5.16399	23	5.16399	26
5.16704	40	5.16704	78	5.16704	17	5.16704	31
5.1701	55	5.1701	87	5.1701	24	5.1701	29
5.17315	54	5.17315	94	5.17315	21	5.17315	28
5.1762	76	5.1762	87	5.1762	31	5.1762	30
5.17926	59	5.17926	55	5.17926	14	5.17926	27
5.18231	66	5.18231	78	5.18231	16	5.18231	30
5.18536	56	5.18536	106	5.18536	17	5.18536	25
5.18842	45	5.18842	75	5.18842	17	5.18842	23
5.19147	59	5.19147	88	5.19147	18	5.19147	38
5.19453	57	5.19453	86	5.19453	30	5.19453	29
5.19758	56	5.19758	82	5.19758	36	5.19758	26
5.20063	66	5.20063	57	5.20063	26	5.20063	29
5.20369	50	5.20369	77	5.20369	19	5.20369	29
5.20674	64	5.20674	78	5.20674	33	5.20674	27
5.20979	57	5.20979	80	5.20979	27	5.20979	25
5.21285	51	5.21285	69	5.21285	22	5.21285	30
5.2159	56	5.2159	86	5.2159	24	5.2159	32
5.21896	63	5.21896	78	5.21896	33	5.21896	31
5.22201	72	5.22201	83	5.22201	21	5.22201	19
5.22506	48	5.22506	79	5.22506	16	5.22506	18
5.22812	53	5.22812	89	5.22812	24	5.22812	38
5.23117	57	5.23117	80	5.23117	21	5.23117	25
5.23423	60	5.23423	88	5.23423	19	5.23423	23
5.23728	61	5.23728	76	5.23728	36	5.23728	25
5.24033	63	5.24033	75	5.24033	25	5.24033	28
5.24339	61	5.24339	79	5.24339	22	5.24339	32
5.24644	63	5.24644	78	5.24644	21	5.24644	23
5.24949	61	5.24949	86	5.24949	28	5.24949	24
5.25255	46	5.25255	71	5.25255	21	5.25255	24
5.2556	57	5.2556	81	5.2556	21	5.2556	27
5.25866	50	5.25866	78	5.25866	30	5.25866	30
5.26171	61	5.26171	68	5.26171	11	5.26171	26
5.26476	63	5.26476	82	5.26476	30	5.26476	22
5.26782	58	5.26782	77	5.26782	26	5.26782	24
5.27087	51	5.27087	77	5.27087	22	5.27087	29
5.27392	50	5.27392	77	5.27392	16	5.27392	27
5.27698	72	5.27698	75	5.27698	24	5.27698	23
5.28003	54	5.28003	54	5.28003	19	5.28003	33
5.28309	55	5.28309	66	5.28309	25	5.28309	17
5.28614	57	5.28614	71	5.28614	27	5.28614	27
5.28919	58	5.28919	77	5.28919	24	5.28919	28
5.29225	46	5.29225	93	5.29225	24	5.29225	34
5.2953	57	5.2953	62	5.2953	24	5.2953	34
5.29836	55	5.29836	76	5.29836	18	5.29836	31
5.30141	45	5.30141	59	5.30141	28	5.30141	23
5.30446	64	5.30446	89	5.30446	15	5.30446	23
5.30752	62	5.30752	74	5.30752	36	5.30752	23
5.31057	54	5.31057	79	5.31057	18	5.31057	24
5.31362	57	5.31362	72	5.31362	25	5.31362	21
5.31668	54	5.31668	82	5.31668	12	5.31668	27
5.31973	57	5.31973	81	5.31973	25	5.31973	25
5.32279	39	5.32279	62	5.32279	30	5.32279	30
5.32584	57	5.32584	78	5.32584	16	5.32584	23
5.32889	43	5.32889	71	5.32889	17	5.32889	30
5.33195	50	5.33195	62	5.33195	19	5.33195	23
5.335	43	5.335	66	5.335	29	5.335	25
5.33805	46	5.33805	90	5.33805	13	5.33805	29
5.34111	66	5.34111	67	5.34111	21	5.34111	28
5.34416	60	5.34416	78	5.34416	21	5.34416	28
5.34722	43	5.34722	74	5.34722	20	5.34722	21
5.35027	53	5.35027	70	5.35027	15	5.35027	19
5.35332	51	5.35332	82	5.35332	21	5.35332	24
5.35638	60	5.35638	85	5.35638	21	5.35638	28
5.35943	48	5.35943	72	5.35943	28	5.35943	19
5.36249	53	5.36249	73	5.36249	20	5.36249	25
5.36554	46	5.36554	65	5.36554	18	5.36554	21
5.36859	44	5.36859	72	5.36859	25	5.36859	24
5.37165	56	5.37165	63	5.37165	17	5.37165	25
5.3747	59	5.3747	84	5.3747	17	5.3747	29
5.37775	49	5.37775	73	5.37775	23	5.37775	25
5.38081	52	5.38081	74	5.38081	24	5.38081	21
5.38386	56	5.38386	68	5.38386	22	5.38386	24
5.38692	45	5.38692	67	5.38692	24	5.38692	25
5.38997	59	5.38997	85	5.38997	14	5.38997	26
5.39302	49	5.39302	71	5.39302	14	5.39302	32
5.39608	55	5.39608	77	5.39608	29	5.39608	23
5.39913	54	5.39913	63	5.39913	34	5.39913	18
5.40218	42	5.40218	61	5.40218	24	5.40218	26
5.40524	59	5.40524	72	5.40524	23	5.40524	21
5.40829	57	5.40829	80	5.40829	24	5.40829	16
5.41135	49	5.41135	68	5.41135	26	5.41135	19
5.4144	55	5.4144	73	5.4144	23	5.4144	18
5.41745	46	5.41745	59	5.41745	24	5.41745	28
5.42051	55	5.42051	64	5.42051	17	5.42051	29
5.42356	64	5.42356	80	5.42356	24	5.42356	23
5.42661	58	5.42661	70	5.42661	19	5.42661	29
5.42967	44	5.42967	69	5.42967	21	5.42967	14
5.43272	50	5.43272	79	5.43272	27	5.43272	19
5.43578	47	5.43578	60	5.43578	24	5.43578	21
5.43883	44	5.43883	63	5.43883	16	5.43883	31
5.44188	52	5.44188	62	5.44188	17	5.44188	25
5.44494	59	5.44494	70	5.44494	25	5.44494	33
5.44799	46	5.44799	58	5.44799	19	5.44799	20
5.45105	42	5.45105	87	5.45105	27	5.45105	29
5.4541	45	5.4541	86	5.4541	17	5.4541	19
5.45715	52	5.45715	73	5.45715	26	5.45715	26
5.46021	51	5.46021	79	5.46021	20	5.46021	19
5.46326	50	5.46326	52	5.46326	26	5.46326	25
5.46631	51	5.46631	63	5.46631	20	5.46631	21
5.46937	47	5.46937	64	5.46937	22	5.46937	18
5.47242	60	5.47242	76	5.47242	17	5.47242	27
5.47548	52	5.47548	94	5.47548	25	5.47548	25
5.47853	51	5.47853	64	5.47853	22	5.47853	15
5.48158	33	5.48158	65	5.48158	19	5.48158	27
5.48464	58	5.48464	81	5.48464	14	5.48464	27
5.48769	51	5.48769	78	5.48769	22	5.48769	28
5.49074	55	5.49074	85	5.49074	25	5.49074	19
5.4938	59	5.4938	87	5.4938	18	5.4938	21
5.49685	45	5.49685	66	5.49685	24	5.49685	27
5.49991	64	5.49991	81	5.49991	20	5.49991	20
5.50296	48	5.50296	77	5.50296	22	5.50296	21
5.50601	49	5.50601	67	5.50601	15	5.50601	31
5.50907	46	5.50907	70	5.50907	23	5.50907	24
5.51212	42	5.51212	62	5.51212	14	5.51212	22
5.51518	51	5.51518	75	5.51518	22	5.51518	31
5.51823	42	5.51823	58	5.51823	14	5.51823	33
5.52128	62	5.52128	77	5.52128	21	5.52128	22
5.52434	40	5.52434	76	5.52434	28	5.52434	27
5.52739	45	5.52739	71	5.52739	22	5.52739	28
5.53044	43	5.53044	67	5.53044	22	5.53044	25
5.5335	43	5.5335	78	5.5335	24	5.5335	20
5.53655	38	5.53655	61	5.53655	21	5.53655	19
5.53961	45	5.53961	59	5.53961	22	5.53961	26
5.54266	42	5.54266	69	5.54266	22	5.54266	21
5.54571	42	5.54571	66	5.54571	16	5.54571	27
5.54877	47	5.54877	78	5.54877	25	5.54877	32
5.55182	50	5.55182	78	5.55182	18	5.55182	27
5.55487	49	5.55487	72	5.55487	19	5.55487	25
5.55793	45	5.55793	74	5.55793	16	5.55793	34
5.56098	49	5.56098	80	5.56098	15	5.56098	26
5.56404	54	5.56404	75	5.56404	21	5.56404	26
5.56709	48	5.56709	63	5.56709	20	5.56709	32
5.57014	33	5.57014	80	5.57014	20	5.57014	30
5.5732	48	5.5732	88	5.5732	19	5.5732	28
5.57625	55	5.57625	69	5.57625	21	5.57625	24
5.57931	45	5.57931	73	5.57931	32	5.57931	26
5.58236	47	5.58236	72	5.58236	21	5.58236	26
5.58541	52	5.58541	66	5.58541	19	5.58541	17
5.58847	56	5.58847	56	5.58847	19	5.58847	20
5.59152	41	5.59152	80	5.59152	22	5.59152	28
5.59457	49	5.59457	73	5.59457	20	5.59457	22
5.59763	50	5.59763	49	5.59763	25	5.59763	26
5.60068	45	5.60068	62	5.60068	26	5.60068	16
5.60374	42	5.60374	62	5.60374	22	5.60374	23
5.60679	47	5.60679	62	5.60679	21	5.60679	18
5.60984	54	5.60984	55	5.60984	16	5.60984	23
5.6129	38	5.6129	63	5.6129	23	5.6129	24
5.61595	49	5.61595	75	5.61595	23	5.61595	20
5.619	47	5.619	55	5.619	19	5.619	16
5.62206	55	5.62206	66	5.62206	25	5.62206	25
5.62511	60	5.62511	45	5.62511	12	5.62511	21
5.62817	52	5.62817	70	5.62817	21	5.62817	25
5.63122	50	5.63122	78	5.63122	11	5.63122	16
5.63427	36	5.63427	61	5.63427	14	5.63427	22
5.63733	37	5.63733	65	5.63733	14	5.63733	35
5.64038	52	5.64038	65	5.64038	25	5.64038	24
5.64344	44	5.64344	67	5.64344	23	5.64344	29
5.64649	42	5.64649	53	5.64649	16	5.64649	20
5.64954	42	5.64954	65	5.64954	27	5.64954	24
5.6526	45	5.6526	56	5.6526	18	5.6526	24
5.65565	42	5.65565	54	5.65565	22	5.65565	21
5.6587	54	5.6587	72	5.6587	13	5.6587	34
5.66176	38	5.66176	67	5.66176	24	5.66176	29
5.66481	51	5.66481	77	5.66481	22	5.66481	14
5.66787	38	5.66787	62	5.66787	25	5.66787	21
5.67092	45	5.67092	70	5.67092	16	5.67092	21
5.67397	39	5.67397	56	5.67397	21	5.67397	21
5.67703	30	5.67703	68	5.67703	21	5.67703	17
5.68008	45	5.68008	68	5.68008	24	5.68008	27
5.68313	51	5.68313	57	5.68313	19	5.68313	17
5.68619	51	5.68619	61	5.68619	19	5.68619	25
5.68924	38	5.68924	62	5.68924	21	5.68924	19
5.6923	38	5.6923	60	5.6923	7	5.6923	22
5.69535	55	5.69535	65	5.69535	26	5.69535	24
5.6984	45	5.6984	53	5.6984	11	5.6984	27
5.70146	37	5.70146	52	5.70146	15	5.70146	25
5.70451	49	5.70451	65	5.70451	21	5.70451	19
5.70757	40	5.70757	65	5.70757	23	5.70757	20
5.71062	62	5.71062	65	5.71062	18	5.71062	25
5.71367	49	5.71367	56	5.71367	16	5.71367	25
5.71673	52	5.71673	69	5.71673	22	5.71673	19
5.71978	45	5.71978	70	5.71978	25	5.71978	22
5.72283	38	5.72283	64	5.72283	17	5.72283	24
5.72589	57	5.72589	48	5.72589	16	5.72589	21
5.72894	46	5.72894	62	5.72894	17	5.72894	34
5.732	33	5.732	65	5.732	31	5.732	25
5.73505	35	5.73505	57	5.73505	20	5.73505	27
5.7381	39	5.7381	62	5.7381	15	5.7381	21
5.74116	34	5.74116	57	5.74116	19	5.74116	18
5.74421	44	5.74421	51	5.74421	26	5.74421	22
5.74726	40	5.74726	52	5.74726	15	5.74726	20
5.75032	38	5.75032	71	5.75032	23	5.75032	23
5.75337	40	5.75337	63	5.75337	26	5.75337	22
5.75643	38	5.75643	53	5.75643	11	5.75643	19
5.75948	41	5.75948	75	5.75948	20	5.75948	20
5.76253	45	5.76253	72	5.76253	17	5.76253	32
5.76559	38	5.76559	66	5.76559	20	5.76559	16
5.76864	40	5.76864	57	5.76864	27	5.76864	20
5.7717	42	5.7717	64	5.7717	17	5.7717	22
5.77475	34	5.77475	61	5.77475	22	5.77475	22
5.7778	43	5.7778	65	5.7778	22	5.7778	28
5.78086	45	5.78086	56	5.78086	16	5.78086	17
5.78391	46	5.78391	52	5.78391	21	5.78391	27
5.78696	53	5.78696	59	5.78696	15	5.78696	27
5.79002	42	5.79002	64	5.79002	17	5.79002	14
5.79307	55	5.79307	56	5.79307	18	5.79307	16
5.79613	40	5.79613	62	5.79613	18	5.79613	19
5.79918	47	5.79918	76	5.79918	22	5.79918	13
5.80223	29	5.80223	57	5.80223	16	5.80223	20
5.80529	47	5.80529	52	5.80529	22	5.80529	20
5.80834	52	5.80834	66	5.80834	17	5.80834	23
5.81139	41	5.81139	51	5.81139	17	5.81139	17
5.81445	48	5.81445	44	5.81445	17	5.81445	18
5.8175	52	5.8175	55	5.8175	13	5.8175	16
5.82056	48	5.82056	55	5.82056	20	5.82056	12
5.82361	37	5.82361	61	5.82361	12	5.82361	22
5.82666	42	5.82666	63	5.82666	23	5.82666	16
5.82972	43	5.82972	73	5.82972	23	5.82972	20
5.83277	44	5.83277	55	5.83277	12	5.83277	29
5.83583	35	5.83583	63	5.83583	21	5.83583	26
5.83888	39	5.83888	69	5.83888	25	5.83888	26
5.84193	48	5.84193	71	5.84193	14	5.84193	30
5.84499	40	5.84499	55	5.84499	22	5.84499	22
5.84804	39	5.84804	50	5.84804	13	5.84804	21
5.85109	31	5.85109	55	5.85109	11	5.85109	24
5.85415	33	5.85415	58	5.85415	18	5.85415	16
5.8572	45	5.8572	50	5.8572	21	5.8572	21
5.86026	46	5.86026	59	5.86026	20	5.86026	22
5.86331	43	5.86331	56	5.86331	15	5.86331	17
5.86636	38	5.86636	58	5.86636	19	5.86636	25
5.86942	39	5.86942	60	5.86942	15	5.86942	18
5.87247	41	5.87247	53	5.87247	22	5.87247	22
5.87552	44	5.87552	56	5.87552	24	5.87552	22
5.87858	36	5.87858	51	5.87858	12	5.87858	24
5.88163	29	5.88163	64	5.88163	17	5.88163	23
5.88469	43	5.88469	63	5.88469	20	5.88469	19
5.88774	45	5.88774	52	5.88774	16	5.88774	16
5.89079	46	5.89079	54	5.89079	21	5.89079	19
5.89385	36	5.89385	61	5.89385	16	5.89385	17
5.8969	45	5.8969	57	5.8969	19	5.8969	24
5.89996	31	5.89996	54	5.89996	20	5.89996	16
5.90301	34	5.90301	58	5.90301	17	5.90301	18
5.90606	38	5.90606	66	5.90606	14	5.90606	21
5.90912	38	5.90912	59	5.90912	11	5.90912	15
5.91217	37	5.91217	54	5.91217	20	5.91217	20
5.91522	38	5.91522	55	5.91522	23	5.91522	20
5.91828	50	5.91828	60	5.91828	18	5.91828	23
5.92133	33	5.92133	63	5.92133	22	5.92133	23
5.92439	30	5.92439	52	5.92439	19	5.92439	29
5.92744	42	5.92744	46	5.92744	21	5.92744	19
5.93049	46	5.93049	53	5.93049	25	5.93049	19
5.93355	39	5.93355	57	5.93355	14	5.93355	26
5.9366	42	5.9366	65	5.9366	20	5.9366	25
5.93965	45	5.93965	54	5.93965	17	5.93965	19
5.94271	44	5.94271	63	5.94271	11	5.94271	20
5.94576	38	5.94576	57	5.94576	18	5.94576	20
5.94882	39	5.94882	67	5.94882	13	5.94882	22
5.95187	40	5.95187	50	5.95187	17	5.95187	15
5.95492	45	5.95492	62	5.95492	9	5.95492	17
5.95798	32	5.95798	54	5.95798	21	5.95798	20
5.96103	49	5.96103	52	5.96103	19	5.96103	28
5.96408	46	5.96408	56	5.96408	14	5.96408	17
5.96714	44	5.96714	64	5.96714	14	5.96714	23
5.97019	30	5.97019	55	5.97019	19	5.97019	22
5.97325	30	5.97325	46	5.97325	11	5.97325	20
5.9763	36	5.9763	70	5.9763	14	5.9763	19
5.97935	39	5.97935	57	5.97935	13	5.97935	17
5.98241	44	5.98241	53	5.98241	14	5.98241	16
5.98546	37	5.98546	54	5.98546	20	5.98546	19
5.98852	32	5.98852	66	5.98852	16	5.98852	25
5.99157	33	5.99157	74	5.99157	13	5.99157	14
5.99462	45	5.99462	57	5.99462	15	5.99462	30
5.99768	47	5.99768	41	5.99768	13	5.99768	22
6.00073	35	6.00073	53	6.00073	24	6.00073	18
6.00378	32	6.00378	57	6.00378	23	6.00378	20
6.00684	34	6.00684	59	6.00684	17	6.00684	19
6.00989	30	6.00989	51	6.00989	10	6.00989	20
6.01295	44	6.01295	65	6.01295	15	6.01295	19
6.016	47	6.016	55	6.016	9	6.016	20
6.01905	34	6.01905	57	6.01905	19	6.01905	23
6.02211	41	6.02211	62	6.02211	16	6.02211	22
6.02516	24	6.02516	61	6.02516	12	6.02516	19
6.02821	41	6.02821	53	6.02821	18	6.02821	31
6.03127	31	6.03127	57	6.03127	16	6.03127	21
6.03432	32	6.03432	55	6.03432	18	6.03432	19
6.03738	35	6.03738	49	6.03738	21	6.03738	23
6.04043	40	6.04043	69	6.04043	22	6.04043	21
6.04348	45	6.04348	71	6.04348	12	6.04348	14
6.04654	30	6.04654	54	6.04654	30	6.04654	21
6.04959	38	6.04959	37	6.04959	17	6.04959	23
6.05265	34	6.05265	58	6.05265	22	6.05265	20
6.0557	33	6.0557	57	6.0557	18	6.0557	20
6.05875	38	6.05875	72	6.05875	24	6.05875	16
6.06181	34	6.06181	55	6.06181	16	6.06181	15
6.06486	48	6.06486	42	6.06486	14	6.06486	14
6.06791	44	6.06791	64	6.06791	21	6.06791	22
6.07097	45	6.07097	47	6.07097	15	6.07097	20
6.07402	40	6.07402	65	6.07402	22	6.07402	19
6.07708	35	6.07708	47	6.07708	18	6.07708	17
6.08013	33	6.08013	55	6.08013	22	6.08013	16
6.08318	41	6.08318	54	6.08318	14	6.08318	16
6.08624	31	6.08624	46	6.08624	15	6.08624	19
6.08929	36	6.08929	55	6.08929	17	6.08929	15
6.09234	32	6.09234	40	6.09234	24	6.09234	20
6.0954	42	6.0954	52	6.0954	14	6.0954	21
6.09845	42	6.09845	52	6.09845	15	6.09845	19
6.10151	41	6.10151	52	6.10151	11	6.10151	15
[truncated: 2,097 more rows]

## Sheet: npq1 LL
DARK		DARK		60' LIGHT		60' LIGHT
0	0	0	0	0	0	0	0
0.00305	0	0.00305	0	0.00305	0	0.00305	0
0.00611	0	0.00611	0	0.00611	0	0.00611	0
0.00916	0	0.00916	0	0.00916	0	0.00916	0
0.01222	0	0.01222	0	0.01222	0	0.01222	0
0.01527	0	0.01527	0	0.01527	0	0.01527	0
0.01832	0	0.01832	0	0.01832	0	0.01832	0
0.02138	0	0.02138	0	0.02138	0	0.02138	0
0.02443	0	0.02443	0	0.02443	0	0.02443	0
0.02748	0	0.02748	0	0.02748	0	0.02748	0
0.03054	0	0.03054	0	0.03054	0	0.03054	0
0.03359	0	0.03359	0	0.03359	0	0.03359	0
0.03665	0	0.03665	0	0.03665	0	0.03665	0
0.0397	0	0.0397	0	0.0397	0	0.0397	0
0.04275	0	0.04275	0	0.04275	0	0.04275	0
0.04581	0	0.04581	0	0.04581	0	0.04581	0
0.04886	0	0.04886	0	0.04886	0	0.04886	0
0.05191	0	0.05191	0	0.05191	0	0.05191	0
0.05497	0	0.05497	0	0.05497	0	0.05497	0
0.05802	0	0.05802	0	0.05802	0	0.05802	0
0.06108	0	0.06108	0	0.06108	0	0.06108	0
0.06413	0	0.06413	0	0.06413	0	0.06413	0
0.06718	0	0.06718	0	0.06718	0	0.06718	0
0.07024	0	0.07024	0	0.07024	0	0.07024	0
0.07329	0	0.07329	0	0.07329	0	0.07329	0
0.07635	0	0.07635	0	0.07635	0	0.07635	0
0.0794	0	0.0794	0	0.0794	0	0.0794	0
0.08245	0	0.08245	0	0.08245	0	0.08245	0
0.08551	0	0.08551	0	0.08551	0	0.08551	0
0.08856	0	0.08856	0	0.08856	0	0.08856	0
0.09161	0	0.09161	0	0.09161	0	0.09161	0
0.09467	0	0.09467	0	0.09467	0	0.09467	0
0.09772	0	0.09772	0	0.09772	0	0.09772	0
0.10078	0	0.10078	0	0.10078	0	0.10078	0
0.10383	0	0.10383	0	0.10383	0	0.10383	0
0.10688	0	0.10688	0	0.10688	0	0.10688	0
0.10994	0	0.10994	0	0.10994	0	0.10994	0
0.11299	0	0.11299	0	0.11299	0	0.11299	0
0.11604	0	0.11604	0	0.11604	0	0.11604	0
0.1191	0	0.1191	0	0.1191	0	0.1191	0
0.12215	0	0.12215	0	0.12215	0	0.12215	0
0.12521	0	0.12521	0	0.12521	0	0.12521	0
0.12826	0	0.12826	0	0.12826	0	0.12826	0
0.13131	0	0.13131	0	0.13131	0	0.13131	0
0.13437	0	0.13437	0	0.13437	0	0.13437	0
0.13742	0	0.13742	0	0.13742	0	0.13742	0
0.14048	0	0.14048	0	0.14048	0	0.14048	0
0.14353	0	0.14353	0	0.14353	0	0.14353	0
0.14658	0	0.14658	0	0.14658	0	0.14658	0
0.14964	0	0.14964	0	0.14964	0	0.14964	0
0.15269	0	0.15269	0	0.15269	0	0.15269	0
0.15574	0	0.15574	0	0.15574	0	0.15574	0
0.1588	0	0.1588	0	0.1588	0	0.1588	0
0.16185	0	0.16185	0	0.16185	0	0.16185	0
0.16491	0	0.16491	0	0.16491	0	0.16491	0
0.16796	0	0.16796	0	0.16796	0	0.16796	0
0.17101	0	0.17101	0	0.17101	0	0.17101	0
0.17407	0	0.17407	0	0.17407	0	0.17407	0
0.17712	0	0.17712	0	0.17712	0	0.17712	0
0.18017	0	0.18017	0	0.18017	0	0.18017	0
0.18323	0	0.18323	0	0.18323	0	0.18323	0
0.18628	0	0.18628	0	0.18628	0	0.18628	0
0.18934	0	0.18934	0	0.18934	0	0.18934	0
0.19239	0	0.19239	0	0.19239	0	0.19239	0
0.19544	0	0.19544	0	0.19544	0	0.19544	0
0.1985	0	0.1985	0	0.1985	0	0.1985	0
0.20155	0	0.20155	0	0.20155	0	0.20155	0
0.20461	0	0.20461	0	0.20461	0	0.20461	0
0.20766	0	0.20766	0	0.20766	0	0.20766	0
0.21071	0	0.21071	0	0.21071	0	0.21071	0
0.21377	0	0.21377	0	0.21377	0	0.21377	0
0.21682	0	0.21682	0	0.21682	0	0.21682	0
0.21987	0	0.21987	0	0.21987	0	0.21987	0
0.22293	0	0.22293	0	0.22293	0	0.22293	0
0.22598	0	0.22598	0	0.22598	0	0.22598	0
0.22904	0	0.22904	0	0.22904	0	0.22904	0
0.23209	0	0.23209	0	0.23209	0	0.23209	0
0.23514	0	0.23514	0	0.23514	0	0.23514	0
0.2382	0	0.2382	0	0.2382	0	0.2382	0
0.24125	0	0.24125	0	0.24125	0	0.24125	0
0.2443	0	0.2443	0	0.2443	0	0.2443	0
0.24736	0	0.24736	0	0.24736	0	0.24736	0
0.25041	0	0.25041	0	0.25041	0	0.25041	0
0.25347	0	0.25347	0	0.25347	0	0.25347	0
0.25652	0	0.25652	0	0.25652	0	0.25652	0
0.25957	0	0.25957	0	0.25957	0	0.25957	0
0.26263	0	0.26263	0	0.26263	0	0.26263	0
0.26568	0	0.26568	0	0.26568	0	0.26568	0
0.26874	0	0.26874	0	0.26874	0	0.26874	0
0.27179	0	0.27179	0	0.27179	0	0.27179	0
0.27484	0	0.27484	0	0.27484	0	0.27484	0
0.2779	0	0.2779	0	0.2779	0	0.2779	0
0.28095	0	0.28095	0	0.28095	0	0.28095	0
0.284	0	0.284	0	0.284	0	0.284	0
0.28706	0	0.28706	0	0.28706	0	0.28706	0
0.29011	0	0.29011	0	0.29011	0	0.29011	0
0.29317	0	0.29317	0	0.29317	0	0.29317	0
0.29622	0	0.29622	0	0.29622	0	0.29622	0
0.29927	0	0.29927	0	0.29927	0	0.29927	0
0.30233	0	0.30233	0	0.30233	0	0.30233	0
0.30538	0	0.30538	0	0.30538	0	0.30538	0
0.30843	0	0.30843	0	0.30843	0	0.30843	0
0.31149	0	0.31149	0	0.31149	0	0.31149	0
0.31454	0	0.31454	0	0.31454	0	0.31454	0
0.3176	0	0.3176	0	0.3176	0	0.3176	0
0.32065	0	0.32065	0	0.32065	0	0.32065	0
0.3237	0	0.3237	0	0.3237	0	0.3237	0
0.32676	0	0.32676	0	0.32676	0	0.32676	0
0.32981	0	0.32981	0	0.32981	0	0.32981	0
0.33286	0	0.33286	0	0.33286	0	0.33286	0
0.33592	0	0.33592	0	0.33592	0	0.33592	0
0.33897	0	0.33897	0	0.33897	0	0.33897	0
0.34203	0	0.34203	0	0.34203	0	0.34203	0
0.34508	0	0.34508	0	0.34508	0	0.34508	0
0.34813	0	0.34813	0	0.34813	0	0.34813	0
0.35119	0	0.35119	0	0.35119	0	0.35119	0
0.35424	0	0.35424	0	0.35424	0	0.35424	0
0.3573	0	0.3573	0	0.3573	0	0.3573	0
0.36035	0	0.36035	0	0.36035	0	0.36035	0
0.3634	0	0.3634	0	0.3634	0	0.3634	0
0.36646	0	0.36646	0	0.36646	0	0.36646	0
0.36951	0	0.36951	0	0.36951	0	0.36951	0
0.37256	0	0.37256	0	0.37256	0	0.37256	0
0.37562	0	0.37562	0	0.37562	0	0.37562	0
0.37867	0	0.37867	0	0.37867	0	0.37867	0
0.38173	0	0.38173	0	0.38173	0	0.38173	0
0.38478	0	0.38478	0	0.38478	0	0.38478	0
0.38783	0	0.38783	0	0.38783	0	0.38783	0
0.39089	0	0.39089	0	0.39089	0	0.39089	0
0.39394	0	0.39394	0	0.39394	0	0.39394	0
0.39699	0	0.39699	0	0.39699	0	0.39699	0
0.40005	0	0.40005	0	0.40005	0	0.40005	0
0.4031	0	0.4031	0	0.4031	0	0.4031	0
0.40616	0	0.40616	0	0.40616	0	0.40616	0
0.40921	0	0.40921	0	0.40921	0	0.40921	0
0.41226	0	0.41226	0	0.41226	0	0.41226	0
0.41532	0	0.41532	0	0.41532	0	0.41532	0
0.41837	0	0.41837	0	0.41837	0	0.41837	0
0.42143	0	0.42143	0	0.42143	0	0.42143	0
0.42448	0	0.42448	0	0.42448	0	0.42448	0
0.42753	0	0.42753	0	0.42753	0	0.42753	0
0.43059	0	0.43059	0	0.43059	0	0.43059	0
0.43364	0	0.43364	0	0.43364	0	0.43364	0
0.43669	0	0.43669	0	0.43669	0	0.43669	0
0.43975	0	0.43975	0	0.43975	0	0.43975	0
0.4428	0	0.4428	0	0.4428	0	0.4428	0
0.44586	0	0.44586	0	0.44586	0	0.44586	0
0.44891	0	0.44891	0	0.44891	0	0.44891	0
0.45196	0	0.45196	0	0.45196	0	0.45196	0
0.45502	0	0.45502	0	0.45502	0	0.45502	0
0.45807	0	0.45807	0	0.45807	0	0.45807	0
0.46112	0	0.46112	0	0.46112	0	0.46112	0
0.46418	0	0.46418	0	0.46418	0	0.46418	0
0.46723	0	0.46723	0	0.46723	0	0.46723	0
0.47029	0	0.47029	0	0.47029	0	0.47029	0
0.47334	0	0.47334	0	0.47334	0	0.47334	0
0.47639	0	0.47639	0	0.47639	0	0.47639	0
0.47945	0	0.47945	0	0.47945	0	0.47945	0
0.4825	0	0.4825	0	0.4825	0	0.4825	0
0.48556	0	0.48556	0	0.48556	0	0.48556	0
0.48861	0	0.48861	0	0.48861	0	0.48861	0
0.49166	0	0.49166	0	0.49166	0	0.49166	0
0.49472	0	0.49472	0	0.49472	0	0.49472	0
0.49777	0	0.49777	0	0.49777	0	0.49777	0
0.50082	0	0.50082	0	0.50082	0	0.50082	0
0.50388	0	0.50388	0	0.50388	0	0.50388	0
0.50693	0	0.50693	0	0.50693	0	0.50693	0
0.50999	0	0.50999	0	0.50999	0	0.50999	0
0.51304	0	0.51304	0	0.51304	0	0.51304	0
0.51609	0	0.51609	0	0.51609	0	0.51609	0
0.51915	0	0.51915	0	0.51915	0	0.51915	0
0.5222	0	0.5222	0	0.5222	0	0.5222	0
0.52525	0	0.52525	0	0.52525	0	0.52525	0
0.52831	0	0.52831	0	0.52831	0	0.52831	0
0.53136	0	0.53136	0	0.53136	0	0.53136	0
0.53442	0	0.53442	0	0.53442	0	0.53442	0
0.53747	0	0.53747	0	0.53747	0	0.53747	0
0.54052	0	0.54052	0	0.54052	0	0.54052	0
0.54358	0	0.54358	0	0.54358	0	0.54358	0
0.54663	0	0.54663	0	0.54663	0	0.54663	0
0.54969	0	0.54969	0	0.54969	0	0.54969	0
0.55274	0	0.55274	0	0.55274	0	0.55274	0
0.55579	0	0.55579	0	0.55579	0	0.55579	0
0.55885	0	0.55885	0	0.55885	0	0.55885	0
0.5619	0	0.5619	0	0.5619	0	0.5619	0
0.56495	0	0.56495	0	0.56495	0	0.56495	0
0.56801	0	0.56801	0	0.56801	0	0.56801	0
0.57106	0	0.57106	0	0.57106	0	0.57106	0
0.57412	0	0.57412	0	0.57412	0	0.57412	0
0.57717	0	0.57717	0	0.57717	0	0.57717	0
0.58022	0	0.58022	0	0.58022	0	0.58022	0
0.58328	0	0.58328	0	0.58328	0	0.58328	0
0.58633	0	0.58633	0	0.58633	0	0.58633	0
0.58938	0	0.58938	0	0.58938	0	0.58938	0
0.59244	0	0.59244	0	0.59244	0	0.59244	0
0.59549	0	0.59549	0	0.59549	0	0.59549	0
0.59855	0	0.59855	0	0.59855	0	0.59855	0
0.6016	0	0.6016	0	0.6016	0	0.6016	0
0.60465	0	0.60465	0	0.60465	0	0.60465	0
0.60771	0	0.60771	0	0.60771	0	0.60771	0
0.61076	0	0.61076	0	0.61076	0	0.61076	0
0.61382	0	0.61382	0	0.61382	0	0.61382	0
0.61687	0	0.61687	0	0.61687	0	0.61687	0
0.61992	0	0.61992	0	0.61992	0	0.61992	0
0.62298	0	0.62298	0	0.62298	0	0.62298	0
0.62603	0	0.62603	0	0.62603	0	0.62603	0
0.62908	0	0.62908	0	0.62908	0	0.62908	0
0.63214	0	0.63214	0	0.63214	0	0.63214	0
0.63519	3	0.63519	4	0.63519	7	0.63519	6
0.63825	1	0.63825	4	0.63825	6	0.63825	9
0.6413	2	0.6413	9	0.6413	8	0.6413	5
0.64435	7	0.64435	12	0.64435	2	0.64435	5
0.64741	5	0.64741	10	0.64741	9	0.64741	8
0.65046	6	0.65046	8	0.65046	4	0.65046	13
0.65351	8	0.65351	8	0.65351	12	0.65351	7
0.65657	5	0.65657	7	0.65657	11	0.65657	8
0.65962	6	0.65962	8	0.65962	9	0.65962	4
0.66268	3	0.66268	4	0.66268	8	0.66268	9
0.66573	5	0.66573	10	0.66573	11	0.66573	5
0.66878	3	0.66878	11	0.66878	11	0.66878	8
0.67184	2	0.67184	5	0.67184	4	0.67184	4
0.67489	9	0.67489	11	0.67489	12	0.67489	6
0.67795	3	0.67795	14	0.67795	6	0.67795	8
0.681	7	0.681	7	0.681	7	0.681	6
0.68405	5	0.68405	8	0.68405	8	0.68405	5
0.68711	5	0.68711	7	0.68711	6	0.68711	5
0.69016	7	0.69016	8	0.69016	7	0.69016	6
0.69321	6	0.69321	9	0.69321	7	0.69321	4
0.69627	6	0.69627	7	0.69627	14	0.69627	5
0.69932	4	0.69932	3	0.69932	5	0.69932	10
0.70238	6	0.70238	8	0.70238	12	0.70238	6
0.70543	4	0.70543	8	0.70543	5	0.70543	6
0.70848	13	0.70848	12	0.70848	8	0.70848	3
0.71154	9	0.71154	11	0.71154	2	0.71154	10
0.71459	10	0.71459	6	0.71459	10	0.71459	7
0.71764	8	0.71764	8	0.71764	14	0.71764	5
0.7207	4	0.7207	8	0.7207	9	0.7207	4
0.72375	5	0.72375	10	0.72375	8	0.72375	6
0.72681	10	0.72681	12	0.72681	11	0.72681	8
0.72986	7	0.72986	10	0.72986	6	0.72986	2
0.73291	11	0.73291	9	0.73291	9	0.73291	11
0.73597	4	0.73597	14	0.73597	9	0.73597	7
0.73902	6	0.73902	11	0.73902	9	0.73902	6
0.74208	8	0.74208	8	0.74208	6	0.74208	5
0.74513	5	0.74513	10	0.74513	7	0.74513	5
0.74818	1	0.74818	14	0.74818	7	0.74818	3
0.75124	6	0.75124	5	0.75124	10	0.75124	6
0.75429	7	0.75429	2	0.75429	2	0.75429	5
0.75734	10	0.75734	18	0.75734	4	0.75734	4
0.7604	8	0.7604	7	0.7604	11	0.7604	5
0.76345	9	0.76345	12	0.76345	15	0.76345	8
0.76651	11	0.76651	4	0.76651	7	0.76651	3
0.76956	5	0.76956	5	0.76956	10	0.76956	12
0.77261	3	0.77261	6	0.77261	13	0.77261	9
0.77567	7	0.77567	8	0.77567	7	0.77567	5
0.77872	5	0.77872	10	0.77872	7	0.77872	5
0.78177	7	0.78177	9	0.78177	10	0.78177	7
0.78483	7	0.78483	9	0.78483	9	0.78483	4
0.78788	6	0.78788	8	0.78788	6	0.78788	6
0.79094	4	0.79094	14	0.79094	9	0.79094	6
0.79399	5	0.79399	10	0.79399	4	0.79399	5
0.79704	5	0.79704	9	0.79704	7	0.79704	7
0.8001	7	0.8001	6	0.8001	11	0.8001	3
0.80315	7	0.80315	5	0.80315	8	0.80315	11
0.80621	8	0.80621	11	0.80621	6	0.80621	7
0.80926	8	0.80926	14	0.80926	13	0.80926	3
0.81231	12	0.81231	6	0.81231	8	0.81231	14
0.81537	5	0.81537	7	0.81537	9	0.81537	6
0.81842	10	0.81842	17	0.81842	10	0.81842	5
0.82147	5	0.82147	16	0.82147	12	0.82147	6
0.82453	8	0.82453	14	0.82453	9	0.82453	9
0.82758	4	0.82758	7	0.82758	13	0.82758	9
0.83064	8	0.83064	7	0.83064	9	0.83064	11
0.83369	4	0.83369	12	0.83369	9	0.83369	8
0.83674	11	0.83674	15	0.83674	11	0.83674	9
0.8398	5	0.8398	13	0.8398	15	0.8398	6
0.84285	11	0.84285	12	0.84285	9	0.84285	6
0.8459	15	0.8459	20	0.8459	9	0.8459	10
0.84896	9	0.84896	16	0.84896	10	0.84896	1
0.85201	11	0.85201	16	0.85201	12	0.85201	8
0.85507	9	0.85507	15	0.85507	15	0.85507	9
0.85812	9	0.85812	16	0.85812	11	0.85812	9
0.86117	14	0.86117	12	0.86117	7	0.86117	6
0.86423	11	0.86423	20	0.86423	18	0.86423	6
0.86728	9	0.86728	25	0.86728	14	0.86728	4
0.87033	12	0.87033	18	0.87033	19	0.87033	11
0.87339	9	0.87339	12	0.87339	16	0.87339	9
0.87644	19	0.87644	12	0.87644	13	0.87644	16
0.8795	18	0.8795	20	0.8795	13	0.8795	17
0.88255	15	0.88255	28	0.88255	10	0.88255	14
0.8856	16	0.8856	31	0.8856	19	0.8856	20
0.88866	16	0.88866	30	0.88866	23	0.88866	17
0.89171	25	0.89171	45	0.89171	21	0.89171	18
0.89477	17	0.89477	48	0.89477	24	0.89477	28
0.89782	25	0.89782	48	0.89782	27	0.89782	29
0.90087	28	0.90087	41	0.90087	27	0.90087	34
0.90393	26	0.90393	52	0.90393	32	0.90393	33
0.90698	36	0.90698	79	0.90698	42	0.90698	35
0.91003	34	0.91003	72	0.91003	32	0.91003	52
0.91309	33	0.91309	73	0.91309	43	0.91309	41
0.91614	41	0.91614	93	0.91614	56	0.91614	60
0.9192	55	0.9192	106	0.9192	38	0.9192	66
0.92225	53	0.92225	116	0.92225	58	0.92225	74
0.9253	42	0.9253	128	0.9253	66	0.9253	72
0.92836	60	0.92836	128	0.92836	73	0.92836	72
0.93141	70	0.93141	170	0.93141	68	0.93141	92
0.93446	71	0.93446	156	0.93446	74	0.93446	97
0.93752	94	0.93752	160	0.93752	67	0.93752	96
0.94057	84	0.94057	189	0.94057	89	0.94057	105
0.94363	108	0.94363	232	0.94363	93	0.94363	113
0.94668	102	0.94668	245	0.94668	118	0.94668	157
0.94973	105	0.94973	276	0.94973	125	0.94973	135
0.95279	134	0.95279	297	0.95279	145	0.95279	166
0.95584	136	0.95584	299	0.95584	140	0.95584	157
0.9589	154	0.9589	311	0.9589	148	0.9589	152
0.96195	172	0.96195	369	0.96195	166	0.96195	183
0.965	162	0.965	398	0.965	154	0.965	212
0.96806	166	0.96806	381	0.96806	196	0.96806	215
0.97111	196	0.97111	405	0.97111	205	0.97111	219
0.97416	198	0.97416	443	0.97416	201	0.97416	267
0.97722	235	0.97722	468	0.97722	237	0.97722	272
0.98027	238	0.98027	539	0.98027	259	0.98027	273
0.98333	250	0.98333	466	0.98333	258	0.98333	289
0.98638	231	0.98638	556	0.98638	276	0.98638	296
0.98943	281	0.98943	586	0.98943	283	0.98943	314
0.99249	293	0.99249	606	0.99249	299	0.99249	339
0.99554	298	0.99554	623	0.99554	290	0.99554	372
0.99859	306	0.99859	675	0.99859	336	0.99859	339
1.00165	325	1.00165	698	1.00165	317	1.00165	379
1.0047	302	1.0047	736	1.0047	385	1.0047	403
1.00776	357	1.00776	704	1.00776	383	1.00776	412
1.01081	352	1.01081	772	1.01081	363	1.01081	424
1.01386	358	1.01386	802	1.01386	443	1.01386	431
1.01692	376	1.01692	868	1.01692	403	1.01692	458
1.01997	427	1.01997	851	1.01997	406	1.01997	491
1.02303	459	1.02303	901	1.02303	485	1.02303	458
1.02608	482	1.02608	926	1.02608	435	1.02608	483
1.02913	392	1.02913	925	1.02913	476	1.02913	506
1.03219	482	1.03219	943	1.03219	500	1.03219	504
1.03524	429	1.03524	952	1.03524	496	1.03524	556
1.03829	492	1.03829	1052	1.03829	545	1.03829	555
1.04135	496	1.04135	1068	1.04135	542	1.04135	550
1.0444	486	1.0444	1093	1.0444	562	1.0444	591
1.04746	505	1.04746	1013	1.04746	587	1.04746	592
1.05051	479	1.05051	1107	1.05051	565	1.05051	575
1.05356	572	1.05356	1141	1.05356	603	1.05356	636
1.05662	564	1.05662	1206	1.05662	616	1.05662	650
1.05967	602	1.05967	1225	1.05967	621	1.05967	626
1.06272	592	1.06272	1248	1.06272	621	1.06272	583
1.06578	576	1.06578	1239	1.06578	704	1.06578	685
1.06883	610	1.06883	1207	1.06883	671	1.06883	675
1.07189	601	1.07189	1203	1.07189	645	1.07189	662
1.07494	615	1.07494	1261	1.07494	662	1.07494	682
1.07799	619	1.07799	1374	1.07799	706	1.07799	686
1.08105	630	1.08105	1221	1.08105	687	1.08105	737
1.0841	670	1.0841	1316	1.0841	719	1.0841	742
1.08716	662	1.08716	1271	1.08716	752	1.08716	742
1.09021	680	1.09021	1279	1.09021	728	1.09021	764
1.09326	655	1.09326	1343	1.09326	770	1.09326	741
1.09632	699	1.09632	1318	1.09632	735	1.09632	774
1.09937	665	1.09937	1396	1.09937	744	1.09937	794
1.10242	677	1.10242	1440	1.10242	761	1.10242	820
1.10548	697	1.10548	1443	1.10548	809	1.10548	831
1.10853	716	1.10853	1471	1.10853	821	1.10853	764
1.11159	701	1.11159	1439	1.11159	836	1.11159	806
1.11464	719	1.11464	1519	1.11464	864	1.11464	857
1.11769	707	1.11769	1389	1.11769	829	1.11769	824
1.12075	733	1.12075	1555	1.12075	843	1.12075	792
1.1238	719	1.1238	1475	1.1238	843	1.1238	838
1.12685	791	1.12685	1447	1.12685	852	1.12685	881
1.12991	802	1.12991	1545	1.12991	838	1.12991	877
1.13296	786	1.13296	1530	1.13296	904	1.13296	810
1.13602	843	1.13602	1553	1.13602	835	1.13602	862
1.13907	787	1.13907	1570	1.13907	905	1.13907	862
1.14212	760	1.14212	1488	1.14212	916	1.14212	931
1.14518	823	1.14518	1481	1.14518	844	1.14518	896
1.14823	785	1.14823	1533	1.14823	885	1.14823	864
1.15129	809	1.15129	1621	1.15129	967	1.15129	915
1.15434	839	1.15434	1677	1.15434	924	1.15434	878
1.15739	777	1.15739	1652	1.15739	893	1.15739	903
1.16045	844	1.16045	1643	1.16045	931	1.16045	906
1.1635	788	1.1635	1597	1.1635	915	1.1635	889
1.16655	785	1.16655	1650	1.16655	944	1.16655	927
1.16961	821	1.16961	1635	1.16961	929	1.16961	879
1.17266	790	1.17266	1617	1.17266	936	1.17266	874
1.17572	838	1.17572	1668	1.17572	984	1.17572	905
1.17877	850	1.17877	1615	1.17877	981	1.17877	896
1.18182	810	1.18182	1690	1.18182	953	1.18182	924
1.18488	846	1.18488	1662	1.18488	960	1.18488	884
1.18793	796	1.18793	1683	1.18793	996	1.18793	977
1.19098	846	1.19098	1593	1.19098	977	1.19098	875
1.19404	872	1.19404	1697	1.19404	1005	1.19404	893
1.19709	855	1.19709	1642	1.19709	1007	1.19709	943
1.20015	771	1.20015	1656	1.20015	965	1.20015	981
1.2032	837	1.2032	1712	1.2032	983	1.2032	920
1.20625	877	1.20625	1652	1.20625	1016	1.20625	913
1.20931	848	1.20931	1664	1.20931	1021	1.20931	941
1.21236	852	1.21236	1649	1.21236	921	1.21236	931
1.21542	858	1.21542	1652	1.21542	994	1.21542	958
1.21847	847	1.21847	1715	1.21847	1035	1.21847	900
1.22152	829	1.22152	1662	1.22152	981	1.22152	905
1.22458	809	1.22458	1635	1.22458	968	1.22458	945
1.22763	874	1.22763	1716	1.22763	1062	1.22763	978
1.23068	877	1.23068	1630	1.23068	967	1.23068	886
1.23374	808	1.23374	1673	1.23374	974	1.23374	918
1.23679	834	1.23679	1618	1.23679	985	1.23679	890
1.23985	793	1.23985	1619	1.23985	1037	1.23985	881
1.2429	862	1.2429	1641	1.2429	1015	1.2429	944
1.24595	882	1.24595	1664	1.24595	983	1.24595	970
1.24901	835	1.24901	1668	1.24901	903	1.24901	881
1.25206	812	1.25206	1638	1.25206	993	1.25206	913
1.25511	798	1.25511	1604	1.25511	997	1.25511	901
1.25817	795	1.25817	1605	1.25817	1028	1.25817	922
1.26122	875	1.26122	1670	1.26122	973	1.26122	911
1.26428	842	1.26428	1648	1.26428	988	1.26428	921
1.26733	770	1.26733	1593	1.26733	1020	1.26733	903
1.27038	845	1.27038	1527	1.27038	931	1.27038	866
1.27344	823	1.27344	1583	1.27344	964	1.27344	914
1.27649	776	1.27649	1612	1.27649	991	1.27649	866
1.27955	804	1.27955	1623	1.27955	999	1.27955	899
1.2826	811	1.2826	1575	1.2826	962	1.2826	925
1.28565	816	1.28565	1641	1.28565	932	1.28565	950
1.28871	781	1.28871	1472	1.28871	974	1.28871	863
1.29176	762	1.29176	1596	1.29176	993	1.29176	871
1.29481	784	1.29481	1569	1.29481	984	1.29481	891
1.29787	802	1.29787	1606	1.29787	982	1.29787	863
1.30092	840	1.30092	1527	1.30092	977	1.30092	861
1.30398	808	1.30398	1544	1.30398	973	1.30398	860
1.30703	821	1.30703	1565	1.30703	982	1.30703	946
1.31008	801	1.31008	1548	1.31008	961	1.31008	871
1.31314	775	1.31314	1545	1.31314	945	1.31314	904
1.31619	780	1.31619	1472	1.31619	962	1.31619	871
1.31924	764	1.31924	1497	1.31924	977	1.31924	879
1.3223	772	1.3223	1476	1.3223	967	1.3223	872
1.32535	792	1.32535	1478	1.32535	978	1.32535	864
1.32841	781	1.32841	1422	1.32841	895	1.32841	845
1.33146	723	1.33146	1575	1.33146	861	1.33146	852
1.33451	743	1.33451	1464	1.33451	911	1.33451	836
1.33757	755	1.33757	1485	1.33757	903	1.33757	869
1.34062	729	1.34062	1400	1.34062	888	1.34062	841
1.34368	765	1.34368	1407	1.34368	908	1.34368	816
1.34673	672	1.34673	1385	1.34673	880	1.34673	809
1.34978	710	1.34978	1395	1.34978	912	1.34978	767
1.35284	746	1.35284	1422	1.35284	904	1.35284	862
1.35589	735	1.35589	1357	1.35589	904	1.35589	812
1.35894	728	1.35894	1390	1.35894	906	1.35894	771
1.362	755	1.362	1350	1.362	855	1.362	816
1.36505	740	1.36505	1292	1.36505	897	1.36505	726
1.36811	696	1.36811	1338	1.36811	857	1.36811	826
1.37116	676	1.37116	1349	1.37116	894	1.37116	768
1.37421	715	1.37421	1323	1.37421	895	1.37421	766
1.37727	667	1.37727	1278	1.37727	897	1.37727	772
1.38032	719	1.38032	1330	1.38032	841	1.38032	746
1.38337	664	1.38337	1267	1.38337	904	1.38337	762
1.38643	669	1.38643	1314	1.38643	814	1.38643	688
1.38948	684	1.38948	1375	1.38948	864	1.38948	689
1.39254	682	1.39254	1277	1.39254	779	1.39254	722
1.39559	661	1.39559	1245	1.39559	773	1.39559	754
1.39864	695	1.39864	1246	1.39864	811	1.39864	733
1.4017	652	1.4017	1196	1.4017	768	1.4017	728
1.40475	707	1.40475	1240	1.40475	775	1.40475	740
1.40781	601	1.40781	1182	1.40781	744	1.40781	735
1.41086	645	1.41086	1239	1.41086	811	1.41086	762
1.41391	614	1.41391	1205	1.41391	841	1.41391	692
1.41697	661	1.41697	1206	1.41697	795	1.41697	746
1.42002	640	1.42002	1186	1.42002	797	1.42002	731
1.42307	616	1.42307	1193	1.42307	807	1.42307	694
1.42613	635	1.42613	1208	1.42613	773	1.42613	685
1.42918	642	1.42918	1126	1.42918	736	1.42918	722
1.43224	590	1.43224	1152	1.43224	781	1.43224	706
1.43529	655	1.43529	1164	1.43529	742	1.43529	688
1.43834	588	1.43834	1157	1.43834	773	1.43834	688
1.4414	656	1.4414	1163	1.4414	778	1.4414	617
1.44445	589	1.44445	1100	1.44445	755	1.44445	658
1.4475	596	1.4475	1149	1.4475	719	1.4475	585
1.45056	567	1.45056	1094	1.45056	751	1.45056	658
1.45361	600	1.45361	1114	1.45361	716	1.45361	618
1.45667	567	1.45667	1176	1.45667	789	1.45667	641
1.45972	608	1.45972	1117	1.45972	711	1.45972	657
1.46277	582	1.46277	1079	1.46277	701	1.46277	673
1.46583	526	1.46583	1068	1.46583	671	1.46583	643
1.46888	554	1.46888	1100	1.46888	671	1.46888	621
1.47193	560	1.47193	1103	1.47193	675	1.47193	646
1.47499	564	1.47499	1130	1.47499	690	1.47499	630
1.47804	524	1.47804	1109	1.47804	674	1.47804	597
1.4811	578	1.4811	1028	1.4811	689	1.4811	641
1.48415	547	1.48415	1064	1.48415	703	1.48415	621
1.4872	562	1.4872	1063	1.4872	705	1.4872	591
1.49026	545	1.49026	1055	1.49026	650	1.49026	601
1.49331	553	1.49331	1067	1.49331	703	1.49331	585
1.49637	512	1.49637	1085	1.49637	657	1.49637	599
1.49942	500	1.49942	1032	1.49942	651	1.49942	653
1.50247	531	1.50247	1015	1.50247	713	1.50247	587
1.50553	568	1.50553	969	1.50553	652	1.50553	587
1.50858	536	1.50858	1026	1.50858	663	1.50858	613
1.51163	547	1.51163	1020	1.51163	659	1.51163	598
1.51469	563	1.51469	1016	1.51469	652	1.51469	618
1.51774	529	1.51774	1003	1.51774	660	1.51774	527
1.5208	499	1.5208	938	1.5208	628	1.5208	579
1.52385	520	1.52385	925	1.52385	681	1.52385	595
1.5269	525	1.5269	949	1.5269	628	1.5269	593
1.52996	541	1.52996	985	1.52996	649	1.52996	591
1.53301	529	1.53301	950	1.53301	635	1.53301	555
1.53606	543	1.53606	893	1.53606	650	1.53606	567
1.53912	504	1.53912	937	1.53912	620	1.53912	603
1.54217	503	1.54217	963	1.54217	617	1.54217	544
1.54523	515	1.54523	903	1.54523	630	1.54523	585
1.54828	457	1.54828	904	1.54828	634	1.54828	586
1.55133	519	1.55133	936	1.55133	619	1.55133	563
1.55439	467	1.55439	943	1.55439	603	1.55439	574
1.55744	466	1.55744	961	1.55744	629	1.55744	549
1.5605	469	1.5605	972	1.5605	603	1.5605	516
1.56355	510	1.56355	864	1.56355	600	1.56355	584
1.5666	473	1.5666	962	1.5666	626	1.5666	545
1.56966	454	1.56966	860	1.56966	576	1.56966	552
1.57271	441	1.57271	926	1.57271	644	1.57271	549
1.57576	463	1.57576	901	1.57576	583	1.57576	503
1.57882	453	1.57882	880	1.57882	623	1.57882	487
1.58187	507	1.58187	872	1.58187	590	1.58187	519
1.58493	433	1.58493	877	1.58493	567	1.58493	538
1.58798	455	1.58798	931	1.58798	581	1.58798	524
1.59103	469	1.59103	865	1.59103	548	1.59103	544
1.59409	480	1.59409	834	1.59409	598	1.59409	511
1.59714	457	1.59714	829	1.59714	590	1.59714	505
1.60019	414	1.60019	831	1.60019	621	1.60019	553
1.60325	445	1.60325	849	1.60325	554	1.60325	526
1.6063	432	1.6063	841	1.6063	532	1.6063	486
1.60936	412	1.60936	839	1.60936	563	1.60936	480
1.61241	397	1.61241	801	1.61241	507	1.61241	506
1.61546	428	1.61546	821	1.61546	544	1.61546	511
1.61852	457	1.61852	842	1.61852	541	1.61852	487
1.62157	432	1.62157	776	1.62157	546	1.62157	488
1.62463	431	1.62463	791	1.62463	541	1.62463	473
1.62768	412	1.62768	765	1.62768	554	1.62768	507
1.63073	400	1.63073	781	1.63073	571	1.63073	494
1.63379	432	1.63379	785	1.63379	510	1.63379	463
1.63684	416	1.63684	789	1.63684	541	1.63684	447
1.63989	420	1.63989	838	1.63989	495	1.63989	501
1.64295	438	1.64295	756	1.64295	503	1.64295	453
1.646	389	1.646	744	1.646	526	1.646	447
1.64906	397	1.64906	795	1.64906	494	1.64906	471
1.65211	387	1.65211	744	1.65211	524	1.65211	459
1.65516	450	1.65516	702	1.65516	468	1.65516	428
1.65822	408	1.65822	738	1.65822	496	1.65822	497
1.66127	416	1.66127	723	1.66127	509	1.66127	433
1.66432	390	1.66432	730	1.66432	456	1.66432	455
1.66738	394	1.66738	756	1.66738	486	1.66738	425
1.67043	374	1.67043	695	1.67043	460	1.67043	436
1.67349	375	1.67349	785	1.67349	456	1.67349	455
1.67654	380	1.67654	716	1.67654	458	1.67654	421
1.67959	387	1.67959	693	1.67959	449	1.67959	440
1.68265	366	1.68265	683	1.68265	473	1.68265	395
1.6857	344	1.6857	697	1.6857	467	1.6857	400
1.68876	342	1.68876	711	1.68876	491	1.68876	430
1.69181	353	1.69181	685	1.69181	444	1.69181	409
1.69486	391	1.69486	676	1.69486	442	1.69486	436
1.69792	370	1.69792	630	1.69792	405	1.69792	417
1.70097	344	1.70097	656	1.70097	425	1.70097	395
1.70402	334	1.70402	673	1.70402	440	1.70402	372
1.70708	308	1.70708	643	1.70708	470	1.70708	395
1.71013	334	1.71013	661	1.71013	380	1.71013	403
1.71319	311	1.71319	661	1.71319	463	1.71319	402
1.71624	340	1.71624	617	1.71624	419	1.71624	379
1.71929	361	1.71929	638	1.71929	448	1.71929	365
1.72235	316	1.72235	631	1.72235	455	1.72235	376
1.7254	324	1.7254	592	1.7254	419	1.7254	411
1.72845	327	1.72845	595	1.72845	440	1.72845	386
1.73151	337	1.73151	622	1.73151	436	1.73151	385
1.73456	351	1.73456	583	1.73456	385	1.73456	377
1.73762	348	1.73762	644	1.73762	402	1.73762	357
1.74067	324	1.74067	592	1.74067	386	1.74067	379
1.74372	308	1.74372	588	1.74372	394	1.74372	394
1.74678	295	1.74678	590	1.74678	376	1.74678	414
1.74983	313	1.74983	589	1.74983	383	1.74983	393
1.75289	335	1.75289	607	1.75289	428	1.75289	363
1.75594	332	1.75594	563	1.75594	398	1.75594	349
1.75899	291	1.75899	614	1.75899	352	1.75899	377
1.76205	302	1.76205	601	1.76205	392	1.76205	336
1.7651	324	1.7651	573	1.7651	391	1.7651	367
1.76815	317	1.76815	529	1.76815	383	1.76815	334
1.77121	308	1.77121	547	1.77121	372	1.77121	358
1.77426	285	1.77426	516	1.77426	366	1.77426	345
1.77732	278	1.77732	575	1.77732	368	1.77732	348
1.78037	309	1.78037	537	1.78037	358	1.78037	348
1.78342	292	1.78342	556	1.78342	341	1.78342	352
1.78648	313	1.78648	500	1.78648	366	1.78648	356
1.78953	296	1.78953	587	1.78953	364	1.78953	354
1.79258	285	1.79258	574	1.79258	374	1.79258	342
1.79564	266	1.79564	547	1.79564	347	1.79564	345
1.79869	299	1.79869	531	1.79869	358	1.79869	360
1.80175	281	1.80175	545	1.80175	347	1.80175	309
1.8048	274	1.8048	516	1.8048	363	1.8048	341
1.80785	283	1.80785	539	1.80785	323	1.80785	306
1.81091	316	1.81091	478	1.81091	381	1.81091	313
1.81396	262	1.81396	534	1.81396	379	1.81396	320
1.81702	279	1.81702	508	1.81702	379	1.81702	301
1.82007	278	1.82007	525	1.82007	367	1.82007	327
1.82312	258	1.82312	499	1.82312	325	1.82312	318
1.82618	273	1.82618	572	1.82618	302	1.82618	292
1.82923	279	1.82923	529	1.82923	399	1.82923	310
1.83228	306	1.83228	496	1.83228	328	1.83228	321
1.83534	277	1.83534	461	1.83534	346	1.83534	323
1.83839	287	1.83839	478	1.83839	334	1.83839	317
1.84145	284	1.84145	542	1.84145	345	1.84145	351
1.8445	307	1.8445	494	1.8445	306	1.8445	366
1.84755	264	1.84755	506	1.84755	327	1.84755	316
1.85061	264	1.85061	465	1.85061	339	1.85061	316
1.85366	248	1.85366	510	1.85366	332	1.85366	354
1.85671	272	1.85671	453	1.85671	337	1.85671	290
1.85977	314	1.85977	530	1.85977	352	1.85977	308
1.86282	304	1.86282	501	1.86282	302	1.86282	297
1.86588	280	1.86588	490	1.86588	302	1.86588	300
1.86893	292	1.86893	485	1.86893	328	1.86893	316
1.87198	266	1.87198	503	1.87198	341	1.87198	284
1.87504	252	1.87504	471	1.87504	319	1.87504	314
1.87809	252	1.87809	426	1.87809	374	1.87809	293
1.88115	251	1.88115	475	1.88115	331	1.88115	312
1.8842	267	1.8842	477	1.8842	338	1.8842	275
1.88725	270	1.88725	462	1.88725	333	1.88725	348
1.89031	253	1.89031	461	1.89031	328	1.89031	283
1.89336	276	1.89336	502	1.89336	322	1.89336	319
1.89641	264	1.89641	492	1.89641	297	1.89641	290
1.89947	277	1.89947	426	1.89947	301	1.89947	309
1.90252	272	1.90252	452	1.90252	315	1.90252	300
1.90558	257	1.90558	425	1.90558	322	1.90558	288
1.90863	242	1.90863	441	1.90863	318	1.90863	286
1.91168	238	1.91168	454	1.91168	323	1.91168	321
1.91474	244	1.91474	474	1.91474	322	1.91474	280
1.91779	214	1.91779	465	1.91779	317	1.91779	299
1.92084	237	1.92084	452	1.92084	332	1.92084	320
1.9239	261	1.9239	455	1.9239	318	1.9239	267
1.92695	234	1.92695	466	1.92695	333	1.92695	306
1.93001	245	1.93001	441	1.93001	292	1.93001	336
1.93306	238	1.93306	433	1.93306	280	1.93306	259
1.93611	250	1.93611	432	1.93611	294	1.93611	291
1.93917	245	1.93917	452	1.93917	312	1.93917	282
1.94222	252	1.94222	434	1.94222	307	1.94222	294
1.94528	261	1.94528	463	1.94528	334	1.94528	323
1.94833	238	1.94833	444	1.94833	286	1.94833	267
1.95138	234	1.95138	436	1.95138	298	1.95138	247
1.95444	255	1.95444	460	1.95444	328	1.95444	305
1.95749	226	1.95749	438	1.95749	309	1.95749	275
1.96054	249	1.96054	460	1.96054	313	1.96054	275
1.9636	267	1.9636	436	1.9636	297	1.9636	277
1.96665	231	1.96665	445	1.96665	281	1.96665	261
1.96971	233	1.96971	429	1.96971	263	1.96971	256
1.97276	230	1.97276	416	1.97276	292	1.97276	259
1.97581	262	1.97581	414	1.97581	276	1.97581	278
1.97887	239	1.97887	429	1.97887	297	1.97887	275
1.98192	215	1.98192	411	1.98192	302	1.98192	263
1.98497	200	1.98497	432	1.98497	291	1.98497	272
1.98803	205	1.98803	396	1.98803	268	1.98803	269
1.99108	223	1.99108	400	1.99108	304	1.99108	254
1.99414	236	1.99414	410	1.99414	286	1.99414	263
1.99719	210	1.99719	374	1.99719	268	1.99719	266
2.00024	223	2.00024	391	2.00024	283	2.00024	247
2.0033	214	2.0033	426	2.0033	280	2.0033	276
2.00635	225	2.00635	376	2.00635	301	2.00635	248
2.0094	209	2.0094	396	2.0094	278	2.0094	264
2.01246	205	2.01246	415	2.01246	268	2.01246	267
2.01551	241	2.01551	370	2.01551	290	2.01551	238
2.01857	220	2.01857	398	2.01857	264	2.01857	250
2.02162	215	2.02162	415	2.02162	259	2.02162	263
2.02467	230	2.02467	366	2.02467	260	2.02467	258
2.02773	216	2.02773	381	2.02773	250	2.02773	269
2.03078	208	2.03078	351	2.03078	270	2.03078	231
2.03384	230	2.03384	394	2.03384	251	2.03384	274
2.03689	215	2.03689	397	2.03689	266	2.03689	241
2.03994	212	2.03994	378	2.03994	270	2.03994	214
2.043	198	2.043	382	2.043	249	2.043	264
2.04605	207	2.04605	367	2.04605	261	2.04605	227
2.0491	206	2.0491	343	2.0491	255	2.0491	231
2.05216	201	2.05216	380	2.05216	267	2.05216	245
2.05521	225	2.05521	362	2.05521	241	2.05521	250
2.05827	228	2.05827	371	2.05827	251	2.05827	245
2.06132	215	2.06132	370	2.06132	262	2.06132	256
2.06437	208	2.06437	347	2.06437	254	2.06437	223
2.06743	205	2.06743	360	2.06743	265	2.06743	225
2.07048	209	2.07048	362	2.07048	265	2.07048	227
2.07353	186	2.07353	382	2.07353	252	2.07353	221
2.07659	196	2.07659	349	2.07659	245	2.07659	230
2.07964	164	2.07964	380	2.07964	254	2.07964	227
2.0827	196	2.0827	356	2.0827	223	2.0827	227
2.08575	195	2.08575	333	2.08575	230	2.08575	214
2.0888	180	2.0888	347	2.0888	239	2.0888	254
2.09186	188	2.09186	377	2.09186	229	2.09186	209
2.09491	192	2.09491	354	2.09491	229	2.09491	220
2.09797	202	2.09797	323	2.09797	265	2.09797	204
2.10102	173	2.10102	322	2.10102	211	2.10102	220
2.10407	192	2.10407	322	2.10407	242	2.10407	247
2.10713	192	2.10713	322	2.10713	250	2.10713	236
2.11018	179	2.11018	331	2.11018	218	2.11018	202
2.11323	162	2.11323	317	2.11323	232	2.11323	206
2.11629	184	2.11629	336	2.11629	245	2.11629	210
2.11934	169	2.11934	322	2.11934	238	2.11934	203
2.1224	175	2.1224	310	2.1224	203	2.1224	219
2.12545	170	2.12545	280	2.12545	240	2.12545	211
2.1285	167	2.1285	353	2.1285	221	2.1285	195
2.13156	178	2.13156	308	2.13156	232	2.13156	203
2.13461	164	2.13461	315	2.13461	247	2.13461	213
2.13766	199	2.13766	333	2.13766	243	2.13766	204
2.14072	166	2.14072	321	2.14072	231	2.14072	224
2.14377	165	2.14377	322	2.14377	201	2.14377	208
2.14683	172	2.14683	308	2.14683	185	2.14683	195
2.14988	189	2.14988	317	2.14988	218	2.14988	182
2.15293	204	2.15293	324	2.15293	189	2.15293	198
2.15599	182	2.15599	292	2.15599	219	2.15599	201
2.15904	168	2.15904	340	2.15904	230	2.15904	183
2.1621	175	2.1621	306	2.1621	239	2.1621	213
2.16515	162	2.16515	301	2.16515	213	2.16515	198
2.1682	170	2.1682	317	2.1682	206	2.1682	194
2.17126	153	2.17126	287	2.17126	234	2.17126	188
2.17431	178	2.17431	315	2.17431	207	2.17431	192
2.17736	176	2.17736	318	2.17736	205	2.17736	195
2.18042	168	2.18042	299	2.18042	207	2.18042	185
2.18347	173	2.18347	304	2.18347	211	2.18347	198
2.18653	158	2.18653	324	2.18653	178	2.18653	180
2.18958	159	2.18958	305	2.18958	219	2.18958	184
2.19263	157	2.19263	284	2.19263	191	2.19263	194
2.19569	165	2.19569	297	2.19569	205	2.19569	192
2.19874	147	2.19874	291	2.19874	219	2.19874	177
2.20179	155	2.20179	296	2.20179	208	2.20179	195
2.20485	169	2.20485	276	2.20485	184	2.20485	179
2.2079	166	2.2079	280	2.2079	203	2.2079	207
2.21096	142	2.21096	312	2.21096	181	2.21096	187
2.21401	152	2.21401	306	2.21401	216	2.21401	177
2.21706	158	2.21706	281	2.21706	223	2.21706	176
2.22012	143	2.22012	279	2.22012	219	2.22012	183
2.22317	168	2.22317	293	2.22317	224	2.22317	172
2.22623	154	2.22623	281	2.22623	197	2.22623	170
2.22928	159	2.22928	297	2.22928	183	2.22928	198
2.23233	137	2.23233	290	2.23233	222	2.23233	188
2.23539	141	2.23539	318	2.23539	190	2.23539	186
2.23844	152	2.23844	277	2.23844	187	2.23844	194
2.24149	152	2.24149	260	2.24149	196	2.24149	174
2.24455	164	2.24455	241	2.24455	193	2.24455	168
2.2476	132	2.2476	281	2.2476	198	2.2476	170
2.25066	157	2.25066	283	2.25066	195	2.25066	170
2.25371	143	2.25371	286	2.25371	180	2.25371	161
2.25676	125	2.25676	279	2.25676	177	2.25676	169
2.25982	154	2.25982	265	2.25982	210	2.25982	201
2.26287	131	2.26287	276	2.26287	192	2.26287	193
2.26592	142	2.26592	268	2.26592	201	2.26592	162
2.26898	161	2.26898	269	2.26898	196	2.26898	185
2.27203	159	2.27203	253	2.27203	177	2.27203	168
2.27509	139	2.27509	249	2.27509	194	2.27509	160
2.27814	154	2.27814	263	2.27814	175	2.27814	136
2.28119	146	2.28119	260	2.28119	179	2.28119	204
2.28425	135	2.28425	272	2.28425	158	2.28425	175
2.2873	161	2.2873	257	2.2873	170	2.2873	175
2.29036	165	2.29036	272	2.29036	167	2.29036	185
2.29341	144	2.29341	225	2.29341	167	2.29341	168
2.29646	168	2.29646	273	2.29646	158	2.29646	170
2.29952	166	2.29952	277	2.29952	175	2.29952	179
2.30257	130	2.30257	248	2.30257	192	2.30257	171
2.30562	146	2.30562	251	2.30562	166	2.30562	158
2.30868	149	2.30868	248	2.30868	189	2.30868	164
2.31173	141	2.31173	274	2.31173	176	2.31173	165
2.31479	153	2.31479	260	2.31479	167	2.31479	195
2.31784	116	2.31784	257	2.31784	182	2.31784	189
2.32089	126	2.32089	257	2.32089	173	2.32089	127
2.32395	152	2.32395	247	2.32395	175	2.32395	178
2.327	132	2.327	254	2.327	169	2.327	179
2.33005	129	2.33005	244	2.33005	172	2.33005	163
2.33311	131	2.33311	247	2.33311	186	2.33311	152
2.33616	121	2.33616	211	2.33616	169	2.33616	160
2.33922	148	2.33922	251	2.33922	182	2.33922	185
2.34227	126	2.34227	268	2.34227	179	2.34227	182
2.34532	162	2.34532	216	2.34532	191	2.34532	174
2.34838	122	2.34838	250	2.34838	176	2.34838	153
2.35143	133	2.35143	257	2.35143	167	2.35143	164
2.35449	131	2.35449	222	2.35449	145	2.35449	166
2.35754	118	2.35754	243	2.35754	159	2.35754	147
2.36059	147	2.36059	265	2.36059	133	2.36059	154
2.36365	154	2.36365	257	2.36365	149	2.36365	160
2.3667	142	2.3667	234	2.3667	138	2.3667	176
2.36975	108	2.36975	289	2.36975	152	2.36975	142
2.37281	142	2.37281	272	2.37281	179	2.37281	169
2.37586	139	2.37586	242	2.37586	174	2.37586	143
2.37892	136	2.37892	257	2.37892	177	2.37892	154
2.38197	132	2.38197	214	2.38197	149	2.38197	163
2.38502	137	2.38502	236	2.38502	161	2.38502	138
2.38808	127	2.38808	261	2.38808	154	2.38808	147
2.39113	100	2.39113	218	2.39113	190	2.39113	165
2.39418	147	2.39418	241	2.39418	148	2.39418	163
2.39724	122	2.39724	231	2.39724	162	2.39724	166
2.40029	111	2.40029	239	2.40029	171	2.40029	149
2.40335	107	2.40335	191	2.40335	177	2.40335	137
2.4064	143	2.4064	227	2.4064	181	2.4064	156
2.40945	111	2.40945	225	2.40945	160	2.40945	147
2.41251	131	2.41251	252	2.41251	179	2.41251	151
2.41556	91	2.41556	233	2.41556	159	2.41556	138
2.41862	115	2.41862	214	2.41862	164	2.41862	127
2.42167	130	2.42167	216	2.42167	147	2.42167	148
2.42472	136	2.42472	243	2.42472	138	2.42472	135
2.42778	127	2.42778	216	2.42778	176	2.42778	150
2.43083	120	2.43083	232	2.43083	155	2.43083	145
2.43388	128	2.43388	226	2.43388	150	2.43388	126
2.43694	100	2.43694	211	2.43694	166	2.43694	140
2.43999	125	2.43999	213	2.43999	153	2.43999	134
2.44305	127	2.44305	224	2.44305	134	2.44305	137
2.4461	130	2.4461	213	2.4461	170	2.4461	152
2.44915	127	2.44915	248	2.44915	157	2.44915	133
2.45221	118	2.45221	221	2.45221	144	2.45221	138
2.45526	113	2.45526	208	2.45526	149	2.45526	131
2.45831	114	2.45831	225	2.45831	148	2.45831	138
2.46137	117	2.46137	200	2.46137	145	2.46137	147
2.46442	109	2.46442	251	2.46442	159	2.46442	132
2.46748	127	2.46748	188	2.46748	139	2.46748	135
2.47053	124	2.47053	241	2.47053	157	2.47053	153
2.47358	112	2.47358	218	2.47358	161	2.47358	135
2.47664	109	2.47664	211	2.47664	146	2.47664	147
2.47969	119	2.47969	214	2.47969	144	2.47969	128
2.48275	104	2.48275	191	2.48275	136	2.48275	137
2.4858	103	2.4858	214	2.4858	150	2.4858	126
2.48885	119	2.48885	196	2.48885	135	2.48885	127
2.49191	130	2.49191	202	2.49191	146	2.49191	153
2.49496	124	2.49496	206	2.49496	138	2.49496	157
2.49801	122	2.49801	212	2.49801	130	2.49801	130
2.50107	114	2.50107	194	2.50107	153	2.50107	123
2.50412	117	2.50412	210	2.50412	148	2.50412	118
2.50718	112	2.50718	177	2.50718	133	2.50718	135
2.51023	132	2.51023	197	2.51023	146	2.51023	152
2.51328	112	2.51328	191	2.51328	153	2.51328	144
2.51634	112	2.51634	184	2.51634	138	2.51634	153
2.51939	96	2.51939	211	2.51939	131	2.51939	133
2.52244	93	2.52244	171	2.52244	146	2.52244	134
2.5255	109	2.5255	174	2.5255	141	2.5255	129
2.52855	107	2.52855	159	2.52855	136	2.52855	121
2.53161	137	2.53161	199	2.53161	138	2.53161	126
2.53466	120	2.53466	195	2.53466	157	2.53466	123
2.53771	99	2.53771	179	2.53771	152	2.53771	151
2.54077	98	2.54077	166	2.54077	133	2.54077	108
2.54382	107	2.54382	175	2.54382	140	2.54382	133
2.54688	89	2.54688	178	2.54688	135	2.54688	132
2.54993	114	2.54993	202	2.54993	124	2.54993	98
2.55298	107	2.55298	184	2.55298	131	2.55298	122
2.55604	141	2.55604	198	2.55604	120	2.55604	125
2.55909	104	2.55909	179	2.55909	128	2.55909	125
2.56214	103	2.56214	192	2.56214	135	2.56214	114
2.5652	128	2.5652	200	2.5652	148	2.5652	128
2.56825	89	2.56825	198	2.56825	135	2.56825	124
2.57131	97	2.57131	203	2.57131	123	2.57131	131
2.57436	99	2.57436	204	2.57436	114	2.57436	135
2.57741	105	2.57741	201	2.57741	141	2.57741	112
2.58047	109	2.58047	165	2.58047	117	2.58047	147
2.58352	100	2.58352	191	2.58352	145	2.58352	122
2.58657	102	2.58657	190	2.58657	130	2.58657	118
2.58963	118	2.58963	222	2.58963	111	2.58963	147
2.59268	99	2.59268	175	2.59268	127	2.59268	141
2.59574	93	2.59574	205	2.59574	125	2.59574	132
2.59879	101	2.59879	187	2.59879	132	2.59879	124
2.60184	106	2.60184	186	2.60184	122	2.60184	116
2.6049	87	2.6049	218	2.6049	134	2.6049	127
2.60795	116	2.60795	183	2.60795	118	2.60795	135
2.611	97	2.611	187	2.611	153	2.611	130
2.61406	109	2.61406	178	2.61406	122	2.61406	110
2.61711	106	2.61711	191	2.61711	107	2.61711	127
2.62017	105	2.62017	177	2.62017	128	2.62017	139
2.62322	94	2.62322	180	2.62322	124	2.62322	109
2.62627	108	2.62627	192	2.62627	124	2.62627	109
2.62933	102	2.62933	188	2.62933	113	2.62933	114
2.63238	124	2.63238	187	2.63238	121	2.63238	107
2.63544	98	2.63544	182	2.63544	122	2.63544	125
2.63849	105	2.63849	178	2.63849	148	2.63849	115
2.64154	98	2.64154	169	2.64154	158	2.64154	120
2.6446	89	2.6446	188	2.6446	112	2.6446	97
2.64765	107	2.64765	176	2.64765	143	2.64765	102
2.6507	110	2.6507	176	2.6507	124	2.6507	126
2.65376	87	2.65376	179	2.65376	124	2.65376	117
2.65681	95	2.65681	161	2.65681	119	2.65681	112
2.65987	101	2.65987	183	2.65987	120	2.65987	106
2.66292	104	2.66292	140	2.66292	140	2.66292	112
2.66597	87	2.66597	167	2.66597	97	2.66597	107
2.66903	94	2.66903	171	2.66903	114	2.66903	128
2.67208	93	2.67208	150	2.67208	132	2.67208	93
2.67513	99	2.67513	179	2.67513	101	2.67513	100
2.67819	96	2.67819	196	2.67819	103	2.67819	99
2.68124	82	2.68124	165	2.68124	119	2.68124	93
2.6843	100	2.6843	180	2.6843	126	2.6843	114
2.68735	86	2.68735	164	2.68735	124	2.68735	119
2.6904	102	2.6904	166	2.6904	120	2.6904	98
2.69346	103	2.69346	170	2.69346	124	2.69346	96
2.69651	91	2.69651	181	2.69651	139	2.69651	116
2.69957	102	2.69957	162	2.69957	119	2.69957	110
2.70262	87	2.70262	169	2.70262	105	2.70262	117
2.70567	95	2.70567	161	2.70567	129	2.70567	109
2.70873	89	2.70873	178	2.70873	139	2.70873	122
2.71178	91	2.71178	156	2.71178	118	2.71178	113
2.71483	86	2.71483	159	2.71483	123	2.71483	106
2.71789	104	2.71789	183	2.71789	122	2.71789	116
2.72094	88	2.72094	168	2.72094	98	2.72094	110
2.724	83	2.724	162	2.724	120	2.724	109
2.72705	89	2.72705	154	2.72705	121	2.72705	127
2.7301	93	2.7301	177	2.7301	107	2.7301	126
2.73316	87	2.73316	169	2.73316	124	2.73316	113
2.73621	100	2.73621	170	2.73621	114	2.73621	106
2.73926	106	2.73926	172	2.73926	122	2.73926	111
2.74232	82	2.74232	155	2.74232	144	2.74232	90
2.74537	101	2.74537	159	2.74537	101	2.74537	101
2.74843	79	2.74843	136	2.74843	119	2.74843	112
2.75148	84	2.75148	147	2.75148	118	2.75148	106
2.75453	84	2.75453	167	2.75453	118	2.75453	103
2.75759	87	2.75759	142	2.75759	107	2.75759	119
2.76064	92	2.76064	128	2.76064	115	2.76064	113
2.7637	88	2.7637	172	2.7637	125	2.7637	98
2.76675	87	2.76675	157	2.76675	109	2.76675	86
2.7698	97	2.7698	164	2.7698	111	2.7698	111
2.77286	60	2.77286	156	2.77286	109	2.77286	104
2.77591	82	2.77591	165	2.77591	110	2.77591	110
2.77896	91	2.77896	166	2.77896	111	2.77896	94
2.78202	78	2.78202	150	2.78202	107	2.78202	98
2.78507	90	2.78507	149	2.78507	118	2.78507	77
2.78813	89	2.78813	140	2.78813	121	2.78813	108
2.79118	70	2.79118	161	2.79118	87	2.79118	102
2.79423	88	2.79423	144	2.79423	104	2.79423	121
2.79729	76	2.79729	170	2.79729	104	2.79729	103
2.80034	78	2.80034	144	2.80034	97	2.80034	95
2.80339	91	2.80339	154	2.80339	101	2.80339	94
2.80645	82	2.80645	169	2.80645	88	2.80645	94
2.8095	94	2.8095	145	2.8095	95	2.8095	92
2.81256	85	2.81256	126	2.81256	78	2.81256	89
2.81561	91	2.81561	147	2.81561	88	2.81561	116
2.81866	92	2.81866	174	2.81866	98	2.81866	104
2.82172	95	2.82172	154	2.82172	92	2.82172	96
2.82477	74	2.82477	116	2.82477	121	2.82477	79
2.82783	74	2.82783	152	2.82783	93	2.82783	91
2.83088	72	2.83088	163	2.83088	91	2.83088	96
2.83393	90	2.83393	151	2.83393	104	2.83393	107
2.83699	75	2.83699	143	2.83699	111	2.83699	93
2.84004	97	2.84004	153	2.84004	104	2.84004	98
2.84309	92	2.84309	131	2.84309	88	2.84309	101
2.84615	81	2.84615	148	2.84615	119	2.84615	100
2.8492	77	2.8492	142	2.8492	87	2.8492	95
2.85226	63	2.85226	140	2.85226	83	2.85226	99
2.85531	83	2.85531	133	2.85531	111	2.85531	98
2.85836	75	2.85836	141	2.85836	92	2.85836	81
2.86142	75	2.86142	144	2.86142	110	2.86142	93
2.86447	91	2.86447	146	2.86447	98	2.86447	98
2.86752	90	2.86752	124	2.86752	102	2.86752	81
2.87058	83	2.87058	139	2.87058	111	2.87058	92
2.87363	68	2.87363	145	2.87363	107	2.87363	82
2.87669	78	2.87669	110	2.87669	104	2.87669	79
2.87974	73	2.87974	142	2.87974	100	2.87974	93
2.88279	74	2.88279	156	2.88279	94	2.88279	96
2.88585	82	2.88585	131	2.88585	110	2.88585	86
2.8889	74	2.8889	133	2.8889	77	2.8889	83
2.89196	65	2.89196	147	2.89196	98	2.89196	85
2.89501	83	2.89501	141	2.89501	92	2.89501	86
2.89806	68	2.89806	113	2.89806	85	2.89806	87
2.90112	65	2.90112	111	2.90112	85	2.90112	74
2.90417	81	2.90417	131	2.90417	88	2.90417	93
2.90722	72	2.90722	112	2.90722	94	2.90722	98
2.91028	82	2.91028	131	2.91028	99	2.91028	89
2.91333	88	2.91333	139	2.91333	109	2.91333	87
2.91639	78	2.91639	136	2.91639	90	2.91639	81
2.91944	76	2.91944	136	2.91944	102	2.91944	95
2.92249	79	2.92249	145	2.92249	102	2.92249	93
2.92555	81	2.92555	132	2.92555	74	2.92555	87
2.9286	95	2.9286	113	2.9286	106	2.9286	87
2.93165	69	2.93165	137	2.93165	98	2.93165	87
2.93471	68	2.93471	138	2.93471	108	2.93471	90
2.93776	75	2.93776	140	2.93776	92	2.93776	75
2.94082	77	2.94082	129	2.94082	95	2.94082	94
2.94387	79	2.94387	147	2.94387	92	2.94387	98
2.94692	88	2.94692	144	2.94692	90	2.94692	92
2.94998	77	2.94998	123	2.94998	105	2.94998	83
2.95303	72	2.95303	135	2.95303	87	2.95303	80
2.95609	88	2.95609	125	2.95609	83	2.95609	79
2.95914	59	2.95914	139	2.95914	78	2.95914	78
2.96219	94	2.96219	135	2.96219	97	2.96219	97
2.96525	85	2.96525	122	2.96525	94	2.96525	82
2.9683	84	2.9683	128	2.9683	88	2.9683	78
2.97135	77	2.97135	124	2.97135	106	2.97135	94
2.97441	68	2.97441	123	2.97441	97	2.97441	86
2.97746	83	2.97746	125	2.97746	96	2.97746	92
2.98052	72	2.98052	126	2.98052	90	2.98052	87
2.98357	90	2.98357	117	2.98357	78	2.98357	87
2.98662	74	2.98662	126	2.98662	88	2.98662	63
2.98968	62	2.98968	123	2.98968	89	2.98968	82
2.99273	73	2.99273	132	2.99273	84	2.99273	75
2.99578	77	2.99578	117	2.99578	73	2.99578	86
2.99884	75	2.99884	138	2.99884	109	2.99884	88
3.00189	53	3.00189	126	3.00189	82	3.00189	65
3.00495	75	3.00495	146	3.00495	92	3.00495	82
3.008	81	3.008	108	3.008	83	3.008	96
3.01105	74	3.01105	141	3.01105	102	3.01105	87
3.01411	73	3.01411	127	3.01411	61	3.01411	94
3.01716	87	3.01716	106	3.01716	98	3.01716	76
3.02022	69	3.02022	127	3.02022	84	3.02022	79
3.02327	66	3.02327	122	3.02327	83	3.02327	92
3.02632	83	3.02632	127	3.02632	118	3.02632	79
3.02938	90	3.02938	124	3.02938	91	3.02938	82
3.03243	78	3.03243	125	3.03243	89	3.03243	73
3.03548	67	3.03548	123	3.03548	94	3.03548	83
3.03854	55	3.03854	123	3.03854	86	3.03854	64
3.04159	65	3.04159	130	3.04159	90	3.04159	61
3.04465	92	3.04465	134	3.04465	85	3.04465	85
3.0477	63	3.0477	117	3.0477	105	3.0477	80
3.05075	66	3.05075	103	3.05075	79	3.05075	80
3.05381	68	3.05381	133	3.05381	79	3.05381	68
3.05686	82	3.05686	130	3.05686	77	3.05686	69
3.05991	55	3.05991	120	3.05991	97	3.05991	81
3.06297	60	3.06297	126	3.06297	83	3.06297	87
3.06602	77	3.06602	123	3.06602	85	3.06602	69
3.06908	71	3.06908	116	3.06908	68	3.06908	71
3.07213	70	3.07213	109	3.07213	95	3.07213	90
3.07518	66	3.07518	110	3.07518	89	3.07518	83
3.07824	67	3.07824	133	3.07824	102	3.07824	76
3.08129	64	3.08129	130	3.08129	75	3.08129	83
3.08435	58	3.08435	129	3.08435	70	3.08435	84
3.0874	76	3.0874	143	3.0874	92	3.0874	76
3.09045	60	3.09045	120	3.09045	83	3.09045	88
3.09351	74	3.09351	138	3.09351	89	3.09351	65
3.09656	84	3.09656	98	3.09656	86	3.09656	79
3.09961	60	3.09961	102	3.09961	84	3.09961	68
3.10267	67	3.10267	136	3.10267	80	3.10267	60
3.10572	70	3.10572	118	3.10572	83	3.10572	82
3.10878	61	3.10878	91	3.10878	79	3.10878	68
3.11183	60	3.11183	89	3.11183	71	3.11183	89
3.11488	58	3.11488	98	3.11488	95	3.11488	63
3.11794	66	3.11794	126	3.11794	78	3.11794	64
3.12099	66	3.12099	118	3.12099	88	3.12099	68
3.12404	65	3.12404	101	3.12404	98	3.12404	76
3.1271	48	3.1271	125	3.1271	81	3.1271	80
3.13015	67	3.13015	115	3.13015	76	3.13015	75
3.13321	64	3.13321	112	3.13321	83	3.13321	84
3.13626	64	3.13626	135	3.13626	94	3.13626	80
3.13931	85	3.13931	99	3.13931	89	3.13931	78
3.14237	46	3.14237	107	3.14237	79	3.14237	73
3.14542	81	3.14542	122	3.14542	81	3.14542	68
3.14847	62	3.14847	104	3.14847	92	3.14847	67
3.15153	76	3.15153	125	3.15153	66	3.15153	68
3.15458	67	3.15458	108	3.15458	83	3.15458	74
3.15764	76	3.15764	113	3.15764	79	3.15764	78
3.16069	64	3.16069	105	3.16069	69	3.16069	58
3.16374	57	3.16374	118	3.16374	65	3.16374	77
3.1668	58	3.1668	122	3.1668	76	3.1668	60
3.16985	59	3.16985	91	3.16985	75	3.16985	75
3.17291	63	3.17291	121	3.17291	81	3.17291	88
3.17596	68	3.17596	111	3.17596	81	3.17596	92
3.17901	72	3.17901	109	3.17901	79	3.17901	67
3.18207	54	3.18207	99	3.18207	68	3.18207	62
3.18512	60	3.18512	107	3.18512	81	3.18512	90
3.18817	68	3.18817	105	3.18817	98	3.18817	59
3.19123	67	3.19123	111	3.19123	72	3.19123	73
3.19428	60	3.19428	119	3.19428	83	3.19428	96
3.19734	60	3.19734	100	3.19734	77	3.19734	85
3.20039	77	3.20039	99	3.20039	73	3.20039	77
3.20344	65	3.20344	113	3.20344	77	3.20344	65
3.2065	53	3.2065	116	3.2065	76	3.2065	65
3.20955	56	3.20955	116	3.20955	82	3.20955	77
3.2126	76	3.2126	125	3.2126	64	3.2126	56
3.21566	51	3.21566	96	3.21566	83	3.21566	80
3.21871	52	3.21871	106	3.21871	85	3.21871	63
3.22177	58	3.22177	95	3.22177	80	3.22177	70
3.22482	48	3.22482	109	3.22482	76	3.22482	61
3.22787	57	3.22787	112	3.22787	76	3.22787	74
3.23093	55	3.23093	89	3.23093	89	3.23093	59
3.23398	48	3.23398	106	3.23398	82	3.23398	63
3.23704	48	3.23704	106	3.23704	78	3.23704	63
3.24009	45	3.24009	95	3.24009	69	3.24009	71
3.24314	71	3.24314	100	3.24314	75	3.24314	60
3.2462	74	3.2462	118	3.2462	83	3.2462	73
3.24925	59	3.24925	100	3.24925	82	3.24925	53
3.2523	61	3.2523	109	3.2523	74	3.2523	57
3.25536	52	3.25536	111	3.25536	85	3.25536	81
3.25841	67	3.25841	96	3.25841	80	3.25841	66
3.26147	64	3.26147	98	3.26147	107	3.26147	54
3.26452	45	3.26452	106	3.26452	78	3.26452	73
3.26757	46	3.26757	110	3.26757	89	3.26757	63
3.27063	63	3.27063	101	3.27063	79	3.27063	66
3.27368	47	3.27368	93	3.27368	73	3.27368	75
3.27673	64	3.27673	98	3.27673	79	3.27673	68
3.27979	56	3.27979	107	3.27979	68	3.27979	74
3.28284	63	3.28284	102	3.28284	80	3.28284	68
3.2859	51	3.2859	106	3.2859	68	3.2859	62
3.28895	51	3.28895	101	3.28895	70	3.28895	64
3.292	58	3.292	115	3.292	82	3.292	73
3.29506	55	3.29506	85	3.29506	64	3.29506	65
3.29811	63	3.29811	94	3.29811	61	3.29811	74
3.30117	40	3.30117	90	3.30117	82	3.30117	58
3.30422	50	3.30422	112	3.30422	79	3.30422	59
3.30727	55	3.30727	116	3.30727	65	3.30727	61
3.31033	54	3.31033	106	3.31033	81	3.31033	75
3.31338	61	3.31338	98	3.31338	64	3.31338	69
3.31643	63	3.31643	104	3.31643	77	3.31643	60
3.31949	70	3.31949	105	3.31949	77	3.31949	74
3.32254	47	3.32254	106	3.32254	64	3.32254	58
3.3256	56	3.3256	92	3.3256	74	3.3256	66
3.32865	53	3.32865	101	3.32865	80	3.32865	58
3.3317	58	3.3317	96	3.3317	78	3.3317	54
3.33476	65	3.33476	86	3.33476	61	3.33476	60
3.33781	60	3.33781	108	3.33781	68	3.33781	76
3.34086	43	3.34086	94	3.34086	63	3.34086	51
3.34392	38	3.34392	94	3.34392	73	3.34392	66
3.34697	53	3.34697	88	3.34697	77	3.34697	81
3.35003	48	3.35003	101	3.35003	58	3.35003	57
3.35308	59	3.35308	92	3.35308	71	3.35308	71
3.35613	48	3.35613	96	3.35613	70	3.35613	61
3.35919	47	3.35919	71	3.35919	68	3.35919	70
3.36224	48	3.36224	92	3.36224	60	3.36224	62
3.3653	50	3.3653	97	3.3653	57	3.3653	51
3.36835	57	3.36835	90	3.36835	71	3.36835	60
3.3714	56	3.3714	95	3.3714	59	3.3714	50
3.37446	52	3.37446	91	3.37446	78	3.37446	57
3.37751	51	3.37751	105	3.37751	65	3.37751	48
3.38056	47	3.38056	92	3.38056	74	3.38056	60
3.38362	52	3.38362	112	3.38362	64	3.38362	49
3.38667	51	3.38667	92	3.38667	63	3.38667	58
3.38973	60	3.38973	85	3.38973	73	3.38973	57
3.39278	52	3.39278	82	3.39278	80	3.39278	43
3.39583	44	3.39583	87	3.39583	57	3.39583	52
3.39889	59	3.39889	96	3.39889	67	3.39889	60
3.40194	44	3.40194	98	3.40194	80	3.40194	68
3.40499	63	3.40499	84	3.40499	45	3.40499	46
3.40805	58	3.40805	87	3.40805	56	3.40805	54
3.4111	60	3.4111	104	3.4111	63	3.4111	71
3.41416	53	3.41416	100	3.41416	58	3.41416	69
3.41721	71	3.41721	111	3.41721	70	3.41721	69
3.42026	40	3.42026	83	3.42026	53	3.42026	65
3.42332	48	3.42332	78	3.42332	71	3.42332	48
3.42637	54	3.42637	96	3.42637	71	3.42637	69
3.42943	43	3.42943	90	3.42943	60	3.42943	54
3.43248	59	3.43248	92	3.43248	65	3.43248	64
3.43553	42	3.43553	99	3.43553	71	3.43553	64
3.43859	56	3.43859	95	3.43859	62	3.43859	69
3.44164	69	3.44164	91	3.44164	57	3.44164	57
3.44469	59	3.44469	96	3.44469	73	3.44469	58
3.44775	58	3.44775	80	3.44775	48	3.44775	54
3.4508	47	3.4508	90	3.4508	75	3.4508	62
3.45386	44	3.45386	77	3.45386	77	3.45386	70
3.45691	57	3.45691	82	3.45691	66	3.45691	65
3.45996	52	3.45996	92	3.45996	66	3.45996	64
3.46302	56	3.46302	75	3.46302	58	3.46302	69
3.46607	45	3.46607	85	3.46607	56	3.46607	82
3.46912	45	3.46912	76	3.46912	60	3.46912	49
3.47218	56	3.47218	88	3.47218	49	3.47218	62
3.47523	52	3.47523	87	3.47523	80	3.47523	55
3.47829	47	3.47829	72	3.47829	62	3.47829	50
3.48134	42	3.48134	80	3.48134	61	3.48134	46
3.48439	33	3.48439	64	3.48439	63	3.48439	45
3.48745	61	3.48745	75	3.48745	63	3.48745	53
3.4905	53	3.4905	104	3.4905	55	3.4905	55
3.49356	49	3.49356	76	3.49356	70	3.49356	49
3.49661	46	3.49661	80	3.49661	59	3.49661	44
3.49966	45	3.49966	99	3.49966	72	3.49966	63
3.50272	46	3.50272	79	3.50272	72	3.50272	64
3.50577	61	3.50577	89	3.50577	71	3.50577	51
3.50882	43	3.50882	99	3.50882	45	3.50882	44
3.51188	42	3.51188	96	3.51188	58	3.51188	53
3.51493	58	3.51493	87	3.51493	57	3.51493	52
3.51799	39	3.51799	83	3.51799	65	3.51799	63
3.52104	48	3.52104	101	3.52104	56	3.52104	44
3.52409	57	3.52409	76	3.52409	50	3.52409	65
3.52715	56	3.52715	104	3.52715	72	3.52715	53
3.5302	49	3.5302	86	3.5302	57	3.5302	58
3.53325	50	3.53325	65	3.53325	51	3.53325	57
3.53631	51	3.53631	85	3.53631	63	3.53631	62
3.53936	48	3.53936	78	3.53936	65	3.53936	67
3.54242	43	3.54242	101	3.54242	61	3.54242	48
3.54547	44	3.54547	95	3.54547	63	3.54547	61
3.54852	45	3.54852	83	3.54852	60	3.54852	58
3.55158	42	3.55158	87	3.55158	65	3.55158	39
3.55463	48	3.55463	104	3.55463	76	3.55463	53
3.55769	39	3.55769	80	3.55769	65	3.55769	56
3.56074	50	3.56074	67	3.56074	61	3.56074	50
3.56379	51	3.56379	111	3.56379	56	3.56379	50
3.56685	43	3.56685	77	3.56685	58	3.56685	51
3.5699	40	3.5699	95	3.5699	64	3.5699	44
3.57295	53	3.57295	83	3.57295	69	3.57295	45
3.57601	37	3.57601	71	3.57601	64	3.57601	50
3.57906	45	3.57906	84	3.57906	69	3.57906	52
3.58212	40	3.58212	95	3.58212	72	3.58212	47
3.58517	51	3.58517	95	3.58517	66	3.58517	70
3.58822	41	3.58822	77	3.58822	71	3.58822	56
3.59128	42	3.59128	83	3.59128	68	3.59128	55
3.59433	51	3.59433	75	3.59433	56	3.59433	51
3.59738	52	3.59738	83	3.59738	50	3.59738	40
3.60044	49	3.60044	74	3.60044	57	3.60044	50
3.60349	54	3.60349	80	3.60349	63	3.60349	50
3.60655	52	3.60655	89	3.60655	68	3.60655	53
3.6096	45	3.6096	87	3.6096	69	3.6096	47
3.61265	42	3.61265	87	3.61265	64	3.61265	44
3.61571	28	3.61571	95	3.61571	49	3.61571	47
3.61876	59	3.61876	97	3.61876	75	3.61876	34
3.62182	39	3.62182	69	3.62182	60	3.62182	50
3.62487	42	3.62487	84	3.62487	49	3.62487	55
3.62792	54	3.62792	88	3.62792	67	3.62792	47
3.63098	49	3.63098	66	3.63098	56	3.63098	63
3.63403	40	3.63403	79	3.63403	56	3.63403	48
3.63708	40	3.63708	75	3.63708	50	3.63708	49
3.64014	44	3.64014	63	3.64014	66	3.64014	38
3.64319	39	3.64319	86	3.64319	46	3.64319	49
3.64625	46	3.64625	62	3.64625	50	3.64625	49
3.6493	43	3.6493	85	3.6493	49	3.6493	44
3.65235	39	3.65235	77	3.65235	64	3.65235	62
3.65541	57	3.65541	91	3.65541	64	3.65541	48
3.65846	50	3.65846	85	3.65846	49	3.65846	52
3.66151	47	3.66151	75	3.66151	63	3.66151	40
3.66457	51	3.66457	78	3.66457	61	3.66457	54
3.66762	54	3.66762	90	3.66762	60	3.66762	57
3.67068	41	3.67068	63	3.67068	52	3.67068	40
3.67373	50	3.67373	87	3.67373	57	3.67373	42
3.67678	35	3.67678	80	3.67678	64	3.67678	51
3.67984	55	3.67984	82	3.67984	54	3.67984	53
3.68289	54	3.68289	78	3.68289	61	3.68289	44
3.68594	41	3.68594	70	3.68594	47	3.68594	50
3.689	53	3.689	57	3.689	49	3.689	56
3.69205	37	3.69205	79	3.69205	61	3.69205	50
3.69511	57	3.69511	83	3.69511	53	3.69511	36
3.69816	37	3.69816	86	3.69816	51	3.69816	51
3.70121	48	3.70121	70	3.70121	42	3.70121	44
3.70427	51	3.70427	66	3.70427	67	3.70427	59
3.70732	42	3.70732	78	3.70732	63	3.70732	37
3.71038	41	3.71038	62	3.71038	62	3.71038	39
3.71343	46	3.71343	75	3.71343	52	3.71343	48
3.71648	42	3.71648	74	3.71648	63	3.71648	57
3.71954	46	3.71954	73	3.71954	57	3.71954	44
3.72259	45	3.72259	76	3.72259	50	3.72259	49
3.72564	45	3.72564	64	3.72564	39	3.72564	48
3.7287	57	3.7287	77	3.7287	47	3.7287	35
3.73175	32	3.73175	75	3.73175	59	3.73175	46
3.73481	39	3.73481	78	3.73481	60	3.73481	50
3.73786	39	3.73786	84	3.73786	51	3.73786	44
3.74091	42	3.74091	82	3.74091	66	3.74091	49
3.74397	46	3.74397	70	3.74397	41	3.74397	45
3.74702	31	3.74702	65	3.74702	55	3.74702	37
3.75007	38	3.75007	62	3.75007	52	3.75007	48
3.75313	42	3.75313	66	3.75313	55	3.75313	41
3.75618	53	3.75618	69	3.75618	46	3.75618	54
3.75924	40	3.75924	62	3.75924	48	3.75924	42
3.76229	38	3.76229	66	3.76229	47	3.76229	33
3.76534	62	3.76534	81	3.76534	42	3.76534	53
3.7684	32	3.7684	55	3.7684	51	3.7684	47
3.77145	52	3.77145	75	3.77145	49	3.77145	45
3.77451	42	3.77451	72	3.77451	54	3.77451	43
3.77756	47	3.77756	67	3.77756	37	3.77756	39
3.78061	47	3.78061	77	3.78061	46	3.78061	50
3.78367	51	3.78367	80	3.78367	43	3.78367	44
3.78672	43	3.78672	78	3.78672	65	3.78672	33
3.78977	43	3.78977	61	3.78977	61	3.78977	43
3.79283	38	3.79283	73	3.79283	54	3.79283	53
3.79588	39	3.79588	83	3.79588	58	3.79588	36
3.79894	46	3.79894	65	3.79894	53	3.79894	40
3.80199	40	3.80199	72	3.80199	59	3.80199	47
3.80504	33	3.80504	71	3.80504	58	3.80504	49
3.8081	36	3.8081	63	3.8081	51	3.8081	54
3.81115	41	3.81115	71	3.81115	46	3.81115	47
3.8142	38	3.8142	81	3.8142	57	3.8142	44
3.81726	39	3.81726	72	3.81726	54	3.81726	51
3.82031	36	3.82031	56	3.82031	67	3.82031	57
3.82337	51	3.82337	66	3.82337	54	3.82337	32
3.82642	49	3.82642	84	3.82642	59	3.82642	54
3.82947	41	3.82947	60	3.82947	60	3.82947	45
3.83253	40	3.83253	81	3.83253	68	3.83253	44
3.83558	43	3.83558	71	3.83558	59	3.83558	46
3.83864	37	3.83864	57	3.83864	50	3.83864	49
3.84169	34	3.84169	77	3.84169	40	3.84169	44
3.84474	47	3.84474	66	3.84474	60	3.84474	57
3.8478	36	3.8478	71	3.8478	42	3.8478	35
3.85085	38	3.85085	72	3.85085	45	3.85085	43
3.8539	44	3.8539	67	3.8539	53	3.8539	38
3.85696	50	3.85696	87	3.85696	63	3.85696	40
3.86001	34	3.86001	73	3.86001	49	3.86001	38
3.86307	33	3.86307	81	3.86307	46	3.86307	44
3.86612	37	3.86612	65	3.86612	45	3.86612	46
3.86917	32	3.86917	76	3.86917	56	3.86917	45
3.87223	44	3.87223	67	3.87223	58	3.87223	39
3.87528	47	3.87528	77	3.87528	38	3.87528	45
3.87833	42	3.87833	59	3.87833	53	3.87833	44
3.88139	41	3.88139	62	3.88139	55	3.88139	39
3.88444	33	3.88444	75	3.88444	41	3.88444	46
3.8875	45	3.8875	73	3.8875	55	3.8875	53
3.89055	37	3.89055	59	3.89055	45	3.89055	41
3.8936	37	3.8936	57	3.8936	48	3.8936	43
3.89666	49	3.89666	81	3.89666	72	3.89666	57
3.89971	38	3.89971	74	3.89971	45	3.89971	45
3.90277	41	3.90277	71	3.90277	37	3.90277	45
3.90582	40	3.90582	64	3.90582	39	3.90582	46
3.90887	35	3.90887	65	3.90887	40	3.90887	50
3.91193	55	3.91193	68	3.91193	53	3.91193	45
3.91498	36	3.91498	63	3.91498	63	3.91498	47
3.91803	40	3.91803	74	3.91803	54	3.91803	52
3.92109	38	3.92109	72	3.92109	45	3.92109	33
3.92414	31	3.92414	63	3.92414	36	3.92414	35
3.9272	37	3.9272	69	3.9272	49	3.9272	52
3.93025	51	3.93025	89	3.93025	40	3.93025	42
3.9333	40	3.9333	74	3.9333	49	3.9333	41
3.93636	42	3.93636	71	3.93636	47	3.93636	37
3.93941	32	3.93941	60	3.93941	39	3.93941	56
3.94246	39	3.94246	72	3.94246	57	3.94246	48
3.94552	27	3.94552	68	3.94552	47	3.94552	39
3.94857	57	3.94857	56	3.94857	35	3.94857	36
3.95163	42	3.95163	76	3.95163	44	3.95163	37
3.95468	43	3.95468	88	3.95468	40	3.95468	35
3.95773	42	3.95773	73	3.95773	44	3.95773	29
3.96079	41	3.96079	68	3.96079	48	3.96079	44
3.96384	41	3.96384	91	3.96384	57	3.96384	32
3.9669	43	3.9669	62	3.9669	47	3.9669	51
3.96995	30	3.96995	67	3.96995	50	3.96995	36
3.973	45	3.973	61	3.973	49	3.973	31
3.97606	44	3.97606	70	3.97606	53	3.97606	33
3.97911	45	3.97911	62	3.97911	53	3.97911	32
3.98216	32	3.98216	69	3.98216	48	3.98216	39
3.98522	28	3.98522	53	3.98522	49	3.98522	40
3.98827	28	3.98827	57	3.98827	67	3.98827	40
3.99133	34	3.99133	66	3.99133	39	3.99133	46
3.99438	36	3.99438	56	3.99438	48	3.99438	46
3.99743	31	3.99743	63	3.99743	41	3.99743	36
4.00049	37	4.00049	71	4.00049	49	4.00049	36
4.00354	28	4.00354	61	4.00354	30	4.00354	38
4.00659	37	4.00659	64	4.00659	55	4.00659	43
4.00965	37	4.00965	67	4.00965	47	4.00965	35
4.0127	34	4.0127	70	4.0127	42	4.0127	37
4.01576	34	4.01576	59	4.01576	47	4.01576	35
4.01881	33	4.01881	66	4.01881	41	4.01881	41
4.02186	42	4.02186	64	4.02186	61	4.02186	44
4.02492	33	4.02492	71	4.02492	42	4.02492	34
4.02797	43	4.02797	57	4.02797	41	4.02797	50
4.03103	34	4.03103	57	4.03103	44	4.03103	38
4.03408	41	4.03408	55	4.03408	41	4.03408	41
4.03713	47	4.03713	67	4.03713	56	4.03713	45
4.04019	33	4.04019	72	4.04019	59	4.04019	38
4.04324	38	4.04324	78	4.04324	46	4.04324	38
4.04629	32	4.04629	78	4.04629	47	4.04629	39
4.04935	28	4.04935	59	4.04935	39	4.04935	37
4.0524	43	4.0524	64	4.0524	46	4.0524	35
4.05546	40	4.05546	73	4.05546	39	4.05546	35
4.05851	36	4.05851	67	4.05851	45	4.05851	45
4.06156	38	4.06156	59	4.06156	55	4.06156	43
4.06462	40	4.06462	67	4.06462	48	4.06462	32
4.06767	49	4.06767	86	4.06767	31	4.06767	34
4.07072	38	4.07072	64	4.07072	51	4.07072	45
4.07378	42	4.07378	67	4.07378	40	4.07378	34
4.07683	45	4.07683	59	4.07683	53	4.07683	44
4.07989	46	4.07989	53	4.07989	50	4.07989	35
4.08294	35	4.08294	53	4.08294	36	4.08294	33
4.08599	33	4.08599	63	4.08599	63	4.08599	36
4.08905	27	4.08905	61	4.08905	41	4.08905	44
4.0921	50	4.0921	74	4.0921	48	4.0921	38
4.09516	39	4.09516	55	4.09516	46	4.09516	41
4.09821	45	4.09821	79	4.09821	48	4.09821	35
4.10126	33	4.10126	62	4.10126	50	4.10126	41
4.10432	31	4.10432	55	4.10432	46	4.10432	40
4.10737	32	4.10737	66	4.10737	43	4.10737	47
4.11042	39	4.11042	70	4.11042	36	4.11042	37
4.11348	35	4.11348	55	4.11348	53	4.11348	34
4.11653	33	4.11653	57	4.11653	50	4.11653	36
4.11959	35	4.11959	65	4.11959	45	4.11959	50
4.12264	40	4.12264	61	4.12264	53	4.12264	30
4.12569	31	4.12569	64	4.12569	54	4.12569	39
4.12875	34	4.12875	69	4.12875	40	4.12875	38
4.1318	33	4.1318	70	4.1318	45	4.1318	28
4.13485	36	4.13485	63	4.13485	43	4.13485	38
4.13791	61	4.13791	56	4.13791	48	4.13791	40
4.14096	34	4.14096	67	4.14096	54	4.14096	40
4.14402	35	4.14402	70	4.14402	42	4.14402	33
4.14707	33	4.14707	58	4.14707	46	4.14707	31
4.15012	33	4.15012	68	4.15012	44	4.15012	33
4.15318	35	4.15318	56	4.15318	42	4.15318	41
4.15623	28	4.15623	57	4.15623	50	4.15623	33
4.15929	41	4.15929	54	4.15929	36	4.15929	36
4.16234	33	4.16234	58	4.16234	43	4.16234	39
4.16539	41	4.16539	64	4.16539	27	4.16539	36
4.16845	28	4.16845	63	4.16845	45	4.16845	44
4.1715	32	4.1715	60	4.1715	51	4.1715	32
4.17455	33	4.17455	60	4.17455	54	4.17455	43
4.17761	46	4.17761	62	4.17761	34	4.17761	37
4.18066	34	4.18066	57	4.18066	50	4.18066	30
4.18372	37	4.18372	68	4.18372	43	4.18372	36
4.18677	32	4.18677	57	4.18677	54	4.18677	38
4.18982	30	4.18982	70	4.18982	42	4.18982	32
4.19288	29	4.19288	55	4.19288	36	4.19288	36
4.19593	43	4.19593	67	4.19593	48	4.19593	38
4.19898	33	4.19898	62	4.19898	42	4.19898	48
4.20204	28	4.20204	49	4.20204	49	4.20204	41
4.20509	36	4.20509	67	4.20509	38	4.20509	28
4.20815	24	4.20815	68	4.20815	41	4.20815	43
4.2112	25	4.2112	68	4.2112	37	4.2112	34
4.21425	28	4.21425	56	4.21425	40	4.21425	36
4.21731	35	4.21731	55	4.21731	61	4.21731	29
4.22036	36	4.22036	64	4.22036	41	4.22036	28
4.22342	40	4.22342	59	4.22342	43	4.22342	34
4.22647	30	4.22647	57	4.22647	33	4.22647	35
4.22952	21	4.22952	51	4.22952	43	4.22952	27
4.23258	30	4.23258	57	4.23258	42	4.23258	28
4.23563	32	4.23563	55	4.23563	42	4.23563	46
4.23868	33	4.23868	52	4.23868	40	4.23868	38
4.24174	42	4.24174	66	4.24174	39	4.24174	36
4.24479	49	4.24479	75	4.24479	40	4.24479	38
4.24785	39	4.24785	53	4.24785	40	4.24785	29
4.2509	31	4.2509	55	4.2509	40	4.2509	29
4.25395	25	4.25395	76	4.25395	42	4.25395	33
4.25701	31	4.25701	48	4.25701	45	4.25701	43
4.26006	35	4.26006	62	4.26006	41	4.26006	29
4.26311	36	4.26311	55	4.26311	33	4.26311	38
4.26617	31	4.26617	66	4.26617	35	4.26617	31
4.26922	41	4.26922	50	4.26922	40	4.26922	31
4.27228	34	4.27228	58	4.27228	44	4.27228	35
4.27533	28	4.27533	60	4.27533	51	4.27533	43
4.27838	33	4.27838	60	4.27838	44	4.27838	45
4.28144	21	4.28144	66	4.28144	60	4.28144	46
4.28449	38	4.28449	56	4.28449	32	4.28449	26
4.28754	43	4.28754	57	4.28754	42	4.28754	27
4.2906	32	4.2906	55	4.2906	39	4.2906	33
4.29365	45	4.29365	55	4.29365	45	4.29365	30
4.29671	33	4.29671	52	4.29671	59	4.29671	30
4.29976	31	4.29976	70	4.29976	41	4.29976	31
4.30281	27	4.30281	57	4.30281	50	4.30281	51
4.30587	25	4.30587	56	4.30587	43	4.30587	29
4.30892	27	4.30892	62	4.30892	37	4.30892	46
4.31198	37	4.31198	52	4.31198	47	4.31198	28
4.31503	33	4.31503	49	4.31503	40	4.31503	29
4.31808	34	4.31808	61	4.31808	33	4.31808	37
4.32114	34	4.32114	44	4.32114	32	4.32114	49
4.32419	38	4.32419	61	4.32419	40	4.32419	26
4.32724	36	4.32724	44	4.32724	45	4.32724	37
4.3303	38	4.3303	67	4.3303	35	4.3303	33
4.33335	36	4.33335	66	4.33335	39	4.33335	46
4.33641	39	4.33641	60	4.33641	35	4.33641	38
4.33946	24	4.33946	58	4.33946	44	4.33946	37
4.34251	32	4.34251	67	4.34251	42	4.34251	30
4.34557	30	4.34557	51	4.34557	46	4.34557	40
4.34862	33	4.34862	40	4.34862	38	4.34862	33
4.35167	25	4.35167	58	4.35167	37	4.35167	32
4.35473	38	4.35473	50	4.35473	36	4.35473	34
4.35778	23	4.35778	51	4.35778	38	4.35778	22
4.36084	31	4.36084	49	4.36084	49	4.36084	34
4.36389	30	4.36389	50	4.36389	41	4.36389	34
4.36694	43	4.36694	48	4.36694	51	4.36694	40
4.37	28	4.37	56	4.37	37	4.37	41
4.37305	36	4.37305	45	4.37305	44	4.37305	35
4.37611	36	4.37611	65	4.37611	30	4.37611	39
4.37916	34	4.37916	56	4.37916	30	4.37916	27
4.38221	27	4.38221	44	4.38221	44	4.38221	29
4.38527	35	4.38527	58	4.38527	41	4.38527	35
4.38832	27	4.38832	54	4.38832	30	4.38832	31
4.39137	29	4.39137	49	4.39137	41	4.39137	38
4.39443	41	4.39443	48	4.39443	37	4.39443	35
4.39748	24	4.39748	68	4.39748	33	4.39748	39
4.40054	24	4.40054	67	4.40054	45	4.40054	29
4.40359	31	4.40359	42	4.40359	41	4.40359	39
4.40664	42	4.40664	43	4.40664	33	4.40664	33
4.4097	27	4.4097	47	4.4097	33	4.4097	34
4.41275	26	4.41275	48	4.41275	29	4.41275	30
4.4158	33	4.4158	39	4.4158	39	4.4158	43
4.41886	19	4.41886	67	4.41886	43	4.41886	40
4.42191	25	4.42191	52	4.42191	36	4.42191	26
4.42497	34	4.42497	64	4.42497	49	4.42497	36
4.42802	25	4.42802	52	4.42802	51	4.42802	33
4.43107	36	4.43107	58	4.43107	40	4.43107	37
4.43413	31	4.43413	42	4.43413	42	4.43413	32
4.43718	32	4.43718	49	4.43718	41	4.43718	32
4.44024	21	4.44024	66	4.44024	48	4.44024	34
4.44329	31	4.44329	59	4.44329	35	4.44329	40
4.44634	24	4.44634	58	4.44634	37	4.44634	32
4.4494	39	4.4494	60	4.4494	44	4.4494	39
4.45245	31	4.45245	44	4.45245	28	4.45245	27
4.4555	30	4.4555	52	4.4555	34	4.4555	33
4.45856	33	4.45856	47	4.45856	44	4.45856	31
4.46161	32	4.46161	48	4.46161	45	4.46161	38
4.46467	27	4.46467	46	4.46467	46	4.46467	37
4.46772	32	4.46772	50	4.46772	41	4.46772	32
4.47077	28	4.47077	49	4.47077	41	4.47077	33
4.47383	40	4.47383	67	4.47383	52	4.47383	38
4.47688	21	4.47688	55	4.47688	42	4.47688	28
4.47993	33	4.47993	43	4.47993	39	4.47993	20
4.48299	25	4.48299	54	4.48299	30	4.48299	21
4.48604	24	4.48604	48	4.48604	50	4.48604	30
4.4891	34	4.4891	47	4.4891	53	4.4891	37
4.49215	39	4.49215	56	4.49215	48	4.49215	27
4.4952	33	4.4952	47	4.4952	48	4.4952	30
4.49826	27	4.49826	57	4.49826	43	4.49826	34
4.50131	31	4.50131	44	4.50131	40	4.50131	44
4.50437	37	4.50437	58	4.50437	43	4.50437	31
4.50742	39	4.50742	57	4.50742	32	4.50742	21
4.51047	33	4.51047	54	4.51047	55	4.51047	33
4.51353	33	4.51353	45	4.51353	40	4.51353	42
4.51658	25	4.51658	55	4.51658	41	4.51658	22
4.51963	28	4.51963	54	4.51963	37	4.51963	31
4.52269	28	4.52269	43	4.52269	39	4.52269	22
4.52574	24	4.52574	45	4.52574	32	4.52574	29
4.5288	37	4.5288	52	4.5288	49	4.5288	26
4.53185	30	4.53185	49	4.53185	43	4.53185	33
4.5349	27	4.5349	49	4.5349	36	4.5349	38
4.53796	25	4.53796	45	4.53796	31	4.53796	22
4.54101	14	4.54101	64	4.54101	39	4.54101	35
4.54406	39	4.54406	48	4.54406	39	4.54406	29
4.54712	33	4.54712	43	4.54712	48	4.54712	43
4.55017	26	4.55017	51	4.55017	33	4.55017	32
4.55323	27	4.55323	47	4.55323	39	4.55323	36
4.55628	33	4.55628	45	4.55628	32	4.55628	16
4.55933	28	4.55933	60	4.55933	27	4.55933	27
4.56239	22	4.56239	50	4.56239	33	4.56239	30
4.56544	24	4.56544	56	4.56544	42	4.56544	28
4.5685	23	4.5685	60	4.5685	31	4.5685	30
4.57155	22	4.57155	46	4.57155	36	4.57155	26
4.5746	37	4.5746	49	4.5746	47	4.5746	38
4.57766	33	4.57766	65	4.57766	41	4.57766	20
4.58071	34	4.58071	53	4.58071	44	4.58071	44
4.58376	28	4.58376	49	4.58376	41	4.58376	25
4.58682	31	4.58682	51	4.58682	34	4.58682	45
4.58987	20	4.58987	44	4.58987	36	4.58987	36
4.59293	23	4.59293	41	4.59293	39	4.59293	36
4.59598	21	4.59598	47	4.59598	31	4.59598	23
4.59903	29	4.59903	46	4.59903	37	4.59903	19
4.60209	35	4.60209	52	4.60209	39	4.60209	34
4.60514	28	4.60514	43	4.60514	33	4.60514	28
4.60819	14	4.60819	59	4.60819	24	4.60819	25
4.61125	19	4.61125	45	4.61125	29	4.61125	24
4.6143	27	4.6143	53	4.6143	41	4.6143	28
4.61736	24	4.61736	35	4.61736	36	4.61736	25
4.62041	36	4.62041	49	4.62041	41	4.62041	33
4.62346	24	4.62346	45	4.62346	41	4.62346	24
4.62652	21	4.62652	48	4.62652	47	4.62652	32
4.62957	30	4.62957	29	4.62957	35	4.62957	31
4.63263	27	4.63263	44	4.63263	44	4.63263	24
4.63568	28	4.63568	43	4.63568	33	4.63568	28
4.63873	23	4.63873	40	4.63873	40	4.63873	34
4.64179	36	4.64179	44	4.64179	37	4.64179	22
4.64484	26	4.64484	62	4.64484	29	4.64484	31
4.64789	28	4.64789	49	4.64789	52	4.64789	33
4.65095	28	4.65095	48	4.65095	28	4.65095	31
4.654	26	4.654	40	4.654	43	4.654	38
4.65706	32	4.65706	43	4.65706	39	4.65706	27
4.66011	31	4.66011	32	4.66011	43	4.66011	31
4.66316	29	4.66316	57	4.66316	27	4.66316	25
4.66622	29	4.66622	55	4.66622	37	4.66622	18
4.66927	28	4.66927	34	4.66927	38	4.66927	30
4.67232	28	4.67232	40	4.67232	43	4.67232	27
4.67538	18	4.67538	43	4.67538	36	4.67538	25
4.67843	29	4.67843	42	4.67843	38	4.67843	33
4.68149	30	4.68149	38	4.68149	37	4.68149	30
4.68454	22	4.68454	48	4.68454	47	4.68454	34
4.68759	16	4.68759	41	4.68759	43	4.68759	28
4.69065	28	4.69065	42	4.69065	30	4.69065	21
4.6937	27	4.6937	40	4.6937	41	4.6937	28
4.69676	35	4.69676	43	4.69676	36	4.69676	28
4.69981	22	4.69981	40	4.69981	28	4.69981	22
4.70286	30	4.70286	52	4.70286	30	4.70286	35
4.70592	25	4.70592	52	4.70592	33	4.70592	36
4.70897	28	4.70897	46	4.70897	46	4.70897	29
4.71202	23	4.71202	33	4.71202	32	4.71202	18
4.71508	32	4.71508	46	4.71508	26	4.71508	22
4.71813	18	4.71813	59	4.71813	29	4.71813	34
4.72119	24	4.72119	46	4.72119	38	4.72119	34
4.72424	27	4.72424	43	4.72424	35	4.72424	22
4.72729	19	4.72729	46	4.72729	37	4.72729	28
4.73035	21	4.73035	48	4.73035	41	4.73035	27
4.7334	22	4.7334	49	4.7334	31	4.7334	27
4.73645	37	4.73645	47	4.73645	37	4.73645	33
4.73951	26	4.73951	51	4.73951	36	4.73951	24
4.74256	29	4.74256	37	4.74256	38	4.74256	27
4.74562	22	4.74562	37	4.74562	28	4.74562	27
4.74867	26	4.74867	57	4.74867	48	4.74867	25
4.75172	28	4.75172	56	4.75172	46	4.75172	33
4.75478	20	4.75478	48	4.75478	46	4.75478	38
4.75783	29	4.75783	53	4.75783	37	4.75783	24
4.76089	28	4.76089	48	4.76089	40	4.76089	25
4.76394	25	4.76394	39	4.76394	25	4.76394	19
4.76699	26	4.76699	45	4.76699	49	4.76699	22
4.77005	23	4.77005	34	4.77005	25	4.77005	18
4.7731	25	4.7731	44	4.7731	40	4.7731	38
4.77615	29	4.77615	42	4.77615	30	4.77615	28
4.77921	34	4.77921	49	4.77921	34	4.77921	25
4.78226	28	4.78226	56	4.78226	38	4.78226	31
4.78532	24	4.78532	41	4.78532	38	4.78532	27
4.78837	25	4.78837	49	4.78837	41	4.78837	32
4.79142	26	4.79142	51	4.79142	45	4.79142	24
4.79448	23	4.79448	40	4.79448	48	4.79448	25
4.79753	25	4.79753	35	4.79753	32	4.79753	29
4.80058	29	4.80058	49	4.80058	32	4.80058	31
4.80364	26	4.80364	65	4.80364	42	4.80364	27
4.80669	28	4.80669	45	4.80669	35	4.80669	30
4.80975	31	4.80975	58	4.80975	28	4.80975	22
4.8128	22	4.8128	44	4.8128	31	4.8128	23
4.81585	24	4.81585	43	4.81585	28	4.81585	28
4.81891	30	4.81891	47	4.81891	35	4.81891	28
4.82196	24	4.82196	46	4.82196	38	4.82196	28
4.82501	25	4.82501	45	4.82501	44	4.82501	23
4.82807	30	4.82807	40	4.82807	35	4.82807	28
4.83112	39	4.83112	45	4.83112	45	4.83112	23
4.83418	27	4.83418	63	4.83418	35	4.83418	24
4.83723	30	4.83723	46	4.83723	36	4.83723	31
4.84028	23	4.84028	48	4.84028	44	4.84028	23
4.84334	13	4.84334	41	4.84334	40	4.84334	28
4.84639	25	4.84639	44	4.84639	29	4.84639	33
4.84945	30	4.84945	42	4.84945	35	4.84945	19
4.8525	26	4.8525	42	4.8525	34	4.8525	26
4.85555	22	4.85555	42	4.85555	39	4.85555	29
4.85861	28	4.85861	50	4.85861	40	4.85861	31
4.86166	33	4.86166	44	4.86166	35	4.86166	30
4.86471	33	4.86471	45	4.86471	32	4.86471	19
4.86777	21	4.86777	49	4.86777	35	4.86777	26
4.87082	25	4.87082	40	4.87082	35	4.87082	14
4.87388	30	4.87388	38	4.87388	40	4.87388	29
4.87693	38	4.87693	42	4.87693	40	4.87693	33
4.87998	27	4.87998	50	4.87998	35	4.87998	24
4.88304	25	4.88304	53	4.88304	39	4.88304	32
4.88609	25	4.88609	54	4.88609	31	4.88609	30
4.88914	17	4.88914	48	4.88914	27	4.88914	29
4.8922	18	4.8922	48	4.8922	36	4.8922	26
4.89525	31	4.89525	49	4.89525	31	4.89525	29
4.89831	24	4.89831	34	4.89831	25	4.89831	26
4.90136	28	4.90136	39	4.90136	34	4.90136	30
4.90441	26	4.90441	38	4.90441	36	4.90441	28
4.90747	28	4.90747	43	4.90747	25	4.90747	23
4.91052	23	4.91052	50	4.91052	35	4.91052	38
4.91358	23	4.91358	41	4.91358	27	4.91358	27
4.91663	24	4.91663	44	4.91663	34	4.91663	30
4.91968	27	4.91968	37	4.91968	33	4.91968	25
4.92274	23	4.92274	35	4.92274	26	4.92274	30
4.92579	23	4.92579	47	4.92579	28	4.92579	23
4.92884	34	4.92884	42	4.92884	29	4.92884	28
4.9319	17	4.9319	43	4.9319	43	4.9319	28
4.93495	23	4.93495	44	4.93495	35	4.93495	26
4.93801	26	4.93801	39	4.93801	24	4.93801	22
4.94106	26	4.94106	42	4.94106	38	4.94106	23
4.94411	17	4.94411	38	4.94411	26	4.94411	16
4.94717	22	4.94717	34	4.94717	30	4.94717	18
4.95022	19	4.95022	40	4.95022	37	4.95022	31
4.95327	30	4.95327	42	4.95327	34	4.95327	32
4.95633	18	4.95633	40	4.95633	33	4.95633	19
4.95938	35	4.95938	46	4.95938	25	4.95938	26
4.96244	15	4.96244	41	4.96244	39	4.96244	22
4.96549	24	4.96549	36	4.96549	32	4.96549	24
4.96854	30	4.96854	49	4.96854	28	4.96854	26
4.9716	35	4.9716	38	4.9716	27	4.9716	27
4.97465	33	4.97465	46	4.97465	23	4.97465	21
4.97771	25	4.97771	53	4.97771	34	4.97771	31
4.98076	24	4.98076	37	4.98076	23	4.98076	29
4.98381	24	4.98381	43	4.98381	25	4.98381	22
4.98687	19	4.98687	34	4.98687	27	4.98687	25
4.98992	18	4.98992	46	4.98992	37	4.98992	21
4.99297	19	4.99297	37	4.99297	35	4.99297	23
4.99603	34	4.99603	44	4.99603	31	4.99603	18
4.99908	25	4.99908	35	4.99908	36	4.99908	23
5.00214	28	5.00214	38	5.00214	30	5.00214	23
5.00519	33	5.00519	38	5.00519	34	5.00519	27
5.00824	31	5.00824	31	5.00824	25	5.00824	18
5.0113	24	5.0113	34	5.0113	38	5.0113	26
5.01435	28	5.01435	46	5.01435	28	5.01435	28
5.0174	25	5.0174	33	5.0174	31	5.0174	29
5.02046	19	5.02046	32	5.02046	32	5.02046	28
5.02351	30	5.02351	44	5.02351	35	5.02351	36
5.02657	32	5.02657	46	5.02657	40	5.02657	35
5.02962	15	5.02962	54	5.02962	34	5.02962	24
5.03267	17	5.03267	41	5.03267	38	5.03267	25
5.03573	21	5.03573	38	5.03573	28	5.03573	30
5.03878	25	5.03878	46	5.03878	38	5.03878	23
5.04184	25	5.04184	53	5.04184	34	5.04184	18
5.04489	25	5.04489	38	5.04489	32	5.04489	26
5.04794	21	5.04794	48	5.04794	40	5.04794	28
5.051	25	5.051	38	5.051	27	5.051	26
5.05405	22	5.05405	41	5.05405	32	5.05405	30
5.0571	27	5.0571	50	5.0571	43	5.0571	28
5.06016	17	5.06016	32	5.06016	33	5.06016	22
5.06321	28	5.06321	39	5.06321	36	5.06321	18
5.06627	23	5.06627	37	5.06627	45	5.06627	32
5.06932	24	5.06932	41	5.06932	31	5.06932	21
5.07237	22	5.07237	46	5.07237	43	5.07237	30
5.07543	30	5.07543	45	5.07543	39	5.07543	29
5.07848	30	5.07848	47	5.07848	36	5.07848	19
5.08153	18	5.08153	35	5.08153	25	5.08153	25
5.08459	20	5.08459	33	5.08459	32	5.08459	27
5.08764	26	5.08764	46	5.08764	38	5.08764	20
5.0907	28	5.0907	40	5.0907	29	5.0907	30
5.09375	18	5.09375	36	5.09375	24	5.09375	23
5.0968	15	5.0968	52	5.0968	31	5.0968	28
5.09986	32	5.09986	38	5.09986	31	5.09986	31
5.10291	24	5.10291	37	5.10291	27	5.10291	23
5.10597	20	5.10597	48	5.10597	39	5.10597	24
5.10902	20	5.10902	35	5.10902	27	5.10902	21
5.11207	20	5.11207	48	5.11207	37	5.11207	26
5.11513	20	5.11513	34	5.11513	25	5.11513	21
5.11818	21	5.11818	51	5.11818	36	5.11818	21
5.12123	20	5.12123	40	5.12123	22	5.12123	26
5.12429	16	5.12429	40	5.12429	35	5.12429	26
5.12734	31	5.12734	36	5.12734	28	5.12734	23
5.1304	26	5.1304	47	5.1304	33	5.1304	27
5.13345	29	5.13345	35	5.13345	30	5.13345	20
5.1365	25	5.1365	34	5.1365	25	5.1365	23
5.13956	24	5.13956	33	5.13956	38	5.13956	24
5.14261	27	5.14261	37	5.14261	28	5.14261	21
5.14566	21	5.14566	34	5.14566	35	5.14566	23
5.14872	23	5.14872	48	5.14872	36	5.14872	22
5.15177	23	5.15177	36	5.15177	27	5.15177	25
5.15483	21	5.15483	34	5.15483	36	5.15483	23
5.15788	15	5.15788	43	5.15788	28	5.15788	31
5.16093	17	5.16093	36	5.16093	25	5.16093	37
5.16399	24	5.16399	27	5.16399	27	5.16399	28
5.16704	23	5.16704	35	5.16704	31	5.16704	29
5.1701	23	5.1701	40	5.1701	33	5.1701	23
5.17315	17	5.17315	31	5.17315	41	5.17315	15
5.1762	27	5.1762	37	5.1762	33	5.1762	22
5.17926	21	5.17926	37	5.17926	37	5.17926	18
5.18231	29	5.18231	34	5.18231	30	5.18231	19
5.18536	13	5.18536	44	5.18536	33	5.18536	33
5.18842	17	5.18842	33	5.18842	28	5.18842	30
5.19147	30	5.19147	47	5.19147	25	5.19147	33
5.19453	18	5.19453	41	5.19453	22	5.19453	22
5.19758	21	5.19758	45	5.19758	27	5.19758	23
5.20063	22	5.20063	36	5.20063	32	5.20063	21
5.20369	20	5.20369	35	5.20369	31	5.20369	20
5.20674	20	5.20674	42	5.20674	31	5.20674	28
5.20979	28	5.20979	43	5.20979	46	5.20979	18
5.21285	28	5.21285	36	5.21285	33	5.21285	22
5.2159	22	5.2159	36	5.2159	25	5.2159	24
5.21896	22	5.21896	44	5.21896	25	5.21896	23
5.22201	40	5.22201	46	5.22201	35	5.22201	30
5.22506	29	5.22506	30	5.22506	28	5.22506	23
5.22812	19	5.22812	44	5.22812	32	5.22812	20
5.23117	20	5.23117	48	5.23117	38	5.23117	25
5.23423	23	5.23423	48	5.23423	33	5.23423	23
5.23728	15	5.23728	34	5.23728	30	5.23728	20
5.24033	20	5.24033	31	5.24033	32	5.24033	26
5.24339	27	5.24339	33	5.24339	32	5.24339	26
5.24644	29	5.24644	42	5.24644	31	5.24644	24
5.24949	24	5.24949	47	5.24949	25	5.24949	32
5.25255	26	5.25255	36	5.25255	32	5.25255	21
5.2556	21	5.2556	50	5.2556	31	5.2556	22
5.25866	17	5.25866	32	5.25866	25	5.25866	22
5.26171	18	5.26171	32	5.26171	33	5.26171	27
5.26476	27	5.26476	38	5.26476	30	5.26476	30
5.26782	14	5.26782	36	5.26782	26	5.26782	28
5.27087	20	5.27087	40	5.27087	32	5.27087	21
5.27392	19	5.27392	44	5.27392	23	5.27392	20
5.27698	20	5.27698	33	5.27698	21	5.27698	25
5.28003	26	5.28003	48	5.28003	31	5.28003	19
5.28309	26	5.28309	36	5.28309	31	5.28309	28
5.28614	21	5.28614	36	5.28614	26	5.28614	19
5.28919	24	5.28919	44	5.28919	27	5.28919	21
5.29225	28	5.29225	33	5.29225	34	5.29225	23
5.2953	15	5.2953	37	5.2953	34	5.2953	24
5.29836	15	5.29836	36	5.29836	41	5.29836	30
5.30141	14	5.30141	35	5.30141	27	5.30141	23
5.30446	12	5.30446	41	5.30446	24	5.30446	29
5.30752	14	5.30752	36	5.30752	34	5.30752	14
5.31057	32	5.31057	36	5.31057	22	5.31057	25
5.31362	29	5.31362	36	5.31362	31	5.31362	25
5.31668	21	5.31668	34	5.31668	22	5.31668	18
5.31973	33	5.31973	35	5.31973	30	5.31973	17
5.32279	17	5.32279	37	5.32279	27	5.32279	31
5.32584	23	5.32584	37	5.32584	32	5.32584	27
5.32889	17	5.32889	37	5.32889	34	5.32889	22
5.33195	20	5.33195	35	5.33195	39	5.33195	20
5.335	18	5.335	44	5.335	31	5.335	19
5.33805	16	5.33805	35	5.33805	22	5.33805	23
5.34111	26	5.34111	25	5.34111	33	5.34111	25
5.34416	22	5.34416	33	5.34416	25	5.34416	24
5.34722	25	5.34722	31	5.34722	27	5.34722	24
5.35027	26	5.35027	40	5.35027	30	5.35027	15
5.35332	24	5.35332	36	5.35332	31	5.35332	18
5.35638	18	5.35638	36	5.35638	30	5.35638	22
5.35943	21	5.35943	39	5.35943	29	5.35943	16
5.36249	26	5.36249	38	5.36249	26	5.36249	26
5.36554	23	5.36554	39	5.36554	27	5.36554	21
5.36859	16	5.36859	34	5.36859	31	5.36859	29
5.37165	22	5.37165	34	5.37165	30	5.37165	19
5.3747	23	5.3747	39	5.3747	37	5.3747	30
5.37775	25	5.37775	38	5.37775	28	5.37775	22
5.38081	24	5.38081	35	5.38081	27	5.38081	18
5.38386	25	5.38386	40	5.38386	28	5.38386	25
5.38692	26	5.38692	42	5.38692	22	5.38692	30
5.38997	29	5.38997	30	5.38997	28	5.38997	24
5.39302	22	5.39302	29	5.39302	32	5.39302	25
5.39608	19	5.39608	39	5.39608	40	5.39608	32
5.39913	18	5.39913	33	5.39913	35	5.39913	27
5.40218	22	5.40218	30	5.40218	38	5.40218	24
5.40524	24	5.40524	34	5.40524	21	5.40524	22
5.40829	26	5.40829	29	5.40829	29	5.40829	26
5.41135	18	5.41135	41	5.41135	26	5.41135	28
5.4144	34	5.4144	27	5.4144	26	5.4144	19
5.41745	22	5.41745	38	5.41745	30	5.41745	29
5.42051	20	5.42051	36	5.42051	25	5.42051	23
5.42356	18	5.42356	25	5.42356	30	5.42356	15
5.42661	25	5.42661	44	5.42661	33	5.42661	22
5.42967	17	5.42967	34	5.42967	38	5.42967	27
5.43272	20	5.43272	40	5.43272	22	5.43272	24
5.43578	15	5.43578	41	5.43578	22	5.43578	14
5.43883	21	5.43883	27	5.43883	30	5.43883	19
5.44188	18	5.44188	28	5.44188	32	5.44188	26
5.44494	24	5.44494	38	5.44494	27	5.44494	24
5.44799	28	5.44799	32	5.44799	19	5.44799	12
5.45105	21	5.45105	32	5.45105	21	5.45105	25
5.4541	20	5.4541	38	5.4541	37	5.4541	24
5.45715	23	5.45715	31	5.45715	29	5.45715	25
5.46021	18	5.46021	48	5.46021	22	5.46021	24
5.46326	11	5.46326	35	5.46326	30	5.46326	21
5.46631	21	5.46631	36	5.46631	23	5.46631	27
5.46937	11	5.46937	36	5.46937	25	5.46937	27
5.47242	25	5.47242	51	5.47242	35	5.47242	18
5.47548	14	5.47548	30	5.47548	29	5.47548	25
5.47853	29	5.47853	36	5.47853	27	5.47853	20
5.48158	20	5.48158	26	5.48158	23	5.48158	25
5.48464	17	5.48464	35	5.48464	27	5.48464	32
5.48769	17	5.48769	36	5.48769	25	5.48769	25
5.49074	19	5.49074	44	5.49074	23	5.49074	17
5.4938	14	5.4938	48	5.4938	27	5.4938	21
5.49685	27	5.49685	39	5.49685	20	5.49685	16
5.49991	24	5.49991	39	5.49991	33	5.49991	21
5.50296	21	5.50296	37	5.50296	22	5.50296	25
5.50601	18	5.50601	37	5.50601	24	5.50601	23
5.50907	15	5.50907	43	5.50907	30	5.50907	27
5.51212	21	5.51212	37	5.51212	20	5.51212	16
5.51518	18	5.51518	43	5.51518	36	5.51518	23
5.51823	25	5.51823	37	5.51823	23	5.51823	18
5.52128	15	5.52128	37	5.52128	33	5.52128	16
5.52434	20	5.52434	28	5.52434	28	5.52434	18
5.52739	24	5.52739	41	5.52739	30	5.52739	26
5.53044	16	5.53044	34	5.53044	20	5.53044	24
5.5335	15	5.5335	36	5.5335	39	5.5335	26
5.53655	19	5.53655	45	5.53655	32	5.53655	22
5.53961	22	5.53961	30	5.53961	31	5.53961	19
5.54266	20	5.54266	25	5.54266	22	5.54266	16
5.54571	18	5.54571	34	5.54571	26	5.54571	26
5.54877	19	5.54877	33	5.54877	20	5.54877	17
5.55182	22	5.55182	37	5.55182	27	5.55182	25
5.55487	23	5.55487	26	5.55487	24	5.55487	20
5.55793	26	5.55793	27	5.55793	30	5.55793	13
5.56098	16	5.56098	27	5.56098	17	5.56098	22
5.56404	16	5.56404	34	5.56404	35	5.56404	27
5.56709	24	5.56709	47	5.56709	29	5.56709	21
5.57014	21	5.57014	38	5.57014	35	5.57014	18
5.5732	24	5.5732	42	5.5732	38	5.5732	22
5.57625	27	5.57625	36	5.57625	31	5.57625	18
5.57931	22	5.57931	45	5.57931	39	5.57931	18
5.58236	24	5.58236	29	5.58236	24	5.58236	20
5.58541	23	5.58541	38	5.58541	47	5.58541	15
5.58847	15	5.58847	27	5.58847	23	5.58847	20
5.59152	27	5.59152	40	5.59152	29	5.59152	14
5.59457	25	5.59457	39	5.59457	36	5.59457	18
5.59763	16	5.59763	42	5.59763	30	5.59763	24
5.60068	12	5.60068	35	5.60068	27	5.60068	15
5.60374	19	5.60374	44	5.60374	27	5.60374	18
5.60679	24	5.60679	38	5.60679	21	5.60679	13
5.60984	20	5.60984	35	5.60984	26	5.60984	26
5.6129	21	5.6129	34	5.6129	32	5.6129	22
5.61595	18	5.61595	35	5.61595	29	5.61595	24
5.619	19	5.619	35	5.619	33	5.619	21
5.62206	19	5.62206	42	5.62206	33	5.62206	26
5.62511	18	5.62511	37	5.62511	17	5.62511	30
5.62817	31	5.62817	28	5.62817	25	5.62817	22
5.63122	28	5.63122	29	5.63122	28	5.63122	28
5.63427	25	5.63427	34	5.63427	24	5.63427	22
5.63733	19	5.63733	38	5.63733	26	5.63733	23
5.64038	27	5.64038	35	5.64038	32	5.64038	25
5.64344	29	5.64344	41	5.64344	33	5.64344	23
5.64649	19	5.64649	25	5.64649	25	5.64649	24
5.64954	12	5.64954	29	5.64954	28	5.64954	22
5.6526	16	5.6526	43	5.6526	22	5.6526	22
5.65565	19	5.65565	26	5.65565	36	5.65565	16
5.6587	23	5.6587	25	5.6587	33	5.6587	16
5.66176	21	5.66176	31	5.66176	25	5.66176	21
5.66481	15	5.66481	30	5.66481	27	5.66481	22
5.66787	18	5.66787	43	5.66787	28	5.66787	24
5.67092	15	5.67092	20	5.67092	23	5.67092	18
5.67397	15	5.67397	31	5.67397	26	5.67397	18
5.67703	11	5.67703	43	5.67703	21	5.67703	15
5.68008	22	5.68008	27	5.68008	22	5.68008	28
5.68313	15	5.68313	35	5.68313	39	5.68313	13
5.68619	19	5.68619	35	5.68619	24	5.68619	20
5.68924	18	5.68924	25	5.68924	21	5.68924	21
5.6923	20	5.6923	38	5.6923	28	5.6923	20
5.69535	24	5.69535	36	5.69535	26	5.69535	17
5.6984	25	5.6984	27	5.6984	21	5.6984	24
5.70146	18	5.70146	32	5.70146	31	5.70146	18
5.70451	14	5.70451	36	5.70451	28	5.70451	17
5.70757	17	5.70757	30	5.70757	32	5.70757	16
5.71062	25	5.71062	31	5.71062	31	5.71062	16
5.71367	19	5.71367	43	5.71367	29	5.71367	15
5.71673	21	5.71673	32	5.71673	26	5.71673	22
5.71978	19	5.71978	29	5.71978	30	5.71978	17
5.72283	23	5.72283	34	5.72283	23	5.72283	18
5.72589	26	5.72589	35	5.72589	32	5.72589	20
5.72894	20	5.72894	21	5.72894	25	5.72894	20
5.732	21	5.732	33	5.732	33	5.732	26
5.73505	23	5.73505	32	5.73505	24	5.73505	18
5.7381	20	5.7381	33	5.7381	27	5.7381	15
5.74116	16	5.74116	29	5.74116	17	5.74116	23
5.74421	23	5.74421	41	5.74421	34	5.74421	27
5.74726	22	5.74726	31	5.74726	36	5.74726	12
5.75032	18	5.75032	38	5.75032	27	5.75032	18
5.75337	16	5.75337	35	5.75337	24	5.75337	27
5.75643	19	5.75643	28	5.75643	28	5.75643	16
5.75948	25	5.75948	37	5.75948	26	5.75948	18
5.76253	13	5.76253	29	5.76253	25	5.76253	17
5.76559	28	5.76559	32	5.76559	34	5.76559	12
5.76864	17	5.76864	26	5.76864	28	5.76864	14
5.7717	12	5.7717	22	5.7717	33	5.7717	22
5.77475	15	5.77475	32	5.77475	28	5.77475	13
5.7778	18	5.7778	38	5.7778	30	5.7778	18
5.78086	19	5.78086	34	5.78086	25	5.78086	22
5.78391	21	5.78391	34	5.78391	36	5.78391	13
5.78696	23	5.78696	38	5.78696	10	5.78696	20
5.79002	17	5.79002	33	5.79002	23	5.79002	21
5.79307	23	5.79307	30	5.79307	25	5.79307	25
5.79613	19	5.79613	26	5.79613	26	5.79613	16
5.79918	17	5.79918	34	5.79918	23	5.79918	17
5.80223	16	5.80223	35	5.80223	21	5.80223	20
5.80529	15	5.80529	42	5.80529	28	5.80529	20
5.80834	24	5.80834	22	5.80834	22	5.80834	18
5.81139	11	5.81139	27	5.81139	28	5.81139	15
5.81445	18	5.81445	23	5.81445	25	5.81445	21
5.8175	12	5.8175	31	5.8175	27	5.8175	16
5.82056	15	5.82056	42	5.82056	28	5.82056	18
5.82361	24	5.82361	30	5.82361	25	5.82361	20
5.82666	17	5.82666	29	5.82666	24	5.82666	22
5.82972	21	5.82972	33	5.82972	26	5.82972	15
5.83277	27	5.83277	34	5.83277	21	5.83277	17
5.83583	21	5.83583	38	5.83583	25	5.83583	17
5.83888	23	5.83888	24	5.83888	30	5.83888	16
5.84193	24	5.84193	25	5.84193	19	5.84193	22
5.84499	24	5.84499	34	5.84499	26	5.84499	21
5.84804	11	5.84804	26	5.84804	28	5.84804	21
5.85109	17	5.85109	40	5.85109	24	5.85109	15
5.85415	22	5.85415	34	5.85415	32	5.85415	20
5.8572	24	5.8572	28	5.8572	30	5.8572	25
5.86026	20	5.86026	38	5.86026	16	5.86026	23
5.86331	19	5.86331	34	5.86331	23	5.86331	20
5.86636	13	5.86636	34	5.86636	24	5.86636	15
5.86942	24	5.86942	26	5.86942	26	5.86942	14
5.87247	19	5.87247	24	5.87247	29	5.87247	17
5.87552	16	5.87552	38	5.87552	21	5.87552	19
5.87858	18	5.87858	33	5.87858	32	5.87858	18
5.88163	16	5.88163	36	5.88163	32	5.88163	11
5.88469	15	5.88469	28	5.88469	20	5.88469	22
5.88774	19	5.88774	40	5.88774	27	5.88774	21
5.89079	16	5.89079	37	5.89079	23	5.89079	19
5.89385	21	5.89385	33	5.89385	21	5.89385	17
5.8969	23	5.8969	29	5.8969	21	5.8969	15
5.89996	19	5.89996	27	5.89996	21	5.89996	15
5.90301	16	5.90301	37	5.90301	28	5.90301	22
5.90606	23	5.90606	29	5.90606	25	5.90606	17
5.90912	21	5.90912	21	5.90912	12	5.90912	14
5.91217	18	5.91217	28	5.91217	22	5.91217	22
5.91522	14	5.91522	22	5.91522	19	5.91522	17
5.91828	18	5.91828	24	5.91828	20	5.91828	20
5.92133	21	5.92133	30	5.92133	27	5.92133	18
5.92439	17	5.92439	22	5.92439	21	5.92439	23
5.92744	18	5.92744	23	5.92744	24	5.92744	25
5.93049	20	5.93049	47	5.93049	27	5.93049	20
5.93355	18	5.93355	31	5.93355	33	5.93355	18
5.9366	26	5.9366	23	5.9366	24	5.9366	19
5.93965	19	5.93965	33	5.93965	31	5.93965	13
5.94271	14	5.94271	34	5.94271	21	5.94271	23
5.94576	16	5.94576	35	5.94576	22	5.94576	19
5.94882	17	5.94882	21	5.94882	26	5.94882	17
5.95187	15	5.95187	30	5.95187	21	5.95187	27
5.95492	15	5.95492	36	5.95492	21	5.95492	16
5.95798	14	5.95798	24	5.95798	31	5.95798	24
5.96103	24	5.96103	41	5.96103	27	5.96103	18
5.96408	16	5.96408	26	5.96408	22	5.96408	21
5.96714	13	5.96714	36	5.96714	12	5.96714	16
5.97019	14	5.97019	36	5.97019	20	5.97019	17
5.97325	21	5.97325	30	5.97325	29	5.97325	22
5.9763	14	5.9763	29	5.9763	28	5.9763	22
5.97935	22	5.97935	35	5.97935	24	5.97935	24
5.98241	14	5.98241	43	5.98241	22	5.98241	19
5.98546	27	5.98546	28	5.98546	23	5.98546	11
5.98852	12	5.98852	30	5.98852	27	5.98852	25
5.99157	16	5.99157	27	5.99157	30	5.99157	13
5.99462	17	5.99462	31	5.99462	27	5.99462	21
5.99768	20	5.99768	28	5.99768	19	5.99768	25
6.00073	17	6.00073	32	6.00073	28	6.00073	17
6.00378	20	6.00378	35	6.00378	25	6.00378	14
6.00684	25	6.00684	36	6.00684	26	6.00684	17
6.00989	23	6.00989	27	6.00989	31	6.00989	23
6.01295	24	6.01295	30	6.01295	34	6.01295	22
6.016	9	6.016	24	6.016	24	6.016	19
6.01905	14	6.01905	24	6.01905	17	6.01905	13
6.02211	16	6.02211	29	6.02211	22	6.02211	14
6.02516	14	6.02516	39	6.02516	27	6.02516	16
6.02821	19	6.02821	25	6.02821	29	6.02821	21
6.03127	16	6.03127	34	6.03127	27	6.03127	16
6.03432	24	6.03432	27	6.03432	19	6.03432	18
6.03738	11	6.03738	38	6.03738	21	6.03738	21
6.04043	22	6.04043	28	6.04043	22	6.04043	20
6.04348	17	6.04348	38	6.04348	23	6.04348	13
6.04654	22	6.04654	21	6.04654	22	6.04654	18
6.04959	20	6.04959	36	6.04959	27	6.04959	19
6.05265	20	6.05265	36	6.05265	22	6.05265	18
6.0557	10	6.0557	19	6.0557	26	6.0557	15
6.05875	7	6.05875	27	6.05875	22	6.05875	23
6.06181	19	6.06181	36	6.06181	21	6.06181	11
6.06486	14	6.06486	25	6.06486	23	6.06486	21
6.06791	18	6.06791	36	6.06791	31	6.06791	18
6.07097	20	6.07097	25	6.07097	24	6.07097	29
6.07402	21	6.07402	26	6.07402	21	6.07402	28
6.07708	11	6.07708	34	6.07708	22	6.07708	15
6.08013	10	6.08013	33	6.08013	18	6.08013	13
6.08318	22	6.08318	32	6.08318	27	6.08318	14
6.08624	19	6.08624	21	6.08624	26	6.08624	23
6.08929	16	6.08929	29	6.08929	19	6.08929	14
6.09234	19	6.09234	28	6.09234	22	6.09234	22
6.0954	21	6.0954	26	6.0954	24	6.0954	16
6.09845	23	6.09845	23	6.09845	18	6.09845	20
6.10151	19	6.10151	27	6.10151	22	6.10151	13
[truncated: 2,097 more rows]

## Sheet: npq1 HL
DARK		DARK		60' LIGHT		60' LIGHT
0	0	0	0	0	0	0	0
0.00305	0	0.00305	0	0.00305	0	0.00305	0
0.00611	0	0.00611	0	0.00611	0	0.00611	0
0.00916	0	0.00916	0	0.00916	0	0.00916	0
0.01222	0	0.01222	0	0.01222	0	0.01222	0
0.01527	0	0.01527	0	0.01527	0	0.01527	0
0.01832	0	0.01832	0	0.01832	0	0.01832	0
0.02138	0	0.02138	0	0.02138	0	0.02138	0
0.02443	0	0.02443	0	0.02443	0	0.02443	0
0.02748	0	0.02748	0	0.02748	0	0.02748	0
0.03054	0	0.03054	0	0.03054	0	0.03054	0
0.03359	0	0.03359	0	0.03359	0	0.03359	0
0.03665	0	0.03665	0	0.03665	0	0.03665	0
0.0397	0	0.0397	0	0.0397	0	0.0397	0
0.04275	0	0.04275	0	0.04275	0	0.04275	0
0.04581	0	0.04581	0	0.04581	0	0.04581	0
0.04886	0	0.04886	0	0.04886	0	0.04886	0
0.05191	0	0.05191	0	0.05191	0	0.05191	0
0.05497	0	0.05497	0	0.05497	0	0.05497	0
0.05802	0	0.05802	0	0.05802	0	0.05802	0
0.06108	0	0.06108	0	0.06108	0	0.06108	0
0.06413	0	0.06413	0	0.06413	0	0.06413	0
0.06718	0	0.06718	0	0.06718	0	0.06718	0
0.07024	0	0.07024	0	0.07024	0	0.07024	0
0.07329	0	0.07329	0	0.07329	0	0.07329	0
0.07635	0	0.07635	0	0.07635	0	0.07635	0
0.0794	0	0.0794	0	0.0794	0	0.0794	0
0.08245	0	0.08245	0	0.08245	0	0.08245	0
0.08551	0	0.08551	0	0.08551	0	0.08551	0
0.08856	0	0.08856	0	0.08856	0	0.08856	0
0.09161	0	0.09161	0	0.09161	0	0.09161	0
0.09467	0	0.09467	0	0.09467	0	0.09467	0
0.09772	0	0.09772	0	0.09772	0	0.09772	0
0.10078	0	0.10078	0	0.10078	0	0.10078	0
0.10383	0	0.10383	0	0.10383	0	0.10383	0
0.10688	0	0.10688	0	0.10688	0	0.10688	0
0.10994	0	0.10994	0	0.10994	0	0.10994	0
0.11299	0	0.11299	0	0.11299	0	0.11299	0
0.11604	0	0.11604	0	0.11604	0	0.11604	0
0.1191	0	0.1191	0	0.1191	0	0.1191	0
0.12215	0	0.12215	0	0.12215	0	0.12215	0
0.12521	0	0.12521	0	0.12521	0	0.12521	0
0.12826	0	0.12826	0	0.12826	0	0.12826	0
0.13131	0	0.13131	0	0.13131	0	0.13131	0
0.13437	0	0.13437	0	0.13437	0	0.13437	0
0.13742	0	0.13742	0	0.13742	0	0.13742	0
0.14048	0	0.14048	0	0.14048	0	0.14048	0
0.14353	0	0.14353	0	0.14353	0	0.14353	0
0.14658	0	0.14658	0	0.14658	0	0.14658	0
0.14964	0	0.14964	0	0.14964	0	0.14964	0
0.15269	0	0.15269	0	0.15269	0	0.15269	0
0.15574	0	0.15574	0	0.15574	0	0.15574	0
0.1588	0	0.1588	0	0.1588	0	0.1588	0
0.16185	0	0.16185	0	0.16185	0	0.16185	0
0.16491	0	0.16491	0	0.16491	0	0.16491	0
0.16796	0	0.16796	0	0.16796	0	0.16796	0
0.17101	0	0.17101	0	0.17101	0	0.17101	0
0.17407	0	0.17407	0	0.17407	0	0.17407	0
0.17712	0	0.17712	0	0.17712	0	0.17712	0
0.18017	0	0.18017	0	0.18017	0	0.18017	0
0.18323	0	0.18323	0	0.18323	0	0.18323	0
0.18628	0	0.18628	0	0.18628	0	0.18628	0
0.18934	0	0.18934	0	0.18934	0	0.18934	0
0.19239	0	0.19239	0	0.19239	0	0.19239	0
0.19544	0	0.19544	0	0.19544	0	0.19544	0
0.1985	0	0.1985	0	0.1985	0	0.1985	0
0.20155	0	0.20155	0	0.20155	0	0.20155	0
0.20461	0	0.20461	0	0.20461	0	0.20461	0
0.20766	0	0.20766	0	0.20766	0	0.20766	0
0.21071	0	0.21071	0	0.21071	0	0.21071	0
0.21377	0	0.21377	0	0.21377	0	0.21377	0
0.21682	0	0.21682	0	0.21682	0	0.21682	0
0.21987	0	0.21987	0	0.21987	0	0.21987	0
0.22293	0	0.22293	0	0.22293	0	0.22293	0
0.22598	0	0.22598	0	0.22598	0	0.22598	0
0.22904	0	0.22904	0	0.22904	0	0.22904	0
0.23209	0	0.23209	0	0.23209	0	0.23209	0
0.23514	0	0.23514	0	0.23514	0	0.23514	0
0.2382	0	0.2382	0	0.2382	0	0.2382	0
0.24125	0	0.24125	0	0.24125	0	0.24125	0
0.2443	0	0.2443	0	0.2443	0	0.2443	0
0.24736	0	0.24736	0	0.24736	0	0.24736	0
0.25041	0	0.25041	0	0.25041	0	0.25041	0
0.25347	0	0.25347	0	0.25347	0	0.25347	0
0.25652	0	0.25652	0	0.25652	0	0.25652	0
0.25957	0	0.25957	0	0.25957	0	0.25957	0
0.26263	0	0.26263	0	0.26263	0	0.26263	0
0.26568	0	0.26568	0	0.26568	0	0.26568	0
0.26874	0	0.26874	0	0.26874	0	0.26874	0
0.27179	0	0.27179	0	0.27179	0	0.27179	0
0.27484	0	0.27484	0	0.27484	0	0.27484	0
0.2779	0	0.2779	0	0.2779	0	0.2779	0
0.28095	0	0.28095	0	0.28095	0	0.28095	0
0.284	0	0.284	0	0.284	0	0.284	0
0.28706	0	0.28706	0	0.28706	0	0.28706	0
0.29011	0	0.29011	0	0.29011	0	0.29011	0
0.29317	0	0.29317	0	0.29317	0	0.29317	0
0.29622	0	0.29622	0	0.29622	0	0.29622	0
0.29927	0	0.29927	0	0.29927	0	0.29927	0
0.30233	0	0.30233	0	0.30233	0	0.30233	0
0.30538	0	0.30538	0	0.30538	0	0.30538	0
0.30843	0	0.30843	0	0.30843	0	0.30843	0
0.31149	0	0.31149	0	0.31149	0	0.31149	0
0.31454	0	0.31454	0	0.31454	0	0.31454	0
0.3176	0	0.3176	0	0.3176	0	0.3176	0
0.32065	0	0.32065	0	0.32065	0	0.32065	0
0.3237	0	0.3237	0	0.3237	0	0.3237	0
0.32676	0	0.32676	0	0.32676	0	0.32676	0
0.32981	0	0.32981	0	0.32981	0	0.32981	0
0.33286	0	0.33286	0	0.33286	0	0.33286	0
0.33592	0	0.33592	0	0.33592	0	0.33592	0
0.33897	0	0.33897	0	0.33897	0	0.33897	0
0.34203	0	0.34203	0	0.34203	0	0.34203	0
0.34508	0	0.34508	0	0.34508	0	0.34508	0
0.34813	0	0.34813	0	0.34813	0	0.34813	0
0.35119	0	0.35119	0	0.35119	0	0.35119	0
0.35424	0	0.35424	0	0.35424	0	0.35424	0
0.3573	0	0.3573	0	0.3573	0	0.3573	0
0.36035	0	0.36035	0	0.36035	0	0.36035	0
0.3634	0	0.3634	0	0.3634	0	0.3634	0
0.36646	0	0.36646	0	0.36646	0	0.36646	0
0.36951	0	0.36951	0	0.36951	0	0.36951	0
0.37256	0	0.37256	0	0.37256	0	0.37256	0
0.37562	0	0.37562	0	0.37562	0	0.37562	0
0.37867	0	0.37867	0	0.37867	0	0.37867	0
0.38173	0	0.38173	0	0.38173	0	0.38173	0
0.38478	0	0.38478	0	0.38478	0	0.38478	0
0.38783	0	0.38783	0	0.38783	0	0.38783	0
0.39089	0	0.39089	0	0.39089	0	0.39089	0
0.39394	0	0.39394	0	0.39394	0	0.39394	0
0.39699	0	0.39699	0	0.39699	0	0.39699	0
0.40005	0	0.40005	0	0.40005	0	0.40005	0
0.4031	0	0.4031	0	0.4031	0	0.4031	0
0.40616	0	0.40616	0	0.40616	0	0.40616	0
0.40921	0	0.40921	0	0.40921	0	0.40921	0
0.41226	0	0.41226	0	0.41226	0	0.41226	0
0.41532	0	0.41532	0	0.41532	0	0.41532	0
0.41837	0	0.41837	0	0.41837	0	0.41837	0
0.42143	0	0.42143	0	0.42143	0	0.42143	0
0.42448	0	0.42448	0	0.42448	0	0.42448	0
0.42753	0	0.42753	0	0.42753	0	0.42753	0
0.43059	0	0.43059	0	0.43059	0	0.43059	0
0.43364	0	0.43364	0	0.43364	0	0.43364	0
0.43669	0	0.43669	0	0.43669	0	0.43669	0
0.43975	0	0.43975	0	0.43975	0	0.43975	0
0.4428	0	0.4428	0	0.4428	0	0.4428	0
0.44586	0	0.44586	0	0.44586	0	0.44586	0
0.44891	0	0.44891	0	0.44891	0	0.44891	0
0.45196	0	0.45196	0	0.45196	0	0.45196	0
0.45502	0	0.45502	0	0.45502	0	0.45502	0
0.45807	0	0.45807	0	0.45807	0	0.45807	0
0.46112	0	0.46112	0	0.46112	0	0.46112	0
0.46418	0	0.46418	0	0.46418	0	0.46418	0
0.46723	0	0.46723	0	0.46723	0	0.46723	0
0.47029	0	0.47029	0	0.47029	0	0.47029	0
0.47334	0	0.47334	0	0.47334	0	0.47334	0
0.47639	0	0.47639	0	0.47639	0	0.47639	0
0.47945	0	0.47945	0	0.47945	0	0.47945	0
0.4825	0	0.4825	0	0.4825	0	0.4825	0
0.48556	0	0.48556	0	0.48556	0	0.48556	0
0.48861	0	0.48861	0	0.48861	0	0.48861	0
0.49166	0	0.49166	0	0.49166	0	0.49166	0
0.49472	0	0.49472	0	0.49472	0	0.49472	0
0.49777	0	0.49777	0	0.49777	0	0.49777	0
0.50082	0	0.50082	0	0.50082	0	0.50082	0
0.50388	0	0.50388	0	0.50388	0	0.50388	0
0.50693	0	0.50693	0	0.50693	0	0.50693	0
0.50999	0	0.50999	0	0.50999	0	0.50999	0
0.51304	0	0.51304	0	0.51304	0	0.51304	0
0.51609	0	0.51609	0	0.51609	0	0.51609	0
0.51915	0	0.51915	0	0.51915	0	0.51915	0
0.5222	0	0.5222	0	0.5222	0	0.5222	0
0.52525	0	0.52525	0	0.52525	0	0.52525	0
0.52831	0	0.52831	0	0.52831	0	0.52831	0
0.53136	0	0.53136	0	0.53136	0	0.53136	0
0.53442	0	0.53442	0	0.53442	0	0.53442	0
0.53747	0	0.53747	0	0.53747	0	0.53747	0
0.54052	0	0.54052	0	0.54052	0	0.54052	0
0.54358	0	0.54358	0	0.54358	0	0.54358	0
0.54663	0	0.54663	0	0.54663	0	0.54663	0
0.54969	0	0.54969	0	0.54969	0	0.54969	0
0.55274	0	0.55274	0	0.55274	0	0.55274	0
0.55579	0	0.55579	0	0.55579	0	0.55579	0
0.55885	0	0.55885	0	0.55885	0	0.55885	0
0.5619	0	0.5619	0	0.5619	0	0.5619	0
0.56495	0	0.56495	0	0.56495	0	0.56495	0
0.56801	0	0.56801	0	0.56801	0	0.56801	0
0.57106	0	0.57106	0	0.57106	0	0.57106	0
0.57412	0	0.57412	0	0.57412	0	0.57412	0
0.57717	0	0.57717	0	0.57717	0	0.57717	0
0.58022	0	0.58022	0	0.58022	0	0.58022	0
0.58328	0	0.58328	0	0.58328	0	0.58328	0
0.58633	0	0.58633	0	0.58633	0	0.58633	0
0.58938	0	0.58938	0	0.58938	0	0.58938	0
0.59244	0	0.59244	0	0.59244	0	0.59244	0
0.59549	0	0.59549	0	0.59549	0	0.59549	0
0.59855	0	0.59855	0	0.59855	0	0.59855	0
0.6016	0	0.6016	0	0.6016	0	0.6016	0
0.60465	0	0.60465	0	0.60465	0	0.60465	0
0.60771	0	0.60771	0	0.60771	0	0.60771	0
0.61076	0	0.61076	0	0.61076	0	0.61076	0
0.61382	0	0.61382	0	0.61382	0	0.61382	0
0.61687	0	0.61687	0	0.61687	0	0.61687	0
0.61992	0	0.61992	0	0.61992	0	0.61992	0
0.62298	0	0.62298	0	0.62298	0	0.62298	0
0.62603	0	0.62603	0	0.62603	0	0.62603	0
0.62908	0	0.62908	0	0.62908	0	0.62908	0
0.63214	0	0.63214	0	0.63214	0	0.63214	0
0.63519	12	0.63519	9	0.63519	5	0.63519	4
0.63825	1	0.63825	13	0.63825	11	0.63825	7
0.6413	5	0.6413	13	0.6413	6	0.6413	5
0.64435	6	0.64435	16	0.64435	4	0.64435	8
0.64741	4	0.64741	11	0.64741	9	0.64741	4
0.65046	6	0.65046	10	0.65046	4	0.65046	3
0.65351	9	0.65351	11	0.65351	3	0.65351	5
0.65657	6	0.65657	9	0.65657	1	0.65657	4
0.65962	1	0.65962	10	0.65962	7	0.65962	4
0.66268	8	0.66268	7	0.66268	7	0.66268	2
0.66573	7	0.66573	10	0.66573	4	0.66573	5
0.66878	1	0.66878	6	0.66878	2	0.66878	1
0.67184	3	0.67184	9	0.67184	5	0.67184	5
0.67489	3	0.67489	10	0.67489	0	0.67489	4
0.67795	6	0.67795	10	0.67795	8	0.67795	7
0.681	6	0.681	12	0.681	3	0.681	3
0.68405	4	0.68405	9	0.68405	6	0.68405	7
0.68711	8	0.68711	9	0.68711	1	0.68711	3
0.69016	8	0.69016	9	0.69016	3	0.69016	2
0.69321	4	0.69321	6	0.69321	4	0.69321	4
0.69627	4	0.69627	10	0.69627	6	0.69627	3
0.69932	8	0.69932	5	0.69932	1	0.69932	5
0.70238	6	0.70238	10	0.70238	7	0.70238	5
0.70543	2	0.70543	8	0.70543	5	0.70543	4
0.70848	8	0.70848	7	0.70848	8	0.70848	3
0.71154	7	0.71154	12	0.71154	2	0.71154	5
0.71459	3	0.71459	7	0.71459	3	0.71459	1
0.71764	5	0.71764	13	0.71764	5	0.71764	2
0.7207	6	0.7207	8	0.7207	2	0.7207	3
0.72375	5	0.72375	13	0.72375	3	0.72375	2
0.72681	4	0.72681	12	0.72681	4	0.72681	5
0.72986	7	0.72986	7	0.72986	9	0.72986	3
0.73291	8	0.73291	4	0.73291	3	0.73291	6
0.73597	8	0.73597	5	0.73597	5	0.73597	5
0.73902	6	0.73902	8	0.73902	3	0.73902	7
0.74208	4	0.74208	10	0.74208	2	0.74208	8
0.74513	8	0.74513	15	0.74513	3	0.74513	3
0.74818	5	0.74818	10	0.74818	3	0.74818	1
0.75124	4	0.75124	9	0.75124	6	0.75124	1
0.75429	6	0.75429	9	0.75429	6	0.75429	5
0.75734	5	0.75734	5	0.75734	3	0.75734	2
0.7604	5	0.7604	8	0.7604	10	0.7604	3
0.76345	5	0.76345	13	0.76345	4	0.76345	2
0.76651	3	0.76651	10	0.76651	4	0.76651	3
0.76956	3	0.76956	6	0.76956	5	0.76956	2
0.77261	3	0.77261	14	0.77261	4	0.77261	4
0.77567	5	0.77567	6	0.77567	8	0.77567	7
0.77872	6	0.77872	7	0.77872	3	0.77872	5
0.78177	6	0.78177	7	0.78177	5	0.78177	2
0.78483	3	0.78483	13	0.78483	3	0.78483	1
0.78788	6	0.78788	8	0.78788	6	0.78788	2
0.79094	3	0.79094	12	0.79094	4	0.79094	2
0.79399	2	0.79399	7	0.79399	3	0.79399	2
0.79704	9	0.79704	16	0.79704	4	0.79704	3
0.8001	2	0.8001	9	0.8001	5	0.8001	0
0.80315	3	0.80315	14	0.80315	7	0.80315	2
0.80621	12	0.80621	10	0.80621	7	0.80621	2
0.80926	3	0.80926	11	0.80926	5	0.80926	1
0.81231	3	0.81231	9	0.81231	4	0.81231	3
0.81537	5	0.81537	11	0.81537	7	0.81537	1
0.81842	1	0.81842	9	0.81842	7	0.81842	5
0.82147	6	0.82147	11	0.82147	4	0.82147	4
0.82453	2	0.82453	7	0.82453	8	0.82453	5
0.82758	7	0.82758	4	0.82758	3	0.82758	3
0.83064	4	0.83064	3	0.83064	5	0.83064	4
0.83369	3	0.83369	12	0.83369	14	0.83369	4
0.83674	7	0.83674	13	0.83674	8	0.83674	1
0.8398	3	0.8398	7	0.8398	6	0.8398	1
0.84285	4	0.84285	8	0.84285	4	0.84285	3
0.8459	3	0.8459	5	0.8459	7	0.8459	2
0.84896	5	0.84896	10	0.84896	3	0.84896	3
0.85201	8	0.85201	10	0.85201	4	0.85201	1
0.85507	5	0.85507	10	0.85507	8	0.85507	3
0.85812	6	0.85812	13	0.85812	7	0.85812	7
0.86117	6	0.86117	13	0.86117	4	0.86117	3
0.86423	11	0.86423	8	0.86423	3	0.86423	5
0.86728	7	0.86728	7	0.86728	7	0.86728	5
0.87033	6	0.87033	11	0.87033	7	0.87033	2
0.87339	10	0.87339	11	0.87339	3	0.87339	6
0.87644	6	0.87644	12	0.87644	6	0.87644	5
0.8795	11	0.8795	12	0.8795	5	0.8795	4
0.88255	4	0.88255	9	0.88255	6	0.88255	5
0.8856	8	0.8856	8	0.8856	6	0.8856	4
0.88866	9	0.88866	11	0.88866	4	0.88866	4
0.89171	5	0.89171	19	0.89171	9	0.89171	8
0.89477	8	0.89477	14	0.89477	9	0.89477	2
0.89782	7	0.89782	7	0.89782	7	0.89782	7
0.90087	5	0.90087	14	0.90087	5	0.90087	7
0.90393	10	0.90393	13	0.90393	9	0.90393	5
0.90698	5	0.90698	7	0.90698	6	0.90698	10
0.91003	12	0.91003	16	0.91003	7	0.91003	4
0.91309	9	0.91309	14	0.91309	13	0.91309	7
0.91614	14	0.91614	20	0.91614	10	0.91614	13
0.9192	12	0.9192	10	0.9192	11	0.9192	8
0.92225	8	0.92225	16	0.92225	10	0.92225	10
0.9253	29	0.9253	18	0.9253	13	0.9253	14
0.92836	29	0.92836	24	0.92836	10	0.92836	14
0.93141	23	0.93141	22	0.93141	16	0.93141	16
0.93446	23	0.93446	21	0.93446	21	0.93446	20
0.93752	31	0.93752	33	0.93752	16	0.93752	14
0.94057	32	0.94057	30	0.94057	19	0.94057	21
0.94363	39	0.94363	33	0.94363	32	0.94363	27
0.94668	30	0.94668	27	0.94668	37	0.94668	26
0.94973	55	0.94973	38	0.94973	31	0.94973	29
0.95279	48	0.95279	47	0.95279	41	0.95279	37
0.95584	49	0.95584	55	0.95584	48	0.95584	52
0.9589	62	0.9589	72	0.9589	53	0.9589	53
0.96195	82	0.96195	77	0.96195	68	0.96195	67
0.965	100	0.965	86	0.965	76	0.965	70
0.96806	105	0.96806	92	0.96806	78	0.96806	77
0.97111	129	0.97111	101	0.97111	78	0.97111	92
0.97416	136	0.97416	114	0.97416	125	0.97416	88
0.97722	143	0.97722	111	0.97722	114	0.97722	120
0.98027	173	0.98027	130	0.98027	122	0.98027	152
0.98333	195	0.98333	151	0.98333	138	0.98333	136
0.98638	223	0.98638	192	0.98638	182	0.98638	155
0.98943	230	0.98943	179	0.98943	180	0.98943	191
0.99249	273	0.99249	194	0.99249	229	0.99249	185
0.99554	326	0.99554	240	0.99554	209	0.99554	205
0.99859	320	0.99859	252	0.99859	262	0.99859	257
1.00165	324	1.00165	257	1.00165	271	1.00165	277
1.0047	397	1.0047	307	1.0047	286	1.0047	330
1.00776	440	1.00776	336	1.00776	366	1.00776	306
1.01081	464	1.01081	369	1.01081	402	1.01081	354
1.01386	467	1.01386	390	1.01386	386	1.01386	370
1.01692	575	1.01692	384	1.01692	429	1.01692	441
1.01997	600	1.01997	476	1.01997	445	1.01997	455
1.02303	651	1.02303	452	1.02303	517	1.02303	523
1.02608	696	1.02608	467	1.02608	491	1.02608	470
1.02913	744	1.02913	537	1.02913	597	1.02913	538
1.03219	762	1.03219	530	1.03219	550	1.03219	627
1.03524	831	1.03524	577	1.03524	614	1.03524	632
1.03829	867	1.03829	635	1.03829	686	1.03829	622
1.04135	944	1.04135	680	1.04135	656	1.04135	707
1.0444	1000	1.0444	738	1.0444	713	1.0444	761
1.04746	1022	1.04746	770	1.04746	790	1.04746	765
1.05051	1119	1.05051	778	1.05051	839	1.05051	830
1.05356	1204	1.05356	795	1.05356	876	1.05356	859
1.05662	1207	1.05662	820	1.05662	832	1.05662	911
1.05967	1346	1.05967	874	1.05967	904	1.05967	1017
1.06272	1282	1.06272	963	1.06272	969	1.06272	964
1.06578	1385	1.06578	940	1.06578	1021	1.06578	975
1.06883	1444	1.06883	995	1.06883	1030	1.06883	1019
1.07189	1522	1.07189	1037	1.07189	1060	1.07189	1014
1.07494	1474	1.07494	1052	1.07494	1128	1.07494	1115
1.07799	1582	1.07799	1078	1.07799	1096	1.07799	1122
1.08105	1628	1.08105	1114	1.08105	1162	1.08105	1149
1.0841	1766	1.0841	1175	1.0841	1214	1.0841	1211
1.08716	1729	1.08716	1259	1.08716	1254	1.08716	1300
1.09021	1815	1.09021	1222	1.09021	1236	1.09021	1342
1.09326	1837	1.09326	1306	1.09326	1356	1.09326	1320
1.09632	1851	1.09632	1342	1.09632	1317	1.09632	1386
1.09937	1969	1.09937	1338	1.09937	1350	1.09937	1411
1.10242	2055	1.10242	1460	1.10242	1450	1.10242	1402
1.10548	2097	1.10548	1451	1.10548	1391	1.10548	1462
1.10853	2132	1.10853	1384	1.10853	1505	1.10853	1415
1.11159	2134	1.11159	1512	1.11159	1511	1.11159	1497
1.11464	2171	1.11464	1506	1.11464	1526	1.11464	1552
1.11769	2243	1.11769	1535	1.11769	1635	1.11769	1605
1.12075	2219	1.12075	1548	1.12075	1584	1.12075	1607
1.1238	2317	1.1238	1600	1.1238	1665	1.1238	1625
1.12685	2394	1.12685	1582	1.12685	1623	1.12685	1596
1.12991	2352	1.12991	1597	1.12991	1627	1.12991	1697
1.13296	2467	1.13296	1648	1.13296	1692	1.13296	1686
1.13602	2510	1.13602	1726	1.13602	1741	1.13602	1694
1.13907	2439	1.13907	1722	1.13907	1696	1.13907	1690
1.14212	2475	1.14212	1708	1.14212	1747	1.14212	1701
1.14518	2574	1.14518	1800	1.14518	1782	1.14518	1804
1.14823	2614	1.14823	1777	1.14823	1804	1.14823	1806
1.15129	2553	1.15129	1892	1.15129	1781	1.15129	1776
1.15434	2749	1.15434	1838	1.15434	1820	1.15434	1874
1.15739	2635	1.15739	1827	1.15739	1801	1.15739	1860
1.16045	2712	1.16045	1876	1.16045	1822	1.16045	1879
1.1635	2768	1.1635	1820	1.1635	1825	1.1635	1877
1.16655	2780	1.16655	1863	1.16655	1900	1.16655	1869
1.16961	2799	1.16961	1928	1.16961	1827	1.16961	1919
1.17266	2848	1.17266	1966	1.17266	1889	1.17266	1910
1.17572	2950	1.17572	1996	1.17572	1951	1.17572	1949
1.17877	2846	1.17877	1996	1.17877	1915	1.17877	1940
1.18182	2886	1.18182	2023	1.18182	1935	1.18182	2020
1.18488	3035	1.18488	1992	1.18488	1953	1.18488	1884
1.18793	2949	1.18793	2077	1.18793	1944	1.18793	1990
1.19098	2999	1.19098	2054	1.19098	2009	1.19098	2054
1.19404	2906	1.19404	2095	1.19404	1958	1.19404	2014
1.19709	2992	1.19709	2026	1.19709	1988	1.19709	2076
1.20015	3014	1.20015	2073	1.20015	1962	1.20015	2018
1.2032	3013	1.2032	2000	1.2032	2093	1.2032	2023
1.20625	3018	1.20625	2123	1.20625	2000	1.20625	1996
1.20931	3061	1.20931	2129	1.20931	1964	1.20931	2050
1.21236	3198	1.21236	2086	1.21236	2031	1.21236	2163
1.21542	3183	1.21542	2089	1.21542	2025	1.21542	2071
1.21847	3088	1.21847	2137	1.21847	2007	1.21847	2154
1.22152	3163	1.22152	2168	1.22152	2017	1.22152	2096
1.22458	3171	1.22458	2212	1.22458	2077	1.22458	2068
1.22763	3206	1.22763	2203	1.22763	2118	1.22763	2109
1.23068	3153	1.23068	2155	1.23068	2095	1.23068	2124
1.23374	3228	1.23374	2118	1.23374	2088	1.23374	2158
1.23679	3184	1.23679	2241	1.23679	2125	1.23679	2053
1.23985	3283	1.23985	2254	1.23985	2078	1.23985	2107
1.2429	3215	1.2429	2230	1.2429	2135	1.2429	2101
1.24595	3385	1.24595	2170	1.24595	2057	1.24595	2132
1.24901	3238	1.24901	2199	1.24901	2078	1.24901	2156
1.25206	3287	1.25206	2247	1.25206	2010	1.25206	2112
1.25511	3285	1.25511	2226	1.25511	2113	1.25511	2051
1.25817	3322	1.25817	2153	1.25817	2087	1.25817	2145
1.26122	3321	1.26122	2221	1.26122	2089	1.26122	2113
1.26428	3288	1.26428	2221	1.26428	2176	1.26428	2113
1.26733	3239	1.26733	2267	1.26733	2204	1.26733	2141
1.27038	3340	1.27038	2244	1.27038	2150	1.27038	2292
1.27344	3445	1.27344	2334	1.27344	2099	1.27344	2219
1.27649	3305	1.27649	2215	1.27649	2120	1.27649	2129
1.27955	3341	1.27955	2213	1.27955	2166	1.27955	2160
1.2826	3408	1.2826	2282	1.2826	2064	1.2826	2117
1.28565	3350	1.28565	2337	1.28565	2078	1.28565	2161
1.28871	3337	1.28871	2287	1.28871	2102	1.28871	2137
1.29176	3435	1.29176	2275	1.29176	1981	1.29176	2105
1.29481	3389	1.29481	2302	1.29481	2182	1.29481	2181
1.29787	3380	1.29787	2287	1.29787	2003	1.29787	2124
1.30092	3389	1.30092	2295	1.30092	2081	1.30092	2159
1.30398	3327	1.30398	2289	1.30398	2000	1.30398	2157
1.30703	3445	1.30703	2278	1.30703	1997	1.30703	2150
1.31008	3343	1.31008	2327	1.31008	2031	1.31008	2187
1.31314	3316	1.31314	2262	1.31314	2018	1.31314	2145
1.31619	3285	1.31619	2204	1.31619	2010	1.31619	2118
1.31924	3369	1.31924	2145	1.31924	2043	1.31924	2155
1.3223	3424	1.3223	2188	1.3223	2008	1.3223	2129
1.32535	3319	1.32535	2314	1.32535	2006	1.32535	2109
1.32841	3314	1.32841	2246	1.32841	2054	1.32841	2128
1.33146	3419	1.33146	2295	1.33146	2049	1.33146	2143
1.33451	3385	1.33451	2285	1.33451	1949	1.33451	2011
1.33757	3281	1.33757	2206	1.33757	2004	1.33757	2160
1.34062	3216	1.34062	2255	1.34062	2047	1.34062	2098
1.34368	3339	1.34368	2224	1.34368	1896	1.34368	1965
1.34673	3143	1.34673	2137	1.34673	1976	1.34673	2064
1.34978	3328	1.34978	2186	1.34978	1924	1.34978	1965
1.35284	3253	1.35284	2313	1.35284	1976	1.35284	2035
1.35589	3140	1.35589	2097	1.35589	1857	1.35589	2042
1.35894	3238	1.35894	2225	1.35894	1970	1.35894	1956
1.362	3232	1.362	2297	1.362	1837	1.362	1935
1.36505	3282	1.36505	2268	1.36505	1873	1.36505	2064
1.36811	3254	1.36811	2133	1.36811	1907	1.36811	2080
1.37116	3234	1.37116	2177	1.37116	1926	1.37116	1892
1.37421	3107	1.37421	2195	1.37421	1823	1.37421	1965
1.37727	3172	1.37727	2196	1.37727	1872	1.37727	1911
1.38032	3132	1.38032	2068	1.38032	1843	1.38032	1961
1.38337	3229	1.38337	2118	1.38337	1842	1.38337	1971
1.38643	3105	1.38643	2105	1.38643	1849	1.38643	1929
1.38948	3145	1.38948	1961	1.38948	1863	1.38948	1872
1.39254	3127	1.39254	2077	1.39254	1774	1.39254	1941
1.39559	3082	1.39559	2046	1.39559	1801	1.39559	1935
1.39864	3061	1.39864	2074	1.39864	1744	1.39864	1857
1.4017	3044	1.4017	2023	1.4017	1803	1.4017	1815
1.40475	3121	1.40475	2060	1.40475	1766	1.40475	1831
1.40781	3106	1.40781	1992	1.40781	1805	1.40781	1840
1.41086	3089	1.41086	2046	1.41086	1697	1.41086	1782
1.41391	2991	1.41391	1942	1.41391	1712	1.41391	1879
1.41697	3036	1.41697	2058	1.41697	1708	1.41697	1826
1.42002	2974	1.42002	1913	1.42002	1717	1.42002	1782
1.42307	2982	1.42307	2030	1.42307	1649	1.42307	1803
1.42613	2934	1.42613	2030	1.42613	1648	1.42613	1726
1.42918	2946	1.42918	1933	1.42918	1680	1.42918	1758
1.43224	2903	1.43224	1947	1.43224	1648	1.43224	1783
1.43529	2910	1.43529	1972	1.43529	1693	1.43529	1707
1.43834	2914	1.43834	1956	1.43834	1647	1.43834	1705
1.4414	2942	1.4414	1945	1.4414	1582	1.4414	1728
1.44445	2775	1.44445	1836	1.44445	1624	1.44445	1683
1.4475	2837	1.4475	1956	1.4475	1557	1.4475	1630
1.45056	2816	1.45056	1908	1.45056	1552	1.45056	1668
1.45361	2786	1.45361	1907	1.45361	1564	1.45361	1712
1.45667	2736	1.45667	1799	1.45667	1582	1.45667	1654
1.45972	2779	1.45972	1901	1.45972	1455	1.45972	1591
1.46277	2683	1.46277	1734	1.46277	1513	1.46277	1708
1.46583	2610	1.46583	1807	1.46583	1513	1.46583	1596
1.46888	2747	1.46888	1838	1.46888	1436	1.46888	1700
1.47193	2752	1.47193	1834	1.47193	1494	1.47193	1619
1.47499	2642	1.47499	1754	1.47499	1565	1.47499	1547
1.47804	2739	1.47804	1746	1.47804	1517	1.47804	1691
1.4811	2700	1.4811	1720	1.4811	1372	1.4811	1600
1.48415	2625	1.48415	1775	1.48415	1462	1.48415	1588
1.4872	2615	1.4872	1687	1.4872	1497	1.4872	1638
1.49026	2558	1.49026	1705	1.49026	1391	1.49026	1564
1.49331	2596	1.49331	1726	1.49331	1409	1.49331	1524
1.49637	2529	1.49637	1717	1.49637	1444	1.49637	1520
1.49942	2562	1.49942	1742	1.49942	1303	1.49942	1519
1.50247	2547	1.50247	1774	1.50247	1397	1.50247	1528
1.50553	2651	1.50553	1698	1.50553	1369	1.50553	1616
1.50858	2537	1.50858	1704	1.50858	1335	1.50858	1443
1.51163	2518	1.51163	1642	1.51163	1268	1.51163	1475
1.51469	2564	1.51469	1690	1.51469	1344	1.51469	1398
1.51774	2573	1.51774	1721	1.51774	1409	1.51774	1509
1.5208	2472	1.5208	1550	1.5208	1311	1.5208	1475
1.52385	2536	1.52385	1641	1.52385	1434	1.52385	1488
1.5269	2509	1.5269	1617	1.5269	1297	1.5269	1443
1.52996	2497	1.52996	1616	1.52996	1256	1.52996	1409
1.53301	2489	1.53301	1613	1.53301	1283	1.53301	1460
1.53606	2383	1.53606	1607	1.53606	1358	1.53606	1361
1.53912	2473	1.53912	1621	1.53912	1367	1.53912	1419
1.54217	2359	1.54217	1562	1.54217	1291	1.54217	1389
1.54523	2423	1.54523	1613	1.54523	1303	1.54523	1396
1.54828	2398	1.54828	1642	1.54828	1259	1.54828	1356
1.55133	2389	1.55133	1549	1.55133	1285	1.55133	1384
1.55439	2377	1.55439	1591	1.55439	1180	1.55439	1344
1.55744	2316	1.55744	1563	1.55744	1254	1.55744	1326
1.5605	2326	1.5605	1579	1.5605	1183	1.5605	1342
1.56355	2324	1.56355	1567	1.56355	1235	1.56355	1339
1.5666	2311	1.5666	1571	1.5666	1237	1.5666	1344
1.56966	2375	1.56966	1528	1.56966	1233	1.56966	1347
1.57271	2260	1.57271	1539	1.57271	1217	1.57271	1228
1.57576	2339	1.57576	1541	1.57576	1199	1.57576	1282
1.57882	2300	1.57882	1471	1.57882	1191	1.57882	1287
1.58187	2223	1.58187	1496	1.58187	1162	1.58187	1240
1.58493	2257	1.58493	1513	1.58493	1169	1.58493	1274
1.58798	2319	1.58798	1539	1.58798	1145	1.58798	1262
1.59103	2331	1.59103	1491	1.59103	1233	1.59103	1334
1.59409	2283	1.59409	1504	1.59409	1196	1.59409	1260
1.59714	2249	1.59714	1389	1.59714	1174	1.59714	1266
1.60019	2227	1.60019	1481	1.60019	1121	1.60019	1231
1.60325	2276	1.60325	1490	1.60325	1174	1.60325	1280
1.6063	2249	1.6063	1527	1.6063	1077	1.6063	1240
1.60936	2178	1.60936	1512	1.60936	1098	1.60936	1307
1.61241	2168	1.61241	1453	1.61241	1184	1.61241	1228
1.61546	2192	1.61546	1439	1.61546	1110	1.61546	1242
1.61852	2151	1.61852	1465	1.61852	1086	1.61852	1263
1.62157	2120	1.62157	1507	1.62157	1080	1.62157	1224
1.62463	2140	1.62463	1431	1.62463	1092	1.62463	1210
1.62768	2176	1.62768	1381	1.62768	1080	1.62768	1244
1.63073	2187	1.63073	1449	1.63073	1042	1.63073	1229
1.63379	2146	1.63379	1407	1.63379	1063	1.63379	1164
1.63684	2178	1.63684	1379	1.63684	1067	1.63684	1200
1.63989	2156	1.63989	1387	1.63989	1053	1.63989	1183
1.64295	2117	1.64295	1401	1.64295	1040	1.64295	1169
1.646	2063	1.646	1363	1.646	1077	1.646	1165
1.64906	2092	1.64906	1390	1.64906	999	1.64906	1170
1.65211	2013	1.65211	1352	1.65211	1084	1.65211	1176
1.65516	2007	1.65516	1390	1.65516	973	1.65516	1126
1.65822	2096	1.65822	1336	1.65822	1019	1.65822	1138
1.66127	1963	1.66127	1380	1.66127	1029	1.66127	1147
1.66432	2072	1.66432	1360	1.66432	1000	1.66432	1063
1.66738	2037	1.66738	1309	1.66738	989	1.66738	1171
1.67043	1971	1.67043	1305	1.67043	998	1.67043	1100
1.67349	2016	1.67349	1377	1.67349	984	1.67349	1120
1.67654	1953	1.67654	1331	1.67654	923	1.67654	1047
1.67959	1939	1.67959	1373	1.67959	1017	1.67959	1088
1.68265	2006	1.68265	1312	1.68265	937	1.68265	1064
1.6857	2006	1.6857	1337	1.6857	921	1.6857	1076
1.68876	1929	1.68876	1271	1.68876	891	1.68876	1077
1.69181	1962	1.69181	1262	1.69181	903	1.69181	1055
1.69486	1938	1.69486	1275	1.69486	915	1.69486	1089
1.69792	1950	1.69792	1264	1.69792	916	1.69792	1065
1.70097	1895	1.70097	1233	1.70097	921	1.70097	1102
1.70402	1867	1.70402	1234	1.70402	903	1.70402	1074
1.70708	1909	1.70708	1197	1.70708	826	1.70708	998
1.71013	1869	1.71013	1216	1.71013	920	1.71013	1048
1.71319	1897	1.71319	1185	1.71319	905	1.71319	971
1.71624	1833	1.71624	1195	1.71624	869	1.71624	1039
1.71929	1785	1.71929	1154	1.71929	852	1.71929	1018
1.72235	1818	1.72235	1196	1.72235	888	1.72235	951
1.7254	1849	1.7254	1170	1.7254	915	1.7254	987
1.72845	1777	1.72845	1196	1.72845	878	1.72845	949
1.73151	1684	1.73151	1149	1.73151	870	1.73151	989
1.73456	1826	1.73456	1140	1.73456	888	1.73456	969
1.73762	1826	1.73762	1189	1.73762	850	1.73762	883
1.74067	1724	1.74067	1124	1.74067	799	1.74067	913
1.74372	1768	1.74372	1223	1.74372	856	1.74372	944
1.74678	1678	1.74678	1119	1.74678	814	1.74678	900
1.74983	1752	1.74983	1132	1.74983	855	1.74983	883
1.75289	1687	1.75289	1104	1.75289	777	1.75289	867
1.75594	1656	1.75594	1143	1.75594	771	1.75594	902
1.75899	1659	1.75899	1106	1.75899	819	1.75899	930
1.76205	1666	1.76205	1101	1.76205	736	1.76205	812
1.7651	1622	1.7651	1088	1.7651	767	1.7651	867
1.76815	1670	1.76815	1069	1.76815	764	1.76815	902
1.77121	1596	1.77121	1068	1.77121	726	1.77121	835
1.77426	1663	1.77426	1068	1.77426	774	1.77426	863
1.77732	1606	1.77732	1144	1.77732	764	1.77732	877
1.78037	1578	1.78037	1075	1.78037	709	1.78037	838
1.78342	1670	1.78342	1052	1.78342	790	1.78342	862
1.78648	1587	1.78648	1060	1.78648	754	1.78648	852
1.78953	1556	1.78953	997	1.78953	758	1.78953	850
1.79258	1598	1.79258	1059	1.79258	765	1.79258	819
1.79564	1524	1.79564	1103	1.79564	695	1.79564	815
1.79869	1579	1.79869	987	1.79869	748	1.79869	839
1.80175	1488	1.80175	1061	1.80175	703	1.80175	795
1.8048	1540	1.8048	1029	1.8048	662	1.8048	797
1.80785	1529	1.80785	983	1.80785	644	1.80785	779
1.81091	1512	1.81091	1009	1.81091	674	1.81091	792
1.81396	1518	1.81396	975	1.81396	690	1.81396	779
1.81702	1490	1.81702	1013	1.81702	691	1.81702	819
1.82007	1481	1.82007	999	1.82007	699	1.82007	806
1.82312	1511	1.82312	990	1.82312	666	1.82312	775
1.82618	1504	1.82618	974	1.82618	660	1.82618	772
1.82923	1482	1.82923	923	1.82923	680	1.82923	783
1.83228	1428	1.83228	951	1.83228	662	1.83228	778
1.83534	1506	1.83534	987	1.83534	670	1.83534	741
1.83839	1528	1.83839	957	1.83839	686	1.83839	760
1.84145	1382	1.84145	948	1.84145	671	1.84145	755
1.8445	1416	1.8445	919	1.8445	615	1.8445	687
1.84755	1424	1.84755	948	1.84755	646	1.84755	761
1.85061	1380	1.85061	935	1.85061	667	1.85061	737
1.85366	1399	1.85366	911	1.85366	654	1.85366	739
1.85671	1435	1.85671	938	1.85671	625	1.85671	789
1.85977	1437	1.85977	906	1.85977	652	1.85977	726
1.86282	1436	1.86282	916	1.86282	616	1.86282	724
1.86588	1390	1.86588	944	1.86588	602	1.86588	699
1.86893	1433	1.86893	916	1.86893	655	1.86893	737
1.87198	1310	1.87198	938	1.87198	644	1.87198	728
1.87504	1383	1.87504	915	1.87504	612	1.87504	759
1.87809	1396	1.87809	963	1.87809	660	1.87809	708
1.88115	1463	1.88115	956	1.88115	619	1.88115	696
1.8842	1387	1.8842	854	1.8842	627	1.8842	747
1.88725	1270	1.88725	931	1.88725	613	1.88725	714
1.89031	1375	1.89031	905	1.89031	639	1.89031	688
1.89336	1359	1.89336	874	1.89336	671	1.89336	693
1.89641	1341	1.89641	855	1.89641	570	1.89641	679
1.89947	1366	1.89947	940	1.89947	597	1.89947	662
1.90252	1332	1.90252	903	1.90252	562	1.90252	659
1.90558	1376	1.90558	896	1.90558	562	1.90558	639
1.90863	1327	1.90863	885	1.90863	578	1.90863	690
1.91168	1342	1.91168	890	1.91168	642	1.91168	662
1.91474	1292	1.91474	857	1.91474	572	1.91474	679
1.91779	1302	1.91779	924	1.91779	596	1.91779	715
1.92084	1352	1.92084	913	1.92084	581	1.92084	704
1.9239	1365	1.9239	867	1.9239	616	1.9239	717
1.92695	1387	1.92695	838	1.92695	586	1.92695	668
1.93001	1371	1.93001	955	1.93001	553	1.93001	645
1.93306	1312	1.93306	864	1.93306	564	1.93306	658
1.93611	1352	1.93611	858	1.93611	569	1.93611	704
1.93917	1322	1.93917	840	1.93917	612	1.93917	695
1.94222	1299	1.94222	870	1.94222	590	1.94222	667
1.94528	1284	1.94528	885	1.94528	557	1.94528	645
1.94833	1265	1.94833	871	1.94833	571	1.94833	636
1.95138	1332	1.95138	857	1.95138	607	1.95138	678
1.95444	1306	1.95444	910	1.95444	611	1.95444	644
1.95749	1324	1.95749	864	1.95749	556	1.95749	735
1.96054	1299	1.96054	920	1.96054	542	1.96054	673
1.9636	1264	1.9636	867	1.9636	551	1.9636	672
1.96665	1240	1.96665	900	1.96665	532	1.96665	698
1.96971	1254	1.96971	826	1.96971	583	1.96971	618
1.97276	1225	1.97276	848	1.97276	543	1.97276	663
1.97581	1288	1.97581	884	1.97581	590	1.97581	672
1.97887	1283	1.97887	850	1.97887	537	1.97887	659
1.98192	1302	1.98192	775	1.98192	531	1.98192	595
1.98497	1279	1.98497	837	1.98497	521	1.98497	634
1.98803	1291	1.98803	856	1.98803	516	1.98803	627
1.99108	1342	1.99108	853	1.99108	552	1.99108	649
1.99414	1261	1.99414	817	1.99414	569	1.99414	655
1.99719	1305	1.99719	864	1.99719	544	1.99719	661
2.00024	1226	2.00024	907	2.00024	542	2.00024	704
2.0033	1241	2.0033	836	2.0033	523	2.0033	631
2.00635	1231	2.00635	832	2.00635	534	2.00635	594
2.0094	1229	2.0094	824	2.0094	538	2.0094	655
2.01246	1218	2.01246	777	2.01246	539	2.01246	587
2.01551	1213	2.01551	808	2.01551	513	2.01551	623
2.01857	1206	2.01857	777	2.01857	508	2.01857	643
2.02162	1217	2.02162	819	2.02162	464	2.02162	594
2.02467	1203	2.02467	810	2.02467	540	2.02467	651
2.02773	1230	2.02773	834	2.02773	518	2.02773	591
2.03078	1230	2.03078	752	2.03078	548	2.03078	617
2.03384	1204	2.03384	812	2.03384	536	2.03384	596
2.03689	1205	2.03689	784	2.03689	520	2.03689	592
2.03994	1145	2.03994	808	2.03994	481	2.03994	575
2.043	1172	2.043	822	2.043	508	2.043	611
2.04605	1205	2.04605	760	2.04605	513	2.04605	597
2.0491	1083	2.0491	802	2.0491	504	2.0491	582
2.05216	1240	2.05216	689	2.05216	497	2.05216	548
2.05521	1174	2.05521	758	2.05521	475	2.05521	547
2.05827	1162	2.05827	769	2.05827	478	2.05827	547
2.06132	1087	2.06132	674	2.06132	484	2.06132	524
2.06437	1195	2.06437	736	2.06437	480	2.06437	571
2.06743	1117	2.06743	724	2.06743	486	2.06743	570
2.07048	1058	2.07048	723	2.07048	490	2.07048	596
2.07353	1142	2.07353	715	2.07353	465	2.07353	574
2.07659	1109	2.07659	764	2.07659	481	2.07659	608
2.07964	1111	2.07964	710	2.07964	461	2.07964	536
2.0827	1105	2.0827	735	2.0827	459	2.0827	561
2.08575	1115	2.08575	719	2.08575	478	2.08575	543
2.0888	1124	2.0888	733	2.0888	486	2.0888	542
2.09186	1065	2.09186	737	2.09186	465	2.09186	579
2.09491	1076	2.09491	695	2.09491	483	2.09491	582
2.09797	1049	2.09797	702	2.09797	461	2.09797	558
2.10102	1096	2.10102	684	2.10102	473	2.10102	496
2.10407	1060	2.10407	667	2.10407	426	2.10407	534
2.10713	1076	2.10713	631	2.10713	435	2.10713	540
2.11018	1068	2.11018	690	2.11018	429	2.11018	568
2.11323	1054	2.11323	696	2.11323	412	2.11323	551
2.11629	1034	2.11629	688	2.11629	447	2.11629	516
2.11934	1005	2.11934	671	2.11934	444	2.11934	494
2.1224	1011	2.1224	646	2.1224	415	2.1224	492
2.12545	1019	2.12545	651	2.12545	408	2.12545	541
2.1285	1024	2.1285	690	2.1285	428	2.1285	529
2.13156	1024	2.13156	659	2.13156	375	2.13156	516
2.13461	1086	2.13461	655	2.13461	432	2.13461	476
2.13766	1100	2.13766	702	2.13766	389	2.13766	464
2.14072	1034	2.14072	663	2.14072	398	2.14072	500
2.14377	1012	2.14377	637	2.14377	385	2.14377	479
2.14683	980	2.14683	620	2.14683	379	2.14683	500
2.14988	1002	2.14988	655	2.14988	415	2.14988	463
2.15293	956	2.15293	662	2.15293	374	2.15293	445
2.15599	981	2.15599	640	2.15599	383	2.15599	474
2.15904	901	2.15904	631	2.15904	411	2.15904	488
2.1621	990	2.1621	644	2.1621	399	2.1621	485
2.16515	947	2.16515	614	2.16515	388	2.16515	456
2.1682	974	2.1682	645	2.1682	413	2.1682	458
2.17126	927	2.17126	607	2.17126	357	2.17126	449
2.17431	911	2.17431	598	2.17431	416	2.17431	441
2.17736	942	2.17736	606	2.17736	345	2.17736	465
2.18042	897	2.18042	649	2.18042	370	2.18042	505
2.18347	990	2.18347	648	2.18347	364	2.18347	476
2.18653	938	2.18653	618	2.18653	341	2.18653	451
2.18958	916	2.18958	555	2.18958	361	2.18958	475
2.19263	958	2.19263	618	2.19263	354	2.19263	435
2.19569	855	2.19569	612	2.19569	366	2.19569	409
2.19874	905	2.19874	616	2.19874	334	2.19874	446
2.20179	884	2.20179	607	2.20179	387	2.20179	431
2.20485	894	2.20485	591	2.20485	384	2.20485	456
2.2079	881	2.2079	592	2.2079	360	2.2079	459
2.21096	964	2.21096	581	2.21096	357	2.21096	455
2.21401	927	2.21401	538	2.21401	384	2.21401	431
2.21706	855	2.21706	606	2.21706	345	2.21706	414
2.22012	880	2.22012	565	2.22012	366	2.22012	388
2.22317	852	2.22317	583	2.22317	351	2.22317	404
2.22623	845	2.22623	546	2.22623	355	2.22623	421
2.22928	932	2.22928	602	2.22928	338	2.22928	413
2.23233	866	2.23233	567	2.23233	334	2.23233	447
2.23539	852	2.23539	571	2.23539	290	2.23539	424
2.23844	852	2.23844	572	2.23844	320	2.23844	404
2.24149	827	2.24149	587	2.24149	374	2.24149	378
2.24455	893	2.24455	565	2.24455	363	2.24455	392
2.2476	845	2.2476	562	2.2476	333	2.2476	426
2.25066	875	2.25066	490	2.25066	352	2.25066	457
2.25371	816	2.25371	502	2.25371	329	2.25371	397
2.25676	890	2.25676	579	2.25676	320	2.25676	409
2.25982	892	2.25982	518	2.25982	356	2.25982	416
2.26287	844	2.26287	540	2.26287	320	2.26287	375
2.26592	868	2.26592	555	2.26592	353	2.26592	436
2.26898	832	2.26898	560	2.26898	337	2.26898	412
2.27203	817	2.27203	524	2.27203	350	2.27203	388
2.27509	890	2.27509	558	2.27509	333	2.27509	380
2.27814	837	2.27814	509	2.27814	346	2.27814	399
2.28119	840	2.28119	562	2.28119	296	2.28119	349
2.28425	805	2.28425	516	2.28425	310	2.28425	390
2.2873	801	2.2873	513	2.2873	316	2.2873	373
2.29036	847	2.29036	537	2.29036	320	2.29036	414
2.29341	822	2.29341	521	2.29341	349	2.29341	404
2.29646	857	2.29646	538	2.29646	360	2.29646	387
2.29952	845	2.29952	555	2.29952	283	2.29952	376
2.30257	802	2.30257	525	2.30257	345	2.30257	372
2.30562	831	2.30562	514	2.30562	295	2.30562	381
2.30868	820	2.30868	506	2.30868	290	2.30868	397
2.31173	803	2.31173	515	2.31173	307	2.31173	390
2.31479	817	2.31479	509	2.31479	308	2.31479	404
2.31784	791	2.31784	558	2.31784	310	2.31784	372
2.32089	764	2.32089	530	2.32089	306	2.32089	362
2.32395	775	2.32395	537	2.32395	325	2.32395	394
2.327	766	2.327	503	2.327	317	2.327	380
2.33005	760	2.33005	516	2.33005	314	2.33005	373
2.33311	829	2.33311	528	2.33311	292	2.33311	416
2.33616	753	2.33616	496	2.33616	298	2.33616	366
2.33922	796	2.33922	499	2.33922	295	2.33922	353
2.34227	773	2.34227	523	2.34227	309	2.34227	367
2.34532	791	2.34532	535	2.34532	315	2.34532	354
2.34838	816	2.34838	518	2.34838	343	2.34838	384
2.35143	822	2.35143	520	2.35143	283	2.35143	364
2.35449	739	2.35449	432	2.35449	307	2.35449	386
2.35754	788	2.35754	465	2.35754	305	2.35754	397
2.36059	767	2.36059	508	2.36059	322	2.36059	382
2.36365	818	2.36365	528	2.36365	304	2.36365	348
2.3667	774	2.3667	512	2.3667	309	2.3667	353
2.36975	743	2.36975	451	2.36975	286	2.36975	376
2.37281	768	2.37281	496	2.37281	298	2.37281	347
2.37586	758	2.37586	503	2.37586	272	2.37586	338
2.37892	779	2.37892	489	2.37892	288	2.37892	351
2.38197	750	2.38197	490	2.38197	326	2.38197	354
2.38502	726	2.38502	502	2.38502	267	2.38502	359
2.38808	772	2.38808	523	2.38808	243	2.38808	365
2.39113	712	2.39113	481	2.39113	273	2.39113	363
2.39418	775	2.39418	442	2.39418	255	2.39418	357
2.39724	709	2.39724	490	2.39724	290	2.39724	347
2.40029	760	2.40029	487	2.40029	250	2.40029	361
2.40335	735	2.40335	482	2.40335	294	2.40335	364
2.4064	722	2.4064	476	2.4064	268	2.4064	322
2.40945	783	2.40945	449	2.40945	279	2.40945	365
2.41251	660	2.41251	467	2.41251	262	2.41251	319
2.41556	679	2.41556	489	2.41556	266	2.41556	348
2.41862	748	2.41862	466	2.41862	310	2.41862	338
2.42167	748	2.42167	484	2.42167	302	2.42167	348
2.42472	718	2.42472	478	2.42472	254	2.42472	327
2.42778	701	2.42778	466	2.42778	264	2.42778	327
2.43083	713	2.43083	458	2.43083	292	2.43083	328
2.43388	747	2.43388	484	2.43388	297	2.43388	339
2.43694	701	2.43694	426	2.43694	273	2.43694	320
2.43999	699	2.43999	472	2.43999	290	2.43999	308
2.44305	690	2.44305	457	2.44305	271	2.44305	347
2.4461	704	2.4461	434	2.4461	273	2.4461	340
2.44915	711	2.44915	452	2.44915	259	2.44915	321
2.45221	733	2.45221	431	2.45221	263	2.45221	331
2.45526	705	2.45526	465	2.45526	250	2.45526	310
2.45831	665	2.45831	440	2.45831	251	2.45831	300
2.46137	698	2.46137	444	2.46137	256	2.46137	358
2.46442	672	2.46442	462	2.46442	284	2.46442	325
2.46748	677	2.46748	444	2.46748	250	2.46748	326
2.47053	623	2.47053	441	2.47053	240	2.47053	318
2.47358	638	2.47358	480	2.47358	276	2.47358	296
2.47664	688	2.47664	404	2.47664	246	2.47664	311
2.47969	647	2.47969	427	2.47969	259	2.47969	312
2.48275	662	2.48275	426	2.48275	281	2.48275	306
2.4858	655	2.4858	450	2.4858	284	2.4858	339
2.48885	647	2.48885	462	2.48885	239	2.48885	304
2.49191	718	2.49191	422	2.49191	251	2.49191	327
2.49496	654	2.49496	432	2.49496	233	2.49496	282
2.49801	689	2.49801	432	2.49801	252	2.49801	318
2.50107	686	2.50107	439	2.50107	252	2.50107	328
2.50412	638	2.50412	436	2.50412	231	2.50412	290
2.50718	624	2.50718	405	2.50718	232	2.50718	256
2.51023	652	2.51023	422	2.51023	191	2.51023	300
2.51328	678	2.51328	385	2.51328	245	2.51328	329
2.51634	682	2.51634	384	2.51634	249	2.51634	285
2.51939	681	2.51939	425	2.51939	253	2.51939	270
2.52244	678	2.52244	401	2.52244	233	2.52244	325
2.5255	598	2.5255	447	2.5255	251	2.5255	289
2.52855	650	2.52855	436	2.52855	203	2.52855	298
2.53161	677	2.53161	393	2.53161	250	2.53161	306
2.53466	644	2.53466	444	2.53466	220	2.53466	312
2.53771	597	2.53771	390	2.53771	220	2.53771	304
2.54077	633	2.54077	378	2.54077	204	2.54077	306
2.54382	595	2.54382	423	2.54382	217	2.54382	287
2.54688	660	2.54688	445	2.54688	231	2.54688	308
2.54993	636	2.54993	438	2.54993	243	2.54993	306
2.55298	616	2.55298	369	2.55298	230	2.55298	293
2.55604	632	2.55604	383	2.55604	232	2.55604	314
2.55909	634	2.55909	394	2.55909	221	2.55909	295
2.56214	649	2.56214	452	2.56214	220	2.56214	278
2.5652	610	2.5652	394	2.5652	212	2.5652	310
2.56825	600	2.56825	397	2.56825	229	2.56825	308
2.57131	635	2.57131	404	2.57131	229	2.57131	258
2.57436	578	2.57436	396	2.57436	203	2.57436	273
2.57741	556	2.57741	357	2.57741	216	2.57741	318
2.58047	627	2.58047	402	2.58047	233	2.58047	301
2.58352	602	2.58352	371	2.58352	223	2.58352	270
2.58657	570	2.58657	360	2.58657	233	2.58657	314
2.58963	582	2.58963	407	2.58963	226	2.58963	274
2.59268	615	2.59268	387	2.59268	226	2.59268	227
2.59574	596	2.59574	403	2.59574	245	2.59574	282
2.59879	588	2.59879	384	2.59879	210	2.59879	246
2.60184	583	2.60184	379	2.60184	220	2.60184	295
2.6049	595	2.6049	378	2.6049	213	2.6049	266
2.60795	579	2.60795	409	2.60795	203	2.60795	295
2.611	564	2.611	383	2.611	222	2.611	277
2.61406	593	2.61406	359	2.61406	185	2.61406	278
2.61711	587	2.61711	410	2.61711	194	2.61711	293
2.62017	595	2.62017	341	2.62017	209	2.62017	237
2.62322	624	2.62322	361	2.62322	228	2.62322	295
2.62627	557	2.62627	397	2.62627	211	2.62627	258
2.62933	566	2.62933	362	2.62933	225	2.62933	246
2.63238	540	2.63238	369	2.63238	234	2.63238	268
2.63544	570	2.63544	376	2.63544	202	2.63544	251
2.63849	634	2.63849	368	2.63849	236	2.63849	253
2.64154	604	2.64154	376	2.64154	194	2.64154	258
2.6446	595	2.6446	393	2.6446	197	2.6446	254
2.64765	589	2.64765	340	2.64765	210	2.64765	262
2.6507	594	2.6507	368	2.6507	197	2.6507	296
2.65376	548	2.65376	408	2.65376	244	2.65376	295
2.65681	559	2.65681	365	2.65681	200	2.65681	277
2.65987	558	2.65987	382	2.65987	210	2.65987	256
2.66292	579	2.66292	375	2.66292	185	2.66292	241
2.66597	553	2.66597	351	2.66597	211	2.66597	261
2.66903	563	2.66903	373	2.66903	202	2.66903	241
2.67208	580	2.67208	375	2.67208	166	2.67208	254
2.67513	564	2.67513	340	2.67513	212	2.67513	279
2.67819	527	2.67819	372	2.67819	199	2.67819	261
2.68124	590	2.68124	347	2.68124	203	2.68124	241
2.6843	551	2.6843	365	2.6843	219	2.6843	256
2.68735	582	2.68735	363	2.68735	232	2.68735	246
2.6904	575	2.6904	349	2.6904	191	2.6904	231
2.69346	568	2.69346	367	2.69346	208	2.69346	259
2.69651	583	2.69651	325	2.69651	196	2.69651	269
2.69957	579	2.69957	380	2.69957	200	2.69957	208
2.70262	512	2.70262	348	2.70262	159	2.70262	249
2.70567	544	2.70567	335	2.70567	174	2.70567	228
2.70873	507	2.70873	349	2.70873	195	2.70873	228
2.71178	526	2.71178	375	2.71178	202	2.71178	241
2.71483	541	2.71483	326	2.71483	216	2.71483	224
2.71789	525	2.71789	319	2.71789	183	2.71789	234
2.72094	569	2.72094	340	2.72094	199	2.72094	237
2.724	519	2.724	336	2.724	202	2.724	236
2.72705	527	2.72705	348	2.72705	196	2.72705	248
2.7301	545	2.7301	360	2.7301	191	2.7301	231
2.73316	545	2.73316	354	2.73316	197	2.73316	231
2.73621	515	2.73621	346	2.73621	169	2.73621	216
2.73926	535	2.73926	344	2.73926	168	2.73926	223
2.74232	511	2.74232	347	2.74232	178	2.74232	227
2.74537	524	2.74537	352	2.74537	181	2.74537	208
2.74843	509	2.74843	328	2.74843	174	2.74843	230
2.75148	544	2.75148	334	2.75148	188	2.75148	228
2.75453	527	2.75453	289	2.75453	174	2.75453	244
2.75759	497	2.75759	341	2.75759	192	2.75759	206
2.76064	485	2.76064	319	2.76064	164	2.76064	229
2.7637	458	2.7637	318	2.7637	189	2.7637	230
2.76675	457	2.76675	331	2.76675	173	2.76675	215
2.7698	520	2.7698	336	2.7698	218	2.7698	229
2.77286	480	2.77286	340	2.77286	156	2.77286	235
2.77591	492	2.77591	345	2.77591	159	2.77591	207
2.77896	509	2.77896	342	2.77896	185	2.77896	234
2.78202	459	2.78202	325	2.78202	210	2.78202	233
2.78507	492	2.78507	310	2.78507	189	2.78507	231
2.78813	487	2.78813	325	2.78813	211	2.78813	210
2.79118	473	2.79118	321	2.79118	167	2.79118	237
2.79423	493	2.79423	330	2.79423	182	2.79423	219
2.79729	471	2.79729	305	2.79729	174	2.79729	211
2.80034	432	2.80034	339	2.80034	172	2.80034	214
2.80339	463	2.80339	313	2.80339	171	2.80339	215
2.80645	504	2.80645	298	2.80645	157	2.80645	211
2.8095	443	2.8095	323	2.8095	189	2.8095	206
2.81256	467	2.81256	337	2.81256	182	2.81256	233
2.81561	438	2.81561	325	2.81561	179	2.81561	218
2.81866	505	2.81866	314	2.81866	176	2.81866	187
2.82172	439	2.82172	303	2.82172	177	2.82172	191
2.82477	467	2.82477	362	2.82477	168	2.82477	197
2.82783	486	2.82783	315	2.82783	183	2.82783	226
2.83088	470	2.83088	314	2.83088	177	2.83088	199
2.83393	477	2.83393	311	2.83393	155	2.83393	213
2.83699	456	2.83699	324	2.83699	178	2.83699	214
2.84004	463	2.84004	313	2.84004	160	2.84004	215
2.84309	440	2.84309	306	2.84309	163	2.84309	219
2.84615	444	2.84615	323	2.84615	151	2.84615	207
2.8492	454	2.8492	259	2.8492	149	2.8492	173
2.85226	446	2.85226	279	2.85226	158	2.85226	185
2.85531	459	2.85531	278	2.85531	134	2.85531	195
2.85836	473	2.85836	326	2.85836	157	2.85836	220
2.86142	456	2.86142	257	2.86142	153	2.86142	186
2.86447	468	2.86447	304	2.86447	158	2.86447	204
2.86752	424	2.86752	317	2.86752	153	2.86752	200
2.87058	440	2.87058	273	2.87058	143	2.87058	214
2.87363	474	2.87363	288	2.87363	133	2.87363	186
2.87669	464	2.87669	287	2.87669	157	2.87669	197
2.87974	441	2.87974	292	2.87974	155	2.87974	191
2.88279	422	2.88279	286	2.88279	156	2.88279	181
2.88585	445	2.88585	273	2.88585	172	2.88585	185
2.8889	424	2.8889	281	2.8889	152	2.8889	189
2.89196	444	2.89196	266	2.89196	134	2.89196	189
2.89501	424	2.89501	280	2.89501	149	2.89501	166
2.89806	421	2.89806	289	2.89806	159	2.89806	193
2.90112	441	2.90112	288	2.90112	162	2.90112	175
2.90417	399	2.90417	279	2.90417	134	2.90417	172
2.90722	419	2.90722	299	2.90722	176	2.90722	209
2.91028	412	2.91028	302	2.91028	156	2.91028	205
2.91333	415	2.91333	321	2.91333	168	2.91333	180
2.91639	413	2.91639	290	2.91639	170	2.91639	187
2.91944	444	2.91944	270	2.91944	156	2.91944	180
2.92249	438	2.92249	289	2.92249	140	2.92249	204
2.92555	422	2.92555	248	2.92555	131	2.92555	197
2.9286	442	2.9286	301	2.9286	135	2.9286	179
2.93165	439	2.93165	296	2.93165	153	2.93165	191
2.93471	447	2.93471	273	2.93471	151	2.93471	186
2.93776	404	2.93776	290	2.93776	150	2.93776	181
2.94082	385	2.94082	247	2.94082	146	2.94082	165
2.94387	413	2.94387	273	2.94387	150	2.94387	163
2.94692	406	2.94692	251	2.94692	137	2.94692	178
2.94998	418	2.94998	267	2.94998	143	2.94998	170
2.95303	377	2.95303	263	2.95303	140	2.95303	204
2.95609	437	2.95609	297	2.95609	160	2.95609	203
2.95914	380	2.95914	266	2.95914	145	2.95914	154
2.96219	401	2.96219	292	2.96219	154	2.96219	166
2.96525	376	2.96525	291	2.96525	139	2.96525	156
2.9683	390	2.9683	259	2.9683	137	2.9683	187
2.97135	407	2.97135	263	2.97135	124	2.97135	166
2.97441	407	2.97441	263	2.97441	152	2.97441	174
2.97746	395	2.97746	283	2.97746	157	2.97746	196
2.98052	418	2.98052	279	2.98052	131	2.98052	182
2.98357	401	2.98357	211	2.98357	132	2.98357	185
2.98662	414	2.98662	305	2.98662	148	2.98662	171
2.98968	382	2.98968	305	2.98968	132	2.98968	187
2.99273	399	2.99273	266	2.99273	151	2.99273	172
2.99578	401	2.99578	291	2.99578	111	2.99578	172
2.99884	410	2.99884	232	2.99884	154	2.99884	161
3.00189	423	3.00189	304	3.00189	112	3.00189	179
3.00495	386	3.00495	302	3.00495	146	3.00495	166
3.008	415	3.008	250	3.008	134	3.008	199
3.01105	409	3.01105	300	3.01105	128	3.01105	172
3.01411	393	3.01411	257	3.01411	141	3.01411	175
3.01716	419	3.01716	271	3.01716	136	3.01716	183
3.02022	420	3.02022	254	3.02022	137	3.02022	154
3.02327	403	3.02327	265	3.02327	151	3.02327	163
3.02632	410	3.02632	271	3.02632	116	3.02632	163
3.02938	396	3.02938	271	3.02938	141	3.02938	181
3.03243	386	3.03243	279	3.03243	132	3.03243	166
3.03548	385	3.03548	264	3.03548	117	3.03548	155
3.03854	407	3.03854	275	3.03854	129	3.03854	156
3.04159	381	3.04159	281	3.04159	125	3.04159	164
3.04465	401	3.04465	237	3.04465	127	3.04465	164
3.0477	404	3.0477	256	3.0477	147	3.0477	158
3.05075	391	3.05075	263	3.05075	126	3.05075	177
3.05381	414	3.05381	243	3.05381	119	3.05381	158
3.05686	363	3.05686	236	3.05686	130	3.05686	172
3.05991	375	3.05991	237	3.05991	118	3.05991	177
3.06297	334	3.06297	243	3.06297	124	3.06297	159
3.06602	398	3.06602	257	3.06602	140	3.06602	165
3.06908	382	3.06908	250	3.06908	114	3.06908	169
3.07213	327	3.07213	278	3.07213	149	3.07213	157
3.07518	351	3.07518	272	3.07518	118	3.07518	153
3.07824	383	3.07824	233	3.07824	128	3.07824	181
3.08129	361	3.08129	254	3.08129	153	3.08129	153
3.08435	376	3.08435	246	3.08435	125	3.08435	162
3.0874	407	3.0874	240	3.0874	145	3.0874	172
3.09045	399	3.09045	240	3.09045	113	3.09045	174
3.09351	368	3.09351	247	3.09351	116	3.09351	157
3.09656	407	3.09656	243	3.09656	111	3.09656	166
3.09961	390	3.09961	257	3.09961	113	3.09961	143
3.10267	369	3.10267	277	3.10267	134	3.10267	147
3.10572	353	3.10572	231	3.10572	118	3.10572	149
3.10878	358	3.10878	258	3.10878	146	3.10878	140
3.11183	312	3.11183	212	3.11183	135	3.11183	146
3.11488	357	3.11488	272	3.11488	133	3.11488	154
3.11794	358	3.11794	232	3.11794	113	3.11794	172
3.12099	371	3.12099	234	3.12099	127	3.12099	160
3.12404	342	3.12404	221	3.12404	122	3.12404	172
3.1271	354	3.1271	246	3.1271	127	3.1271	140
3.13015	346	3.13015	253	3.13015	111	3.13015	161
3.13321	385	3.13321	227	3.13321	135	3.13321	170
3.13626	339	3.13626	255	3.13626	122	3.13626	154
3.13931	359	3.13931	236	3.13931	125	3.13931	164
3.14237	352	3.14237	244	3.14237	128	3.14237	142
3.14542	352	3.14542	242	3.14542	116	3.14542	146
3.14847	368	3.14847	267	3.14847	117	3.14847	156
3.15153	349	3.15153	256	3.15153	115	3.15153	180
3.15458	377	3.15458	246	3.15458	120	3.15458	158
3.15764	387	3.15764	247	3.15764	136	3.15764	129
3.16069	337	3.16069	237	3.16069	146	3.16069	148
3.16374	361	3.16374	221	3.16374	121	3.16374	137
3.1668	375	3.1668	242	3.1668	130	3.1668	132
3.16985	311	3.16985	231	3.16985	120	3.16985	164
3.17291	356	3.17291	224	3.17291	121	3.17291	141
3.17596	318	3.17596	215	3.17596	120	3.17596	142
3.17901	321	3.17901	232	3.17901	113	3.17901	138
3.18207	327	3.18207	227	3.18207	87	3.18207	135
3.18512	348	3.18512	225	3.18512	119	3.18512	130
3.18817	366	3.18817	228	3.18817	128	3.18817	139
3.19123	338	3.19123	256	3.19123	100	3.19123	170
3.19428	351	3.19428	233	3.19428	125	3.19428	155
3.19734	339	3.19734	212	3.19734	104	3.19734	150
3.20039	327	3.20039	205	3.20039	114	3.20039	135
3.20344	344	3.20344	233	3.20344	121	3.20344	140
3.2065	324	3.2065	226	3.2065	126	3.2065	148
3.20955	317	3.20955	234	3.20955	107	3.20955	140
3.2126	326	3.2126	214	3.2126	117	3.2126	138
3.21566	304	3.21566	217	3.21566	98	3.21566	162
3.21871	310	3.21871	243	3.21871	119	3.21871	136
3.22177	321	3.22177	224	3.22177	111	3.22177	146
3.22482	314	3.22482	202	3.22482	128	3.22482	137
3.22787	323	3.22787	218	3.22787	122	3.22787	131
3.23093	334	3.23093	229	3.23093	106	3.23093	142
3.23398	308	3.23398	206	3.23398	132	3.23398	157
3.23704	359	3.23704	220	3.23704	99	3.23704	134
3.24009	346	3.24009	230	3.24009	120	3.24009	123
3.24314	322	3.24314	237	3.24314	104	3.24314	134
3.2462	309	3.2462	216	3.2462	107	3.2462	145
3.24925	329	3.24925	219	3.24925	119	3.24925	136
3.2523	302	3.2523	225	3.2523	109	3.2523	140
3.25536	323	3.25536	230	3.25536	99	3.25536	134
3.25841	300	3.25841	214	3.25841	115	3.25841	142
3.26147	335	3.26147	218	3.26147	104	3.26147	146
3.26452	301	3.26452	234	3.26452	114	3.26452	128
3.26757	294	3.26757	228	3.26757	101	3.26757	142
3.27063	325	3.27063	210	3.27063	120	3.27063	124
3.27368	307	3.27368	208	3.27368	120	3.27368	114
3.27673	313	3.27673	236	3.27673	109	3.27673	144
3.27979	318	3.27979	215	3.27979	104	3.27979	133
3.28284	322	3.28284	216	3.28284	101	3.28284	119
3.2859	319	3.2859	224	3.2859	99	3.2859	125
3.28895	313	3.28895	217	3.28895	98	3.28895	130
3.292	317	3.292	226	3.292	115	3.292	144
3.29506	328	3.29506	193	3.29506	105	3.29506	136
3.29811	264	3.29811	222	3.29811	102	3.29811	130
3.30117	276	3.30117	202	3.30117	108	3.30117	148
3.30422	263	3.30422	219	3.30422	106	3.30422	130
3.30727	309	3.30727	197	3.30727	111	3.30727	121
3.31033	322	3.31033	208	3.31033	114	3.31033	144
3.31338	294	3.31338	193	3.31338	96	3.31338	97
3.31643	288	3.31643	213	3.31643	101	3.31643	124
3.31949	323	3.31949	207	3.31949	100	3.31949	122
3.32254	281	3.32254	221	3.32254	107	3.32254	127
3.3256	284	3.3256	211	3.3256	113	3.3256	137
3.32865	321	3.32865	194	3.32865	86	3.32865	122
3.3317	294	3.3317	197	3.3317	114	3.3317	126
3.33476	301	3.33476	236	3.33476	118	3.33476	125
3.33781	259	3.33781	204	3.33781	106	3.33781	140
3.34086	270	3.34086	218	3.34086	109	3.34086	101
3.34392	316	3.34392	219	3.34392	97	3.34392	128
3.34697	301	3.34697	201	3.34697	104	3.34697	128
3.35003	289	3.35003	194	3.35003	114	3.35003	123
3.35308	272	3.35308	211	3.35308	104	3.35308	122
3.35613	302	3.35613	215	3.35613	95	3.35613	151
3.35919	297	3.35919	196	3.35919	102	3.35919	134
3.36224	285	3.36224	217	3.36224	86	3.36224	120
3.3653	294	3.3653	213	3.3653	118	3.3653	110
3.36835	263	3.36835	168	3.36835	98	3.36835	112
3.3714	284	3.3714	168	3.3714	101	3.3714	135
3.37446	276	3.37446	191	3.37446	114	3.37446	108
3.37751	268	3.37751	175	3.37751	86	3.37751	129
3.38056	289	3.38056	178	3.38056	98	3.38056	130
3.38362	294	3.38362	207	3.38362	101	3.38362	114
3.38667	265	3.38667	176	3.38667	102	3.38667	124
3.38973	255	3.38973	208	3.38973	103	3.38973	135
3.39278	267	3.39278	190	3.39278	92	3.39278	108
3.39583	249	3.39583	206	3.39583	103	3.39583	116
3.39889	292	3.39889	175	3.39889	112	3.39889	118
3.40194	282	3.40194	177	3.40194	108	3.40194	134
3.40499	290	3.40499	190	3.40499	98	3.40499	99
3.40805	287	3.40805	206	3.40805	102	3.40805	123
3.4111	269	3.4111	183	3.4111	100	3.4111	115
3.41416	286	3.41416	170	3.41416	98	3.41416	117
3.41721	249	3.41721	180	3.41721	98	3.41721	129
3.42026	256	3.42026	185	3.42026	78	3.42026	116
3.42332	264	3.42332	201	3.42332	93	3.42332	116
3.42637	261	3.42637	170	3.42637	83	3.42637	119
3.42943	264	3.42943	166	3.42943	86	3.42943	118
3.43248	276	3.43248	172	3.43248	102	3.43248	113
3.43553	286	3.43553	194	3.43553	95	3.43553	104
3.43859	250	3.43859	188	3.43859	85	3.43859	122
3.44164	248	3.44164	193	3.44164	88	3.44164	118
3.44469	278	3.44469	216	3.44469	85	3.44469	91
3.44775	267	3.44775	185	3.44775	76	3.44775	106
3.4508	267	3.4508	173	3.4508	104	3.4508	117
3.45386	245	3.45386	173	3.45386	95	3.45386	115
3.45691	269	3.45691	172	3.45691	87	3.45691	111
3.45996	288	3.45996	176	3.45996	74	3.45996	106
3.46302	230	3.46302	171	3.46302	86	3.46302	96
3.46607	289	3.46607	189	3.46607	90	3.46607	102
3.46912	266	3.46912	183	3.46912	87	3.46912	90
3.47218	249	3.47218	179	3.47218	82	3.47218	107
3.47523	256	3.47523	181	3.47523	89	3.47523	111
3.47829	250	3.47829	179	3.47829	75	3.47829	116
3.48134	253	3.48134	179	3.48134	76	3.48134	103
3.48439	250	3.48439	163	3.48439	83	3.48439	109
3.48745	277	3.48745	172	3.48745	73	3.48745	117
3.4905	260	3.4905	188	3.4905	80	3.4905	102
3.49356	263	3.49356	169	3.49356	93	3.49356	109
3.49661	256	3.49661	207	3.49661	95	3.49661	119
3.49966	251	3.49966	179	3.49966	78	3.49966	120
3.50272	243	3.50272	175	3.50272	89	3.50272	86
3.50577	268	3.50577	191	3.50577	88	3.50577	105
3.50882	242	3.50882	174	3.50882	83	3.50882	106
3.51188	251	3.51188	146	3.51188	100	3.51188	113
3.51493	232	3.51493	177	3.51493	75	3.51493	113
3.51799	230	3.51799	176	3.51799	76	3.51799	103
3.52104	237	3.52104	150	3.52104	83	3.52104	106
3.52409	234	3.52409	177	3.52409	80	3.52409	100
3.52715	267	3.52715	155	3.52715	88	3.52715	110
3.5302	259	3.5302	163	3.5302	102	3.5302	99
3.53325	254	3.53325	157	3.53325	80	3.53325	112
3.53631	250	3.53631	161	3.53631	70	3.53631	108
3.53936	253	3.53936	190	3.53936	71	3.53936	97
3.54242	239	3.54242	188	3.54242	82	3.54242	112
3.54547	260	3.54547	160	3.54547	75	3.54547	91
3.54852	242	3.54852	179	3.54852	75	3.54852	103
3.55158	225	3.55158	178	3.55158	90	3.55158	112
3.55463	279	3.55463	194	3.55463	74	3.55463	81
3.55769	265	3.55769	154	3.55769	99	3.55769	99
3.56074	217	3.56074	181	3.56074	97	3.56074	94
3.56379	248	3.56379	185	3.56379	68	3.56379	92
3.56685	243	3.56685	190	3.56685	77	3.56685	124
3.5699	245	3.5699	153	3.5699	93	3.5699	85
3.57295	237	3.57295	163	3.57295	91	3.57295	89
3.57601	225	3.57601	180	3.57601	80	3.57601	98
3.57906	243	3.57906	158	3.57906	85	3.57906	91
3.58212	218	3.58212	161	3.58212	79	3.58212	106
3.58517	247	3.58517	170	3.58517	75	3.58517	105
3.58822	257	3.58822	171	3.58822	76	3.58822	101
3.59128	221	3.59128	166	3.59128	91	3.59128	94
3.59433	240	3.59433	163	3.59433	69	3.59433	96
3.59738	211	3.59738	165	3.59738	71	3.59738	99
3.60044	221	3.60044	166	3.60044	78	3.60044	91
3.60349	202	3.60349	168	3.60349	66	3.60349	79
3.60655	225	3.60655	180	3.60655	84	3.60655	107
3.6096	227	3.6096	151	3.6096	82	3.6096	97
3.61265	235	3.61265	167	3.61265	88	3.61265	97
3.61571	253	3.61571	169	3.61571	103	3.61571	83
3.61876	237	3.61876	157	3.61876	100	3.61876	106
3.62182	241	3.62182	190	3.62182	85	3.62182	93
3.62487	230	3.62487	183	3.62487	90	3.62487	92
3.62792	234	3.62792	149	3.62792	79	3.62792	87
3.63098	221	3.63098	151	3.63098	81	3.63098	94
3.63403	257	3.63403	159	3.63403	78	3.63403	85
3.63708	216	3.63708	176	3.63708	81	3.63708	114
3.64014	230	3.64014	164	3.64014	86	3.64014	104
3.64319	216	3.64319	181	3.64319	83	3.64319	94
3.64625	255	3.64625	175	3.64625	74	3.64625	107
3.6493	216	3.6493	168	3.6493	82	3.6493	82
3.65235	232	3.65235	158	3.65235	80	3.65235	82
3.65541	224	3.65541	168	3.65541	73	3.65541	109
3.65846	244	3.65846	170	3.65846	85	3.65846	99
3.66151	216	3.66151	192	3.66151	73	3.66151	88
3.66457	232	3.66457	188	3.66457	85	3.66457	108
3.66762	218	3.66762	168	3.66762	69	3.66762	99
3.67068	229	3.67068	189	3.67068	83	3.67068	77
3.67373	212	3.67373	150	3.67373	83	3.67373	109
3.67678	235	3.67678	166	3.67678	79	3.67678	84
3.67984	213	3.67984	164	3.67984	74	3.67984	92
3.68289	219	3.68289	141	3.68289	82	3.68289	103
3.68594	232	3.68594	169	3.68594	59	3.68594	117
3.689	220	3.689	155	3.689	75	3.689	87
3.69205	207	3.69205	167	3.69205	77	3.69205	87
3.69511	213	3.69511	168	3.69511	94	3.69511	72
3.69816	211	3.69816	146	3.69816	80	3.69816	88
3.70121	212	3.70121	169	3.70121	63	3.70121	77
3.70427	225	3.70427	158	3.70427	79	3.70427	97
3.70732	227	3.70732	174	3.70732	87	3.70732	96
3.71038	190	3.71038	185	3.71038	72	3.71038	100
3.71343	207	3.71343	160	3.71343	62	3.71343	113
3.71648	199	3.71648	169	3.71648	76	3.71648	95
3.71954	224	3.71954	174	3.71954	91	3.71954	100
3.72259	220	3.72259	151	3.72259	62	3.72259	82
3.72564	231	3.72564	154	3.72564	74	3.72564	103
3.7287	210	3.7287	166	3.7287	81	3.7287	86
3.73175	235	3.73175	172	3.73175	77	3.73175	96
3.73481	216	3.73481	142	3.73481	75	3.73481	90
3.73786	190	3.73786	141	3.73786	72	3.73786	109
3.74091	221	3.74091	144	3.74091	75	3.74091	93
3.74397	222	3.74397	149	3.74397	83	3.74397	90
3.74702	203	3.74702	176	3.74702	71	3.74702	101
3.75007	214	3.75007	145	3.75007	78	3.75007	84
3.75313	228	3.75313	142	3.75313	87	3.75313	102
3.75618	202	3.75618	180	3.75618	71	3.75618	95
3.75924	225	3.75924	162	3.75924	62	3.75924	74
3.76229	205	3.76229	154	3.76229	72	3.76229	81
3.76534	211	3.76534	143	3.76534	64	3.76534	84
3.7684	223	3.7684	153	3.7684	65	3.7684	87
3.77145	206	3.77145	154	3.77145	79	3.77145	68
3.77451	210	3.77451	168	3.77451	74	3.77451	91
3.77756	211	3.77756	142	3.77756	84	3.77756	94
3.78061	218	3.78061	144	3.78061	74	3.78061	84
3.78367	213	3.78367	160	3.78367	62	3.78367	94
3.78672	211	3.78672	140	3.78672	72	3.78672	94
3.78977	183	3.78977	162	3.78977	71	3.78977	95
3.79283	183	3.79283	149	3.79283	81	3.79283	83
3.79588	192	3.79588	159	3.79588	76	3.79588	75
3.79894	248	3.79894	131	3.79894	72	3.79894	100
3.80199	210	3.80199	154	3.80199	65	3.80199	98
3.80504	200	3.80504	180	3.80504	64	3.80504	83
3.8081	217	3.8081	160	3.8081	68	3.8081	97
3.81115	207	3.81115	152	3.81115	51	3.81115	95
3.8142	186	3.8142	146	3.8142	63	3.8142	100
3.81726	193	3.81726	158	3.81726	66	3.81726	71
3.82031	205	3.82031	150	3.82031	59	3.82031	89
3.82337	201	3.82337	167	3.82337	74	3.82337	70
3.82642	187	3.82642	166	3.82642	70	3.82642	80
3.82947	215	3.82947	152	3.82947	62	3.82947	89
3.83253	224	3.83253	142	3.83253	61	3.83253	78
3.83558	211	3.83558	127	3.83558	65	3.83558	89
3.83864	188	3.83864	118	3.83864	65	3.83864	80
3.84169	192	3.84169	153	3.84169	64	3.84169	77
3.84474	215	3.84474	148	3.84474	67	3.84474	72
3.8478	199	3.8478	154	3.8478	90	3.8478	88
3.85085	184	3.85085	151	3.85085	72	3.85085	82
3.8539	207	3.8539	152	3.8539	64	3.8539	78
3.85696	212	3.85696	169	3.85696	77	3.85696	86
3.86001	181	3.86001	131	3.86001	77	3.86001	80
3.86307	198	3.86307	128	3.86307	60	3.86307	72
3.86612	190	3.86612	155	3.86612	77	3.86612	92
3.86917	215	3.86917	143	3.86917	63	3.86917	68
3.87223	176	3.87223	130	3.87223	60	3.87223	70
3.87528	190	3.87528	155	3.87528	63	3.87528	96
3.87833	208	3.87833	151	3.87833	62	3.87833	79
3.88139	201	3.88139	117	3.88139	77	3.88139	79
3.88444	194	3.88444	125	3.88444	60	3.88444	73
3.8875	188	3.8875	153	3.8875	60	3.8875	83
3.89055	193	3.89055	133	3.89055	62	3.89055	81
3.8936	175	3.8936	142	3.8936	60	3.8936	75
3.89666	194	3.89666	123	3.89666	65	3.89666	86
3.89971	211	3.89971	156	3.89971	52	3.89971	62
3.90277	178	3.90277	138	3.90277	62	3.90277	73
3.90582	173	3.90582	116	3.90582	61	3.90582	80
3.90887	220	3.90887	165	3.90887	84	3.90887	80
3.91193	191	3.91193	170	3.91193	71	3.91193	56
3.91498	181	3.91498	156	3.91498	67	3.91498	75
3.91803	190	3.91803	136	3.91803	65	3.91803	64
3.92109	196	3.92109	131	3.92109	71	3.92109	84
3.92414	189	3.92414	142	3.92414	73	3.92414	74
3.9272	180	3.9272	114	3.9272	60	3.9272	68
3.93025	192	3.93025	140	3.93025	54	3.93025	89
3.9333	183	3.9333	142	3.9333	63	3.9333	71
3.93636	179	3.93636	162	3.93636	63	3.93636	71
3.93941	191	3.93941	143	3.93941	64	3.93941	79
3.94246	187	3.94246	138	3.94246	75	3.94246	78
3.94552	178	3.94552	131	3.94552	64	3.94552	77
3.94857	205	3.94857	113	3.94857	79	3.94857	97
3.95163	147	3.95163	144	3.95163	62	3.95163	76
3.95468	158	3.95468	145	3.95468	67	3.95468	78
3.95773	185	3.95773	137	3.95773	69	3.95773	85
3.96079	202	3.96079	138	3.96079	61	3.96079	68
3.96384	185	3.96384	110	3.96384	74	3.96384	68
3.9669	197	3.9669	111	3.9669	59	3.9669	75
3.96995	158	3.96995	139	3.96995	64	3.96995	78
3.973	189	3.973	130	3.973	57	3.973	92
3.97606	175	3.97606	136	3.97606	67	3.97606	83
3.97911	187	3.97911	142	3.97911	63	3.97911	79
3.98216	190	3.98216	138	3.98216	56	3.98216	78
3.98522	173	3.98522	138	3.98522	54	3.98522	67
3.98827	185	3.98827	134	3.98827	69	3.98827	74
3.99133	195	3.99133	138	3.99133	76	3.99133	63
3.99438	166	3.99438	126	3.99438	67	3.99438	72
3.99743	198	3.99743	114	3.99743	71	3.99743	67
4.00049	177	4.00049	137	4.00049	55	4.00049	77
4.00354	183	4.00354	127	4.00354	63	4.00354	82
4.00659	177	4.00659	134	4.00659	66	4.00659	68
4.00965	174	4.00965	138	4.00965	64	4.00965	73
4.0127	178	4.0127	144	4.0127	52	4.0127	78
4.01576	147	4.01576	118	4.01576	65	4.01576	74
4.01881	157	4.01881	128	4.01881	54	4.01881	67
4.02186	184	4.02186	139	4.02186	71	4.02186	66
4.02492	179	4.02492	137	4.02492	59	4.02492	65
4.02797	167	4.02797	105	4.02797	77	4.02797	51
4.03103	171	4.03103	116	4.03103	51	4.03103	86
4.03408	167	4.03408	119	4.03408	58	4.03408	65
4.03713	187	4.03713	150	4.03713	64	4.03713	73
4.04019	183	4.04019	141	4.04019	66	4.04019	68
4.04324	178	4.04324	119	4.04324	59	4.04324	90
4.04629	200	4.04629	157	4.04629	61	4.04629	66
4.04935	153	4.04935	141	4.04935	60	4.04935	66
4.0524	153	4.0524	131	4.0524	61	4.0524	75
4.05546	165	4.05546	127	4.05546	69	4.05546	72
4.05851	156	4.05851	132	4.05851	70	4.05851	78
4.06156	170	4.06156	129	4.06156	45	4.06156	62
4.06462	176	4.06462	113	4.06462	55	4.06462	84
4.06767	194	4.06767	124	4.06767	67	4.06767	65
4.07072	175	4.07072	117	4.07072	70	4.07072	73
4.07378	174	4.07378	133	4.07378	58	4.07378	83
4.07683	187	4.07683	131	4.07683	57	4.07683	74
4.07989	166	4.07989	114	4.07989	46	4.07989	70
4.08294	176	4.08294	116	4.08294	46	4.08294	73
4.08599	168	4.08599	142	4.08599	63	4.08599	65
4.08905	189	4.08905	134	4.08905	54	4.08905	78
4.0921	162	4.0921	153	4.0921	67	4.0921	72
4.09516	181	4.09516	136	4.09516	54	4.09516	67
4.09821	169	4.09821	128	4.09821	60	4.09821	63
4.10126	159	4.10126	138	4.10126	69	4.10126	70
4.10432	155	4.10432	124	4.10432	66	4.10432	64
4.10737	169	4.10737	125	4.10737	56	4.10737	64
4.11042	154	4.11042	119	4.11042	50	4.11042	80
4.11348	182	4.11348	127	4.11348	56	4.11348	72
4.11653	161	4.11653	129	4.11653	59	4.11653	63
4.11959	166	4.11959	126	4.11959	52	4.11959	76
4.12264	178	4.12264	108	4.12264	57	4.12264	70
4.12569	162	4.12569	126	4.12569	64	4.12569	73
4.12875	163	4.12875	130	4.12875	52	4.12875	63
4.1318	173	4.1318	127	4.1318	53	4.1318	58
4.13485	173	4.13485	113	4.13485	67	4.13485	66
4.13791	171	4.13791	127	4.13791	47	4.13791	73
4.14096	180	4.14096	135	4.14096	60	4.14096	67
4.14402	174	4.14402	120	4.14402	47	4.14402	57
4.14707	157	4.14707	119	4.14707	61	4.14707	66
4.15012	162	4.15012	144	4.15012	50	4.15012	78
4.15318	170	4.15318	137	4.15318	65	4.15318	73
4.15623	177	4.15623	114	4.15623	61	4.15623	56
4.15929	160	4.15929	137	4.15929	56	4.15929	77
4.16234	166	4.16234	122	4.16234	51	4.16234	65
4.16539	161	4.16539	141	4.16539	74	4.16539	57
4.16845	150	4.16845	110	4.16845	64	4.16845	72
4.1715	158	4.1715	114	4.1715	58	4.1715	52
4.17455	154	4.17455	112	4.17455	61	4.17455	66
4.17761	139	4.17761	120	4.17761	60	4.17761	74
4.18066	144	4.18066	131	4.18066	46	4.18066	67
4.18372	171	4.18372	123	4.18372	65	4.18372	50
4.18677	155	4.18677	113	4.18677	58	4.18677	65
4.18982	167	4.18982	116	4.18982	55	4.18982	70
4.19288	165	4.19288	135	4.19288	61	4.19288	62
4.19593	143	4.19593	110	4.19593	56	4.19593	67
4.19898	154	4.19898	129	4.19898	63	4.19898	66
4.20204	160	4.20204	104	4.20204	57	4.20204	57
4.20509	163	4.20509	120	4.20509	55	4.20509	51
4.20815	156	4.20815	121	4.20815	48	4.20815	64
4.2112	152	4.2112	152	4.2112	67	4.2112	63
4.21425	184	4.21425	101	4.21425	40	4.21425	52
4.21731	140	4.21731	92	4.21731	59	4.21731	54
4.22036	158	4.22036	107	4.22036	54	4.22036	61
4.22342	136	4.22342	124	4.22342	58	4.22342	49
4.22647	147	4.22647	119	4.22647	49	4.22647	60
4.22952	141	4.22952	127	4.22952	67	4.22952	59
4.23258	166	4.23258	117	4.23258	52	4.23258	69
4.23563	147	4.23563	97	4.23563	48	4.23563	79
4.23868	163	4.23868	141	4.23868	46	4.23868	78
4.24174	135	4.24174	107	4.24174	51	4.24174	65
4.24479	163	4.24479	124	4.24479	43	4.24479	66
4.24785	126	4.24785	138	4.24785	56	4.24785	63
4.2509	163	4.2509	88	4.2509	53	4.2509	64
4.25395	157	4.25395	126	4.25395	57	4.25395	57
4.25701	145	4.25701	140	4.25701	55	4.25701	46
4.26006	163	4.26006	131	4.26006	47	4.26006	72
4.26311	146	4.26311	120	4.26311	52	4.26311	58
4.26617	164	4.26617	117	4.26617	43	4.26617	67
4.26922	128	4.26922	116	4.26922	51	4.26922	76
4.27228	166	4.27228	98	4.27228	52	4.27228	54
4.27533	149	4.27533	111	4.27533	50	4.27533	50
4.27838	150	4.27838	135	4.27838	45	4.27838	49
4.28144	156	4.28144	100	4.28144	58	4.28144	69
4.28449	176	4.28449	108	4.28449	64	4.28449	52
4.28754	140	4.28754	119	4.28754	56	4.28754	67
4.2906	139	4.2906	98	4.2906	61	4.2906	56
4.29365	157	4.29365	109	4.29365	52	4.29365	64
4.29671	150	4.29671	96	4.29671	54	4.29671	78
4.29976	138	4.29976	108	4.29976	53	4.29976	73
4.30281	146	4.30281	105	4.30281	54	4.30281	75
4.30587	159	4.30587	116	4.30587	39	4.30587	71
4.30892	160	4.30892	124	4.30892	64	4.30892	60
4.31198	141	4.31198	129	4.31198	63	4.31198	58
4.31503	148	4.31503	121	4.31503	49	4.31503	67
4.31808	143	4.31808	128	4.31808	57	4.31808	63
4.32114	143	4.32114	115	4.32114	50	4.32114	79
4.32419	139	4.32419	122	4.32419	52	4.32419	63
4.32724	130	4.32724	105	4.32724	50	4.32724	57
4.3303	153	4.3303	88	4.3303	48	4.3303	44
4.33335	137	4.33335	126	4.33335	46	4.33335	63
4.33641	123	4.33641	111	4.33641	51	4.33641	47
4.33946	143	4.33946	111	4.33946	58	4.33946	45
4.34251	156	4.34251	129	4.34251	48	4.34251	68
4.34557	152	4.34557	118	4.34557	51	4.34557	69
4.34862	147	4.34862	105	4.34862	61	4.34862	48
4.35167	152	4.35167	111	4.35167	51	4.35167	40
4.35473	146	4.35473	124	4.35473	48	4.35473	64
4.35778	152	4.35778	105	4.35778	72	4.35778	47
4.36084	175	4.36084	116	4.36084	50	4.36084	60
4.36389	146	4.36389	104	4.36389	51	4.36389	46
4.36694	152	4.36694	104	4.36694	47	4.36694	51
4.37	147	4.37	111	4.37	54	4.37	56
4.37305	135	4.37305	91	4.37305	54	4.37305	65
4.37611	151	4.37611	90	4.37611	54	4.37611	49
4.37916	154	4.37916	113	4.37916	48	4.37916	61
4.38221	139	4.38221	107	4.38221	48	4.38221	46
4.38527	145	4.38527	98	4.38527	52	4.38527	50
4.38832	148	4.38832	126	4.38832	49	4.38832	52
4.39137	146	4.39137	106	4.39137	55	4.39137	45
4.39443	128	4.39443	123	4.39443	47	4.39443	61
4.39748	162	4.39748	116	4.39748	49	4.39748	58
4.40054	131	4.40054	127	4.40054	62	4.40054	65
4.40359	145	4.40359	109	4.40359	48	4.40359	61
4.40664	143	4.40664	121	4.40664	51	4.40664	72
4.4097	140	4.4097	126	4.4097	61	4.4097	55
4.41275	137	4.41275	128	4.41275	46	4.41275	61
4.4158	152	4.4158	104	4.4158	53	4.4158	53
4.41886	148	4.41886	113	4.41886	52	4.41886	64
4.42191	164	4.42191	102	4.42191	52	4.42191	48
4.42497	162	4.42497	129	4.42497	54	4.42497	59
4.42802	130	4.42802	114	4.42802	56	4.42802	44
4.43107	124	4.43107	101	4.43107	57	4.43107	60
4.43413	152	4.43413	132	4.43413	57	4.43413	58
4.43718	139	4.43718	110	4.43718	58	4.43718	60
4.44024	158	4.44024	112	4.44024	53	4.44024	56
4.44329	124	4.44329	104	4.44329	57	4.44329	71
4.44634	149	4.44634	129	4.44634	55	4.44634	56
4.4494	158	4.4494	111	4.4494	48	4.4494	65
4.45245	124	4.45245	116	4.45245	58	4.45245	67
4.4555	159	4.4555	100	4.4555	34	4.4555	45
4.45856	123	4.45856	118	4.45856	62	4.45856	52
4.46161	142	4.46161	94	4.46161	54	4.46161	63
4.46467	121	4.46467	122	4.46467	41	4.46467	55
4.46772	168	4.46772	120	4.46772	46	4.46772	53
4.47077	147	4.47077	105	4.47077	48	4.47077	61
4.47383	147	4.47383	110	4.47383	46	4.47383	64
4.47688	124	4.47688	124	4.47688	46	4.47688	51
4.47993	140	4.47993	104	4.47993	49	4.47993	44
4.48299	120	4.48299	96	4.48299	55	4.48299	58
4.48604	120	4.48604	116	4.48604	50	4.48604	63
4.4891	136	4.4891	114	4.4891	54	4.4891	47
4.49215	155	4.49215	107	4.49215	46	4.49215	64
4.4952	158	4.4952	105	4.4952	49	4.4952	59
4.49826	115	4.49826	115	4.49826	57	4.49826	49
4.50131	118	4.50131	129	4.50131	46	4.50131	58
4.50437	118	4.50437	84	4.50437	53	4.50437	39
4.50742	140	4.50742	102	4.50742	52	4.50742	37
4.51047	150	4.51047	107	4.51047	49	4.51047	54
4.51353	147	4.51353	100	4.51353	46	4.51353	65
4.51658	150	4.51658	97	4.51658	52	4.51658	56
4.51963	138	4.51963	112	4.51963	51	4.51963	56
4.52269	106	4.52269	96	4.52269	55	4.52269	51
4.52574	139	4.52574	113	4.52574	37	4.52574	48
4.5288	121	4.5288	109	4.5288	60	4.5288	51
4.53185	122	4.53185	81	4.53185	52	4.53185	78
4.5349	129	4.5349	106	4.5349	54	4.5349	45
4.53796	114	4.53796	96	4.53796	54	4.53796	68
4.54101	132	4.54101	90	4.54101	39	4.54101	46
4.54406	114	4.54406	102	4.54406	41	4.54406	50
4.54712	109	4.54712	106	4.54712	36	4.54712	56
4.55017	132	4.55017	104	4.55017	46	4.55017	47
4.55323	127	4.55323	116	4.55323	55	4.55323	53
4.55628	148	4.55628	97	4.55628	54	4.55628	48
4.55933	138	4.55933	111	4.55933	48	4.55933	50
4.56239	137	4.56239	98	4.56239	45	4.56239	56
4.56544	135	4.56544	71	4.56544	46	4.56544	48
4.5685	118	4.5685	92	4.5685	47	4.5685	39
4.57155	123	4.57155	100	4.57155	49	4.57155	56
4.5746	124	4.5746	99	4.5746	55	4.5746	45
4.57766	136	4.57766	126	4.57766	37	4.57766	48
4.58071	127	4.58071	110	4.58071	69	4.58071	54
4.58376	114	4.58376	99	4.58376	51	4.58376	59
4.58682	149	4.58682	100	4.58682	42	4.58682	53
4.58987	118	4.58987	101	4.58987	36	4.58987	46
4.59293	118	4.59293	116	4.59293	42	4.59293	45
4.59598	125	4.59598	87	4.59598	37	4.59598	46
4.59903	125	4.59903	103	4.59903	41	4.59903	55
4.60209	121	4.60209	96	4.60209	47	4.60209	37
4.60514	111	4.60514	97	4.60514	42	4.60514	39
4.60819	122	4.60819	96	4.60819	51	4.60819	49
4.61125	116	4.61125	95	4.61125	44	4.61125	46
4.6143	128	4.6143	93	4.6143	39	4.6143	49
4.61736	115	4.61736	114	4.61736	49	4.61736	50
4.62041	102	4.62041	106	4.62041	45	4.62041	45
4.62346	124	4.62346	80	4.62346	46	4.62346	49
4.62652	137	4.62652	83	4.62652	44	4.62652	61
4.62957	120	4.62957	95	4.62957	44	4.62957	52
4.63263	117	4.63263	82	4.63263	32	4.63263	50
4.63568	135	4.63568	99	4.63568	42	4.63568	37
4.63873	124	4.63873	77	4.63873	46	4.63873	50
4.64179	103	4.64179	94	4.64179	48	4.64179	50
4.64484	121	4.64484	89	4.64484	52	4.64484	34
4.64789	131	4.64789	83	4.64789	35	4.64789	55
4.65095	127	4.65095	94	4.65095	35	4.65095	59
4.654	114	4.654	90	4.654	40	4.654	44
4.65706	117	4.65706	88	4.65706	47	4.65706	38
4.66011	118	4.66011	93	4.66011	32	4.66011	47
4.66316	135	4.66316	95	4.66316	60	4.66316	56
4.66622	101	4.66622	92	4.66622	48	4.66622	59
4.66927	102	4.66927	99	4.66927	34	4.66927	32
4.67232	102	4.67232	101	4.67232	29	4.67232	61
4.67538	112	4.67538	117	4.67538	41	4.67538	41
4.67843	134	4.67843	77	4.67843	38	4.67843	46
4.68149	99	4.68149	94	4.68149	36	4.68149	52
4.68454	110	4.68454	92	4.68454	41	4.68454	44
4.68759	123	4.68759	98	4.68759	34	4.68759	48
4.69065	102	4.69065	83	4.69065	36	4.69065	40
4.6937	99	4.6937	96	4.6937	35	4.6937	46
4.69676	103	4.69676	72	4.69676	35	4.69676	54
4.69981	110	4.69981	79	4.69981	45	4.69981	50
4.70286	104	4.70286	75	4.70286	45	4.70286	49
4.70592	116	4.70592	73	4.70592	38	4.70592	51
4.70897	117	4.70897	90	4.70897	49	4.70897	40
4.71202	93	4.71202	88	4.71202	39	4.71202	47
4.71508	128	4.71508	73	4.71508	44	4.71508	42
4.71813	106	4.71813	89	4.71813	40	4.71813	53
4.72119	126	4.72119	91	4.72119	30	4.72119	48
4.72424	83	4.72424	95	4.72424	38	4.72424	40
4.72729	125	4.72729	81	4.72729	36	4.72729	46
4.73035	107	4.73035	95	4.73035	38	4.73035	45
4.7334	96	4.7334	83	4.7334	50	4.7334	47
4.73645	103	4.73645	95	4.73645	51	4.73645	42
4.73951	119	4.73951	99	4.73951	37	4.73951	35
4.74256	113	4.74256	106	4.74256	47	4.74256	44
4.74562	118	4.74562	82	4.74562	39	4.74562	50
4.74867	116	4.74867	90	4.74867	38	4.74867	48
4.75172	114	4.75172	93	4.75172	44	4.75172	49
4.75478	117	4.75478	101	4.75478	41	4.75478	41
4.75783	104	4.75783	105	4.75783	34	4.75783	47
4.76089	105	4.76089	78	4.76089	50	4.76089	52
4.76394	122	4.76394	94	4.76394	36	4.76394	58
4.76699	128	4.76699	98	4.76699	29	4.76699	41
4.77005	118	4.77005	91	4.77005	40	4.77005	56
4.7731	113	4.7731	94	4.7731	33	4.7731	42
4.77615	93	4.77615	84	4.77615	35	4.77615	33
4.77921	90	4.77921	99	4.77921	40	4.77921	38
4.78226	105	4.78226	62	4.78226	30	4.78226	55
4.78532	118	4.78532	94	4.78532	38	4.78532	46
4.78837	123	4.78837	113	4.78837	29	4.78837	46
4.79142	116	4.79142	101	4.79142	39	4.79142	39
4.79448	108	4.79448	87	4.79448	38	4.79448	50
4.79753	116	4.79753	101	4.79753	35	4.79753	42
4.80058	129	4.80058	82	4.80058	38	4.80058	44
4.80364	117	4.80364	82	4.80364	48	4.80364	40
4.80669	117	4.80669	88	4.80669	30	4.80669	44
4.80975	94	4.80975	98	4.80975	46	4.80975	39
4.8128	102	4.8128	67	4.8128	44	4.8128	48
4.81585	109	4.81585	75	4.81585	37	4.81585	44
4.81891	115	4.81891	96	4.81891	41	4.81891	37
4.82196	106	4.82196	87	4.82196	38	4.82196	42
4.82501	109	4.82501	100	4.82501	41	4.82501	50
4.82807	101	4.82807	94	4.82807	32	4.82807	44
4.83112	106	4.83112	88	4.83112	39	4.83112	48
4.83418	100	4.83418	87	4.83418	42	4.83418	45
4.83723	126	4.83723	73	4.83723	46	4.83723	45
4.84028	92	4.84028	80	4.84028	30	4.84028	38
4.84334	103	4.84334	91	4.84334	37	4.84334	47
4.84639	109	4.84639	89	4.84639	42	4.84639	50
4.84945	107	4.84945	87	4.84945	38	4.84945	39
4.8525	95	4.8525	69	4.8525	49	4.8525	47
4.85555	118	4.85555	94	4.85555	43	4.85555	41
4.85861	102	4.85861	105	4.85861	29	4.85861	45
4.86166	124	4.86166	86	4.86166	37	4.86166	40
4.86471	107	4.86471	94	4.86471	52	4.86471	41
4.86777	123	4.86777	74	4.86777	39	4.86777	46
4.87082	94	4.87082	100	4.87082	43	4.87082	39
4.87388	104	4.87388	82	4.87388	36	4.87388	38
4.87693	93	4.87693	89	4.87693	31	4.87693	43
4.87998	101	4.87998	84	4.87998	32	4.87998	25
4.88304	115	4.88304	91	4.88304	46	4.88304	51
4.88609	108	4.88609	99	4.88609	29	4.88609	30
4.88914	107	4.88914	105	4.88914	41	4.88914	52
4.8922	118	4.8922	88	4.8922	41	4.8922	45
4.89525	113	4.89525	87	4.89525	39	4.89525	34
4.89831	105	4.89831	75	4.89831	32	4.89831	50
4.90136	98	4.90136	93	4.90136	50	4.90136	38
4.90441	87	4.90441	80	4.90441	25	4.90441	26
4.90747	93	4.90747	95	4.90747	41	4.90747	50
4.91052	103	4.91052	83	4.91052	37	4.91052	44
4.91358	113	4.91358	94	4.91358	42	4.91358	46
4.91663	79	4.91663	87	4.91663	33	4.91663	33
4.91968	91	4.91968	63	4.91968	42	4.91968	38
4.92274	105	4.92274	92	4.92274	41	4.92274	40
4.92579	105	4.92579	90	4.92579	43	4.92579	43
4.92884	132	4.92884	101	4.92884	45	4.92884	48
4.9319	96	4.9319	76	4.9319	39	4.9319	51
4.93495	96	4.93495	96	4.93495	33	4.93495	40
4.93801	93	4.93801	82	4.93801	36	4.93801	52
4.94106	90	4.94106	87	4.94106	38	4.94106	43
4.94411	105	4.94411	84	4.94411	30	4.94411	50
4.94717	96	4.94717	85	4.94717	38	4.94717	36
4.95022	102	4.95022	89	4.95022	36	4.95022	44
4.95327	94	4.95327	71	4.95327	27	4.95327	39
4.95633	83	4.95633	89	4.95633	27	4.95633	28
4.95938	115	4.95938	84	4.95938	26	4.95938	34
4.96244	105	4.96244	84	4.96244	31	4.96244	40
4.96549	108	4.96549	86	4.96549	34	4.96549	40
4.96854	110	4.96854	85	4.96854	47	4.96854	33
4.9716	89	4.9716	97	4.9716	41	4.9716	40
4.97465	100	4.97465	79	4.97465	31	4.97465	30
4.97771	102	4.97771	70	4.97771	39	4.97771	47
4.98076	92	4.98076	67	4.98076	29	4.98076	46
4.98381	104	4.98381	81	4.98381	41	4.98381	48
4.98687	101	4.98687	73	4.98687	34	4.98687	45
4.98992	85	4.98992	97	4.98992	43	4.98992	41
4.99297	75	4.99297	92	4.99297	30	4.99297	39
4.99603	106	4.99603	89	4.99603	25	4.99603	37
4.99908	119	4.99908	93	4.99908	35	4.99908	49
5.00214	105	5.00214	92	5.00214	37	5.00214	35
5.00519	104	5.00519	80	5.00519	39	5.00519	41
5.00824	87	5.00824	78	5.00824	29	5.00824	40
5.0113	91	5.0113	83	5.0113	28	5.0113	32
5.01435	92	5.01435	77	5.01435	36	5.01435	48
5.0174	105	5.0174	77	5.0174	40	5.0174	40
5.02046	107	5.02046	83	5.02046	43	5.02046	40
5.02351	81	5.02351	83	5.02351	34	5.02351	34
5.02657	92	5.02657	85	5.02657	29	5.02657	31
5.02962	95	5.02962	81	5.02962	31	5.02962	44
5.03267	101	5.03267	83	5.03267	29	5.03267	40
5.03573	87	5.03573	75	5.03573	27	5.03573	39
5.03878	81	5.03878	97	5.03878	44	5.03878	33
5.04184	101	5.04184	87	5.04184	35	5.04184	38
5.04489	97	5.04489	84	5.04489	34	5.04489	41
5.04794	103	5.04794	83	5.04794	35	5.04794	39
5.051	93	5.051	94	5.051	45	5.051	33
5.05405	85	5.05405	71	5.05405	32	5.05405	44
5.0571	96	5.0571	81	5.0571	38	5.0571	44
5.06016	93	5.06016	72	5.06016	41	5.06016	41
5.06321	83	5.06321	89	5.06321	42	5.06321	34
5.06627	81	5.06627	93	5.06627	28	5.06627	38
5.06932	87	5.06932	74	5.06932	41	5.06932	40
5.07237	83	5.07237	88	5.07237	31	5.07237	36
5.07543	104	5.07543	63	5.07543	28	5.07543	39
5.07848	82	5.07848	62	5.07848	26	5.07848	41
5.08153	92	5.08153	74	5.08153	39	5.08153	38
5.08459	103	5.08459	66	5.08459	30	5.08459	51
5.08764	107	5.08764	69	5.08764	42	5.08764	40
5.0907	95	5.0907	80	5.0907	25	5.0907	32
5.09375	93	5.09375	82	5.09375	47	5.09375	36
5.0968	80	5.0968	65	5.0968	41	5.0968	35
5.09986	107	5.09986	81	5.09986	31	5.09986	33
5.10291	101	5.10291	82	5.10291	27	5.10291	36
5.10597	95	5.10597	82	5.10597	32	5.10597	39
5.10902	92	5.10902	85	5.10902	34	5.10902	31
5.11207	100	5.11207	82	5.11207	28	5.11207	37
5.11513	89	5.11513	77	5.11513	31	5.11513	43
5.11818	100	5.11818	80	5.11818	35	5.11818	31
5.12123	91	5.12123	67	5.12123	30	5.12123	33
5.12429	95	5.12429	67	5.12429	33	5.12429	40
5.12734	78	5.12734	73	5.12734	47	5.12734	37
5.1304	85	5.1304	68	5.1304	37	5.1304	30
5.13345	82	5.13345	59	5.13345	31	5.13345	34
5.1365	97	5.1365	78	5.1365	30	5.1365	34
5.13956	84	5.13956	64	5.13956	35	5.13956	46
5.14261	90	5.14261	82	5.14261	26	5.14261	27
5.14566	69	5.14566	69	5.14566	35	5.14566	29
5.14872	87	5.14872	73	5.14872	33	5.14872	34
5.15177	90	5.15177	67	5.15177	30	5.15177	38
5.15483	89	5.15483	82	5.15483	44	5.15483	37
5.15788	96	5.15788	76	5.15788	33	5.15788	29
5.16093	77	5.16093	71	5.16093	38	5.16093	44
5.16399	84	5.16399	57	5.16399	32	5.16399	33
5.16704	76	5.16704	82	5.16704	28	5.16704	29
5.1701	88	5.1701	80	5.1701	36	5.1701	29
5.17315	82	5.17315	78	5.17315	34	5.17315	32
5.1762	70	5.1762	67	5.1762	36	5.1762	28
5.17926	85	5.17926	70	5.17926	39	5.17926	48
5.18231	95	5.18231	59	5.18231	28	5.18231	35
5.18536	75	5.18536	56	5.18536	31	5.18536	37
5.18842	74	5.18842	65	5.18842	46	5.18842	35
5.19147	96	5.19147	77	5.19147	39	5.19147	35
5.19453	90	5.19453	62	5.19453	30	5.19453	27
5.19758	82	5.19758	70	5.19758	29	5.19758	33
5.20063	83	5.20063	74	5.20063	37	5.20063	36
5.20369	94	5.20369	62	5.20369	27	5.20369	27
5.20674	76	5.20674	85	5.20674	31	5.20674	35
5.20979	89	5.20979	68	5.20979	37	5.20979	33
5.21285	87	5.21285	77	5.21285	27	5.21285	36
5.2159	106	5.2159	65	5.2159	39	5.2159	35
5.21896	89	5.21896	75	5.21896	29	5.21896	32
5.22201	82	5.22201	71	5.22201	31	5.22201	36
5.22506	74	5.22506	70	5.22506	27	5.22506	33
5.22812	88	5.22812	74	5.22812	31	5.22812	31
5.23117	79	5.23117	70	5.23117	28	5.23117	36
5.23423	83	5.23423	70	5.23423	23	5.23423	39
5.23728	94	5.23728	64	5.23728	37	5.23728	29
5.24033	88	5.24033	66	5.24033	34	5.24033	38
5.24339	70	5.24339	75	5.24339	33	5.24339	27
5.24644	73	5.24644	63	5.24644	27	5.24644	32
5.24949	75	5.24949	63	5.24949	28	5.24949	28
5.25255	71	5.25255	75	5.25255	24	5.25255	45
5.2556	80	5.2556	70	5.2556	37	5.2556	37
5.25866	81	5.25866	80	5.25866	36	5.25866	31
5.26171	93	5.26171	78	5.26171	29	5.26171	33
5.26476	83	5.26476	79	5.26476	29	5.26476	29
5.26782	79	5.26782	80	5.26782	33	5.26782	33
5.27087	73	5.27087	68	5.27087	22	5.27087	41
5.27392	82	5.27392	82	5.27392	36	5.27392	43
5.27698	87	5.27698	65	5.27698	39	5.27698	35
5.28003	89	5.28003	85	5.28003	36	5.28003	27
5.28309	90	5.28309	74	5.28309	43	5.28309	28
5.28614	82	5.28614	72	5.28614	45	5.28614	31
5.28919	84	5.28919	70	5.28919	34	5.28919	27
5.29225	76	5.29225	60	5.29225	23	5.29225	37
5.2953	88	5.2953	77	5.2953	32	5.2953	29
5.29836	90	5.29836	62	5.29836	32	5.29836	48
5.30141	77	5.30141	76	5.30141	20	5.30141	38
5.30446	86	5.30446	75	5.30446	31	5.30446	38
5.30752	77	5.30752	69	5.30752	41	5.30752	28
5.31057	57	5.31057	74	5.31057	35	5.31057	33
5.31362	68	5.31362	75	5.31362	27	5.31362	37
5.31668	77	5.31668	66	5.31668	25	5.31668	37
5.31973	83	5.31973	69	5.31973	38	5.31973	39
5.32279	78	5.32279	77	5.32279	23	5.32279	26
5.32584	86	5.32584	80	5.32584	34	5.32584	19
5.32889	70	5.32889	85	5.32889	38	5.32889	25
5.33195	79	5.33195	77	5.33195	23	5.33195	25
5.335	67	5.335	65	5.335	34	5.335	25
5.33805	64	5.33805	65	5.33805	33	5.33805	39
5.34111	80	5.34111	63	5.34111	30	5.34111	32
5.34416	73	5.34416	67	5.34416	23	5.34416	25
5.34722	77	5.34722	62	5.34722	29	5.34722	33
5.35027	78	5.35027	95	5.35027	40	5.35027	32
5.35332	85	5.35332	71	5.35332	34	5.35332	40
5.35638	79	5.35638	65	5.35638	37	5.35638	32
5.35943	87	5.35943	69	5.35943	30	5.35943	36
5.36249	80	5.36249	70	5.36249	40	5.36249	21
5.36554	97	5.36554	65	5.36554	31	5.36554	21
5.36859	83	5.36859	67	5.36859	35	5.36859	29
5.37165	75	5.37165	74	5.37165	30	5.37165	29
5.3747	68	5.3747	84	5.3747	31	5.3747	33
5.37775	69	5.37775	62	5.37775	34	5.37775	35
5.38081	81	5.38081	72	5.38081	26	5.38081	34
5.38386	84	5.38386	75	5.38386	30	5.38386	33
5.38692	77	5.38692	63	5.38692	30	5.38692	34
5.38997	69	5.38997	69	5.38997	36	5.38997	31
5.39302	89	5.39302	68	5.39302	26	5.39302	24
5.39608	83	5.39608	85	5.39608	32	5.39608	27
5.39913	62	5.39913	80	5.39913	31	5.39913	25
5.40218	80	5.40218	87	5.40218	27	5.40218	28
5.40524	84	5.40524	63	5.40524	32	5.40524	26
5.40829	74	5.40829	70	5.40829	30	5.40829	30
5.41135	97	5.41135	72	5.41135	28	5.41135	28
5.4144	54	5.4144	63	5.4144	23	5.4144	38
5.41745	74	5.41745	78	5.41745	32	5.41745	34
5.42051	83	5.42051	67	5.42051	40	5.42051	32
5.42356	73	5.42356	81	5.42356	30	5.42356	27
5.42661	62	5.42661	65	5.42661	48	5.42661	27
5.42967	69	5.42967	72	5.42967	28	5.42967	30
5.43272	88	5.43272	66	5.43272	28	5.43272	20
5.43578	61	5.43578	58	5.43578	29	5.43578	38
5.43883	76	5.43883	83	5.43883	28	5.43883	31
5.44188	52	5.44188	70	5.44188	21	5.44188	31
5.44494	80	5.44494	70	5.44494	29	5.44494	27
5.44799	76	5.44799	74	5.44799	23	5.44799	31
5.45105	76	5.45105	76	5.45105	23	5.45105	33
5.4541	94	5.4541	73	5.4541	36	5.4541	32
5.45715	79	5.45715	64	5.45715	27	5.45715	33
5.46021	76	5.46021	67	5.46021	32	5.46021	23
5.46326	84	5.46326	64	5.46326	28	5.46326	21
5.46631	85	5.46631	69	5.46631	20	5.46631	38
5.46937	79	5.46937	69	5.46937	34	5.46937	40
5.47242	70	5.47242	83	5.47242	23	5.47242	32
5.47548	74	5.47548	82	5.47548	30	5.47548	31
5.47853	71	5.47853	78	5.47853	22	5.47853	22
5.48158	71	5.48158	66	5.48158	40	5.48158	35
5.48464	89	5.48464	72	5.48464	36	5.48464	27
5.48769	71	5.48769	70	5.48769	20	5.48769	28
5.49074	82	5.49074	64	5.49074	19	5.49074	34
5.4938	70	5.4938	61	5.4938	32	5.4938	31
5.49685	81	5.49685	56	5.49685	21	5.49685	29
5.49991	71	5.49991	62	5.49991	25	5.49991	26
5.50296	71	5.50296	77	5.50296	25	5.50296	27
5.50601	85	5.50601	54	5.50601	38	5.50601	22
5.50907	79	5.50907	61	5.50907	25	5.50907	37
5.51212	74	5.51212	67	5.51212	26	5.51212	34
5.51518	80	5.51518	71	5.51518	22	5.51518	25
5.51823	77	5.51823	71	5.51823	28	5.51823	30
5.52128	71	5.52128	64	5.52128	28	5.52128	31
5.52434	76	5.52434	59	5.52434	30	5.52434	31
5.52739	77	5.52739	64	5.52739	26	5.52739	42
5.53044	87	5.53044	68	5.53044	32	5.53044	24
5.5335	81	5.5335	72	5.5335	34	5.5335	34
5.53655	84	5.53655	86	5.53655	34	5.53655	38
5.53961	73	5.53961	56	5.53961	31	5.53961	34
5.54266	65	5.54266	64	5.54266	25	5.54266	34
5.54571	68	5.54571	69	5.54571	27	5.54571	36
5.54877	63	5.54877	59	5.54877	28	5.54877	31
5.55182	74	5.55182	61	5.55182	33	5.55182	18
5.55487	81	5.55487	73	5.55487	37	5.55487	34
5.55793	67	5.55793	68	5.55793	13	5.55793	30
5.56098	82	5.56098	65	5.56098	26	5.56098	30
5.56404	65	5.56404	50	5.56404	31	5.56404	36
5.56709	80	5.56709	77	5.56709	25	5.56709	32
5.57014	60	5.57014	67	5.57014	35	5.57014	26
5.5732	63	5.5732	66	5.5732	26	5.5732	31
5.57625	75	5.57625	64	5.57625	38	5.57625	35
5.57931	65	5.57931	60	5.57931	37	5.57931	35
5.58236	67	5.58236	72	5.58236	27	5.58236	35
5.58541	73	5.58541	65	5.58541	37	5.58541	23
5.58847	69	5.58847	65	5.58847	28	5.58847	26
5.59152	67	5.59152	47	5.59152	28	5.59152	32
5.59457	94	5.59457	55	5.59457	24	5.59457	22
5.59763	65	5.59763	62	5.59763	27	5.59763	28
5.60068	62	5.60068	57	5.60068	25	5.60068	39
5.60374	67	5.60374	78	5.60374	28	5.60374	29
5.60679	63	5.60679	56	5.60679	32	5.60679	23
5.60984	68	5.60984	57	5.60984	27	5.60984	35
5.6129	67	5.6129	67	5.6129	29	5.6129	16
5.61595	74	5.61595	73	5.61595	22	5.61595	25
5.619	56	5.619	52	5.619	25	5.619	37
5.62206	71	5.62206	65	5.62206	26	5.62206	27
5.62511	63	5.62511	71	5.62511	36	5.62511	31
5.62817	83	5.62817	70	5.62817	20	5.62817	27
5.63122	56	5.63122	62	5.63122	29	5.63122	31
5.63427	66	5.63427	61	5.63427	20	5.63427	30
5.63733	67	5.63733	70	5.63733	26	5.63733	28
5.64038	56	5.64038	66	5.64038	26	5.64038	34
5.64344	65	5.64344	65	5.64344	22	5.64344	27
5.64649	60	5.64649	54	5.64649	24	5.64649	37
5.64954	73	5.64954	60	5.64954	24	5.64954	25
5.6526	60	5.6526	63	5.6526	28	5.6526	31
5.65565	63	5.65565	68	5.65565	22	5.65565	28
5.6587	60	5.6587	77	5.6587	31	5.6587	29
5.66176	66	5.66176	61	5.66176	33	5.66176	38
5.66481	67	5.66481	73	5.66481	25	5.66481	36
5.66787	71	5.66787	67	5.66787	25	5.66787	26
5.67092	71	5.67092	73	5.67092	30	5.67092	24
5.67397	65	5.67397	58	5.67397	29	5.67397	13
5.67703	55	5.67703	52	5.67703	30	5.67703	29
5.68008	69	5.68008	66	5.68008	16	5.68008	28
5.68313	82	5.68313	58	5.68313	31	5.68313	25
5.68619	58	5.68619	70	5.68619	30	5.68619	24
5.68924	75	5.68924	55	5.68924	33	5.68924	29
5.6923	78	5.6923	59	5.6923	24	5.6923	34
5.69535	64	5.69535	57	5.69535	26	5.69535	25
5.6984	61	5.6984	50	5.6984	30	5.6984	31
5.70146	75	5.70146	55	5.70146	27	5.70146	25
5.70451	65	5.70451	47	5.70451	23	5.70451	34
5.70757	67	5.70757	58	5.70757	19	5.70757	29
5.71062	67	5.71062	52	5.71062	24	5.71062	34
5.71367	67	5.71367	72	5.71367	27	5.71367	22
5.71673	89	5.71673	70	5.71673	33	5.71673	35
5.71978	72	5.71978	70	5.71978	21	5.71978	26
5.72283	74	5.72283	64	5.72283	19	5.72283	32
5.72589	58	5.72589	53	5.72589	36	5.72589	31
5.72894	60	5.72894	62	5.72894	26	5.72894	26
5.732	65	5.732	76	5.732	34	5.732	26
5.73505	65	5.73505	62	5.73505	28	5.73505	35
5.7381	73	5.7381	63	5.7381	29	5.7381	28
5.74116	68	5.74116	58	5.74116	34	5.74116	29
5.74421	79	5.74421	49	5.74421	26	5.74421	28
5.74726	64	5.74726	66	5.74726	26	5.74726	30
5.75032	67	5.75032	63	5.75032	30	5.75032	26
5.75337	64	5.75337	55	5.75337	35	5.75337	30
5.75643	78	5.75643	59	5.75643	25	5.75643	23
5.75948	67	5.75948	65	5.75948	23	5.75948	26
5.76253	67	5.76253	53	5.76253	25	5.76253	29
5.76559	60	5.76559	60	5.76559	27	5.76559	24
5.76864	61	5.76864	64	5.76864	25	5.76864	29
5.7717	65	5.7717	62	5.7717	21	5.7717	23
5.77475	72	5.77475	57	5.77475	29	5.77475	21
5.7778	63	5.7778	67	5.7778	24	5.7778	25
5.78086	71	5.78086	44	5.78086	30	5.78086	30
5.78391	72	5.78391	63	5.78391	28	5.78391	26
5.78696	54	5.78696	73	5.78696	20	5.78696	38
5.79002	68	5.79002	64	5.79002	27	5.79002	28
5.79307	58	5.79307	60	5.79307	27	5.79307	27
5.79613	69	5.79613	60	5.79613	30	5.79613	29
5.79918	60	5.79918	50	5.79918	32	5.79918	21
5.80223	50	5.80223	67	5.80223	24	5.80223	25
5.80529	67	5.80529	70	5.80529	23	5.80529	23
5.80834	60	5.80834	57	5.80834	25	5.80834	24
5.81139	49	5.81139	50	5.81139	27	5.81139	26
5.81445	63	5.81445	56	5.81445	16	5.81445	34
5.8175	70	5.8175	59	5.8175	20	5.8175	24
5.82056	59	5.82056	39	5.82056	24	5.82056	19
5.82361	60	5.82361	67	5.82361	22	5.82361	32
5.82666	60	5.82666	45	5.82666	21	5.82666	21
5.82972	69	5.82972	60	5.82972	30	5.82972	22
5.83277	64	5.83277	59	5.83277	27	5.83277	22
5.83583	57	5.83583	55	5.83583	32	5.83583	20
5.83888	43	5.83888	60	5.83888	25	5.83888	23
5.84193	59	5.84193	61	5.84193	26	5.84193	30
5.84499	65	5.84499	44	5.84499	17	5.84499	29
5.84804	63	5.84804	46	5.84804	23	5.84804	28
5.85109	61	5.85109	49	5.85109	25	5.85109	25
5.85415	61	5.85415	59	5.85415	20	5.85415	29
5.8572	65	5.8572	57	5.8572	31	5.8572	24
5.86026	79	5.86026	54	5.86026	26	5.86026	27
5.86331	59	5.86331	65	5.86331	31	5.86331	31
5.86636	54	5.86636	62	5.86636	19	5.86636	19
5.86942	83	5.86942	53	5.86942	27	5.86942	19
5.87247	68	5.87247	52	5.87247	29	5.87247	22
5.87552	51	5.87552	60	5.87552	23	5.87552	22
5.87858	60	5.87858	42	5.87858	26	5.87858	23
5.88163	67	5.88163	63	5.88163	24	5.88163	22
5.88469	74	5.88469	63	5.88469	32	5.88469	35
5.88774	75	5.88774	54	5.88774	26	5.88774	19
5.89079	70	5.89079	39	5.89079	22	5.89079	26
5.89385	68	5.89385	52	5.89385	24	5.89385	29
5.8969	54	5.8969	47	5.8969	19	5.8969	26
5.89996	71	5.89996	61	5.89996	36	5.89996	25
5.90301	62	5.90301	69	5.90301	24	5.90301	30
5.90606	58	5.90606	69	5.90606	24	5.90606	26
5.90912	45	5.90912	53	5.90912	19	5.90912	17
5.91217	59	5.91217	52	5.91217	29	5.91217	29
5.91522	51	5.91522	55	5.91522	27	5.91522	27
5.91828	61	5.91828	54	5.91828	21	5.91828	33
5.92133	56	5.92133	57	5.92133	31	5.92133	27
5.92439	59	5.92439	52	5.92439	22	5.92439	23
5.92744	68	5.92744	51	5.92744	27	5.92744	22
5.93049	62	5.93049	42	5.93049	20	5.93049	17
5.93355	53	5.93355	56	5.93355	22	5.93355	27
5.9366	56	5.9366	51	5.9366	20	5.9366	29
5.93965	65	5.93965	49	5.93965	14	5.93965	21
5.94271	48	5.94271	63	5.94271	26	5.94271	24
5.94576	48	5.94576	53	5.94576	20	5.94576	16
5.94882	65	5.94882	55	5.94882	31	5.94882	20
5.95187	64	5.95187	57	5.95187	23	5.95187	23
5.95492	63	5.95492	59	5.95492	18	5.95492	28
5.95798	49	5.95798	50	5.95798	22	5.95798	26
5.96103	57	5.96103	53	5.96103	27	5.96103	22
5.96408	70	5.96408	71	5.96408	27	5.96408	23
5.96714	62	5.96714	54	5.96714	20	5.96714	19
5.97019	51	5.97019	51	5.97019	21	5.97019	23
5.97325	50	5.97325	67	5.97325	20	5.97325	24
5.9763	57	5.9763	60	5.9763	20	5.9763	33
5.97935	51	5.97935	60	5.97935	29	5.97935	19
5.98241	64	5.98241	56	5.98241	25	5.98241	21
5.98546	48	5.98546	49	5.98546	37	5.98546	23
5.98852	70	5.98852	43	5.98852	27	5.98852	16
5.99157	51	5.99157	52	5.99157	26	5.99157	30
5.99462	51	5.99462	48	5.99462	28	5.99462	22
5.99768	55	5.99768	64	5.99768	16	5.99768	37
6.00073	68	6.00073	54	6.00073	24	6.00073	19
6.00378	62	6.00378	49	6.00378	25	6.00378	22
6.00684	61	6.00684	53	6.00684	19	6.00684	16
6.00989	66	6.00989	57	6.00989	29	6.00989	28
6.01295	60	6.01295	67	6.01295	28	6.01295	21
6.016	58	6.016	56	6.016	28	6.016	17
6.01905	59	6.01905	48	6.01905	25	6.01905	29
6.02211	52	6.02211	50	6.02211	22	6.02211	19
6.02516	56	6.02516	39	6.02516	12	6.02516	20
6.02821	65	6.02821	54	6.02821	28	6.02821	33
6.03127	63	6.03127	53	6.03127	24	6.03127	21
6.03432	54	6.03432	48	6.03432	31	6.03432	32
6.03738	50	6.03738	47	6.03738	25	6.03738	19
6.04043	66	6.04043	47	6.04043	17	6.04043	19
6.04348	58	6.04348	61	6.04348	21	6.04348	22
6.04654	65	6.04654	47	6.04654	23	6.04654	16
6.04959	46	6.04959	52	6.04959	23	6.04959	28
6.05265	62	6.05265	49	6.05265	14	6.05265	26
6.0557	47	6.0557	48	6.0557	21	6.0557	27
6.05875	62	6.05875	60	6.05875	20	6.05875	22
6.06181	54	6.06181	52	6.06181	30	6.06181	16
6.06486	58	6.06486	57	6.06486	28	6.06486	29
6.06791	59	6.06791	56	6.06791	20	6.06791	25
6.07097	67	6.07097	59	6.07097	23	6.07097	35
6.07402	65	6.07402	52	6.07402	25	6.07402	20
6.07708	42	6.07708	40	6.07708	27	6.07708	18
6.08013	42	6.08013	62	6.08013	17	6.08013	22
6.08318	57	6.08318	51	6.08318	24	6.08318	27
6.08624	49	6.08624	51	6.08624	19	6.08624	29
6.08929	45	6.08929	51	6.08929	20	6.08929	28
6.09234	57	6.09234	43	6.09234	32	6.09234	25
6.0954	43	6.0954	65	6.0954	22	6.0954	23
6.09845	58	6.09845	57	6.09845	23	6.09845	35
6.10151	59	6.10151	55	6.10151	19	6.10151	21
[truncated: 2,097 more rows]

## Sheet: npq4 lhcsr1 LL
DARK		DARK		60' LIGHT		60' LIGHT
0	0	0	0	0	0	0	0
0.00305	0	0.00305	0	0.00305	0	0.00305	0
0.00611	0	0.00611	0	0.00611	0	0.00611	0
0.00916	0	0.00916	0	0.00916	0	0.00916	0
0.01222	0	0.01222	0	0.01222	0	0.01222	0
0.01527	0	0.01527	0	0.01527	0	0.01527	0
0.01832	0	0.01832	0	0.01832	0	0.01832	0
0.02138	0	0.02138	0	0.02138	0	0.02138	0
0.02443	0	0.02443	0	0.02443	0	0.02443	0
0.02748	0	0.02748	0	0.02748	0	0.02748	0
0.03054	0	0.03054	0	0.03054	0	0.03054	0
0.03359	0	0.03359	0	0.03359	0	0.03359	0
0.03665	0	0.03665	0	0.03665	0	0.03665	0
0.0397	0	0.0397	0	0.0397	0	0.0397	0
0.04275	0	0.04275	0	0.04275	0	0.04275	0
0.04581	0	0.04581	0	0.04581	0	0.04581	0
0.04886	0	0.04886	0	0.04886	0	0.04886	0
0.05191	0	0.05191	0	0.05191	0	0.05191	0
0.05497	0	0.05497	0	0.05497	0	0.05497	0
0.05802	0	0.05802	0	0.05802	0	0.05802	0
0.06108	0	0.06108	0	0.06108	0	0.06108	0
0.06413	0	0.06413	0	0.06413	0	0.06413	0
0.06718	0	0.06718	0	0.06718	0	0.06718	0
0.07024	0	0.07024	0	0.07024	0	0.07024	0
0.07329	0	0.07329	0	0.07329	0	0.07329	0
0.07635	0	0.07635	0	0.07635	0	0.07635	0
0.0794	0	0.0794	0	0.0794	0	0.0794	0
0.08245	0	0.08245	0	0.08245	0	0.08245	0
0.08551	0	0.08551	0	0.08551	0	0.08551	0
0.08856	0	0.08856	0	0.08856	0	0.08856	0
0.09161	0	0.09161	0	0.09161	0	0.09161	0
0.09467	0	0.09467	0	0.09467	0	0.09467	0
0.09772	0	0.09772	0	0.09772	0	0.09772	0
0.10078	0	0.10078	0	0.10078	0	0.10078	0
0.10383	0	0.10383	0	0.10383	0	0.10383	0
0.10688	0	0.10688	0	0.10688	0	0.10688	0
0.10994	0	0.10994	0	0.10994	0	0.10994	0
0.11299	0	0.11299	0	0.11299	0	0.11299	0
0.11604	0	0.11604	0	0.11604	0	0.11604	0
0.1191	0	0.1191	0	0.1191	0	0.1191	0
0.12215	0	0.12215	0	0.12215	0	0.12215	0
0.12521	0	0.12521	0	0.12521	0	0.12521	0
0.12826	0	0.12826	0	0.12826	0	0.12826	0
0.13131	0	0.13131	0	0.13131	0	0.13131	0
0.13437	0	0.13437	0	0.13437	0	0.13437	0
0.13742	0	0.13742	0	0.13742	0	0.13742	0
0.14048	0	0.14048	0	0.14048	0	0.14048	0
0.14353	0	0.14353	0	0.14353	0	0.14353	0
0.14658	0	0.14658	0	0.14658	0	0.14658	0
0.14964	0	0.14964	0	0.14964	0	0.14964	0
0.15269	0	0.15269	0	0.15269	0	0.15269	0
0.15574	0	0.15574	0	0.15574	0	0.15574	0
0.1588	0	0.1588	0	0.1588	0	0.1588	0
0.16185	0	0.16185	0	0.16185	0	0.16185	0
0.16491	0	0.16491	0	0.16491	0	0.16491	0
0.16796	0	0.16796	0	0.16796	0	0.16796	0
0.17101	0	0.17101	0	0.17101	0	0.17101	0
0.17407	0	0.17407	0	0.17407	0	0.17407	0
0.17712	0	0.17712	0	0.17712	0	0.17712	0
0.18017	0	0.18017	0	0.18017	0	0.18017	0
0.18323	0	0.18323	0	0.18323	0	0.18323	0
0.18628	0	0.18628	0	0.18628	0	0.18628	0
0.18934	0	0.18934	0	0.18934	0	0.18934	0
0.19239	0	0.19239	0	0.19239	0	0.19239	0
0.19544	0	0.19544	0	0.19544	0	0.19544	0
0.1985	0	0.1985	0	0.1985	0	0.1985	0
0.20155	0	0.20155	0	0.20155	0	0.20155	0
0.20461	0	0.20461	0	0.20461	0	0.20461	0
0.20766	0	0.20766	0	0.20766	0	0.20766	0
0.21071	0	0.21071	0	0.21071	0	0.21071	0
0.21377	0	0.21377	0	0.21377	0	0.21377	0
0.21682	0	0.21682	0	0.21682	0	0.21682	0
0.21987	0	0.21987	0	0.21987	0	0.21987	0
0.22293	0	0.22293	0	0.22293	0	0.22293	0
0.22598	0	0.22598	0	0.22598	0	0.22598	0
0.22904	0	0.22904	0	0.22904	0	0.22904	0
0.23209	0	0.23209	0	0.23209	0	0.23209	0
0.23514	0	0.23514	0	0.23514	0	0.23514	0
0.2382	0	0.2382	0	0.2382	0	0.2382	0
0.24125	0	0.24125	0	0.24125	0	0.24125	0
0.2443	0	0.2443	0	0.2443	0	0.2443	0
0.24736	0	0.24736	0	0.24736	0	0.24736	0
0.25041	0	0.25041	0	0.25041	0	0.25041	0
0.25347	0	0.25347	0	0.25347	0	0.25347	0
0.25652	0	0.25652	0	0.25652	0	0.25652	0
0.25957	0	0.25957	0	0.25957	0	0.25957	0
0.26263	0	0.26263	0	0.26263	0	0.26263	0
0.26568	0	0.26568	0	0.26568	0	0.26568	0
0.26874	0	0.26874	0	0.26874	0	0.26874	0
0.27179	0	0.27179	0	0.27179	0	0.27179	0
0.27484	0	0.27484	0	0.27484	0	0.27484	0
0.2779	0	0.2779	0	0.2779	0	0.2779	0
0.28095	0	0.28095	0	0.28095	0	0.28095	0
0.284	0	0.284	0	0.284	0	0.284	0
0.28706	0	0.28706	0	0.28706	0	0.28706	0
0.29011	0	0.29011	0	0.29011	0	0.29011	0
0.29317	0	0.29317	0	0.29317	0	0.29317	0
0.29622	0	0.29622	0	0.29622	0	0.29622	0
0.29927	0	0.29927	0	0.29927	0	0.29927	0
0.30233	0	0.30233	0	0.30233	0	0.30233	0
0.30538	0	0.30538	0	0.30538	0	0.30538	0
0.30843	0	0.30843	0	0.30843	0	0.30843	0
0.31149	0	0.31149	0	0.31149	0	0.31149	0
0.31454	0	0.31454	0	0.31454	0	0.31454	0
0.3176	0	0.3176	0	0.3176	0	0.3176	0
0.32065	0	0.32065	0	0.32065	0	0.32065	0
0.3237	0	0.3237	0	0.3237	0	0.3237	0
0.32676	0	0.32676	0	0.32676	0	0.32676	0
0.32981	0	0.32981	0	0.32981	0	0.32981	0
0.33286	0	0.33286	0	0.33286	0	0.33286	0
0.33592	0	0.33592	0	0.33592	0	0.33592	0
0.33897	0	0.33897	0	0.33897	0	0.33897	0
0.34203	0	0.34203	0	0.34203	0	0.34203	0
0.34508	0	0.34508	0	0.34508	0	0.34508	0
0.34813	0	0.34813	0	0.34813	0	0.34813	0
0.35119	0	0.35119	0	0.35119	0	0.35119	0
0.35424	0	0.35424	0	0.35424	0	0.35424	0
0.3573	0	0.3573	0	0.3573	0	0.3573	0
0.36035	0	0.36035	0	0.36035	0	0.36035	0
0.3634	0	0.3634	0	0.3634	0	0.3634	0
0.36646	0	0.36646	0	0.36646	0	0.36646	0
0.36951	0	0.36951	0	0.36951	0	0.36951	0
0.37256	0	0.37256	0	0.37256	0	0.37256	0
0.37562	0	0.37562	0	0.37562	0	0.37562	0
0.37867	0	0.37867	0	0.37867	0	0.37867	0
0.38173	0	0.38173	0	0.38173	0	0.38173	0
0.38478	0	0.38478	0	0.38478	0	0.38478	0
0.38783	0	0.38783	0	0.38783	0	0.38783	0
0.39089	0	0.39089	0	0.39089	0	0.39089	0
0.39394	0	0.39394	0	0.39394	0	0.39394	0
0.39699	0	0.39699	0	0.39699	0	0.39699	0
0.40005	0	0.40005	0	0.40005	0	0.40005	0
0.4031	0	0.4031	0	0.4031	0	0.4031	0
0.40616	0	0.40616	0	0.40616	0	0.40616	0
0.40921	0	0.40921	0	0.40921	0	0.40921	0
0.41226	0	0.41226	0	0.41226	0	0.41226	0
0.41532	0	0.41532	0	0.41532	0	0.41532	0
0.41837	0	0.41837	0	0.41837	0	0.41837	0
0.42143	0	0.42143	0	0.42143	0	0.42143	0
0.42448	0	0.42448	0	0.42448	0	0.42448	0
0.42753	0	0.42753	0	0.42753	0	0.42753	0
0.43059	0	0.43059	0	0.43059	0	0.43059	0
0.43364	0	0.43364	0	0.43364	0	0.43364	0
0.43669	0	0.43669	0	0.43669	0	0.43669	0
0.43975	0	0.43975	0	0.43975	0	0.43975	0
0.4428	0	0.4428	0	0.4428	0	0.4428	0
0.44586	0	0.44586	0	0.44586	0	0.44586	0
0.44891	0	0.44891	0	0.44891	0	0.44891	0
0.45196	0	0.45196	0	0.45196	0	0.45196	0
0.45502	0	0.45502	0	0.45502	0	0.45502	0
0.45807	0	0.45807	0	0.45807	0	0.45807	0
0.46112	0	0.46112	0	0.46112	0	0.46112	0
0.46418	0	0.46418	0	0.46418	0	0.46418	0
0.46723	0	0.46723	0	0.46723	0	0.46723	0
0.47029	0	0.47029	0	0.47029	0	0.47029	0
0.47334	0	0.47334	0	0.47334	0	0.47334	0
0.47639	0	0.47639	0	0.47639	0	0.47639	0
0.47945	0	0.47945	0	0.47945	0	0.47945	0
0.4825	0	0.4825	0	0.4825	0	0.4825	0
0.48556	0	0.48556	0	0.48556	0	0.48556	0
0.48861	0	0.48861	0	0.48861	0	0.48861	0
0.49166	0	0.49166	0	0.49166	0	0.49166	0
0.49472	0	0.49472	0	0.49472	0	0.49472	0
0.49777	0	0.49777	0	0.49777	0	0.49777	0
0.50082	0	0.50082	0	0.50082	0	0.50082	0
0.50388	0	0.50388	0	0.50388	0	0.50388	0
0.50693	0	0.50693	0	0.50693	0	0.50693	0
0.50999	0	0.50999	0	0.50999	0	0.50999	0
0.51304	0	0.51304	0	0.51304	0	0.51304	0
0.51609	0	0.51609	0	0.51609	0	0.51609	0
0.51915	0	0.51915	0	0.51915	0	0.51915	0
0.5222	0	0.5222	0	0.5222	0	0.5222	0
0.52525	0	0.52525	0	0.52525	0	0.52525	0
0.52831	0	0.52831	0	0.52831	0	0.52831	0
0.53136	0	0.53136	0	0.53136	0	0.53136	0
0.53442	0	0.53442	0	0.53442	0	0.53442	0
0.53747	0	0.53747	0	0.53747	0	0.53747	0
0.54052	0	0.54052	0	0.54052	0	0.54052	0
0.54358	0	0.54358	0	0.54358	0	0.54358	0
0.54663	0	0.54663	0	0.54663	0	0.54663	0
0.54969	0	0.54969	0	0.54969	0	0.54969	0
0.55274	0	0.55274	0	0.55274	0	0.55274	0
0.55579	0	0.55579	0	0.55579	0	0.55579	0
0.55885	0	0.55885	0	0.55885	0	0.55885	0
0.5619	0	0.5619	0	0.5619	0	0.5619	0
0.56495	0	0.56495	0	0.56495	0	0.56495	0
0.56801	0	0.56801	0	0.56801	0	0.56801	0
0.57106	0	0.57106	0	0.57106	0	0.57106	0
0.57412	0	0.57412	0	0.57412	0	0.57412	0
0.57717	0	0.57717	0	0.57717	0	0.57717	0
0.58022	0	0.58022	0	0.58022	0	0.58022	0
0.58328	0	0.58328	0	0.58328	0	0.58328	0
0.58633	0	0.58633	0	0.58633	0	0.58633	0
0.58938	0	0.58938	0	0.58938	0	0.58938	0
0.59244	0	0.59244	0	0.59244	0	0.59244	0
0.59549	0	0.59549	0	0.59549	0	0.59549	0
0.59855	0	0.59855	0	0.59855	0	0.59855	0
0.6016	0	0.6016	0	0.6016	0	0.6016	0
0.60465	0	0.60465	0	0.60465	0	0.60465	0
0.60771	0	0.60771	0	0.60771	0	0.60771	0
0.61076	0	0.61076	0	0.61076	0	0.61076	0
0.61382	0	0.61382	0	0.61382	0	0.61382	0
0.61687	0	0.61687	0	0.61687	0	0.61687	0
0.61992	0	0.61992	0	0.61992	0	0.61992	0
0.62298	0	0.62298	0	0.62298	0	0.62298	0
0.62603	0	0.62603	0	0.62603	0	0.62603	0
0.62908	0	0.62908	0	0.62908	0	0.62908	0
0.63214	0	0.63214	0	0.63214	0	0.63214	0
0.63519	8	0.63519	8	0.63519	16	0.63519	12
0.63825	5	0.63825	5	0.63825	22	0.63825	16
0.6413	10	0.6413	6	0.6413	17	0.6413	7
0.64435	4	0.64435	5	0.64435	28	0.64435	15
0.64741	3	0.64741	10	0.64741	16	0.64741	16
0.65046	3	0.65046	13	0.65046	16	0.65046	9
0.65351	11	0.65351	15	0.65351	18	0.65351	10
0.65657	2	0.65657	3	0.65657	20	0.65657	15
0.65962	7	0.65962	4	0.65962	15	0.65962	13
0.66268	12	0.66268	5	0.66268	15	0.66268	16
0.66573	11	0.66573	8	0.66573	14	0.66573	7
0.66878	6	0.66878	9	0.66878	22	0.66878	17
0.67184	8	0.67184	7	0.67184	19	0.67184	13
0.67489	7	0.67489	12	0.67489	12	0.67489	10
0.67795	8	0.67795	11	0.67795	14	0.67795	14
0.681	4	0.681	8	0.681	15	0.681	12
0.68405	9	0.68405	8	0.68405	18	0.68405	10
0.68711	7	0.68711	12	0.68711	23	0.68711	8
0.69016	6	0.69016	7	0.69016	13	0.69016	23
0.69321	5	0.69321	8	0.69321	17	0.69321	17
0.69627	2	0.69627	9	0.69627	13	0.69627	13
0.69932	5	0.69932	4	0.69932	15	0.69932	8
0.70238	5	0.70238	7	0.70238	12	0.70238	14
0.70543	7	0.70543	8	0.70543	14	0.70543	13
0.70848	6	0.70848	3	0.70848	16	0.70848	11
0.71154	11	0.71154	8	0.71154	19	0.71154	19
0.71459	8	0.71459	4	0.71459	23	0.71459	16
0.71764	5	0.71764	8	0.71764	25	0.71764	11
0.7207	6	0.7207	4	0.7207	17	0.7207	12
0.72375	7	0.72375	9	0.72375	20	0.72375	15
0.72681	6	0.72681	7	0.72681	18	0.72681	15
0.72986	10	0.72986	5	0.72986	16	0.72986	15
0.73291	8	0.73291	3	0.73291	22	0.73291	13
0.73597	8	0.73597	9	0.73597	21	0.73597	12
0.73902	12	0.73902	6	0.73902	25	0.73902	21
0.74208	7	0.74208	4	0.74208	19	0.74208	10
0.74513	3	0.74513	8	0.74513	17	0.74513	19
0.74818	5	0.74818	5	0.74818	20	0.74818	16
0.75124	8	0.75124	8	0.75124	13	0.75124	11
0.75429	4	0.75429	10	0.75429	25	0.75429	17
0.75734	6	0.75734	8	0.75734	16	0.75734	9
0.7604	12	0.7604	5	0.7604	16	0.7604	7
0.76345	12	0.76345	10	0.76345	31	0.76345	23
0.76651	5	0.76651	12	0.76651	20	0.76651	13
0.76956	6	0.76956	5	0.76956	15	0.76956	8
0.77261	5	0.77261	6	0.77261	16	0.77261	12
0.77567	8	0.77567	11	0.77567	21	0.77567	14
0.77872	7	0.77872	7	0.77872	21	0.77872	15
0.78177	7	0.78177	10	0.78177	16	0.78177	13
0.78483	5	0.78483	4	0.78483	24	0.78483	20
0.78788	4	0.78788	5	0.78788	15	0.78788	14
0.79094	3	0.79094	6	0.79094	25	0.79094	15
0.79399	10	0.79399	4	0.79399	25	0.79399	20
0.79704	13	0.79704	8	0.79704	21	0.79704	22
0.8001	8	0.8001	7	0.8001	24	0.8001	9
0.80315	9	0.80315	8	0.80315	17	0.80315	15
0.80621	10	0.80621	7	0.80621	28	0.80621	21
0.80926	7	0.80926	11	0.80926	24	0.80926	14
0.81231	6	0.81231	7	0.81231	24	0.81231	16
0.81537	14	0.81537	2	0.81537	25	0.81537	13
0.81842	9	0.81842	9	0.81842	23	0.81842	16
0.82147	11	0.82147	5	0.82147	26	0.82147	20
0.82453	9	0.82453	8	0.82453	24	0.82453	18
0.82758	6	0.82758	11	0.82758	23	0.82758	13
0.83064	4	0.83064	9	0.83064	31	0.83064	15
0.83369	10	0.83369	7	0.83369	26	0.83369	21
0.83674	7	0.83674	6	0.83674	30	0.83674	20
0.8398	3	0.8398	6	0.8398	23	0.8398	19
0.84285	8	0.84285	18	0.84285	28	0.84285	20
0.8459	3	0.8459	9	0.8459	37	0.8459	23
0.84896	7	0.84896	10	0.84896	27	0.84896	19
0.85201	10	0.85201	6	0.85201	29	0.85201	25
0.85507	8	0.85507	3	0.85507	25	0.85507	29
0.85812	9	0.85812	8	0.85812	42	0.85812	23
0.86117	3	0.86117	11	0.86117	32	0.86117	31
0.86423	6	0.86423	6	0.86423	37	0.86423	31
0.86728	7	0.86728	10	0.86728	47	0.86728	34
0.87033	10	0.87033	12	0.87033	34	0.87033	34
0.87339	12	0.87339	20	0.87339	42	0.87339	30
0.87644	11	0.87644	21	0.87644	44	0.87644	38
0.8795	10	0.8795	16	0.8795	52	0.8795	44
0.88255	17	0.88255	24	0.88255	50	0.88255	49
0.8856	16	0.8856	24	0.8856	45	0.8856	58
0.88866	17	0.88866	32	0.88866	64	0.88866	55
0.89171	16	0.89171	32	0.89171	74	0.89171	54
0.89477	15	0.89477	37	0.89477	83	0.89477	78
0.89782	17	0.89782	42	0.89782	100	0.89782	75
0.90087	26	0.90087	26	0.90087	102	0.90087	100
0.90393	27	0.90393	40	0.90393	97	0.90393	99
0.90698	21	0.90698	60	0.90698	102	0.90698	116
0.91003	32	0.91003	51	0.91003	123	0.91003	130
0.91309	48	0.91309	46	0.91309	148	0.91309	138
0.91614	32	0.91614	65	0.91614	170	0.91614	140
0.9192	40	0.9192	91	0.9192	168	0.9192	174
0.92225	49	0.92225	78	0.92225	197	0.92225	185
0.9253	51	0.9253	98	0.9253	205	0.9253	215
0.92836	47	0.92836	87	0.92836	240	0.92836	236
0.93141	67	0.93141	94	0.93141	231	0.93141	265
0.93446	66	0.93446	139	0.93446	267	0.93446	272
0.93752	99	0.93752	136	0.93752	293	0.93752	290
0.94057	81	0.94057	176	0.94057	338	0.94057	318
0.94363	99	0.94363	171	0.94363	365	0.94363	342
0.94668	106	0.94668	171	0.94668	404	0.94668	371
0.94973	135	0.94973	182	0.94973	446	0.94973	404
0.95279	119	0.95279	201	0.95279	465	0.95279	476
0.95584	136	0.95584	209	0.95584	468	0.95584	438
0.9589	167	0.9589	232	0.9589	523	0.9589	507
0.96195	154	0.96195	249	0.96195	524	0.96195	543
0.965	175	0.965	267	0.965	594	0.965	551
0.96806	161	0.96806	258	0.96806	629	0.96806	595
0.97111	204	0.97111	279	0.97111	680	0.97111	652
0.97416	193	0.97416	320	0.97416	738	0.97416	667
0.97722	207	0.97722	354	0.97722	767	0.97722	719
0.98027	213	0.98027	321	0.98027	778	0.98027	771
0.98333	264	0.98333	369	0.98333	797	0.98333	767
0.98638	254	0.98638	359	0.98638	888	0.98638	882
0.98943	280	0.98943	427	0.98943	906	0.98943	833
0.99249	285	0.99249	426	0.99249	920	0.99249	926
0.99554	288	0.99554	407	0.99554	1051	0.99554	974
0.99859	295	0.99859	437	0.99859	1048	0.99859	1009
1.00165	328	1.00165	460	1.00165	1080	1.00165	1044
1.0047	333	1.0047	473	1.0047	1162	1.0047	1083
1.00776	332	1.00776	462	1.00776	1200	1.00776	1163
1.01081	373	1.01081	568	1.01081	1205	1.01081	1168
1.01386	380	1.01386	536	1.01386	1330	1.01386	1171
1.01692	390	1.01692	587	1.01692	1288	1.01692	1232
1.01997	451	1.01997	565	1.01997	1385	1.01997	1345
1.02303	461	1.02303	599	1.02303	1419	1.02303	1403
1.02608	421	1.02608	651	1.02608	1450	1.02608	1413
1.02913	436	1.02913	598	1.02913	1493	1.02913	1359
1.03219	447	1.03219	658	1.03219	1521	1.03219	1509
1.03524	463	1.03524	685	1.03524	1651	1.03524	1549
1.03829	494	1.03829	680	1.03829	1657	1.03829	1569
1.04135	473	1.04135	664	1.04135	1689	1.04135	1603
1.0444	485	1.0444	695	1.0444	1670	1.0444	1707
1.04746	542	1.04746	726	1.04746	1825	1.04746	1707
1.05051	541	1.05051	796	1.05051	1778	1.05051	1744
1.05356	585	1.05356	774	1.05356	1895	1.05356	1734
1.05662	546	1.05662	796	1.05662	1937	1.05662	1793
1.05967	578	1.05967	810	1.05967	1998	1.05967	1869
1.06272	599	1.06272	814	1.06272	2016	1.06272	1924
1.06578	612	1.06578	840	1.06578	1946	1.06578	1903
1.06883	607	1.06883	826	1.06883	2055	1.06883	2028
1.07189	660	1.07189	814	1.07189	2076	1.07189	1972
1.07494	638	1.07494	864	1.07494	2198	1.07494	2019
1.07799	665	1.07799	888	1.07799	2209	1.07799	2093
1.08105	702	1.08105	857	1.08105	2236	1.08105	2136
1.0841	676	1.0841	881	1.0841	2194	1.0841	2083
1.08716	698	1.08716	914	1.08716	2230	1.08716	2135
1.09021	710	1.09021	921	1.09021	2309	1.09021	2273
1.09326	732	1.09326	989	1.09326	2294	1.09326	2212
1.09632	771	1.09632	976	1.09632	2332	1.09632	2286
1.09937	714	1.09937	951	1.09937	2341	1.09937	2265
1.10242	743	1.10242	968	1.10242	2464	1.10242	2272
1.10548	767	1.10548	980	1.10548	2373	1.10548	2372
1.10853	729	1.10853	998	1.10853	2486	1.10853	2300
1.11159	768	1.11159	1009	1.11159	2543	1.11159	2346
1.11464	790	1.11464	1003	1.11464	2543	1.11464	2479
1.11769	799	1.11769	1062	1.11769	2453	1.11769	2437
1.12075	809	1.12075	1069	1.12075	2521	1.12075	2502
1.1238	845	1.1238	1041	1.1238	2562	1.1238	2507
1.12685	823	1.12685	1087	1.12685	2608	1.12685	2498
1.12991	865	1.12991	1038	1.12991	2621	1.12991	2557
1.13296	853	1.13296	1045	1.13296	2668	1.13296	2522
1.13602	854	1.13602	1108	1.13602	2689	1.13602	2699
1.13907	869	1.13907	1110	1.13907	2767	1.13907	2563
1.14212	862	1.14212	1085	1.14212	2715	1.14212	2686
1.14518	878	1.14518	1103	1.14518	2703	1.14518	2685
1.14823	924	1.14823	1145	1.14823	2724	1.14823	2575
1.15129	847	1.15129	1118	1.15129	2798	1.15129	2651
1.15434	903	1.15434	1127	1.15434	2700	1.15434	2678
1.15739	902	1.15739	1117	1.15739	2884	1.15739	2686
1.16045	962	1.16045	1161	1.16045	2874	1.16045	2811
1.1635	939	1.1635	1168	1.1635	2912	1.1635	2715
1.16655	905	1.16655	1178	1.16655	2934	1.16655	2815
1.16961	939	1.16961	1169	1.16961	2962	1.16961	2737
1.17266	915	1.17266	1212	1.17266	2922	1.17266	2710
1.17572	973	1.17572	1216	1.17572	3067	1.17572	2844
1.17877	896	1.17877	1168	1.17877	2946	1.17877	2765
1.18182	933	1.18182	1170	1.18182	3007	1.18182	2897
1.18488	942	1.18488	1278	1.18488	3038	1.18488	2856
1.18793	966	1.18793	1225	1.18793	3091	1.18793	2886
1.19098	960	1.19098	1222	1.19098	3055	1.19098	2817
1.19404	1016	1.19404	1193	1.19404	2977	1.19404	2840
1.19709	974	1.19709	1182	1.19709	2999	1.19709	2933
1.20015	993	1.20015	1256	1.20015	2986	1.20015	2892
1.2032	985	1.2032	1187	1.2032	3121	1.2032	3029
1.20625	984	1.20625	1270	1.20625	3133	1.20625	2916
1.20931	952	1.20931	1230	1.20931	3092	1.20931	2931
1.21236	927	1.21236	1229	1.21236	3124	1.21236	2891
1.21542	1040	1.21542	1255	1.21542	3100	1.21542	3038
1.21847	960	1.21847	1280	1.21847	3099	1.21847	2894
1.22152	981	1.22152	1247	1.22152	3141	1.22152	2955
1.22458	972	1.22458	1214	1.22458	3174	1.22458	3033
1.22763	986	1.22763	1230	1.22763	3148	1.22763	3067
1.23068	989	1.23068	1327	1.23068	3066	1.23068	3013
1.23374	1013	1.23374	1257	1.23374	3033	1.23374	3016
1.23679	1096	1.23679	1242	1.23679	3246	1.23679	2972
1.23985	1059	1.23985	1296	1.23985	3139	1.23985	3047
1.2429	1012	1.2429	1270	1.2429	3147	1.2429	3135
1.24595	1024	1.24595	1283	1.24595	3106	1.24595	3039
1.24901	987	1.24901	1272	1.24901	3246	1.24901	3007
1.25206	1001	1.25206	1284	1.25206	3186	1.25206	2943
1.25511	1048	1.25511	1217	1.25511	3108	1.25511	3087
1.25817	992	1.25817	1273	1.25817	3124	1.25817	2969
1.26122	998	1.26122	1288	1.26122	3132	1.26122	3057
1.26428	1020	1.26428	1192	1.26428	3117	1.26428	2925
1.26733	1022	1.26733	1326	1.26733	3162	1.26733	3011
1.27038	946	1.27038	1330	1.27038	3084	1.27038	2861
1.27344	1047	1.27344	1304	1.27344	3147	1.27344	2996
1.27649	947	1.27649	1239	1.27649	3049	1.27649	2957
1.27955	1006	1.27955	1268	1.27955	3090	1.27955	2998
1.2826	1035	1.2826	1311	1.2826	3116	1.2826	2968
1.28565	992	1.28565	1342	1.28565	3082	1.28565	2899
1.28871	959	1.28871	1221	1.28871	3189	1.28871	2958
1.29176	1006	1.29176	1295	1.29176	3123	1.29176	2964
1.29481	981	1.29481	1223	1.29481	3121	1.29481	2948
1.29787	1058	1.29787	1230	1.29787	3054	1.29787	2987
1.30092	998	1.30092	1212	1.30092	3077	1.30092	2990
1.30398	1005	1.30398	1262	1.30398	3137	1.30398	2918
1.30703	975	1.30703	1241	1.30703	3008	1.30703	2999
1.31008	965	1.31008	1262	1.31008	3074	1.31008	2816
1.31314	955	1.31314	1273	1.31314	2985	1.31314	2847
1.31619	979	1.31619	1246	1.31619	3097	1.31619	2922
1.31924	969	1.31924	1216	1.31924	2971	1.31924	2902
1.3223	943	1.3223	1259	1.3223	3081	1.3223	2848
1.32535	950	1.32535	1243	1.32535	2980	1.32535	2905
1.32841	997	1.32841	1251	1.32841	2979	1.32841	2836
1.33146	939	1.33146	1216	1.33146	3049	1.33146	2871
1.33451	984	1.33451	1233	1.33451	2956	1.33451	2681
1.33757	1054	1.33757	1216	1.33757	2922	1.33757	2852
1.34062	985	1.34062	1254	1.34062	2901	1.34062	2769
1.34368	912	1.34368	1248	1.34368	2974	1.34368	2776
1.34673	961	1.34673	1136	1.34673	2926	1.34673	2807
1.34978	971	1.34978	1166	1.34978	2866	1.34978	2792
1.35284	955	1.35284	1243	1.35284	2907	1.35284	2738
1.35589	956	1.35589	1174	1.35589	2934	1.35589	2693
1.35894	932	1.35894	1122	1.35894	2894	1.35894	2721
1.362	893	1.362	1153	1.362	2921	1.362	2698
1.36505	990	1.36505	1189	1.36505	2760	1.36505	2665
1.36811	930	1.36811	1153	1.36811	2878	1.36811	2765
1.37116	911	1.37116	1184	1.37116	2810	1.37116	2703
1.37421	913	1.37421	1158	1.37421	2845	1.37421	2657
1.37727	913	1.37727	1215	1.37727	2838	1.37727	2692
1.38032	905	1.38032	1160	1.38032	2822	1.38032	2657
1.38337	879	1.38337	1147	1.38337	2745	1.38337	2688
1.38643	908	1.38643	1141	1.38643	2750	1.38643	2501
1.38948	905	1.38948	1095	1.38948	2758	1.38948	2585
1.39254	902	1.39254	1047	1.39254	2685	1.39254	2606
1.39559	884	1.39559	1088	1.39559	2726	1.39559	2625
1.39864	873	1.39864	1120	1.39864	2694	1.39864	2525
1.4017	880	1.4017	1083	1.4017	2756	1.4017	2581
1.40475	849	1.40475	1052	1.40475	2695	1.40475	2601
1.40781	861	1.40781	1130	1.40781	2704	1.40781	2550
1.41086	832	1.41086	1128	1.41086	2672	1.41086	2617
1.41391	892	1.41391	1112	1.41391	2666	1.41391	2428
1.41697	863	1.41697	1128	1.41697	2568	1.41697	2570
1.42002	847	1.42002	1045	1.42002	2575	1.42002	2536
1.42307	862	1.42307	1095	1.42307	2621	1.42307	2508
1.42613	888	1.42613	1109	1.42613	2650	1.42613	2476
1.42918	827	1.42918	1093	1.42918	2605	1.42918	2410
1.43224	839	1.43224	1057	1.43224	2548	1.43224	2450
1.43529	818	1.43529	1018	1.43529	2583	1.43529	2420
1.43834	820	1.43834	987	1.43834	2519	1.43834	2448
1.4414	835	1.4414	1055	1.4414	2499	1.4414	2346
1.44445	835	1.44445	981	1.44445	2465	1.44445	2335
1.4475	826	1.4475	1092	1.4475	2525	1.4475	2358
1.45056	814	1.45056	1093	1.45056	2508	1.45056	2406
1.45361	792	1.45361	981	1.45361	2513	1.45361	2398
1.45667	789	1.45667	996	1.45667	2510	1.45667	2319
1.45972	831	1.45972	1045	1.45972	2492	1.45972	2301
1.46277	840	1.46277	997	1.46277	2497	1.46277	2306
1.46583	774	1.46583	1014	1.46583	2531	1.46583	2269
1.46888	836	1.46888	1018	1.46888	2456	1.46888	2310
1.47193	807	1.47193	1071	1.47193	2517	1.47193	2325
1.47499	761	1.47499	923	1.47499	2455	1.47499	2208
1.47804	811	1.47804	917	1.47804	2394	1.47804	2367
1.4811	766	1.4811	1001	1.4811	2317	1.4811	2296
1.48415	811	1.48415	985	1.48415	2450	1.48415	2244
1.4872	781	1.4872	949	1.4872	2308	1.4872	2243
1.49026	790	1.49026	1051	1.49026	2330	1.49026	2290
1.49331	839	1.49331	1020	1.49331	2311	1.49331	2244
1.49637	836	1.49637	991	1.49637	2303	1.49637	2169
1.49942	728	1.49942	1010	1.49942	2397	1.49942	2184
1.50247	786	1.50247	1020	1.50247	2375	1.50247	2200
1.50553	767	1.50553	996	1.50553	2324	1.50553	2119
1.50858	772	1.50858	957	1.50858	2321	1.50858	2192
1.51163	756	1.51163	944	1.51163	2400	1.51163	2209
1.51469	741	1.51469	992	1.51469	2304	1.51469	2181
1.51774	756	1.51774	969	1.51774	2249	1.51774	2171
1.5208	778	1.5208	987	1.5208	2274	1.5208	2115
1.52385	764	1.52385	988	1.52385	2306	1.52385	2156
1.5269	777	1.5269	930	1.5269	2318	1.5269	2144
1.52996	729	1.52996	945	1.52996	2291	1.52996	2166
1.53301	786	1.53301	946	1.53301	2186	1.53301	2089
1.53606	758	1.53606	966	1.53606	2227	1.53606	2166
1.53912	650	1.53912	961	1.53912	2328	1.53912	2075
1.54217	745	1.54217	926	1.54217	2247	1.54217	2073
1.54523	761	1.54523	926	1.54523	2094	1.54523	2036
1.54828	703	1.54828	916	1.54828	2174	1.54828	2067
1.55133	644	1.55133	928	1.55133	2223	1.55133	2048
1.55439	698	1.55439	887	1.55439	2205	1.55439	2012
1.55744	709	1.55744	949	1.55744	2119	1.55744	2035
1.5605	729	1.5605	871	1.5605	2120	1.5605	2094
1.56355	683	1.56355	957	1.56355	2156	1.56355	1979
1.5666	734	1.5666	904	1.5666	2162	1.5666	1942
1.56966	731	1.56966	850	1.56966	2109	1.56966	1980
1.57271	714	1.57271	906	1.57271	2196	1.57271	1943
1.57576	723	1.57576	958	1.57576	2178	1.57576	1964
1.57882	702	1.57882	902	1.57882	2184	1.57882	1979
1.58187	723	1.58187	908	1.58187	2137	1.58187	1932
1.58493	683	1.58493	887	1.58493	2154	1.58493	1921
1.58798	712	1.58798	901	1.58798	2092	1.58798	1962
1.59103	708	1.59103	868	1.59103	2163	1.59103	2001
1.59409	703	1.59409	839	1.59409	1993	1.59409	1900
1.59714	710	1.59714	900	1.59714	2060	1.59714	1986
1.60019	687	1.60019	882	1.60019	2090	1.60019	1987
1.60325	641	1.60325	809	1.60325	2126	1.60325	1845
1.6063	694	1.6063	891	1.6063	2031	1.6063	1893
1.60936	696	1.60936	880	1.60936	2081	1.60936	1821
1.61241	610	1.61241	847	1.61241	2037	1.61241	1832
1.61546	626	1.61546	884	1.61546	2009	1.61546	1850
1.61852	658	1.61852	916	1.61852	2049	1.61852	1826
1.62157	679	1.62157	837	1.62157	2004	1.62157	1910
1.62463	617	1.62463	815	1.62463	1898	1.62463	1880
1.62768	657	1.62768	878	1.62768	2042	1.62768	1819
1.63073	652	1.63073	820	1.63073	1951	1.63073	1830
1.63379	632	1.63379	823	1.63379	1875	1.63379	1780
1.63684	633	1.63684	842	1.63684	1956	1.63684	1729
1.63989	595	1.63989	823	1.63989	2017	1.63989	1782
1.64295	667	1.64295	802	1.64295	1927	1.64295	1784
1.646	581	1.646	814	1.646	1835	1.646	1724
1.64906	684	1.64906	786	1.64906	1923	1.64906	1751
1.65211	680	1.65211	819	1.65211	1945	1.65211	1772
1.65516	585	1.65516	789	1.65516	1887	1.65516	1735
1.65822	595	1.65822	797	1.65822	1845	1.65822	1771
1.66127	594	1.66127	853	1.66127	1777	1.66127	1722
1.66432	605	1.66432	776	1.66432	1865	1.66432	1690
1.66738	601	1.66738	758	1.66738	1816	1.66738	1737
1.67043	626	1.67043	793	1.67043	1806	1.67043	1746
1.67349	589	1.67349	836	1.67349	1820	1.67349	1721
1.67654	570	1.67654	810	1.67654	1747	1.67654	1584
1.67959	606	1.67959	780	1.67959	1815	1.67959	1692
1.68265	621	1.68265	755	1.68265	1832	1.68265	1600
1.6857	605	1.6857	752	1.6857	1731	1.6857	1579
1.68876	569	1.68876	784	1.68876	1723	1.68876	1635
1.69181	577	1.69181	718	1.69181	1769	1.69181	1612
1.69486	572	1.69486	729	1.69486	1733	1.69486	1644
1.69792	554	1.69792	782	1.69792	1715	1.69792	1572
1.70097	596	1.70097	738	1.70097	1725	1.70097	1608
1.70402	567	1.70402	728	1.70402	1670	1.70402	1575
1.70708	567	1.70708	744	1.70708	1754	1.70708	1534
1.71013	559	1.71013	693	1.71013	1784	1.71013	1479
1.71319	569	1.71319	703	1.71319	1572	1.71319	1565
1.71624	520	1.71624	708	1.71624	1635	1.71624	1480
1.71929	565	1.71929	753	1.71929	1681	1.71929	1479
1.72235	566	1.72235	708	1.72235	1647	1.72235	1473
1.7254	542	1.7254	692	1.7254	1631	1.7254	1464
1.72845	502	1.72845	721	1.72845	1677	1.72845	1452
1.73151	492	1.73151	725	1.73151	1641	1.73151	1371
1.73456	525	1.73456	662	1.73456	1587	1.73456	1404
1.73762	545	1.73762	728	1.73762	1651	1.73762	1432
1.74067	511	1.74067	657	1.74067	1622	1.74067	1446
1.74372	526	1.74372	631	1.74372	1548	1.74372	1404
1.74678	547	1.74678	663	1.74678	1540	1.74678	1383
1.74983	504	1.74983	680	1.74983	1562	1.74983	1411
1.75289	542	1.75289	689	1.75289	1438	1.75289	1429
1.75594	482	1.75594	676	1.75594	1568	1.75594	1424
1.75899	475	1.75899	675	1.75899	1499	1.75899	1397
1.76205	549	1.76205	680	1.76205	1448	1.76205	1407
1.7651	516	1.7651	620	1.7651	1462	1.7651	1315
1.76815	521	1.76815	626	1.76815	1437	1.76815	1307
1.77121	496	1.77121	724	1.77121	1482	1.77121	1343
1.77426	503	1.77426	686	1.77426	1478	1.77426	1346
1.77732	451	1.77732	664	1.77732	1466	1.77732	1355
1.78037	471	1.78037	652	1.78037	1477	1.78037	1324
1.78342	485	1.78342	679	1.78342	1448	1.78342	1340
1.78648	513	1.78648	674	1.78648	1435	1.78648	1283
1.78953	513	1.78953	638	1.78953	1418	1.78953	1336
1.79258	494	1.79258	620	1.79258	1402	1.79258	1298
1.79564	514	1.79564	618	1.79564	1441	1.79564	1337
1.79869	504	1.79869	658	1.79869	1443	1.79869	1308
1.80175	458	1.80175	632	1.80175	1423	1.80175	1275
1.8048	476	1.8048	655	1.8048	1418	1.8048	1248
1.80785	466	1.80785	660	1.80785	1420	1.80785	1308
1.81091	473	1.81091	650	1.81091	1421	1.81091	1212
1.81396	488	1.81396	593	1.81396	1372	1.81396	1313
1.81702	500	1.81702	633	1.81702	1341	1.81702	1313
1.82007	487	1.82007	663	1.82007	1435	1.82007	1300
1.82312	441	1.82312	645	1.82312	1325	1.82312	1273
1.82618	464	1.82618	604	1.82618	1333	1.82618	1259
1.82923	411	1.82923	602	1.82923	1346	1.82923	1261
1.83228	494	1.83228	659	1.83228	1336	1.83228	1251
1.83534	460	1.83534	657	1.83534	1367	1.83534	1271
1.83839	486	1.83839	631	1.83839	1364	1.83839	1226
1.84145	497	1.84145	607	1.84145	1391	1.84145	1134
1.8445	464	1.8445	594	1.8445	1386	1.8445	1268
1.84755	474	1.84755	586	1.84755	1364	1.84755	1194
1.85061	477	1.85061	632	1.85061	1352	1.85061	1205
1.85366	476	1.85366	650	1.85366	1390	1.85366	1189
1.85671	486	1.85671	667	1.85671	1335	1.85671	1230
1.85977	470	1.85977	612	1.85977	1324	1.85977	1261
1.86282	472	1.86282	604	1.86282	1327	1.86282	1194
1.86588	479	1.86588	608	1.86588	1327	1.86588	1269
1.86893	416	1.86893	589	1.86893	1322	1.86893	1190
1.87198	483	1.87198	610	1.87198	1306	1.87198	1186
1.87504	478	1.87504	601	1.87504	1279	1.87504	1141
1.87809	475	1.87809	570	1.87809	1284	1.87809	1193
1.88115	442	1.88115	599	1.88115	1300	1.88115	1247
1.8842	508	1.8842	656	1.8842	1236	1.8842	1191
1.88725	497	1.88725	659	1.88725	1293	1.88725	1232
1.89031	417	1.89031	616	1.89031	1286	1.89031	1195
1.89336	463	1.89336	569	1.89336	1264	1.89336	1150
1.89641	445	1.89641	582	1.89641	1279	1.89641	1160
1.89947	465	1.89947	609	1.89947	1262	1.89947	1184
1.90252	387	1.90252	608	1.90252	1253	1.90252	1143
1.90558	475	1.90558	593	1.90558	1280	1.90558	1193
1.90863	442	1.90863	590	1.90863	1268	1.90863	1162
1.91168	446	1.91168	585	1.91168	1331	1.91168	1178
1.91474	424	1.91474	575	1.91474	1266	1.91474	1187
1.91779	430	1.91779	595	1.91779	1216	1.91779	1159
1.92084	429	1.92084	638	1.92084	1221	1.92084	1139
1.9239	428	1.9239	572	1.9239	1337	1.9239	1185
1.92695	436	1.92695	615	1.92695	1211	1.92695	1207
1.93001	476	1.93001	544	1.93001	1320	1.93001	1134
1.93306	432	1.93306	556	1.93306	1279	1.93306	1113
1.93611	442	1.93611	572	1.93611	1301	1.93611	1178
1.93917	413	1.93917	547	1.93917	1222	1.93917	1149
1.94222	442	1.94222	601	1.94222	1224	1.94222	1112
1.94528	414	1.94528	539	1.94528	1242	1.94528	1164
1.94833	423	1.94833	560	1.94833	1226	1.94833	1083
1.95138	440	1.95138	562	1.95138	1240	1.95138	1125
1.95444	429	1.95444	579	1.95444	1200	1.95444	1104
1.95749	418	1.95749	525	1.95749	1277	1.95749	1098
1.96054	431	1.96054	581	1.96054	1180	1.96054	1150
1.9636	418	1.9636	562	1.9636	1137	1.9636	1074
1.96665	470	1.96665	545	1.96665	1208	1.96665	1102
1.96971	417	1.96971	576	1.96971	1122	1.96971	1037
1.97276	428	1.97276	557	1.97276	1247	1.97276	1074
1.97581	412	1.97581	561	1.97581	1220	1.97581	1102
1.97887	418	1.97887	552	1.97887	1189	1.97887	1126
1.98192	427	1.98192	509	1.98192	1193	1.98192	1100
1.98497	410	1.98497	526	1.98497	1154	1.98497	1143
1.98803	383	1.98803	520	1.98803	1134	1.98803	1000
1.99108	411	1.99108	541	1.99108	1084	1.99108	1025
1.99414	433	1.99414	559	1.99414	1067	1.99414	1055
1.99719	416	1.99719	551	1.99719	1141	1.99719	1086
2.00024	387	2.00024	484	2.00024	1210	2.00024	1022
2.0033	400	2.0033	524	2.0033	1099	2.0033	1053
2.00635	403	2.00635	535	2.00635	1154	2.00635	1007
2.0094	361	2.0094	546	2.0094	1123	2.0094	1024
2.01246	412	2.01246	508	2.01246	1161	2.01246	1006
2.01551	391	2.01551	522	2.01551	1112	2.01551	991
2.01857	384	2.01857	483	2.01857	1080	2.01857	1003
2.02162	366	2.02162	526	2.02162	1132	2.02162	1005
2.02467	414	2.02467	515	2.02467	1131	2.02467	1047
2.02773	368	2.02773	509	2.02773	1112	2.02773	975
2.03078	395	2.03078	533	2.03078	1085	2.03078	984
2.03384	360	2.03384	504	2.03384	1101	2.03384	1008
2.03689	364	2.03689	474	2.03689	1074	2.03689	933
2.03994	368	2.03994	502	2.03994	1055	2.03994	914
2.043	399	2.043	513	2.043	1065	2.043	996
2.04605	394	2.04605	496	2.04605	1072	2.04605	918
2.0491	393	2.0491	502	2.0491	1031	2.0491	990
2.05216	362	2.05216	494	2.05216	1122	2.05216	930
2.05521	387	2.05521	479	2.05521	1040	2.05521	927
2.05827	403	2.05827	494	2.05827	1041	2.05827	905
2.06132	366	2.06132	531	2.06132	1002	2.06132	927
2.06437	346	2.06437	465	2.06437	977	2.06437	948
2.06743	407	2.06743	494	2.06743	958	2.06743	907
2.07048	373	2.07048	496	2.07048	965	2.07048	857
2.07353	357	2.07353	463	2.07353	1019	2.07353	888
2.07659	345	2.07659	490	2.07659	1004	2.07659	874
2.07964	385	2.07964	466	2.07964	1005	2.07964	908
2.0827	344	2.0827	490	2.0827	964	2.0827	944
2.08575	370	2.08575	492	2.08575	1000	2.08575	903
2.0888	380	2.0888	456	2.0888	1007	2.0888	876
2.09186	355	2.09186	470	2.09186	989	2.09186	940
2.09491	362	2.09491	503	2.09491	1026	2.09491	836
2.09797	333	2.09797	478	2.09797	949	2.09797	932
2.10102	312	2.10102	463	2.10102	984	2.10102	851
2.10407	325	2.10407	472	2.10407	1006	2.10407	900
2.10713	307	2.10713	459	2.10713	929	2.10713	842
2.11018	319	2.11018	440	2.11018	982	2.11018	853
2.11323	373	2.11323	461	2.11323	954	2.11323	849
2.11629	325	2.11629	452	2.11629	961	2.11629	848
2.11934	329	2.11934	457	2.11934	960	2.11934	816
2.1224	357	2.1224	456	2.1224	880	2.1224	844
2.12545	331	2.12545	448	2.12545	894	2.12545	840
2.1285	317	2.1285	422	2.1285	955	2.1285	818
2.13156	329	2.13156	457	2.13156	946	2.13156	816
2.13461	340	2.13461	414	2.13461	895	2.13461	757
2.13766	350	2.13766	438	2.13766	897	2.13766	805
2.14072	308	2.14072	443	2.14072	923	2.14072	873
2.14377	306	2.14377	422	2.14377	902	2.14377	832
2.14683	332	2.14683	418	2.14683	949	2.14683	828
2.14988	318	2.14988	432	2.14988	899	2.14988	845
2.15293	308	2.15293	433	2.15293	899	2.15293	836
2.15599	310	2.15599	403	2.15599	905	2.15599	790
2.15904	313	2.15904	414	2.15904	925	2.15904	788
2.1621	360	2.1621	407	2.1621	902	2.1621	834
2.16515	312	2.16515	463	2.16515	896	2.16515	779
2.1682	314	2.1682	433	2.1682	870	2.1682	793
2.17126	308	2.17126	426	2.17126	828	2.17126	776
2.17431	313	2.17431	426	2.17431	922	2.17431	809
2.17736	347	2.17736	410	2.17736	811	2.17736	754
2.18042	280	2.18042	402	2.18042	862	2.18042	793
2.18347	300	2.18347	400	2.18347	887	2.18347	833
2.18653	287	2.18653	439	2.18653	871	2.18653	781
2.18958	304	2.18958	387	2.18958	872	2.18958	748
2.19263	309	2.19263	381	2.19263	891	2.19263	808
2.19569	284	2.19569	409	2.19569	871	2.19569	822
2.19874	282	2.19874	419	2.19874	863	2.19874	796
2.20179	286	2.20179	409	2.20179	834	2.20179	731
2.20485	312	2.20485	407	2.20485	835	2.20485	772
2.2079	341	2.2079	422	2.2079	860	2.2079	749
2.21096	312	2.21096	422	2.21096	821	2.21096	720
2.21401	323	2.21401	445	2.21401	829	2.21401	824
2.21706	290	2.21706	439	2.21706	824	2.21706	776
2.22012	305	2.22012	388	2.22012	855	2.22012	707
2.22317	300	2.22317	475	2.22317	795	2.22317	782
2.22623	278	2.22623	381	2.22623	809	2.22623	752
2.22928	281	2.22928	414	2.22928	771	2.22928	734
2.23233	318	2.23233	402	2.23233	787	2.23233	748
2.23539	321	2.23539	405	2.23539	846	2.23539	747
2.23844	299	2.23844	432	2.23844	826	2.23844	770
2.24149	282	2.24149	387	2.24149	809	2.24149	717
2.24455	324	2.24455	436	2.24455	837	2.24455	756
2.2476	268	2.2476	422	2.2476	844	2.2476	704
2.25066	271	2.25066	387	2.25066	797	2.25066	700
2.25371	255	2.25371	422	2.25371	778	2.25371	720
2.25676	290	2.25676	410	2.25676	758	2.25676	647
2.25982	271	2.25982	431	2.25982	822	2.25982	760
2.26287	292	2.26287	419	2.26287	777	2.26287	667
2.26592	289	2.26592	383	2.26592	722	2.26592	746
2.26898	309	2.26898	386	2.26898	824	2.26898	710
2.27203	263	2.27203	379	2.27203	781	2.27203	647
2.27509	286	2.27509	421	2.27509	779	2.27509	688
2.27814	294	2.27814	379	2.27814	727	2.27814	695
2.28119	275	2.28119	353	2.28119	747	2.28119	697
2.28425	313	2.28425	384	2.28425	768	2.28425	671
2.2873	270	2.2873	387	2.2873	792	2.2873	683
2.29036	313	2.29036	401	2.29036	750	2.29036	736
2.29341	273	2.29341	378	2.29341	816	2.29341	714
2.29646	319	2.29646	367	2.29646	751	2.29646	698
2.29952	271	2.29952	371	2.29952	732	2.29952	687
2.30257	318	2.30257	385	2.30257	783	2.30257	710
2.30562	246	2.30562	373	2.30562	707	2.30562	664
2.30868	287	2.30868	390	2.30868	731	2.30868	650
2.31173	268	2.31173	381	2.31173	791	2.31173	636
2.31479	306	2.31479	393	2.31479	788	2.31479	666
2.31784	286	2.31784	420	2.31784	712	2.31784	686
2.32089	266	2.32089	400	2.32089	747	2.32089	704
2.32395	292	2.32395	398	2.32395	759	2.32395	699
2.327	277	2.327	362	2.327	751	2.327	705
2.33005	271	2.33005	354	2.33005	748	2.33005	619
2.33311	270	2.33311	354	2.33311	731	2.33311	624
2.33616	280	2.33616	357	2.33616	720	2.33616	725
2.33922	256	2.33922	375	2.33922	727	2.33922	718
2.34227	281	2.34227	378	2.34227	710	2.34227	655
2.34532	284	2.34532	378	2.34532	769	2.34532	659
2.34838	272	2.34838	392	2.34838	702	2.34838	650
2.35143	266	2.35143	389	2.35143	738	2.35143	687
2.35449	302	2.35449	385	2.35449	706	2.35449	627
2.35754	292	2.35754	354	2.35754	705	2.35754	641
[truncated: 3,323 more rows]

## Sheet: npq4 lhcsr1 HL
DARK		DARK		60' LIGHT		60' LIGHT
[truncated: 4,096 more rows]

[truncated: 4 more sheets: zep LL, zep HL, CC4939 LL, CC4939 HL]
