# Supplementary material for: Identification of distinct pH- and zeaxanthin-dependent quenching in LHCSR3 from Chlamydomonas reinhardtii
Source: eLife journal article supplement (doi:10.7554/elife.60383), 2021-01-15
Supplement: supp [file elife-60383-supp-v1.zip › elife_poa_e60383_Figure_3_source_data_2.xlsx]

## Sheet: Sheet1
	t1	f1	t2	f2	t3	f3	avg lifetime		t1	f1	t2	f2	t3	f3	avg lifetime		mean avg lifetime	dev.st.
4A+ LL --	0.04	0.27	0.45	0.4	1.77	0.34	0.78		0.04	0.28	0.38	0.4	1.79	0.33	0.75		0.77	0.03
4A+LL 60’	0.04	0.21	0.47	0.43	1.78	0.36	0.85		0.04	0.21	0.43	0.48	1.6	0.32	0.72		0.79	0.1
4A+HL --	0.04	0.16	0.48	0.41	1.61	0.43	0.89		0.04	0.16	0.52	0.53	1.88	0.31	0.87		0.88	0.01
4A+HL 60’	0.04	0.29	0.37	0.46	1.57	0.25	0.58		0.04	0.33	0.4	0.41	1.64	0.26	0.61		0.59	0.02
npq4 lhcsr1 LL --	0.04	0.19	0.54	0.41	2	0.41	1.04		0.04	0.17	0.56	0.39	2	0.44	1.1		1.07	0.04
npq4 lhcsr1 LL 60’	0.04	0.19	0.47	0.46	2.06	0.35	0.95		0.04	0.19	0.44	0.45	2.03	0.36	0.94		0.94	0.01
npq4 lhcsr1 HL --	0.04	0.18	0.42	0.46	2.02	0.36	0.93		0.04	0.19	0.42	0.47	2.09	0.34	0.91		0.92	0.01
npq4 lhcsr1 HL 60’	0.04	0.15	0.4	0.49	1.9	0.36	0.88		0.04	0.2	0.41	0.46	1.94	0.34	0.86		0.87	0.01
npq1 LL --	0.04	0.22	0.43	0.46	2.12	0.32	0.88		0.04	0.31	0.42	0.42	2.33	0.27	0.81		0.85	0.05
npq1 LL 60’	0.04	0.15	0.4	0.52	1.89	0.33	0.84		0.04	0.28	0.46	0.44	2.34	0.29	0.88		0.86	0.03
npq1 HL --	0.04	0.25	0.53	0.44	1.92	0.32	0.85		0.04	0.24	0.52	0.44	2.37	0.32	0.99		0.92	0.1
npq1 HL 60’	0.04	0.35	0.34	0.35	1.46	0.3	0.57		0.04	0.32	0.46	0.42	1.75	0.26	0.66		0.61	0.07
cc4349 LL --	0.04	0.27	0.39	0.43	2.24	0.3	0.86		0.04	0.33	0.44	0.39	2.1	0.29	0.79		0.82	0.05
cc4349 LL 60'	0.04	0.24	0.42	0.45	2.37	0.31	0.94		0.04	0.26	0.41	0.45	1.87	0.29	0.75		0.84	0.14
cc4349 HL --	0.04	0.19	0.42	0.38	1.7	0.42	0.89		0.04	0.21	0.4	0.41	1.66	0.38	0.81		0.85	0.06
cc4349 HL 60'	0.04	0.26	0.34	0.42	1.37	0.31	0.59		0.04	0.25	0.35	0.48	1.76	0.27	0.66		0.62	0.05
zep LL --	0.04	0.41	0.4	0.32	1.93	0.27	0.67		0.04	0.46	0.34	0.33	1.72	0.21	0.49		0.58	0.12
zep LL 60’	0.04	0.21	0.33	0.45	1.58	0.34	0.7		0.04	0.38	0.39	0.37	1.82	0.25	0.61		0.66	0.06
zep HL --	0.04	0.36	0.38	0.39	1.79	0.25	0.61		0.04	0.32	0.27	0.39	1.23	0.3	0.48		0.54	0.09
zep HL 60’	0.04	0.34	0.36	0.39	1.59	0.27	0.59		0.04	0.38	0.31	0.37	1.49	0.24	0.49		0.54	0.07
