# Supplementary material for: Identification of distinct pH- and zeaxanthin-dependent quenching in LHCSR3 from Chlamydomonas reinhardtii
Source: eLife journal article supplement (doi:10.7554/elife.60383), 2021-01-15
Supplement: supp [file elife-60383-supp-v1.zip › elife_poa_e60383_Figure_3_source_data_3.xlsx]

## Sheet: Foglio1
cc4349 t60 b2			cc4349 t60 b2 2			cc4349 t60 b3			cc4349 t60 b3 2			cc4349 t0 b2			cc4349 t0 b2 2			cc4349 t0 b3			cc4349 t0 b3 2			zep b2			zep b2 2			zep b3			zep b3 2
Time (ns)	cc4349 t60 b2	IRF	Time (ns)	cc4349 t60 b2 2	IRF	Time (ns)	cc4349 t60 b3	IRF	Time (ns)	cc4349 t60 b3 2	IRF	Time (ns)	cc4349 t0 b2	IRF	Time (ns)	cc4349 t0 b2 2	IRF	Time (ns)	cc4349 t0 b3	IRF	Time (ns)	cc4349 t0 b3 2	IRF	Time (ns)	zep b2	IRF	Time (ns)	zep b2 2	IRF	Time (ns)	zep b3	IRF	Time (ns)	zep b3 2	IRF
0	0	0	0	0	0	0	0	0	0	0	0	0	0	0	0	0	0	0	0	0	0	0	0	0	0	0	0	0	0	0	0	0	0	0	0
0.01222	0	0	0.01222	0	0	0.01222	0	0	0.01222	0	0	0.01222	0	0	0.01222	0	0	0.01222	0	0	0.01222	0	0	0.01222	0	0	0.01222	0	0	0.01222	0	0	0.01222	0	0
0.02443	0	0	0.02443	0	0	0.02443	0	0	0.02443	0	0	0.02443	0	0	0.02443	0	0	0.02443	0	0	0.02443	0	0	0.02443	0	0	0.02443	0	0	0.02443	0	0	0.02443	0	0
0.03665	0	0	0.03665	0	0	0.03665	0	0	0.03665	0	0	0.03665	0	0	0.03665	0	0	0.03665	0	0	0.03665	0	0	0.03665	0	0	0.03665	0	0	0.03665	0	0	0.03665	0	0
0.04886	0	0	0.04886	0	0	0.04886	0	0	0.04886	0	0	0.04886	0	0	0.04886	0	0	0.04886	0	0	0.04886	0	0	0.04886	0	0	0.04886	0	0	0.04886	0	0	0.04886	0	0
0.06108	0	0	0.06108	0	0	0.06108	0	0	0.06108	0	0	0.06108	0	0	0.06108	0	0	0.06108	0	0	0.06108	0	0	0.06108	0	0	0.06108	0	0	0.06108	0	0	0.06108	0	0
0.07329	0	0	0.07329	0	0	0.07329	0	0	0.07329	0	0	0.07329	0	0	0.07329	0	0	0.07329	0	0	0.07329	0	0	0.07329	0	0	0.07329	0	0	0.07329	0	0	0.07329	0	0
0.08551	0	0	0.08551	0	0	0.08551	0	0	0.08551	0	0	0.08551	0	0	0.08551	0	0	0.08551	0	0	0.08551	0	0	0.08551	0	0	0.08551	0	0	0.08551	0	0	0.08551	0	0
0.09772	0	0	0.09772	0	0	0.09772	0	0	0.09772	0	0	0.09772	0	0	0.09772	0	0	0.09772	0	0	0.09772	0	0	0.09772	0	0	0.09772	0	0	0.09772	0	0	0.09772	0	0
0.10994	0	0	0.10994	0	0	0.10994	0	0	0.10994	0	0	0.10994	0	0	0.10994	0	0	0.10994	0	0	0.10994	0	0	0.10994	0	0	0.10994	0	0	0.10994	0	0	0.10994	0	0
0.12215	0	0	0.12215	0	0	0.12215	0	0	0.12215	0	0	0.12215	0	0	0.12215	0	0	0.12215	0	0	0.12215	0	0	0.12215	0	0	0.12215	0	0	0.12215	0	0	0.12215	0	0
0.13437	0	0	0.13437	0	0	0.13437	0	0	0.13437	0	0	0.13437	0	0	0.13437	0	0	0.13437	0	0	0.13437	0	0	0.13437	0	0	0.13437	0	0	0.13437	0	0	0.13437	0	0
0.14658	0	0	0.14658	0	0	0.14658	0	0	0.14658	0	0	0.14658	0	0	0.14658	0	0	0.14658	0	0	0.14658	0	0	0.14658	0	0	0.14658	0	0	0.14658	0	0	0.14658	0	0
0.1588	0	0	0.1588	0	0	0.1588	0	0	0.1588	0	0	0.1588	0	0	0.1588	0	0	0.1588	0	0	0.1588	0	0	0.1588	0	0	0.1588	0	0	0.1588	0	0	0.1588	0	0
0.17101	0	0	0.17101	0	0	0.17101	0	0	0.17101	0	0	0.17101	0	0	0.17101	0	0	0.17101	0	0	0.17101	0	0	0.17101	0	0	0.17101	0	0	0.17101	0	0	0.17101	0	0
0.18323	0	0	0.18323	0	0	0.18323	0	0	0.18323	0	0	0.18323	0	0	0.18323	0	0	0.18323	0	0	0.18323	0	0	0.18323	0	0	0.18323	0	0	0.18323	0	0	0.18323	0	0
0.19544	0	0	0.19544	0	0	0.19544	0	0	0.19544	0	0	0.19544	0	0	0.19544	0	0	0.19544	0	0	0.19544	0	0	0.19544	0	0	0.19544	0	0	0.19544	0	0	0.19544	0	0
0.20766	0	0	0.20766	0	0	0.20766	0	0	0.20766	0	0	0.20766	0	0	0.20766	0	0	0.20766	0	0	0.20766	0	0	0.20766	0	0	0.20766	0	0	0.20766	0	0	0.20766	0	0
0.21987	0	0	0.21987	0	0	0.21987	0	0	0.21987	0	0	0.21987	0	0	0.21987	0	0	0.21987	0	0	0.21987	0	0	0.21987	0	0	0.21987	0	0	0.21987	0	0	0.21987	0	0
0.23209	0	0	0.23209	0	0	0.23209	0	0	0.23209	0	0	0.23209	0	0	0.23209	0	0	0.23209	0	0	0.23209	0	0	0.23209	0	0	0.23209	0	0	0.23209	0	0	0.23209	0	0
0.2443	0	0	0.2443	0	0	0.2443	0	0	0.2443	0	0	0.2443	0	0	0.2443	0	0	0.2443	0	0	0.2443	0	0	0.2443	0	0	0.2443	0	0	0.2443	0	0	0.2443	0	0
0.25652	0	0	0.25652	0	0	0.25652	0	0	0.25652	0	0	0.25652	0	0	0.25652	0	0	0.25652	0	0	0.25652	0	0	0.25652	0	0	0.25652	0	0	0.25652	0	0	0.25652	0	0
0.26874	0	0	0.26874	0	0	0.26874	0	0	0.26874	0	0	0.26874	0	0	0.26874	0	0	0.26874	0	0	0.26874	0	0	0.26874	0	0	0.26874	0	0	0.26874	0	0	0.26874	0	0
0.28095	0	0	0.28095	0	0	0.28095	0	0	0.28095	0	0	0.28095	0	0	0.28095	0	0	0.28095	0	0	0.28095	0	0	0.28095	0	0	0.28095	0	0	0.28095	0	0	0.28095	0	0
0.29317	0	0	0.29317	0	0	0.29317	0	0	0.29317	0	0	0.29317	0	0	0.29317	0	0	0.29317	0	0	0.29317	0	0	0.29317	0	0	0.29317	0	0	0.29317	0	0	0.29317	0	0
0.30538	0	0	0.30538	0	0	0.30538	0	0	0.30538	0	0	0.30538	0	0	0.30538	0	0	0.30538	0	0	0.30538	0	0	0.30538	0	0	0.30538	0	0	0.30538	0	0	0.30538	0	0
0.3176	0	0	0.3176	0	0	0.3176	0	0	0.3176	0	0	0.3176	0	0	0.3176	0	0	0.3176	0	0	0.3176	0	0	0.3176	0	0	0.3176	0	0	0.3176	0	0	0.3176	0	0
0.32981	0	0	0.32981	0	0	0.32981	0	0	0.32981	0	0	0.32981	0	0	0.32981	0	0	0.32981	0	0	0.32981	0	0	0.32981	0	0	0.32981	0	0	0.32981	0	0	0.32981	0	0
0.34203	0	0	0.34203	0	0	0.34203	0	0	0.34203	0	0	0.34203	0	0	0.34203	0	0	0.34203	0	0	0.34203	0	0	0.34203	0	0	0.34203	0	0	0.34203	0	0	0.34203	0	0
0.35424	0	0	0.35424	0	0	0.35424	0	0	0.35424	0	0	0.35424	0	0	0.35424	0	0	0.35424	0	0	0.35424	0	0	0.35424	0	0	0.35424	0	0	0.35424	0	0	0.35424	0	0
0.36646	0	0	0.36646	0	0	0.36646	0	0	0.36646	0	0	0.36646	0	0	0.36646	0	0	0.36646	0	0	0.36646	0	0	0.36646	0	0	0.36646	0	0	0.36646	0	0	0.36646	0	0
0.37867	0	0	0.37867	0	0	0.37867	0	0	0.37867	0	0	0.37867	0	0	0.37867	0	0	0.37867	0	0	0.37867	0	0	0.37867	0	0	0.37867	0	0	0.37867	0	0	0.37867	0	0
0.39089	0	0	0.39089	0	0	0.39089	0	0	0.39089	0	0	0.39089	0	0	0.39089	0	0	0.39089	0	0	0.39089	0	0	0.39089	0	0	0.39089	0	0	0.39089	0	0	0.39089	0	0
0.4031	0	0	0.4031	0	0	0.4031	0	0	0.4031	0	0	0.4031	0	0	0.4031	0	0	0.4031	0	0	0.4031	0	0	0.4031	0	0	0.4031	0	0	0.4031	0	0	0.4031	0	0
0.41532	0	0	0.41532	0	0	0.41532	0	0	0.41532	0	0	0.41532	0	0	0.41532	0	0	0.41532	0	0	0.41532	0	0	0.41532	0	0	0.41532	0	0	0.41532	0	0	0.41532	0	0
0.42753	0	0	0.42753	0	0	0.42753	0	0	0.42753	0	0	0.42753	0	0	0.42753	0	0	0.42753	0	0	0.42753	0	0	0.42753	0	0	0.42753	0	0	0.42753	0	0	0.42753	0	0
0.43975	0	0	0.43975	0	0	0.43975	0	0	0.43975	0	0	0.43975	0	0	0.43975	0	0	0.43975	0	0	0.43975	0	0	0.43975	0	0	0.43975	0	0	0.43975	0	0	0.43975	0	0
0.45196	0	0	0.45196	0	0	0.45196	0	0	0.45196	0	0	0.45196	0	0	0.45196	0	0	0.45196	0	0	0.45196	0	0	0.45196	0	0	0.45196	0	0	0.45196	0	0	0.45196	0	0
0.46418	0	0	0.46418	0	0	0.46418	0	0	0.46418	0	0	0.46418	0	0	0.46418	0	0	0.46418	0	0	0.46418	0	0	0.46418	0	0	0.46418	0	0	0.46418	0	0	0.46418	0	0
0.47639	0	0	0.47639	0	0	0.47639	0	0	0.47639	0	0	0.47639	0	0	0.47639	0	0	0.47639	0	0	0.47639	0	0	0.47639	0	0	0.47639	0	0	0.47639	0	0	0.47639	0	0
0.48861	0	0	0.48861	0	0	0.48861	0	0	0.48861	0	0	0.48861	0	0	0.48861	0	0	0.48861	0	0	0.48861	0	0	0.48861	0	0	0.48861	0	0	0.48861	0	0	0.48861	0	0
0.50082	0	0	0.50082	0	0	0.50082	0	0	0.50082	0	0	0.50082	0	0	0.50082	0	0	0.50082	0	0	0.50082	0	0	0.50082	0	0	0.50082	0	0	0.50082	0	0	0.50082	0	0
0.51304	0	0	0.51304	0	0	0.51304	0	0	0.51304	0	0	0.51304	0	0	0.51304	0	0	0.51304	0	0	0.51304	0	0	0.51304	0	0	0.51304	0	0	0.51304	0	0	0.51304	0	0
0.52525	0	0	0.52525	0	0	0.52525	0	0	0.52525	0	0	0.52525	0	0	0.52525	0	0	0.52525	0	0	0.52525	0	0	0.52525	0	0	0.52525	0	0	0.52525	0	0	0.52525	0	0
0.53747	0	0	0.53747	0	0	0.53747	0	0	0.53747	0	0	0.53747	0	0	0.53747	0	0	0.53747	0	0	0.53747	0	0	0.53747	0	0	0.53747	0	0	0.53747	0	0	0.53747	0	0
0.54969	0	0	0.54969	0	0	0.54969	0	0	0.54969	0	0	0.54969	0	0	0.54969	0	0	0.54969	0	0	0.54969	0	0	0.54969	0	0	0.54969	0	0	0.54969	0	0	0.54969	0	0
0.5619	0	0	0.5619	0	0	0.5619	0	0	0.5619	0	0	0.5619	0	0	0.5619	0	0	0.5619	0	0	0.5619	0	0	0.5619	0	0	0.5619	0	0	0.5619	0	0	0.5619	0	0
0.57412	0	0	0.57412	0	0	0.57412	0	0	0.57412	0	0	0.57412	0	0	0.57412	0	0	0.57412	0	0	0.57412	0	0	0.57412	0	0	0.57412	0	0	0.57412	0	0	0.57412	0	0
0.58633	0	0	0.58633	0	0	0.58633	0	0	0.58633	0	0	0.58633	0	0	0.58633	0	0	0.58633	0	0	0.58633	0	0	0.58633	0	0	0.58633	0	0	0.58633	0	0	0.58633	0	0
0.59855	0	0	0.59855	0	0	0.59855	0	0	0.59855	0	0	0.59855	0	0	0.59855	0	0	0.59855	0	0	0.59855	0	0	0.59855	0	0	0.59855	0	0	0.59855	0	0	0.59855	0	0
0.61076	0	0	0.61076	0	0	0.61076	0	0	0.61076	0	0	0.61076	0	0	0.61076	0	0	0.61076	0	0	0.61076	0	0	0.61076	0	0	0.61076	0	0	0.61076	0	0	0.61076	0	0
0.62298	0	0	0.62298	0	0	0.62298	0	0	0.62298	0	0	0.62298	0	0	0.62298	0	0	0.62298	0	0	0.62298	0	0	0.62298	0	0	0.62298	0	0	0.62298	0	0	0.62298	0	0
0.63519	0	0	0.63519	0	0	0.63519	0	0	0.63519	0	0	0.63519	0	0	0.63519	0	0	0.63519	0	0	0.63519	0	0	0.63519	0	0	0.63519	0	0	0.63519	0	0	0.63519	0	0
0.64741	0	0	0.64741	0	0	0.64741	0	0	0.64741	0	0	0.64741	0	0	0.64741	0	0	0.64741	0	0	0.64741	0	0	0.64741	0	0	0.64741	0	0	0.64741	0	0	0.64741	0	0
0.65962	0	0	0.65962	0	0	0.65962	0	0	0.65962	0	0	0.65962	0	0	0.65962	0	0	0.65962	0	0	0.65962	0	0	0.65962	0	0	0.65962	0	0	0.65962	0	0	0.65962	0	0
0.67184	0	0	0.67184	0	0	0.67184	0	0	0.67184	0	0	0.67184	0	0	0.67184	0	0	0.67184	0	0	0.67184	0	0	0.67184	0	0	0.67184	0	0	0.67184	0	0	0.67184	0	0
0.68405	0	0	0.68405	0	0	0.68405	0	0	0.68405	0	0	0.68405	0	0	0.68405	0	0	0.68405	0	0	0.68405	0	0	0.68405	0	0	0.68405	0	0	0.68405	0	0	0.68405	0	0
0.69627	0	0	0.69627	0	0	0.69627	0	0	0.69627	0	0	0.69627	0	0	0.69627	0	0	0.69627	0	0	0.69627	0	0	0.69627	0	0	0.69627	0	0	0.69627	0	0	0.69627	0	0
0.70848	0	0	0.70848	0	0	0.70848	0	0	0.70848	0	0	0.70848	0	0	0.70848	0	0	0.70848	0	0	0.70848	0	0	0.70848	0	0	0.70848	0	0	0.70848	0	0	0.70848	0	0
0.7207	0	0	0.7207	0	0	0.7207	0	0	0.7207	0	0	0.7207	0	0	0.7207	0	0	0.7207	0	0	0.7207	0	0	0.7207	0	0	0.7207	0	0	0.7207	0	0	0.7207	0	0
0.73291	0	0	0.73291	0	0	0.73291	0	0	0.73291	0	0	0.73291	0	0	0.73291	0	0	0.73291	0	0	0.73291	0	0	0.73291	0	0	0.73291	0	0	0.73291	0	0	0.73291	0	0
0.74513	0	0	0.74513	0	0	0.74513	0	0	0.74513	0	0	0.74513	0	0	0.74513	0	0	0.74513	0	0	0.74513	0	0	0.74513	0	0	0.74513	0	0	0.74513	0	0	0.74513	0	0
0.75734	0	0	0.75734	0	0	0.75734	0	0	0.75734	0	0	0.75734	0	0	0.75734	0	0	0.75734	0	0	0.75734	0	0	0.75734	0	0	0.75734	0	0	0.75734	0	0	0.75734	0	0
0.76956	0	0	0.76956	0	0	0.76956	0	0	0.76956	0	0	0.76956	0	0	0.76956	0	0	0.76956	0	0	0.76956	0	0	0.76956	0	0	0.76956	0	0	0.76956	0	0	0.76956	0	0
0.78177	0	0	0.78177	0	0	0.78177	0	0	0.78177	0	0	0.78177	0	0	0.78177	0	0	0.78177	0	0	0.78177	0	0	0.78177	0	0	0.78177	0	0	0.78177	0	0	0.78177	0	0
0.79399	0	0	0.79399	0	0	0.79399	0	0	0.79399	0	0	0.79399	0	0	0.79399	0	0	0.79399	0	0	0.79399	0	0	0.79399	0	0	0.79399	0	0	0.79399	0	0	0.79399	0	0
0.80621	0	0	0.80621	0	0	0.80621	0	0	0.80621	0	0	0.80621	0	0	0.80621	0	0	0.80621	0	0	0.80621	0	0	0.80621	0	0	0.80621	0	0	0.80621	0	0	0.80621	0	0
0.81842	0	0	0.81842	0	0	0.81842	0	0	0.81842	0	0	0.81842	0	0	0.81842	0	0	0.81842	0	0	0.81842	0	0	0.81842	0	0	0.81842	0	0	0.81842	0	0	0.81842	0	0
0.83064	0	0	0.83064	0	0	0.83064	0	0	0.83064	0	0	0.83064	0	0	0.83064	0	0	0.83064	0	0	0.83064	0	0	0.83064	0	0	0.83064	0	0	0.83064	0	0	0.83064	0	0
0.84285	0	0	0.84285	0	0	0.84285	0	0	0.84285	0	0	0.84285	0	0	0.84285	0	0	0.84285	0	0	0.84285	0	0	0.84285	0	0	0.84285	0	0	0.84285	0	0	0.84285	0	0
0.85507	0	0	0.85507	0	0	0.85507	0	0	0.85507	0	0	0.85507	0	0	0.85507	0	0	0.85507	0	0	0.85507	0	0	0.85507	0	0	0.85507	0	0	0.85507	0	0	0.85507	0	0
0.86728	0	0	0.86728	0	0	0.86728	0	0	0.86728	0	0	0.86728	0	0	0.86728	0	0	0.86728	0	0	0.86728	0	0	0.86728	0	0	0.86728	0	0	0.86728	0	0	0.86728	0	0
0.8795	0	0	0.8795	0	0	0.8795	0	0	0.8795	0	0	0.8795	0	0	0.8795	0	0	0.8795	0	0	0.8795	0	0	0.8795	0	0	0.8795	0	0	0.8795	0	0	0.8795	0	0
0.89171	0	0	0.89171	0	0	0.89171	0	0	0.89171	0	0	0.89171	0	0	0.89171	0	0	0.89171	0	0	0.89171	0	0	0.89171	0	0	0.89171	0	0	0.89171	0	0	0.89171	0	0
0.90393	0	0	0.90393	0	0	0.90393	0	0	0.90393	0	0	0.90393	0	0	0.90393	0	0	0.90393	0	0	0.90393	0	0	0.90393	0	0	0.90393	0	0	0.90393	0	0	0.90393	0	0
0.91614	0	0	0.91614	0	0	0.91614	0	0	0.91614	0	0	0.91614	0	0	0.91614	0	0	0.91614	0	0	0.91614	0	0	0.91614	0	0	0.91614	0	0	0.91614	0	0	0.91614	0	0
0.92836	0	0	0.92836	0	0	0.92836	0	0	0.92836	0	0	0.92836	0	0	0.92836	0	0	0.92836	0	0	0.92836	0	0	0.92836	0	0	0.92836	0	0	0.92836	0	0	0.92836	0	0
0.94057	0	0	0.94057	0	0	0.94057	0	0	0.94057	0	0	0.94057	0	0	0.94057	0	0	0.94057	0	0	0.94057	0	0	0.94057	0	0	0.94057	0	0	0.94057	0	0	0.94057	0	0
0.95279	0	0	0.95279	0	0	0.95279	0	0	0.95279	0	0	0.95279	0	0	0.95279	0	0	0.95279	0	0	0.95279	0	0	0.95279	0	0	0.95279	0	0	0.95279	0	0	0.95279	0	0
0.965	0	0	0.965	0	0	0.965	0	0	0.965	0	0	0.965	0	0	0.965	0	0	0.965	0	0	0.965	0	0	0.965	0	0	0.965	0	0	0.965	0	0	0.965	0	0
0.97722	0	0	0.97722	0	0	0.97722	0	0	0.97722	0	0	0.97722	0	0	0.97722	0	0	0.97722	0	0	0.97722	0	0	0.97722	0	0	0.97722	0	0	0.97722	0	0	0.97722	0	0
0.98943	0	0	0.98943	0	0	0.98943	0	0	0.98943	0	0	0.98943	0	0	0.98943	0	0	0.98943	0	0	0.98943	0	0	0.98943	0	0	0.98943	0	0	0.98943	0	0	0.98943	0	0
1.00165	0	0	1.00165	0	0	1.00165	0	0	1.00165	0	0	1.00165	0	0	1.00165	0	0	1.00165	0	0	1.00165	0	0	1.00165	0	0	1.00165	0	0	1.00165	0	0	1.00165	0	0
1.01386	0	0	1.01386	0	0	1.01386	0	0	1.01386	0	0	1.01386	0	0	1.01386	0	0	1.01386	0	0	1.01386	0	0	1.01386	0	0	1.01386	0	0	1.01386	0	0	1.01386	0	0
1.02608	0	0	1.02608	0	0	1.02608	0	0	1.02608	0	0	1.02608	0	0	1.02608	0	0	1.02608	0	0	1.02608	0	0	1.02608	0	0	1.02608	0	0	1.02608	0	0	1.02608	0	0
1.03829	0	0	1.03829	0	0	1.03829	0	0	1.03829	0	0	1.03829	0	0	1.03829	0	0	1.03829	0	0	1.03829	0	0	1.03829	0	0	1.03829	0	0	1.03829	0	0	1.03829	0	0
1.05051	0	0	1.05051	0	0	1.05051	0	0	1.05051	0	0	1.05051	0	0	1.05051	0	0	1.05051	0	0	1.05051	0	0	1.05051	0	0	1.05051	0	0	1.05051	0	0	1.05051	0	0
1.06272	0	0	1.06272	0	0	1.06272	0	0	1.06272	0	0	1.06272	0	0	1.06272	0	0	1.06272	0	0	1.06272	0	0	1.06272	0	0	1.06272	0	0	1.06272	0	0	1.06272	0	0
1.07494	0	0	1.07494	0	0	1.07494	0	0	1.07494	0	0	1.07494	0	0	1.07494	0	0	1.07494	0	0	1.07494	0	0	1.07494	0	0	1.07494	0	0	1.07494	0	0	1.07494	0	0
1.08716	0	0	1.08716	0	0	1.08716	0	0	1.08716	0	0	1.08716	0	0	1.08716	0	0	1.08716	0	0	1.08716	0	0	1.08716	0	0	1.08716	0	0	1.08716	0	0	1.08716	0	0
1.09937	0	0	1.09937	0	0	1.09937	0	0	1.09937	0	0	1.09937	0	0	1.09937	0	0	1.09937	0	0	1.09937	0	0	1.09937	0	0	1.09937	0	0	1.09937	0	0	1.09937	0	0
1.11159	0	0	1.11159	0	0	1.11159	0	0	1.11159	0	0	1.11159	0	0	1.11159	0	0	1.11159	0	0	1.11159	0	0	1.11159	0	0	1.11159	0	0	1.11159	0	0	1.11159	0	0
1.1238	0	0	1.1238	0	0	1.1238	0	0	1.1238	0	0	1.1238	0	0	1.1238	0	0	1.1238	0	0	1.1238	0	0	1.1238	0	0	1.1238	0	0	1.1238	0	0	1.1238	0	0
1.13602	0	0	1.13602	0	0	1.13602	0	0	1.13602	0	0	1.13602	0	0	1.13602	0	0	1.13602	0	0	1.13602	0	0	1.13602	0	0	1.13602	0	0	1.13602	0	0	1.13602	0	0
1.14823	0	0	1.14823	0	0	1.14823	0	0	1.14823	0	0	1.14823	0	0	1.14823	0	0	1.14823	0	0	1.14823	0	0	1.14823	0	0	1.14823	0	0	1.14823	0	0	1.14823	0	0
1.16045	0	0	1.16045	0	0	1.16045	0	0	1.16045	0	0	1.16045	0	0	1.16045	0	0	1.16045	0	0	1.16045	0	0	1.16045	0	0	1.16045	0	0	1.16045	0	0	1.16045	0	0
1.17266	0	0	1.17266	0	0	1.17266	0	0	1.17266	0	0	1.17266	0	0	1.17266	0	0	1.17266	0	0	1.17266	0	0	1.17266	0	0	1.17266	0	0	1.17266	0	0	1.17266	0	0
1.18488	0	0	1.18488	0	0	1.18488	0	0	1.18488	0	0	1.18488	0	0	1.18488	0	0	1.18488	0	0	1.18488	0	0	1.18488	0	0	1.18488	0	0	1.18488	0	0	1.18488	0	0
1.19709	0	0	1.19709	0	0	1.19709	0	0	1.19709	0	0	1.19709	0	0	1.19709	0	0	1.19709	0	0	1.19709	0	0	1.19709	0	0	1.19709	0	0	1.19709	0	0	1.19709	0	0
1.20931	0	0	1.20931	0	0	1.20931	0	0	1.20931	0	0	1.20931	0	0	1.20931	0	0	1.20931	0	0	1.20931	0	0	1.20931	0	0	1.20931	0	0	1.20931	0	0	1.20931	0	0
1.22152	0	0	1.22152	0	0	1.22152	0	0	1.22152	0	0	1.22152	0	0	1.22152	0	0	1.22152	0	0	1.22152	0	0	1.22152	0	0	1.22152	0	0	1.22152	0	0	1.22152	0	0
1.23374	0	0	1.23374	0	0	1.23374	0	0	1.23374	0	0	1.23374	0	0	1.23374	0	0	1.23374	0	0	1.23374	0	0	1.23374	0	0	1.23374	0	0	1.23374	0	0	1.23374	0	0
1.24595	0	0	1.24595	0	0	1.24595	0	0	1.24595	0	0	1.24595	0	0	1.24595	0	0	1.24595	0	0	1.24595	0	0	1.24595	0	0	1.24595	0	0	1.24595	0	0	1.24595	0	0
1.25817	0	0	1.25817	0	0	1.25817	0	0	1.25817	0	0	1.25817	0	0	1.25817	0	0	1.25817	0	0	1.25817	0	0	1.25817	0	0	1.25817	0	0	1.25817	0	0	1.25817	0	0
1.27038	0	0	1.27038	0	0	1.27038	0	0	1.27038	0	0	1.27038	0	0	1.27038	0	0	1.27038	0	0	1.27038	0	0	1.27038	0	0	1.27038	0	0	1.27038	0	0	1.27038	0	0
1.2826	0	0	1.2826	0	0	1.2826	0	0	1.2826	0	0	1.2826	0	0	1.2826	0	0	1.2826	0	0	1.2826	0	0	1.2826	0	0	1.2826	0	0	1.2826	0	0	1.2826	0	0
1.29481	0	0	1.29481	0	0	1.29481	0	0	1.29481	0	0	1.29481	0	0	1.29481	0	0	1.29481	0	0	1.29481	0	0	1.29481	0	0	1.29481	0	0	1.29481	0	0	1.29481	0	0
1.30703	0	0	1.30703	0	0	1.30703	0	0	1.30703	0	0	1.30703	0	0	1.30703	0	0	1.30703	0	0	1.30703	0	0	1.30703	0	0	1.30703	0	0	1.30703	0	0	1.30703	0	0
1.31924	0	0	1.31924	0	0	1.31924	0	0	1.31924	0	0	1.31924	0	0	1.31924	0	0	1.31924	0	0	1.31924	0	0	1.31924	0	0	1.31924	0	0	1.31924	0	0	1.31924	0	0
1.33146	0	0	1.33146	0	0	1.33146	0	0	1.33146	0	0	1.33146	0	0	1.33146	0	0	1.33146	0	0	1.33146	0	0	1.33146	0	0	1.33146	0	0	1.33146	0	0	1.33146	0	0
1.34368	0	0	1.34368	0	0	1.34368	0	0	1.34368	0	0	1.34368	0	0	1.34368	0	0	1.34368	0	0	1.34368	0	0	1.34368	0	0	1.34368	0	0	1.34368	0	0	1.34368	0	0
1.35589	0	0	1.35589	0	0	1.35589	0	0	1.35589	0	0	1.35589	0	0	1.35589	0	0	1.35589	0	0	1.35589	0	0	1.35589	0	0	1.35589	0	0	1.35589	0	0	1.35589	0	0
1.36811	0	0	1.36811	0	0	1.36811	0	0	1.36811	0	0	1.36811	0	0	1.36811	0	0	1.36811	0	0	1.36811	0	0	1.36811	0	0	1.36811	0	0	1.36811	0	0	1.36811	0	0
1.38032	0	0	1.38032	0	0	1.38032	0	0	1.38032	0	0	1.38032	0	0	1.38032	0	0	1.38032	0	0	1.38032	0	0	1.38032	0	0	1.38032	0	0	1.38032	0	0	1.38032	0	0
1.39254	0	0	1.39254	0	0	1.39254	0	0	1.39254	0	0	1.39254	0	0	1.39254	0	0	1.39254	0	0	1.39254	0	0	1.39254	0	0	1.39254	0	0	1.39254	0	0	1.39254	0	0
1.40475	0	0	1.40475	0	0	1.40475	0	0	1.40475	0	0	1.40475	0	0	1.40475	0	0	1.40475	0	0	1.40475	0	0	1.40475	0	0	1.40475	0	0	1.40475	0	0	1.40475	0	0
1.41697	0	0	1.41697	0	0	1.41697	0	0	1.41697	0	0	1.41697	0	0	1.41697	0	0	1.41697	0	0	1.41697	0	0	1.41697	0	0	1.41697	0	0	1.41697	0	0	1.41697	0	0
1.42918	0	0	1.42918	0	0	1.42918	0	0	1.42918	0	0	1.42918	0	0	1.42918	0	0	1.42918	0	0	1.42918	0	0	1.42918	0	0	1.42918	0	0	1.42918	0	0	1.42918	0	0
1.4414	0	0	1.4414	0	0	1.4414	0	0	1.4414	0	0	1.4414	0	0	1.4414	0	0	1.4414	0	0	1.4414	0	0	1.4414	0	0	1.4414	0	0	1.4414	0	0	1.4414	0	0
1.45361	0	0	1.45361	0	0	1.45361	0	0	1.45361	0	0	1.45361	0	0	1.45361	0	0	1.45361	0	0	1.45361	0	0	1.45361	0	0	1.45361	0	0	1.45361	0	0	1.45361	0	0
1.46583	0	0	1.46583	0	0	1.46583	0	0	1.46583	0	0	1.46583	0	0	1.46583	0	0	1.46583	0	0	1.46583	0	0	1.46583	0	0	1.46583	0	0	1.46583	0	0	1.46583	0	0
1.47804	0	0	1.47804	0	0	1.47804	0	0	1.47804	0	0	1.47804	0	0	1.47804	0	0	1.47804	0	0	1.47804	0	0	1.47804	0	0	1.47804	0	0	1.47804	0	0	1.47804	0	0
1.49026	0	0	1.49026	0	0	1.49026	0	0	1.49026	0	0	1.49026	0	0	1.49026	0	0	1.49026	0	0	1.49026	0	0	1.49026	0	0	1.49026	0	0	1.49026	0	0	1.49026	0	0
1.50247	0	0	1.50247	0	0	1.50247	0	0	1.50247	0	0	1.50247	0	0	1.50247	0	0	1.50247	0	0	1.50247	0	0	1.50247	0	0	1.50247	0	0	1.50247	0	0	1.50247	0	0
1.51469	0	0	1.51469	0	0	1.51469	0	0	1.51469	0	0	1.51469	0	0	1.51469	0	0	1.51469	0	0	1.51469	0	0	1.51469	0	0	1.51469	0	0	1.51469	0	0	1.51469	0	0
1.5269	0	0	1.5269	0	0	1.5269	0	0	1.5269	0	0	1.5269	0	0	1.5269	0	0	1.5269	0	0	1.5269	0	0	1.5269	0	0	1.5269	0	0	1.5269	0	0	1.5269	0	0
1.53912	0	0	1.53912	0	0	1.53912	0	0	1.53912	0	0	1.53912	0	0	1.53912	0	0	1.53912	0	0	1.53912	0	0	1.53912	0	0	1.53912	0	0	1.53912	0	0	1.53912	0	0
1.55133	0	0	1.55133	0	0	1.55133	0	0	1.55133	0	0	1.55133	0	0	1.55133	0	0	1.55133	0	0	1.55133	0	0	1.55133	0	0	1.55133	0	0	1.55133	0	0	1.55133	0	0
1.56355	0	0	1.56355	0	0	1.56355	0	0	1.56355	0	0	1.56355	0	0	1.56355	0	0	1.56355	0	0	1.56355	0	0	1.56355	0	0	1.56355	0	0	1.56355	0	0	1.56355	0	0
1.57576	0	0	1.57576	0	0	1.57576	0	0	1.57576	0	0	1.57576	0	0	1.57576	0	0	1.57576	0	0	1.57576	0	0	1.57576	0	0	1.57576	0	0	1.57576	0	0	1.57576	0	0
1.58798	0	0	1.58798	0	0	1.58798	0	0	1.58798	0	0	1.58798	0	0	1.58798	0	0	1.58798	0	0	1.58798	0	0	1.58798	0	0	1.58798	0	0	1.58798	0	0	1.58798	0	0
1.60019	0	0	1.60019	0	0	1.60019	0	0	1.60019	0	0	1.60019	0	0	1.60019	0	0	1.60019	0	0	1.60019	0	0	1.60019	0	0	1.60019	0	0	1.60019	0	0	1.60019	0	0
1.61241	0	0	1.61241	0	0	1.61241	0	0	1.61241	0	0	1.61241	0	0	1.61241	0	0	1.61241	0	0	1.61241	0	0	1.61241	0	0	1.61241	0	0	1.61241	0	0	1.61241	0	0
1.62463	0	0	1.62463	0	0	1.62463	0	0	1.62463	0	0	1.62463	0	0	1.62463	0	0	1.62463	0	0	1.62463	0	0	1.62463	0	0	1.62463	0	0	1.62463	0	0	1.62463	0	0
1.63684	0	0	1.63684	0	0	1.63684	0	0	1.63684	0	0	1.63684	0	0	1.63684	0	0	1.63684	0	0	1.63684	0	0	1.63684	0	0	1.63684	0	0	1.63684	0	0	1.63684	0	0
1.64906	0	0	1.64906	0	0	1.64906	0	0	1.64906	0	0	1.64906	0	0	1.64906	0	0	1.64906	0	0	1.64906	0	0	1.64906	0	0	1.64906	0	0	1.64906	0	0	1.64906	0	0
1.66127	0	0	1.66127	0	0	1.66127	0	0	1.66127	0	0	1.66127	0	0	1.66127	0	0	1.66127	0	0	1.66127	0	0	1.66127	0	0	1.66127	0	0	1.66127	0	0	1.66127	0	0
1.67349	0	0	1.67349	0	0	1.67349	0	0	1.67349	0	0	1.67349	0	0	1.67349	0	0	1.67349	0	0	1.67349	0	0	1.67349	0	0	1.67349	0	0	1.67349	0	0	1.67349	0	0
1.6857	0	0	1.6857	0	0	1.6857	0	0	1.6857	0	0	1.6857	0	0	1.6857	0	0	1.6857	0	0	1.6857	0	0	1.6857	0	0	1.6857	0	0	1.6857	0	0	1.6857	0	0
1.69792	0	0	1.69792	0	0	1.69792	0	0	1.69792	0	0	1.69792	0	0	1.69792	0	0	1.69792	0	0	1.69792	0	0	1.69792	0	0	1.69792	0	0	1.69792	0	0	1.69792	0	0
1.71013	0	0	1.71013	0	0	1.71013	0	0	1.71013	0	0	1.71013	0	0	1.71013	0	0	1.71013	0	0	1.71013	0	0	1.71013	0	0	1.71013	0	0	1.71013	0	0	1.71013	0	0
1.72235	0	0	1.72235	0	0	1.72235	0	0	1.72235	0	0	1.72235	0	0	1.72235	0	0	1.72235	0	0	1.72235	0	0	1.72235	0	0	1.72235	0	0	1.72235	0	0	1.72235	0	0
1.73456	0	0	1.73456	0	0	1.73456	0	0	1.73456	0	0	1.73456	0	0	1.73456	0	0	1.73456	0	0	1.73456	0	0	1.73456	0	0	1.73456	0	0	1.73456	0	0	1.73456	0	0
1.74678	0	0	1.74678	0	0	1.74678	0	0	1.74678	0	0	1.74678	0	0	1.74678	0	0	1.74678	0	0	1.74678	0	0	1.74678	0	0	1.74678	0	0	1.74678	0	0	1.74678	0	0
1.75899	0	0	1.75899	0	0	1.75899	0	0	1.75899	0	0	1.75899	0	0	1.75899	0	0	1.75899	0	0	1.75899	0	0	1.75899	0	0	1.75899	0	0	1.75899	0	0	1.75899	0	0
1.77121	0	0	1.77121	0	0	1.77121	0	0	1.77121	0	0	1.77121	0	0	1.77121	0	0	1.77121	0	0	1.77121	0	0	1.77121	0	0	1.77121	0	0	1.77121	0	0	1.77121	0	0
1.78342	0	0	1.78342	0	0	1.78342	0	0	1.78342	0	0	1.78342	0	0	1.78342	0	0	1.78342	0	0	1.78342	0	0	1.78342	0	0	1.78342	0	0	1.78342	0	0	1.78342	0	0
1.79564	0	0	1.79564	0	0	1.79564	0	0	1.79564	0	0	1.79564	0	0	1.79564	0	0	1.79564	0	0	1.79564	0	0	1.79564	0	0	1.79564	0	0	1.79564	0	0	1.79564	0	0
1.80785	0	0	1.80785	0	0	1.80785	0	0	1.80785	0	0	1.80785	0	0	1.80785	0	0	1.80785	0	0	1.80785	0	0	1.80785	0	0	1.80785	0	0	1.80785	0	0	1.80785	0	0
1.82007	0	0	1.82007	0	0	1.82007	0	0	1.82007	0	0	1.82007	0	0	1.82007	0	0	1.82007	0	0	1.82007	0	0	1.82007	0	0	1.82007	0	0	1.82007	0	0	1.82007	0	0
1.83228	0	0	1.83228	0	0	1.83228	0	0	1.83228	0	0	1.83228	0	0	1.83228	0	0	1.83228	0	0	1.83228	0	0	1.83228	0	0	1.83228	0	0	1.83228	0	0	1.83228	0	0
1.8445	0	0	1.8445	0	0	1.8445	0	0	1.8445	0	0	1.8445	0	0	1.8445	0	0	1.8445	0	0	1.8445	0	0	1.8445	0	0	1.8445	0	0	1.8445	0	0	1.8445	0	0
1.85671	0	0	1.85671	0	0	1.85671	0	0	1.85671	0	0	1.85671	0	0	1.85671	0	0	1.85671	0	0	1.85671	0	0	1.85671	0	0	1.85671	0	0	1.85671	0	0	1.85671	0	0
1.86893	0	0	1.86893	0	0	1.86893	0	0	1.86893	0	0	1.86893	0	0	1.86893	0	0	1.86893	0	0	1.86893	0	0	1.86893	0	0	1.86893	0	0	1.86893	0	0	1.86893	0	0
1.88115	0	0	1.88115	0	0	1.88115	0	0	1.88115	0	0	1.88115	0	0	1.88115	0	0	1.88115	0	0	1.88115	0	0	1.88115	0	0	1.88115	0	0	1.88115	0	0	1.88115	0	0
1.89336	0	0	1.89336	0	0	1.89336	0	0	1.89336	0	0	1.89336	0	0	1.89336	0	0	1.89336	0	0	1.89336	0	0	1.89336	0	0	1.89336	0	0	1.89336	0	0	1.89336	0	0
1.90558	0	0	1.90558	0	0	1.90558	0	0	1.90558	0	0	1.90558	0	0	1.90558	0	0	1.90558	0	0	1.90558	0	0	1.90558	0	0	1.90558	0	0	1.90558	0	0	1.90558	0	0
1.91779	0	0	1.91779	0	0	1.91779	0	0	1.91779	0	0	1.91779	0	0	1.91779	0	0	1.91779	0	0	1.91779	0	0	1.91779	0	0	1.91779	0	0	1.91779	0	0	1.91779	0	0
1.93001	0	0	1.93001	0	0	1.93001	0	0	1.93001	0	0	1.93001	0	0	1.93001	0	0	1.93001	0	0	1.93001	0	0	1.93001	0	0	1.93001	0	0	1.93001	0	0	1.93001	0	0
1.94222	0	0	1.94222	0	0	1.94222	0	0	1.94222	0	0	1.94222	0	0	1.94222	0	0	1.94222	0	0	1.94222	0	0	1.94222	0	0	1.94222	0	0	1.94222	0	0	1.94222	0	0
1.95444	0	0	1.95444	0	0	1.95444	0	0	1.95444	0	0	1.95444	0	0	1.95444	0	0	1.95444	0	0	1.95444	0	0	1.95444	0	0	1.95444	0	0	1.95444	0	0	1.95444	0	0
1.96665	0	0	1.96665	0	0	1.96665	0	0	1.96665	0	0	1.96665	0	0	1.96665	0	0	1.96665	0	0	1.96665	0	0	1.96665	0	0	1.96665	0	0	1.96665	0	0	1.96665	0	0
1.97887	0	0	1.97887	0	0	1.97887	0	0	1.97887	0	0	1.97887	0	0	1.97887	0	0	1.97887	0	0	1.97887	0	0	1.97887	0	0	1.97887	0	0	1.97887	0	0	1.97887	0	0
1.99108	0	0	1.99108	0	0	1.99108	0	0	1.99108	0	0	1.99108	0	0	1.99108	0	0	1.99108	0	0	1.99108	0	0	1.99108	0	0	1.99108	0	0	1.99108	0	0	1.99108	0	0
2.0033	0	0	2.0033	0	0	2.0033	0	0	2.0033	0	0	2.0033	0	0	2.0033	0	0	2.0033	0	0	2.0033	0	0	2.0033	0	0	2.0033	0	0	2.0033	0	0	2.0033	0	0
2.01551	0	0	2.01551	0	0	2.01551	0	0	2.01551	0	0	2.01551	0	0	2.01551	0	0	2.01551	0	0	2.01551	0	0	2.01551	0	0	2.01551	0	0	2.01551	0	0	2.01551	0	0
2.02773	0	0	2.02773	0	0	2.02773	0	0	2.02773	0	0	2.02773	0	0	2.02773	0	0	2.02773	0	0	2.02773	0	0	2.02773	0	0	2.02773	0	0	2.02773	0	0	2.02773	0	0
2.03994	0	0	2.03994	0	0	2.03994	0	0	2.03994	0	0	2.03994	0	0	2.03994	0	0	2.03994	0	0	2.03994	0	0	2.03994	0	0	2.03994	0	0	2.03994	0	0	2.03994	0	0
2.05216	0	0	2.05216	0	0	2.05216	0	0	2.05216	0	0	2.05216	0	0	2.05216	0	0	2.05216	0	0	2.05216	0	0	2.05216	0	0	2.05216	0	0	2.05216	0	0	2.05216	0	0
2.06437	0	0	2.06437	0	0	2.06437	0	0	2.06437	0	0	2.06437	0	0	2.06437	0	0	2.06437	0	0	2.06437	0	0	2.06437	0	0	2.06437	0	0	2.06437	0	0	2.06437	0	0
2.07659	0	0	2.07659	0	0	2.07659	0	0	2.07659	0	0	2.07659	0	0	2.07659	0	0	2.07659	0	0	2.07659	0	0	2.07659	0	0	2.07659	0	0	2.07659	0	0	2.07659	0	0
2.0888	0	0	2.0888	0	0	2.0888	0	0	2.0888	0	0	2.0888	0	0	2.0888	0	0	2.0888	0	0	2.0888	0	0	2.0888	0	0	2.0888	0	0	2.0888	0	0	2.0888	0	0
2.10102	0	0	2.10102	0	0	2.10102	0	0	2.10102	0	0	2.10102	0	0	2.10102	0	0	2.10102	0	0	2.10102	0	0	2.10102	0	0	2.10102	0	0	2.10102	0	0	2.10102	0	0
2.11323	0	0	2.11323	0	0	2.11323	0	0	2.11323	0	0	2.11323	0	0	2.11323	0	0	2.11323	0	0	2.11323	0	0	2.11323	0	0	2.11323	0	0	2.11323	0	0	2.11323	0	0
2.12545	0	0	2.12545	0	0	2.12545	0	0	2.12545	0	0	2.12545	0	0	2.12545	0	0	2.12545	0	0	2.12545	0	0	2.12545	0	0	2.12545	0	0	2.12545	0	0	2.12545	0	0
2.13766	0	0	2.13766	0	0	2.13766	0	0	2.13766	0	0	2.13766	0	0	2.13766	0	0	2.13766	0	0	2.13766	0	0	2.13766	0	0	2.13766	0	0	2.13766	0	0	2.13766	0	0
2.14988	0	0	2.14988	0	0	2.14988	0	0	2.14988	0	0	2.14988	0	0	2.14988	0	0	2.14988	0	0	2.14988	0	0	2.14988	0	0	2.14988	0	0	2.14988	0	0	2.14988	0	0
2.1621	0	0	2.1621	0	0	2.1621	0	0	2.1621	0	0	2.1621	0	0	2.1621	0	0	2.1621	0	0	2.1621	0	0	2.1621	0	0	2.1621	0	0	2.1621	0	0	2.1621	0	0
2.17431	0	0	2.17431	0	0	2.17431	0	0	2.17431	0	0	2.17431	0	0	2.17431	0	0	2.17431	0	0	2.17431	0	0	2.17431	0	0	2.17431	0	0	2.17431	0	0	2.17431	0	0
2.18653	0	0	2.18653	0	0	2.18653	0	0	2.18653	0	0	2.18653	0	0	2.18653	0	0	2.18653	0	0	2.18653	0	0	2.18653	0	0	2.18653	0	0	2.18653	0	0	2.18653	0	0
2.19874	0	0	2.19874	0	0	2.19874	0	0	2.19874	0	0	2.19874	0	0	2.19874	0	0	2.19874	0	0	2.19874	0	0	2.19874	0	0	2.19874	0	0	2.19874	0	0	2.19874	0	0
2.21096	0	0	2.21096	0	0	2.21096	0	0	2.21096	0	0	2.21096	0	0	2.21096	0	0	2.21096	0	0	2.21096	0	0	2.21096	0	0	2.21096	0	0	2.21096	0	0	2.21096	0	0
2.22317	0	0	2.22317	0	0	2.22317	0	0	2.22317	0	0	2.22317	0	0	2.22317	0	0	2.22317	0	0	2.22317	0	0	2.22317	0	0	2.22317	0	0	2.22317	0	0	2.22317	0	0
2.23539	0	0	2.23539	0	0	2.23539	0	0	2.23539	0	0	2.23539	0	0	2.23539	0	0	2.23539	0	0	2.23539	0	0	2.23539	0	0	2.23539	0	0	2.23539	0	0	2.23539	0	0
2.2476	0	0	2.2476	0	0	2.2476	0	0	2.2476	0	0	2.2476	0	0	2.2476	0	0	2.2476	0	0	2.2476	0	0	2.2476	0	0	2.2476	0	0	2.2476	0	0	2.2476	0	0
2.25982	0	0	2.25982	0	0	2.25982	0	0	2.25982	0	0	2.25982	0	0	2.25982	0	0	2.25982	0	0	2.25982	0	0	2.25982	0	0	2.25982	0	0	2.25982	0	0	2.25982	0	0
2.27203	0	0	2.27203	0	0	2.27203	0	0	2.27203	0	0	2.27203	0	0	2.27203	0	0	2.27203	0	0	2.27203	0	0	2.27203	0	0	2.27203	0	0	2.27203	0	0	2.27203	0	0
2.28425	0	0	2.28425	0	0	2.28425	0	0	2.28425	0	0	2.28425	0	0	2.28425	0	0	2.28425	0	0	2.28425	0	0	2.28425	0	0	2.28425	0	0	2.28425	0	0	2.28425	0	0
2.29646	0	0	2.29646	0	0	2.29646	0	0	2.29646	0	0	2.29646	0	0	2.29646	0	0	2.29646	0	0	2.29646	0	0	2.29646	0	0	2.29646	0	0	2.29646	0	0	2.29646	0	0
2.30868	0	0	2.30868	0	0	2.30868	0	0	2.30868	0	0	2.30868	0	0	2.30868	0	0	2.30868	0	0	2.30868	0	0	2.30868	0	0	2.30868	0	0	2.30868	0	0	2.30868	0	0
2.32089	0	0	2.32089	0	0	2.32089	0	0	2.32089	0	0	2.32089	0	0	2.32089	0	0	2.32089	0	0	2.32089	0	0	2.32089	0	0	2.32089	0	0	2.32089	0	0	2.32089	0	0
2.33311	0	0	2.33311	0	0	2.33311	0	0	2.33311	0	0	2.33311	0	0	2.33311	0	0	2.33311	0	0	2.33311	0	0	2.33311	0	0	2.33311	0	0	2.33311	0	0	2.33311	0	0
2.34532	0	0	2.34532	0	0	2.34532	0	0	2.34532	0	0	2.34532	0	0	2.34532	0	0	2.34532	0	0	2.34532	0	0	2.34532	0	0	2.34532	0	0	2.34532	0	0	2.34532	0	0
2.35754	0	0	2.35754	0	0	2.35754	0	0	2.35754	0	0	2.35754	0	0	2.35754	0	0	2.35754	0	0	2.35754	0	0	2.35754	0	0	2.35754	0	0	2.35754	0	0	2.35754	0	0
2.36975	0	0	2.36975	0	0	2.36975	0	0	2.36975	0	0	2.36975	0	0	2.36975	0	0	2.36975	0	0	2.36975	0	0	2.36975	0	0	2.36975	0	0	2.36975	0	0	2.36975	0	0
2.38197	0	0	2.38197	0	0	2.38197	0	0	2.38197	0	0	2.38197	0	0	2.38197	0	0	2.38197	0	0	2.38197	0	0	2.38197	0	0	2.38197	0	0	2.38197	0	0	2.38197	0	0
2.39418	0	0	2.39418	0	0	2.39418	0	0	2.39418	0	0	2.39418	0	0	2.39418	0	0	2.39418	0	0	2.39418	0	0	2.39418	0	0	2.39418	0	0	2.39418	0	0	2.39418	0	0
2.4064	0	0	2.4064	0	0	2.4064	0	0	2.4064	0	0	2.4064	0	0	2.4064	0	0	2.4064	0	0	2.4064	0	0	2.4064	0	0	2.4064	0	0	2.4064	0	0	2.4064	0	0
2.41862	0	0	2.41862	0	0	2.41862	0	0	2.41862	0	0	2.41862	0	0	2.41862	0	0	2.41862	0	0	2.41862	0	0	2.41862	0	0	2.41862	0	0	2.41862	0	0	2.41862	0	0
2.43083	0	0	2.43083	0	0	2.43083	0	0	2.43083	0	0	2.43083	0	0	2.43083	0	0	2.43083	0	0	2.43083	0	0	2.43083	0	0	2.43083	0	0	2.43083	0	0	2.43083	0	0
2.44305	0	0	2.44305	0	0	2.44305	0	0	2.44305	0	0	2.44305	0	0	2.44305	0	0	2.44305	0	0	2.44305	0	0	2.44305	0	0	2.44305	0	0	2.44305	0	0	2.44305	0	0
2.45526	0	0	2.45526	0	0	2.45526	0	0	2.45526	0	0	2.45526	0	0	2.45526	0	0	2.45526	0	0	2.45526	0	0	2.45526	0	0	2.45526	0	0	2.45526	0	0	2.45526	0	0
2.46748	0	0	2.46748	0	0	2.46748	0	0	2.46748	0	0	2.46748	0	0	2.46748	0	0	2.46748	0	0	2.46748	0	0	2.46748	0	0	2.46748	0	0	2.46748	0	0	2.46748	0	0
2.47969	0	0	2.47969	0	0	2.47969	0	0	2.47969	0	0	2.47969	0	0	2.47969	0	0	2.47969	0	0	2.47969	0	0	2.47969	0	0	2.47969	0	0	2.47969	0	0	2.47969	0	0
2.49191	0	0	2.49191	0	0	2.49191	0	0	2.49191	0	0	2.49191	0	0	2.49191	0	0	2.49191	0	0	2.49191	0	0	2.49191	0	0	2.49191	0	0	2.49191	0	0	2.49191	0	0
2.50412	0	0	2.50412	0	0	2.50412	0	0	2.50412	0	0	2.50412	0	0	2.50412	0	0	2.50412	0	0	2.50412	0	0	2.50412	0	0	2.50412	0	0	2.50412	0	0	2.50412	0	0
2.51634	0	0	2.51634	0	0	2.51634	0	0	2.51634	0	0	2.51634	0	0	2.51634	0	0	2.51634	0	0	2.51634	0	0	2.51634	0	0	2.51634	0	0	2.51634	0	0	2.51634	0	0
2.52855	0	0	2.52855	0	0	2.52855	0	0	2.52855	0	0	2.52855	0	0	2.52855	0	0	2.52855	0	0	2.52855	0	0	2.52855	0	0	2.52855	0	0	2.52855	0	0	2.52855	0	0
2.54077	4	3	2.54077	3	3	2.54077	5	1	2.54077	0	2	2.54077	3	1	2.54077	2	3	2.54077	2	1	2.54077	3	3	2.54077	4	1	2.54077	5	1	2.54077	4	0	2.54077	1	2
2.55298	2	2	2.55298	2	2	2.55298	1	0	2.55298	3	0	2.55298	2	1	2.55298	4	4	2.55298	2	2	2.55298	3	1	2.55298	4	4	2.55298	2	3	2.55298	4	1	2.55298	4	1
2.5652	2	5	2.5652	4	2	2.5652	5	6	2.5652	1	1	2.5652	4	0	2.5652	4	3	2.5652	1	0	2.5652	3	3	2.5652	4	2	2.5652	2	2	2.5652	0	1	2.5652	1	1
2.57741	3	2	2.57741	5	2	2.57741	2	3	2.57741	0	1	2.57741	1	2	2.57741	4	2	2.57741	2	5	2.57741	3	0	2.57741	1	1	2.57741	2	0	2.57741	2	0	2.57741	3	1
2.58963	7	2	2.58963	4	2	2.58963	2	5	2.58963	0	3	2.58963	3	3	2.58963	4	2	2.58963	5	1	2.58963	5	0	2.58963	5	0	2.58963	4	3	2.58963	0	3	2.58963	4	3
2.60184	2	2	2.60184	2	2	2.60184	3	3	2.60184	4	4	2.60184	2	2	2.60184	3	4	2.60184	3	1	2.60184	0	2	2.60184	2	1	2.60184	1	1	2.60184	1	2	2.60184	4	1
2.61406	1	5	2.61406	5	2	2.61406	1	4	2.61406	3	1	2.61406	3	3	2.61406	4	2	2.61406	1	4	2.61406	2	3	2.61406	1	4	2.61406	4	2	2.61406	1	2	2.61406	0	2
2.62627	1	4	2.62627	1	2	2.62627	2	3	2.62627	2	4	2.62627	0	0	2.62627	2	2	2.62627	8	0	2.62627	2	2	2.62627	1	2	2.62627	4	2	2.62627	1	2	2.62627	1	4
2.63849	2	0	2.63849	3	2	2.63849	1	2	2.63849	4	3	2.63849	3	4	2.63849	2	1	2.63849	1	0	2.63849	3	2	2.63849	0	0	2.63849	0	0	2.63849	2	3	2.63849	1	1
2.6507	2	1	2.6507	2	2	2.6507	2	2	2.6507	1	1	2.6507	0	3	2.6507	1	5	2.6507	1	0	2.6507	7	0	2.6507	2	4	2.6507	5	1	2.6507	2	1	2.6507	2	5
2.66292	2	0	2.66292	2	3	2.66292	2	3	2.66292	1	1	2.66292	0	2	2.66292	2	2	2.66292	3	1	2.66292	1	1	2.66292	2	1	2.66292	1	2	2.66292	3	0	2.66292	1	3
2.67513	5	2	2.67513	1	2	2.67513	1	2	2.67513	2	3	2.67513	2	2	2.67513	1	0	2.67513	3	2	2.67513	0	2	2.67513	2	0	2.67513	4	2	2.67513	1	0	2.67513	5	1
2.68735	1	1	2.68735	0	3	2.68735	3	0	2.68735	2	5	2.68735	0	2	2.68735	4	2	2.68735	2	1	2.68735	3	2	2.68735	0	5	2.68735	3	1	2.68735	3	2	2.68735	5	1
2.69957	6	0	2.69957	2	3	2.69957	4	2	2.69957	1	4	2.69957	3	1	2.69957	2	2	2.69957	3	2	2.69957	0	0	2.69957	3	1	2.69957	3	2	2.69957	0	4	2.69957	3	2
2.71178	3	1	2.71178	2	2	2.71178	0	2	2.71178	3	4	2.71178	3	3	2.71178	0	1	2.71178	5	2	2.71178	5	0	2.71178	3	1	2.71178	2	2	2.71178	1	2	2.71178	4	1
2.724	0	1	2.724	2	3	2.724	2	2	2.724	1	1	2.724	0	0	2.724	1	0	2.724	1	2	2.724	1	1	2.724	3	1	2.724	2	0	2.724	3	1	2.724	0	3
2.73621	1	0	2.73621	2	2	2.73621	3	1	2.73621	2	2	2.73621	1	2	2.73621	3	0	2.73621	3	1	2.73621	1	0	2.73621	2	1	2.73621	1	1	2.73621	5	3	2.73621	2	1
2.74843	4	1	2.74843	2	2	2.74843	2	1	2.74843	1	3	2.74843	2	1	2.74843	0	3	2.74843	4	2	2.74843	4	2	2.74843	3	2	2.74843	1	1	2.74843	0	4	2.74843	5	1
2.76064	5	2	2.76064	3	2	2.76064	4	1	2.76064	5	1	2.76064	3	2	2.76064	1	2	2.76064	1	0	2.76064	3	2	2.76064	2	1	2.76064	2	0	2.76064	3	1	2.76064	3	4
2.77286	3	1	2.77286	3	0	2.77286	4	1	2.77286	0	0	2.77286	3	1	2.77286	2	1	2.77286	4	2	2.77286	4	5	2.77286	2	1	2.77286	5	3	2.77286	1	2	2.77286	1	0
2.78507	2	3	2.78507	1	2	2.78507	1	3	2.78507	2	2	2.78507	2	0	2.78507	4	0	2.78507	4	2	2.78507	4	1	2.78507	3	1	2.78507	3	0	2.78507	0	2	2.78507	4	2
2.79729	2	0	2.79729	4	3	2.79729	5	3	2.79729	3	0	2.79729	2	1	2.79729	0	2	2.79729	0	0	2.79729	1	1	2.79729	3	0	2.79729	3	0	2.79729	0	1	2.79729	1	3
2.8095	6	0	2.8095	1	2	2.8095	3	1	2.8095	5	2	2.8095	4	1	2.8095	5	1	2.8095	1	1	2.8095	3	4	2.8095	3	1	2.8095	1	1	2.8095	3	2	2.8095	2	2
2.82172	4	2	2.82172	3	3	2.82172	4	5	2.82172	4	4	2.82172	2	1	2.82172	1	2	2.82172	2	0	2.82172	3	1	2.82172	2	1	2.82172	2	4	2.82172	2	1	2.82172	1	2
2.83393	3	3	2.83393	4	0	2.83393	3	1	2.83393	2	2	2.83393	2	1	2.83393	1	0	2.83393	2	1	2.83393	2	1	2.83393	3	0	2.83393	0	0	2.83393	1	1	2.83393	3	1
2.84615	7	2	2.84615	3	2	2.84615	3	3	2.84615	2	3	2.84615	0	1	2.84615	0	2	2.84615	2	1	2.84615	2	5	2.84615	1	0	2.84615	3	1	2.84615	4	1	2.84615	1	2
2.85836	1	2	2.85836	2	0	2.85836	2	2	2.85836	4	0	2.85836	3	3	2.85836	5	2	2.85836	3	3	2.85836	2	2	2.85836	3	0	2.85836	3	3	2.85836	4	3	2.85836	3	1
2.87058	3	2	2.87058	2	1	2.87058	2	1	2.87058	2	1	2.87058	2	1	2.87058	5	1	2.87058	2	1	2.87058	0	2	2.87058	1	0	2.87058	0	4	2.87058	2	1	2.87058	2	2
2.88279	1	2	2.88279	1	1	2.88279	1	3	2.88279	1	3	2.88279	2	5	2.88279	1	3	2.88279	3	1	2.88279	4	3	2.88279	0	0	2.88279	2	1	2.88279	1	1	2.88279	3	2
2.89501	3	2	2.89501	3	2	2.89501	2	1	2.89501	0	3	2.89501	2	1	2.89501	3	2	2.89501	2	3	2.89501	0	2	2.89501	1	3	2.89501	2	1	2.89501	3	1	2.89501	1	2
2.90722	2	5	2.90722	6	5	2.90722	1	2	2.90722	2	1	2.90722	2	1	2.90722	4	2	2.90722	1	1	2.90722	3	0	2.90722	4	0	2.90722	3	2	2.90722	4	3	2.90722	0	1
2.91944	2	1	2.91944	0	4	2.91944	3	3	2.91944	1	4	2.91944	1	2	2.91944	4	2	2.91944	4	2	2.91944	2	2	2.91944	3	1	2.91944	0	1	2.91944	0	1	2.91944	3	1
2.93165	6	1	2.93165	2	2	2.93165	3	1	2.93165	0	2	2.93165	0	1	2.93165	2	3	2.93165	1	3	2.93165	3	0	2.93165	2	2	2.93165	2	0	2.93165	1	1	2.93165	2	4
2.94387	0	3	2.94387	1	2	2.94387	2	1	2.94387	8	2	2.94387	2	2	2.94387	3	1	2.94387	2	0	2.94387	4	3	2.94387	2	3	2.94387	5	1	2.94387	3	2	2.94387	5	1
2.95609	3	2	2.95609	5	2	2.95609	3	0	2.95609	1	2	2.95609	3	1	2.95609	2	1	2.95609	2	0	2.95609	1	2	2.95609	2	1	2.95609	2	3	2.95609	3	1	2.95609	1	3
2.9683	4	2	2.9683	3	2	2.9683	2	1	2.9683	1	0	2.9683	6	0	2.9683	1	4	2.9683	1	3	2.9683	3	2	2.9683	2	1	2.9683	1	1	2.9683	3	1	2.9683	1	0
2.98052	1	1	2.98052	2	1	2.98052	2	2	2.98052	1	2	2.98052	0	2	2.98052	2	1	2.98052	2	1	2.98052	4	0	2.98052	2	1	2.98052	4	3	2.98052	4	1	2.98052	1	2
2.99273	1	1	2.99273	5	4	2.99273	0	2	2.99273	2	2	2.99273	0	1	2.99273	1	2	2.99273	1	5	2.99273	2	0	2.99273	2	4	2.99273	2	0	2.99273	2	2	2.99273	2	0
3.00495	1	1	3.00495	4	1	3.00495	2	4	3.00495	4	3	3.00495	3	4	3.00495	2	2	3.00495	3	2	3.00495	1	1	3.00495	2	2	3.00495	5	1	3.00495	1	1	3.00495	2	1
3.01716	1	3	3.01716	2	5	3.01716	3	2	3.01716	1	3	3.01716	2	2	3.01716	2	1	3.01716	4	1	3.01716	2	2	3.01716	1	4	3.01716	4	1	3.01716	2	3	3.01716	7	1
3.02938	1	1	3.02938	1	2	3.02938	4	2	3.02938	3	3	3.02938	3	2	3.02938	1	0	3.02938	1	2	3.02938	4	2	3.02938	1	1	3.02938	2	4	3.02938	1	1	3.02938	5	4
3.04159	3	0	3.04159	3	1	3.04159	1	2	3.04159	2	7	3.04159	4	1	3.04159	2	2	3.04159	1	2	3.04159	4	0	3.04159	1	0	3.04159	2	3	3.04159	3	0	3.04159	3	1
3.05381	1	0	3.05381	1	3	3.05381	2	4	3.05381	1	5	3.05381	4	2	3.05381	3	1	3.05381	0	3	3.05381	1	1	3.05381	2	2	3.05381	3	0	3.05381	3	1	3.05381	2	3
3.06602	1	2	3.06602	4	1	3.06602	0	4	3.06602	0	2	3.06602	2	3	3.06602	1	1	3.06602	5	1	3.06602	2	2	3.06602	4	4	3.06602	4	3	3.06602	2	1	3.06602	2	2
3.07824	3	2	3.07824	2	2	3.07824	4	0	3.07824	4	3	3.07824	0	2	3.07824	1	2	3.07824	5	2	3.07824	2	3	3.07824	1	4	3.07824	3	5	3.07824	2	3	3.07824	2	4
3.09045	6	1	3.09045	1	1	3.09045	1	0	3.09045	5	1	3.09045	2	3	3.09045	4	2	3.09045	1	3	3.09045	2	3	3.09045	7	1	3.09045	2	4	3.09045	3	1	3.09045	3	0
3.10267	3	0	3.10267	3	3	3.10267	2	4	3.10267	0	3	3.10267	1	2	3.10267	3	3	3.10267	3	3	3.10267	3	1	3.10267	1	1	3.10267	5	1	3.10267	3	0	3.10267	1	3
3.11488	2	4	3.11488	2	1	3.11488	3	7	3.11488	1	0	3.11488	4	0	3.11488	1	4	3.11488	0	0	3.11488	4	2	3.11488	2	1	3.11488	2	4	3.11488	0	2	3.11488	0	0
3.1271	1	2	3.1271	0	3	3.1271	7	5	3.1271	2	1	3.1271	1	0	3.1271	2	1	3.1271	1	2	3.1271	1	1	3.1271	4	2	3.1271	1	2	3.1271	2	1	3.1271	3	1
3.13931	5	1	3.13931	3	1	3.13931	1	2	3.13931	0	5	3.13931	1	1	3.13931	3	3	3.13931	1	2	3.13931	3	1	3.13931	8	1	3.13931	2	0	3.13931	0	2	3.13931	3	4
3.15153	3	1	3.15153	4	6	3.15153	2	1	3.15153	2	1	3.15153	2	2	3.15153	1	0	3.15153	1	0	3.15153	2	0	3.15153	2	1	3.15153	2	2	3.15153	4	2	3.15153	2	3
3.16374	0	1	3.16374	1	5	3.16374	1	0	3.16374	1	0	3.16374	0	3	3.16374	6	3	3.16374	3	3	3.16374	4	3	3.16374	2	1	3.16374	2	1	3.16374	0	2	3.16374	2	1
3.17596	2	1	3.17596	1	2	3.17596	2	0	3.17596	2	1	3.17596	3	3	3.17596	1	1	3.17596	3	1	3.17596	4	0	3.17596	4	2	3.17596	1	3	3.17596	1	3	3.17596	1	1
3.18817	1	2	3.18817	2	4	3.18817	1	4	3.18817	4	0	3.18817	4	0	3.18817	6	3	3.18817	0	0	3.18817	4	0	3.18817	1	2	3.18817	1	1	3.18817	5	6	3.18817	2	5
3.20039	1	2	3.20039	3	1	3.20039	5	0	3.20039	2	0	3.20039	1	0	3.20039	3	4	3.20039	4	1	3.20039	4	0	3.20039	3	3	3.20039	3	0	3.20039	0	3	3.20039	1	2
3.2126	4	2	3.2126	3	0	3.2126	2	4	3.2126	3	3	3.2126	2	3	3.2126	3	1	3.2126	3	3	3.2126	4	2	3.2126	3	0	3.2126	4	4	3.2126	0	1	3.2126	0	3
3.22482	2	1	3.22482	2	2	3.22482	3	1	3.22482	2	3	3.22482	2	2	3.22482	2	4	3.22482	2	2	3.22482	2	1	3.22482	1	3	3.22482	5	1	3.22482	0	2	3.22482	3	3
3.23704	1	0	3.23704	3	0	3.23704	1	1	3.23704	3	3	3.23704	2	0	3.23704	3	0	3.23704	1	1	3.23704	7	4	3.23704	2	1	3.23704	1	1	3.23704	2	3	3.23704	3	3
3.24925	2	1	3.24925	4	1	3.24925	2	1	3.24925	5	1	3.24925	1	4	3.24925	2	4	3.24925	1	2	3.24925	1	1	3.24925	4	1	3.24925	4	0	3.24925	1	2	3.24925	3	2
3.26147	1	3	3.26147	1	2	3.26147	2	2	3.26147	0	1	3.26147	2	3	3.26147	3	1	3.26147	1	0	3.26147	4	0	3.26147	2	1	3.26147	6	1	3.26147	0	3	3.26147	8	1
3.27368	2	1	3.27368	2	2	3.27368	4	5	3.27368	0	1	3.27368	1	5	3.27368	2	4	3.27368	4	2	3.27368	1	1	3.27368	4	1	3.27368	3	1	3.27368	2	2	3.27368	4	2
3.2859	3	2	3.2859	2	1	3.2859	2	0	3.2859	3	0	3.2859	1	1	3.2859	0	0	3.2859	5	2	3.2859	3	1	3.2859	3	3	3.2859	3	1	3.2859	2	4	3.2859	1	4
3.29811	0	3	3.29811	2	2	3.29811	3	3	3.29811	0	3	3.29811	1	5	3.29811	1	4	3.29811	0	2	3.29811	3	1	3.29811	3	0	3.29811	2	1	3.29811	2	5	3.29811	1	3
3.31033	1	4	3.31033	2	3	3.31033	0	5	3.31033	3	2	3.31033	0	1	3.31033	0	2	3.31033	1	2	3.31033	5	2	3.31033	2	1	3.31033	0	2	3.31033	1	2	3.31033	1	2
3.32254	1	2	3.32254	2	2	3.32254	1	0	3.32254	2	5	3.32254	1	3	3.32254	4	0	3.32254	1	2	3.32254	3	3	3.32254	0	1	3.32254	0	2	3.32254	0	1	3.32254	4	1
3.33476	2	2	3.33476	4	2	3.33476	3	2	3.33476	3	4	3.33476	0	3	3.33476	2	0	3.33476	6	3	3.33476	2	0	3.33476	0	3	3.33476	2	0	3.33476	3	1	3.33476	2	1
3.34697	3	2	3.34697	2	4	3.34697	1	4	3.34697	3	2	3.34697	3	0	3.34697	1	1	3.34697	1	1	3.34697	2	0	3.34697	3	2	3.34697	3	0	3.34697	2	1	3.34697	2	0
3.35919	3	2	3.35919	5	0	3.35919	3	1	3.35919	3	0	3.35919	3	2	3.35919	4	1	3.35919	3	3	3.35919	1	2	3.35919	2	1	3.35919	2	1	3.35919	0	1	3.35919	1	2
3.3714	2	0	3.3714	2	1	3.3714	2	2	3.3714	2	4	3.3714	3	3	3.3714	1	3	3.3714	3	2	3.3714	1	0	3.3714	2	4	3.3714	3	5	3.3714	3	3	3.3714	0	3
3.38362	2	5	3.38362	3	1	3.38362	1	3	3.38362	4	1	3.38362	2	1	3.38362	3	1	3.38362	5	1	3.38362	0	1	3.38362	3	3	3.38362	1	3	3.38362	1	3	3.38362	2	1
3.39583	1	1	3.39583	3	0	3.39583	2	1	3.39583	1	0	3.39583	1	2	3.39583	2	2	3.39583	2	3	3.39583	3	3	3.39583	1	1	3.39583	1	0	3.39583	4	1	3.39583	2	2
3.40805	2	1	3.40805	2	0	3.40805	1	0	3.40805	1	3	3.40805	0	1	3.40805	2	2	3.40805	2	2	3.40805	1	2	3.40805	3	0	3.40805	4	0	3.40805	2	2	3.40805	0	5
3.42026	4	2	3.42026	4	1	3.42026	0	0	3.42026	0	1	3.42026	4	1	3.42026	4	2	3.42026	2	8	3.42026	3	1	3.42026	1	0	3.42026	0	3	3.42026	2	1	3.42026	3	4
3.43248	2	2	3.43248	4	2	3.43248	4	1	3.43248	1	3	3.43248	2	1	3.43248	1	1	3.43248	0	2	3.43248	2	4	3.43248	2	0	3.43248	2	1	3.43248	2	1	3.43248	1	1
3.44469	5	1	3.44469	3	2	3.44469	3	1	3.44469	0	3	3.44469	2	0	3.44469	3	1	3.44469	3	2	3.44469	3	2	3.44469	2	1	3.44469	0	2	3.44469	2	1	3.44469	3	0
3.45691	0	1	3.45691	2	1	3.45691	1	1	3.45691	2	3	3.45691	1	0	3.45691	1	0	3.45691	2	5	3.45691	5	3	3.45691	2	1	3.45691	1	0	3.45691	4	2	3.45691	1	3
3.46912	2	2	3.46912	3	1	3.46912	2	1	3.46912	3	1	3.46912	4	1	3.46912	0	0	3.46912	4	1	3.46912	1	1	3.46912	2	2	3.46912	0	3	3.46912	2	2	3.46912	0	2
3.48134	2	3	3.48134	2	3	3.48134	1	4	3.48134	1	2	3.48134	5	3	3.48134	0	0	3.48134	4	3	3.48134	4	0	3.48134	2	2	3.48134	2	1	3.48134	1	2	3.48134	4	2
3.49356	3	0	3.49356	2	0	3.49356	5	5	3.49356	2	0	3.49356	2	3	3.49356	2	0	3.49356	0	1	3.49356	3	0	3.49356	1	0	3.49356	1	1	3.49356	1	2	3.49356	2	0
3.50577	1	3	3.50577	3	4	3.50577	3	6	3.50577	2	4	3.50577	0	2	3.50577	2	1	3.50577	2	1	3.50577	1	2	3.50577	3	1	3.50577	1	1	3.50577	1	1	3.50577	3	4
3.51799	1	0	3.51799	3	0	3.51799	2	1	3.51799	1	1	3.51799	1	3	3.51799	4	1	3.51799	2	2	3.51799	2	2	3.51799	1	2	3.51799	4	0	3.51799	2	0	3.51799	0	0
3.5302	1	1	3.5302	1	1	3.5302	6	1	3.5302	2	1	3.5302	3	3	3.5302	2	3	3.5302	1	3	3.5302	1	1	3.5302	5	5	3.5302	4	1	3.5302	0	1	3.5302	2	1
3.54242	3	0	3.54242	5	1	3.54242	2	2	3.54242	2	1	3.54242	1	1	3.54242	1	1	3.54242	4	6	3.54242	2	1	3.54242	3	2	3.54242	2	1	3.54242	3	2	3.54242	2	0
3.55463	2	0	3.55463	3	1	3.55463	3	1	3.55463	2	1	3.55463	4	3	3.55463	5	8	3.55463	6	1	3.55463	1	4	3.55463	6	2	3.55463	2	0	3.55463	5	4	3.55463	1	0
3.56685	1	3	3.56685	2	0	3.56685	3	3	3.56685	3	2	3.56685	2	1	3.56685	1	0	3.56685	0	2	3.56685	2	1	3.56685	2	1	3.56685	2	1	3.56685	0	2	3.56685	1	0
3.57906	1	1	3.57906	1	3	3.57906	5	2	3.57906	2	1	3.57906	3	2	3.57906	1	1	3.57906	4	2	3.57906	2	4	3.57906	5	0	3.57906	2	2	3.57906	4	0	3.57906	4	3
3.59128	1	3	3.59128	1	2	3.59128	3	1	3.59128	2	4	3.59128	3	2	3.59128	3	2	3.59128	1	2	3.59128	0	0	3.59128	4	1	3.59128	3	6	3.59128	3	1	3.59128	0	2
3.60349	3	6	3.60349	2	2	3.60349	4	1	3.60349	1	1	3.60349	2	4	3.60349	1	1	3.60349	0	2	3.60349	1	4	3.60349	2	1	3.60349	4	1	3.60349	0	0	3.60349	2	1
3.61571	4	1	3.61571	1	2	3.61571	1	4	3.61571	2	2	3.61571	4	4	3.61571	7	1	3.61571	4	4	3.61571	1	0	3.61571	2	3	3.61571	1	5	3.61571	5	2	3.61571	1	4
3.62792	2	2	3.62792	1	1	3.62792	1	5	3.62792	1	2	3.62792	2	3	3.62792	2	4	3.62792	3	2	3.62792	0	1	3.62792	1	1	3.62792	1	0	3.62792	1	1	3.62792	1	0
3.64014	2	0	3.64014	3	1	3.64014	2	1	3.64014	0	0	3.64014	1	3	3.64014	3	0	3.64014	5	2	3.64014	2	2	3.64014	0	3	3.64014	1	2	3.64014	4	2	3.64014	3	2
3.65235	3	0	3.65235	1	0	3.65235	3	3	3.65235	2	2	3.65235	1	0	3.65235	2	0	3.65235	2	3	3.65235	2	4	3.65235	2	3	3.65235	1	1	3.65235	2	2	3.65235	4	2
3.66457	1	1	3.66457	5	2	3.66457	3	2	3.66457	1	3	3.66457	2	2	3.66457	2	2	3.66457	1	1	3.66457	4	1	3.66457	3	1	3.66457	3	0	3.66457	3	2	3.66457	3	3
3.67678	1	1	3.67678	1	0	3.67678	4	5	3.67678	2	1	3.67678	1	0	3.67678	1	0	3.67678	3	2	3.67678	2	2	3.67678	3	0	3.67678	2	3	3.67678	2	1	3.67678	3	3
3.689	2	1	3.689	2	3	3.689	1	3	3.689	0	1	3.689	4	1	3.689	1	1	3.689	1	4	3.689	0	2	3.689	0	1	3.689	3	1	3.689	1	0	3.689	5	2
3.70121	1	3	3.70121	0	2	3.70121	3	1	3.70121	1	0	3.70121	2	0	3.70121	4	1	3.70121	2	3	3.70121	2	1	3.70121	0	2	3.70121	1	4	3.70121	2	3	3.70121	3	0
3.71343	2	3	3.71343	2	2	3.71343	2	1	3.71343	2	2	3.71343	1	3	3.71343	2	1	3.71343	2	1	3.71343	3	0	3.71343	1	2	3.71343	2	1	3.71343	4	4	3.71343	0	1
3.72564	2	0	3.72564	1	0	3.72564	1	5	3.72564	0	1	3.72564	2	1	3.72564	3	1	3.72564	0	1	3.72564	1	0	3.72564	2	2	3.72564	1	1	3.72564	3	3	3.72564	3	1
3.73786	0	2	3.73786	3	3	3.73786	2	3	3.73786	1	1	3.73786	3	0	3.73786	1	1	3.73786	2	0	3.73786	0	0	3.73786	3	0	3.73786	0	0	3.73786	2	1	3.73786	1	2
3.75007	3	3	3.75007	3	0	3.75007	2	2	3.75007	2	0	3.75007	0	0	3.75007	1	2	3.75007	2	0	3.75007	0	1	3.75007	2	2	3.75007	1	1	3.75007	3	2	3.75007	2	2
3.76229	2	2	3.76229	2	0	3.76229	3	1	3.76229	3	2	3.76229	2	3	3.76229	0	2	3.76229	3	4	3.76229	2	2	3.76229	7	3	3.76229	1	3	3.76229	3	2	3.76229	1	4
3.77451	5	3	3.77451	1	4	3.77451	4	4	3.77451	1	1	3.77451	3	1	3.77451	1	0	3.77451	1	0	3.77451	3	2	3.77451	4	0	3.77451	2	1	3.77451	5	0	3.77451	4	2
3.78672	3	3	3.78672	2	1	3.78672	1	1	3.78672	2	3	3.78672	1	2	3.78672	1	0	3.78672	1	3	3.78672	1	2	3.78672	2	1	3.78672	1	2	3.78672	1	2	3.78672	0	3
3.79894	0	1	3.79894	2	4	3.79894	3	3	3.79894	3	3	3.79894	1	4	3.79894	2	0	3.79894	1	2	3.79894	3	0	3.79894	1	1	3.79894	1	2	3.79894	5	1	3.79894	1	3
3.81115	1	1	3.81115	0	2	3.81115	3	1	3.81115	0	2	3.81115	2	0	3.81115	0	0	3.81115	2	1	3.81115	1	4	3.81115	1	0	3.81115	3	2	3.81115	1	4	3.81115	4	1
3.82337	2	1	3.82337	6	2	3.82337	5	3	3.82337	0	2	3.82337	2	1	3.82337	2	4	3.82337	3	2	3.82337	5	1	3.82337	1	2	3.82337	2	2	3.82337	2	1	3.82337	3	4
3.83558	1	2	3.83558	3	1	3.83558	2	5	3.83558	2	1	3.83558	0	1	3.83558	4	3	3.83558	0	3	3.83558	4	3	3.83558	2	0	3.83558	2	3	3.83558	1	3	3.83558	2	2
3.8478	6	2	3.8478	0	2	3.8478	1	2	3.8478	1	2	3.8478	2	2	3.8478	1	0	3.8478	3	2	3.8478	1	3	3.8478	3	3	3.8478	0	3	3.8478	4	3	3.8478	1	2
3.86001	2	3	3.86001	4	2	3.86001	3	1	3.86001	1	4	3.86001	1	1	3.86001	3	4	3.86001	1	3	3.86001	3	2	3.86001	2	0	3.86001	2	3	3.86001	7	4	3.86001	1	2
3.87223	6	2	3.87223	1	1	3.87223	3	2	3.87223	3	1	3.87223	2	0	3.87223	1	0	3.87223	3	1	3.87223	0	0	3.87223	3	2	3.87223	4	2	3.87223	6	1	3.87223	2	4
3.88444	1	2	3.88444	3	1	3.88444	0	1	3.88444	1	3	3.88444	2	2	3.88444	2	2	3.88444	3	2	3.88444	1	0	3.88444	4	1	3.88444	1	0	3.88444	1	0	3.88444	2	1
3.89666	2	4	3.89666	1	6	3.89666	0	3	3.89666	1	2	3.89666	3	0	3.89666	0	2	3.89666	0	4	3.89666	1	1	3.89666	5	5	3.89666	4	2	3.89666	3	2	3.89666	2	2
3.90887	1	1	3.90887	0	0	3.90887	2	2	3.90887	2	4	3.90887	4	2	3.90887	2	2	3.90887	3	0	3.90887	1	1	3.90887	1	2	3.90887	1	2	3.90887	2	0	3.90887	4	2
3.92109	4	3	3.92109	1	4	3.92109	1	0	3.92109	3	1	3.92109	4	3	3.92109	7	2	3.92109	3	2	3.92109	4	0	3.92109	3	1	3.92109	0	4	3.92109	2	2	3.92109	3	4
3.9333	0	2	3.9333	1	1	3.9333	1	1	3.9333	0	2	3.9333	3	4	3.9333	2	2	3.9333	2	2	3.9333	2	0	3.9333	1	0	3.9333	5	3	3.9333	2	3	3.9333	1	2
3.94552	0	4	3.94552	2	1	3.94552	2	0	3.94552	2	0	3.94552	4	4	3.94552	2	2	3.94552	0	1	3.94552	2	2	3.94552	2	2	3.94552	1	0	3.94552	2	0	3.94552	3	1
3.95773	5	6	3.95773	1	2	3.95773	1	1	3.95773	2	1	3.95773	0	1	3.95773	4	1	3.95773	0	1	3.95773	1	5	3.95773	1	4	3.95773	3	2	3.95773	2	1	3.95773	5	0
3.96995	3	1	3.96995	3	1	3.96995	1	0	3.96995	3	3	3.96995	1	0	3.96995	1	3	3.96995	3	2	3.96995	4	4	3.96995	1	3	3.96995	1	3	3.96995	3	1	3.96995	4	0
3.98216	4	3	3.98216	3	1	3.98216	3	3	3.98216	0	3	3.98216	3	2	3.98216	1	2	3.98216	3	1	3.98216	0	1	3.98216	2	2	3.98216	7	3	3.98216	4	6	3.98216	4	2
3.99438	5	1	3.99438	0	1	3.99438	2	3	3.99438	1	3	3.99438	2	4	3.99438	1	0	3.99438	5	3	3.99438	4	2	3.99438	2	2	3.99438	3	0	3.99438	0	1	3.99438	2	1
4.00659	1	0	4.00659	0	1	4.00659	2	1	4.00659	3	1	4.00659	2	3	4.00659	0	1	4.00659	2	1	4.00659	1	3	4.00659	2	2	4.00659	3	2	4.00659	3	1	4.00659	2	1
4.01881	2	1	4.01881	4	1	4.01881	8	1	4.01881	6	2	4.01881	3	2	4.01881	5	2	4.01881	2	1	4.01881	1	0	4.01881	1	2	4.01881	0	1	4.01881	3	1	4.01881	3	2
4.03103	5	1	4.03103	1	0	4.03103	4	4	4.03103	2	0	4.03103	3	3	4.03103	1	2	4.03103	1	1	4.03103	1	1	4.03103	2	3	4.03103	1	0	4.03103	1	1	4.03103	0	2
4.04324	2	2	4.04324	1	1	4.04324	1	3	4.04324	2	1	4.04324	1	1	4.04324	5	3	4.04324	6	2	4.04324	3	1	4.04324	1	1	4.04324	3	2	4.04324	0	2	4.04324	4	1
4.05546	1	1	4.05546	2	1	4.05546	0	1	4.05546	3	1	4.05546	0	2	4.05546	1	1	4.05546	4	2	4.05546	2	0	4.05546	1	2	4.05546	1	2	4.05546	2	2	4.05546	3	2
4.06767	1	3	4.06767	1	0	4.06767	4	0	4.06767	1	0	4.06767	7	1	4.06767	2	2	4.06767	1	1	4.06767	0	1	4.06767	1	1	4.06767	2	1	4.06767	2	2	4.06767	1	1
4.07989	2	4	4.07989	2	0	4.07989	1	0	4.07989	1	0	4.07989	5	1	4.07989	2	6	4.07989	1	3	4.07989	3	0	4.07989	3	0	4.07989	2	1	4.07989	1	0	4.07989	1	1
4.0921	3	1	4.0921	6	2	4.0921	1	1	4.0921	2	5	4.0921	5	0	4.0921	2	1	4.0921	3	1	4.0921	4	2	4.0921	2	1	4.0921	3	2	4.0921	0	1	4.0921	1	2
4.10432	2	1	4.10432	3	1	4.10432	3	3	4.10432	1	1	4.10432	3	2	4.10432	2	1	4.10432	2	3	4.10432	2	2	4.10432	3	1	4.10432	5	0	4.10432	2	3	4.10432	3	5
4.11653	0	0	4.11653	1	0	4.11653	5	3	4.11653	4	2	4.11653	3	0	4.11653	2	2	4.11653	4	4	4.11653	2	0	4.11653	0	1	4.11653	2	0	4.11653	2	1	4.11653	1	0
4.12875	2	2	4.12875	1	3	4.12875	2	1	4.12875	5	2	4.12875	3	1	4.12875	2	4	4.12875	1	0	4.12875	1	1	4.12875	2	1	4.12875	4	2	4.12875	2	4	4.12875	0	2
4.14096	1	6	4.14096	1	3	4.14096	2	1	4.14096	1	2	4.14096	2	2	4.14096	3	2	4.14096	0	2	4.14096	2	2	4.14096	3	1	4.14096	0	0	4.14096	1	1	4.14096	2	0
4.15318	4	1	4.15318	2	3	4.15318	0	2	4.15318	3	1	4.15318	1	2	4.15318	2	2	4.15318	1	5	4.15318	5	4	4.15318	1	1	4.15318	0	0	4.15318	2	2	4.15318	2	2
4.16539	4	2	4.16539	1	5	4.16539	1	1	4.16539	1	3	4.16539	3	2	4.16539	2	0	4.16539	1	5	4.16539	0	0	4.16539	2	1	4.16539	3	2	4.16539	1	0	4.16539	2	2
4.17761	3	2	4.17761	4	1	4.17761	3	2	4.17761	0	5	4.17761	1	1	4.17761	6	2	4.17761	1	0	4.17761	2	1	4.17761	2	2	4.17761	2	0	4.17761	4	3	4.17761	2	3
4.18982	2	1	4.18982	0	1	4.18982	5	4	4.18982	3	1	4.18982	1	0	4.18982	2	1	4.18982	0	0	4.18982	3	2	4.18982	3	4	4.18982	7	4	4.18982	2	4	4.18982	4	4
4.20204	1	1	4.20204	4	0	4.20204	1	2	4.20204	2	2	4.20204	2	1	4.20204	2	2	4.20204	0	1	4.20204	1	3	4.20204	2	1	4.20204	5	4	4.20204	0	1	4.20204	2	2
4.21425	3	3	4.21425	3	3	4.21425	1	1	4.21425	3	4	4.21425	5	1	4.21425	1	0	4.21425	1	0	4.21425	2	2	4.21425	3	0	4.21425	3	4	4.21425	2	3	4.21425	2	0
4.22647	3	4	4.22647	0	2	4.22647	0	2	4.22647	4	1	4.22647	3	0	4.22647	2	2	4.22647	0	1	4.22647	2	2	4.22647	1	2	4.22647	3	2	4.22647	1	4	4.22647	3	1
4.23868	1	2	4.23868	2	2	4.23868	2	3	4.23868	1	4	4.23868	0	1	4.23868	5	3	4.23868	1	5	4.23868	1	4	4.23868	3	0	4.23868	1	1	4.23868	5	1	4.23868	2	3
4.2509	0	1	4.2509	5	2	4.2509	1	3	4.2509	3	3	4.2509	1	3	4.2509	3	1	4.2509	3	2	4.2509	0	1	4.2509	3	4	4.2509	4	0	4.2509	1	2	4.2509	3	0
4.26311	2	2	4.26311	3	0	4.26311	3	1	4.26311	1	0	4.26311	0	3	4.26311	3	0	4.26311	5	1	4.26311	0	0	4.26311	0	2	4.26311	6	2	4.26311	4	2	4.26311	3	1
4.27533	0	2	4.27533	3	3	4.27533	0	1	4.27533	1	2	4.27533	1	0	4.27533	2	1	4.27533	0	2	4.27533	3	1	4.27533	6	0	4.27533	1	2	4.27533	0	3	4.27533	3	3
4.28754	4	2	4.28754	2	2	4.28754	1	1	4.28754	2	1	4.28754	3	1	4.28754	4	0	4.28754	0	2	4.28754	2	3	4.28754	6	2	4.28754	1	0	4.28754	0	1	4.28754	3	0
4.29976	0	2	4.29976	2	1	4.29976	6	1	4.29976	2	2	4.29976	1	1	4.29976	1	0	4.29976	3	4	4.29976	1	2	4.29976	0	2	4.29976	1	4	4.29976	3	1	4.29976	3	0
4.31198	3	3	4.31198	2	1	4.31198	2	2	4.31198	3	1	4.31198	2	2	4.31198	1	2	4.31198	3	2	4.31198	1	5	4.31198	3	1	4.31198	5	4	4.31198	2	1	4.31198	0	3
4.32419	6	4	4.32419	3	2	4.32419	2	3	4.32419	2	1	4.32419	3	1	4.32419	5	2	4.32419	5	1	4.32419	3	2	4.32419	4	2	4.32419	3	3	4.32419	3	0	4.32419	3	1
4.33641	1	3	4.33641	3	2	4.33641	0	1	4.33641	0	3	4.33641	1	2	4.33641	2	1	4.33641	0	4	4.33641	1	2	4.33641	1	0	4.33641	4	1	4.33641	1	1	4.33641	2	4
4.34862	5	1	4.34862	2	2	4.34862	3	1	4.34862	2	1	4.34862	5	3	4.34862	0	0	4.34862	2	1	4.34862	2	1	4.34862	4	1	4.34862	2	2	4.34862	1	2	4.34862	4	1
4.36084	3	3	4.36084	4	2	4.36084	1	5	4.36084	3	2	4.36084	3	3	4.36084	1	2	4.36084	0	1	4.36084	2	3	4.36084	1	2	4.36084	2	0	4.36084	0	2	4.36084	1	1
4.37305	2	4	4.37305	3	2	4.37305	0	0	4.37305	4	1	4.37305	2	3	4.37305	2	1	4.37305	0	1	4.37305	1	4	4.37305	0	1	4.37305	3	2	4.37305	2	1	4.37305	1	2
4.38527	1	2	4.38527	2	0	4.38527	1	1	4.38527	5	1	4.38527	5	1	4.38527	6	1	4.38527	2	1	4.38527	2	1	4.38527	2	3	4.38527	5	2	4.38527	3	3	4.38527	2	0
4.39748	0	2	4.39748	3	2	4.39748	3	0	4.39748	3	0	4.39748	2	1	4.39748	2	1	4.39748	1	2	4.39748	2	3	4.39748	4	1	4.39748	2	2	4.39748	3	0	4.39748	3	1
4.4097	1	1	4.4097	2	2	4.4097	1	1	4.4097	5	0	4.4097	1	1	4.4097	2	2	4.4097	1	2	4.4097	3	2	4.4097	2	4	4.4097	1	0	4.4097	1	3	4.4097	0	0
4.42191	0	2	4.42191	3	4	4.42191	2	1	4.42191	1	0	4.42191	1	0	4.42191	2	3	4.42191	2	1	4.42191	1	2	4.42191	1	2	4.42191	3	4	4.42191	1	1	4.42191	3	3
4.43413	0	0	4.43413	0	2	4.43413	4	2	4.43413	2	3	4.43413	1	1	4.43413	3	2	4.43413	3	2	4.43413	0	2	4.43413	0	3	4.43413	2	0	4.43413	3	2	4.43413	1	0
4.44634	2	0	4.44634	6	3	4.44634	2	2	4.44634	3	0	4.44634	1	1	4.44634	2	1	4.44634	5	1	4.44634	0	1	4.44634	1	2	4.44634	5	1	4.44634	1	2	4.44634	2	2
4.45856	2	2	4.45856	2	1	4.45856	3	1	4.45856	2	1	4.45856	3	2	4.45856	4	4	4.45856	6	2	4.45856	1	0	4.45856	0	1	4.45856	1	1	4.45856	2	4	4.45856	1	4
4.47077	3	1	4.47077	2	1	4.47077	3	2	4.47077	1	2	4.47077	2	2	4.47077	1	1	4.47077	0	2	4.47077	2	2	4.47077	2	2	4.47077	1	2	4.47077	1	2	4.47077	4	1
4.48299	2	2	4.48299	2	1	4.48299	2	1	4.48299	2	1	4.48299	2	2	4.48299	0	0	4.48299	4	3	4.48299	3	2	4.48299	3	0	4.48299	5	2	4.48299	2	2	4.48299	0	0
4.4952	2	2	4.4952	2	3	4.4952	4	4	4.4952	3	0	4.4952	1	4	4.4952	0	1	4.4952	1	3	4.4952	2	1	4.4952	5	3	4.4952	3	0	4.4952	1	2	4.4952	3	3
4.50742	3	5	4.50742	1	1	4.50742	2	4	4.50742	4	2	4.50742	1	1	4.50742	2	0	4.50742	5	1	4.50742	4	1	4.50742	2	0	4.50742	3	3	4.50742	3	2	4.50742	4	1
4.51963	2	1	4.51963	1	1	4.51963	2	1	4.51963	5	2	4.51963	0	0	4.51963	2	2	4.51963	2	3	4.51963	3	1	4.51963	1	1	4.51963	2	5	4.51963	2	1	4.51963	2	1
4.53185	2	2	4.53185	1	1	4.53185	2	1	4.53185	3	3	4.53185	1	1	4.53185	1	0	4.53185	2	1	4.53185	4	1	4.53185	2	2	4.53185	2	3	4.53185	3	2	4.53185	4	4
4.54406	2	3	4.54406	2	5	4.54406	2	1	4.54406	3	3	4.54406	5	4	4.54406	1	2	4.54406	1	2	4.54406	1	1	4.54406	3	0	4.54406	1	1	4.54406	0	0	4.54406	4	3
4.55628	0	0	4.55628	5	2	4.55628	3	6	4.55628	1	1	4.55628	1	0	4.55628	2	5	4.55628	2	3	4.55628	3	1	4.55628	2	0	4.55628	3	3	4.55628	1	1	4.55628	1	0
4.5685	2	1	4.5685	0	3	4.5685	2	2	4.5685	2	2	4.5685	0	6	4.5685	5	2	4.5685	3	2	4.5685	0	0	4.5685	3	3	4.5685	2	5	4.5685	1	4	4.5685	2	3
4.58071	1	2	4.58071	1	2	4.58071	1	4	4.58071	2	1	4.58071	2	1	4.58071	1	1	4.58071	3	1	4.58071	0	3	4.58071	3	0	4.58071	4	2	4.58071	2	2	4.58071	0	2
4.59293	3	1	4.59293	5	5	4.59293	3	0	4.59293	0	2	4.59293	1	0	4.59293	2	1	4.59293	2	3	4.59293	1	5	4.59293	1	0	4.59293	3	0	4.59293	2	0	4.59293	3	0
4.60514	2	1	4.60514	1	2	4.60514	3	1	4.60514	1	1	4.60514	4	2	4.60514	1	0	4.60514	1	1	4.60514	2	1	4.60514	2	1	4.60514	2	2	4.60514	1	2	4.60514	2	0
4.61736	3	2	4.61736	1	1	4.61736	2	2	4.61736	1	2	4.61736	1	3	4.61736	4	2	4.61736	0	3	4.61736	3	1	4.61736	1	3	4.61736	4	1	4.61736	1	2	4.61736	2	3
4.62957	4	1	4.62957	1	6	4.62957	2	1	4.62957	2	3	4.62957	2	2	4.62957	1	3	4.62957	3	0	4.62957	2	1	4.62957	2	1	4.62957	2	1	4.62957	6	3	4.62957	2	1
4.64179	3	0	4.64179	3	2	4.64179	2	0	4.64179	2	4	4.64179	5	1	4.64179	2	0	4.64179	1	0	4.64179	7	1	4.64179	3	2	4.64179	4	2	4.64179	0	2	4.64179	3	0
4.654	4	1	4.654	2	1	4.654	2	2	4.654	1	3	4.654	2	2	4.654	1	4	4.654	4	2	4.654	0	1	4.654	1	4	4.654	0	4	4.654	2	3	4.654	2	3
4.66622	1	3	4.66622	1	3	4.66622	0	0	4.66622	0	4	4.66622	4	1	4.66622	2	2	4.66622	6	1	4.66622	2	3	4.66622	2	3	4.66622	3	4	4.66622	4	3	4.66622	2	3
4.67843	5	2	4.67843	2	1	4.67843	1	0	4.67843	0	1	4.67843	2	4	4.67843	4	2	4.67843	7	1	4.67843	4	2	4.67843	4	5	4.67843	0	1	4.67843	0	2	4.67843	0	1
4.69065	2	3	4.69065	2	1	4.69065	1	2	4.69065	2	5	4.69065	2	0	4.69065	2	2	4.69065	1	0	4.69065	4	5	4.69065	2	2	4.69065	2	5	4.69065	6	2	4.69065	4	0
4.70286	1	0	4.70286	6	4	4.70286	1	2	4.70286	1	2	4.70286	3	0	4.70286	0	1	4.70286	1	3	4.70286	1	3	4.70286	0	1	4.70286	2	3	4.70286	4	2	4.70286	5	3
4.71508	1	3	4.71508	3	3	4.71508	0	5	4.71508	5	1	4.71508	2	1	4.71508	0	0	4.71508	3	3	4.71508	2	1	4.71508	2	7	4.71508	4	2	4.71508	2	3	4.71508	3	2
4.72729	2	1	4.72729	1	4	4.72729	3	1	4.72729	1	2	4.72729	1	2	4.72729	1	0	4.72729	1	1	4.72729	2	4	4.72729	2	3	4.72729	5	4	4.72729	2	4	4.72729	4	1
4.73951	0	0	4.73951	0	2	4.73951	3	1	4.73951	0	6	4.73951	2	4	4.73951	2	2	4.73951	5	1	4.73951	2	2	4.73951	2	2	4.73951	3	3	4.73951	1	4	4.73951	2	0
4.75172	3	0	4.75172	4	1	4.75172	0	2	4.75172	3	3	4.75172	7	4	4.75172	2	1	4.75172	1	2	4.75172	3	3	4.75172	3	3	4.75172	2	4	4.75172	2	3	4.75172	4	1
4.76394	1	2	4.76394	2	1	4.76394	0	8	4.76394	2	4	4.76394	4	2	4.76394	2	4	4.76394	3	1	4.76394	1	2	4.76394	3	5	4.76394	2	1	4.76394	1	3	4.76394	3	2
4.77615	3	3	4.77615	5	4	4.77615	0	1	4.77615	0	2	4.77615	2	1	4.77615	5	3	4.77615	2	8	4.77615	3	5	4.77615	1	3	4.77615	1	6	4.77615	2	4	4.77615	4	2
4.78837	3	4	4.78837	2	3	4.78837	6	5	4.78837	2	5	4.78837	3	3	4.78837	1	4	4.78837	4	6	4.78837	2	3	4.78837	3	4	4.78837	1	3	4.78837	4	7	4.78837	1	6
4.80058	2	2	4.80058	2	6	4.80058	3	4	4.80058	2	9	4.80058	1	2	4.80058	1	4	4.80058	1	10	4.80058	3	4	4.80058	3	6	4.80058	1	4	4.80058	0	2	4.80058	2	3
4.8128	4	3	4.8128	1	4	4.8128	1	5	4.8128	1	4	4.8128	3	2	4.8128	3	4	4.8128	3	6	4.8128	4	1	4.8128	3	2	4.8128	6	2	4.8128	0	5	4.8128	3	4
4.82501	4	4	4.82501	2	3	4.82501	2	17	4.82501	1	7	4.82501	2	2	4.82501	3	3	4.82501	5	7	4.82501	3	2	4.82501	2	4	4.82501	3	9	4.82501	0	4	4.82501	3	4
4.83723	3	1	4.83723	4	3	4.83723	2	13	4.83723	4	11	4.83723	1	9	4.83723	5	6	4.83723	7	12	4.83723	4	7	4.83723	4	7	4.83723	4	6	4.83723	7	6	4.83723	5	8
4.84945	4	9	4.84945	7	17	4.84945	2	16	4.84945	5	25	4.84945	2	5	4.84945	6	2	4.84945	4	12	4.84945	3	5	4.84945	3	10	4.84945	3	4	4.84945	2	10	4.84945	3	1
4.86166	5	12	4.86166	9	10	4.86166	4	35	4.86166	2	19	4.86166	7	5	4.86166	4	8	4.86166	7	12	4.86166	3	13	4.86166	4	15	4.86166	1	13	4.86166	4	16	4.86166	7	13
4.87388	3	13	4.87388	6	20	4.87388	8	42	4.87388	7	37	4.87388	5	14	4.87388	8	7	4.87388	3	29	4.87388	9	16	4.87388	8	22	4.87388	8	18	4.87388	6	17	4.87388	7	20
4.88609	11	24	4.88609	11	36	4.88609	12	95	4.88609	12	40	4.88609	11	22	4.88609	6	12	4.88609	13	24	4.88609	8	30	4.88609	10	40	4.88609	16	33	4.88609	13	31	4.88609	8	20
4.89831	22	48	4.89831	18	60	4.89831	18	191	4.89831	22	86	4.89831	15	27	4.89831	12	33	4.89831	25	52	4.89831	15	27	4.89831	20	60	4.89831	25	58	4.89831	8	74	4.89831	22	58
4.91052	47	78	4.91052	31	125	4.91052	29	385	4.91052	37	166	4.91052	33	65	4.91052	36	55	4.91052	44	86	4.91052	30	74	4.91052	43	115	4.91052	41	91	4.91052	53	102	4.91052	42	79
4.92274	81	162	4.92274	63	233	4.92274	63	777	4.92274	61	287	4.92274	77	106	4.92274	68	102	4.92274	76	150	4.92274	75	144	4.92274	85	207	4.92274	90	189	4.92274	66	213	4.92274	73	176
4.93495	141	318	4.93495	130	439	4.93495	105	1356	4.93495	121	539	4.93495	118	206	4.93495	131	207	4.93495	136	290	4.93495	122	273	4.93495	128	410	4.93495	121	311	4.93495	114	423	4.93495	98	308
4.94717	211	583	4.94717	172	753	4.94717	172	2553	4.94717	156	898	4.94717	164	344	4.94717	180	365	4.94717	205	511	4.94717	190	492	4.94717	225	707	4.94717	192	589	4.94717	192	672	4.94717	192	557
4.95938	309	940	4.95938	273	1299	4.95938	282	4134	4.95938	266	1475	4.95938	261	569	4.95938	268	605	4.95938	311	822	4.95938	258	783	4.95938	336	1138	4.95938	303	930	4.95938	276	1162	4.95938	273	899
4.9716	400	1416	4.9716	442	1911	4.9716	398	6095	4.9716	379	2218	4.9716	391	987	4.9716	385	804	4.9716	441	1184	4.9716	380	1248	4.9716	463	1747	4.9716	429	1393	4.9716	393	1780	4.9716	365	1372
4.98381	567	2065	4.98381	549	2616	4.98381	511	8359	4.98381	512	3167	4.98381	476	1278	4.98381	520	1238	4.98381	564	1716	4.98381	528	1613	4.98381	640	2319	4.98381	629	2038	4.98381	501	2428	4.98381	499	1991
4.99603	786	2660	4.99603	743	3388	4.99603	652	10596	4.99603	724	4208	4.99603	724	1629	4.99603	694	1601	4.99603	785	2150	4.99603	712	2229	4.99603	852	2885	4.99603	822	2546	4.99603	674	3277	4.99603	698	2456
5.00824	1015	3285	5.00824	952	4049	5.00824	915	12994	5.00824	855	5183	5.00824	870	2087	5.00824	827	1945	5.00824	910	2691	5.00824	912	2706	5.00824	1075	3666	5.00824	1055	3243	5.00824	839	3901	5.00824	853	3062
5.02046	1239	3761	5.02046	1284	4694	5.02046	1056	14929	5.02046	1034	6067	5.02046	1009	2416	5.02046	996	2358	5.02046	1083	3063	5.02046	1116	2998	5.02046	1301	4399	5.02046	1302	3685	5.02046	1005	4445	5.02046	1084	3664
5.03267	1453	4247	5.03267	1426	5305	5.03267	1195	16705	5.03267	1208	6873	5.03267	1240	2787	5.03267	1263	2679	5.03267	1403	3402	5.03267	1289	3447	5.03267	1592	4794	5.03267	1475	4215	5.03267	1235	5039	5.03267	1326	3939
5.04489	1650	4688	5.04489	1573	5630	5.04489	1456	17751	5.04489	1431	7512	5.04489	1376	2954	5.04489	1365	2906	5.04489	1578	3672	5.04489	1551	3644	5.04489	1868	5214	5.04489	1785	4581	5.04489	1454	5306	5.04489	1382	4451
5.0571	1944	4817	5.0571	1781	5961	5.0571	1683	18513	5.0571	1667	8012	5.0571	1641	3192	5.0571	1517	3041	5.0571	1841	3968	5.0571	1694	3970	5.0571	2032	5624	5.0571	2013	4787	5.0571	1666	5745	5.0571	1559	4581
5.06932	2205	5122	5.06932	2111	6140	5.06932	1947	18701	5.06932	1874	8323	5.06932	1781	3370	5.06932	1754	3006	5.06932	1985	4044	5.06932	2021	4117	5.06932	2381	5688	5.06932	2198	4947	5.06932	1788	6142	5.06932	1818	4750
5.08153	2406	5094	5.08153	2349	6096	5.08153	1945	18864	5.08153	2078	8497	5.08153	1987	3335	5.08153	1961	3138	5.08153	2285	4217	5.08153	2229	4174	5.08153	2663	5944	5.08153	2571	5045	5.08153	2006	6015	5.08153	2004	4764
5.09375	2709	5147	5.09375	2595	6071	5.09375	2188	18930	5.09375	2278	8623	5.09375	2118	3297	5.09375	2067	3159	5.09375	2457	4140	5.09375	2371	4119	5.09375	2952	5839	5.09375	2791	5015	5.09375	2135	6040	5.09375	2161	4826
5.10597	2888	5119	5.10597	2808	6249	5.10597	2540	18611	5.10597	2460	8799	5.10597	2358	3325	5.10597	2273	3226	5.10597	2688	4164	5.10597	2632	4065	5.10597	3106	5740	5.10597	3014	4921	5.10597	2373	5961	5.10597	2307	4842
5.11818	3048	5080	5.11818	2948	5912	5.11818	2630	17923	5.11818	2534	8875	5.11818	2460	3288	5.11818	2485	3112	5.11818	2858	4070	5.11818	2684	4011	5.11818	3383	5830	5.11818	3319	4859	5.11818	2557	5813	5.11818	2450	4587
5.1304	3178	4931	5.1304	3128	5819	5.1304	2734	17179	5.1304	2802	8667	5.1304	2645	3052	5.1304	2632	3006	5.1304	2978	4025	5.1304	2962	3888	5.1304	3592	5701	5.1304	3469	4828	5.1304	2699	5616	5.1304	2629	4585
5.14261	3416	4704	5.14261	3360	5655	5.14261	2957	16351	5.14261	3075	8442	5.14261	2842	3238	5.14261	2794	2884	5.14261	3189	3853	5.14261	3175	3902	5.14261	3721	5343	5.14261	3688	4593	5.14261	2848	5417	5.14261	2806	4408
5.15483	3652	4499	5.15483	3449	5492	5.15483	3089	15871	5.15483	3139	8034	5.15483	2976	2987	5.15483	2931	2830	5.15483	3313	3826	5.15483	3258	3692	5.15483	3793	5167	5.15483	3761	4401	5.15483	2941	5261	5.15483	2935	4183
5.16704	3740	4391	5.16704	3639	5187	5.16704	3264	15016	5.16704	3221	7931	5.16704	2974	2858	5.16704	2966	2731	5.16704	3361	3624	5.16704	3421	3501	5.16704	4035	4911	5.16704	3971	4227	5.16704	3045	5033	5.16704	3150	3973
5.17926	3775	4121	5.17926	3857	4856	5.17926	3305	14268	5.17926	3386	7545	5.17926	3045	2696	5.17926	3173	2721	5.17926	3598	3480	5.17926	3613	3279	5.17926	4161	4798	5.17926	4052	4001	5.17926	3262	4670	5.17926	3200	3786
5.19147	4120	3804	5.19147	4040	4519	5.19147	3435	13367	5.19147	3436	7441	5.19147	3222	2633	5.19147	3282	2482	5.19147	3826	3180	5.19147	3703	3202	5.19147	4346	4540	5.19147	4204	3781	5.19147	3257	4369	5.19147	3264	3699
5.20369	4106	3655	5.20369	4075	4375	5.20369	3563	12591	5.20369	3608	6835	5.20369	3408	2335	5.20369	3266	2266	5.20369	3955	3140	5.20369	3791	2933	5.20369	4516	4213	5.20369	4330	3631	5.20369	3432	4277	5.20369	3376	3431
5.2159	4257	3448	5.2159	4094	4117	5.2159	3524	11641	5.2159	3690	6465	5.2159	3437	2317	5.2159	3557	2278	5.2159	4035	2948	5.2159	3800	2822	5.2159	4457	3944	5.2159	4436	3475	5.2159	3487	3939	5.2159	3460	3175
5.22812	4209	3243	5.22812	4216	3963	5.22812	3726	11066	5.22812	3697	6254	5.22812	3518	2130	5.22812	3548	2056	5.22812	3993	2738	5.22812	3983	2532	5.22812	4626	3705	5.22812	4606	3158	5.22812	3560	3729	5.22812	3558	2897
5.24033	4461	3078	5.24033	4421	3704	5.24033	3814	10407	5.24033	3788	5780	5.24033	3555	2085	5.24033	3668	1955	5.24033	4078	2509	5.24033	4146	2424	5.24033	4731	3548	5.24033	4638	3009	5.24033	3674	3512	5.24033	3686	2906
5.25255	4461	2889	5.25255	4426	3459	5.25255	3909	9526	5.25255	3902	5672	5.25255	3784	1969	5.25255	3659	1821	5.25255	4134	2508	5.25255	4206	2257	5.25255	4856	3306	5.25255	4835	2866	5.25255	3725	3373	5.25255	3700	2752
5.26476	4447	2735	5.26476	4498	3158	5.26476	3845	8935	5.26476	3922	5303	5.26476	3684	1759	5.26476	3754	1770	5.26476	4298	2264	5.26476	4372	2129	5.26476	4949	3160	5.26476	4950	2736	5.26476	3669	3040	5.26476	3769	2480
5.27698	4633	2607	5.27698	4528	3037	5.27698	3994	8381	5.27698	4055	4983	5.27698	3721	1657	5.27698	3768	1697	5.27698	4358	2202	5.27698	4397	2033	5.27698	5083	2864	5.27698	4972	2601	5.27698	3840	2764	5.27698	3736	2389
5.28919	4603	2462	5.28919	4730	2804	5.28919	4148	8013	5.28919	4045	4821	5.28919	3866	1589	5.28919	3849	1515	5.28919	4429	2081	5.28919	4302	1945	5.28919	5179	2821	5.28919	4890	2341	5.28919	3954	2611	5.28919	3894	2181
5.30141	4772	2246	5.30141	4762	2752	5.30141	4211	7343	5.30141	4123	4568	5.30141	3887	1446	5.30141	4062	1463	5.30141	4473	1909	5.30141	4492	1837	5.30141	5166	2576	5.30141	5182	2315	5.30141	4057	2457	5.30141	3952	2104
5.31362	4849	2103	5.31362	4726	2493	5.31362	4289	6791	5.31362	4223	4459	5.31362	3925	1454	5.31362	3963	1377	5.31362	4519	1780	5.31362	4526	1694	5.31362	5271	2464	5.31362	5186	2162	5.31362	4107	2327	5.31362	4050	1842
5.32584	4979	1998	5.32584	4920	2299	5.32584	4249	6387	5.32584	4335	4104	5.32584	4072	1313	5.32584	4220	1206	5.32584	4801	1734	5.32584	4580	1584	5.32584	5355	2239	5.32584	5239	1972	5.32584	4062	2185	5.32584	4032	1797
5.33805	5149	1830	5.33805	4917	2226	5.33805	4386	5964	5.33805	4403	3742	5.33805	4076	1264	5.33805	4076	1162	5.33805	4669	1573	5.33805	4710	1464	5.33805	5480	2231	5.33805	5261	1846	5.33805	4138	2107	5.33805	4012	1730
5.35027	4971	1674	5.35027	5079	2047	5.35027	4350	5471	5.35027	4380	3506	5.35027	4215	1124	5.35027	4196	1076	5.35027	4848	1499	5.35027	4692	1349	5.35027	5428	1993	5.35027	5395	1691	5.35027	4159	1924	5.35027	4037	1512
5.36249	5201	1672	5.36249	5120	1916	5.36249	4446	5300	5.36249	4482	3241	5.36249	4189	1075	5.36249	4252	1039	5.36249	4726	1436	5.36249	4798	1260	5.36249	5485	1931	5.36249	5374	1625	5.36249	4129	1802	5.36249	4256	1501
5.3747	5312	1524	5.3747	5080	1784	5.3747	4453	4810	5.3747	4461	3158	5.3747	4311	1015	5.3747	4231	998	5.3747	4977	1323	5.3747	4750	1194	5.3747	5531	1696	5.3747	5435	1493	5.3747	4266	1716	5.3747	4218	1330
5.38692	5195	1398	5.38692	5268	1547	5.38692	4580	4402	5.38692	4484	2916	5.38692	4265	918	5.38692	4339	956	5.38692	4923	1178	5.38692	5017	1091	5.38692	5573	1644	5.38692	5521	1436	5.38692	4230	1599	5.38692	4224	1227
5.39913	5284	1305	5.39913	5295	1512	5.39913	4672	4031	5.39913	4519	2661	5.39913	4249	923	5.39913	4393	824	5.39913	4938	1115	5.39913	5005	1086	5.39913	5686	1475	5.39913	5559	1321	5.39913	4308	1447	5.39913	4254	1156
5.41135	5302	1154	5.41135	5307	1420	5.41135	4582	3795	5.41135	4532	2427	5.41135	4296	822	5.41135	4276	807	5.41135	5004	996	5.41135	5012	966	5.41135	5684	1389	5.41135	5498	1193	5.41135	4370	1301	5.41135	4264	1065
5.42356	5395	1115	5.42356	5284	1352	5.42356	4621	3508	5.42356	4489	2278	5.42356	4306	759	5.42356	4392	720	5.42356	5145	1070	5.42356	5028	875	5.42356	5711	1285	5.42356	5605	1102	5.42356	4332	1228	5.42356	4284	973
5.43578	5319	1017	5.43578	5400	1189	5.43578	4707	3156	5.43578	4652	2154	5.43578	4336	691	5.43578	4466	664	5.43578	5031	899	5.43578	5111	842	5.43578	5739	1177	5.43578	5722	1032	5.43578	4470	1236	5.43578	4219	940
5.44799	5341	932	5.44799	5264	1168	5.44799	4747	2943	5.44799	4690	2003	5.44799	4454	657	5.44799	4427	632	5.44799	5107	905	5.44799	4985	781	5.44799	5784	1086	5.44799	5707	1016	5.44799	4399	1075	5.44799	4388	836
5.46021	5457	905	5.46021	5324	1020	5.46021	4670	2698	5.46021	4648	1784	5.46021	4423	588	5.46021	4337	600	5.46021	5075	788	5.46021	5036	685	5.46021	5641	1037	5.46021	5741	852	5.46021	4358	922	5.46021	4323	838
5.47242	5254	793	5.47242	5526	958	5.47242	4656	2439	5.47242	4710	1635	5.47242	4467	573	5.47242	4315	566	5.47242	4998	733	5.47242	4993	620	5.47242	5715	931	5.47242	5801	837	5.47242	4451	834	5.47242	4278	745
5.48464	5406	741	5.48464	5245	880	5.48464	4603	2260	5.48464	4502	1410	5.48464	4385	522	5.48464	4387	481	5.48464	5191	619	5.48464	4957	557	5.48464	5723	913	5.48464	5665	757	5.48464	4220	846	5.48464	4280	643
5.49685	5309	667	5.49685	5344	782	5.49685	4696	2062	5.49685	4688	1363	5.49685	4330	463	5.49685	4389	399	5.49685	5069	601	5.49685	5185	581	5.49685	5738	809	5.49685	5633	657	5.49685	4354	730	5.49685	4340	613
5.50907	5254	706	5.50907	5266	738	5.50907	4746	1908	5.50907	4591	1256	5.50907	4401	413	5.50907	4321	409	5.50907	4916	545	5.50907	5041	492	5.50907	5747	739	5.50907	5554	666	5.50907	4370	713	5.50907	4303	559
5.52128	5346	592	5.52128	5153	700	5.52128	4583	1757	5.52128	4571	1152	5.52128	4379	432	5.52128	4339	384	5.52128	5001	497	5.52128	4967	414	5.52128	5613	739	5.52128	5566	634	5.52128	4244	641	5.52128	4250	531
5.5335	5272	546	5.5335	5158	684	5.5335	4512	1587	5.5335	4631	1090	5.5335	4184	369	5.5335	4277	342	5.5335	4911	487	5.5335	4978	393	5.5335	5654	585	5.5335	5589	591	5.5335	4255	556	5.5335	4115	466
5.54571	5229	510	5.54571	5177	594	5.54571	4577	1520	5.54571	4447	988	5.54571	4334	324	5.54571	4276	327	5.54571	4966	465	5.54571	4996	403	5.54571	5543	623	5.54571	5482	531	5.54571	4215	557	5.54571	4237	437
5.55793	5274	398	5.55793	5202	576	5.55793	4527	1363	5.55793	4454	940	5.55793	4279	276	5.55793	4090	302	5.55793	4746	409	5.55793	4925	344	5.55793	5589	561	5.55793	5352	471	5.55793	4225	522	5.55793	4145	399
5.57014	5177	432	5.57014	5250	530	5.57014	4451	1240	5.57014	4505	816	5.57014	4240	307	5.57014	4175	310	5.57014	4826	388	5.57014	4886	310	5.57014	5650	545	5.57014	5507	445	5.57014	4180	485	5.57014	4177	412
5.58236	5269	377	5.58236	5129	489	5.58236	4552	1116	5.58236	4426	685	5.58236	4256	286	5.58236	4170	233	5.58236	4840	334	5.58236	4792	336	5.58236	5602	502	5.58236	5413	421	5.58236	4128	439	5.58236	4143	337
5.59457	5114	394	5.59457	5205	489	5.59457	4356	1037	5.59457	4538	744	5.59457	4343	264	5.59457	4266	264	5.59457	4664	332	5.59457	4877	283	5.59457	5428	466	5.59457	5476	392	5.59457	4197	419	5.59457	4170	331
5.60679	5241	321	5.60679	5149	454	5.60679	4524	935	5.60679	4349	693	5.60679	4131	223	5.60679	4135	237	5.60679	4786	324	5.60679	4954	278	5.60679	5454	440	5.60679	5407	364	5.60679	4216	384	5.60679	4006	311
5.619	5263	335	5.619	5138	407	5.619	4540	882	5.619	4576	613	5.619	4147	228	5.619	4337	216	5.619	4832	270	5.619	4992	251	5.619	5468	445	5.619	5393	374	5.619	4112	310	5.619	4133	284
5.63122	5142	294	5.63122	5117	413	5.63122	4435	844	5.63122	4532	558	5.63122	4186	195	5.63122	4227	216	5.63122	4973	273	5.63122	4847	221	5.63122	5440	401	5.63122	5393	336	5.63122	4226	319	5.63122	4060	287
5.64344	5269	277	5.64344	5022	340	5.64344	4413	728	5.64344	4434	522	5.64344	4247	196	5.64344	4290	178	5.64344	4835	245	5.64344	4784	212	5.64344	5439	366	5.64344	5442	356	5.64344	4150	300	5.64344	4047	288
5.65565	5213	274	5.65565	5198	335	5.65565	4565	725	5.65565	4558	514	5.65565	4214	171	5.65565	4217	169	5.65565	4730	236	5.65565	4914	218	5.65565	5636	354	5.65565	5437	280	5.65565	4118	266	5.65565	4149	251
5.66787	5135	273	5.66787	5179	327	5.66787	4599	680	5.66787	4602	453	5.66787	4277	173	5.66787	4199	169	5.66787	5007	222	5.66787	5013	199	5.66787	5562	336	5.66787	5463	315	5.66787	4240	270	5.66787	4073	215
5.68008	5158	233	5.68008	5258	360	5.68008	4395	673	5.68008	4400	410	5.68008	4286	156	5.68008	4280	167	5.68008	4888	227	5.68008	4847	172	5.68008	5647	347	5.68008	5495	281	5.68008	4263	268	5.68008	4205	219
5.6923	5229	202	5.6923	5215	294	5.6923	4541	565	5.6923	4422	392	5.6923	4242	161	5.6923	4353	148	5.6923	4975	200	5.6923	4930	175	5.6923	5536	339	5.6923	5461	252	5.6923	4228	236	5.6923	4125	211
5.70451	5301	206	5.70451	5191	315	5.70451	4595	546	5.70451	4445	365	5.70451	4267	156	5.70451	4257	137	5.70451	5010	179	5.70451	4884	133	5.70451	5533	275	5.70451	5346	242	5.70451	4187	261	5.70451	4227	175
5.71673	5364	184	5.71673	5253	282	5.71673	4513	475	5.71673	4524	339	5.71673	4255	113	5.71673	4267	127	5.71673	4837	166	5.71673	5029	166	5.71673	5475	229	5.71673	5456	225	5.71673	4317	198	5.71673	4138	196
5.72894	5184	213	5.72894	5254	290	5.72894	4554	475	5.72894	4554	356	5.72894	4248	122	5.72894	4184	128	5.72894	4903	166	5.72894	4968	155	5.72894	5540	268	5.72894	5500	230	5.72894	4190	229	5.72894	4168	178
5.74116	5186	184	5.74116	5134	249	5.74116	4526	429	5.74116	4498	298	5.74116	4262	116	5.74116	4409	133	5.74116	4866	145	5.74116	4983	141	5.74116	5606	252	5.74116	5322	202	5.74116	4270	175	5.74116	4308	166
5.75337	5273	175	5.75337	5136	206	5.75337	4514	384	5.75337	4558	270	5.75337	4128	95	5.75337	4340	113	5.75337	4935	126	5.75337	4892	120	5.75337	5549	225	5.75337	5440	188	5.75337	4198	176	5.75337	4253	156
5.76559	5205	159	5.76559	5123	228	5.76559	4509	352	5.76559	4468	262	5.76559	4262	110	5.76559	4353	83	5.76559	4916	147	5.76559	4841	136	5.76559	5507	211	5.76559	5382	188	5.76559	4170	149	5.76559	4134	132
5.7778	5159	141	5.7778	5071	222	5.7778	4417	337	5.7778	4370	236	5.7778	4223	97	5.7778	4184	76	5.7778	4781	115	5.7778	4875	99	5.7778	5510	189	5.7778	5278	154	5.7778	4020	149	5.7778	4025	146
5.79002	4971	146	5.79002	4983	209	5.79002	4411	309	5.79002	4321	236	5.79002	4163	82	5.79002	4153	87	5.79002	4720	125	5.79002	4822	118	5.79002	5427	180	5.79002	5239	166	5.79002	4055	138	5.79002	4134	152
5.80223	5023	113	5.80223	4972	179	5.80223	4303	251	5.80223	4312	205	5.80223	4134	67	5.80223	4191	72	5.80223	4682	117	5.80223	4792	100	5.80223	5396	166	5.80223	5154	170	5.80223	4045	139	5.80223	4012	118
5.81445	4876	125	5.81445	5043	187	5.81445	4362	245	5.81445	4297	162	5.81445	4041	81	5.81445	4158	55	5.81445	4741	96	5.81445	4732	85	5.81445	5472	161	5.81445	5135	133	5.81445	3926	124	5.81445	3868	105
5.82666	4869	109	5.82666	4996	160	5.82666	4337	243	5.82666	4114	178	5.82666	3979	70	5.82666	4010	55	5.82666	4611	96	5.82666	4637	59	5.82666	5220	152	5.82666	5145	126	5.82666	4036	101	5.82666	3922	102
5.83888	4942	101	5.83888	4815	148	5.83888	4237	201	5.83888	4263	151	5.83888	4040	85	5.83888	3966	69	5.83888	4559	83	5.83888	4519	81	5.83888	5209	150	5.83888	5139	119	5.83888	4003	106	5.83888	3928	93
5.85109	4826	109	5.85109	4775	153	5.85109	4207	217	5.85109	4185	127	5.85109	3860	52	5.85109	3854	78	5.85109	4724	86	5.85109	4571	60	5.85109	5259	121	5.85109	4992	118	5.85109	3856	109	5.85109	3818	90
5.86331	4669	76	5.86331	4785	127	5.86331	4053	178	5.86331	4114	139	5.86331	3972	53	5.86331	3847	60	5.86331	4583	80	5.86331	4536	57	5.86331	5087	124	5.86331	4989	121	5.86331	3700	94	5.86331	3767	82
5.87552	4697	65	5.87552	4784	111	5.87552	4121	192	5.87552	4166	148	5.87552	3850	55	5.87552	3967	45	5.87552	4384	74	5.87552	4326	80	5.87552	4962	111	5.87552	4982	94	5.87552	3705	89	5.87552	3688	92
5.88774	4778	75	5.88774	4637	116	5.88774	4194	157	5.88774	4086	142	5.88774	3815	61	5.88774	3868	39	5.88774	4449	63	5.88774	4476	66	5.88774	4927	99	5.88774	4939	120	5.88774	3863	77	5.88774	3596	66
5.89996	4725	78	5.89996	4657	103	5.89996	4153	164	5.89996	3968	130	5.89996	3739	50	5.89996	3737	61	5.89996	4382	73	5.89996	4442	61	5.89996	4993	106	5.89996	4907	93	5.89996	3746	95	5.89996	3659	64
5.91217	4699	72	5.91217	4721	89	5.91217	4007	130	5.91217	3955	115	5.91217	3853	41	5.91217	3849	45	5.91217	4362	58	5.91217	4518	64	5.91217	5028	100	5.91217	4845	79	5.91217	3800	68	5.91217	3756	57
5.92439	4592	65	5.92439	4617	77	5.92439	4083	149	5.92439	4070	96	5.92439	3781	36	5.92439	3803	41	5.92439	4372	56	5.92439	4555	42	5.92439	4936	88	5.92439	4876	63	5.92439	3766	59	5.92439	3675	55
5.9366	4711	78	5.9366	4593	82	5.9366	4051	126	5.9366	4087	117	5.9366	3908	33	5.9366	3930	43	5.9366	4436	58	5.9366	4594	46	5.9366	5004	75	5.9366	4765	70	5.9366	3675	77	5.9366	3727	57
5.94882	4699	41	5.94882	4633	84	5.94882	4227	119	5.94882	4036	85	5.94882	3906	42	5.94882	3952	44	5.94882	4398	65	5.94882	4524	48	5.94882	4991	90	5.94882	4981	56	5.94882	3823	60	5.94882	3675	51
5.96103	4677	76	5.96103	4544	86	5.96103	4221	133	5.96103	4106	92	5.96103	3988	43	5.96103	3853	33	5.96103	4522	52	5.96103	4470	51	5.96103	5069	90	5.96103	4959	61	5.96103	3693	60	5.96103	3761	52
5.97325	4701	61	5.97325	4709	82	5.97325	4140	130	5.97325	4157	103	5.97325	3918	35	5.97325	3893	43	5.97325	4359	61	5.97325	4541	44	5.97325	5009	89	5.97325	4792	66	5.97325	3669	54	5.97325	3775	68
5.98546	4719	65	5.98546	4673	78	5.98546	4218	101	5.98546	4093	101	5.98546	3898	35	5.98546	3908	42	5.98546	4561	66	5.98546	4507	45	5.98546	4902	85	5.98546	4858	89	5.98546	3722	49	5.98546	3687	44
5.99768	4821	51	5.99768	4804	90	5.99768	4199	110	5.99768	4210	89	5.99768	3991	38	5.99768	3923	43	5.99768	4578	53	5.99768	4546	38	5.99768	5189	91	5.99768	5050	78	5.99768	3815	68	5.99768	3951	51
6.00989	4908	65	6.00989	4829	69	6.00989	4230	111	6.00989	4248	94	6.00989	3922	35	6.00989	4045	36	6.00989	4577	71	6.00989	4517	57	6.00989	5139	69	6.00989	5022	63	6.00989	3804	53	6.00989	3870	52
6.02211	4982	70	6.02211	4826	99	6.02211	4272	105	6.02211	4282	80	6.02211	4069	50	6.02211	4043	50	6.02211	4533	57	6.02211	4678	55	6.02211	5199	92	6.02211	5071	68	6.02211	3866	55	6.02211	3759	73
6.03432	4848	78	6.03432	4905	88	6.03432	4313	115	6.03432	4249	94	6.03432	4056	36	6.03432	4135	39	6.03432	4563	66	6.03432	4672	42	6.03432	5270	85	6.03432	5059	67	6.03432	3998	56	6.03432	3942	60
6.04654	5028	83	6.04654	4853	92	6.04654	4274	110	6.04654	4351	85	6.04654	4081	48	6.04654	4108	38	6.04654	4655	56	6.04654	4673	45	6.04654	5352	93	6.04654	5079	75	6.04654	3937	56	6.04654	3827	68
6.05875	4881	64	6.05875	4964	70	6.05875	4310	96	6.05875	4289	77	6.05875	3983	49	6.05875	4100	44	6.05875	4777	59	6.05875	4803	44	6.05875	5268	83	6.05875	5023	62	6.05875	3946	66	6.05875	3858	68
6.07097	4932	69	6.07097	4962	68	6.07097	4419	107	6.07097	4221	71	6.07097	4196	35	6.07097	3980	50	6.07097	4604	59	6.07097	4831	60	6.07097	5130	83	6.07097	5115	73	6.07097	3846	42	6.07097	3843	75
6.08318	4895	54	6.08318	4929	71	6.08318	4320	80	6.08318	4217	86	6.08318	3997	33	6.08318	4078	35	6.08318	4623	58	6.08318	4748	52	6.08318	5205	84	6.08318	5121	71	6.08318	3833	45	6.08318	3781	64
6.0954	4966	57	6.0954	4862	60	6.0954	4295	88	6.0954	4279	79	6.0954	4068	42	6.0954	4123	47	6.0954	4660	80	6.0954	4689	51	6.0954	5167	69	6.0954	5049	72	6.0954	3811	55	6.0954	3718	59
6.10761	4885	73	6.10761	4810	58	6.10761	4224	83	6.10761	4247	69	6.10761	3984	46	6.10761	3972	30	6.10761	4599	71	6.10761	4651	53	6.10761	5104	85	6.10761	5095	77	6.10761	3865	56	6.10761	3790	71
6.11983	4811	75	6.11983	4820	67	6.11983	4237	93	6.11983	4237	61	6.11983	4000	46	6.11983	3945	53	6.11983	4464	54	6.11983	4608	42	6.11983	5003	68	6.11983	4982	72	6.11983	3764	63	6.11983	3785	66
6.13204	4821	61	6.13204	4846	62	6.13204	4089	66	6.13204	4171	68	6.13204	3850	38	6.13204	3751	47	6.13204	4543	63	6.13204	4683	34	6.13204	5095	70	6.13204	4839	77	6.13204	3777	47	6.13204	3758	75
6.14426	4694	76	6.14426	4766	75	6.14426	4068	95	6.14426	3948	74	6.14426	3789	39	6.14426	3801	39	6.14426	4328	56	6.14426	4541	42	6.14426	4876	63	6.14426	4915	95	6.14426	3651	51	6.14426	3660	66
6.15647	4627	59	6.15647	4563	65	6.15647	4106	93	6.15647	4058	60	6.15647	3979	46	6.15647	3919	49	6.15647	4342	74	6.15647	4419	44	6.15647	4896	90	6.15647	4786	81	6.15647	3714	55	6.15647	3582	77
6.16869	4632	67	6.16869	4516	85	6.16869	3962	74	6.16869	3922	63	6.16869	3782	42	6.16869	3911	37	6.16869	4387	66	6.16869	4554	42	6.16869	4785	78	6.16869	4882	88	6.16869	3666	33	6.16869	3549	73
6.18091	4503	58	6.18091	4620	52	6.18091	4030	89	6.18091	3922	57	6.18091	3686	43	6.18091	3839	42	6.18091	4194	69	6.18091	4347	45	6.18091	4715	69	6.18091	4675	78	6.18091	3607	45	6.18091	3466	90
6.19312	4407	60	6.19312	4427	75	6.19312	4083	79	6.19312	3996	66	6.19312	3738	38	6.19312	3727	46	6.19312	4340	64	6.19312	4328	52	6.19312	4736	80	6.19312	4746	78	6.19312	3618	42	6.19312	3590	84
6.20534	4504	60	6.20534	4341	57	6.20534	3867	78	6.20534	3890	54	6.20534	3656	46	6.20534	3755	47	6.20534	4287	70	6.20534	4169	56	6.20534	4747	73	6.20534	4654	75	6.20534	3528	57	6.20534	3516	75
6.21755	4405	53	6.21755	4359	72	6.21755	3847	68	6.21755	3849	73	6.21755	3653	39	6.21755	3597	37	6.21755	4085	70	6.21755	4220	56	6.21755	4640	86	6.21755	4537	66	6.21755	3475	64	6.21755	3456	75
6.22977	4415	61	6.22977	4303	51	6.22977	3867	67	6.22977	3780	67	6.22977	3631	54	6.22977	3596	44	6.22977	4027	70	6.22977	4285	61	6.22977	4605	61	6.22977	4330	76	6.22977	3532	51	6.22977	3402	76
6.24198	4372	63	6.24198	4311	66	6.24198	3704	70	6.24198	3787	52	6.24198	3573	41	6.24198	3607	37	6.24198	4167	56	6.24198	4075	54	6.24198	4375	73	6.24198	4566	73	6.24198	3359	57	6.24198	3368	69
6.2542	4426	50	6.2542	4226	49	6.2542	3687	48	6.2542	3695	47	6.2542	3584	44	6.2542	3630	44	6.2542	4063	70	6.2542	4085	58	6.2542	4452	72	6.2542	4396	67	6.2542	3387	67	6.2542	3254	76
6.26641	4261	57	6.26641	4218	55	6.26641	3765	72	6.26641	3643	60	6.26641	3644	40	6.26641	3465	47	6.26641	4089	41	6.26641	4067	50	6.26641	4595	68	6.26641	4408	81	6.26641	3378	43	6.26641	3329	57
6.27863	4244	55	6.27863	4217	56	6.27863	3710	59	6.27863	3674	59	6.27863	3565	42	6.27863	3522	33	6.27863	4028	60	6.27863	4026	49	6.27863	4463	85	6.27863	4375	69	6.27863	3509	50	6.27863	3350	81
6.29084	4361	60	6.29084	4154	64	6.29084	3636	68	6.29084	3627	56	6.29084	3592	36	6.29084	3545	44	6.29084	4063	70	6.29084	4206	36	6.29084	4420	67	6.29084	4437	46	6.29084	3410	59	6.29084	3277	54
6.30306	4297	50	6.30306	4270	66	6.30306	3589	53	6.30306	3684	61	6.30306	3601	42	6.30306	3521	44	6.30306	4062	58	6.30306	4105	53	6.30306	4542	58	6.30306	4378	84	6.30306	3338	55	6.30306	3320	63
6.31527	4247	62	6.31527	4268	55	6.31527	3742	60	6.31527	3748	41	6.31527	3544	53	6.31527	3474	36	6.31527	4053	62	6.31527	4115	45	6.31527	4573	74	6.31527	4433	78	6.31527	3355	45	6.31527	3257	76
6.32749	4240	35	6.32749	4209	62	6.32749	3760	65	6.32749	3723	40	6.32749	3588	44	6.32749	3502	33	6.32749	4089	64	6.32749	4059	50	6.32749	4455	62	6.32749	4411	55	6.32749	3490	56	6.32749	3159	54
6.3397	4223	45	6.3397	4255	44	6.3397	3666	48	6.3397	3735	58	6.3397	3486	32	6.3397	3562	30	6.3397	3996	71	6.3397	4046	47	6.3397	4446	57	6.3397	4288	59	6.3397	3322	46	6.3397	3214	58
6.35192	4278	54	6.35192	4173	44	6.35192	3831	50	6.35192	3643	46	6.35192	3536	47	6.35192	3426	22	6.35192	4056	53	6.35192	3998	36	6.35192	4431	63	6.35192	4470	64	6.35192	3373	56	6.35192	3321	57
6.36413	4154	50	6.36413	4426	30	6.36413	3767	45	6.36413	3562	47	6.36413	3594	28	6.36413	3492	35	6.36413	3998	58	6.36413	4006	40	6.36413	4470	54	6.36413	4429	60	6.36413	3368	40	6.36413	3363	62
6.37635	4250	42	6.37635	4285	35	6.37635	3774	53	6.37635	3594	47	6.37635	3546	38	6.37635	3517	27	6.37635	4132	61	6.37635	4177	38	6.37635	4518	57	6.37635	4463	69	6.37635	3283	58	6.37635	3318	60
6.38856	4174	41	6.38856	4260	60	6.38856	3646	37	6.38856	3706	42	6.38856	3496	50	6.38856	3482	36	6.38856	4046	49	6.38856	4038	43	6.38856	4472	60	6.38856	4476	60	6.38856	3370	53	6.38856	3402	48
6.40078	4255	53	6.40078	4216	48	6.40078	3715	58	6.40078	3727	41	6.40078	3545	29	6.40078	3518	24	6.40078	4033	41	6.40078	4146	31	6.40078	4280	61	6.40078	4330	59	6.40078	3361	46	6.40078	3220	53
6.41299	4415	39	6.41299	4248	44	6.41299	3648	37	6.41299	3702	46	6.41299	3576	28	6.41299	3535	24	6.41299	4006	55	6.41299	4067	29	6.41299	4534	67	6.41299	4284	61	6.41299	3181	35	6.41299	3269	50
6.42521	4308	41	6.42521	4200	44	6.42521	3738	47	6.42521	3567	43	6.42521	3532	28	6.42521	3532	31	6.42521	3917	36	6.42521	4036	30	6.42521	4447	42	6.42521	4255	49	6.42521	3283	47	6.42521	3240	43
6.43743	4247	42	6.43743	4309	34	6.43743	3648	45	6.43743	3681	43	6.43743	3556	27	6.43743	3485	30	6.43743	4004	61	6.43743	3947	36	6.43743	4423	53	6.43743	4295	59	6.43743	3341	34	6.43743	3263	32
6.44964	4265	31	6.44964	4181	33	6.44964	3679	35	6.44964	3649	31	6.44964	3458	22	6.44964	3388	18	6.44964	4059	42	6.44964	3980	39	6.44964	4377	53	6.44964	4398	47	6.44964	3256	33	6.44964	3186	41
6.46186	4103	30	6.46186	4005	25	6.46186	3627	30	6.46186	3604	51	6.46186	3455	22	6.46186	3498	24	6.46186	3922	41	6.46186	3968	30	6.46186	4448	49	6.46186	4283	50	6.46186	3310	31	6.46186	3245	30
6.47407	4199	40	6.47407	4264	29	6.47407	3622	40	6.47407	3583	41	6.47407	3568	32	6.47407	3403	9	6.47407	3929	36	6.47407	4025	29	6.47407	4375	34	6.47407	4234	45	6.47407	3258	30	6.47407	3257	28
6.48629	4170	31	6.48629	4102	32	6.48629	3571	36	6.48629	3645	31	6.48629	3529	27	6.48629	3475	18	6.48629	4019	45	6.48629	3923	24	6.48629	4269	46	6.48629	4170	29	6.48629	3189	27	6.48629	3209	42
6.4985	4189	23	6.4985	4111	26	6.4985	3750	41	6.4985	3605	32	6.4985	3381	26	6.4985	3494	20	6.4985	4016	46	6.4985	3927	31	6.4985	4288	44	6.4985	4217	36	6.4985	3136	24	6.4985	3159	30
6.51072	4064	28	6.51072	3993	32	6.51072	3678	35	6.51072	3568	30	6.51072	3414	17	6.51072	3404	20	6.51072	4035	38	6.51072	3988	27	6.51072	4221	32	6.51072	4187	36	6.51072	3168	43	6.51072	3156	37
6.52293	4198	19	6.52293	4046	28	6.52293	3539	24	6.52293	3603	27	6.52293	3404	21	6.52293	3324	20	6.52293	3955	33	6.52293	3936	21	6.52293	4265	36	6.52293	4145	40	6.52293	3044	25	6.52293	3124	33
6.53515	4043	19	6.53515	4088	17	6.53515	3536	29	6.53515	3328	37	6.53515	3347	15	6.53515	3405	29	6.53515	3869	30	6.53515	3804	21	6.53515	4127	49	6.53515	4108	41	6.53515	3265	26	6.53515	3126	20
6.54736	4096	28	6.54736	4097	28	6.54736	3554	29	6.54736	3494	23	6.54736	3399	13	6.54736	3420	24	6.54736	3860	26	6.54736	3895	22	6.54736	4264	34	6.54736	4125	37	6.54736	3149	22	6.54736	3197	30
6.55958	4066	27	6.55958	4006	30	6.55958	3537	38	6.55958	3479	31	6.55958	3380	23	6.55958	3442	11	6.55958	3818	32	6.55958	3912	13	6.55958	4289	34	6.55958	4082	33	6.55958	3146	23	6.55958	3036	30
6.57179	4047	26	6.57179	4072	15	6.57179	3488	25	6.57179	3436	23	6.57179	3424	19	6.57179	3372	16	6.57179	3880	25	6.57179	3875	16	6.57179	4263	37	6.57179	4032	33	6.57179	3229	22	6.57179	3093	31
6.58401	3942	24	6.58401	3981	18	6.58401	3424	28	6.58401	3551	33	6.58401	3325	13	6.58401	3354	9	6.58401	3994	20	6.58401	3814	16	6.58401	4171	35	6.58401	4056	24	6.58401	3123	17	6.58401	3040	23
6.59622	4008	25	6.59622	4074	16	6.59622	3495	21	6.59622	3444	23	6.59622	3332	20	6.59622	3233	17	6.59622	3889	26	6.59622	3822	22	6.59622	4192	31	6.59622	4051	33	6.59622	3138	13	6.59622	3107	28
6.60844	3991	21	6.60844	3929	16	6.60844	3497	30	6.60844	3516	22	6.60844	3252	8	6.60844	3333	11	6.60844	3917	19	6.60844	3790	19	6.60844	4329	37	6.60844	4093	25	6.60844	3133	31	6.60844	3143	17
6.62065	4103	14	6.62065	4088	19	6.62065	3529	29	6.62065	3431	14	6.62065	3274	10	6.62065	3367	16	6.62065	3837	25	6.62065	3842	15	6.62065	4231	35	6.62065	4086	30	6.62065	3117	22	6.62065	3152	15
6.63287	3966	15	6.63287	4022	15	6.63287	3492	22	6.63287	3471	33	6.63287	3351	11	6.63287	3467	16	6.63287	3824	25	6.63287	3943	11	6.63287	4199	24	6.63287	4080	26	6.63287	3021	20	6.63287	3017	19
6.64508	4060	17	6.64508	4066	16	6.64508	3599	25	6.64508	3496	29	6.64508	3370	17	6.64508	3306	14	6.64508	3861	27	6.64508	4004	11	6.64508	4228	21	6.64508	4250	20	6.64508	3085	12	6.64508	3120	13
6.6573	3965	16	6.6573	4029	12	6.6573	3524	23	6.6573	3483	20	6.6573	3272	13	6.6573	3327	11	6.6573	3797	26	6.6573	3838	20	6.6573	4234	22	6.6573	4132	27	6.6573	2999	15	6.6573	3034	18
6.66951	4041	20	6.66951	4026	14	6.66951	3525	12	6.66951	3405	11	6.66951	3334	10	6.66951	3319	10	6.66951	3838	23	6.66951	3856	10	6.66951	4111	18	6.66951	4070	17	6.66951	3175	18	6.66951	3112	17
6.68173	4020	14	6.68173	4026	22	6.68173	3511	29	6.68173	3504	12	6.68173	3385	8	6.68173	3353	11	6.68173	3818	24	6.68173	3924	12	6.68173	4118	14	6.68173	4051	32	6.68173	3066	16	6.68173	3088	14
6.69394	4004	19	6.69394	4099	17	6.69394	3448	16	6.69394	3503	10	6.69394	3360	12	6.69394	3348	9	6.69394	3897	13	6.69394	3850	12	6.69394	4169	24	6.69394	4147	28	6.69394	3125	20	6.69394	3070	17
6.70616	3981	23	6.70616	4012	14	6.70616	3459	17	6.70616	3450	17	6.70616	3357	4	6.70616	3366	13	6.70616	3845	27	6.70616	3858	14	6.70616	4133	31	6.70616	4016	33	6.70616	3071	12	6.70616	3019	10
6.71838	3934	16	6.71838	3957	10	6.71838	3437	20	6.71838	3516	16	6.71838	3319	14	6.71838	3184	9	6.71838	3850	19	6.71838	3927	10	6.71838	4117	27	6.71838	4133	24	6.71838	3054	15	6.71838	3004	14
6.73059	3930	7	6.73059	3974	11	6.73059	3506	10	6.73059	3411	14	6.73059	3432	19	6.73059	3292	12	6.73059	3725	20	6.73059	3776	10	6.73059	4209	20	6.73059	4001	21	6.73059	3073	13	6.73059	3076	13
6.74281	3949	11	6.74281	3961	10	6.74281	3450	18	6.74281	3470	16	6.74281	3395	6	6.74281	3329	8	6.74281	3774	17	6.74281	3691	7	6.74281	4165	19	6.74281	3958	18	6.74281	2978	19	6.74281	3047	13
6.75502	4040	15	6.75502	4050	12	6.75502	3392	19	6.75502	3527	19	6.75502	3271	7	6.75502	3334	8	6.75502	3849	19	6.75502	3962	11	6.75502	4096	19	6.75502	3990	19	6.75502	3119	17	6.75502	3075	13
6.76724	3991	9	6.76724	3893	14	6.76724	3541	19	6.76724	3470	11	6.76724	3259	7	6.76724	3201	8	6.76724	3699	25	6.76724	3773	13	6.76724	4110	14	6.76724	3909	14	6.76724	3009	12	6.76724	3022	7
6.77945	3890	13	6.77945	3870	11	6.77945	3405	16	6.77945	3409	11	6.77945	3246	11	6.77945	3208	7	6.77945	3828	21	6.77945	3687	5	6.77945	4048	15	6.77945	4052	16	6.77945	2949	14	6.77945	2959	3
6.79167	3853	13	6.79167	3811	8	6.79167	3393	15	6.79167	3205	14	6.79167	3302	10	6.79167	3155	12	6.79167	3632	13	6.79167	3700	13	6.79167	4016	17	6.79167	3895	14	6.79167	2977	11	6.79167	3024	16
6.80388	3750	13	6.80388	3915	15	6.80388	3331	20	6.80388	3414	12	6.80388	3153	15	6.80388	3172	6	6.80388	3655	13	6.80388	3650	9	6.80388	3938	17	6.80388	3837	17	6.80388	2980	17	6.80388	2906	12
6.8161	3674	16	6.8161	3868	8	6.8161	3286	16	6.8161	3238	23	6.8161	3190	5	6.8161	3126	4	6.8161	3616	17	6.8161	3741	14	6.8161	4031	13	6.8161	3902	13	6.8161	2896	12	6.8161	2976	12
6.82831	3917	4	6.82831	3785	11	6.82831	3354	14	6.82831	3244	12	6.82831	3103	9	6.82831	3188	12	6.82831	3708	12	6.82831	3749	8	6.82831	3911	17	6.82831	3797	9	6.82831	2893	10	6.82831	2937	10
6.84053	3700	12	6.84053	3697	10	6.84053	3296	16	6.84053	3248	14	6.84053	3215	5	6.84053	3138	12	6.84053	3669	13	6.84053	3749	9	6.84053	3836	15	6.84053	3794	16	6.84053	2876	12	6.84053	2919	15
6.85274	3734	11	6.85274	3780	14	6.85274	3168	14	6.85274	3174	13	6.85274	3193	7	6.85274	3064	5	6.85274	3608	15	6.85274	3661	11	6.85274	4016	17	6.85274	3718	10	6.85274	2834	11	6.85274	2885	4
6.86496	3780	10	6.86496	3706	12	6.86496	3277	16	6.86496	3200	11	6.86496	3148	6	6.86496	3153	8	6.86496	3582	12	6.86496	3654	7	6.86496	3892	13	6.86496	3809	13	6.86496	2855	14	6.86496	2775	13
6.87717	3661	8	6.87717	3667	4	6.87717	3189	13	6.87717	3222	21	6.87717	3093	4	6.87717	3107	7	6.87717	3521	12	6.87717	3550	6	6.87717	3837	20	6.87717	3757	11	6.87717	2870	12	6.87717	2905	8
6.88939	3642	13	6.88939	3656	10	6.88939	3329	16	6.88939	3184	7	6.88939	3045	9	6.88939	2962	4	6.88939	3527	18	6.88939	3494	6	6.88939	3851	12	6.88939	3779	10	6.88939	2756	2	6.88939	2875	8
6.9016	3686	7	6.9016	3657	7	6.9016	3209	13	6.9016	3146	9	6.9016	3011	12	6.9016	2997	4	6.9016	3553	16	6.9016	3475	11	6.9016	3901	13	6.9016	3677	7	6.9016	2718	9	6.9016	2722	5
6.91382	3631	16	6.91382	3549	6	6.91382	3134	9	6.91382	3251	10	6.91382	3076	4	6.91382	2951	6	6.91382	3421	11	6.91382	3608	11	6.91382	3644	16	6.91382	3668	12	6.91382	2760	8	6.91382	2711	9
6.92603	3720	6	6.92603	3693	7	6.92603	3128	9	6.92603	3066	12	6.92603	2990	5	6.92603	3110	11	6.92603	3484	7	6.92603	3470	3	6.92603	3642	7	6.92603	3700	10	6.92603	2801	9	6.92603	2685	8
6.93825	3572	7	6.93825	3600	9	6.93825	3194	7	6.93825	3143	11	6.93825	3077	4	6.93825	3039	5	6.93825	3384	10	6.93825	3334	4	6.93825	3708	6	6.93825	3671	14	6.93825	2830	8	6.93825	2653	8
6.95046	3519	14	6.95046	3570	8	6.95046	3119	15	6.95046	3116	10	6.95046	3039	5	6.95046	2965	1	6.95046	3343	14	6.95046	3457	7	6.95046	3870	14	6.95046	3631	12	6.95046	2654	9	6.95046	2724	8
6.96268	3523	6	6.96268	3737	4	6.96268	3073	12	6.96268	3045	3	6.96268	2969	6	6.96268	2998	8	6.96268	3399	6	6.96268	3384	11	6.96268	3647	10	6.96268	3609	11	6.96268	2741	8	6.96268	2771	7
6.9749	3605	10	6.9749	3589	10	6.9749	3250	10	6.9749	3066	11	6.9749	2985	3	6.9749	3056	6	6.9749	3385	11	6.9749	3406	7	6.9749	3651	11	6.9749	3638	11	6.9749	2706	9	6.9749	2771	10
6.98711	3543	7	6.98711	3604	9	6.98711	3246	14	6.98711	3051	7	6.98711	3050	1	6.98711	2903	5	6.98711	3405	8	6.98711	3419	5	6.98711	3768	8	6.98711	3492	5	6.98711	2805	6	6.98711	2715	6
6.99933	3570	5	6.99933	3497	7	6.99933	3093	12	6.99933	3049	11	6.99933	2874	11	6.99933	2946	7	6.99933	3449	8	6.99933	3308	3	6.99933	3789	10	6.99933	3540	5	6.99933	2653	9	6.99933	2679	2
7.01154	3514	6	7.01154	3568	7	7.01154	3202	12	7.01154	3019	5	7.01154	2931	5	7.01154	2988	8	7.01154	3453	16	7.01154	3522	9	7.01154	3732	11	7.01154	3567	8	7.01154	2782	7	7.01154	2666	4
7.02376	3603	4	7.02376	3549	10	7.02376	3149	10	7.02376	3160	8	7.02376	3028	7	7.02376	2928	3	7.02376	3386	11	7.02376	3384	9	7.02376	3681	15	7.02376	3602	6	7.02376	2704	7	7.02376	2727	5
7.03597	3666	7	7.03597	3470	10	7.03597	3086	12	7.03597	3043	3	7.03597	3015	7	7.03597	3000	5	7.03597	3413	12	7.03597	3407	6	7.03597	3770	14	7.03597	3530	13	7.03597	2632	9	7.03597	2694	5
7.04819	3449	6	7.04819	3544	3	7.04819	3106	6	7.04819	3100	9	7.04819	2934	3	7.04819	3056	2	7.04819	3437	18	7.04819	3407	11	7.04819	3726	6	7.04819	3589	9	7.04819	2684	9	7.04819	2662	5
7.0604	3613	7	7.0604	3527	12	7.0604	3080	10	7.0604	3066	5	7.0604	2980	6	7.0604	2885	6	7.0604	3392	13	7.0604	3418	3	7.0604	3679	9	7.0604	3536	7	7.0604	2712	6	7.0604	2657	5
7.07262	3572	11	7.07262	3640	4	7.07262	3022	13	7.07262	3060	10	7.07262	2868	6	7.07262	2915	10	7.07262	3377	9	7.07262	3464	3	7.07262	3687	9	7.07262	3431	5	7.07262	2630	6	7.07262	2583	7
7.08483	3603	7	7.08483	3462	5	7.08483	3162	5	7.08483	3109	7	7.08483	2922	1	7.08483	2912	5	7.08483	3286	8	7.08483	3346	6	7.08483	3645	10	7.08483	3696	9	7.08483	2707	6	7.08483	2572	8
7.09705	3625	7	7.09705	3439	9	7.09705	3069	11	7.09705	3071	15	7.09705	2951	8	7.09705	2993	2	7.09705	3443	9	7.09705	3408	5	7.09705	3736	8	7.09705	3549	8	7.09705	2658	9	7.09705	2597	8
7.10926	3510	10	7.10926	3447	12	7.10926	3021	10	7.10926	3040	17	7.10926	2899	2	7.10926	2981	2	7.10926	3436	9	7.10926	3367	8	7.10926	3751	11	7.10926	3521	7	7.10926	2590	0	7.10926	2622	4
7.12148	3486	6	7.12148	3508	10	7.12148	3069	7	7.12148	3064	9	7.12148	2952	5	7.12148	2944	6	7.12148	3305	15	7.12148	3243	9	7.12148	3633	10	7.12148	3564	5	7.12148	2636	5	7.12148	2629	5
7.13369	3534	6	7.13369	3482	9	7.13369	2969	6	7.13369	3013	10	7.13369	3007	10	7.13369	2940	4	7.13369	3374	3	7.13369	3314	5	7.13369	3620	10	7.13369	3572	9	7.13369	2715	5	7.13369	2662	11
7.14591	3418	4	7.14591	3377	3	7.14591	3058	8	7.14591	3029	12	7.14591	3000	4	7.14591	2879	5	7.14591	3298	10	7.14591	3317	10	7.14591	3585	9	7.14591	3479	6	7.14591	2672	5	7.14591	2551	3
7.15812	3503	13	7.15812	3497	5	7.15812	2966	9	7.15812	3096	13	7.15812	2977	5	7.15812	2876	1	7.15812	3282	8	7.15812	3298	9	7.15812	3514	7	7.15812	3407	10	7.15812	2665	10	7.15812	2620	10
7.17034	3449	10	7.17034	3412	5	7.17034	3032	3	7.17034	2989	13	7.17034	2894	5	7.17034	2809	6	7.17034	3392	9	7.17034	3399	4	7.17034	3586	8	7.17034	3358	4	7.17034	2608	4	7.17034	2660	5
7.18255	3504	10	7.18255	3506	4	7.18255	3016	9	7.18255	2978	9	7.18255	2905	6	7.18255	2892	2	7.18255	3235	8	7.18255	3277	6	7.18255	3661	4	7.18255	3374	15	7.18255	2596	7	7.18255	2556	6
7.19477	3383	4	7.19477	3444	5	7.19477	2940	5	7.19477	2953	7	7.19477	2954	7	7.19477	2960	4	7.19477	3210	9	7.19477	3301	5	7.19477	3481	9	7.19477	3459	10	7.19477	2644	5	7.19477	2623	6
7.20698	3497	7	7.20698	3309	3	7.20698	2982	8	7.20698	2911	8	7.20698	2810	9	7.20698	2844	5	7.20698	3258	9	7.20698	3217	5	7.20698	3500	12	7.20698	3477	8	7.20698	2565	6	7.20698	2438	4
7.2192	3431	7	7.2192	3402	4	7.2192	3035	4	7.2192	2841	11	7.2192	2792	2	7.2192	2902	5	7.2192	3292	9	7.2192	3192	5	7.2192	3395	4	7.2192	3400	13	7.2192	2535	7	7.2192	2557	6
7.23141	3446	3	7.23141	3368	6	7.23141	2945	11	7.23141	2917	9	7.23141	2830	7	7.23141	2753	2	7.23141	3204	7	7.23141	3128	7	7.23141	3489	11	7.23141	3369	7	7.23141	2535	5	7.23141	2429	5
7.24363	3317	4	7.24363	3343	6	7.24363	2908	10	7.24363	2939	8	7.24363	2901	6	7.24363	2803	5	7.24363	3211	12	7.24363	3081	3	7.24363	3439	6	7.24363	3404	8	7.24363	2571	3	7.24363	2507	8
7.25585	3380	6	7.25585	3287	2	7.25585	2961	15	7.25585	2921	8	7.25585	2816	5	7.25585	2878	7	7.25585	3204	8	7.25585	3325	3	7.25585	3376	9	7.25585	3436	7	7.25585	2406	9	7.25585	2495	6
7.26806	3337	6	7.26806	3263	4	7.26806	2968	8	7.26806	2873	5	7.26806	2739	5	7.26806	2687	6	7.26806	3317	9	7.26806	3248	9	7.26806	3506	4	7.26806	3424	5	7.26806	2487	7	7.26806	2556	7
7.28028	3335	6	7.28028	3305	3	7.28028	2952	9	7.28028	2811	12	7.28028	2717	8	7.28028	2747	6	7.28028	3197	11	7.28028	3148	11	7.28028	3485	7	7.28028	3431	5	7.28028	2537	4	7.28028	2570	7
7.29249	3307	6	7.29249	3140	6	7.29249	2965	11	7.29249	2911	6	7.29249	2868	6	7.29249	2721	2	7.29249	3218	11	7.29249	3244	3	7.29249	3313	4	7.29249	3386	10	7.29249	2417	8	7.29249	2520	5
7.30471	3197	6	7.30471	3244	9	7.30471	2939	9	7.30471	2847	7	7.30471	2870	2	7.30471	2776	10	7.30471	3153	13	7.30471	3258	1	7.30471	3400	8	7.30471	3315	8	7.30471	2587	6	7.30471	2526	9
7.31692	3207	6	7.31692	3308	7	7.31692	2880	10	7.31692	2915	6	7.31692	2811	4	7.31692	2831	2	7.31692	3144	9	7.31692	3177	8	7.31692	3373	2	7.31692	3305	6	7.31692	2448	7	7.31692	2447	7
7.32914	3246	6	7.32914	3270	1	7.32914	2896	7	7.32914	2829	11	7.32914	2822	4	7.32914	2737	4	7.32914	3108	8	7.32914	3168	1	7.32914	3276	7	7.32914	3337	6	7.32914	2490	6	7.32914	2482	4
7.34135	3375	8	7.34135	3157	4	7.34135	2828	13	7.34135	2838	10	7.34135	2798	5	7.34135	2686	2	7.34135	3078	4	7.34135	3273	10	7.34135	3311	10	7.34135	3252	5	7.34135	2526	11	7.34135	2490	10
7.35357	3233	10	7.35357	3279	6	7.35357	3044	11	7.35357	2824	7	7.35357	2703	0	7.35357	2667	3	7.35357	3186	12	7.35357	3160	2	7.35357	3369	6	7.35357	3303	5	7.35357	2444	3	7.35357	2419	6
7.36578	3306	5	7.36578	3322	9	7.36578	2908	10	7.36578	2834	11	7.36578	2786	6	7.36578	2752	5	7.36578	3126	11	7.36578	3214	8	7.36578	3284	4	7.36578	3270	7	7.36578	2480	9	7.36578	2470	4
7.378	3295	4	7.378	3176	5	7.378	2802	7	7.378	2758	3	7.378	2692	3	7.378	2727	1	7.378	3063	7	7.378	3065	7	7.378	3280	10	7.378	3305	9	7.378	2520	6	7.378	2442	5
7.39021	3327	4	7.39021	3149	8	7.39021	2885	9	7.39021	2817	7	7.39021	2635	4	7.39021	2721	6	7.39021	3085	9	7.39021	3094	9	7.39021	3473	12	7.39021	3275	11	7.39021	2564	5	7.39021	2329	1
7.40243	3191	8	7.40243	3209	4	7.40243	2771	5	7.40243	2868	9	7.40243	2648	8	7.40243	2654	5	7.40243	3004	6	7.40243	3120	8	7.40243	3231	5	7.40243	3302	5	7.40243	2420	5	7.40243	2396	6
7.41464	3195	5	7.41464	3192	7	7.41464	2803	6	7.41464	2789	9	7.41464	2695	3	7.41464	2615	3	7.41464	3040	10	7.41464	3066	8	7.41464	3328	3	7.41464	3218	8	7.41464	2348	4	7.41464	2290	7
7.42686	3109	10	7.42686	3161	5	7.42686	2861	9	7.42686	2672	5	7.42686	2675	1	7.42686	2681	5	7.42686	3025	8	7.42686	3045	5	7.42686	3399	8	7.42686	3202	3	7.42686	2345	4	7.42686	2305	5
7.43907	3196	3	7.43907	3115	12	7.43907	2765	10	7.43907	2727	3	7.43907	2691	6	7.43907	2657	3	7.43907	2968	10	7.43907	2931	4	7.43907	3224	7	7.43907	3201	3	7.43907	2392	4	7.43907	2328	7
7.45129	3106	9	7.45129	3152	8	7.45129	2769	6	7.45129	2669	5	7.45129	2596	3	7.45129	2582	5	7.45129	3048	7	7.45129	3087	6	7.45129	3205	4	7.45129	3088	6	7.45129	2404	3	7.45129	2309	0
7.4635	3115	2	7.4635	3060	6	7.4635	2749	10	7.4635	2636	5	7.4635	2671	6	7.4635	2680	3	7.4635	2977	10	7.4635	2915	7	7.4635	3152	2	7.4635	2998	8	7.4635	2412	7	7.4635	2314	9
7.47572	3077	8	7.47572	3022	4	7.47572	2663	9	7.47572	2692	5	7.47572	2627	3	7.47572	2591	5	7.47572	2971	6	7.47572	2945	12	7.47572	3141	8	7.47572	3084	5	7.47572	2250	6	7.47572	2213	3
7.48793	3051	7	7.48793	2903	6	7.48793	2698	13	7.48793	2633	3	7.48793	2610	3	7.48793	2560	2	7.48793	2959	5	7.48793	3007	4	7.48793	3192	4	7.48793	3020	4	7.48793	2310	7	7.48793	2336	4
7.50015	3028	10	7.50015	3022	6	7.50015	2679	13	7.50015	2611	4	7.50015	2552	6	7.50015	2477	7	7.50015	2865	7	7.50015	2925	5	7.50015	3092	4	7.50015	3103	7	7.50015	2243	6	7.50015	2343	7
7.51237	3036	5	7.51237	2948	4	7.51237	2592	9	7.51237	2589	8	7.51237	2553	3	7.51237	2435	4	7.51237	2931	6	7.51237	2973	6	7.51237	3031	6	7.51237	3119	2	7.51237	2263	3	7.51237	2226	5
7.52458	3101	5	7.52458	2914	4	7.52458	2584	9	7.52458	2593	3	7.52458	2500	2	7.52458	2545	5	7.52458	2823	5	7.52458	2889	4	7.52458	3072	11	7.52458	2878	5	7.52458	2311	4	7.52458	2342	4
7.5368	3008	7	7.5368	2989	8	7.5368	2743	7	7.5368	2560	9	7.5368	2481	6	7.5368	2583	2	7.5368	2928	6	7.5368	2897	6	7.5368	2982	6	7.5368	3036	6	7.5368	2247	6	7.5368	2214	9
7.54901	2832	8	7.54901	3018	3	7.54901	2582	6	7.54901	2582	1	7.54901	2479	3	7.54901	2574	4	7.54901	2801	9	7.54901	2861	6	7.54901	3006	6	7.54901	2960	7	7.54901	2239	7	7.54901	2239	4
7.56123	2969	6	7.56123	2952	6	7.56123	2587	8	7.56123	2586	1	7.56123	2582	8	7.56123	2444	4	7.56123	2812	8	7.56123	2826	3	7.56123	3044	5	7.56123	3035	5	7.56123	2290	5	7.56123	2170	5
7.57344	3028	2	7.57344	2909	3	7.57344	2488	14	7.57344	2511	11	7.57344	2548	5	7.57344	2526	5	7.57344	2794	11	7.57344	2871	9	7.57344	3027	5	7.57344	2917	3	7.57344	2241	6	7.57344	2223	6
7.58566	2932	6	7.58566	2940	3	7.58566	2517	7	7.58566	2587	13	7.58566	2634	3	7.58566	2463	6	7.58566	2812	9	7.58566	2868	6	7.58566	3024	3	7.58566	2978	3	7.58566	2189	5	7.58566	2251	2
7.59787	2892	6	7.59787	3001	2	7.59787	2582	9	7.59787	2536	8	7.59787	2516	5	7.59787	2585	3	7.59787	2863	8	7.59787	2923	2	7.59787	2974	6	7.59787	2951	8	7.59787	2249	4	7.59787	2158	3
7.61009	2923	6	7.61009	3000	6	7.61009	2540	7	7.61009	2523	7	7.61009	2490	2	7.61009	2487	3	7.61009	2796	9	7.61009	2828	2	7.61009	3059	8	7.61009	2993	7	7.61009	2207	9	7.61009	2135	6
7.6223	3010	5	7.6223	2877	6	7.6223	2560	5	7.6223	2555	7	7.6223	2420	2	7.6223	2468	4	7.6223	2928	9	7.6223	2858	6	7.6223	3017	7	7.6223	2990	4	7.6223	2127	7	7.6223	2180	3
7.63452	2939	4	7.63452	2872	4	7.63452	2510	4	7.63452	2554	5	7.63452	2465	6	7.63452	2576	2	7.63452	2824	8	7.63452	2915	5	7.63452	3058	8	7.63452	2907	8	7.63452	2286	2	7.63452	2143	4
7.64673	2992	8	7.64673	2972	7	7.64673	2501	8	7.64673	2503	4	7.64673	2608	7	7.64673	2541	5	7.64673	2752	5	7.64673	2814	2	7.64673	2938	9	7.64673	2918	7	7.64673	2159	6	7.64673	2223	1
7.65895	3031	5	7.65895	2944	6	7.65895	2516	3	7.65895	2527	6	7.65895	2448	5	7.65895	2480	3	7.65895	2817	9	7.65895	2871	3	7.65895	2975	8	7.65895	2927	11	7.65895	2203	10	7.65895	2195	6
7.67116	3044	9	7.67116	2824	3	7.67116	2577	9	7.67116	2508	7	7.67116	2615	4	7.67116	2393	8	7.67116	2841	10	7.67116	2817	7	7.67116	3123	7	7.67116	2968	4	7.67116	2215	4	7.67116	2214	4
7.68338	3035	6	7.68338	2959	5	7.68338	2633	9	7.68338	2488	6	7.68338	2533	3	7.68338	2541	9	7.68338	2930	10	7.68338	2805	5	7.68338	3037	6	7.68338	2910	4	7.68338	2197	2	7.68338	2111	3
7.69559	2905	6	7.69559	3014	7	7.69559	2541	10	7.69559	2615	8	7.69559	2481	4	7.69559	2492	1	7.69559	2784	10	7.69559	2818	2	7.69559	3039	6	7.69559	2829	7	7.69559	2160	6	7.69559	2155	2
7.70781	3090	1	7.70781	2962	8	7.70781	2484	13	7.70781	2608	9	7.70781	2422	3	7.70781	2533	2	7.70781	2829	11	7.70781	2871	5	7.70781	3050	6	7.70781	2976	5	7.70781	2150	5	7.70781	2231	3
7.72002	2917	7	7.72002	2934	2	7.72002	2545	8	7.72002	2482	8	7.72002	2491	4	7.72002	2457	4	7.72002	2794	15	7.72002	2840	5	7.72002	2970	10	7.72002	2830	7	7.72002	2173	5	7.72002	2216	4
7.73224	2895	5	7.73224	2981	2	7.73224	2641	11	7.73224	2559	8	7.73224	2512	3	7.73224	2415	2	7.73224	2832	4	7.73224	2804	6	7.73224	3010	4	7.73224	2887	6	7.73224	2128	6	7.73224	2196	6
7.74445	3009	11	7.74445	2977	2	7.74445	2513	6	7.74445	2542	7	7.74445	2467	4	7.74445	2451	5	7.74445	2806	10	7.74445	2868	4	7.74445	3051	10	7.74445	2892	13	7.74445	2166	4	7.74445	2199	3
7.75667	2906	8	7.75667	2905	7	7.75667	2484	17	7.75667	2567	7	7.75667	2446	5	7.75667	2501	3	7.75667	2798	8	7.75667	2966	5	7.75667	3041	8	7.75667	2937	8	7.75667	2190	10	7.75667	2100	5
7.76888	2795	8	7.76888	2771	9	7.76888	2626	9	7.76888	2495	10	7.76888	2444	1	7.76888	2432	8	7.76888	2779	6	7.76888	2777	3	7.76888	2955	7	7.76888	2763	7	7.76888	2149	6	7.76888	2149	5
7.7811	2887	2	7.7811	2798	3	7.7811	2631	9	7.7811	2564	6	7.7811	2349	5	7.7811	2405	2	7.7811	2812	9	7.7811	2820	4	7.7811	2962	7	7.7811	2926	4	7.7811	2068	6	7.7811	2202	4
7.79332	2880	6	7.79332	2904	4	7.79332	2557	9	7.79332	2497	9	7.79332	2411	6	7.79332	2399	2	7.79332	2669	6	7.79332	2777	4	7.79332	2835	4	7.79332	2879	6	7.79332	2070	6	7.79332	2184	8
7.80553	2863	6	7.80553	2788	4	7.80553	2519	8	7.80553	2398	5	7.80553	2446	3	7.80553	2351	3	7.80553	2712	6	7.80553	2767	8	7.80553	2900	5	7.80553	2804	5	7.80553	2142	6	7.80553	2161	4
7.81775	2884	2	7.81775	2728	8	7.81775	2399	4	7.81775	2528	6	7.81775	2475	3	7.81775	2315	2	7.81775	2791	9	7.81775	2742	3	7.81775	2911	3	7.81775	2862	6	7.81775	2171	9	7.81775	2156	8
7.82996	2885	5	7.82996	2889	11	7.82996	2396	8	7.82996	2484	4	7.82996	2348	4	7.82996	2376	4	7.82996	2735	6	7.82996	2724	5	7.82996	2965	7	7.82996	2764	3	7.82996	2224	5	7.82996	2055	6
7.84218	2980	7	7.84218	2890	8	7.84218	2541	7	7.84218	2560	7	7.84218	2275	5	7.84218	2265	5	7.84218	2685	14	7.84218	2715	7	7.84218	2916	7	7.84218	2865	6	7.84218	2064	5	7.84218	2116	1
7.85439	2826	9	7.85439	2807	7	7.85439	2480	9	7.85439	2437	5	7.85439	2384	3	7.85439	2332	2	7.85439	2729	14	7.85439	2728	5	7.85439	2742	7	7.85439	2787	5	7.85439	2090	3	7.85439	2050	9
7.86661	2816	6	7.86661	2772	7	7.86661	2526	5	7.86661	2368	7	7.86661	2301	2	7.86661	2349	7	7.86661	2768	9	7.86661	2679	9	7.86661	2801	6	7.86661	2681	5	7.86661	2134	3	7.86661	2005	8
7.87882	2792	4	7.87882	2842	7	7.87882	2410	7	7.87882	2444	9	7.87882	2361	5	7.87882	2276	5	7.87882	2622	6	7.87882	2658	7	7.87882	2967	4	7.87882	2712	4	7.87882	2127	2	7.87882	2021	3
7.89104	2805	8	7.89104	2789	8	7.89104	2383	7	7.89104	2418	1	7.89104	2395	7	7.89104	2425	1	7.89104	2637	7	7.89104	2713	2	7.89104	2736	8	7.89104	2654	12	7.89104	2015	7	7.89104	2022	5
7.90325	2848	4	7.90325	2821	4	7.90325	2359	9	7.90325	2391	5	7.90325	2359	7	7.90325	2375	7	7.90325	2641	7	7.90325	2670	3	7.90325	2888	7	7.90325	2786	8	7.90325	2078	4	7.90325	2018	2
7.91547	2760	6	7.91547	2704	3	7.91547	2474	7	7.91547	2333	6	7.91547	2396	1	7.91547	2353	4	7.91547	2624	6	7.91547	2699	6	7.91547	2751	7	7.91547	2665	1	7.91547	2129	7	7.91547	1952	7
7.92768	2689	3	7.92768	2664	7	7.92768	2373	7	7.92768	2323	9	7.92768	2355	3	7.92768	2280	10	7.92768	2551	9	7.92768	2686	5	7.92768	2786	8	7.92768	2722	9	7.92768	2068	6	7.92768	1958	7
7.9399	2712	5	7.9399	2746	6	7.9399	2393	6	7.9399	2285	6	7.9399	2384	2	7.9399	2295	1	7.9399	2635	7	7.9399	2589	1	7.9399	2834	4	7.9399	2623	6	7.9399	2008	6	7.9399	1958	2
7.95211	2762	4	7.95211	2777	5	7.95211	2436	4	7.95211	2398	6	7.95211	2320	3	7.95211	2354	4	7.95211	2753	3	7.95211	2656	3	7.95211	2788	4	7.95211	2656	9	7.95211	2070	5	7.95211	1894	3
7.96433	2661	4	7.96433	2786	3	7.96433	2312	3	7.96433	2324	5	7.96433	2262	0	7.96433	2353	2	7.96433	2642	12	7.96433	2652	3	7.96433	2743	5	7.96433	2851	3	7.96433	1957	6	7.96433	1930	9
7.97654	2845	6	7.97654	2701	2	7.97654	2393	11	7.97654	2304	6	7.97654	2326	5	7.97654	2345	7	7.97654	2562	16	7.97654	2582	4	7.97654	2742	5	7.97654	2749	4	7.97654	1950	8	7.97654	2022	3
7.98876	2712	7	7.98876	2573	6	7.98876	2197	5	7.98876	2345	3	7.98876	2284	6	7.98876	2245	5	7.98876	2596	11	7.98876	2576	3	7.98876	2736	3	7.98876	2659	5	7.98876	1966	6	7.98876	1963	1
8.00097	2664	7	8.00097	2639	0	8.00097	2385	8	8.00097	2312	5	8.00097	2229	4	8.00097	2321	3	8.00097	2534	11	8.00097	2561	5	8.00097	2799	8	8.00097	2634	3	8.00097	2065	4	8.00097	1946	4
8.01319	2667	5	8.01319	2687	7	8.01319	2434	5	8.01319	2289	5	8.01319	2239	7	8.01319	2206	6	8.01319	2547	9	8.01319	2598	5	8.01319	2642	7	8.01319	2591	3	8.01319	2012	2	8.01319	1991	1
8.0254	2511	3	8.0254	2645	2	8.0254	2330	6	8.0254	2231	6	8.0254	2227	2	8.0254	2333	5	8.0254	2506	6	8.0254	2578	3	8.0254	2781	6	8.0254	2560	7	8.0254	1992	5	8.0254	1898	7
8.03762	2523	5	8.03762	2605	4	8.03762	2284	5	8.03762	2259	5	8.03762	2150	6	8.03762	2236	3	8.03762	2471	6	8.03762	2473	8	8.03762	2581	4	8.03762	2606	5	8.03762	1950	2	8.03762	1942	2
8.04984	2504	6	8.04984	2624	7	8.04984	2253	7	8.04984	2279	6	8.04984	2239	4	8.04984	2209	4	8.04984	2498	3	8.04984	2526	3	8.04984	2680	8	8.04984	2572	4	8.04984	1907	5	8.04984	1957	3
8.06205	2685	4	8.06205	2572	4	8.06205	2250	6	8.06205	2172	5	8.06205	2224	6	8.06205	2174	0	8.06205	2551	8	8.06205	2519	5	8.06205	2603	10	8.06205	2555	7	8.06205	1921	8	8.06205	1854	4
8.07427	2648	11	8.07427	2558	8	8.07427	2251	6	8.07427	2261	6	8.07427	2285	2	8.07427	2106	2	8.07427	2544	1	8.07427	2480	3	8.07427	2653	7	8.07427	2546	2	8.07427	1950	5	8.07427	1885	2
8.08648	2613	8	8.08648	2517	4	8.08648	2283	5	8.08648	2266	7	8.08648	2279	2	8.08648	2258	2	8.08648	2447	7	8.08648	2474	4	8.08648	2566	3	8.08648	2568	7	8.08648	1910	5	8.08648	1891	3
8.0987	2588	5	8.0987	2537	5	8.0987	2249	7	8.0987	2235	13	8.0987	2209	4	8.0987	2239	4	8.0987	2445	7	8.0987	2521	3	8.0987	2584	2	8.0987	2505	6	8.0987	1889	0	8.0987	1911	4
8.11091	2534	3	8.11091	2505	6	8.11091	2293	3	8.11091	2180	9	8.11091	2133	2	8.11091	2104	4	8.11091	2464	11	8.11091	2553	4	8.11091	2588	7	8.11091	2542	4	8.11091	1920	4	8.11091	1894	4
8.12313	2623	7	8.12313	2493	5	8.12313	2198	2	8.12313	2150	2	8.12313	2141	2	8.12313	2150	3	8.12313	2533	7	8.12313	2488	5	8.12313	2590	5	8.12313	2540	4	8.12313	1918	4	8.12313	1796	3
8.13534	2596	4	8.13534	2516	5	8.13534	2316	7	8.13534	2171	9	8.13534	2148	10	8.13534	2109	3	8.13534	2479	10	8.13534	2532	7	8.13534	2638	5	8.13534	2502	5	8.13534	1861	3	8.13534	1933	3
8.14756	2506	7	8.14756	2498	3	8.14756	2240	2	8.14756	2192	5	8.14756	2185	2	8.14756	2224	2	8.14756	2531	11	8.14756	2533	7	8.14756	2537	2	8.14756	2522	3	8.14756	1877	0	8.14756	1827	3
8.15977	2579	7	8.15977	2528	6	8.15977	2254	6	8.15977	2176	12	8.15977	2177	2	8.15977	2156	4	8.15977	2453	5	8.15977	2430	1	8.15977	2623	4	8.15977	2440	5	8.15977	1942	6	8.15977	1849	3
8.17199	2456	4	8.17199	2469	4	8.17199	2119	6	8.17199	2260	5	8.17199	2196	3	8.17199	2065	2	8.17199	2487	5	8.17199	2481	4	8.17199	2542	7	8.17199	2515	4	8.17199	1867	5	8.17199	1851	6
8.1842	2506	12	8.1842	2501	3	8.1842	2218	6	8.1842	2198	8	8.1842	2151	7	8.1842	2116	6	8.1842	2397	9	8.1842	2381	3	8.1842	2519	7	8.1842	2462	4	8.1842	1888	3	8.1842	1916	2
8.19642	2568	4	8.19642	2497	2	8.19642	2171	7	8.19642	2260	8	8.19642	2068	5	8.19642	2121	1	8.19642	2383	7	8.19642	2506	6	8.19642	2536	4	8.19642	2466	3	8.19642	1909	2	8.19642	1814	4
8.20863	2495	3	8.20863	2480	1	8.20863	2138	6	8.20863	2189	5	8.20863	2183	1	8.20863	2036	4	8.20863	2440	8	8.20863	2410	4	8.20863	2581	4	8.20863	2575	8	8.20863	1799	3	8.20863	1866	3
8.22085	2578	3	8.22085	2569	2	8.22085	2220	9	8.22085	2209	8	8.22085	2132	3	8.22085	2164	2	8.22085	2373	7	8.22085	2456	3	8.22085	2518	7	8.22085	2413	2	8.22085	1863	2	8.22085	1835	1
8.23306	2552	3	8.23306	2537	4	8.23306	2225	8	8.23306	2083	7	8.23306	2144	4	8.23306	2098	4	8.23306	2431	9	8.23306	2532	2	8.23306	2600	4	8.23306	2496	6	8.23306	1884	5	8.23306	1800	4
8.24528	2526	7	8.24528	2435	3	8.24528	2124	5	8.24528	2242	7	8.24528	2153	2	8.24528	2126	7	8.24528	2440	5	8.24528	2459	4	8.24528	2484	4	8.24528	2459	6	8.24528	1826	7	8.24528	1800	2
8.25749	2527	8	8.25749	2420	2	8.25749	2143	7	8.25749	2067	1	8.25749	2076	8	8.25749	2127	3	8.25749	2398	7	8.25749	2476	10	8.25749	2518	4	8.25749	2391	7	8.25749	1843	3	8.25749	1790	4
8.26971	2527	3	8.26971	2420	9	8.26971	2206	4	8.26971	2144	5	8.26971	2140	4	8.26971	2087	2	8.26971	2386	2	8.26971	2429	5	8.26971	2532	4	8.26971	2453	8	8.26971	1877	2	8.26971	1813	3
8.28192	2488	5	8.28192	2456	4	8.28192	2194	5	8.28192	2084	0	8.28192	2109	2	8.28192	2161	4	8.28192	2345	8	8.28192	2460	3	8.28192	2476	3	8.28192	2464	4	8.28192	1768	6	8.28192	1880	3
8.29414	2584	3	8.29414	2459	3	8.29414	2113	4	8.29414	2235	3	8.29414	2099	4	8.29414	2056	4	8.29414	2375	8	8.29414	2417	5	8.29414	2522	4	8.29414	2420	3	8.29414	1875	2	8.29414	1807	4
8.30635	2513	6	8.30635	2494	3	8.30635	2155	9	8.30635	2150	1	8.30635	2082	2	8.30635	2152	3	8.30635	2347	6	8.30635	2344	2	8.30635	2526	3	8.30635	2370	8	8.30635	1836	8	8.30635	1796	2
8.31857	2515	9	8.31857	2455	3	8.31857	2162	6	8.31857	2189	6	8.31857	2185	4	8.31857	2020	2	8.31857	2354	3	8.31857	2363	7	8.31857	2530	4	8.31857	2504	9	8.31857	1776	4	8.31857	1850	4
8.33079	2449	5	8.33079	2368	2	8.33079	2082	3	8.33079	2049	9	8.33079	2045	3	8.33079	2098	3	8.33079	2375	7	8.33079	2331	5	8.33079	2568	3	8.33079	2463	2	8.33079	1803	3	8.33079	1826	3
8.343	2397	6	8.343	2389	5	8.343	2222	3	8.343	2174	8	8.343	2151	3	8.343	2022	5	8.343	2388	4	8.343	2484	4	8.343	2527	6	8.343	2463	3	8.343	1770	11	8.343	1819	3
8.35522	2486	5	8.35522	2420	4	8.35522	2131	6	8.35522	2073	2	8.35522	2008	4	8.35522	2118	7	8.35522	2452	7	8.35522	2336	2	8.35522	2487	8	8.35522	2377	7	8.35522	1781	9	8.35522	1833	1
8.36743	2412	3	8.36743	2403	2	8.36743	2177	4	8.36743	2157	5	8.36743	2080	6	8.36743	2074	2	8.36743	2250	6	8.36743	2298	4	8.36743	2449	10	8.36743	2332	3	8.36743	1756	4	8.36743	1782	4
8.37965	2432	3	8.37965	2359	5	8.37965	2135	10	8.37965	2098	5	8.37965	2040	3	8.37965	2045	3	8.37965	2267	3	8.37965	2364	4	8.37965	2434	4	8.37965	2351	0	8.37965	1698	2	8.37965	1719	8
8.39186	2449	6	8.39186	2432	2	8.39186	2142	6	8.39186	2107	6	8.39186	2043	3	8.39186	2167	3	8.39186	2263	8	8.39186	2347	6	8.39186	2462	8	8.39186	2353	8	8.39186	1794	6	8.39186	1803	4
8.40408	2465	3	8.40408	2428	3	8.40408	2014	2	8.40408	2009	7	8.40408	2003	4	8.40408	2061	1	8.40408	2324	7	8.40408	2336	3	8.40408	2490	7	8.40408	2397	7	8.40408	1748	4	8.40408	1708	3
8.41629	2361	7	8.41629	2378	8	8.41629	2043	7	8.41629	2034	3	8.41629	1974	5	8.41629	1973	3	8.41629	2310	13	8.41629	2323	2	8.41629	2504	2	8.41629	2398	3	8.41629	1791	4	8.41629	1631	2
8.42851	2445	4	8.42851	2372	2	8.42851	2083	7	8.42851	2074	6	8.42851	2066	5	8.42851	2016	3	8.42851	2287	5	8.42851	2293	4	8.42851	2455	2	8.42851	2318	6	8.42851	1719	2	8.42851	1779	5
8.44072	2379	8	8.44072	2306	6	8.44072	2069	6	8.44072	1991	6	8.44072	2006	4	8.44072	2034	1	8.44072	2303	4	8.44072	2263	3	8.44072	2385	5	8.44072	2408	4	8.44072	1706	7	8.44072	1758	5
8.45294	2384	7	8.45294	2346	3	8.45294	2053	9	8.45294	2082	5	8.45294	2053	2	8.45294	2029	6	8.45294	2330	8	8.45294	2332	2	8.45294	2338	1	8.45294	2394	6	8.45294	1751	3	8.45294	1597	7
8.46515	2361	7	8.46515	2345	1	8.46515	2114	4	8.46515	2065	4	8.46515	1983	7	8.46515	2013	4	8.46515	2233	5	8.46515	2252	3	8.46515	2394	6	8.46515	2419	1	8.46515	1665	6	8.46515	1726	1
8.47737	2421	2	8.47737	2413	4	8.47737	2013	4	8.47737	2032	6	8.47737	1897	4	8.47737	1998	2	8.47737	2223	6	8.47737	2327	7	8.47737	2394	4	8.47737	2276	6	8.47737	1687	5	8.47737	1598	1
8.48958	2212	2	8.48958	2298	3	8.48958	2031	11	8.48958	1960	5	8.48958	1990	3	8.48958	1969	2	8.48958	2303	8	8.48958	2230	4	8.48958	2322	6	8.48958	2349	6	8.48958	1737	2	8.48958	1645	1
8.5018	2332	6	8.5018	2317	7	8.5018	2036	7	8.5018	2007	4	8.5018	1994	4	8.5018	1977	4	8.5018	2191	12	8.5018	2250	7	8.5018	2351	4	8.5018	2291	7	8.5018	1726	7	8.5018	1675	6
8.51401	2371	5	8.51401	2340	3	8.51401	2034	7	8.51401	1909	7	8.51401	1967	3	8.51401	2041	9	8.51401	2329	4	8.51401	2232	6	8.51401	2417	4	8.51401	2279	3	8.51401	1683	6	8.51401	1728	1
8.52623	2379	6	8.52623	2301	2	8.52623	2070	7	8.52623	2032	3	8.52623	1962	4	8.52623	1893	4	8.52623	2236	9	8.52623	2231	5	8.52623	2360	3	8.52623	2267	5	8.52623	1668	9	8.52623	1616	7
8.53844	2324	4	8.53844	2278	2	8.53844	1985	3	8.53844	1934	10	8.53844	2004	2	8.53844	2026	2	8.53844	2232	6	8.53844	2158	4	8.53844	2332	3	8.53844	2299	10	8.53844	1697	7	8.53844	1681	3
8.55066	2352	4	8.55066	2378	4	8.55066	2002	5	8.55066	1977	4	8.55066	2075	3	8.55066	1999	1	8.55066	2279	5	8.55066	2289	3	8.55066	2340	6	8.55066	2321	6	8.55066	1735	5	8.55066	1648	4
8.56287	2420	3	8.56287	2340	7	8.56287	1957	4	8.56287	2006	7	8.56287	1948	2	8.56287	1918	2	8.56287	2169	8	8.56287	2266	3	8.56287	2325	4	8.56287	2244	2	8.56287	1715	6	8.56287	1642	4
8.57509	2298	4	8.57509	2237	2	8.57509	1971	6	8.57509	2061	5	8.57509	1910	7	8.57509	1927	2	8.57509	2176	8	8.57509	2152	3	8.57509	2306	4	8.57509	2271	6	8.57509	1656	5	8.57509	1681	5
8.58731	2261	4	8.58731	2288	2	8.58731	1958	6	8.58731	1949	4	8.58731	1928	0	8.58731	1985	4	8.58731	2132	10	8.58731	2240	3	8.58731	2327	3	8.58731	2270	2	8.58731	1637	3	8.58731	1610	5
8.59952	2319	2	8.59952	2233	1	8.59952	1931	7	8.59952	2007	8	8.59952	1957	2	8.59952	1968	0	8.59952	2236	8	8.59952	2193	0	8.59952	2392	4	8.59952	2259	3	8.59952	1669	3	8.59952	1630	5
8.61174	2232	3	8.61174	2258	3	8.61174	1966	3	8.61174	1947	6	8.61174	1941	2	8.61174	1910	3	8.61174	2146	7	8.61174	2242	4	8.61174	2443	3	8.61174	2263	6	8.61174	1665	4	8.61174	1652	3
8.62395	2261	6	8.62395	2149	3	8.62395	1986	3	8.62395	1957	5	8.62395	1907	6	8.62395	1847	5	8.62395	2193	10	8.62395	2116	1	8.62395	2239	10	8.62395	2119	5	8.62395	1584	2	8.62395	1601	3
8.63617	2298	2	8.63617	2225	2	8.63617	2009	5	8.63617	1998	1	8.63617	1975	3	8.63617	1902	3	8.63617	2258	8	8.63617	2152	1	8.63617	2260	4	8.63617	2213	1	8.63617	1680	0	8.63617	1730	2
8.64838	2241	10	8.64838	2294	6	8.64838	1985	3	8.64838	1917	3	8.64838	1977	4	8.64838	1853	5	8.64838	2123	5	8.64838	2194	5	8.64838	2287	8	8.64838	2212	4	8.64838	1567	6	8.64838	1625	3
8.6606	2203	3	8.6606	2271	4	8.6606	1986	4	8.6606	1911	5	8.6606	1912	4	8.6606	1874	7	8.6606	2109	6	8.6606	2117	2	8.6606	2245	5	8.6606	2245	6	8.6606	1685	3	8.6606	1580	6
8.67281	2253	7	8.67281	2231	2	8.67281	1885	7	8.67281	1852	6	8.67281	1879	4	8.67281	1855	8	8.67281	2046	7	8.67281	2078	3	8.67281	2221	3	8.67281	2227	2	8.67281	1572	5	8.67281	1585	3
8.68503	2247	5	8.68503	2201	3	8.68503	1938	5	8.68503	1961	6	8.68503	1896	5	8.68503	1861	6	8.68503	2099	9	8.68503	2097	6	8.68503	2119	6	8.68503	2179	3	8.68503	1687	4	8.68503	1609	6
8.69724	2202	7	8.69724	2163	4	8.69724	1890	7	8.69724	1932	3	8.69724	1846	6	8.69724	1888	2	8.69724	2141	6	8.69724	2041	2	8.69724	2158	4	8.69724	2104	5	8.69724	1550	4	8.69724	1591	2
8.70946	2151	4	8.70946	2145	1	8.70946	1867	5	8.70946	1936	4	8.70946	1858	6	8.70946	1801	3	8.70946	2196	4	8.70946	2020	3	8.70946	2170	5	8.70946	2159	4	8.70946	1490	2	8.70946	1455	6
8.72167	2227	7	8.72167	2210	5	8.72167	1892	5	8.72167	1840	1	8.72167	1901	6	8.72167	1833	4	8.72167	2132	9	8.72167	2050	0	8.72167	2150	5	8.72167	2110	4	8.72167	1561	2	8.72167	1538	7
8.73389	2153	2	8.73389	2120	6	8.73389	1861	7	8.73389	1911	6	8.73389	1796	3	8.73389	1789	3	8.73389	2044	5	8.73389	2055	3	8.73389	2097	3	8.73389	2008	3	8.73389	1579	3	8.73389	1555	0
8.7461	2123	2	8.7461	2143	3	8.7461	1945	5	8.7461	1920	2	8.7461	1845	7	8.7461	1681	4	8.7461	2093	6	8.7461	2046	5	8.7461	2108	4	8.7461	1991	4	8.7461	1538	4	8.7461	1376	3
8.75832	2053	1	8.75832	2097	3	8.75832	1932	11	8.75832	1769	3	8.75832	1742	7	8.75832	1719	3	8.75832	2064	13	8.75832	2050	3	8.75832	2147	3	8.75832	2068	6	8.75832	1512	5	8.75832	1524	3
8.77053	2188	3	8.77053	2115	4	8.77053	1776	5	8.77053	1807	7	8.77053	1801	1	8.77053	1816	6	8.77053	2006	5	8.77053	2041	4	8.77053	2129	8	8.77053	2003	3	8.77053	1536	5	8.77053	1508	4
8.78275	2053	4	8.78275	2055	5	8.78275	1746	1	8.78275	1764	3	8.78275	1797	4	8.78275	1771	3	8.78275	2031	5	8.78275	2029	4	8.78275	2108	7	8.78275	2038	7	8.78275	1534	2	8.78275	1496	1
8.79496	2091	2	8.79496	2151	3	8.79496	1911	2	8.79496	1820	4	8.79496	1748	2	8.79496	1761	2	8.79496	1932	7	8.79496	2075	4	8.79496	2113	4	8.79496	2045	9	8.79496	1578	5	8.79496	1467	2
8.80718	2059	7	8.80718	2022	5	8.80718	1758	3	8.80718	1671	2	8.80718	1787	4	8.80718	1764	6	8.80718	1990	8	8.80718	2065	1	8.80718	2114	3	8.80718	2028	5	8.80718	1474	3	8.80718	1603	0
8.81939	2086	5	8.81939	2086	1	8.81939	1793	5	8.81939	1793	2	8.81939	1818	3	8.81939	1730	3	8.81939	1935	7	8.81939	2069	2	8.81939	2028	4	8.81939	2086	5	8.81939	1531	2	8.81939	1534	6
8.83161	2095	5	8.83161	2091	10	8.83161	1802	6	8.83161	1699	7	8.83161	1742	4	8.83161	1688	4	8.83161	1990	9	8.83161	2084	3	8.83161	2009	8	8.83161	2052	3	8.83161	1479	4	8.83161	1503	7
8.84382	2187	4	8.84382	2070	3	8.84382	1836	6	8.84382	1808	4	8.84382	1737	3	8.84382	1829	7	8.84382	2050	9	8.84382	2026	4	8.84382	2069	5	8.84382	2026	4	8.84382	1482	7	8.84382	1484	3
8.85604	2041	6	8.85604	2099	7	8.85604	1773	8	8.85604	1770	5	8.85604	1747	3	8.85604	1809	2	8.85604	1974	5	8.85604	1973	3	8.85604	1997	2	8.85604	2047	4	8.85604	1567	4	8.85604	1507	2
8.86826	2143	4	8.86826	2053	1	8.86826	1833	3	8.86826	1766	5	8.86826	1815	4	8.86826	1793	6	8.86826	2117	7	8.86826	1971	3	8.86826	2137	4	8.86826	2005	3	8.86826	1488	2	8.86826	1500	6
8.88047	2140	3	8.88047	2128	4	8.88047	1789	3	8.88047	1765	2	8.88047	1837	2	8.88047	1733	4	8.88047	1979	10	8.88047	2009	2	8.88047	2136	4	8.88047	2065	1	8.88047	1524	2	8.88047	1480	5
8.89269	2125	5	8.89269	2098	5	8.89269	1818	10	8.89269	1788	3	8.89269	1768	4	8.89269	1702	1	8.89269	2059	6	8.89269	2086	3	8.89269	2145	6	8.89269	2002	5	8.89269	1551	4	8.89269	1412	3
8.9049	2078	4	8.9049	2052	6	8.9049	1814	6	8.9049	1815	2	8.9049	1777	2	8.9049	1812	3	8.9049	1997	6	8.9049	2066	4	8.9049	2066	7	8.9049	2077	2	8.9049	1527	4	8.9049	1513	0
8.91712	2147	2	8.91712	1999	6	8.91712	1819	5	8.91712	1791	7	8.91712	1837	7	8.91712	1760	3	8.91712	1996	6	8.91712	2115	3	8.91712	2070	4	8.91712	2078	4	8.91712	1546	8	8.91712	1500	7
8.92933	2105	5	8.92933	2105	2	8.92933	1849	3	8.92933	1839	5	8.92933	1779	6	8.92933	1789	3	8.92933	1961	8	8.92933	1912	10	8.92933	2082	6	8.92933	2041	3	8.92933	1474	4	8.92933	1474	4
8.94155	2094	5	8.94155	2011	2	8.94155	1811	8	8.94155	1762	4	8.94155	1781	6	8.94155	1790	2	8.94155	2032	5	8.94155	2053	4	8.94155	2189	4	8.94155	1994	6	8.94155	1513	4	8.94155	1553	3
8.95376	2100	4	8.95376	2044	5	8.95376	1772	7	8.95376	1759	0	8.95376	1751	5	8.95376	1713	3	8.95376	2002	4	8.95376	2076	1	8.95376	2034	5	8.95376	2013	3	8.95376	1501	0	8.95376	1510	4
8.96598	2038	2	8.96598	2147	5	8.96598	1770	8	8.96598	1783	6	8.96598	1860	3	8.96598	1741	0	8.96598	2039	6	8.96598	1981	5	8.96598	2084	5	8.96598	2022	7	8.96598	1487	4	8.96598	1456	5
8.97819	2036	4	8.97819	2030	2	8.97819	1846	5	8.97819	1780	4	8.97819	1817	3	8.97819	1744	4	8.97819	2027	6	8.97819	2067	2	8.97819	2095	4	8.97819	1951	8	8.97819	1508	3	8.97819	1420	4
8.99041	2072	4	8.99041	2034	2	8.99041	1797	4	8.99041	1818	3	8.99041	1651	7	8.99041	1816	4	8.99041	1945	12	8.99041	2038	3	8.99041	2077	7	8.99041	2057	7	8.99041	1542	5	8.99041	1515	3
9.00262	2081	5	9.00262	1991	4	9.00262	1796	6	9.00262	1792	5	9.00262	1842	4	9.00262	1724	1	9.00262	1888	4	9.00262	1920	3	9.00262	2046	5	9.00262	2019	4	9.00262	1478	0	9.00262	1433	6
9.01484	2012	4	9.01484	1997	9	9.01484	1716	3	9.01484	1720	4	9.01484	1724	6	9.01484	1740	2	9.01484	1985	3	9.01484	2001	8	9.01484	1965	6	9.01484	2042	5	9.01484	1514	2	9.01484	1463	5
9.02705	2086	4	9.02705	2003	4	9.02705	1755	3	9.02705	1732	8	9.02705	1769	4	9.02705	1805	3	9.02705	1951	5	9.02705	1918	1	9.02705	1954	3	9.02705	2004	3	9.02705	1505	5	9.02705	1386	4
9.03927	1954	3	9.03927	1995	5	9.03927	1710	1	9.03927	1772	10	9.03927	1725	2	9.03927	1652	3	9.03927	1927	6	9.03927	1983	5	9.03927	1927	1	9.03927	1961	4	9.03927	1415	3	9.03927	1417	0
9.05148	1969	3	9.05148	1950	4	9.05148	1742	6	9.05148	1719	4	9.05148	1666	2	9.05148	1811	3	9.05148	1856	6	9.05148	1928	2	9.05148	1938	5	9.05148	2026	1	9.05148	1410	1	9.05148	1415	3
9.0637	1946	1	9.0637	2032	5	9.0637	1706	5	9.0637	1650	6	9.0637	1670	5	9.0637	1647	3	9.0637	1900	1	9.0637	1853	4	9.0637	1976	1	9.0637	1952	5	9.0637	1429	1	9.0637	1391	4
9.07591	1928	5	9.07591	1926	7	9.07591	1659	4	9.07591	1655	7	9.07591	1693	4	9.07591	1650	5	9.07591	1862	6	9.07591	1912	3	9.07591	1961	4	9.07591	1864	5	9.07591	1408	5	9.07591	1380	3
9.08813	1940	3	9.08813	1924	6	9.08813	1697	6	9.08813	1696	8	9.08813	1693	4	9.08813	1725	6	9.08813	1902	8	9.08813	1852	8	9.08813	1887	4	9.08813	1821	4	9.08813	1390	3	9.08813	1304	2
9.10034	1966	7	9.10034	1906	5	9.10034	1707	6	9.10034	1595	7	9.10034	1552	3	9.10034	1679	10	9.10034	1844	4	9.10034	1830	3	9.10034	1933	1	9.10034	1931	4	9.10034	1392	4	9.10034	1348	3
9.11256	1956	7	9.11256	1965	7	9.11256	1607	4	9.11256	1691	5	9.11256	1667	4	9.11256	1668	6	9.11256	1833	4	9.11256	1814	2	9.11256	1927	4	9.11256	1943	2	9.11256	1375	6	9.11256	1365	4
9.12478	1980	2	9.12478	1848	6	9.12478	1681	8	9.12478	1618	1	9.12478	1569	7	9.12478	1660	10	9.12478	1904	4	9.12478	1897	3	9.12478	1843	5	9.12478	1901	5	9.12478	1391	0	9.12478	1402	4
9.13699	1957	3	9.13699	1876	3	9.13699	1581	10	9.13699	1624	4	9.13699	1613	8	9.13699	1616	5	9.13699	1826	5	9.13699	1732	4	9.13699	1866	5	9.13699	1865	5	9.13699	1386	2	9.13699	1331	1
9.14921	1912	3	9.14921	1896	7	9.14921	1607	8	9.14921	1626	2	9.14921	1670	3	9.14921	1614	2	9.14921	1888	9	9.14921	1805	5	9.14921	1912	11	9.14921	1847	6	9.14921	1411	6	9.14921	1310	6
9.16142	1951	7	9.16142	1893	3	9.16142	1659	7	9.16142	1667	13	9.16142	1595	1	9.16142	1653	0	9.16142	1883	2	9.16142	1779	1	9.16142	1933	2	9.16142	1848	4	9.16142	1390	5	9.16142	1439	5
9.17364	1898	4	9.17364	1875	3	9.17364	1696	4	9.17364	1665	3	9.17364	1682	3	9.17364	1655	2	9.17364	1877	6	9.17364	1798	3	9.17364	1891	2	9.17364	1751	8	9.17364	1406	2	9.17364	1340	3
9.18585	1940	4	9.18585	1898	4	9.18585	1668	10	9.18585	1652	4	9.18585	1564	4	9.18585	1630	5	9.18585	1858	6	9.18585	1833	8	9.18585	1949	1	9.18585	1879	5	9.18585	1351	6	9.18585	1343	3
9.19807	1933	4	9.19807	1963	3	9.19807	1734	4	9.19807	1591	4	9.19807	1562	2	9.19807	1557	4	9.19807	1785	6	9.19807	1778	0	9.19807	1912	2	9.19807	1911	2	9.19807	1294	2	9.19807	1312	0
9.21028	2067	4	9.21028	1913	3	9.21028	1585	2	9.21028	1662	4	9.21028	1588	1	9.21028	1627	2	9.21028	1831	4	9.21028	1856	5	9.21028	1917	7	9.21028	1934	2	9.21028	1358	6	9.21028	1362	1
9.2225	1930	5	9.2225	1845	6	9.2225	1601	3	9.2225	1616	5	9.2225	1579	1	9.2225	1634	2	9.2225	1802	5	9.2225	1897	2	9.2225	1982	6	9.2225	1891	7	9.2225	1376	3	9.2225	1313	2
9.23471	1853	6	9.23471	1860	3	9.23471	1618	4	9.23471	1645	3	9.23471	1688	8	9.23471	1620	3	9.23471	1878	4	9.23471	1788	4	9.23471	1853	1	9.23471	1878	6	9.23471	1347	5	9.23471	1364	3
9.24693	1905	5	9.24693	1844	6	9.24693	1650	6	9.24693	1644	2	9.24693	1671	3	9.24693	1655	5	9.24693	1813	8	9.24693	1892	3	9.24693	1874	4	9.24693	1771	6	9.24693	1371	3	9.24693	1364	3
9.25914	1937	5	9.25914	1955	3	9.25914	1694	6	9.25914	1693	5	9.25914	1596	3	9.25914	1592	4	9.25914	1835	11	9.25914	1810	5	9.25914	1872	3	9.25914	1841	2	9.25914	1336	0	9.25914	1369	2
9.27136	1905	6	9.27136	1854	3	9.27136	1568	6	9.27136	1610	6	9.27136	1596	2	9.27136	1563	2	9.27136	1765	6	9.27136	1873	1	9.27136	1861	5	9.27136	1824	3	9.27136	1368	1	9.27136	1291	3
9.28357	1877	5	9.28357	1837	2	9.28357	1637	4	9.28357	1570	3	9.28357	1626	4	9.28357	1619	1	9.28357	1834	7	9.28357	1807	4	9.28357	1897	9	9.28357	1869	2	9.28357	1275	5	9.28357	1348	3
9.29579	1865	4	9.29579	1839	2	9.29579	1601	3	9.29579	1668	10	9.29579	1575	0	9.29579	1614	6	9.29579	1760	6	9.29579	1792	0	9.29579	1781	7	9.29579	1785	4	9.29579	1377	10	9.29579	1364	2
9.308	1827	4	9.308	1754	6	9.308	1564	2	9.308	1641	3	9.308	1558	2	9.308	1533	3	9.308	1764	9	9.308	1718	2	9.308	1805	2	9.308	1875	3	9.308	1392	3	9.308	1349	3
9.32022	1901	6	9.32022	1850	4	9.32022	1657	5	9.32022	1571	6	9.32022	1563	3	9.32022	1551	4	9.32022	1773	5	9.32022	1784	4	9.32022	1821	3	9.32022	1851	4	9.32022	1253	2	9.32022	1301	7
9.33243	1830	2	9.33243	1764	2	9.33243	1573	7	9.33243	1543	4	9.33243	1499	6	9.33243	1577	5	9.33243	1752	3	9.33243	1813	3	9.33243	1798	2	9.33243	1767	3	9.33243	1249	5	9.33243	1254	4
9.34465	1874	4	9.34465	1820	5	9.34465	1586	3	9.34465	1585	1	9.34465	1579	2	9.34465	1583	5	9.34465	1806	6	9.34465	1821	3	9.34465	1764	4	9.34465	1728	4	9.34465	1282	7	9.34465	1245	5
9.35686	1815	3	9.35686	1739	1	9.35686	1623	5	9.35686	1524	3	9.35686	1576	5	9.35686	1516	3	9.35686	1725	8	9.35686	1810	3	9.35686	1823	5	9.35686	1795	6	9.35686	1339	6	9.35686	1212	1
9.36908	1793	4	9.36908	1769	4	9.36908	1541	2	9.36908	1535	3	9.36908	1588	3	9.36908	1585	2	9.36908	1674	9	9.36908	1765	1	9.36908	1793	3	9.36908	1758	5	9.36908	1299	4	9.36908	1302	3
9.38129	1827	2	9.38129	1841	4	9.38129	1536	3	9.38129	1545	3	9.38129	1470	9	9.38129	1536	5	9.38129	1709	10	9.38129	1700	2	9.38129	1764	0	9.38129	1688	3	9.38129	1276	3	9.38129	1258	8
9.39351	1725	3	9.39351	1757	0	9.39351	1529	9	9.39351	1503	3	9.39351	1501	4	9.39351	1553	0	9.39351	1731	6	9.39351	1727	3	9.39351	1876	3	9.39351	1714	2	9.39351	1299	2	9.39351	1216	4
9.40573	1844	2	9.40573	1730	4	9.40573	1575	6	9.40573	1562	5	9.40573	1444	6	9.40573	1486	1	9.40573	1754	4	9.40573	1664	4	9.40573	1634	4	9.40573	1756	7	9.40573	1269	1	9.40573	1218	2
9.41794	1791	4	9.41794	1765	0	9.41794	1471	3	9.41794	1504	2	9.41794	1437	1	9.41794	1437	2	9.41794	1628	9	9.41794	1675	4	9.41794	1782	3	9.41794	1740	3	9.41794	1256	2	9.41794	1235	1
9.43016	1819	1	9.43016	1773	5	9.43016	1466	3	9.43016	1524	3	9.43016	1489	2	9.43016	1526	1	9.43016	1715	7	9.43016	1645	3	9.43016	1738	1	9.43016	1685	2	9.43016	1270	4	9.43016	1202	6
9.44237	1714	3	9.44237	1796	2	9.44237	1600	5	9.44237	1484	4	9.44237	1463	3	9.44237	1474	3	9.44237	1641	5	9.44237	1674	1	9.44237	1787	2	9.44237	1689	5	9.44237	1186	3	9.44237	1207	4
9.45459	1722	3	9.45459	1691	2	9.45459	1573	2	9.45459	1522	3	9.45459	1541	2	9.45459	1473	4	9.45459	1785	4	9.45459	1688	6	9.45459	1733	3	9.45459	1689	8	9.45459	1204	4	9.45459	1175	2
9.4668	1761	1	9.4668	1753	2	9.4668	1517	6	9.4668	1563	3	9.4668	1517	3	9.4668	1531	3	9.4668	1704	10	9.4668	1716	3	9.4668	1748	2	9.4668	1719	6	9.4668	1325	5	9.4668	1240	3
9.47902	1767	8	9.47902	1781	1	9.47902	1526	5	9.47902	1553	7	9.47902	1451	3	9.47902	1466	1	9.47902	1726	3	9.47902	1699	2	9.47902	1786	6	9.47902	1689	4	9.47902	1245	5	9.47902	1237	4
9.49123	1823	5	9.49123	1786	4	9.49123	1467	6	9.49123	1517	2	9.49123	1511	2	9.49123	1485	1	9.49123	1678	6	9.49123	1702	7	9.49123	1819	5	9.49123	1710	2	9.49123	1195	7	9.49123	1247	3
9.50345	1729	3	9.50345	1793	6	9.50345	1540	4	9.50345	1489	2	9.50345	1489	1	9.50345	1512	5	9.50345	1631	4	9.50345	1735	0	9.50345	1769	6	9.50345	1726	6	9.50345	1279	4	9.50345	1243	3
9.51566	1773	1	9.51566	1761	5	9.51566	1487	5	9.51566	1495	10	9.51566	1557	2	9.51566	1487	3	9.51566	1733	8	9.51566	1762	2	9.51566	1790	6	9.51566	1633	4	9.51566	1205	3	9.51566	1276	2
9.52788	1741	3	9.52788	1813	1	9.52788	1551	1	9.52788	1524	1	9.52788	1578	1	9.52788	1521	3	9.52788	1661	5	9.52788	1712	1	9.52788	1748	4	9.52788	1688	5	9.52788	1315	3	9.52788	1288	4
9.54009	1787	3	9.54009	1778	6	9.54009	1480	5	9.54009	1503	3	9.54009	1543	6	9.54009	1505	3	9.54009	1710	6	9.54009	1881	2	9.54009	1792	5	9.54009	1692	1	9.54009	1243	4	9.54009	1252	2
9.55231	1763	5	9.55231	1716	6	9.55231	1451	6	9.55231	1421	4	9.55231	1531	2	9.55231	1427	3	9.55231	1697	8	9.55231	1612	9	9.55231	1816	5	9.55231	1726	6	9.55231	1202	2	9.55231	1175	4
9.56452	1776	5	9.56452	1802	4	9.56452	1521	4	9.56452	1470	3	9.56452	1478	6	9.56452	1559	2	9.56452	1678	5	9.56452	1718	2	9.56452	1795	3	9.56452	1667	6	9.56452	1196	1	9.56452	1250	7
9.57674	1767	4	9.57674	1734	5	9.57674	1460	5	9.57674	1503	0	9.57674	1529	3	9.57674	1426	1	9.57674	1727	5	9.57674	1725	2	9.57674	1669	9	9.57674	1595	1	9.57674	1274	3	9.57674	1243	4
9.58895	1767	7	9.58895	1668	6	9.58895	1539	3	9.58895	1410	6	9.58895	1536	1	9.58895	1457	5	9.58895	1677	6	9.58895	1761	3	9.58895	1708	4	9.58895	1694	4	9.58895	1298	5	9.58895	1213	5
9.60117	1793	3	9.60117	1700	2	9.60117	1489	3	9.60117	1446	2	9.60117	1465	7	9.60117	1497	1	9.60117	1592	6	9.60117	1661	2	9.60117	1695	5	9.60117	1695	7	9.60117	1197	1	9.60117	1193	1
9.61338	1727	4	9.61338	1697	2	9.61338	1531	2	9.61338	1521	3	9.61338	1486	6	9.61338	1452	2	9.61338	1573	5	9.61338	1670	6	9.61338	1744	2	9.61338	1649	3	9.61338	1266	5	9.61338	1193	3
9.6256	1719	2	9.6256	1684	2	9.6256	1451	8	9.6256	1415	3	9.6256	1514	2	9.6256	1463	1	9.6256	1646	10	9.6256	1704	2	9.6256	1682	2	9.6256	1668	3	9.6256	1211	3	9.6256	1185	5
9.63781	1778	5	9.63781	1671	4	9.63781	1453	5	9.63781	1406	7	9.63781	1468	5	9.63781	1481	3	9.63781	1654	2	9.63781	1723	5	9.63781	1636	4	9.63781	1632	1	9.63781	1170	5	9.63781	1139	5
9.65003	1636	2	9.65003	1750	1	9.65003	1476	5	9.65003	1360	10	9.65003	1467	3	9.65003	1480	3	9.65003	1645	6	9.65003	1602	3	9.65003	1706	5	9.65003	1535	2	9.65003	1209	2	9.65003	1107	3
9.66225	1709	3	9.66225	1602	3	9.66225	1415	3	9.66225	1464	3	9.66225	1448	3	9.66225	1436	2	9.66225	1619	9	9.66225	1640	2	9.66225	1689	7	9.66225	1632	3	9.66225	1175	2	9.66225	1164	2
9.67446	1716	4	9.67446	1719	3	9.67446	1444	3	9.67446	1452	2	9.67446	1477	2	9.67446	1451	1	9.67446	1590	4	9.67446	1542	4	9.67446	1682	2	9.67446	1650	1	9.67446	1122	2	9.67446	1129	5
9.68668	1713	5	9.68668	1700	5	9.68668	1376	4	9.68668	1448	1	9.68668	1417	4	9.68668	1437	6	9.68668	1586	7	9.68668	1585	5	9.68668	1665	2	9.68668	1606	3	9.68668	1147	3	9.68668	1102	0
9.69889	1676	0	9.69889	1624	4	9.69889	1407	4	9.69889	1411	6	9.69889	1395	3	9.69889	1395	3	9.69889	1596	9	9.69889	1651	3	9.69889	1689	2	9.69889	1609	6	9.69889	1188	5	9.69889	1185	3
9.71111	1671	2	9.71111	1655	1	9.71111	1413	9	9.71111	1377	6	9.71111	1411	2	9.71111	1446	1	9.71111	1560	7	9.71111	1594	2	9.71111	1630	4	9.71111	1648	4	9.71111	1141	4	9.71111	1086	4
9.72332	1578	3	9.72332	1702	7	9.72332	1395	2	9.72332	1349	2	9.72332	1449	5	9.72332	1400	2	9.72332	1552	5	9.72332	1592	5	9.72332	1674	3	9.72332	1591	6	9.72332	1086	5	9.72332	1102	3
9.73554	1687	3	9.73554	1617	8	9.73554	1461	6	9.73554	1335	2	9.73554	1423	2	9.73554	1441	1	9.73554	1614	5	9.73554	1539	5	9.73554	1648	5	9.73554	1582	6	9.73554	1165	3	9.73554	1127	2
9.74775	1596	3	9.74775	1581	3	9.74775	1377	4	9.74775	1423	3	9.74775	1447	2	9.74775	1417	2	9.74775	1531	4	9.74775	1540	4	9.74775	1580	5	9.74775	1620	3	9.74775	1128	7	9.74775	1125	8
9.75997	1648	2	9.75997	1634	3	9.75997	1467	4	9.75997	1399	3	9.75997	1448	1	9.75997	1486	1	9.75997	1557	3	9.75997	1590	7	9.75997	1659	5	9.75997	1592	5	9.75997	1203	3	9.75997	1106	5
9.77218	1678	7	9.77218	1532	6	9.77218	1445	6	9.77218	1374	4	9.77218	1432	4	9.77218	1332	3	9.77218	1558	6	9.77218	1505	5	9.77218	1664	7	9.77218	1536	2	9.77218	1078	4	9.77218	1112	4
9.7844	1638	3	9.7844	1614	6	9.7844	1387	8	9.7844	1364	1	9.7844	1329	1	9.7844	1383	2	9.7844	1548	5	9.7844	1535	5	9.7844	1592	4	9.7844	1566	4	9.7844	1191	2	9.7844	1078	6
9.79661	1664	6	9.79661	1555	2	9.79661	1396	2	9.79661	1380	6	9.79661	1371	2	9.79661	1389	4	9.79661	1617	4	9.79661	1560	6	9.79661	1616	2	9.79661	1557	4	9.79661	1141	6	9.79661	1116	4
9.80883	1564	1	9.80883	1566	10	9.80883	1382	3	9.80883	1366	9	9.80883	1375	3	9.80883	1375	1	9.80883	1538	4	9.80883	1649	0	9.80883	1533	3	9.80883	1516	4	9.80883	1172	2	9.80883	1131	3
9.82104	1707	5	9.82104	1573	3	9.82104	1373	2	9.82104	1336	6	9.82104	1366	0	9.82104	1334	5	9.82104	1478	5	9.82104	1570	1	9.82104	1540	4	9.82104	1483	2	9.82104	1115	1	9.82104	1083	9
9.83326	1569	3	9.83326	1578	1	9.83326	1419	0	9.83326	1381	8	9.83326	1351	2	9.83326	1342	2	9.83326	1548	4	9.83326	1575	3	9.83326	1573	5	9.83326	1516	3	9.83326	1138	2	9.83326	1116	4
9.84547	1615	7	9.84547	1603	4	9.84547	1360	4	9.84547	1408	6	9.84547	1332	4	9.84547	1403	2	9.84547	1509	4	9.84547	1529	7	9.84547	1482	3	9.84547	1516	3	9.84547	1134	4	9.84547	1081	3
9.85769	1570	2	9.85769	1513	4	9.85769	1386	6	9.85769	1400	3	9.85769	1360	1	9.85769	1289	6	9.85769	1586	7	9.85769	1532	3	9.85769	1585	3	9.85769	1544	3	9.85769	1115	1	9.85769	1109	0
9.8699	1576	5	9.8699	1607	1	9.8699	1446	4	9.8699	1335	3	9.8699	1368	2	9.8699	1376	1	9.8699	1512	8	9.8699	1528	4	9.8699	1582	4	9.8699	1494	5	9.8699	1067	3	9.8699	1125	3
9.88212	1570	3	9.88212	1514	2	9.88212	1258	2	9.88212	1381	5	9.88212	1454	4	9.88212	1362	6	9.88212	1492	6	9.88212	1547	2	9.88212	1520	4	9.88212	1552	4	9.88212	1105	6	9.88212	1080	2
9.89433	1617	4	9.89433	1530	3	9.89433	1343	6	9.89433	1279	6	9.89433	1376	3	9.89433	1297	6	9.89433	1524	8	9.89433	1481	1	9.89433	1570	5	9.89433	1481	5	9.89433	1081	4	9.89433	1108	3
9.90655	1491	5	9.90655	1518	1	9.90655	1384	3	9.90655	1336	2	9.90655	1438	4	9.90655	1225	3	9.90655	1514	9	9.90655	1539	3	9.90655	1552	7	9.90655	1469	5	9.90655	1111	5	9.90655	1064	6
9.91876	1538	7	9.91876	1576	6	9.91876	1380	3	9.91876	1277	6	9.91876	1321	6	9.91876	1288	3	9.91876	1521	7	9.91876	1490	4	9.91876	1511	4	9.91876	1457	0	9.91876	1092	6	9.91876	1082	2
9.93098	1533	3	9.93098	1544	1	9.93098	1353	5	9.93098	1296	4	9.93098	1252	3	9.93098	1298	2	9.93098	1398	3	9.93098	1532	5	9.93098	1474	4	9.93098	1413	2	9.93098	1047	3	9.93098	1107	3
9.9432	1535	5	9.9432	1588	4	9.9432	1339	5	9.9432	1244	2	9.9432	1336	2	9.9432	1340	1	9.9432	1458	2	9.9432	1521	3	9.9432	1457	2	9.9432	1432	1	9.9432	1081	3	9.9432	1034	4
9.95541	1514	1	9.95541	1526	2	9.95541	1288	6	9.95541	1225	5	9.95541	1317	2	9.95541	1287	2	9.95541	1445	3	9.95541	1476	11	9.95541	1503	5	9.95541	1467	3	9.95541	1057	8	9.95541	1018	0
9.96763	1490	6	9.96763	1478	2	9.96763	1307	3	9.96763	1268	1	9.96763	1302	2	9.96763	1242	5	9.96763	1508	9	9.96763	1505	3	9.96763	1444	7	9.96763	1469	3	9.96763	1069	3	9.96763	1047	5
9.97984	1511	2	9.97984	1552	1	9.97984	1322	5	9.97984	1244	3	9.97984	1312	3	9.97984	1294	2	9.97984	1449	4	9.97984	1425	1	9.97984	1511	0	9.97984	1458	5	9.97984	1037	1	9.97984	1081	1
9.99206	1507	4	9.99206	1545	0	9.99206	1214	6	9.99206	1247	1	9.99206	1223	3	9.99206	1227	2	9.99206	1415	9	9.99206	1423	3	9.99206	1499	3	9.99206	1479	8	9.99206	1062	5	9.99206	998	4
10.0043	1430	7	10.0043	1530	2	10.0043	1288	2	10.0043	1323	7	10.0043	1299	1	10.0043	1316	1	10.0043	1489	5	10.0043	1427	5	10.0043	1481	4	10.0043	1476	3	10.0043	1056	5	10.0043	1045	3
10.0165	1428	2	10.0165	1461	3	10.0165	1275	5	10.0165	1271	6	10.0165	1353	0	10.0165	1242	2	10.0165	1463	8	10.0165	1414	4	10.0165	1403	4	10.0165	1448	9	10.0165	968	5	10.0165	991	4
10.0287	1447	6	10.0287	1457	2	10.0287	1300	6	10.0287	1251	7	10.0287	1281	1	10.0287	1326	4	10.0287	1413	5	10.0287	1426	3	10.0287	1487	4	10.0287	1443	4	10.0287	1077	6	10.0287	1040	2
10.0409	1543	3	10.0409	1390	5	10.0409	1303	9	10.0409	1278	4	10.0409	1201	2	10.0409	1231	2	10.0409	1398	4	10.0409	1454	3	10.0409	1489	1	10.0409	1399	4	10.0409	1066	0	10.0409	1000	3
10.0531	1489	3	10.0531	1447	3	10.0531	1263	6	10.0531	1287	8	10.0531	1242	2	10.0531	1235	3	10.0531	1436	3	10.0531	1447	2	10.0531	1497	3	10.0531	1348	0	10.0531	1018	2	10.0531	1023	0
10.0654	1496	4	10.0654	1423	2	10.0654	1292	8	10.0654	1288	7	10.0654	1273	3	10.0654	1252	2	10.0654	1389	4	10.0654	1438	0	10.0654	1398	1	10.0654	1333	1	10.0654	951	2	10.0654	1024	4
10.0776	1485	4	10.0776	1464	5	10.0776	1334	7	10.0776	1295	5	10.0776	1221	2	10.0776	1277	8	10.0776	1445	5	10.0776	1453	1	10.0776	1455	4	10.0776	1369	5	10.0776	1031	5	10.0776	1034	1
10.0898	1498	2	10.0898	1393	4	10.0898	1247	2	10.0898	1221	4	10.0898	1255	2	10.0898	1240	2	10.0898	1413	7	10.0898	1487	5	10.0898	1422	3	10.0898	1374	6	10.0898	1026	2	10.0898	980	7
10.102	1511	2	10.102	1416	2	10.102	1260	4	10.102	1248	3	10.102	1233	2	10.102	1195	1	10.102	1410	2	10.102	1365	2	10.102	1473	4	10.102	1365	2	10.102	1089	3	10.102	959	2
10.1142	1555	2	10.1142	1383	2	10.1142	1258	4	10.1142	1312	0	10.1142	1273	2	10.1142	1264	1	10.1142	1317	6	10.1142	1410	3	10.1142	1517	4	10.1142	1391	1	10.1142	1050	3	10.1142	985	2
10.1264	1525	5	10.1264	1459	0	10.1264	1242	4	10.1264	1224	8	10.1264	1222	3	10.1264	1260	3	10.1264	1417	4	10.1264	1515	3	10.1264	1508	3	10.1264	1461	3	10.1264	1022	2	10.1264	1008	0
10.1386	1482	5	10.1386	1392	3	10.1386	1282	5	10.1386	1317	3	10.1386	1283	3	10.1386	1232	2	10.1386	1381	7	10.1386	1379	1	10.1386	1451	3	10.1386	1400	3	10.1386	1060	7	10.1386	1020	2
10.1509	1539	2	10.1509	1428	4	10.1509	1265	6	10.1509	1222	4	10.1509	1210	7	10.1509	1259	2	10.1509	1423	6	10.1509	1438	2	10.1509	1463	5	10.1509	1407	4	10.1509	966	4	10.1509	1046	4
10.1631	1474	4	10.1631	1439	3	10.1631	1286	3	10.1631	1242	1	10.1631	1289	3	10.1631	1304	3	10.1631	1402	8	10.1631	1421	5	10.1631	1410	2	10.1631	1387	7	10.1631	1024	1	10.1631	1032	4
10.1753	1416	7	10.1753	1485	5	10.1753	1261	9	10.1753	1235	3	10.1753	1257	4	10.1753	1332	4	10.1753	1386	7	10.1753	1484	2	10.1753	1430	3	10.1753	1386	3	10.1753	1002	5	10.1753	985	2
10.1875	1476	7	10.1875	1497	1	10.1875	1297	6	10.1875	1187	4	10.1875	1222	3	10.1875	1258	2	10.1875	1381	5	10.1875	1489	3	10.1875	1502	4	10.1875	1429	3	10.1875	1029	4	10.1875	993	6
10.1997	1459	2	10.1997	1407	4	10.1997	1263	2	10.1997	1281	1	10.1997	1245	2	10.1997	1300	2	10.1997	1437	2	10.1997	1465	1	10.1997	1423	2	10.1997	1399	6	10.1997	1017	4	10.1997	1010	2
10.2119	1539	5	10.2119	1441	4	10.2119	1271	2	10.2119	1228	2	10.2119	1259	5	10.2119	1225	3	10.2119	1346	10	10.2119	1380	6	10.2119	1420	2	10.2119	1365	4	10.2119	1033	4	10.2119	1016	4
10.2241	1468	3	10.2241	1445	2	10.2241	1242	4	10.2241	1260	3	10.2241	1233	2	10.2241	1274	4	10.2241	1357	3	10.2241	1437	3	10.2241	1473	5	10.2241	1330	2	10.2241	1010	3	10.2241	1004	5
10.2364	1460	4	10.2364	1390	4	10.2364	1256	7	10.2364	1211	5	10.2364	1221	2	10.2364	1258	0	10.2364	1402	5	10.2364	1369	5	10.2364	1360	2	10.2364	1410	2	10.2364	997	1	10.2364	1008	6
10.2486	1430	1	10.2486	1313	2	10.2486	1226	3	10.2486	1237	3	10.2486	1277	0	10.2486	1197	1	10.2486	1351	8	10.2486	1389	2	10.2486	1366	2	10.2486	1320	2	10.2486	1023	5	10.2486	935	4
10.2608	1442	2	10.2608	1380	4	10.2608	1186	5	10.2608	1229	2	10.2608	1196	3	10.2608	1212	2	10.2608	1312	9	10.2608	1408	3	10.2608	1461	7	10.2608	1379	3	10.2608	1016	4	10.2608	970	4
10.273	1437	5	10.273	1375	6	10.273	1241	7	10.273	1206	5	10.273	1264	3	10.273	1264	3	10.273	1327	3	10.273	1442	1	10.273	1407	7	10.273	1321	1	10.273	977	1	10.273	981	0
10.2852	1449	4	10.2852	1390	3	10.2852	1195	5	10.2852	1225	2	10.2852	1185	4	10.2852	1194	2	10.2852	1430	6	10.2852	1366	4	10.2852	1387	4	10.2852	1439	4	10.2852	979	1	10.2852	916	1
10.2974	1387	3	10.2974	1404	5	10.2974	1161	5	10.2974	1129	4	10.2974	1249	5	10.2974	1204	6	10.2974	1376	7	10.2974	1378	2	10.2974	1364	2	10.2974	1348	3	10.2974	972	0	10.2974	915	2
10.3096	1390	1	10.3096	1377	4	10.3096	1210	2	10.3096	1210	3	10.3096	1181	4	10.3096	1186	2	10.3096	1341	7	10.3096	1419	5	10.3096	1405	4	10.3096	1297	1	10.3096	914	5	10.3096	912	6
10.3219	1382	3	10.3219	1410	1	10.3219	1155	9	10.3219	1166	3	10.3219	1176	3	10.3219	1215	4	10.3219	1291	10	10.3219	1360	2	10.3219	1291	3	10.3219	1349	3	10.3219	944	4	10.3219	942	2
10.3341	1379	4	10.3341	1436	2	10.3341	1153	5	10.3341	1158	1	10.3341	1182	4	10.3341	1175	3	10.3341	1298	2	10.3341	1316	1	10.3341	1404	7	10.3341	1317	5	10.3341	956	6	10.3341	914	5
10.3463	1447	3	10.3463	1412	3	10.3463	1154	4	10.3463	1207	3	10.3463	1156	3	10.3463	1183	2	10.3463	1288	5	10.3463	1325	0	10.3463	1349	6	10.3463	1283	4	10.3463	897	4	10.3463	937	2
10.3585	1333	5	10.3585	1332	2	10.3585	1169	3	10.3585	1126	2	10.3585	1185	4	10.3585	1118	5	10.3585	1358	2	10.3585	1330	3	10.3585	1354	3	10.3585	1259	1	10.3585	955	1	10.3585	896	5
10.3707	1338	3	10.3707	1382	4	10.3707	1154	4	10.3707	1156	4	10.3707	1176	1	10.3707	1208	3	10.3707	1384	9	10.3707	1291	3	10.3707	1339	3	10.3707	1290	2	10.3707	905	4	10.3707	853	2
10.3829	1345	1	10.3829	1357	2	10.3829	1168	4	10.3829	1171	3	10.3829	1159	1	10.3829	1175	1	10.3829	1301	7	10.3829	1323	2	10.3829	1336	2	10.3829	1283	4	10.3829	955	2	10.3829	952	6
10.3952	1408	2	10.3952	1319	1	10.3952	1170	1	10.3952	1221	2	10.3952	1162	3	10.3952	1134	1	10.3952	1293	4	10.3952	1311	3	10.3952	1318	6	10.3952	1348	5	10.3952	923	5	10.3952	937	3
10.4074	1376	4	10.4074	1326	1	10.4074	1183	5	10.4074	1194	3	10.4074	1109	1	10.4074	1150	3	10.4074	1312	7	10.4074	1331	1	10.4074	1330	3	10.4074	1304	1	10.4074	967	4	10.4074	902	2
10.4196	1379	3	10.4196	1358	2	10.4196	1153	5	10.4196	1195	2	10.4196	1120	1	10.4196	1135	2	10.4196	1275	4	10.4196	1328	2	10.4196	1340	3	10.4196	1306	3	10.4196	919	4	10.4196	891	7
10.4318	1384	4	10.4318	1352	5	10.4318	1066	5	10.4318	1106	4	10.4318	1203	2	10.4318	1160	2	10.4318	1336	6	10.4318	1289	3	10.4318	1312	4	10.4318	1228	4	10.4318	950	8	10.4318	865	1
10.444	1352	1	10.444	1326	0	10.444	1195	5	10.444	1156	2	10.444	1160	4	10.444	1129	2	10.444	1218	7	10.444	1292	1	10.444	1363	3	10.444	1307	3	10.444	905	4	10.444	978	1
10.4562	1361	3	10.4562	1354	5	10.4562	1135	2	10.4562	1082	5	10.4562	1178	3	10.4562	1180	3	10.4562	1259	2	10.4562	1266	4	10.4562	1323	2	10.4562	1239	4	10.4562	937	2	10.4562	920	5
10.4685	1351	0	10.4685	1350	1	10.4685	1113	4	10.4685	1113	4	10.4685	1209	4	10.4685	1136	3	10.4685	1304	6	10.4685	1251	4	10.4685	1296	4	10.4685	1332	4	10.4685	927	1	10.4685	921	5
10.4807	1374	3	10.4807	1303	2	10.4807	1080	4	10.4807	1118	3	10.4807	1167	5	10.4807	1161	4	10.4807	1276	5	10.4807	1340	4	10.4807	1328	3	10.4807	1286	1	10.4807	885	3	10.4807	887	3
10.4929	1367	2	10.4929	1312	6	10.4929	1074	4	10.4929	1137	4	10.4929	1151	1	10.4929	1127	1	10.4929	1276	4	10.4929	1246	7	10.4929	1238	7	10.4929	1350	3	10.4929	933	4	10.4929	923	2
10.5051	1264	0	10.5051	1315	3	10.5051	1104	6	10.5051	1086	2	10.5051	1165	3	10.5051	1109	1	10.5051	1321	2	10.5051	1301	2	10.5051	1285	2	10.5051	1309	3	10.5051	903	2	10.5051	858	2
10.5173	1315	2	10.5173	1231	3	10.5173	1144	8	10.5173	1099	4	10.5173	1119	4	10.5173	1080	3	10.5173	1292	2	10.5173	1234	3	10.5173	1314	3	10.5173	1255	5	10.5173	965	2	10.5173	846	3
10.5295	1302	4	10.5295	1344	2	10.5295	1120	5	10.5295	1072	3	10.5295	1161	5	10.5295	1098	5	10.5295	1298	4	10.5295	1250	7	10.5295	1255	4	10.5295	1236	1	10.5295	861	0	10.5295	889	3
10.5417	1274	4	10.5417	1241	3	10.5417	1124	2	10.5417	1098	5	10.5417	1112	2	10.5417	1096	1	10.5417	1155	10	10.5417	1206	2	10.5417	1331	2	10.5417	1282	5	10.5417	924	2	10.5417	866	2
10.554	1302	3	10.554	1288	3	10.554	1152	3	10.554	1103	2	10.554	1094	4	10.554	1067	6	10.554	1273	6	10.554	1282	1	10.554	1284	1	10.554	1249	3	10.554	879	7	10.554	888	5
10.5662	1234	9	10.5662	1313	2	10.5662	1133	3	10.5662	1046	3	10.5662	1076	4	10.5662	1147	0	10.5662	1215	10	10.5662	1279	4	10.5662	1247	1	10.5662	1179	3	10.5662	869	3	10.5662	892	2
10.5784	1310	4	10.5784	1243	4	10.5784	1152	5	10.5784	1095	5	10.5784	1094	2	10.5784	1085	2	10.5784	1252	8	10.5784	1188	3	10.5784	1286	4	10.5784	1229	3	10.5784	892	6	10.5784	868	1
10.5906	1333	6	10.5906	1285	5	10.5906	1132	6	10.5906	1071	2	10.5906	1126	1	10.5906	1088	4	10.5906	1209	12	10.5906	1252	3	10.5906	1212	2	10.5906	1307	1	10.5906	886	2	10.5906	860	1
10.6028	1277	3	10.6028	1271	6	10.6028	1066	4	10.6028	1067	3	10.6028	1132	1	10.6028	1153	0	10.6028	1205	3	10.6028	1273	1	10.6028	1252	3	10.6028	1237	4	10.6028	860	2	10.6028	876	2
10.615	1334	7	10.615	1265	1	10.615	1084	3	10.615	1069	2	10.615	1066	3	10.615	1073	3	10.615	1244	13	10.615	1264	6	10.615	1209	4	10.615	1212	1	10.615	901	3	10.615	901	3
10.6273	1250	5	10.6273	1250	1	10.6273	1062	5	10.6273	1078	4	10.6273	1108	2	10.6273	1070	4	10.6273	1302	4	10.6273	1146	2	10.6273	1288	2	10.6273	1215	0	10.6273	861	4	10.6273	902	5
10.6395	1271	3	10.6395	1244	1	10.6395	1112	4	10.6395	1078	7	10.6395	1062	1	10.6395	1088	3	10.6395	1193	3	10.6395	1265	2	10.6395	1221	1	10.6395	1249	2	10.6395	861	3	10.6395	893	2
10.6517	1308	3	10.6517	1260	2	10.6517	1113	2	10.6517	1003	7	10.6517	1139	1	10.6517	1133	4	10.6517	1233	2	10.6517	1220	2	10.6517	1211	4	10.6517	1213	3	10.6517	871	1	10.6517	931	5
10.6639	1277	2	10.6639	1285	5	10.6639	1111	4	10.6639	1070	5	10.6639	1113	3	10.6639	1105	2	10.6639	1224	3	10.6639	1239	2	10.6639	1249	4	10.6639	1191	2	10.6639	941	2	10.6639	871	0
10.6761	1271	6	10.6761	1172	2	10.6761	1059	1	10.6761	1048	4	10.6761	1096	2	10.6761	1036	2	10.6761	1198	6	10.6761	1216	4	10.6761	1267	2	10.6761	1221	2	10.6761	830	3	10.6761	871	2
10.6883	1228	3	10.6883	1290	1	10.6883	1094	4	10.6883	1141	3	10.6883	1049	1	10.6883	1060	5	10.6883	1260	8	10.6883	1215	2	10.6883	1226	2	10.6883	1195	3	10.6883	866	1	10.6883	882	4
10.7005	1271	3	10.7005	1186	3	10.7005	1030	2	10.7005	1120	7	10.7005	1086	4	10.7005	1061	2	10.7005	1266	5	10.7005	1150	6	10.7005	1204	1	10.7005	1240	1	10.7005	876	4	10.7005	868	1
10.7127	1279	4	10.7127	1265	5	10.7127	1041	4	10.7127	1060	9	10.7127	1117	3	10.7127	1031	2	10.7127	1243	6	10.7127	1190	3	10.7127	1211	9	10.7127	1184	2	10.7127	902	6	10.7127	854	1
10.725	1256	3	10.725	1270	4	10.725	1122	3	10.725	1088	7	10.725	1100	1	10.725	1120	2	10.725	1155	7	10.725	1233	1	10.725	1226	4	10.725	1265	4	10.725	869	3	10.725	841	1
10.7372	1308	5	10.7372	1247	3	10.7372	1053	4	10.7372	1080	4	10.7372	1079	0	10.7372	1062	2	10.7372	1231	3	10.7372	1243	4	10.7372	1240	3	10.7372	1167	1	10.7372	846	4	10.7372	835	1
10.7494	1242	6	10.7494	1244	3	10.7494	1098	5	10.7494	1026	6	10.7494	1123	2	10.7494	1046	2	10.7494	1173	6	10.7494	1175	4	10.7494	1195	1	10.7494	1169	1	10.7494	909	2	10.7494	847	3
10.7616	1286	7	10.7616	1253	4	10.7616	1110	2	10.7616	1078	5	10.7616	1031	3	10.7616	1084	2	10.7616	1239	4	10.7616	1222	4	10.7616	1238	5	10.7616	1209	5	10.7616	857	6	10.7616	867	2
10.7738	1286	7	10.7738	1197	4	10.7738	1088	7	10.7738	1025	3	10.7738	1097	1	10.7738	1123	3	10.7738	1173	2	10.7738	1191	3	10.7738	1193	6	10.7738	1167	1	10.7738	834	3	10.7738	879	3
10.786	1240	7	10.786	1212	4	10.786	1077	4	10.786	1043	4	10.786	1111	4	10.786	1047	3	10.786	1219	0	10.786	1162	2	10.786	1236	2	10.786	1193	4	10.786	833	1	10.786	854	4
10.7983	1228	0	10.7983	1221	1	10.7983	1040	6	10.7983	958	3	10.7983	1086	2	10.7983	1076	3	10.7983	1232	8	10.7983	1145	3	10.7983	1197	10	10.7983	1185	3	10.7983	799	3	10.7983	846	3
10.8105	1198	6	10.8105	1213	4	10.8105	1026	3	10.8105	984	3	10.8105	1085	2	10.8105	1065	1	10.8105	1218	5	10.8105	1172	1	10.8105	1230	1	10.8105	1145	5	10.8105	801	1	10.8105	865	5
10.8227	1222	5	10.8227	1219	0	10.8227	1085	8	10.8227	1040	7	10.8227	1058	0	10.8227	989	4	10.8227	1221	3	10.8227	1236	3	10.8227	1198	2	10.8227	1169	6	10.8227	814	3	10.8227	832	1
10.8349	1198	3	10.8349	1217	3	10.8349	985	6	10.8349	987	1	10.8349	1058	1	10.8349	1055	2	10.8349	1131	5	10.8349	1152	1	10.8349	1179	5	10.8349	1193	3	10.8349	838	4	10.8349	821	0
10.8471	1159	5	10.8471	1203	3	10.8471	1066	3	10.8471	1030	1	10.8471	1008	3	10.8471	1055	3	10.8471	1164	8	10.8471	1130	2	10.8471	1187	3	10.8471	1218	4	10.8471	809	3	10.8471	777	1
10.8593	1225	4	10.8593	1258	3	10.8593	1017	1	10.8593	1042	3	10.8593	1077	8	10.8593	1053	3	10.8593	1064	1	10.8593	1091	2	10.8593	1182	5	10.8593	1127	6	10.8593	822	3	10.8593	798	4
10.8715	1224	3	10.8715	1194	4	10.8715	1003	5	10.8715	1035	4	10.8715	1035	3	10.8715	1057	6	10.8715	1121	5	10.8715	1202	5	10.8715	1181	4	10.8715	1118	3	10.8715	858	1	10.8715	824	0
10.8838	1193	3	10.8838	1213	3	10.8838	976	4	10.8838	1052	4	10.8838	1030	5	10.8838	1021	5	10.8838	1105	6	10.8838	1157	6	10.8838	1197	3	10.8838	1194	3	10.8838	812	4	10.8838	796	2
10.896	1201	3	10.896	1224	4	10.896	1082	2	10.896	1034	2	10.896	1028	3	10.896	999	1	10.896	1102	4	10.896	1194	1	10.896	1132	3	10.896	1189	3	10.896	826	5	10.896	801	5
10.9082	1120	1	10.9082	1167	1	10.9082	1013	2	10.9082	1011	5	10.9082	1013	1	10.9082	1072	1	10.9082	1172	5	10.9082	1147	4	10.9082	1142	1	10.9082	1102	3	10.9082	805	2	10.9082	791	4
10.9204	1140	8	10.9204	1157	3	10.9204	1019	3	10.9204	1030	5	10.9204	967	2	10.9204	1037	1	10.9204	1118	5	10.9204	1104	4	10.9204	1208	4	10.9204	1042	1	10.9204	782	3	10.9204	777	1
10.9326	1212	4	10.9326	1157	2	10.9326	1011	6	10.9326	980	5	10.9326	1027	1	10.9326	1047	4	10.9326	1100	3	10.9326	1148	5	10.9326	1174	3	10.9326	1115	5	10.9326	781	5	10.9326	774	4
10.9448	1220	3	10.9448	1128	4	10.9448	944	4	10.9448	1053	5	10.9448	1053	6	10.9448	1013	2	10.9448	1137	3	10.9448	1095	2	10.9448	1126	6	10.9448	1111	2	10.9448	778	1	10.9448	785	5
10.9571	1101	3	10.9571	1113	2	10.9571	1028	6	10.9571	1001	3	10.9571	972	1	10.9571	1006	3	10.9571	1138	3	10.9571	1119	3	10.9571	1145	6	10.9571	1103	3	10.9571	792	4	10.9571	816	2
10.9693	1199	3	10.9693	1186	5	10.9693	954	6	10.9693	955	2	10.9693	1032	4	10.9693	980	2	10.9693	1122	9	10.9693	1126	1	10.9693	1142	3	10.9693	1033	2	10.9693	811	3	10.9693	805	3
10.9815	1184	4	10.9815	1168	6	10.9815	1065	4	10.9815	984	2	10.9815	1007	3	10.9815	1012	2	10.9815	1152	4	10.9815	1141	1	10.9815	1113	5	10.9815	1083	3	10.9815	783	0	10.9815	755	1
10.9937	1111	0	10.9937	1205	0	10.9937	1021	1	10.9937	939	1	10.9937	1012	1	10.9937	1026	1	10.9937	1127	2	10.9937	1072	4	10.9937	1126	1	10.9937	1067	1	10.9937	784	2	10.9937	794	3
11.0059	1100	4	11.0059	1075	5	11.0059	942	11	11.0059	959	1	11.0059	1003	5	11.0059	987	0	11.0059	1135	5	11.0059	1147	2	11.0059	1146	5	11.0059	1109	3	11.0059	784	5	11.0059	780	3
11.0181	1122	2	11.0181	1151	0	11.0181	999	7	11.0181	1029	3	11.0181	943	3	11.0181	995	4	11.0181	1145	1	11.0181	1133	2	11.0181	1126	2	11.0181	1119	4	11.0181	785	5	11.0181	760	4
11.0304	1163	3	11.0304	1101	4	11.0304	944	5	11.0304	954	1	11.0304	940	1	11.0304	971	4	11.0304	1109	7	11.0304	1119	6	11.0304	1131	4	11.0304	1086	2	11.0304	792	3	11.0304	758	1
11.0426	1104	4	11.0426	1076	1	11.0426	956	5	11.0426	900	2	11.0426	1026	1	11.0426	946	3	11.0426	1099	2	11.0426	1112	2	11.0426	1118	5	11.0426	1103	2	11.0426	729	1	11.0426	733	3
11.0548	1116	7	11.0548	1109	2	11.0548	950	3	11.0548	983	7	11.0548	946	2	11.0548	972	2	11.0548	1154	4	11.0548	1141	4	11.0548	1112	4	11.0548	1073	3	11.0548	760	5	11.0548	756	3
11.067	1221	2	11.067	1159	3	11.067	924	6	11.067	920	4	11.067	982	3	11.067	1008	0	11.067	1086	4	11.067	1158	4	11.067	1098	1	11.067	1103	4	11.067	764	3	11.067	732	3
11.0792	1183	6	11.0792	1099	5	11.0792	987	1	11.0792	894	3	11.0792	996	2	11.0792	1043	2	11.0792	1078	4	11.0792	1089	4	11.0792	1114	3	11.0792	1122	2	11.0792	764	2	11.0792	724	2
11.0914	1132	8	11.0914	1132	1	11.0914	954	3	11.0914	943	5	11.0914	1003	3	11.0914	953	5	11.0914	1111	8	11.0914	1107	1	11.0914	1115	2	11.0914	1134	4	11.0914	737	3	11.0914	748	3
11.1036	1108	3	11.1036	1053	2	11.1036	931	4	11.1036	973	7	11.1036	901	4	11.1036	993	2	11.1036	1095	5	11.1036	1089	4	11.1036	1137	2	11.1036	1064	2	11.1036	749	1	11.1036	776	1
11.1159	1222	4	11.1159	1160	0	11.1159	953	6	11.1159	1010	3	11.1159	959	1	11.1159	944	2	11.1159	1065	5	11.1159	1113	5	11.1159	1086	2	11.1159	1089	4	11.1159	747	3	11.1159	732	3
11.1281	1104	5	11.1281	1121	3	11.1281	963	7	11.1281	917	6	11.1281	991	0	11.1281	984	3	11.1281	1115	4	11.1281	1079	0	11.1281	1123	1	11.1281	1105	3	11.1281	758	3	11.1281	722	5
11.1403	1145	3	11.1403	1067	2	11.1403	968	0	11.1403	987	0	11.1403	940	4	11.1403	920	1	11.1403	1053	4	11.1403	1048	4	11.1403	1082	5	11.1403	1045	3	11.1403	690	3	11.1403	726	2
11.1525	1125	3	11.1525	1048	2	11.1525	920	4	11.1525	912	1	11.1525	994	3	11.1525	991	2	11.1525	1052	9	11.1525	1072	0	11.1525	1073	2	11.1525	1046	3	11.1525	752	4	11.1525	741	2
11.1647	1122	3	11.1647	1074	2	11.1647	883	3	11.1647	953	2	11.1647	978	2	11.1647	912	2	11.1647	1081	4	11.1647	1010	4	11.1647	1046	3	11.1647	1045	2	11.1647	740	1	11.1647	752	1
11.1769	1152	4	11.1769	1138	3	11.1769	904	8	11.1769	981	2	11.1769	940	4	11.1769	910	2	11.1769	1066	4	11.1769	1066	2	11.1769	1087	3	11.1769	1088	2	11.1769	755	5	11.1769	703	4
11.1891	1089	4	11.1891	1038	6	11.1891	969	6	11.1891	945	4	11.1891	943	5	11.1891	927	0	11.1891	1029	3	11.1891	1012	3	11.1891	1089	3	11.1891	1067	0	11.1891	755	2	11.1891	719	3
11.2014	1114	0	11.2014	1130	2	11.2014	914	2	11.2014	923	4	11.2014	928	3	11.2014	921	1	11.2014	997	6	11.2014	1073	1	11.2014	1027	2	11.2014	994	2	11.2014	727	2	11.2014	701	3
11.2136	1107	1	11.2136	1054	5	11.2136	923	3	11.2136	899	1	11.2136	962	6	11.2136	897	0	11.2136	1004	3	11.2136	1062	3	11.2136	971	2	11.2136	1000	2	11.2136	744	5	11.2136	747	4
11.2258	1103	3	11.2258	1039	2	11.2258	891	1	11.2258	916	7	11.2258	939	4	11.2258	879	3	11.2258	1046	6	11.2258	1057	3	11.2258	1095	5	11.2258	1032	2	11.2258	691	2	11.2258	677	2
11.238	1084	4	11.238	1034	6	11.238	889	2	11.238	910	4	11.238	948	4	11.238	890	3	11.238	1026	6	11.238	1046	6	11.238	1078	4	11.238	992	4	11.238	729	0	11.238	663	5
11.2502	1055	1	11.2502	1118	4	11.2502	910	0	11.2502	903	0	11.2502	945	2	11.2502	954	2	11.2502	1025	4	11.2502	1028	6	11.2502	960	4	11.2502	999	2	11.2502	691	3	11.2502	691	3
11.2624	1131	4	11.2624	1089	3	11.2624	843	4	11.2624	843	2	11.2624	909	2	11.2624	916	6	11.2624	1018	5	11.2624	1016	3	11.2624	1082	3	11.2624	986	3	11.2624	702	1	11.2624	717	2
11.2747	1109	4	11.2747	1028	3	11.2747	877	4	11.2747	816	0	11.2747	940	3	11.2747	940	1	11.2747	1045	7	11.2747	992	3	11.2747	1064	4	11.2747	1023	2	11.2747	700	5	11.2747	693	4
11.2869	1082	4	11.2869	1079	0	11.2869	941	4	11.2869	886	3	11.2869	895	3	11.2869	940	4	11.2869	1018	6	11.2869	1019	4	11.2869	1065	2	11.2869	1057	3	11.2869	727	5	11.2869	728	2
11.2991	1081	4	11.2991	1044	2	11.2991	887	0	11.2991	925	3	11.2991	908	5	11.2991	851	2	11.2991	1043	3	11.2991	1025	1	11.2991	1094	3	11.2991	996	1	11.2991	680	3	11.2991	699	2
11.3113	1108	4	11.3113	1061	8	11.3113	911	1	11.3113	926	5	11.3113	930	4	11.3113	905	2	11.3113	1049	10	11.3113	1047	2	11.3113	1074	2	11.3113	948	5	11.3113	698	3	11.3113	691	1
11.3235	1127	7	11.3235	997	4	11.3235	902	4	11.3235	850	1	11.3235	921	4	11.3235	934	1	11.3235	1072	10	11.3235	1084	2	11.3235	1079	4	11.3235	1029	2	11.3235	789	3	11.3235	704	4
11.3357	1064	3	11.3357	1013	4	11.3357	868	3	11.3357	915	6	11.3357	896	3	11.3357	919	5	11.3357	1048	6	11.3357	1061	1	11.3357	1039	6	11.3357	1027	3	11.3357	718	3	11.3357	707	1
11.348	1032	4	11.348	1078	2	11.348	888	3	11.348	928	1	11.348	939	3	11.348	958	1	11.348	1019	7	11.348	971	2	11.348	1043	3	11.348	1028	5	11.348	742	2	11.348	684	1
11.3602	1067	3	11.3602	1003	4	11.3602	926	3	11.3602	826	3	11.3602	924	1	11.3602	932	3	11.3602	1040	4	11.3602	1014	1	11.3602	984	4	11.3602	969	4	11.3602	697	4	11.3602	669	3
11.3724	1053	2	11.3724	1077	3	11.3724	924	3	11.3724	866	2	11.3724	887	2	11.3724	913	1	11.3724	1004	5	11.3724	1027	5	11.3724	1101	2	11.3724	1002	2	11.3724	689	1	11.3724	665	1
11.3846	1020	2	11.3846	1106	3	11.3846	937	3	11.3846	848	5	11.3846	904	3	11.3846	871	5	11.3846	999	7	11.3846	1023	2	11.3846	976	2	11.3846	915	1	11.3846	693	5	11.3846	683	2
11.3968	1095	2	11.3968	1026	3	11.3968	951	1	11.3968	848	4	11.3968	952	7	11.3968	886	2	11.3968	956	7	11.3968	1061	4	11.3968	1092	4	11.3968	968	2	11.3968	697	2	11.3968	708	3
11.409	1078	1	11.409	1066	0	11.409	895	6	11.409	908	2	11.409	895	2	11.409	903	0	11.409	983	3	11.409	1045	1	11.409	1056	4	11.409	1023	3	11.409	709	1	11.409	677	0
11.4212	1043	2	11.4212	991	2	11.4212	900	5	11.4212	904	1	11.4212	903	4	11.4212	910	4	11.4212	1009	7	11.4212	997	2	11.4212	1003	6	11.4212	1032	2	11.4212	713	2	11.4212	718	2
11.4335	1100	4	11.4335	1007	4	11.4335	932	1	11.4335	873	2	11.4335	888	3	11.4335	917	3	11.4335	942	4	11.4335	1043	6	11.4335	1040	5	11.4335	973	4	11.4335	675	4	11.4335	701	3
11.4457	1030	2	11.4457	978	4	11.4457	903	4	11.4457	880	8	11.4457	884	2	11.4457	867	1	11.4457	1034	6	11.4457	979	4	11.4457	1000	2	11.4457	975	3	11.4457	643	3	11.4457	680	0
11.4579	988	1	11.4579	1015	3	11.4579	848	4	11.4579	863	2	11.4579	892	2	11.4579	862	2	11.4579	1056	2	11.4579	929	3	11.4579	941	4	11.4579	956	1	11.4579	622	3	11.4579	656	2
11.4701	997	2	11.4701	985	1	11.4701	896	4	11.4701	812	3	11.4701	878	2	11.4701	906	2	11.4701	998	10	11.4701	957	2	11.4701	1019	2	11.4701	1006	4	11.4701	694	2	11.4701	709	5
11.4823	1003	6	11.4823	1023	4	11.4823	855	2	11.4823	863	3	11.4823	860	1	11.4823	854	1	11.4823	986	5	11.4823	907	2	11.4823	992	3	11.4823	960	2	11.4823	696	5	11.4823	681	1
11.4945	978	1	11.4945	1016	2	11.4945	812	3	11.4945	836	3	11.4945	864	5	11.4945	845	1	11.4945	960	5	11.4945	969	2	11.4945	981	5	11.4945	993	4	11.4945	680	2	11.4945	637	3
11.5067	976	3	11.5067	1003	0	11.5067	843	6	11.5067	873	2	11.5067	853	3	11.5067	798	3	11.5067	952	1	11.5067	983	8	11.5067	962	0	11.5067	973	2	11.5067	669	3	11.5067	614	3
11.519	939	1	11.519	1026	5	11.519	909	3	11.519	815	3	11.519	809	1	11.519	801	0	11.519	979	8	11.519	932	1	11.519	950	3	11.519	979	2	11.519	668	5	11.519	693	0
11.5312	1051	3	11.5312	1031	2	11.5312	891	3	11.5312	873	4	11.5312	847	4	11.5312	850	2	11.5312	963	3	11.5312	903	5	11.5312	968	4	11.5312	971	2	11.5312	659	3	11.5312	649	4
11.5434	1000	4	11.5434	996	2	11.5434	794	2	11.5434	869	3	11.5434	806	4	11.5434	836	3	11.5434	916	7	11.5434	904	5	11.5434	941	2	11.5434	934	1	11.5434	657	6	11.5434	631	5
11.5556	1029	4	11.5556	978	2	11.5556	813	0	11.5556	784	6	11.5556	874	2	11.5556	809	3	11.5556	984	7	11.5556	909	2	11.5556	976	2	11.5556	925	1	11.5556	594	4	11.5556	685	5
11.5678	977	2	11.5678	959	5	11.5678	763	9	11.5678	793	1	11.5678	832	5	11.5678	872	4	11.5678	961	3	11.5678	963	1	11.5678	992	1	11.5678	911	5	11.5678	639	2	11.5678	645	4
11.58	990	3	11.58	998	6	11.58	824	6	11.58	785	3	11.58	863	2	11.58	831	3	11.58	887	4	11.58	969	1	11.58	946	0	11.58	908	5	11.58	638	2	11.58	639	4
11.5922	1004	5	11.5922	943	2	11.5922	839	2	11.5922	840	4	11.5922	900	4	11.5922	815	2	11.5922	934	7	11.5922	1006	3	11.5922	962	2	11.5922	890	4	11.5922	654	3	11.5922	665	1
11.6045	965	3	11.6045	970	7	11.6045	834	7	11.6045	788	2	11.6045	867	5	11.6045	805	2	11.6045	927	9	11.6045	969	0	11.6045	971	4	11.6045	917	4	11.6045	593	2	11.6045	658	4
11.6167	853	1	11.6167	940	1	11.6167	894	6	11.6167	766	3	11.6167	796	2	11.6167	789	3	11.6167	914	3	11.6167	906	2	11.6167	922	1	11.6167	896	1	11.6167	678	4	11.6167	649	3
11.6289	942	0	11.6289	948	4	11.6289	871	7	11.6289	805	4	11.6289	858	4	11.6289	860	0	11.6289	919	6	11.6289	921	1	11.6289	886	1	11.6289	934	0	11.6289	627	3	11.6289	637	1
11.6411	915	6	11.6411	926	3	11.6411	810	2	11.6411	788	2	11.6411	864	0	11.6411	821	4	11.6411	879	5	11.6411	899	1	11.6411	956	3	11.6411	908	0	11.6411	627	3	11.6411	632	3
11.6533	895	3	11.6533	927	2	11.6533	815	3	11.6533	848	3	11.6533	849	3	11.6533	858	1	11.6533	881	6	11.6533	929	2	11.6533	930	3	11.6533	866	4	11.6533	631	3	11.6533	634	2
11.6655	957	5	11.6655	912	1	11.6655	783	7	11.6655	823	1	11.6655	820	1	11.6655	812	4	11.6655	904	7	11.6655	886	2	11.6655	944	5	11.6655	881	6	11.6655	635	4	11.6655	618	2
11.6778	919	2	11.6778	942	2	11.6778	799	2	11.6778	842	3	11.6778	768	2	11.6778	846	2	11.6778	901	7	11.6778	959	3	11.6778	1011	0	11.6778	881	3	11.6778	655	5	11.6778	655	1
11.69	950	4	11.69	957	4	11.69	815	4	11.69	776	1	11.69	853	1	11.69	832	4	11.69	906	3	11.69	936	3	11.69	906	2	11.69	954	2	11.69	608	5	11.69	594	3
11.7022	943	0	11.7022	949	5	11.7022	772	2	11.7022	819	6	11.7022	861	2	11.7022	800	0	11.7022	892	5	11.7022	941	2	11.7022	913	5	11.7022	903	1	11.7022	644	5	11.7022	609	1
11.7144	909	5	11.7144	896	0	11.7144	810	2	11.7144	807	1	11.7144	844	2	11.7144	788	4	11.7144	877	4	11.7144	878	2	11.7144	962	4	11.7144	900	4	11.7144	639	3	11.7144	643	2
11.7266	954	5	11.7266	931	1	11.7266	743	5	11.7266	771	3	11.7266	834	3	11.7266	779	1	11.7266	883	6	11.7266	907	3	11.7266	912	4	11.7266	890	5	11.7266	598	4	11.7266	597	3
11.7388	928	5	11.7388	974	0	11.7388	808	6	11.7388	763	3	11.7388	805	3	11.7388	783	2	11.7388	876	1	11.7388	929	3	11.7388	875	4	11.7388	857	4	11.7388	619	3	11.7388	626	0
11.751	905	2	11.751	896	2	11.751	837	3	11.751	778	4	11.751	813	5	11.751	796	3	11.751	921	6	11.751	959	3	11.751	920	6	11.751	920	7	11.751	621	5	11.751	613	2
11.7633	938	3	11.7633	925	1	11.7633	782	3	11.7633	798	2	11.7633	754	1	11.7633	825	1	11.7633	901	5	11.7633	887	2	11.7633	879	3	11.7633	856	2	11.7633	602	2	11.7633	593	3
11.7755	924	3	11.7755	904	2	11.7755	794	5	11.7755	784	3	11.7755	821	1	11.7755	771	0	11.7755	835	9	11.7755	878	3	11.7755	913	2	11.7755	914	7	11.7755	570	6	11.7755	652	4
11.7877	971	5	11.7877	908	3	11.7877	719	2	11.7877	722	4	11.7877	797	2	11.7877	844	1	11.7877	902	8	11.7877	892	3	11.7877	885	1	11.7877	914	2	11.7877	652	0	11.7877	640	1
11.7999	944	6	11.7999	948	2	11.7999	794	5	11.7999	771	2	11.7999	827	2	11.7999	779	5	11.7999	879	4	11.7999	896	2	11.7999	920	3	11.7999	840	9	11.7999	643	2	11.7999	608	3
11.8121	944	3	11.8121	910	5	11.8121	762	6	11.8121	778	3	11.8121	807	1	11.8121	831	4	11.8121	929	10	11.8121	885	0	11.8121	915	2	11.8121	866	1	11.8121	623	2	11.8121	615	2
11.8243	930	5	11.8243	941	2	11.8243	789	2	11.8243	714	5	11.8243	821	3	11.8243	763	4	11.8243	880	8	11.8243	835	3	11.8243	916	5	11.8243	814	4	11.8243	636	2	11.8243	541	3
11.8366	920	4	11.8366	916	2	11.8366	784	1	11.8366	812	1	11.8366	803	2	11.8366	835	4	11.8366	877	10	11.8366	880	3	11.8366	941	4	11.8366	928	2	11.8366	570	6	11.8366	609	3
11.8488	917	5	11.8488	934	5	11.8488	787	5	11.8488	827	1	11.8488	848	2	11.8488	751	2	11.8488	873	7	11.8488	869	1	11.8488	884	4	11.8488	802	3	11.8488	616	4	11.8488	581	4
11.861	920	7	11.861	854	1	11.861	740	4	11.861	720	4	11.861	775	4	11.861	728	4	11.861	848	4	11.861	868	1	11.861	935	3	11.861	846	5	11.861	578	2	11.861	562	4
11.8732	873	5	11.8732	870	0	11.8732	806	3	11.8732	761	3	11.8732	801	1	11.8732	832	3	11.8732	857	1	11.8732	842	1	11.8732	878	3	11.8732	817	2	11.8732	556	2	11.8732	591	1
11.8854	935	4	11.8854	828	3	11.8854	763	5	11.8854	757	3	11.8854	806	3	11.8854	742	1	11.8854	858	2	11.8854	924	5	11.8854	884	1	11.8854	842	4	11.8854	605	7	11.8854	608	5
11.8976	922	4	11.8976	882	3	11.8976	740	2	11.8976	729	5	11.8976	803	2	11.8976	839	5	11.8976	840	7	11.8976	855	6	11.8976	841	1	11.8976	853	2	11.8976	609	3	11.8976	569	2
11.9099	946	4	11.9099	898	3	11.9099	783	4	11.9099	714	1	11.9099	832	2	11.9099	773	1	11.9099	851	6	11.9099	888	0	11.9099	875	4	11.9099	816	1	11.9099	630	6	11.9099	604	2
11.9221	923	6	11.9221	855	3	11.9221	727	4	11.9221	804	2	11.9221	758	0	11.9221	834	2	11.9221	801	4	11.9221	905	4	11.9221	898	2	11.9221	851	3	11.9221	554	2	11.9221	597	2
11.9343	877	2	11.9343	902	8	11.9343	772	3	11.9343	720	3	11.9343	744	1	11.9343	740	3	11.9343	828	5	11.9343	879	2	11.9343	847	2	11.9343	833	5	11.9343	593	3	11.9343	620	1
11.9465	891	4	11.9465	883	4	11.9465	750	4	11.9465	696	3	11.9465	743	4	11.9465	777	1	11.9465	873	7	11.9465	832	2	11.9465	861	6	11.9465	827	3	11.9465	588	4	11.9465	557	2
11.9587	828	3	11.9587	883	3	11.9587	712	3	11.9587	762	4	11.9587	795	3	11.9587	726	0	11.9587	833	5	11.9587	867	3	11.9587	848	0	11.9587	798	1	11.9587	551	1	11.9587	599	3
11.9709	876	2	11.9709	844	3	11.9709	755	4	11.9709	748	3	11.9709	787	2	11.9709	705	3	11.9709	808	5	11.9709	853	2	11.9709	829	0	11.9709	832	3	11.9709	598	1	11.9709	577	5
11.9831	902	0	11.9831	847	4	11.9831	740	2	11.9831	743	5	11.9831	770	2	11.9831	758	4	11.9831	830	4	11.9831	786	4	11.9831	908	4	11.9831	777	1	11.9831	571	2	11.9831	580	3
11.9954	874	0	11.9954	870	2	11.9954	754	3	11.9954	783	4	11.9954	755	7	11.9954	782	3	11.9954	798	3	11.9954	852	2	11.9954	870	2	11.9954	827	1	11.9954	527	4	11.9954	571	1
12.0076	888	3	12.0076	881	5	12.0076	727	2	12.0076	705	1	12.0076	808	1	12.0076	713	5	12.0076	798	4	12.0076	848	5	12.0076	832	4	12.0076	815	5	12.0076	553	1	12.0076	563	2
12.0198	864	3	12.0198	878	2	12.0198	761	1	12.0198	731	3	12.0198	778	0	12.0198	711	2	12.0198	821	8	12.0198	849	4	12.0198	850	5	12.0198	796	3	12.0198	585	5	12.0198	551	2
12.032	889	2	12.032	898	3	12.032	711	3	12.032	708	2	12.032	748	2	12.032	788	1	12.032	805	5	12.032	858	2	12.032	835	7	12.032	773	1	12.032	598	4	12.032	536	6
12.0442	821	0	12.0442	854	4	12.0442	796	4	12.0442	737	4	12.0442	755	1	12.0442	742	3	12.0442	801	3	12.0442	837	2	12.0442	900	7	12.0442	855	4	12.0442	563	5	12.0442	599	4
12.0564	889	2	12.0564	816	2	12.0564	737	4	12.0564	725	5	12.0564	795	2	12.0564	731	1	12.0564	758	7	12.0564	864	1	12.0564	832	7	12.0564	784	6	12.0564	581	0	12.0564	558	2
12.0686	851	2	12.0686	809	1	12.0686	726	5	12.0686	694	4	12.0686	737	3	12.0686	753	1	12.0686	793	6	12.0686	806	4	12.0686	857	1	12.0686	848	3	12.0686	575	4	12.0686	533	1
12.0809	862	5	12.0809	833	4	12.0809	695	3	12.0809	711	3	12.0809	717	2	12.0809	721	2	12.0809	862	3	12.0809	820	1	12.0809	871	2	12.0809	791	2	12.0809	605	3	12.0809	585	3
12.0931	843	3	12.0931	804	5	12.0931	801	2	12.0931	733	3	12.0931	771	0	12.0931	746	7	12.0931	803	5	12.0931	900	2	12.0931	837	7	12.0931	806	4	12.0931	542	3	12.0931	553	1
12.1053	798	1	12.1053	882	2	12.1053	716	3	12.1053	683	2	12.1053	732	4	12.1053	707	2	12.1053	774	1	12.1053	881	5	12.1053	833	4	12.1053	815	3	12.1053	579	4	12.1053	567	3
12.1175	853	3	12.1175	822	1	12.1175	660	3	12.1175	681	3	12.1175	682	3	12.1175	752	2	12.1175	790	8	12.1175	770	4	12.1175	795	5	12.1175	845	2	12.1175	565	1	12.1175	550	4
12.1297	876	7	12.1297	864	3	12.1297	759	3	12.1297	700	3	12.1297	735	3	12.1297	730	4	12.1297	809	7	12.1297	797	3	12.1297	831	3	12.1297	744	3	12.1297	539	0	12.1297	505	4
12.1419	849	2	12.1419	806	1	12.1419	705	4	12.1419	722	2	12.1419	736	0	12.1419	701	7	12.1419	857	3	12.1419	791	2	12.1419	852	5	12.1419	785	2	12.1419	583	5	12.1419	530	2
12.1541	851	2	12.1541	830	3	12.1541	736	1	12.1541	667	1	12.1541	725	3	12.1541	751	3	12.1541	837	2	12.1541	837	3	12.1541	874	3	12.1541	817	5	12.1541	550	2	12.1541	551	0
12.1664	838	3	12.1664	837	2	12.1664	700	5	12.1664	656	5	12.1664	741	3	12.1664	687	4	12.1664	858	7	12.1664	840	2	12.1664	813	2	12.1664	791	4	12.1664	563	2	12.1664	543	0
12.1786	869	2	12.1786	808	2	12.1786	714	5	12.1786	758	3	12.1786	768	1	12.1786	711	2	12.1786	823	3	12.1786	778	4	12.1786	820	2	12.1786	770	1	12.1786	561	2	12.1786	565	3
12.1908	854	5	12.1908	856	5	12.1908	689	4	12.1908	648	3	12.1908	719	3	12.1908	722	1	12.1908	762	5	12.1908	816	3	12.1908	791	3	12.1908	767	2	12.1908	544	2	12.1908	542	4
12.203	823	2	12.203	785	2	12.203	679	2	12.203	696	1	12.203	718	1	12.203	726	0	12.203	780	9	12.203	751	2	12.203	787	1	12.203	760	3	12.203	555	1	12.203	545	3
12.2152	851	6	12.2152	794	2	12.2152	737	4	12.2152	666	3	12.2152	701	3	12.2152	685	2	12.2152	792	4	12.2152	777	3	12.2152	850	2	12.2152	750	4	12.2152	519	1	12.2152	556	2
12.2274	795	2	12.2274	823	2	12.2274	696	3	12.2274	659	3	12.2274	688	1	12.2274	715	3	12.2274	804	5	12.2274	770	7	12.2274	830	3	12.2274	795	3	12.2274	533	5	12.2274	516	3
12.2397	831	0	12.2397	759	3	12.2397	711	2	12.2397	708	3	12.2397	695	3	12.2397	707	4	12.2397	771	4	12.2397	787	3	12.2397	783	2	12.2397	814	1	12.2397	512	3	12.2397	546	3
12.2519	854	5	12.2519	754	2	12.2519	675	4	12.2519	666	3	12.2519	665	6	12.2519	778	1	12.2519	733	1	12.2519	766	4	12.2519	788	0	12.2519	755	5	12.2519	543	2	12.2519	509	2
12.2641	823	4	12.2641	787	3	12.2641	655	3	12.2641	682	1	12.2641	693	3	12.2641	681	5	12.2641	803	4	12.2641	792	2	12.2641	745	2	12.2641	772	3	12.2641	514	2	12.2641	529	5
12.2763	808	1	12.2763	769	6	12.2763	651	5	12.2763	681	5	12.2763	678	1	12.2763	704	1	12.2763	782	5	12.2763	806	0	12.2763	808	6	12.2763	730	2	12.2763	524	1	12.2763	514	2
12.2885	798	3	12.2885	817	1	12.2885	711	6	12.2885	598	5	12.2885	699	0	12.2885	703	5	12.2885	737	4	12.2885	776	3	12.2885	805	1	12.2885	777	1	12.2885	512	1	12.2885	498	2
12.3007	781	2	12.3007	799	3	12.3007	652	3	12.3007	674	2	12.3007	728	2	12.3007	709	6	12.3007	768	5	12.3007	784	1	12.3007	769	5	12.3007	726	1	12.3007	534	4	12.3007	541	0
12.313	795	0	12.313	813	5	12.313	701	1	12.313	639	3	12.313	704	2	12.313	686	2	12.313	717	7	12.313	797	5	12.313	786	2	12.313	781	6	12.313	516	3	12.313	481	3
12.3252	811	8	12.3252	758	3	12.3252	661	0	12.3252	632	1	12.3252	697	5	12.3252	684	7	12.3252	781	5	12.3252	741	6	12.3252	834	4	12.3252	722	2	12.3252	538	2	12.3252	501	4
12.3374	854	5	12.3374	761	4	12.3374	613	5	12.3374	640	7	12.3374	678	3	12.3374	767	0	12.3374	728	4	12.3374	731	2	12.3374	754	1	12.3374	746	5	12.3374	511	1	12.3374	488	3
12.3496	809	3	12.3496	757	4	12.3496	656	2	12.3496	692	2	12.3496	660	1	12.3496	704	4	12.3496	793	5	12.3496	790	3	12.3496	735	4	12.3496	759	6	12.3496	501	3	12.3496	534	6
12.3618	810	1	12.3618	755	3	12.3618	671	5	12.3618	663	1	12.3618	686	2	12.3618	678	3	12.3618	746	3	12.3618	765	1	12.3618	736	2	12.3618	786	4	12.3618	506	5	12.3618	481	0
12.374	820	2	12.374	751	2	12.374	641	1	12.374	673	1	12.374	736	1	12.374	673	3	12.374	749	7	12.374	796	3	12.374	738	0	12.374	703	1	12.374	530	1	12.374	456	1
12.3862	784	2	12.3862	797	3	12.3862	649	8	12.3862	688	2	12.3862	693	2	12.3862	672	1	12.3862	703	2	12.3862	748	5	12.3862	738	6	12.3862	740	1	12.3862	482	3	12.3862	551	1
12.3985	795	5	12.3985	759	5	12.3985	659	4	12.3985	671	5	12.3985	663	1	12.3985	716	4	12.3985	769	3	12.3985	808	3	12.3985	732	5	12.3985	713	1	12.3985	506	5	12.3985	523	4
12.4107	794	5	12.4107	754	5	12.4107	655	4	12.4107	627	3	12.4107	715	5	12.4107	664	2	12.4107	769	7	12.4107	717	4	12.4107	786	1	12.4107	744	3	12.4107	527	3	12.4107	487	4
12.4229	800	3	12.4229	768	2	12.4229	668	2	12.4229	710	2	12.4229	687	1	12.4229	684	4	12.4229	755	4	12.4229	711	6	12.4229	755	1	12.4229	676	2	12.4229	500	2	12.4229	528	2
12.4351	803	3	12.4351	740	0	12.4351	647	1	12.4351	608	2	12.4351	694	1	12.4351	676	5	12.4351	734	3	12.4351	800	3	12.4351	787	2	12.4351	707	3	12.4351	503	3	12.4351	494	4
12.4473	785	5	12.4473	783	2	12.4473	622	2	12.4473	678	1	12.4473	689	4	12.4473	634	2	12.4473	776	2	12.4473	692	3	12.4473	704	2	12.4473	741	6	12.4473	592	2	12.4473	496	2
12.4595	783	5	12.4595	778	4	12.4595	649	4	12.4595	692	4	12.4595	682	2	12.4595	655	4	12.4595	759	3	12.4595	751	3	12.4595	728	1	12.4595	765	4	12.4595	529	2	12.4595	498	4
12.4718	756	5	12.4718	743	3	12.4718	621	4	12.4718	659	7	12.4718	708	2	12.4718	661	3	12.4718	735	9	12.4718	721	0	12.4718	780	2	12.4718	695	5	12.4718	485	7	12.4718	526	5
12.484	769	4	12.484	700	8	12.484	663	4	12.484	567	4	12.484	709	1	12.484	654	2	12.484	749	2	12.484	696	2	12.484	735	4	12.484	738	0	12.484	551	6	12.484	460	3
12.4962	802	2	12.4962	791	4	12.4962	648	5	12.4962	653	6	12.4962	671	1	12.4962	640	3	12.4962	716	2	12.4962	754	1	12.4962	744	3	12.4962	687	1	12.4962	491	1	12.4962	474	1
12.5084	732	4	12.5084	733	1	12.5084	643	1	12.5084	598	3	12.5084	688	0	12.5084	657	1	12.5084	726	7	12.5084	751	4	12.5084	733	0	12.5084	715	2	12.5084	510	2	12.5084	481	0
12.5206	808	1	12.5206	752	5	12.5206	644	0	12.5206	707	1	12.5206	622	1	12.5206	647	5	12.5206	755	4	12.5206	700	3	12.5206	678	5	12.5206	693	4	12.5206	493	1	12.5206	494	3
12.5328	773	3	12.5328	769	3	12.5328	644	4	12.5328	598	1	12.5328	685	3	12.5328	610	3	12.5328	753	2	12.5328	748	0	12.5328	756	6	12.5328	713	2	12.5328	484	2	12.5328	472	2
12.545	778	3	12.545	752	4	12.545	643	5	12.545	642	3	12.545	636	3	12.545	661	2	12.545	705	6	12.545	750	4	12.545	701	3	12.545	744	1	12.545	505	3	12.545	489	1
12.5572	755	0	12.5572	734	2	12.5572	629	6	12.5572	593	3	12.5572	643	4	12.5572	675	3	12.5572	709	3	12.5572	768	2	12.5572	750	3	12.5572	652	2	12.5572	480	5	12.5572	477	2
12.5695	756	4	12.5695	718	6	12.5695	584	1	12.5695	666	4	12.5695	641	1	12.5695	672	3	12.5695	699	5	12.5695	722	2	12.5695	744	6	12.5695	760	1	12.5695	529	5	12.5695	496	1
12.5817	784	3	12.5817	730	5	12.5817	644	4	12.5817	602	2	12.5817	650	3	12.5817	649	5	12.5817	703	6	12.5817	744	1	12.5817	782	0	12.5817	716	1	12.5817	482	5	12.5817	518	1
12.5939	725	3	12.5939	719	3	12.5939	656	2	12.5939	624	2	12.5939	632	4	12.5939	646	1	12.5939	744	4	12.5939	737	1	12.5939	753	5	12.5939	654	5	12.5939	485	5	12.5939	478	0
12.6061	774	4	12.6061	728	2	12.6061	655	2	12.6061	610	4	12.6061	659	4	12.6061	640	1	12.6061	700	4	12.6061	732	2	12.6061	747	2	12.6061	657	2	12.6061	491	1	12.6061	436	3
12.6183	712	3	12.6183	788	3	12.6183	613	2	12.6183	618	2	12.6183	644	0	12.6183	609	1	12.6183	733	3	12.6183	747	2	12.6183	753	3	12.6183	694	7	12.6183	486	2	12.6183	467	2
12.6305	693	2	12.6305	765	3	12.6305	589	1	12.6305	617	3	12.6305	591	4	12.6305	673	1	12.6305	682	6	12.6305	705	3	12.6305	756	2	12.6305	678	2	12.6305	486	2	12.6305	459	3
12.6428	712	2	12.6428	750	3	12.6428	581	3	12.6428	613	1	12.6428	664	2	12.6428	609	8	12.6428	729	7	12.6428	715	1	12.6428	709	1	12.6428	686	3	12.6428	491	1	12.6428	461	2
12.655	727	1	12.655	714	2	12.655	592	1	12.655	575	5	12.655	656	1	12.655	604	4	12.655	710	4	12.655	710	1	12.655	750	1	12.655	645	2	12.655	466	4	12.655	452	2
12.6672	751	4	12.6672	747	2	12.6672	600	5	12.6672	560	4	12.6672	644	5	12.6672	630	3	12.6672	711	2	12.6672	660	4	12.6672	712	5	12.6672	707	2	12.6672	448	1	12.6672	487	3
12.6794	760	1	12.6794	713	4	12.6794	635	2	12.6794	608	1	12.6794	609	1	12.6794	668	6	12.6794	660	8	12.6794	732	3	12.6794	694	2	12.6794	697	4	12.6794	483	0	12.6794	471	4
12.6916	743	4	12.6916	676	1	12.6916	595	5	12.6916	584	2	12.6916	605	2	12.6916	649	5	12.6916	668	0	12.6916	677	5	12.6916	726	4	12.6916	670	2	12.6916	480	2	12.6916	454	5
12.7038	685	3	12.7038	687	5	12.7038	584	2	12.7038	556	3	12.7038	638	3	12.7038	625	2	12.7038	698	1	12.7038	705	4	12.7038	714	3	12.7038	672	1	12.7038	476	2	12.7038	430	3
12.716	700	1	12.716	669	2	12.716	617	5	12.716	591	1	12.716	647	3	12.716	609	4	12.716	703	4	12.716	686	2	12.716	732	0	12.716	739	2	12.716	441	4	12.716	463	2
12.7283	749	2	12.7283	700	3	12.7283	617	0	12.7283	596	2	12.7283	631	3	12.7283	578	2	12.7283	637	2	12.7283	660	4	12.7283	689	0	12.7283	696	3	12.7283	436	7	12.7283	479	0
12.7405	704	5	12.7405	666	7	12.7405	572	5	12.7405	591	3	12.7405	672	2	12.7405	585	2	12.7405	695	4	12.7405	695	2	12.7405	683	0	12.7405	669	3	12.7405	438	2	12.7405	432	3
12.7527	738	0	12.7527	693	1	12.7527	603	6	12.7527	614	5	12.7527	598	2	12.7527	638	1	12.7527	650	8	12.7527	705	4	12.7527	708	3	12.7527	716	4	12.7527	473	6	12.7527	466	2
12.7649	726	2	12.7649	717	2	12.7649	565	4	12.7649	573	6	12.7649	617	4	12.7649	667	2	12.7649	641	5	12.7649	721	5	12.7649	748	4	12.7649	671	2	12.7649	481	1	12.7649	467	4
12.7771	678	0	12.7771	725	4	12.7771	584	1	12.7771	594	3	12.7771	610	2	12.7771	573	0	12.7771	685	5	12.7771	687	3	12.7771	689	0	12.7771	668	3	12.7771	469	2	12.7771	470	6
12.7893	693	4	12.7893	709	4	12.7893	606	5	12.7893	629	1	12.7893	629	4	12.7893	623	2	12.7893	637	11	12.7893	702	3	12.7893	682	1	12.7893	676	1	12.7893	484	2	12.7893	429	4
12.8016	705	6	12.8016	674	1	12.8016	618	2	12.8016	586	5	12.8016	591	5	12.8016	607	1	12.8016	666	3	12.8016	656	4	12.8016	674	3	12.8016	680	4	12.8016	453	2	12.8016	442	5
12.8138	719	2	12.8138	707	0	12.8138	636	4	12.8138	626	1	12.8138	642	2	12.8138	632	4	12.8138	654	5	12.8138	700	2	12.8138	680	3	12.8138	698	4	12.8138	464	1	12.8138	419	2
12.826	718	5	12.826	745	1	12.826	607	4	12.826	595	1	12.826	637	3	12.826	603	0	12.826	719	4	12.826	677	3	12.826	664	4	12.826	651	6	12.826	398	3	12.826	462	2
12.8382	637	2	12.8382	713	3	12.8382	583	2	12.8382	554	2	12.8382	602	4	12.8382	639	1	12.8382	680	3	12.8382	684	3	12.8382	712	2	12.8382	632	2	12.8382	470	5	12.8382	397	1
12.8504	694	5	12.8504	731	3	12.8504	582	3	12.8504	547	1	12.8504	608	0	12.8504	601	2	12.8504	655	6	12.8504	688	4	12.8504	664	3	12.8504	671	4	12.8504	458	4	12.8504	461	5
12.8626	714	2	12.8626	677	1	12.8626	540	4	12.8626	571	2	12.8626	603	1	12.8626	608	2	12.8626	629	6	12.8626	697	1	12.8626	663	2	12.8626	684	4	12.8626	446	6	12.8626	436	3
12.8749	685	2	12.8749	708	5	12.8749	563	1	12.8749	586	2	12.8749	619	2	12.8749	580	1	12.8749	650	7	12.8749	647	3	12.8749	695	6	12.8749	607	2	12.8749	408	3	12.8749	414	4
12.8871	703	5	12.8871	690	5	12.8871	586	1	12.8871	571	3	12.8871	602	2	12.8871	591	2	12.8871	660	4	12.8871	670	1	12.8871	692	1	12.8871	654	5	12.8871	444	2	12.8871	396	1
12.8993	652	1	12.8993	675	1	12.8993	641	6	12.8993	529	7	12.8993	654	2	12.8993	610	1	12.8993	706	4	12.8993	622	2	12.8993	641	5	12.8993	611	1	12.8993	438	2	12.8993	443	1
12.9115	645	3	12.9115	625	1	12.9115	574	7	12.9115	545	2	12.9115	622	3	12.9115	617	0	12.9115	631	4	12.9115	593	4	12.9115	663	1	12.9115	639	2	12.9115	433	4	12.9115	444	6
12.9237	659	3	12.9237	648	4	12.9237	564	5	12.9237	613	2	12.9237	592	1	12.9237	583	0	12.9237	637	2	12.9237	647	1	12.9237	672	1	12.9237	641	3	12.9237	439	0	12.9237	459	3
12.9359	660	2	12.9359	635	5	12.9359	559	2	12.9359	537	7	12.9359	633	1	12.9359	569	3	12.9359	664	4	12.9359	676	2	12.9359	634	1	12.9359	629	2	12.9359	449	2	12.9359	431	0
12.9481	642	3	12.9481	667	3	12.9481	569	7	12.9481	571	2	12.9481	619	1	12.9481	574	0	12.9481	593	5	12.9481	662	1	12.9481	639	3	12.9481	630	1	12.9481	445	4	12.9481	399	2
12.9604	683	2	12.9604	633	2	12.9604	588	6	12.9604	575	2	12.9604	566	1	12.9604	585	2	12.9604	660	9	12.9604	614	1	12.9604	596	1	12.9604	625	4	12.9604	439	2	12.9604	404	2
12.9726	726	1	12.9726	683	2	12.9726	553	8	12.9726	536	3	12.9726	594	5	12.9726	544	4	12.9726	655	3	12.9726	653	5	12.9726	675	1	12.9726	654	1	12.9726	413	4	12.9726	423	1
12.9848	650	3	12.9848	655	3	12.9848	549	1	12.9848	549	0	12.9848	541	3	12.9848	631	2	12.9848	620	8	12.9848	636	2	12.9848	647	0	12.9848	662	3	12.9848	444	2	12.9848	442	0
12.997	657	5	12.997	660	2	12.997	603	2	12.997	516	3	12.997	558	2	12.997	614	7	12.997	625	2	12.997	631	5	12.997	631	2	12.997	607	1	12.997	408	2	12.997	414	4
13.0092	672	0	13.0092	609	5	13.0092	540	2	13.0092	610	0	13.0092	667	4	13.0092	537	1	13.0092	645	6	13.0092	613	4	13.0092	643	3	13.0092	632	0	13.0092	424	3	13.0092	441	2
13.0214	687	3	13.0214	667	3	13.0214	512	4	13.0214	517	3	13.0214	589	1	13.0214	599	1	13.0214	651	3	13.0214	679	1	13.0214	640	1	13.0214	629	2	13.0214	437	0	13.0214	423	2
13.0336	677	1	13.0336	667	3	13.0336	569	5	13.0336	556	5	13.0336	590	0	13.0336	553	2	13.0336	668	9	13.0336	700	3	13.0336	661	4	13.0336	628	2	13.0336	420	3	13.0336	409	4
13.0459	678	3	13.0459	676	3	13.0459	562	2	13.0459	510	3	13.0459	584	1	13.0459	595	3	13.0459	587	2	13.0459	607	5	13.0459	622	3	13.0459	637	4	13.0459	420	4	13.0459	427	3
13.0581	692	2	13.0581	693	6	13.0581	567	3	13.0581	519	3	13.0581	601	2	13.0581	553	2	13.0581	628	2	13.0581	633	2	13.0581	668	3	13.0581	640	0	13.0581	455	2	13.0581	429	4
13.0703	634	1	13.0703	657	7	13.0703	587	3	13.0703	564	3	13.0703	563	1	13.0703	572	1	13.0703	639	4	13.0703	602	1	13.0703	621	3	13.0703	611	0	13.0703	419	2	13.0703	399	2
13.0825	689	3	13.0825	671	1	13.0825	544	3	13.0825	540	2	13.0825	570	4	13.0825	548	4	13.0825	596	4	13.0825	612	4	13.0825	637	3	13.0825	567	5	13.0825	414	1	13.0825	388	1
13.0947	664	4	13.0947	630	2	13.0947	533	3	13.0947	526	2	13.0947	588	2	13.0947	578	3	13.0947	590	5	13.0947	645	3	13.0947	685	3	13.0947	635	0	13.0947	410	1	13.0947	424	1
13.1069	633	1	13.1069	645	1	13.1069	574	4	13.1069	550	3	13.1069	587	2	13.1069	594	3	13.1069	656	3	13.1069	612	1	13.1069	653	2	13.1069	595	5	13.1069	447	0	13.1069	425	2
13.1191	632	2	13.1191	612	2	13.1191	553	6	13.1191	500	5	13.1191	566	0	13.1191	565	4	13.1191	584	3	13.1191	672	2	13.1191	645	4	13.1191	584	2	13.1191	423	4	13.1191	399	1
13.1314	664	3	13.1314	629	3	13.1314	526	4	13.1314	525	4	13.1314	587	1	13.1314	580	1	13.1314	595	6	13.1314	614	2	13.1314	658	3	13.1314	584	1	13.1314	419	2	13.1314	426	2
13.1436	628	2	13.1436	611	2	13.1436	530	7	13.1436	551	5	13.1436	571	3	13.1436	602	1	13.1436	636	6	13.1436	603	4	13.1436	583	2	13.1436	631	3	13.1436	449	2	13.1436	456	0
13.1558	620	0	13.1558	587	3	13.1558	521	3	13.1558	504	1	13.1558	609	1	13.1558	544	2	13.1558	586	6	13.1558	686	0	13.1558	633	2	13.1558	591	2	13.1558	433	1	13.1558	380	1
13.168	628	4	13.168	655	2	13.168	533	1	13.168	553	13	13.168	576	1	13.168	563	4	13.168	625	3	13.168	608	2	13.168	639	3	13.168	594	6	13.168	408	5	13.168	412	1
13.1802	607	4	13.1802	595	0	13.1802	532	2	13.1802	521	3	13.1802	564	5	13.1802	548	2	13.1802	623	2	13.1802	602	0	13.1802	633	0	13.1802	588	0	13.1802	422	6	13.1802	411	1
13.1924	653	1	13.1924	606	2	13.1924	575	2	13.1924	471	4	13.1924	560	2	13.1924	560	0	13.1924	608	5	13.1924	585	5	13.1924	586	3	13.1924	635	2	13.1924	409	1	13.1924	375	1
13.2047	592	2	13.2047	544	2	13.2047	550	3	13.2047	488	2	13.2047	574	2	13.2047	570	2	13.2047	581	5	13.2047	586	1	13.2047	654	2	13.2047	599	2	13.2047	414	0	13.2047	399	0
13.2169	656	1	13.2169	637	3	13.2169	532	1	13.2169	497	6	13.2169	584	2	13.2169	543	2	13.2169	616	6	13.2169	588	4	13.2169	603	3	13.2169	564	2	13.2169	421	4	13.2169	396	4
13.2291	613	1	13.2291	639	2	13.2291	584	6	13.2291	523	4	13.2291	550	2	13.2291	543	1	13.2291	628	3	13.2291	561	1	13.2291	564	3	13.2291	588	2	13.2291	406	2	13.2291	395	6
13.2413	615	0	13.2413	634	4	13.2413	520	4	13.2413	513	0	13.2413	575	4	13.2413	554	4	13.2413	543	4	13.2413	590	1	13.2413	614	2	13.2413	615	2	13.2413	392	1	13.2413	411	4
13.2535	602	3	13.2535	619	2	13.2535	526	5	13.2535	538	3	13.2535	557	5	13.2535	556	2	13.2535	614	5	13.2535	574	1	13.2535	636	1	13.2535	541	1	13.2535	419	4	13.2535	406	2
13.2657	608	4	13.2657	639	5	13.2657	515	2	13.2657	466	2	13.2657	502	4	13.2657	569	2	13.2657	571	3	13.2657	559	4	13.2657	588	5	13.2657	588	4	13.2657	401	1	13.2657	398	2
13.278	623	3	13.278	646	2	13.278	523	3	13.278	502	7	13.278	575	3	13.278	536	3	13.278	569	4	13.278	572	1	13.278	598	1	13.278	564	4	13.278	395	1	13.278	388	4
13.2902	599	3	13.2902	648	6	13.2902	540	3	13.2902	543	1	13.2902	573	3	13.2902	533	1	13.2902	587	7	13.2902	564	5	13.2902	596	5	13.2902	575	2	13.2902	409	1	13.2902	376	3
13.3024	596	3	13.3024	548	4	13.3024	542	3	13.3024	517	2	13.3024	522	1	13.3024	512	2	13.3024	578	1	13.3024	602	3	13.3024	595	2	13.3024	546	6	13.3024	392	2	13.3024	374	3
13.3146	607	1	13.3146	674	6	13.3146	529	4	13.3146	485	1	13.3146	536	6	13.3146	540	1	13.3146	597	2	13.3146	553	2	13.3146	628	4	13.3146	585	6	13.3146	380	1	13.3146	396	2
13.3268	631	2	13.3268	570	5	13.3268	482	4	13.3268	566	3	13.3268	541	0	13.3268	499	4	13.3268	575	2	13.3268	619	1	13.3268	552	3	13.3268	560	6	13.3268	374	2	13.3268	391	0
13.339	575	4	13.339	593	4	13.339	464	5	13.339	488	4	13.339	519	2	13.339	562	1	13.339	580	5	13.339	612	4	13.339	573	3	13.339	584	2	13.339	357	3	13.339	391	6
13.3512	602	6	13.3512	576	4	13.3512	486	3	13.3512	496	2	13.3512	524	2	13.3512	497	1	13.3512	580	5	13.3512	608	0	13.3512	580	3	13.3512	570	2	13.3512	376	2	13.3512	400	3
13.3635	641	5	13.3635	573	1	13.3635	472	4	13.3635	499	3	13.3635	524	1	13.3635	487	6	13.3635	607	2	13.3635	612	3	13.3635	595	7	13.3635	622	5	13.3635	359	4	13.3635	393	3
13.3757	578	3	13.3757	634	4	13.3757	524	3	13.3757	497	1	13.3757	503	5	13.3757	557	1	13.3757	540	4	13.3757	560	1	13.3757	577	2	13.3757	592	3	13.3757	397	1	13.3757	375	4
13.3879	596	2	13.3879	545	3	13.3879	497	3	13.3879	499	1	13.3879	513	1	13.3879	537	1	13.3879	544	6	13.3879	588	3	13.3879	568	1	13.3879	568	2	13.3879	379	1	13.3879	389	2
13.4001	645	2	13.4001	603	1	13.4001	480	2	13.4001	515	3	13.4001	515	3	13.4001	478	4	13.4001	583	6	13.4001	570	3	13.4001	556	2	13.4001	537	2	13.4001	412	2	13.4001	372	1
13.4123	578	0	13.4123	598	4	13.4123	460	4	13.4123	479	2	13.4123	553	0	13.4123	546	2	13.4123	572	1	13.4123	529	2	13.4123	561	3	13.4123	525	1	13.4123	369	4	13.4123	353	3
13.4245	582	3	13.4245	617	4	13.4245	523	0	13.4245	470	1	13.4245	511	2	13.4245	504	1	13.4245	607	4	13.4245	583	2	13.4245	600	4	13.4245	524	4	13.4245	359	3	13.4245	361	2
13.4367	604	0	13.4367	576	3	13.4367	491	4	13.4367	450	2	13.4367	514	3	13.4367	527	4	13.4367	551	10	13.4367	521	6	13.4367	568	3	13.4367	528	3	13.4367	377	3	13.4367	357	1
13.449	577	2	13.449	579	4	13.449	482	0	13.449	458	3	13.449	477	3	13.449	482	1	13.449	564	1	13.449	568	2	13.449	553	1	13.449	533	4	13.449	372	1	13.449	382	1
13.4612	623	2	13.4612	617	2	13.4612	519	4	13.4612	455	3	13.4612	526	4	13.4612	485	3	13.4612	551	5	13.4612	558	1	13.4612	564	3	13.4612	532	3	13.4612	374	1	13.4612	361	3
13.4734	589	3	13.4734	598	5	13.4734	493	1	13.4734	518	1	13.4734	480	2	13.4734	511	2	13.4734	545	6	13.4734	568	3	13.4734	567	4	13.4734	534	5	13.4734	388	4	13.4734	376	0
13.4856	631	5	13.4856	614	4	13.4856	482	0	13.4856	462	3	13.4856	513	2	13.4856	510	1	13.4856	518	4	13.4856	564	1	13.4856	562	2	13.4856	587	3	13.4856	373	0	13.4856	361	2
13.4978	576	1	13.4978	591	2	13.4978	492	2	13.4978	519	0	13.4978	537	2	13.4978	528	3	13.4978	540	4	13.4978	559	2	13.4978	581	6	13.4978	527	2	13.4978	343	3	13.4978	337	3
13.51	581	2	13.51	540	3	13.51	488	2	13.51	436	4	13.51	538	4	13.51	494	1	13.51	523	3	13.51	526	4	13.51	521	4	13.51	579	3	13.51	391	2	13.51	375	1
13.5223	607	4	13.5223	561	5	13.5223	513	2	13.5223	479	2	13.5223	515	4	13.5223	536	4	13.5223	528	8	13.5223	547	4	13.5223	549	6	13.5223	545	1	13.5223	350	5	13.5223	341	2
13.5345	550	1	13.5345	573	3	13.5345	460	10	13.5345	475	3	13.5345	490	4	13.5345	491	2	13.5345	555	4	13.5345	535	1	13.5345	520	0	13.5345	511	3	13.5345	346	2	13.5345	358	1
13.5467	577	3	13.5467	588	3	13.5467	446	0	13.5467	461	3	13.5467	503	2	13.5467	474	1	13.5467	522	5	13.5467	576	2	13.5467	535	1	13.5467	535	4	13.5467	339	1	13.5467	354	1
13.5589	567	6	13.5589	536	3	13.5589	466	4	13.5589	471	4	13.5589	484	0	13.5589	508	1	13.5589	521	3	13.5589	582	3	13.5589	529	3	13.5589	527	1	13.5589	335	4	13.5589	360	4
13.5711	601	4	13.5711	548	2	13.5711	471	4	13.5711	436	0	13.5711	513	5	13.5711	511	2	13.5711	532	2	13.5711	604	0	13.5711	531	3	13.5711	538	3	13.5711	367	2	13.5711	371	2
13.5833	518	2	13.5833	573	0	13.5833	468	1	13.5833	461	3	13.5833	498	6	13.5833	521	0	13.5833	530	4	13.5833	521	2	13.5833	581	2	13.5833	521	2	13.5833	386	3	13.5833	327	3
13.5955	630	3	13.5955	538	2	13.5955	448	3	13.5955	458	2	13.5955	495	1	13.5955	495	3	13.5955	571	3	13.5955	531	2	13.5955	574	3	13.5955	560	5	13.5955	317	2	13.5955	366	2
13.6078	562	3	13.6078	545	1	13.6078	483	3	13.6078	469	6	13.6078	462	1	13.6078	483	2	13.6078	565	4	13.6078	552	3	13.6078	555	2	13.6078	534	2	13.6078	370	3	13.6078	357	2
13.62	551	2	13.62	600	2	13.62	481	4	13.62	443	2	13.62	548	6	13.62	526	3	13.62	523	5	13.62	513	3	13.62	570	3	13.62	533	5	13.62	354	1	13.62	382	0
13.6322	582	5	13.6322	529	4	13.6322	472	3	13.6322	468	3	13.6322	526	0	13.6322	506	2	13.6322	512	0	13.6322	561	2	13.6322	581	4	13.6322	512	2	13.6322	358	2	13.6322	351	4
13.6444	603	2	13.6444	575	3	13.6444	443	3	13.6444	440	0	13.6444	498	3	13.6444	463	2	13.6444	532	1	13.6444	538	1	13.6444	544	2	13.6444	510	0	13.6444	334	6	13.6444	361	3
13.6566	591	2	13.6566	565	2	13.6566	489	0	13.6566	453	2	13.6566	452	5	13.6566	463	0	13.6566	510	5	13.6566	569	4	13.6566	582	2	13.6566	507	4	13.6566	327	3	13.6566	396	1
13.6688	570	5	13.6688	563	4	13.6688	455	1	13.6688	430	0	13.6688	530	1	13.6688	501	4	13.6688	493	2	13.6688	575	0	13.6688	546	5	13.6688	535	2	13.6688	355	2	13.6688	361	3
13.6811	555	4	13.6811	579	2	13.6811	470	0	13.6811	448	4	13.6811	451	0	13.6811	467	6	13.6811	537	6	13.6811	529	4	13.6811	520	1	13.6811	509	3	13.6811	376	3	13.6811	384	1
13.6933	568	4	13.6933	592	2	13.6933	482	5	13.6933	428	1	13.6933	482	2	13.6933	524	2	13.6933	549	2	13.6933	520	2	13.6933	542	2	13.6933	525	1	13.6933	382	1	13.6933	339	1
13.7055	558	4	13.7055	528	2	13.7055	451	1	13.7055	427	4	13.7055	510	3	13.7055	492	4	13.7055	535	2	13.7055	558	2	13.7055	526	6	13.7055	527	3	13.7055	370	4	13.7055	349	1
13.7177	514	1	13.7177	549	7	13.7177	470	1	13.7177	431	2	13.7177	496	1	13.7177	495	2	13.7177	518	2	13.7177	554	5	13.7177	508	1	13.7177	529	0	13.7177	372	6	13.7177	350	0
13.7299	607	2	13.7299	533	0	13.7299	398	1	13.7299	460	3	13.7299	525	1	13.7299	452	1	13.7299	519	6	13.7299	509	2	13.7299	528	6	13.7299	514	2	13.7299	331	2	13.7299	360	4
13.7421	523	1	13.7421	518	2	13.7421	465	3	13.7421	462	4	13.7421	480	3	13.7421	484	4	13.7421	509	5	13.7421	525	3	13.7421	553	5	13.7421	528	5	13.7421	371	5	13.7421	355	1
13.7544	536	3	13.7544	563	1	13.7544	439	5	13.7544	457	0	13.7544	467	2	13.7544	435	1	13.7544	478	6	13.7544	531	2	13.7544	539	2	13.7544	554	0	13.7544	329	1	13.7544	339	0
13.7666	528	1	13.7666	497	3	13.7666	461	3	13.7666	466	4	13.7666	479	3	13.7666	491	1	13.7666	512	4	13.7666	520	4	13.7666	535	2	13.7666	514	2	13.7666	330	0	13.7666	333	3
13.7788	554	1	13.7788	541	3	13.7788	394	5	13.7788	442	2	13.7788	458	4	13.7788	468	2	13.7788	529	2	13.7788	486	1	13.7788	507	5	13.7788	509	2	13.7788	316	0	13.7788	363	0
13.791	541	2	13.791	532	3	13.791	434	0	13.791	423	1	13.791	462	3	13.791	468	3	13.791	493	3	13.791	511	1	13.791	536	3	13.791	506	1	13.791	296	3	13.791	316	1
13.8032	558	2	13.8032	488	1	13.8032	433	3	13.8032	430	1	13.8032	507	1	13.8032	503	5	13.8032	507	6	13.8032	564	3	13.8032	525	3	13.8032	503	2	13.8032	352	2	13.8032	348	2
13.8154	545	0	13.8154	563	3	13.8154	440	3	13.8154	443	4	13.8154	448	2	13.8154	446	4	13.8154	525	5	13.8154	526	6	13.8154	517	2	13.8154	531	5	13.8154	326	2	13.8154	360	0
13.8276	524	0	13.8276	521	3	13.8276	428	0	13.8276	455	3	13.8276	444	2	13.8276	490	5	13.8276	496	0	13.8276	495	1	13.8276	542	3	13.8276	518	5	13.8276	358	3	13.8276	346	1
13.8399	566	1	13.8399	538	4	13.8399	436	4	13.8399	398	1	13.8399	454	4	13.8399	485	0	13.8399	506	2	13.8399	545	1	13.8399	512	2	13.8399	481	1	13.8399	360	0	13.8399	346	3
13.8521	471	1	13.8521	540	3	13.8521	466	4	13.8521	476	3	13.8521	424	5	13.8521	447	0	13.8521	475	3	13.8521	519	4	13.8521	515	2	13.8521	499	4	13.8521	330	3	13.8521	365	1
13.8643	529	2	13.8643	475	3	13.8643	451	3	13.8643	427	0	13.8643	447	1	13.8643	441	2	13.8643	485	4	13.8643	502	2	13.8643	490	3	13.8643	494	3	13.8643	349	2	13.8643	324	4
13.8765	518	3	13.8765	487	2	13.8765	443	5	13.8765	461	2	13.8765	455	0	13.8765	454	0	13.8765	483	4	13.8765	493	0	13.8765	503	2	13.8765	460	2	13.8765	349	1	13.8765	346	1
13.8887	509	0	13.8887	527	2	13.8887	431	2	13.8887	421	1	13.8887	480	3	13.8887	462	3	13.8887	514	0	13.8887	520	3	13.8887	532	3	13.8887	476	5	13.8887	345	1	13.8887	328	5
13.9009	523	5	13.9009	520	2	13.9009	440	2	13.9009	435	3	13.9009	474	1	13.9009	435	1	13.9009	507	9	13.9009	512	1	13.9009	491	1	13.9009	459	4	13.9009	325	2	13.9009	335	0
13.9131	574	0	13.9131	459	1	13.9131	409	4	13.9131	447	2	13.9131	492	1	13.9131	440	6	13.9131	512	3	13.9131	466	1	13.9131	518	0	13.9131	510	4	13.9131	313	0	13.9131	318	3
13.9254	519	1	13.9254	466	5	13.9254	455	6	13.9254	395	3	13.9254	468	1	13.9254	473	6	13.9254	507	6	13.9254	491	0	13.9254	528	5	13.9254	504	6	13.9254	338	3	13.9254	333	3
13.9376	512	4	13.9376	522	1	13.9376	426	4	13.9376	430	2	13.9376	461	2	13.9376	462	0	13.9376	534	4	13.9376	479	3	13.9376	530	3	13.9376	480	1	13.9376	345	5	13.9376	354	2
13.9498	532	4	13.9498	512	2	13.9498	447	2	13.9498	433	1	13.9498	468	3	13.9498	440	2	13.9498	494	10	13.9498	500	3	13.9498	506	1	13.9498	482	2	13.9498	292	1	13.9498	312	0
13.962	513	5	13.962	487	2	13.962	416	2	13.962	436	4	13.962	465	3	13.962	469	1	13.962	453	5	13.962	489	1	13.962	537	4	13.962	459	2	13.962	333	2	13.962	284	2
13.9742	534	4	13.9742	529	5	13.9742	452	3	13.9742	398	5	13.9742	461	1	13.9742	460	0	13.9742	467	5	13.9742	504	4	13.9742	505	3	13.9742	462	4	13.9742	303	2	13.9742	301	3
13.9864	515	1	13.9864	484	1	13.9864	431	5	13.9864	442	4	13.9864	476	5	13.9864	428	3	13.9864	492	4	13.9864	521	2	13.9864	458	4	13.9864	453	3	13.9864	305	1	13.9864	332	2
13.9986	524	3	13.9986	515	4	13.9986	400	3	13.9986	384	7	13.9986	443	3	13.9986	424	2	13.9986	478	1	13.9986	503	2	13.9986	510	3	13.9986	455	3	13.9986	306	1	13.9986	324	2
14.0109	509	0	14.0109	489	8	14.0109	414	3	14.0109	407	3	14.0109	428	1	14.0109	452	6	14.0109	476	4	14.0109	471	5	14.0109	489	7	14.0109	441	2	14.0109	352	0	14.0109	320	3
14.0231	490	3	14.0231	489	7	14.0231	424	4	14.0231	426	6	14.0231	432	5	14.0231	479	1	14.0231	472	5	14.0231	465	3	14.0231	471	3	14.0231	455	1	14.0231	350	3	14.0231	295	3
14.0353	521	2	14.0353	503	2	14.0353	418	4	14.0353	380	4	14.0353	416	4	14.0353	444	1	14.0353	448	5	14.0353	507	1	14.0353	490	2	14.0353	438	1	14.0353	318	2	14.0353	314	2
14.0475	484	1	14.0475	472	3	14.0475	391	2	14.0475	384	2	14.0475	411	2	14.0475	448	2	14.0475	438	4	14.0475	468	3	14.0475	502	1	14.0475	468	4	14.0475	312	5	14.0475	356	1
14.0597	465	3	14.0597	526	5	14.0597	427	4	14.0597	384	1	14.0597	444	0	14.0597	443	1	14.0597	471	3	14.0597	500	6	14.0597	499	2	14.0597	471	7	14.0597	313	2	14.0597	284	3
14.0719	499	1	14.0719	512	1	14.0719	381	5	14.0719	416	3	14.0719	421	5	14.0719	467	3	14.0719	481	7	14.0719	494	4	14.0719	448	1	14.0719	505	6	14.0719	285	5	14.0719	306	4
14.0842	460	2	14.0842	485	5	14.0842	419	4	14.0842	394	3	14.0842	420	2	14.0842	442	0	14.0842	480	4	14.0842	470	3	14.0842	453	3	14.0842	463	1	14.0842	310	1	14.0842	323	3
14.0964	479	1	14.0964	506	5	14.0964	380	5	14.0964	406	0	14.0964	434	2	14.0964	404	1	14.0964	447	3	14.0964	464	2	14.0964	497	2	14.0964	455	2	14.0964	316	2	14.0964	314	1
14.1086	495	1	14.1086	488	1	14.1086	406	3	14.1086	396	2	14.1086	437	4	14.1086	432	1	14.1086	453	4	14.1086	492	0	14.1086	444	4	14.1086	481	5	14.1086	303	2	14.1086	280	0
14.1208	502	2	14.1208	467	5	14.1208	425	2	14.1208	416	1	14.1208	417	1	14.1208	430	2	14.1208	465	1	14.1208	483	0	14.1208	451	2	14.1208	476	3	14.1208	295	5	14.1208	270	3
14.133	501	4	14.133	431	1	14.133	390	3	14.133	375	4	14.133	432	2	14.133	438	3	14.133	467	7	14.133	461	1	14.133	435	1	14.133	488	1	14.133	314	3	14.133	300	5
14.1452	493	5	14.1452	464	2	14.1452	398	4	14.1452	396	6	14.1452	417	0	14.1452	455	2	14.1452	453	4	14.1452	443	1	14.1452	439	3	14.1452	453	3	14.1452	342	4	14.1452	298	1
14.1575	484	3	14.1575	470	3	14.1575	407	3	14.1575	406	1	14.1575	369	4	14.1575	433	2	14.1575	452	4	14.1575	442	4	14.1575	445	4	14.1575	432	6	14.1575	324	0	14.1575	319	4
14.1697	502	0	14.1697	470	0	14.1697	396	3	14.1697	373	1	14.1697	419	5	14.1697	413	1	14.1697	416	7	14.1697	452	4	14.1697	465	2	14.1697	479	1	14.1697	287	4	14.1697	281	2
14.1819	502	5	14.1819	499	4	14.1819	397	4	14.1819	393	1	14.1819	426	1	14.1819	403	0	14.1819	494	5	14.1819	457	2	14.1819	473	4	14.1819	423	4	14.1819	279	6	14.1819	316	2
14.1941	495	2	14.1941	486	1	14.1941	358	2	14.1941	426	4	14.1941	445	1	14.1941	408	1	14.1941	456	3	14.1941	443	5	14.1941	497	2	14.1941	450	3	14.1941	317	5	14.1941	298	3
14.2063	466	0	14.2063	486	3	14.2063	378	2	14.2063	365	0	14.2063	440	7	14.2063	347	2	14.2063	457	5	14.2063	443	2	14.2063	474	1	14.2063	478	3	14.2063	288	3	14.2063	314	3
14.2185	545	3	14.2185	476	4	14.2185	339	4	14.2185	364	2	14.2185	444	4	14.2185	407	0	14.2185	454	5	14.2185	488	1	14.2185	443	6	14.2185	475	0	14.2185	294	4	14.2185	280	2
14.2307	473	3	14.2307	471	2	14.2307	417	1	14.2307	412	4	14.2307	413	6	14.2307	404	4	14.2307	445	5	14.2307	457	1	14.2307	481	1	14.2307	467	2	14.2307	324	4	14.2307	314	3
14.243	492	7	14.243	465	2	14.243	372	5	14.243	357	1	14.243	448	1	14.243	442	3	14.243	444	2	14.243	480	1	14.243	479	0	14.243	477	2	14.243	333	1	14.243	271	4
14.2552	469	3	14.2552	490	5	14.2552	351	2	14.2552	400	2	14.2552	393	4	14.2552	436	2	14.2552	436	3	14.2552	465	1	14.2552	465	1	14.2552	436	2	14.2552	329	2	14.2552	303	0
14.2674	484	3	14.2674	460	3	14.2674	402	2	14.2674	391	3	14.2674	434	3	14.2674	420	6	14.2674	446	2	14.2674	447	2	14.2674	444	4	14.2674	444	2	14.2674	296	3	14.2674	288	5
14.2796	468	1	14.2796	443	4	14.2796	384	4	14.2796	381	3	14.2796	402	4	14.2796	374	4	14.2796	418	3	14.2796	477	4	14.2796	469	3	14.2796	413	1	14.2796	320	1	14.2796	287	3
14.2918	483	0	14.2918	455	3	14.2918	376	4	14.2918	376	2	14.2918	407	1	14.2918	447	3	14.2918	446	7	14.2918	430	2	14.2918	477	1	14.2918	408	4	14.2918	311	1	14.2918	305	3
14.304	431	1	14.304	439	2	14.304	369	3	14.304	394	4	14.304	389	5	14.304	422	2	14.304	435	2	14.304	446	2	14.304	465	2	14.304	438	4	14.304	276	3	14.304	321	2
14.3163	478	2	14.3163	472	3	14.3163	382	3	14.3163	393	6	14.3163	417	5	14.3163	422	1	14.3163	425	3	14.3163	458	3	14.3163	449	1	14.3163	411	3	14.3163	299	1	14.3163	274	2
14.3285	468	3	14.3285	462	3	14.3285	379	2	14.3285	344	5	14.3285	414	1	14.3285	375	3	14.3285	436	1	14.3285	455	0	14.3285	438	2	14.3285	431	4	14.3285	300	3	14.3285	312	5
14.3407	455	2	14.3407	437	5	14.3407	391	1	14.3407	368	0	14.3407	434	4	14.3407	433	2	14.3407	446	4	14.3407	416	2	14.3407	399	1	14.3407	393	4	14.3407	282	3	14.3407	290	2
14.3529	455	2	14.3529	462	2	14.3529	341	1	14.3529	374	5	14.3529	407	5	14.3529	422	1	14.3529	423	4	14.3529	460	1	14.3529	455	1	14.3529	405	1	14.3529	268	3	14.3529	309	3
14.3651	451	1	14.3651	418	2	14.3651	384	1	14.3651	393	0	14.3651	411	1	14.3651	394	2	14.3651	442	3	14.3651	426	2	14.3651	433	11	14.3651	429	3	14.3651	289	4	14.3651	288	1
14.3773	481	3	14.3773	459	1	14.3773	366	5	14.3773	399	4	14.3773	440	2	14.3773	398	4	14.3773	401	5	14.3773	454	2	14.3773	493	1	14.3773	435	1	14.3773	263	5	14.3773	280	5
14.3895	447	3	14.3895	434	2	14.3895	370	3	14.3895	354	0	14.3895	421	3	14.3895	381	3	14.3895	447	7	14.3895	460	1	14.3895	402	0	14.3895	425	8	14.3895	303	1	14.3895	283	5
14.4017	446	1	14.4017	414	1	14.4017	368	4	14.4017	390	1	14.4017	393	5	14.4017	376	1	14.4017	419	3	14.4017	442	1	14.4017	431	4	14.4017	373	0	14.4017	282	1	14.4017	313	1
14.414	450	2	14.414	432	4	14.414	347	5	14.414	354	4	14.414	400	0	14.414	352	2	14.414	401	3	14.414	429	2	14.414	434	3	14.414	393	2	14.414	242	2	14.414	288	4
14.4262	452	1	14.4262	450	2	14.4262	370	3	14.4262	370	2	14.4262	448	1	14.4262	423	4	14.4262	378	2	14.4262	422	0	14.4262	415	1	14.4262	403	3	14.4262	277	3	14.4262	288	4
14.4384	483	4	14.4384	407	1	14.4384	368	2	14.4384	377	2	14.4384	383	0	14.4384	418	0	14.4384	416	3	14.4384	448	2	14.4384	440	4	14.4384	400	2	14.4384	266	1	14.4384	305	4
14.4506	474	4	14.4506	446	2	14.4506	353	3	14.4506	329	1	14.4506	378	0	14.4506	356	1	14.4506	402	0	14.4506	424	2	14.4506	437	0	14.4506	442	1	14.4506	273	2	14.4506	262	1
14.4628	458	1	14.4628	438	6	14.4628	409	3	14.4628	349	2	14.4628	410	3	14.4628	402	2	14.4628	444	8	14.4628	458	1	14.4628	429	4	14.4628	433	4	14.4628	288	1	14.4628	279	2
14.475	408	0	14.475	444	2	14.475	360	3	14.475	358	4	14.475	426	1	14.475	369	2	14.475	425	7	14.475	437	2	14.475	421	1	14.475	389	2	14.475	301	2	14.475	249	1
14.4873	451	3	14.4873	426	1	14.4873	413	2	14.4873	380	6	14.4873	379	2	14.4873	377	1	14.4873	462	4	14.4873	435	2	14.4873	426	2	14.4873	405	2	14.4873	265	1	14.4873	289	2
14.4995	454	3	14.4995	454	3	14.4995	351	4	14.4995	374	3	14.4995	405	1	14.4995	360	2	14.4995	404	1	14.4995	418	0	14.4995	411	1	14.4995	397	1	14.4995	288	1	14.4995	273	1
14.5117	445	1	14.5117	429	1	14.5117	342	3	14.5117	324	4	14.5117	379	1	14.5117	371	4	14.5117	428	4	14.5117	449	1	14.5117	452	4	14.5117	426	2	14.5117	264	2	14.5117	243	3
14.5239	440	3	14.5239	457	1	14.5239	386	1	14.5239	342	0	14.5239	384	2	14.5239	386	1	14.5239	405	6	14.5239	420	5	14.5239	424	4	14.5239	414	1	14.5239	291	3	14.5239	258	4
14.5361	467	1	14.5361	435	5	14.5361	412	3	14.5361	388	3	14.5361	392	0	14.5361	354	4	14.5361	425	6	14.5361	419	1	14.5361	433	4	14.5361	430	2	14.5361	260	3	14.5361	291	4
14.5483	415	4	14.5483	468	2	14.5483	340	8	14.5483	355	3	14.5483	361	3	14.5483	354	1	14.5483	424	7	14.5483	384	5	14.5483	367	2	14.5483	420	3	14.5483	276	2	14.5483	245	2
14.5605	436	3	14.5605	407	2	14.5605	382	3	14.5605	373	2	14.5605	374	2	14.5605	390	0	14.5605	392	4	14.5605	383	0	14.5605	419	1	14.5605	368	4	14.5605	268	1	14.5605	263	1
14.5728	395	3	14.5728	431	4	14.5728	395	2	14.5728	382	2	14.5728	391	2	14.5728	368	3	14.5728	410	5	14.5728	386	2	14.5728	439	2	14.5728	398	2	14.5728	258	1	14.5728	260	4
14.585	457	5	14.585	411	3	14.585	370	2	14.585	356	1	14.585	357	4	14.585	376	5	14.585	423	6	14.585	387	3	14.585	414	2	14.585	382	3	14.585	297	4	14.585	255	3
14.5972	443	4	14.5972	404	3	14.5972	392	5	14.5972	383	1	14.5972	385	1	14.5972	389	4	14.5972	375	8	14.5972	406	6	14.5972	429	3	14.5972	429	4	14.5972	239	3	14.5972	240	1
14.6094	463	5	14.6094	405	1	14.6094	348	4	14.6094	317	4	14.6094	392	2	14.6094	337	0	14.6094	438	6	14.6094	395	2	14.6094	427	1	14.6094	437	1	14.6094	267	3	14.6094	272	3
14.6216	419	3	14.6216	454	3	14.6216	343	4	14.6216	342	3	14.6216	379	3	14.6216	385	1	14.6216	424	4	14.6216	449	2	14.6216	383	2	14.6216	417	1	14.6216	246	4	14.6216	291	1
14.6338	405	2	14.6338	432	5	14.6338	317	2	14.6338	339	2	14.6338	377	2	14.6338	367	1	14.6338	427	9	14.6338	447	0	14.6338	415	3	14.6338	400	0	14.6338	301	4	14.6338	267	2
14.6461	422	3	14.6461	427	2	14.6461	353	4	14.6461	358	1	14.6461	360	2	14.6461	378	2	14.6461	397	1	14.6461	388	3	14.6461	421	4	14.6461	406	6	14.6461	278	2	14.6461	259	1
14.6583	393	2	14.6583	440	3	14.6583	363	3	14.6583	340	3	14.6583	345	2	14.6583	381	2	14.6583	406	3	14.6583	424	2	14.6583	388	0	14.6583	381	5	14.6583	259	4	14.6583	249	2
14.6705	425	0	14.6705	393	5	14.6705	353	3	14.6705	357	1	14.6705	359	2	14.6705	377	4	14.6705	386	1	14.6705	414	3	14.6705	379	2	14.6705	423	1	14.6705	248	0	14.6705	296	2
14.6827	414	0	14.6827	408	1	14.6827	358	1	14.6827	337	1	14.6827	325	2	14.6827	393	0	14.6827	373	7	14.6827	407	0	14.6827	402	0	14.6827	368	0	14.6827	301	0	14.6827	264	3
14.6949	467	0	14.6949	403	3	14.6949	351	3	14.6949	304	1	14.6949	373	2	14.6949	352	4	14.6949	399	0	14.6949	395	1	14.6949	400	7	14.6949	347	1	14.6949	273	0	14.6949	240	1
14.7071	405	2	14.7071	417	1	14.7071	352	3	14.7071	344	2	14.7071	350	1	14.7071	361	2	14.7071	353	5	14.7071	400	3	14.7071	386	7	14.7071	416	2	14.7071	250	2	14.7071	262	1
14.7194	423	6	14.7194	439	2	14.7194	359	2	14.7194	342	2	14.7194	365	7	14.7194	317	0	14.7194	369	2	14.7194	371	1	14.7194	414	4	14.7194	404	3	14.7194	263	1	14.7194	244	0
14.7316	404	2	14.7316	426	1	14.7316	334	1	14.7316	347	1	14.7316	372	1	14.7316	370	3	14.7316	397	4	14.7316	396	1	14.7316	375	1	14.7316	386	1	14.7316	255	3	14.7316	241	3
14.7438	403	2	14.7438	424	5	14.7438	344	6	14.7438	315	3	14.7438	392	1	14.7438	356	1	14.7438	400	3	14.7438	390	1	14.7438	376	2	14.7438	415	7	14.7438	240	2	14.7438	249	5
14.756	428	2	14.756	413	0	14.756	304	4	14.756	301	1	14.756	342	2	14.756	363	1	14.756	383	7	14.756	413	1	14.756	373	1	14.756	370	2	14.756	253	1	14.756	265	4
14.7682	424	1	14.7682	406	0	14.7682	307	3	14.7682	336	2	14.7682	333	1	14.7682	353	1	14.7682	376	3	14.7682	359	0	14.7682	401	3	14.7682	367	0	14.7682	250	0	14.7682	236	3
14.7804	399	5	14.7804	460	4	14.7804	321	1	14.7804	321	0	14.7804	331	0	14.7804	381	3	14.7804	370	4	14.7804	353	2	14.7804	400	2	14.7804	383	4	14.7804	269	3	14.7804	244	1
14.7926	409	1	14.7926	379	0	14.7926	342	4	14.7926	336	1	14.7926	382	4	14.7926	350	2	14.7926	418	3	14.7926	402	2	14.7926	431	5	14.7926	397	2	14.7926	275	1	14.7926	256	4
14.8049	396	4	14.8049	415	2	14.8049	352	3	14.8049	343	4	14.8049	346	0	14.8049	324	2	14.8049	371	1	14.8049	393	2	14.8049	400	2	14.8049	384	0	14.8049	243	3	14.8049	261	4
14.8171	403	5	14.8171	456	3	14.8171	371	2	14.8171	352	5	14.8171	379	4	14.8171	373	4	14.8171	376	5	14.8171	426	3	14.8171	390	1	14.8171	414	0	14.8171	225	0	14.8171	238	3
14.8293	427	3	14.8293	391	1	14.8293	307	7	14.8293	313	5	14.8293	366	3	14.8293	350	4	14.8293	379	3	14.8293	399	2	14.8293	393	2	14.8293	393	2	14.8293	255	4	14.8293	244	2
14.8415	390	1	14.8415	401	2	14.8415	334	2	14.8415	306	1	14.8415	367	1	14.8415	307	1	14.8415	381	5	14.8415	388	1	14.8415	374	1	14.8415	377	1	14.8415	235	2	14.8415	262	0
14.8537	390	4	14.8537	346	1	14.8537	282	4	14.8537	348	2	14.8537	366	2	14.8537	343	2	14.8537	362	2	14.8537	371	0	14.8537	409	4	14.8537	384	2	14.8537	230	4	14.8537	234	1
14.8659	387	1	14.8659	381	3	14.8659	309	1	14.8659	311	3	14.8659	384	0	14.8659	364	4	14.8659	369	5	14.8659	369	2	14.8659	383	1	14.8659	387	3	14.8659	228	2	14.8659	253	2
14.8781	440	4	14.8781	421	1	14.8781	310	4	14.8781	323	2	14.8781	331	1	14.8781	355	3	14.8781	345	6	14.8781	386	1	14.8781	394	2	14.8781	389	1	14.8781	245	4	14.8781	247	2
14.8904	444	4	14.8904	393	2	14.8904	327	2	14.8904	354	4	14.8904	337	3	14.8904	370	4	14.8904	357	5	14.8904	392	5	14.8904	362	1	14.8904	393	3	14.8904	281	2	14.8904	237	4
14.9026	416	0	14.9026	398	4	14.9026	339	1	14.9026	314	2	14.9026	378	3	14.9026	370	5	14.9026	399	3	14.9026	391	1	14.9026	393	3	14.9026	391	1	14.9026	224	4	14.9026	234	2
14.9148	425	3	14.9148	410	4	14.9148	326	3	14.9148	301	2	14.9148	371	1	14.9148	371	2	14.9148	396	3	14.9148	386	2	14.9148	410	3	14.9148	394	4	14.9148	286	1	14.9148	249	3
14.927	417	3	14.927	421	4	14.927	357	7	14.927	330	3	14.927	337	1	14.927	369	2	14.927	382	4	14.927	396	1	14.927	398	0	14.927	340	3	14.927	249	1	14.927	245	0
14.9392	388	4	14.9392	395	3	14.9392	308	0	14.9392	315	1	14.9392	382	2	14.9392	363	3	14.9392	388	4	14.9392	377	1	14.9392	365	3	14.9392	344	0	14.9392	218	2	14.9392	235	3
14.9514	391	5	14.9514	382	3	14.9514	322	4	14.9514	327	3	14.9514	337	2	14.9514	341	1	14.9514	382	3	14.9514	379	3	14.9514	419	2	14.9514	395	2	14.9514	215	4	14.9514	233	1
14.9636	390	2	14.9636	358	1	14.9636	340	0	14.9636	336	3	14.9636	338	2	14.9636	319	1	14.9636	374	7	14.9636	365	0	14.9636	384	6	14.9636	368	2	14.9636	211	0	14.9636	237	1
14.9759	382	2	14.9759	387	4	14.9759	322	6	14.9759	298	3	14.9759	344	1	14.9759	315	3	14.9759	381	5	14.9759	375	2	14.9759	377	2	14.9759	388	3	14.9759	243	3	14.9759	238	2
14.9881	399	2	14.9881	368	4	14.9881	293	4	14.9881	307	4	14.9881	352	1	14.9881	294	5	14.9881	355	3	14.9881	356	2	14.9881	370	3	14.9881	376	3	14.9881	234	3	14.9881	213	2
15.0003	404	2	15.0003	398	3	15.0003	321	3	15.0003	325	1	15.0003	335	5	15.0003	363	2	15.0003	362	2	15.0003	398	4	15.0003	362	0	15.0003	366	1	15.0003	238	1	15.0003	199	1
15.0125	417	2	15.0125	365	2	15.0125	317	3	15.0125	320	5	15.0125	379	1	15.0125	344	2	15.0125	350	1	15.0125	402	4	15.0125	391	1	15.0125	360	1	15.0125	249	0	15.0125	248	1
15.0247	392	1	15.0247	415	2	15.0247	304	2	15.0247	305	3	15.0247	354	3	15.0247	340	3	15.0247	355	7	15.0247	359	2	15.0247	374	3	15.0247	335	1	15.0247	216	2	15.0247	253	2
15.0369	390	1	15.0369	373	4	15.0369	308	3	15.0369	333	0	15.0369	345	2	15.0369	322	4	15.0369	351	6	15.0369	367	2	15.0369	333	4	15.0369	379	3	15.0369	280	1	15.0369	235	1
15.0492	378	1	15.0492	376	1	15.0492	294	3	15.0492	279	1	15.0492	337	0	15.0492	338	2	15.0492	341	6	15.0492	381	2	15.0492	369	2	15.0492	360	5	15.0492	234	2	15.0492	234	2
15.0614	368	6	15.0614	370	2	15.0614	335	3	15.0614	286	3	15.0614	321	2	15.0614	318	2	15.0614	403	4	15.0614	326	2	15.0614	375	3	15.0614	384	1	15.0614	248	3	15.0614	233	2
15.0736	342	4	15.0736	375	1	15.0736	306	3	15.0736	295	3	15.0736	376	4	15.0736	360	1	15.0736	337	7	15.0736	366	2	15.0736	371	4	15.0736	367	2	15.0736	218	2	15.0736	243	2
15.0858	410	1	15.0858	378	1	15.0858	319	2	15.0858	312	1	15.0858	334	1	15.0858	310	2	15.0858	379	1	15.0858	342	2	15.0858	334	3	15.0858	325	0	15.0858	234	0	15.0858	202	1
15.098	386	2	15.098	371	2	15.098	333	4	15.098	309	2	15.098	322	2	15.098	321	4	15.098	374	2	15.098	350	1	15.098	360	3	15.098	353	4	15.098	247	6	15.098	244	2
15.1102	417	2	15.1102	367	2	15.1102	333	3	15.1102	293	1	15.1102	368	4	15.1102	342	3	15.1102	354	1	15.1102	371	3	15.1102	350	3	15.1102	345	3	15.1102	251	4	15.1102	238	1
15.1225	364	2	15.1225	367	1	15.1225	315	3	15.1225	296	2	15.1225	290	0	15.1225	321	4	15.1225	353	3	15.1225	357	2	15.1225	360	0	15.1225	342	1	15.1225	229	3	15.1225	240	6
15.1347	385	2	15.1347	360	1	15.1347	332	6	15.1347	287	4	15.1347	361	5	15.1347	331	5	15.1347	372	4	15.1347	422	4	15.1347	362	3	15.1347	358	5	15.1347	226	5	15.1347	223	1
15.1469	350	4	15.1469	391	5	15.1469	322	2	15.1469	302	1	15.1469	323	3	15.1469	334	2	15.1469	370	3	15.1469	380	3	15.1469	363	4	15.1469	367	2	15.1469	218	0	15.1469	226	0
15.1591	384	3	15.1591	417	1	15.1591	286	7	15.1591	288	1	15.1591	328	2	15.1591	322	1	15.1591	334	2	15.1591	342	1	15.1591	338	5	15.1591	359	3	15.1591	243	3	15.1591	234	2
15.1713	356	3	15.1713	339	1	15.1713	300	0	15.1713	289	1	15.1713	293	2	15.1713	327	1	15.1713	339	4	15.1713	379	0	15.1713	398	5	15.1713	361	0	15.1713	248	2	15.1713	211	3
15.1835	377	2	15.1835	385	4	15.1835	295	3	15.1835	322	3	15.1835	325	3	15.1835	320	0	15.1835	349	3	15.1835	313	4	15.1835	358	3	15.1835	354	2	15.1835	236	3	15.1835	229	3
15.1957	381	5	15.1957	348	0	15.1957	313	1	15.1957	298	1	15.1957	330	2	15.1957	344	1	15.1957	357	7	15.1957	367	1	15.1957	341	3	15.1957	325	5	15.1957	240	2	15.1957	225	0
15.208	381	2	15.208	358	1	15.208	305	3	15.208	308	4	15.208	349	1	15.208	336	3	15.208	347	4	15.208	321	1	15.208	384	3	15.208	378	2	15.208	217	1	15.208	184	3
15.2202	362	1	15.2202	339	0	15.2202	272	2	15.2202	307	3	15.2202	331	2	15.2202	297	2	15.2202	383	3	15.2202	340	1	15.2202	353	2	15.2202	346	1	15.2202	196	4	15.2202	210	3
15.2324	393	2	15.2324	357	2	15.2324	278	2	15.2324	303	2	15.2324	304	3	15.2324	342	4	15.2324	352	3	15.2324	364	1	15.2324	330	4	15.2324	339	3	15.2324	213	3	15.2324	227	2
15.2446	357	6	15.2446	355	1	15.2446	318	2	15.2446	280	3	15.2446	308	2	15.2446	330	0	15.2446	319	6	15.2446	390	1	15.2446	358	1	15.2446	328	1	15.2446	225	1	15.2446	223	3
15.2568	346	3	15.2568	375	1	15.2568	294	2	15.2568	303	7	15.2568	357	2	15.2568	309	3	15.2568	343	4	15.2568	356	0	15.2568	362	0	15.2568	335	1	15.2568	199	3	15.2568	220	1
15.269	324	5	15.269	351	6	15.269	306	2	15.269	302	2	15.269	313	2	15.269	326	0	15.269	325	3	15.269	319	1	15.269	365	2	15.269	351	6	15.269	228	2	15.269	212	1
15.2812	377	3	15.2812	358	3	15.2812	274	1	15.2812	274	3	15.2812	320	1	15.2812	302	4	15.2812	322	3	15.2812	339	4	15.2812	331	6	15.2812	274	3	15.2812	238	2	15.2812	233	3
15.2935	357	6	15.2935	370	3	15.2935	280	5	15.2935	252	3	15.2935	335	3	15.2935	351	0	15.2935	314	3	15.2935	350	1	15.2935	332	1	15.2935	336	4	15.2935	230	1	15.2935	229	2
15.3057	341	5	15.3057	337	4	15.3057	289	3	15.3057	299	1	15.3057	325	2	15.3057	294	1	15.3057	321	1	15.3057	348	2	15.3057	317	2	15.3057	323	2	15.3057	221	2	15.3057	237	0
15.3179	339	2	15.3179	367	0	15.3179	284	1	15.3179	305	6	15.3179	327	1	15.3179	293	6	15.3179	329	2	15.3179	310	2	15.3179	301	3	15.3179	355	6	15.3179	225	3	15.3179	222	0
15.3301	327	3	15.3301	344	3	15.3301	294	3	15.3301	259	4	15.3301	356	2	15.3301	312	1	15.3301	336	9	15.3301	335	1	15.3301	343	1	15.3301	348	5	15.3301	191	1	15.3301	192	0
15.3423	360	4	15.3423	340	3	15.3423	262	2	15.3423	278	1	15.3423	346	4	15.3423	296	0	15.3423	305	3	15.3423	325	2	15.3423	341	1	15.3423	306	5	15.3423	215	2	15.3423	227	3
15.3545	365	5	15.3545	333	1	15.3545	269	3	15.3545	269	4	15.3545	312	3	15.3545	300	2	15.3545	330	3	15.3545	309	2	15.3545	321	2	15.3545	315	7	15.3545	217	4	15.3545	253	1
15.3668	357	1	15.3668	322	2	15.3668	282	2	15.3668	293	0	15.3668	331	0	15.3668	342	1	15.3668	337	5	15.3668	320	1	15.3668	305	4	15.3668	323	1	15.3668	210	1	15.3668	217	2
15.379	348	2	15.379	359	4	15.379	277	5	15.379	244	1	15.379	308	3	15.379	355	3	15.379	317	5	15.379	334	0	15.379	358	1	15.379	310	2	15.379	219	0	15.379	211	1
15.3912	334	2	15.3912	328	2	15.3912	304	6	15.3912	299	2	15.3912	304	3	15.3912	318	3	15.3912	330	2	15.3912	360	4	15.3912	333	3	15.3912	328	2	15.3912	206	2	15.3912	191	2
15.4034	346	3	15.4034	351	1	15.4034	291	1	15.4034	255	1	15.4034	289	6	15.4034	305	1	15.4034	292	2	15.4034	335	0	15.4034	318	1	15.4034	373	4	15.4034	202	1	15.4034	217	2
15.4156	340	2	15.4156	332	5	15.4156	287	1	15.4156	247	4	15.4156	309	1	15.4156	288	2	15.4156	303	3	15.4156	326	2	15.4156	322	4	15.4156	348	2	15.4156	206	2	15.4156	178	5
15.4278	335	1	15.4278	336	3	15.4278	293	2	15.4278	283	2	15.4278	352	2	15.4278	311	0	15.4278	321	6	15.4278	317	1	15.4278	339	3	15.4278	310	1	15.4278	221	2	15.4278	206	1
15.44	366	5	15.44	357	1	15.44	293	4	15.44	267	3	15.44	316	1	15.44	317	2	15.44	289	3	15.44	346	1	15.44	335	3	15.44	318	4	15.44	219	3	15.44	245	3
15.4523	338	1	15.4523	317	2	15.4523	280	1	15.4523	268	2	15.4523	323	3	15.4523	319	1	15.4523	333	5	15.4523	335	2	15.4523	346	1	15.4523	333	4	15.4523	218	1	15.4523	180	3
15.4645	385	2	15.4645	337	1	15.4645	271	2	15.4645	259	3	15.4645	312	1	15.4645	321	4	15.4645	307	1	15.4645	332	3	15.4645	351	3	15.4645	286	1	15.4645	218	4	15.4645	212	0
15.4767	336	2	15.4767	332	2	15.4767	263	3	15.4767	232	2	15.4767	306	4	15.4767	287	5	15.4767	333	6	15.4767	352	3	15.4767	355	2	15.4767	301	1	15.4767	215	3	15.4767	195	3
15.4889	333	3	15.4889	342	4	15.4889	266	5	15.4889	262	1	15.4889	278	0	15.4889	285	2	15.4889	322	0	15.4889	323	3	15.4889	370	2	15.4889	311	1	15.4889	224	1	15.4889	213	7
15.5011	317	1	15.5011	334	6	15.5011	249	2	15.5011	269	1	15.5011	315	3	15.5011	301	1	15.5011	317	5	15.5011	303	1	15.5011	356	2	15.5011	306	1	15.5011	192	3	15.5011	202	2
15.5133	368	1	15.5133	336	4	15.5133	246	3	15.5133	253	4	15.5133	312	3	15.5133	319	3	15.5133	311	4	15.5133	298	2	15.5133	323	3	15.5133	308	2	15.5133	197	3	15.5133	203	1
15.5256	378	2	15.5256	322	3	15.5256	267	3	15.5256	279	0	15.5256	289	1	15.5256	279	1	15.5256	327	5	15.5256	310	3	15.5256	321	2	15.5256	308	4	15.5256	208	2	15.5256	202	3
15.5378	351	6	15.5378	330	7	15.5378	266	4	15.5378	276	2	15.5378	279	0	15.5378	290	4	15.5378	303	3	15.5378	351	4	15.5378	337	4	15.5378	335	2	15.5378	225	4	15.5378	194	1
15.55	318	0	15.55	339	2	15.55	255	1	15.55	262	2	15.55	317	2	15.55	303	5	15.55	282	4	15.55	357	2	15.55	318	1	15.55	315	1	15.55	214	2	15.55	201	4
15.5622	375	5	15.5622	342	4	15.5622	293	2	15.5622	286	6	15.5622	298	2	15.5622	277	1	15.5622	342	3	15.5622	326	3	15.5622	341	0	15.5622	310	1	15.5622	210	1	15.5622	224	1
15.5744	380	2	15.5744	350	2	15.5744	257	2	15.5744	259	1	15.5744	344	5	15.5744	306	0	15.5744	303	5	15.5744	279	6	15.5744	327	4	15.5744	311	1	15.5744	218	0	15.5744	218	4
15.5866	374	2	15.5866	332	2	15.5866	285	1	15.5866	275	1	15.5866	289	0	15.5866	295	1	15.5866	310	3	15.5866	306	0	15.5866	318	1	15.5866	352	5	15.5866	224	4	15.5866	188	2
15.5989	324	2	15.5989	327	3	15.5989	285	2	15.5989	249	3	15.5989	299	2	15.5989	290	2	15.5989	297	6	15.5989	293	2	15.5989	325	2	15.5989	340	7	15.5989	181	1	15.5989	231	3
15.6111	325	2	15.6111	326	4	15.6111	272	1	15.6111	267	4	15.6111	295	3	15.6111	315	4	15.6111	326	5	15.6111	326	3	15.6111	321	0	15.6111	302	2	15.6111	221	2	15.6111	212	1
15.6233	330	2	15.6233	309	4	15.6233	272	4	15.6233	269	3	15.6233	290	3	15.6233	280	3	15.6233	279	6	15.6233	302	0	15.6233	320	2	15.6233	317	1	15.6233	198	4	15.6233	187	1
15.6355	361	2	15.6355	313	4	15.6355	282	0	15.6355	244	2	15.6355	253	7	15.6355	305	1	15.6355	296	2	15.6355	318	6	15.6355	283	4	15.6355	279	2	15.6355	201	3	15.6355	192	2
15.6477	326	2	15.6477	291	4	15.6477	267	4	15.6477	254	2	15.6477	303	1	15.6477	276	0	15.6477	294	3	15.6477	317	1	15.6477	331	3	15.6477	299	4	15.6477	190	1	15.6477	194	4
15.6599	317	2	15.6599	303	3	15.6599	261	4	15.6599	279	6	15.6599	286	3	15.6599	273	2	15.6599	323	6	15.6599	293	1	15.6599	287	4	15.6599	296	2	15.6599	208	2	15.6599	186	4
15.6721	321	3	15.6721	305	2	15.6721	243	4	15.6721	245	3	15.6721	270	2	15.6721	293	4	15.6721	322	1	15.6721	296	4	15.6721	335	5	15.6721	327	1	15.6721	183	1	15.6721	216	2
15.6844	336	4	15.6844	296	2	15.6844	287	6	15.6844	248	4	15.6844	305	0	15.6844	305	1	15.6844	299	4	15.6844	318	1	15.6844	289	1	15.6844	274	3	15.6844	209	1	15.6844	171	1
15.6966	338	2	15.6966	317	2	15.6966	245	2	15.6966	261	3	15.6966	276	5	15.6966	310	1	15.6966	312	4	15.6966	355	4	15.6966	331	3	15.6966	300	0	15.6966	202	2	15.6966	203	1
15.7088	312	1	15.7088	320	0	15.7088	253	3	15.7088	245	1	15.7088	273	0	15.7088	261	2	15.7088	287	5	15.7088	322	3	15.7088	327	3	15.7088	301	4	15.7088	167	2	15.7088	189	3
15.721	339	4	15.721	321	0	15.721	250	3	15.721	233	2	15.721	309	2	15.721	247	4	15.721	283	2	15.721	299	5	15.721	294	1	15.721	351	4	15.721	198	1	15.721	202	4
15.7332	329	3	15.7332	344	1	15.7332	269	2	15.7332	270	2	15.7332	296	2	15.7332	250	2	15.7332	291	3	15.7332	317	2	15.7332	297	1	15.7332	275	2	15.7332	189	0	15.7332	198	2
15.7454	314	2	15.7454	301	3	15.7454	226	4	15.7454	252	2	15.7454	284	0	15.7454	290	3	15.7454	298	5	15.7454	279	3	15.7454	320	0	15.7454	309	3	15.7454	191	1	15.7454	181	3
15.7576	301	8	15.7576	313	4	15.7576	251	3	15.7576	258	2	15.7576	285	0	15.7576	282	3	15.7576	282	3	15.7576	312	2	15.7576	318	4	15.7576	335	0	15.7576	202	3	15.7576	210	3
15.7699	348	4	15.7699	288	1	15.7699	239	4	15.7699	257	6	15.7699	310	3	15.7699	288	1	15.7699	300	4	15.7699	329	0	15.7699	309	3	15.7699	334	1	15.7699	206	1	15.7699	200	0
15.7821	338	1	15.7821	321	2	15.7821	283	3	15.7821	248	4	15.7821	279	2	15.7821	245	1	15.7821	282	4	15.7821	300	2	15.7821	323	1	15.7821	283	1	15.7821	170	2	15.7821	204	2
15.7943	308	5	15.7943	312	1	15.7943	264	1	15.7943	258	2	15.7943	246	2	15.7943	264	3	15.7943	288	4	15.7943	334	1	15.7943	300	1	15.7943	294	5	15.7943	210	3	15.7943	190	4
15.8065	308	1	15.8065	276	1	15.8065	258	3	15.8065	216	5	15.8065	272	2	15.8065	285	4	15.8065	265	2	15.8065	281	5	15.8065	307	3	15.8065	255	2	15.8065	178	2	15.8065	171	1
15.8187	289	2	15.8187	292	1	15.8187	279	3	15.8187	255	4	15.8187	247	2	15.8187	233	3	15.8187	291	3	15.8187	290	4	15.8187	305	5	15.8187	276	3	15.8187	179	5	15.8187	191	1
15.8309	305	5	15.8309	325	3	15.8309	279	2	15.8309	206	3	15.8309	289	1	15.8309	292	1	15.8309	299	5	15.8309	284	2	15.8309	311	0	15.8309	307	2	15.8309	160	5	15.8309	154	5
15.8431	270	1	15.8431	309	4	15.8431	268	2	15.8431	232	7	15.8431	292	0	15.8431	249	5	15.8431	314	3	15.8431	311	2	15.8431	284	0	15.8431	311	1	15.8431	189	3	15.8431	167	1
15.8554	323	2	15.8554	312	1	15.8554	258	5	15.8554	258	2	15.8554	263	0	15.8554	287	1	15.8554	292	6	15.8554	320	0	15.8554	304	3	15.8554	269	3	15.8554	202	1	15.8554	183	2
15.8676	302	1	15.8676	331	1	15.8676	260	1	15.8676	243	1	15.8676	271	1	15.8676	263	1	15.8676	266	4	15.8676	291	4	15.8676	294	5	15.8676	289	1	15.8676	203	4	15.8676	168	4
15.8798	307	3	15.8798	285	0	15.8798	237	3	15.8798	229	1	15.8798	251	1	15.8798	312	2	15.8798	285	4	15.8798	291	2	15.8798	272	2	15.8798	287	2	15.8798	187	0	15.8798	177	0
15.892	343	5	15.892	318	3	15.892	250	5	15.892	240	3	15.892	277	4	15.892	295	2	15.892	307	7	15.892	287	2	15.892	288	4	15.892	306	2	15.892	207	2	15.892	201	1
15.9042	339	3	15.9042	306	1	15.9042	255	1	15.9042	234	4	15.9042	252	1	15.9042	246	4	15.9042	260	1	15.9042	286	2	15.9042	319	4	15.9042	296	3	15.9042	197	2	15.9042	169	4
15.9164	341	4	15.9164	283	0	15.9164	223	3	15.9164	237	1	15.9164	253	4	15.9164	266	1	15.9164	309	4	15.9164	279	3	15.9164	297	1	15.9164	272	4	15.9164	183	0	15.9164	183	2
15.9287	316	1	15.9287	306	2	15.9287	226	3	15.9287	241	1	15.9287	283	1	15.9287	264	2	15.9287	268	8	15.9287	327	1	15.9287	277	3	15.9287	245	1	15.9287	157	3	15.9287	167	2
15.9409	321	2	15.9409	288	2	15.9409	232	3	15.9409	237	1	15.9409	246	2	15.9409	266	2	15.9409	283	7	15.9409	296	2	15.9409	288	3	15.9409	304	0	15.9409	185	4	15.9409	190	6
15.9531	291	4	15.9531	285	5	15.9531	241	3	15.9531	221	2	15.9531	257	5	15.9531	267	4	15.9531	275	2	15.9531	269	3	15.9531	273	1	15.9531	300	3	15.9531	214	1	15.9531	175	1
15.9653	280	5	15.9653	307	2	15.9653	237	2	15.9653	255	0	15.9653	259	2	15.9653	244	6	15.9653	263	5	15.9653	250	2	15.9653	262	5	15.9653	293	3	15.9653	186	1	15.9653	163	7
15.9775	293	7	15.9775	307	4	15.9775	243	1	15.9775	241	3	15.9775	243	1	15.9775	236	1	15.9775	266	5	15.9775	290	5	15.9775	285	1	15.9775	288	1	15.9775	181	8	15.9775	166	4
15.9897	280	1	15.9897	256	2	15.9897	255	4	15.9897	243	2	15.9897	278	0	15.9897	272	1	15.9897	260	2	15.9897	274	0	15.9897	277	2	15.9897	273	1	15.9897	177	3	15.9897	169	1
16.002	286	5	16.002	314	0	16.002	269	2	16.002	234	1	16.002	267	5	16.002	246	2	16.002	269	4	16.002	279	1	16.002	281	3	16.002	274	2	16.002	168	3	16.002	181	0
16.0142	301	3	16.0142	278	2	16.0142	246	2	16.0142	243	1	16.0142	275	3	16.0142	246	0	16.0142	292	3	16.0142	281	4	16.0142	303	3	16.0142	275	2	16.0142	186	2	16.0142	191	5
16.0264	288	4	16.0264	304	2	16.0264	241	2	16.0264	236	2	16.0264	241	3	16.0264	251	2	16.0264	282	4	16.0264	273	2	16.0264	297	5	16.0264	282	3	16.0264	185	2	16.0264	172	0
16.0386	294	2	16.0386	285	5	16.0386	256	5	16.0386	217	2	16.0386	300	1	16.0386	230	0	16.0386	273	4	16.0386	278	2	16.0386	269	2	16.0386	274	1	16.0386	180	1	16.0386	189	2
16.0508	267	1	16.0508	314	0	16.0508	246	0	16.0508	246	2	16.0508	274	2	16.0508	264	1	16.0508	275	4	16.0508	287	4	16.0508	270	2	16.0508	252	6	16.0508	188	2	16.0508	157	4
16.063	268	6	16.063	292	2	16.063	235	3	16.063	245	5	16.063	274	4	16.063	294	0	16.063	278	5	16.063	276	4	16.063	291	1	16.063	274	5	16.063	161	3	16.063	184	3
16.0752	295	3	16.0752	283	5	16.0752	228	5	16.0752	242	3	16.0752	266	0	16.0752	245	1	16.0752	274	3	16.0752	267	3	16.0752	283	2	16.0752	275	3	16.0752	179	2	16.0752	175	2
16.0875	306	1	16.0875	269	2	16.0875	266	2	16.0875	243	3	16.0875	290	1	16.0875	260	1	16.0875	279	4	16.0875	299	4	16.0875	284	2	16.0875	280	1	16.0875	185	3	16.0875	187	2
16.0997	291	5	16.0997	282	1	16.0997	220	1	16.0997	241	2	16.0997	240	3	16.0997	256	1	16.0997	285	5	16.0997	272	3	16.0997	267	3	16.0997	294	1	16.0997	185	5	16.0997	161	0
16.1119	321	2	16.1119	284	0	16.1119	226	0	16.1119	201	4	16.1119	247	1	16.1119	235	1	16.1119	319	5	16.1119	285	3	16.1119	283	4	16.1119	236	3	16.1119	187	3	16.1119	211	2
16.1241	321	1	16.1241	267	3	16.1241	231	1	16.1241	232	3	16.1241	240	4	16.1241	282	2	16.1241	280	7	16.1241	249	1	16.1241	282	4	16.1241	295	4	16.1241	179	1	16.1241	173	1
16.1363	261	2	16.1363	294	2	16.1363	220	3	16.1363	221	5	16.1363	273	2	16.1363	270	4	16.1363	290	3	16.1363	279	5	16.1363	261	4	16.1363	268	4	16.1363	171	1	16.1363	161	2
16.1485	292	4	16.1485	300	1	16.1485	223	1	16.1485	203	1	16.1485	288	2	16.1485	223	1	16.1485	260	6	16.1485	282	3	16.1485	276	4	16.1485	288	1	16.1485	191	0	16.1485	150	3
16.1608	292	6	16.1608	299	3	16.1608	233	3	16.1608	243	4	16.1608	263	1	16.1608	281	1	16.1608	238	2	16.1608	266	2	16.1608	287	2	16.1608	266	2	16.1608	204	2	16.1608	183	2
16.173	310	1	16.173	261	3	16.173	222	2	16.173	229	2	16.173	262	3	16.173	229	2	16.173	271	5	16.173	272	2	16.173	272	0	16.173	240	4	16.173	173	1	16.173	182	0
16.1852	280	3	16.1852	279	3	16.1852	228	4	16.1852	237	3	16.1852	253	1	16.1852	243	3	16.1852	267	6	16.1852	261	1	16.1852	277	1	16.1852	259	2	16.1852	170	3	16.1852	166	4
16.1974	292	0	16.1974	273	4	16.1974	210	3	16.1974	208	2	16.1974	221	1	16.1974	283	6	16.1974	212	5	16.1974	305	2	16.1974	298	1	16.1974	272	5	16.1974	150	0	16.1974	144	1
16.2096	263	6	16.2096	284	3	16.2096	194	1	16.2096	243	3	16.2096	264	1	16.2096	239	2	16.2096	252	3	16.2096	287	2	16.2096	242	9	16.2096	276	2	16.2096	159	2	16.2096	159	4
16.2218	321	0	16.2218	262	1	16.2218	241	2	16.2218	230	0	16.2218	225	1	16.2218	284	4	16.2218	248	8	16.2218	259	2	16.2218	291	2	16.2218	251	3	16.2218	178	2	16.2218	180	0
16.234	293	3	16.234	246	3	16.234	228	1	16.234	209	1	16.234	216	3	16.234	232	5	16.234	264	6	16.234	241	0	16.234	296	0	16.234	258	1	16.234	170	1	16.234	175	2
16.2462	242	3	16.2462	239	2	16.2462	215	3	16.2462	185	5	16.2462	261	1	16.2462	266	1	16.2462	266	3	16.2462	275	0	16.2462	267	2	16.2462	256	2	16.2462	149	0	16.2462	170	1
16.2585	280	4	16.2585	251	2	16.2585	235	3	16.2585	237	4	16.2585	264	1	16.2585	233	1	16.2585	274	5	16.2585	275	2	16.2585	297	0	16.2585	264	1	16.2585	158	1	16.2585	168	2
16.2707	276	2	16.2707	261	1	16.2707	236	3	16.2707	241	1	16.2707	236	1	16.2707	250	4	16.2707	290	3	16.2707	266	1	16.2707	261	1	16.2707	253	2	16.2707	167	2	16.2707	155	2
16.2829	265	0	16.2829	279	3	16.2829	216	1	16.2829	211	2	16.2829	259	5	16.2829	238	2	16.2829	277	4	16.2829	231	3	16.2829	265	1	16.2829	246	1	16.2829	152	2	16.2829	175	2
16.2951	295	1	16.2951	259	0	16.2951	217	5	16.2951	236	1	16.2951	230	3	16.2951	261	2	16.2951	263	2	16.2951	265	5	16.2951	288	1	16.2951	242	2	16.2951	190	2	16.2951	168	0
16.3073	261	3	16.3073	266	2	16.3073	223	3	16.3073	212	3	16.3073	244	1	16.3073	259	3	16.3073	243	4	16.3073	262	7	16.3073	246	0	16.3073	276	1	16.3073	164	0	16.3073	147	1
16.3195	251	1	16.3195	267	2	16.3195	201	2	16.3195	214	4	16.3195	226	2	16.3195	264	3	16.3195	264	3	16.3195	235	7	16.3195	247	3	16.3195	249	2	16.3195	175	1	16.3195	171	0
16.3318	273	2	16.3318	268	2	16.3318	211	5	16.3318	195	1	16.3318	222	1	16.3318	237	1	16.3318	249	4	16.3318	272	1	16.3318	262	1	16.3318	265	3	16.3318	166	3	16.3318	160	2
16.344	301	3	16.344	276	0	16.344	245	4	16.344	230	4	16.344	248	2	16.344	255	2	16.344	259	3	16.344	300	2	16.344	264	2	16.344	254	3	16.344	180	2	16.344	170	1
16.3562	273	3	16.3562	236	4	16.3562	223	6	16.3562	219	3	16.3562	240	3	16.3562	250	0	16.3562	221	2	16.3562	255	1	16.3562	288	2	16.3562	243	1	16.3562	165	0	16.3562	166	1
16.3684	270	4	16.3684	285	1	16.3684	225	3	16.3684	216	4	16.3684	258	1	16.3684	235	1	16.3684	283	6	16.3684	263	4	16.3684	259	1	16.3684	259	0	16.3684	146	2	16.3684	166	5
16.3806	272	0	16.3806	265	3	16.3806	209	1	16.3806	210	2	16.3806	240	2	16.3806	224	1	16.3806	236	5	16.3806	262	1	16.3806	231	1	16.3806	248	1	16.3806	139	2	16.3806	168	3
16.3928	283	0	16.3928	257	1	16.3928	190	4	16.3928	190	1	16.3928	226	1	16.3928	237	3	16.3928	269	2	16.3928	253	3	16.3928	281	2	16.3928	245	2	16.3928	173	5	16.3928	160	3
16.405	259	0	16.405	267	3	16.405	190	0	16.405	230	0	16.405	218	3	16.405	228	1	16.405	248	2	16.405	276	4	16.405	261	3	16.405	241	3	16.405	180	0	16.405	157	3
16.4173	251	3	16.4173	245	3	16.4173	197	4	16.4173	204	2	16.4173	227	3	16.4173	231	2	16.4173	233	1	16.4173	237	2	16.4173	260	2	16.4173	256	1	16.4173	172	3	16.4173	165	3
16.4295	261	1	16.4295	247	0	16.4295	192	1	16.4295	205	1	16.4295	218	1	16.4295	243	2	16.4295	242	5	16.4295	252	1	16.4295	248	1	16.4295	250	2	16.4295	174	4	16.4295	179	4
16.4417	247	5	16.4417	242	2	16.4417	231	2	16.4417	188	2	16.4417	250	4	16.4417	220	1	16.4417	259	5	16.4417	231	0	16.4417	242	1	16.4417	265	2	16.4417	171	2	16.4417	171	2
16.4539	285	1	16.4539	237	3	16.4539	206	3	16.4539	192	2	16.4539	257	2	16.4539	216	0	16.4539	261	2	16.4539	225	0	16.4539	233	2	16.4539	250	0	16.4539	170	2	16.4539	157	0
16.4661	254	1	16.4661	283	1	16.4661	215	6	16.4661	217	1	16.4661	228	1	16.4661	220	3	16.4661	236	6	16.4661	229	1	16.4661	248	4	16.4661	249	4	16.4661	155	2	16.4661	129	0
16.4783	261	3	16.4783	256	4	16.4783	206	1	16.4783	223	4	16.4783	239	1	16.4783	218	0	16.4783	236	2	16.4783	250	1	16.4783	253	3	16.4783	231	7	16.4783	158	1	16.4783	167	1
16.4906	260	2	16.4906	264	2	16.4906	227	1	16.4906	218	2	16.4906	229	6	16.4906	210	0	16.4906	247	3	16.4906	230	2	16.4906	279	4	16.4906	222	3	16.4906	167	0	16.4906	151	3
16.5028	269	1	16.5028	242	1	16.5028	203	8	16.5028	216	3	16.5028	251	2	16.5028	244	2	16.5028	256	5	16.5028	252	3	16.5028	257	3	16.5028	239	2	16.5028	170	0	16.5028	144	5
16.515	287	3	16.515	242	2	16.515	178	1	16.515	213	4	16.515	226	2	16.515	239	2	16.515	241	4	16.515	239	4	16.515	261	2	16.515	256	1	16.515	166	1	16.515	129	2
16.5272	294	2	16.5272	263	2	16.5272	194	3	16.5272	198	2	16.5272	227	2	16.5272	234	2	16.5272	244	7	16.5272	223	2	16.5272	224	3	16.5272	242	1	16.5272	144	2	16.5272	158	4
16.5394	270	3	16.5394	258	1	16.5394	178	0	16.5394	199	5	16.5394	218	1	16.5394	217	2	16.5394	246	8	16.5394	218	2	16.5394	266	4	16.5394	237	2	16.5394	171	2	16.5394	158	0
16.5516	256	1	16.5516	228	3	16.5516	220	4	16.5516	171	1	16.5516	266	3	16.5516	226	2	16.5516	228	2	16.5516	234	2	16.5516	238	5	16.5516	238	1	16.5516	145	1	16.5516	142	3
16.5638	234	2	16.5638	269	3	16.5638	209	5	16.5638	197	3	16.5638	220	2	16.5638	241	2	16.5638	235	4	16.5638	270	4	16.5638	209	2	16.5638	221	3	16.5638	169	4	16.5638	135	1
16.5761	247	1	16.5761	239	3	16.5761	198	1	16.5761	194	2	16.5761	222	1	16.5761	198	5	16.5761	220	5	16.5761	257	1	16.5761	256	2	16.5761	264	0	16.5761	148	1	16.5761	158	0
16.5883	246	1	16.5883	251	1	16.5883	176	2	16.5883	197	3	16.5883	221	1	16.5883	239	2	16.5883	244	3	16.5883	275	3	16.5883	261	1	16.5883	234	3	16.5883	161	2	16.5883	157	2
16.6005	261	2	16.6005	249	6	16.6005	187	0	16.6005	195	3	16.6005	221	2	16.6005	233	2	16.6005	225	6	16.6005	235	2	16.6005	275	5	16.6005	238	3	16.6005	144	1	16.6005	148	1
16.6127	240	0	16.6127	239	1	16.6127	195	1	16.6127	186	4	16.6127	214	1	16.6127	249	0	16.6127	219	1	16.6127	233	3	16.6127	241	3	16.6127	220	5	16.6127	151	2	16.6127	155	3
16.6249	258	2	16.6249	254	2	16.6249	180	1	16.6249	203	0	16.6249	206	2	16.6249	238	1	16.6249	239	4	16.6249	221	4	16.6249	238	2	16.6249	235	1	16.6249	137	0	16.6249	128	0
16.6371	259	3	16.6371	242	1	16.6371	198	2	16.6371	204	4	16.6371	209	2	16.6371	248	2	16.6371	251	5	16.6371	269	1	16.6371	236	0	16.6371	249	3	16.6371	150	0	16.6371	140	4
16.6494	247	3	16.6494	239	2	16.6494	191	1	16.6494	197	2	16.6494	211	3	16.6494	210	2	16.6494	216	4	16.6494	221	4	16.6494	256	0	16.6494	222	3	16.6494	155	4	16.6494	147	2
16.6616	256	3	16.6616	244	1	16.6616	194	5	16.6616	199	2	16.6616	183	2	16.6616	228	3	16.6616	201	7	16.6616	258	0	16.6616	224	0	16.6616	271	3	16.6616	156	5	16.6616	152	0
16.6738	240	2	16.6738	246	1	16.6738	196	3	16.6738	209	6	16.6738	207	3	16.6738	220	1	16.6738	238	6	16.6738	268	1	16.6738	242	5	16.6738	245	5	16.6738	149	3	16.6738	165	1
16.686	243	2	16.686	218	6	16.686	204	2	16.686	192	2	16.686	208	2	16.686	221	5	16.686	209	2	16.686	228	4	16.686	254	1	16.686	230	1	16.686	149	4	16.686	161	1
16.6982	265	1	16.6982	222	2	16.6982	204	4	16.6982	194	3	16.6982	207	1	16.6982	200	1	16.6982	226	2	16.6982	235	2	16.6982	267	2	16.6982	221	0	16.6982	158	2	16.6982	149	0
16.7104	272	2	16.7104	246	2	16.7104	181	3	16.7104	179	3	16.7104	224	3	16.7104	249	1	16.7104	211	2	16.7104	242	1	16.7104	228	1	16.7104	241	2	16.7104	171	3	16.7104	141	1
16.7227	265	3	16.7227	272	2	16.7227	221	2	16.7227	195	2	16.7227	217	1	16.7227	216	2	16.7227	253	6	16.7227	248	5	16.7227	244	3	16.7227	251	2	16.7227	167	4	16.7227	138	3
16.7349	255	1	16.7349	259	4	16.7349	179	0	16.7349	183	3	16.7349	233	0	16.7349	228	3	16.7349	215	3	16.7349	224	4	16.7349	260	4	16.7349	239	2	16.7349	133	1	16.7349	152	2
16.7471	259	4	16.7471	243	5	16.7471	210	1	16.7471	210	2	16.7471	207	5	16.7471	221	1	16.7471	239	3	16.7471	242	0	16.7471	228	1	16.7471	243	0	16.7471	126	2	16.7471	158	2
16.7593	241	1	16.7593	254	4	16.7593	190	2	16.7593	203	2	16.7593	200	1	16.7593	200	1	16.7593	214	4	16.7593	247	3	16.7593	216	1	16.7593	209	1	16.7593	146	2	16.7593	116	3
16.7715	251	2	16.7715	232	3	16.7715	206	3	16.7715	196	4	16.7715	231	1	16.7715	198	1	16.7715	240	2	16.7715	263	2	16.7715	233	2	16.7715	220	2	16.7715	147	1	16.7715	130	4
16.7837	257	3	16.7837	247	4	16.7837	211	2	16.7837	170	1	16.7837	217	2	16.7837	223	2	16.7837	214	2	16.7837	252	2	16.7837	234	4	16.7837	225	1	16.7837	130	2	16.7837	154	1
16.7959	248	1	16.7959	231	1	16.7959	189	3	16.7959	216	2	16.7959	215	1	16.7959	214	2	16.7959	241	3	16.7959	217	2	16.7959	249	5	16.7959	206	3	16.7959	136	1	16.7959	143	2
16.8082	260	0	16.8082	236	3	16.8082	211	3	16.8082	172	2	16.8082	217	2	16.8082	219	3	16.8082	227	5	16.8082	208	3	16.8082	228	1	16.8082	221	1	16.8082	158	0	16.8082	128	2
16.8204	255	0	16.8204	250	1	16.8204	196	4	16.8204	186	1	16.8204	223	2	16.8204	195	2	16.8204	231	4	16.8204	240	4	16.8204	226	3	16.8204	218	3	16.8204	141	4	16.8204	155	2
16.8326	219	1	16.8326	267	3	16.8326	192	1	16.8326	183	6	16.8326	238	2	16.8326	224	1	16.8326	223	2	16.8326	257	3	16.8326	239	1	16.8326	226	4	16.8326	135	5	16.8326	120	1
16.8448	242	1	16.8448	217	1	16.8448	184	3	16.8448	180	3	16.8448	187	2	16.8448	221	1	16.8448	241	5	16.8448	215	1	16.8448	240	5	16.8448	219	2	16.8448	148	3	16.8448	165	2
16.857	251	3	16.857	220	1	16.857	222	1	16.857	174	3	16.857	223	4	16.857	206	0	16.857	216	5	16.857	204	5	16.857	209	2	16.857	212	4	16.857	129	3	16.857	144	2
16.8692	230	2	16.8692	224	0	16.8692	198	3	16.8692	179	0	16.8692	213	2	16.8692	178	1	16.8692	220	4	16.8692	193	2	16.8692	226	5	16.8692	198	2	16.8692	127	3	16.8692	149	1
16.8814	237	5	16.8814	243	4	16.8814	176	3	16.8814	179	1	16.8814	206	1	16.8814	178	2	16.8814	217	4	16.8814	220	3	16.8814	231	1	16.8814	211	3	16.8814	121	2	16.8814	157	5
16.8937	253	3	16.8937	248	2	16.8937	209	1	16.8937	196	1	16.8937	215	1	16.8937	225	3	16.8937	205	0	16.8937	238	3	16.8937	190	1	16.8937	251	2	16.8937	156	1	16.8937	142	4
16.9059	248	2	16.9059	233	1	16.9059	185	5	16.9059	175	5	16.9059	220	2	16.9059	213	1	16.9059	207	2	16.9059	234	4	16.9059	219	2	16.9059	188	2	16.9059	125	1	16.9059	137	0
16.9181	243	4	16.9181	228	0	16.9181	197	1	16.9181	174	0	16.9181	219	2	16.9181	223	0	16.9181	214	6	16.9181	234	1	16.9181	239	2	16.9181	242	2	16.9181	136	2	16.9181	165	1
16.9303	222	4	16.9303	224	3	16.9303	189	2	16.9303	218	2	16.9303	212	3	16.9303	235	1	16.9303	196	0	16.9303	221	4	16.9303	231	5	16.9303	214	2	16.9303	140	1	16.9303	129	1
16.9425	194	3	16.9425	235	1	16.9425	163	1	16.9425	163	2	16.9425	204	5	16.9425	189	2	16.9425	223	4	16.9425	213	1	16.9425	201	2	16.9425	255	0	16.9425	128	4	16.9425	153	0
16.9547	229	3	16.9547	220	2	16.9547	151	3	16.9547	168	4	16.9547	193	4	16.9547	224	4	16.9547	222	1	16.9547	213	2	16.9547	230	5	16.9547	220	1	16.9547	159	4	16.9547	155	0
16.967	232	2	16.967	257	2	16.967	170	6	16.967	172	3	16.967	195	0	16.967	192	1	16.967	202	5	16.967	208	2	16.967	203	4	16.967	207	2	16.967	147	3	16.967	144	2
16.9792	204	4	16.9792	228	3	16.9792	167	0	16.9792	186	5	16.9792	230	3	16.9792	217	0	16.9792	204	5	16.9792	213	2	16.9792	216	3	16.9792	225	4	16.9792	130	1	16.9792	120	0
16.9914	251	0	16.9914	223	7	16.9914	189	2	16.9914	181	3	16.9914	182	5	16.9914	228	2	16.9914	203	3	16.9914	215	2	16.9914	214	5	16.9914	205	4	16.9914	148	1	16.9914	152	1
17.0036	201	4	17.0036	232	3	17.0036	158	3	17.0036	168	2	17.0036	210	3	17.0036	224	0	17.0036	181	1	17.0036	212	2	17.0036	214	3	17.0036	219	3	17.0036	144	0	17.0036	136	1
17.0158	215	3	17.0158	241	4	17.0158	175	1	17.0158	187	2	17.0158	229	3	17.0158	216	1	17.0158	205	3	17.0158	182	0	17.0158	220	0	17.0158	210	0	17.0158	133	1	17.0158	129	2
17.028	229	4	17.028	205	0	17.028	161	3	17.028	185	1	17.028	216	5	17.028	179	6	17.028	205	2	17.028	193	4	17.028	227	6	17.028	202	4	17.028	136	3	17.028	117	3
17.0402	237	2	17.0402	223	1	17.0402	187	2	17.0402	192	4	17.0402	209	0	17.0402	190	0	17.0402	211	3	17.0402	190	2	17.0402	229	3	17.0402	229	0	17.0402	123	4	17.0402	127	2
17.0525	212	8	17.0525	221	2	17.0525	164	1	17.0525	180	1	17.0525	223	3	17.0525	186	1	17.0525	209	0	17.0525	202	2	17.0525	229	2	17.0525	234	3	17.0525	137	3	17.0525	146	6
17.0647	184	3	17.0647	230	3	17.0647	164	1	17.0647	195	4	17.0647	201	3	17.0647	182	1	17.0647	205	3	17.0647	223	0	17.0647	224	2	17.0647	237	2	17.0647	140	1	17.0647	121	0
17.0769	246	2	17.0769	212	1	17.0769	195	5	17.0769	192	0	17.0769	194	1	17.0769	197	1	17.0769	232	8	17.0769	202	3	17.0769	236	0	17.0769	197	2	17.0769	134	5	17.0769	124	0
17.0891	186	1	17.0891	205	0	17.0891	186	3	17.0891	167	2	17.0891	212	1	17.0891	209	5	17.0891	211	4	17.0891	212	2	17.0891	191	4	17.0891	192	4	17.0891	135	2	17.0891	115	2
17.1013	242	2	17.1013	233	5	17.1013	151	2	17.1013	184	2	17.1013	205	3	17.1013	229	1	17.1013	189	4	17.1013	213	4	17.1013	189	2	17.1013	210	3	17.1013	161	3	17.1013	127	2
17.1135	233	2	17.1135	215	2	17.1135	166	4	17.1135	196	3	17.1135	180	2	17.1135	194	0	17.1135	185	4	17.1135	200	1	17.1135	234	2	17.1135	226	1	17.1135	120	5	17.1135	120	2
17.1258	203	2	17.1258	219	4	17.1258	163	2	17.1258	171	3	17.1258	209	3	17.1258	189	0	17.1258	197	5	17.1258	181	1	17.1258	220	4	17.1258	212	2	17.1258	128	3	17.1258	141	2
17.138	213	5	17.138	201	2	17.138	174	0	17.138	173	0	17.138	222	3	17.138	213	2	17.138	209	5	17.138	211	2	17.138	212	1	17.138	221	1	17.138	111	5	17.138	140	0
17.1502	205	1	17.1502	210	1	17.1502	156	1	17.1502	143	1	17.1502	213	1	17.1502	196	4	17.1502	211	3	17.1502	194	0	17.1502	221	1	17.1502	220	3	17.1502	139	2	17.1502	133	0
17.1624	213	3	17.1624	209	3	17.1624	169	4	17.1624	178	3	17.1624	168	0	17.1624	212	0	17.1624	202	3	17.1624	189	4	17.1624	205	1	17.1624	188	3	17.1624	144	5	17.1624	133	2
17.1746	221	6	17.1746	200	3	17.1746	182	2	17.1746	150	5	17.1746	178	1	17.1746	179	2	17.1746	167	4	17.1746	205	1	17.1746	221	1	17.1746	222	3	17.1746	154	0	17.1746	126	1
17.1868	232	1	17.1868	233	1	17.1868	170	2	17.1868	167	1	17.1868	182	1	17.1868	212	1	17.1868	235	2	17.1868	214	0	17.1868	219	1	17.1868	212	1	17.1868	134	1	17.1868	131	1
17.199	234	3	17.199	222	3	17.199	197	2	17.199	175	2	17.199	189	4	17.199	193	5	17.199	199	2	17.199	216	3	17.199	217	1	17.199	212	4	17.199	110	4	17.199	145	2
17.2113	216	1	17.2113	207	4	17.2113	189	1	17.2113	162	2	17.2113	197	3	17.2113	204	3	17.2113	214	5	17.2113	201	0	17.2113	201	3	17.2113	229	4	17.2113	125	3	17.2113	134	1
17.2235	209	1	17.2235	220	3	17.2235	177	3	17.2235	164	3	17.2235	180	3	17.2235	187	4	17.2235	170	3	17.2235	194	2	17.2235	215	2	17.2235	184	3	17.2235	97	4	17.2235	132	4
17.2357	220	3	17.2357	217	1	17.2357	186	0	17.2357	149	4	17.2357	200	3	17.2357	192	1	17.2357	210	1	17.2357	224	2	17.2357	222	4	17.2357	210	2	17.2357	120	3	17.2357	138	2
17.2479	220	2	17.2479	199	0	17.2479	140	2	17.2479	177	3	17.2479	194	3	17.2479	178	1	17.2479	190	4	17.2479	208	3	17.2479	192	1	17.2479	221	0	17.2479	117	1	17.2479	142	0
17.2601	207	4	17.2601	215	2	17.2601	182	1	17.2601	163	2	17.2601	186	4	17.2601	194	3	17.2601	197	5	17.2601	213	6	17.2601	222	3	17.2601	202	3	17.2601	156	1	17.2601	119	1
17.2723	214	4	17.2723	168	2	17.2723	182	5	17.2723	197	6	17.2723	212	2	17.2723	191	2	17.2723	176	2	17.2723	205	2	17.2723	202	1	17.2723	202	4	17.2723	129	1	17.2723	132	4
17.2845	205	2	17.2845	200	1	17.2845	173	2	17.2845	145	2	17.2845	181	2	17.2845	189	2	17.2845	208	2	17.2845	206	3	17.2845	203	3	17.2845	193	3	17.2845	135	3	17.2845	116	0
17.2968	219	3	17.2968	227	3	17.2968	173	5	17.2968	167	1	17.2968	177	0	17.2968	206	2	17.2968	207	5	17.2968	204	2	17.2968	214	5	17.2968	210	1	17.2968	141	4	17.2968	142	2
17.309	216	0	17.309	222	4	17.309	191	3	17.309	143	2	17.309	185	2	17.309	214	1	17.309	208	0	17.309	207	3	17.309	209	3	17.309	200	3	17.309	130	4	17.309	128	2
17.3212	205	2	17.3212	220	1	17.3212	175	1	17.3212	168	2	17.3212	194	3	17.3212	205	1	17.3212	195	3	17.3212	204	4	17.3212	174	4	17.3212	192	1	17.3212	128	1	17.3212	108	0
17.3334	204	2	17.3334	235	4	17.3334	174	6	17.3334	177	4	17.3334	177	4	17.3334	170	1	17.3334	210	8	17.3334	203	3	17.3334	218	4	17.3334	219	3	17.3334	120	0	17.3334	133	1
17.3456	186	1	17.3456	187	2	17.3456	154	4	17.3456	148	2	17.3456	215	3	17.3456	165	1	17.3456	185	1	17.3456	205	3	17.3456	223	4	17.3456	191	2	17.3456	141	3	17.3456	102	2
17.3578	212	0	17.3578	199	1	17.3578	167	2	17.3578	171	4	17.3578	204	3	17.3578	181	2	17.3578	183	7	17.3578	185	1	17.3578	181	2	17.3578	185	3	17.3578	121	4	17.3578	121	1
17.37	206	0	17.37	205	6	17.37	163	1	17.37	163	2	17.37	187	4	17.37	170	2	17.37	191	1	17.37	165	1	17.37	182	2	17.37	184	1	17.37	132	3	17.37	109	2
17.3823	211	3	17.3823	197	1	17.3823	168	4	17.3823	164	4	17.3823	174	2	17.3823	170	3	17.3823	188	1	17.3823	189	3	17.3823	193	1	17.3823	197	2	17.3823	125	1	17.3823	127	1
17.3945	208	2	17.3945	208	2	17.3945	153	2	17.3945	174	1	17.3945	189	2	17.3945	179	3	17.3945	173	1	17.3945	206	2	17.3945	236	2	17.3945	182	2	17.3945	127	2	17.3945	125	4
17.4067	223	1	17.4067	211	1	17.4067	168	1	17.4067	168	2	17.4067	176	3	17.4067	168	2	17.4067	162	6	17.4067	210	2	17.4067	194	0	17.4067	210	1	17.4067	130	4	17.4067	117	3
17.4189	200	8	17.4189	174	5	17.4189	151	1	17.4189	193	2	17.4189	165	1	17.4189	171	6	17.4189	219	5	17.4189	195	1	17.4189	208	4	17.4189	196	3	17.4189	136	1	17.4189	133	4
17.4311	226	3	17.4311	198	4	17.4311	153	1	17.4311	157	2	17.4311	171	0	17.4311	164	4	17.4311	182	3	17.4311	204	2	17.4311	213	4	17.4311	186	2	17.4311	121	1	17.4311	110	0
17.4433	217	1	17.4433	186	2	17.4433	160	2	17.4433	145	4	17.4433	166	3	17.4433	167	4	17.4433	185	3	17.4433	197	1	17.4433	200	1	17.4433	196	1	17.4433	119	3	17.4433	113	2
17.4556	197	3	17.4556	205	2	17.4556	163	2	17.4556	167	3	17.4556	182	2	17.4556	186	4	17.4556	184	4	17.4556	181	3	17.4556	208	1	17.4556	202	2	17.4556	117	1	17.4556	101	4
17.4678	194	0	17.4678	189	2	17.4678	167	0	17.4678	155	3	17.4678	149	1	17.4678	176	2	17.4678	171	3	17.4678	188	1	17.4678	204	4	17.4678	197	0	17.4678	134	0	17.4678	119	0
17.48	218	5	17.48	197	3	17.48	154	4	17.48	151	1	17.48	158	4	17.48	179	2	17.48	185	5	17.48	186	3	17.48	198	1	17.48	196	2	17.48	120	1	17.48	113	1
17.4922	190	2	17.4922	173	1	17.4922	172	0	17.4922	146	4	17.4922	174	1	17.4922	162	3	17.4922	181	3	17.4922	204	0	17.4922	197	2	17.4922	181	6	17.4922	129	0	17.4922	123	3
17.5044	188	2	17.5044	210	2	17.5044	164	3	17.5044	142	5	17.5044	157	1	17.5044	154	0	17.5044	196	2	17.5044	177	2	17.5044	209	6	17.5044	191	3	17.5044	116	3	17.5044	110	6
17.5166	215	5	17.5166	184	3	17.5166	148	5	17.5166	161	1	17.5166	165	1	17.5166	167	0	17.5166	176	3	17.5166	183	2	17.5166	187	3	17.5166	170	1	17.5166	129	1	17.5166	107	1
17.5288	205	3	17.5288	217	1	17.5288	170	3	17.5288	152	3	17.5288	172	2	17.5288	179	0	17.5288	191	6	17.5288	177	2	17.5288	190	0	17.5288	177	2	17.5288	101	0	17.5288	102	2
17.5411	182	3	17.5411	190	3	17.5411	142	6	17.5411	173	2	17.5411	169	4	17.5411	168	1	17.5411	180	7	17.5411	197	4	17.5411	184	1	17.5411	177	3	17.5411	114	3	17.5411	101	2
17.5533	236	4	17.5533	218	0	17.5533	164	4	17.5533	180	4	17.5533	170	1	17.5533	167	4	17.5533	195	1	17.5533	193	3	17.5533	203	4	17.5533	184	2	17.5533	109	1	17.5533	122	1
17.5655	219	3	17.5655	198	3	17.5655	154	3	17.5655	122	2	17.5655	148	3	17.5655	183	0	17.5655	183	2	17.5655	172	1	17.5655	206	7	17.5655	193	4	17.5655	108	2	17.5655	122	1
17.5777	204	1	17.5777	188	1	17.5777	157	3	17.5777	172	2	17.5777	165	2	17.5777	180	2	17.5777	168	5	17.5777	176	1	17.5777	213	4	17.5777	219	0	17.5777	103	3	17.5777	107	2
17.5899	182	3	17.5899	201	2	17.5899	158	5	17.5899	158	2	17.5899	186	2	17.5899	174	2	17.5899	170	2	17.5899	165	3	17.5899	186	0	17.5899	198	1	17.5899	121	0	17.5899	112	3
17.6021	206	1	17.6021	208	3	17.6021	145	2	17.6021	150	6	17.6021	174	0	17.6021	174	0	17.6021	168	2	17.6021	192	2	17.6021	206	0	17.6021	173	2	17.6021	109	3	17.6021	114	1
17.6144	190	3	17.6144	196	2	17.6144	154	1	17.6144	146	1	17.6144	180	2	17.6144	180	3	17.6144	190	3	17.6144	176	2	17.6144	201	0	17.6144	191	3	17.6144	118	3	17.6144	112	3
17.6266	213	3	17.6266	221	1	17.6266	164	2	17.6266	145	3	17.6266	180	3	17.6266	196	1	17.6266	165	4	17.6266	193	0	17.6266	185	1	17.6266	181	6	17.6266	120	4	17.6266	119	1
17.6388	196	3	17.6388	205	4	17.6388	158	5	17.6388	153	3	17.6388	179	1	17.6388	157	2	17.6388	186	2	17.6388	190	2	17.6388	195	1	17.6388	183	2	17.6388	128	1	17.6388	107	4
17.651	186	3	17.651	217	1	17.651	154	2	17.651	143	3	17.651	164	3	17.651	167	2	17.651	186	4	17.651	199	3	17.651	175	1	17.651	167	1	17.651	108	1	17.651	134	3
17.6632	191	1	17.6632	213	2	17.6632	155	3	17.6632	136	3	17.6632	162	3	17.6632	155	2	17.6632	162	4	17.6632	198	2	17.6632	184	2	17.6632	183	3	17.6632	107	3	17.6632	104	2
17.6754	227	2	17.6754	172	2	17.6754	141	5	17.6754	147	1	17.6754	168	0	17.6754	167	3	17.6754	174	3	17.6754	159	1	17.6754	182	0	17.6754	181	4	17.6754	98	4	17.6754	106	4
17.6877	187	1	17.6877	168	1	17.6877	151	1	17.6877	152	1	17.6877	189	0	17.6877	165	2	17.6877	174	5	17.6877	190	4	17.6877	182	3	17.6877	188	1	17.6877	136	2	17.6877	122	2
17.6999	186	4	17.6999	173	2	17.6999	151	2	17.6999	132	2	17.6999	179	3	17.6999	165	2	17.6999	174	2	17.6999	164	5	17.6999	199	1	17.6999	153	0	17.6999	114	2	17.6999	108	0
17.7121	201	2	17.7121	189	0	17.7121	133	2	17.7121	148	2	17.7121	179	2	17.7121	158	0	17.7121	156	2	17.7121	177	2	17.7121	176	1	17.7121	198	5	17.7121	129	1	17.7121	115	2
17.7243	227	4	17.7243	176	2	17.7243	155	5	17.7243	146	1	17.7243	187	2	17.7243	172	1	17.7243	188	3	17.7243	170	2	17.7243	194	2	17.7243	194	3	17.7243	102	1	17.7243	104	3
17.7365	178	1	17.7365	192	1	17.7365	143	4	17.7365	142	0	17.7365	165	3	17.7365	175	0	17.7365	169	5	17.7365	158	3	17.7365	195	2	17.7365	162	1	17.7365	107	5	17.7365	84	1
17.7487	183	3	17.7487	160	3	17.7487	140	0	17.7487	119	3	17.7487	178	3	17.7487	154	4	17.7487	180	3	17.7487	170	3	17.7487	164	1	17.7487	175	3	17.7487	85	1	17.7487	96	2
17.7609	164	0	17.7609	172	1	17.7609	158	2	17.7609	141	2	17.7609	145	4	17.7609	153	3	17.7609	151	0	17.7609	187	2	17.7609	182	3	17.7609	144	0	17.7609	109	3	17.7609	125	2
17.7732	197	1	17.7732	185	6	17.7732	150	4	17.7732	151	1	17.7732	171	4	17.7732	208	2	17.7732	176	7	17.7732	174	1	17.7732	185	0	17.7732	166	0	17.7732	97	2	17.7732	111	0
17.7854	194	1	17.7854	168	1	17.7854	153	1	17.7854	122	3	17.7854	142	1	17.7854	145	4	17.7854	170	4	17.7854	185	0	17.7854	166	1	17.7854	169	1	17.7854	107	0	17.7854	108	1
17.7976	192	3	17.7976	183	4	17.7976	135	6	17.7976	142	1	17.7976	159	1	17.7976	162	3	17.7976	171	1	17.7976	158	2	17.7976	194	4	17.7976	158	2	17.7976	107	2	17.7976	113	1
17.8098	164	3	17.8098	174	4	17.8098	130	3	17.8098	146	0	17.8098	168	4	17.8098	180	1	17.8098	178	3	17.8098	171	1	17.8098	192	1	17.8098	188	1	17.8098	104	3	17.8098	96	3
17.822	208	3	17.822	186	0	17.822	166	1	17.822	120	3	17.822	154	2	17.822	171	1	17.822	160	3	17.822	187	2	17.822	182	2	17.822	168	4	17.822	100	3	17.822	111	2
17.8342	179	4	17.8342	171	0	17.8342	152	3	17.8342	120	3	17.8342	175	3	17.8342	194	1	17.8342	176	3	17.8342	167	2	17.8342	154	1	17.8342	184	2	17.8342	101	2	17.8342	119	0
17.8465	195	2	17.8465	172	2	17.8465	134	2	17.8465	133	2	17.8465	149	3	17.8465	168	4	17.8465	185	1	17.8465	143	1	17.8465	182	1	17.8465	187	4	17.8465	98	4	17.8465	121	1
17.8587	197	2	17.8587	201	1	17.8587	153	5	17.8587	155	6	17.8587	154	2	17.8587	162	5	17.8587	186	2	17.8587	167	6	17.8587	192	4	17.8587	158	4	17.8587	117	2	17.8587	115	1
17.8709	160	2	17.8709	185	1	17.8709	128	4	17.8709	128	1	17.8709	168	2	17.8709	156	2	17.8709	153	6	17.8709	182	2	17.8709	187	1	17.8709	181	2	17.8709	105	1	17.8709	109	0
17.8831	181	2	17.8831	162	1	17.8831	149	1	17.8831	139	4	17.8831	192	7	17.8831	166	1	17.8831	155	1	17.8831	164	0	17.8831	182	3	17.8831	172	5	17.8831	113	2	17.8831	97	4
17.8953	168	3	17.8953	159	2	17.8953	144	1	17.8953	143	6	17.8953	180	0	17.8953	154	3	17.8953	160	2	17.8953	155	1	17.8953	182	3	17.8953	146	2	17.8953	103	2	17.8953	101	2
17.9075	176	0	17.9075	198	4	17.9075	148	8	17.9075	142	2	17.9075	155	4	17.9075	170	3	17.9075	186	3	17.9075	169	2	17.9075	163	2	17.9075	158	3	17.9075	120	1	17.9075	91	2
17.9197	183	3	17.9197	180	2	17.9197	163	3	17.9197	125	1	17.9197	158	2	17.9197	176	2	17.9197	144	4	17.9197	177	1	17.9197	201	1	17.9197	151	6	17.9197	121	1	17.9197	105	2
17.932	202	6	17.932	170	3	17.932	128	5	17.932	136	4	17.932	164	2	17.932	152	3	17.932	144	7	17.932	168	2	17.932	175	2	17.932	200	5	17.932	88	3	17.932	105	5
17.9442	155	1	17.9442	163	5	17.9442	138	3	17.9442	120	5	17.9442	181	1	17.9442	176	5	17.9442	150	7	17.9442	170	1	17.9442	161	5	17.9442	171	2	17.9442	112	4	17.9442	105	4
17.9564	204	2	17.9564	167	3	17.9564	153	2	17.9564	153	4	17.9564	169	4	17.9564	175	1	17.9564	183	4	17.9564	188	0	17.9564	199	3	17.9564	178	0	17.9564	96	0	17.9564	106	4
17.9686	189	1	17.9686	190	2	17.9686	124	4	17.9686	140	4	17.9686	146	2	17.9686	148	5	17.9686	172	2	17.9686	176	4	17.9686	186	3	17.9686	187	2	17.9686	92	2	17.9686	109	5
17.9808	152	0	17.9808	187	0	17.9808	144	0	17.9808	143	3	17.9808	139	2	17.9808	153	0	17.9808	171	3	17.9808	177	3	17.9808	166	2	17.9808	179	4	17.9808	106	1	17.9808	120	2
17.993	215	3	17.993	194	3	17.993	131	2	17.993	155	2	17.993	176	1	17.993	147	2	17.993	191	8	17.993	169	2	17.993	168	2	17.993	181	2	17.993	93	1	17.993	96	5
18.0053	178	2	18.0053	165	0	18.0053	151	2	18.0053	131	1	18.0053	172	2	18.0053	151	2	18.0053	143	3	18.0053	169	1	18.0053	153	1	18.0053	170	2	18.0053	116	1	18.0053	108	2
18.0175	179	3	18.0175	172	2	18.0175	116	2	18.0175	136	4	18.0175	127	2	18.0175	176	1	18.0175	134	4	18.0175	185	1	18.0175	160	1	18.0175	147	2	18.0175	101	1	18.0175	79	0
18.0297	173	4	18.0297	176	0	18.0297	141	5	18.0297	140	1	18.0297	151	5	18.0297	177	6	18.0297	151	2	18.0297	162	1	18.0297	214	1	18.0297	162	3	18.0297	102	0	18.0297	108	2
18.0419	156	0	18.0419	180	3	18.0419	127	6	18.0419	172	0	18.0419	158	0	18.0419	149	2	18.0419	137	7	18.0419	172	4	18.0419	178	1	18.0419	165	3	18.0419	96	2	18.0419	95	5
18.0541	180	0	18.0541	175	3	18.0541	135	4	18.0541	121	2	18.0541	166	1	18.0541	151	3	18.0541	160	5	18.0541	176	1	18.0541	163	1	18.0541	169	4	18.0541	108	4	18.0541	107	1
18.0663	178	3	18.0663	167	2	18.0663	122	0	18.0663	119	0	18.0663	154	1	18.0663	165	2	18.0663	171	3	18.0663	139	5	18.0663	171	2	18.0663	150	2	18.0663	79	3	18.0663	107	2
18.0785	172	3	18.0785	175	2	18.0785	125	1	18.0785	124	2	18.0785	150	5	18.0785	147	3	18.0785	160	3	18.0785	162	3	18.0785	154	2	18.0785	150	6	18.0785	128	1	18.0785	87	2
18.0907	150	1	18.0907	159	1	18.0907	135	4	18.0907	137	2	18.0907	156	1	18.0907	175	2	18.0907	147	5	18.0907	167	3	18.0907	186	3	18.0907	156	3	18.0907	97	2	18.0907	89	2
18.103	159	1	18.103	176	1	18.103	124	4	18.103	131	1	18.103	138	2	18.103	160	3	18.103	117	2	18.103	159	5	18.103	168	3	18.103	173	6	18.103	109	1	18.103	86	1
18.1152	168	2	18.1152	172	0	18.1152	141	1	18.1152	105	2	18.1152	139	3	18.1152	153	3	18.1152	146	4	18.1152	155	3	18.1152	163	2	18.1152	176	3	18.1152	103	2	18.1152	92	2
18.1274	144	6	18.1274	183	2	18.1274	165	7	18.1274	125	3	18.1274	133	1	18.1274	140	1	18.1274	166	4	18.1274	169	2	18.1274	172	3	18.1274	152	2	18.1274	100	2	18.1274	90	1
18.1396	182	5	18.1396	176	2	18.1396	126	3	18.1396	138	3	18.1396	153	4	18.1396	147	3	18.1396	133	2	18.1396	139	2	18.1396	169	2	18.1396	139	2	18.1396	102	0	18.1396	98	2
18.1518	166	1	18.1518	174	1	18.1518	122	2	18.1518	123	2	18.1518	144	1	18.1518	140	0	18.1518	165	4	18.1518	169	2	18.1518	191	4	18.1518	163	1	18.1518	96	2	18.1518	89	4
18.164	161	3	18.164	156	2	18.164	126	3	18.164	127	1	18.164	156	1	18.164	129	0	18.164	134	3	18.164	129	1	18.164	181	2	18.164	142	4	18.164	120	1	18.164	101	4
18.1763	144	1	18.1763	178	1	18.1763	139	2	18.1763	131	3	18.1763	152	6	18.1763	173	1	18.1763	138	1	18.1763	168	1	18.1763	176	1	18.1763	159	4	18.1763	82	4	18.1763	92	2
18.1885	181	2	18.1885	187	1	18.1885	132	4	18.1885	124	2	18.1885	138	2	18.1885	153	2	18.1885	152	0	18.1885	161	3	18.1885	203	1	18.1885	161	2	18.1885	97	1	18.1885	104	2
18.2007	163	1	18.2007	155	7	18.2007	122	5	18.2007	132	3	18.2007	141	0	18.2007	160	1	18.2007	134	7	18.2007	153	3	18.2007	170	1	18.2007	189	2	18.2007	114	3	18.2007	108	2
18.2129	150	2	18.2129	158	1	18.2129	137	6	18.2129	116	2	18.2129	144	1	18.2129	152	3	18.2129	154	3	18.2129	161	2	18.2129	184	0	18.2129	170	3	18.2129	99	2	18.2129	98	4
18.2251	169	3	18.2251	168	3	18.2251	147	1	18.2251	118	5	18.2251	130	2	18.2251	153	2	18.2251	155	3	18.2251	140	3	18.2251	184	0	18.2251	156	2	18.2251	120	1	18.2251	103	3
18.2373	174	3	18.2373	156	6	18.2373	121	2	18.2373	122	2	18.2373	155	3	18.2373	183	4	18.2373	150	4	18.2373	152	6	18.2373	150	2	18.2373	163	3	18.2373	116	3	18.2373	95	2
18.2495	177	3	18.2495	171	1	18.2495	137	0	18.2495	110	2	18.2495	138	1	18.2495	143	0	18.2495	143	2	18.2495	169	2	18.2495	174	3	18.2495	148	1	18.2495	110	2	18.2495	88	5
18.2618	181	2	18.2618	166	3	18.2618	129	2	18.2618	123	2	18.2618	136	3	18.2618	153	4	18.2618	120	5	18.2618	144	1	18.2618	122	2	18.2618	154	4	18.2618	106	3	18.2618	92	3
18.274	148	2	18.274	157	3	18.274	122	1	18.274	123	3	18.274	153	0	18.274	158	0	18.274	145	8	18.274	153	1	18.274	170	4	18.274	140	2	18.274	84	2	18.274	116	4
18.2862	160	1	18.2862	175	4	18.2862	129	1	18.2862	121	1	18.2862	155	2	18.2862	152	2	18.2862	138	5	18.2862	159	1	18.2862	152	1	18.2862	142	7	18.2862	100	3	18.2862	106	1
18.2984	155	1	18.2984	174	1	18.2984	109	3	18.2984	123	3	18.2984	145	1	18.2984	136	2	18.2984	146	2	18.2984	142	3	18.2984	155	5	18.2984	132	0	18.2984	92	1	18.2984	81	7
18.3106	162	2	18.3106	150	2	18.3106	122	1	18.3106	130	0	18.3106	140	2	18.3106	149	1	18.3106	152	3	18.3106	139	3	18.3106	181	3	18.3106	161	4	18.3106	102	1	18.3106	104	1
18.3228	167	2	18.3228	159	7	18.3228	120	5	18.3228	135	1	18.3228	146	6	18.3228	150	1	18.3228	142	4	18.3228	144	2	18.3228	158	2	18.3228	165	3	18.3228	93	1	18.3228	98	1
18.3351	162	5	18.3351	167	1	18.3351	123	4	18.3351	119	1	18.3351	168	1	18.3351	150	3	18.3351	167	6	18.3351	142	3	18.3351	151	2	18.3351	132	5	18.3351	111	4	18.3351	91	1
18.3473	160	3	18.3473	155	4	18.3473	130	3	18.3473	113	4	18.3473	132	3	18.3473	141	1	18.3473	129	2	18.3473	149	0	18.3473	178	2	18.3473	178	4	18.3473	99	1	18.3473	94	2
18.3595	165	2	18.3595	161	1	18.3595	127	3	18.3595	122	3	18.3595	166	0	18.3595	118	2	18.3595	134	5	18.3595	173	6	18.3595	175	2	18.3595	173	1	18.3595	99	5	18.3595	81	1
18.3717	161	2	18.3717	158	0	18.3717	116	2	18.3717	123	3	18.3717	143	2	18.3717	125	2	18.3717	150	4	18.3717	136	2	18.3717	143	4	18.3717	153	1	18.3717	91	1	18.3717	80	3
18.3839	180	5	18.3839	162	3	18.3839	130	2	18.3839	126	1	18.3839	140	3	18.3839	141	1	18.3839	152	5	18.3839	111	0	18.3839	143	0	18.3839	154	2	18.3839	106	5	18.3839	101	2
18.3961	163	2	18.3961	151	2	18.3961	132	3	18.3961	106	3	18.3961	124	2	18.3961	124	3	18.3961	164	5	18.3961	150	1	18.3961	166	3	18.3961	157	6	18.3961	83	1	18.3961	112	2
18.4083	159	3	18.4083	156	1	18.4083	117	3	18.4083	126	3	18.4083	157	2	18.4083	140	2	18.4083	146	4	18.4083	137	1	18.4083	145	4	18.4083	146	5	18.4083	88	4	18.4083	92	2
18.4206	150	2	18.4206	174	1	18.4206	121	3	18.4206	122	2	18.4206	147	3	18.4206	141	4	18.4206	129	4	18.4206	130	1	18.4206	171	1	18.4206	137	3	18.4206	107	1	18.4206	98	0
18.4328	149	1	18.4328	167	2	18.4328	120	3	18.4328	145	1	18.4328	126	1	18.4328	125	2	18.4328	138	5	18.4328	164	0	18.4328	133	1	18.4328	137	2	18.4328	85	2	18.4328	94	3
18.445	173	3	18.445	178	1	18.445	136	2	18.445	119	0	18.445	161	1	18.445	127	3	18.445	132	3	18.445	139	6	18.445	164	2	18.445	152	3	18.445	98	5	18.445	90	4
18.4572	143	2	18.4572	161	1	18.4572	93	1	18.4572	113	2	18.4572	145	2	18.4572	124	2	18.4572	123	0	18.4572	139	3	18.4572	140	5	18.4572	157	2	18.4572	100	4	18.4572	109	1
18.4694	151	3	18.4694	155	2	18.4694	113	1	18.4694	111	3	18.4694	144	0	18.4694	143	0	18.4694	156	1	18.4694	146	3	18.4694	160	1	18.4694	147	1	18.4694	97	2	18.4694	80	0
18.4816	145	1	18.4816	164	3	18.4816	129	2	18.4816	97	2	18.4816	148	3	18.4816	131	1	18.4816	149	1	18.4816	140	0	18.4816	152	1	18.4816	152	1	18.4816	97	3	18.4816	91	3
18.4938	158	4	18.4938	151	3	18.4938	128	1	18.4938	111	1	18.4938	146	3	18.4938	147	1	18.4938	140	1	18.4938	151	1	18.4938	162	2	18.4938	130	3	18.4938	102	4	18.4938	91	1
18.5061	140	2	18.5061	169	4	18.5061	120	4	18.5061	110	2	18.5061	143	1	18.5061	133	2	18.5061	140	4	18.5061	147	2	18.5061	135	5	18.5061	150	3	18.5061	90	2	18.5061	95	3
18.5183	158	0	18.5183	163	1	18.5183	105	4	18.5183	119	2	18.5183	123	1	18.5183	132	3	18.5183	124	3	18.5183	140	1	18.5183	150	2	18.5183	167	2	18.5183	104	1	18.5183	82	4
18.5305	168	4	18.5305	169	1	18.5305	136	2	18.5305	108	4	18.5305	144	2	18.5305	118	1	18.5305	145	3	18.5305	139	1	18.5305	155	1	18.5305	152	3	18.5305	98	2	18.5305	89	4
18.5427	167	0	18.5427	157	2	18.5427	124	6	18.5427	115	2	18.5427	134	4	18.5427	131	0	18.5427	140	1	18.5427	131	1	18.5427	147	0	18.5427	146	3	18.5427	87	5	18.5427	77	0
18.5549	144	0	18.5549	160	2	18.5549	129	5	18.5549	99	3	18.5549	141	4	18.5549	94	0	18.5549	146	6	18.5549	133	1	18.5549	168	2	18.5549	148	3	18.5549	77	2	18.5549	82	1
18.5672	150	2	18.5672	150	1	18.5672	115	4	18.5672	136	2	18.5672	145	2	18.5672	132	0	18.5672	118	6	18.5672	137	4	18.5672	158	4	18.5672	143	3	18.5672	90	1	18.5672	89	2
18.5794	153	1	18.5794	131	4	18.5794	127	3	18.5794	104	2	18.5794	131	2	18.5794	138	3	18.5794	149	4	18.5794	144	0	18.5794	137	0	18.5794	163	3	18.5794	72	2	18.5794	84	4
18.5916	162	3	18.5916	146	4	18.5916	122	3	18.5916	124	2	18.5916	148	3	18.5916	137	0	18.5916	139	5	18.5916	165	3	18.5916	144	1	18.5916	140	1	18.5916	94	2	18.5916	93	2
18.6038	145	5	18.6038	124	3	18.6038	112	1	18.6038	122	1	18.6038	133	2	18.6038	141	1	18.6038	145	3	18.6038	127	1	18.6038	143	6	18.6038	153	3	18.6038	90	1	18.6038	88	2
18.616	176	2	18.616	168	2	18.616	125	2	18.616	111	3	18.616	132	5	18.616	149	2	18.616	142	4	18.616	141	3	18.616	162	1	18.616	132	2	18.616	84	2	18.616	91	2
18.6282	157	2	18.6282	158	1	18.6282	101	5	18.6282	111	2	18.6282	154	9	18.6282	157	4	18.6282	128	1	18.6282	143	1	18.6282	160	5	18.6282	139	1	18.6282	91	3	18.6282	104	1
18.6404	165	1	18.6404	156	2	18.6404	123	2	18.6404	107	3	18.6404	142	1	18.6404	129	2	18.6404	130	1	18.6404	149	1	18.6404	140	4	18.6404	154	7	18.6404	84	2	18.6404	96	4
18.6527	131	0	18.6527	164	2	18.6527	116	3	18.6527	109	3	18.6527	131	3	18.6527	124	1	18.6527	146	2	18.6527	146	3	18.6527	158	5	18.6527	148	1	18.6527	96	1	18.6527	97	2
18.6649	129	5	18.6649	126	2	18.6649	105	1	18.6649	110	0	18.6649	136	0	18.6649	132	2	18.6649	109	3	18.6649	153	1	18.6649	160	5	18.6649	136	0	18.6649	92	2	18.6649	82	1
18.6771	147	2	18.6771	130	1	18.6771	107	5	18.6771	123	4	18.6771	119	2	18.6771	131	1	18.6771	123	5	18.6771	113	3	18.6771	150	5	18.6771	147	4	18.6771	68	4	18.6771	79	4
18.6893	157	1	18.6893	168	2	18.6893	116	5	18.6893	116	2	18.6893	125	3	18.6893	134	3	18.6893	127	3	18.6893	152	5	18.6893	160	2	18.6893	146	0	18.6893	100	2	18.6893	105	6
18.7015	140	3	18.7015	157	6	18.7015	122	0	18.7015	113	0	18.7015	126	0	18.7015	134	4	18.7015	135	5	18.7015	145	1	18.7015	157	3	18.7015	143	2	18.7015	110	3	18.7015	86	2
18.7137	147	3	18.7137	130	4	18.7137	109	2	18.7137	98	2	18.7137	144	4	18.7137	140	1	18.7137	150	7	18.7137	153	1	18.7137	130	2	18.7137	129	2	18.7137	94	4	18.7137	73	0
18.7259	123	1	18.7259	151	0	18.7259	110	1	18.7259	132	2	18.7259	123	3	18.7259	144	1	18.7259	157	3	18.7259	157	0	18.7259	145	3	18.7259	140	3	18.7259	94	1	18.7259	83	2
18.7382	144	3	18.7382	111	2	18.7382	97	2	18.7382	97	2	18.7382	131	2	18.7382	148	1	18.7382	118	4	18.7382	116	3	18.7382	148	2	18.7382	144	0	18.7382	77	4	18.7382	90	2
18.7504	141	2	18.7504	143	1	18.7504	110	7	18.7504	92	1	18.7504	119	3	18.7504	156	2	18.7504	157	2	18.7504	146	2	18.7504	135	0	18.7504	132	2	18.7504	65	1	18.7504	90	1
18.7626	127	1	18.7626	145	2	18.7626	115	1	18.7626	116	2	18.7626	137	1	18.7626	135	2	18.7626	117	1	18.7626	126	2	18.7626	133	4	18.7626	139	2	18.7626	88	4	18.7626	88	1
18.7748	145	2	18.7748	135	1	18.7748	103	2	18.7748	109	3	18.7748	120	1	18.7748	132	3	18.7748	146	2	18.7748	133	1	18.7748	157	0	18.7748	154	1	18.7748	80	3	18.7748	85	4
18.787	148	1	18.787	159	1	18.787	120	4	18.787	97	2	18.787	132	2	18.787	108	2	18.787	167	2	18.787	121	4	18.787	146	2	18.787	128	1	18.787	89	2	18.787	62	1
18.7992	143	1	18.7992	140	7	18.7992	116	1	18.7992	101	3	18.7992	118	1	18.7992	128	2	18.7992	130	4	18.7992	133	1	18.7992	166	0	18.7992	134	4	18.7992	69	2	18.7992	74	1
18.8115	149	3	18.8115	122	0	18.8115	118	2	18.8115	93	2	18.8115	121	0	18.8115	129	3	18.8115	114	5	18.8115	135	3	18.8115	147	5	18.8115	120	2	18.8115	81	0	18.8115	87	2
18.8237	128	3	18.8237	142	2	18.8237	112	1	18.8237	114	1	18.8237	131	0	18.8237	129	2	18.8237	148	5	18.8237	143	3	18.8237	135	4	18.8237	138	1	18.8237	75	0	18.8237	79	4
18.8359	129	3	18.8359	134	0	18.8359	126	1	18.8359	115	4	18.8359	124	1	18.8359	118	2	18.8359	131	2	18.8359	143	2	18.8359	144	0	18.8359	127	2	18.8359	91	1	18.8359	82	0
18.8481	170	4	18.8481	136	1	18.8481	116	1	18.8481	105	0	18.8481	116	0	18.8481	146	2	18.8481	141	4	18.8481	107	3	18.8481	134	2	18.8481	140	4	18.8481	79	1	18.8481	66	1
18.8603	135	1	18.8603	146	0	18.8603	104	2	18.8603	82	1	18.8603	117	3	18.8603	119	1	18.8603	127	2	18.8603	118	2	18.8603	142	2	18.8603	117	1	18.8603	92	2	18.8603	96	4
18.8725	118	0	18.8725	153	2	18.8725	121	2	18.8725	107	3	18.8725	143	3	18.8725	122	0	18.8725	152	0	18.8725	123	0	18.8725	124	2	18.8725	130	2	18.8725	78	2	18.8725	81	2
18.8847	131	3	18.8847	127	3	18.8847	113	3	18.8847	101	0	18.8847	146	1	18.8847	116	3	18.8847	118	3	18.8847	135	2	18.8847	129	3	18.8847	119	2	18.8847	90	1	18.8847	71	2
18.897	135	1	18.897	129	2	18.897	116	3	18.897	114	1	18.897	116	1	18.897	114	4	18.897	162	4	18.897	116	2	18.897	146	1	18.897	126	2	18.897	97	2	18.897	99	2
18.9092	151	2	18.9092	154	1	18.9092	94	1	18.9092	110	0	18.9092	125	5	18.9092	111	1	18.9092	134	4	18.9092	143	1	18.9092	127	3	18.9092	130	3	18.9092	74	1	18.9092	62	2
18.9214	136	1	18.9214	148	0	18.9214	102	4	18.9214	101	2	18.9214	112	2	18.9214	113	0	18.9214	129	3	18.9214	138	0	18.9214	144	1	18.9214	124	1	18.9214	80	2	18.9214	84	1
18.9336	136	3	18.9336	133	1	18.9336	102	5	18.9336	95	3	18.9336	112	3	18.9336	117	1	18.9336	142	3	18.9336	134	2	18.9336	141	1	18.9336	104	0	18.9336	82	3	18.9336	71	4
18.9458	121	2	18.9458	127	1	18.9458	112	5	18.9458	113	1	18.9458	133	0	18.9458	131	2	18.9458	157	4	18.9458	119	1	18.9458	160	0	18.9458	137	3	18.9458	93	2	18.9458	84	1
18.958	140	1	18.958	143	1	18.958	97	3	18.958	119	3	18.958	113	1	18.958	136	0	18.958	108	2	18.958	142	3	18.958	120	0	18.958	120	2	18.958	78	4	18.958	82	3
18.9703	144	4	18.9703	134	2	18.9703	117	3	18.9703	103	0	18.9703	131	1	18.9703	91	6	18.9703	132	6	18.9703	132	2	18.9703	128	4	18.9703	116	3	18.9703	77	2	18.9703	75	1
18.9825	125	5	18.9825	152	1	18.9825	94	3	18.9825	99	1	18.9825	108	1	18.9825	117	3	18.9825	131	0	18.9825	110	2	18.9825	147	2	18.9825	126	2	18.9825	77	1	18.9825	88	2
18.9947	124	1	18.9947	124	2	18.9947	104	3	18.9947	99	1	18.9947	128	2	18.9947	132	3	18.9947	142	1	18.9947	132	1	18.9947	125	2	18.9947	122	1	18.9947	93	1	18.9947	78	3
19.0069	138	0	19.0069	136	4	19.0069	105	4	19.0069	92	1	19.0069	125	1	19.0069	118	2	19.0069	134	5	19.0069	112	3	19.0069	135	3	19.0069	120	1	19.0069	86	1	19.0069	79	1
19.0191	137	2	19.0191	137	1	19.0191	121	2	19.0191	105	2	19.0191	123	3	19.0191	102	1	19.0191	113	1	19.0191	131	5	19.0191	123	3	19.0191	106	3	19.0191	88	0	19.0191	73	2
19.0313	146	3	19.0313	110	3	19.0313	106	4	19.0313	95	2	19.0313	130	1	19.0313	121	4	19.0313	112	3	19.0313	122	0	19.0313	138	4	19.0313	117	1	19.0313	64	5	19.0313	75	3
19.0435	139	3	19.0435	160	4	19.0435	94	2	19.0435	108	2	19.0435	116	2	19.0435	129	1	19.0435	120	2	19.0435	133	1	19.0435	147	3	19.0435	126	0	19.0435	86	0	19.0435	83	1
19.0558	125	4	19.0558	135	2	19.0558	93	3	19.0558	76	2	19.0558	113	1	19.0558	116	0	19.0558	113	3	19.0558	108	4	19.0558	124	5	19.0558	139	2	19.0558	75	2	19.0558	80	3
19.068	143	0	19.068	110	4	19.068	86	2	19.068	94	2	19.068	114	1	19.068	124	2	19.068	97	3	19.068	134	2	19.068	134	4	19.068	142	3	19.068	86	1	19.068	75	2
19.0802	146	2	19.0802	124	2	19.0802	95	2	19.0802	107	4	19.0802	100	2	19.0802	124	3	19.0802	117	3	19.0802	125	3	19.0802	122	0	19.0802	137	1	19.0802	98	2	19.0802	62	2
19.0924	128	3	19.0924	114	2	19.0924	93	3	19.0924	111	1	19.0924	89	0	19.0924	120	2	19.0924	106	9	19.0924	126	3	19.0924	140	1	19.0924	124	1	19.0924	63	0	19.0924	69	1
19.1046	134	2	19.1046	130	0	19.1046	94	1	19.1046	81	2	19.1046	98	1	19.1046	121	2	19.1046	113	7	19.1046	124	3	19.1046	173	2	19.1046	122	2	19.1046	99	2	19.1046	64	1
19.1168	144	5	19.1168	143	1	19.1168	106	2	19.1168	98	1	19.1168	121	1	19.1168	125	2	19.1168	98	6	19.1168	119	6	19.1168	117	0	19.1168	112	1	19.1168	66	3	19.1168	72	3
19.129	127	1	19.129	127	3	19.129	109	4	19.129	115	2	19.129	106	7	19.129	115	1	19.129	109	3	19.129	122	2	19.129	137	1	19.129	135	1	19.129	71	3	19.129	55	1
19.1413	137	2	19.1413	123	3	19.1413	93	2	19.1413	92	1	19.1413	113	0	19.1413	130	5	19.1413	127	5	19.1413	107	2	19.1413	134	1	19.1413	116	4	19.1413	84	1	19.1413	69	1
19.1535	142	2	19.1535	138	1	19.1535	126	6	19.1535	94	3	19.1535	105	0	19.1535	112	2	19.1535	142	5	19.1535	114	1	19.1535	119	1	19.1535	134	3	19.1535	69	0	19.1535	71	1
19.1657	112	1	19.1657	117	5	19.1657	109	2	19.1657	98	1	19.1657	115	5	19.1657	116	0	19.1657	117	2	19.1657	129	2	19.1657	119	1	19.1657	109	3	19.1657	83	1	19.1657	67	3
19.1779	144	2	19.1779	128	3	19.1779	97	0	19.1779	126	0	19.1779	107	1	19.1779	119	1	19.1779	113	3	19.1779	114	1	19.1779	121	3	19.1779	97	4	19.1779	85	2	19.1779	76	2
19.1901	127	0	19.1901	119	3	19.1901	102	2	19.1901	107	2	19.1901	106	1	19.1901	104	3	19.1901	131	4	19.1901	108	3	19.1901	141	4	19.1901	126	2	19.1901	76	3	19.1901	68	3
19.2023	132	1	19.2023	113	2	19.2023	102	2	19.2023	92	0	19.2023	113	0	19.2023	104	5	19.2023	119	4	19.2023	129	1	19.2023	132	2	19.2023	135	3	19.2023	69	0	19.2023	87	0
19.2145	140	2	19.2145	123	1	19.2145	118	1	19.2145	100	1	19.2145	116	2	19.2145	115	2	19.2145	127	2	19.2145	118	4	19.2145	122	3	19.2145	122	3	19.2145	64	1	19.2145	71	5
19.2268	149	0	19.2268	116	7	19.2268	106	5	19.2268	117	0	19.2268	108	2	19.2268	106	0	19.2268	125	2	19.2268	120	3	19.2268	129	4	19.2268	113	3	19.2268	86	1	19.2268	61	2
19.239	131	1	19.239	128	2	19.239	90	2	19.239	96	2	19.239	119	5	19.239	108	0	19.239	124	3	19.239	94	1	19.239	131	2	19.239	107	4	19.239	68	3	19.239	93	0
19.2512	119	4	19.2512	116	1	19.2512	82	2	19.2512	94	2	19.2512	115	1	19.2512	115	2	19.2512	134	4	19.2512	99	5	19.2512	130	3	19.2512	140	2	19.2512	77	3	19.2512	64	1
19.2634	130	2	19.2634	133	3	19.2634	106	2	19.2634	96	1	19.2634	126	2	19.2634	94	2	19.2634	102	5	19.2634	110	2	19.2634	126	3	19.2634	116	4	19.2634	76	2	19.2634	67	3
19.2756	136	1	19.2756	124	2	19.2756	79	4	19.2756	90	2	19.2756	121	2	19.2756	99	1	19.2756	86	5	19.2756	102	4	19.2756	135	1	19.2756	120	5	19.2756	70	2	19.2756	61	2
19.2878	125	0	19.2878	108	4	19.2878	78	3	19.2878	87	4	19.2878	109	2	19.2878	97	1	19.2878	120	2	19.2878	109	3	19.2878	113	2	19.2878	116	3	19.2878	69	0	19.2878	71	2
19.3001	103	1	19.3001	127	1	19.3001	98	3	19.3001	88	2	19.3001	113	0	19.3001	101	1	19.3001	136	3	19.3001	125	3	19.3001	138	7	19.3001	118	1	19.3001	73	3	19.3001	75	4
19.3123	132	1	19.3123	120	3	19.3123	95	2	19.3123	85	4	19.3123	110	2	19.3123	141	3	19.3123	113	2	19.3123	134	2	19.3123	124	1	19.3123	119	2	19.3123	87	1	19.3123	74	3
19.3245	102	0	19.3245	112	2	19.3245	99	4	19.3245	100	4	19.3245	111	2	19.3245	127	1	19.3245	109	7	19.3245	124	3	19.3245	114	1	19.3245	113	2	19.3245	72	4	19.3245	68	0
19.3367	147	4	19.3367	109	4	19.3367	100	2	19.3367	102	3	19.3367	115	1	19.3367	115	3	19.3367	78	2	19.3367	120	3	19.3367	126	5	19.3367	106	4	19.3367	84	3	19.3367	78	4
19.3489	123	3	19.3489	131	3	19.3489	102	4	19.3489	104	1	19.3489	103	4	19.3489	125	2	19.3489	132	3	19.3489	120	0	19.3489	115	4	19.3489	106	1	19.3489	67	0	19.3489	81	1
19.3611	131	0	19.3611	131	4	19.3611	106	3	19.3611	90	2	19.3611	111	4	19.3611	115	3	19.3611	109	2	19.3611	104	2	19.3611	132	1	19.3611	103	3	19.3611	68	3	19.3611	58	1
19.3733	135	0	19.3733	149	6	19.3733	103	3	19.3733	83	2	19.3733	109	1	19.3733	108	0	19.3733	98	6	19.3733	131	2	19.3733	118	2	19.3733	118	3	19.3733	79	2	19.3733	67	2
19.3856	129	1	19.3856	117	0	19.3856	79	1	19.3856	98	4	19.3856	116	1	19.3856	109	2	19.3856	119	4	19.3856	113	1	19.3856	136	4	19.3856	119	1	19.3856	70	2	19.3856	63	2
19.3978	118	3	19.3978	105	1	19.3978	81	3	19.3978	93	2	19.3978	102	1	19.3978	92	2	19.3978	111	1	19.3978	110	1	19.3978	129	5	19.3978	117	1	19.3978	76	5	19.3978	56	1
19.41	119	4	19.41	111	1	19.41	90	2	19.41	79	4	19.41	113	3	19.41	111	0	19.41	121	1	19.41	119	1	19.41	112	2	19.41	107	1	19.41	71	2	19.41	66	1
19.4222	130	2	19.4222	137	3	19.4222	98	4	19.4222	90	4	19.4222	94	2	19.4222	106	1	19.4222	111	4	19.4222	115	1	19.4222	131	5	19.4222	107	3	19.4222	67	4	19.4222	65	0
19.4344	122	0	19.4344	121	2	19.4344	86	3	19.4344	86	2	19.4344	112	1	19.4344	104	0	19.4344	110	4	19.4344	122	0	19.4344	110	3	19.4344	109	1	19.4344	76	2	19.4344	54	1
19.4466	117	2	19.4466	114	2	19.4466	101	4	19.4466	80	3	19.4466	115	1	19.4466	100	1	19.4466	109	3	19.4466	116	2	19.4466	132	3	19.4466	99	3	19.4466	72	7	19.4466	68	3
19.4589	122	4	19.4589	143	1	19.4589	90	2	19.4589	76	4	19.4589	114	2	19.4589	109	5	19.4589	115	1	19.4589	128	1	19.4589	122	1	19.4589	92	0	19.4589	61	2	19.4589	67	2
19.4711	125	1	19.4711	126	3	19.4711	96	2	19.4711	93	3	19.4711	112	1	19.4711	112	1	19.4711	107	5	19.4711	107	1	19.4711	112	5	19.4711	114	4	19.4711	60	1	19.4711	74	3
19.4833	123	1	19.4833	117	4	19.4833	95	3	19.4833	89	2	19.4833	112	1	19.4833	117	1	19.4833	112	7	19.4833	115	2	19.4833	107	3	19.4833	110	5	19.4833	62	4	19.4833	75	1
19.4955	103	5	19.4955	98	4	19.4955	80	1	19.4955	101	3	19.4955	105	6	19.4955	111	3	19.4955	109	3	19.4955	96	3	19.4955	125	1	19.4955	119	1	19.4955	71	4	19.4955	86	2
19.5077	114	3	19.5077	108	2	19.5077	89	3	19.5077	68	4	19.5077	102	3	19.5077	113	1	19.5077	104	2	19.5077	120	0	19.5077	110	5	19.5077	110	1	19.5077	70	1	19.5077	68	1
19.5199	111	1	19.5199	115	4	19.5199	85	2	19.5199	102	1	19.5199	104	3	19.5199	104	2	19.5199	114	2	19.5199	118	2	19.5199	126	1	19.5199	120	1	19.5199	69	2	19.5199	56	0
19.5322	136	2	19.5322	123	4	19.5322	82	3	19.5322	86	4	19.5322	110	1	19.5322	106	2	19.5322	84	2	19.5322	126	4	19.5322	130	1	19.5322	104	4	19.5322	61	3	19.5322	72	3
19.5444	119	5	19.5444	118	0	19.5444	97	1	19.5444	95	1	19.5444	115	1	19.5444	91	2	19.5444	106	4	19.5444	115	5	19.5444	114	1	19.5444	123	4	19.5444	70	2	19.5444	57	3
19.5566	114	4	19.5566	97	2	19.5566	96	0	19.5566	108	3	19.5566	104	0	19.5566	110	4	19.5566	102	4	19.5566	109	2	19.5566	114	2	19.5566	100	1	19.5566	73	4	19.5566	58	1
19.5688	112	4	19.5688	125	0	19.5688	95	2	19.5688	107	3	19.5688	96	4	19.5688	105	5	19.5688	132	2	19.5688	111	0	19.5688	111	1	19.5688	106	5	19.5688	61	2	19.5688	62	1
19.581	114	5	19.581	120	2	19.581	83	1	19.581	106	3	19.581	111	1	19.581	93	2	19.581	113	6	19.581	115	4	19.581	113	0	19.581	108	1	19.581	60	5	19.581	67	2
19.5932	101	1	19.5932	119	2	19.5932	88	0	19.5932	84	2	19.5932	81	3	19.5932	92	1	19.5932	111	4	19.5932	90	3	19.5932	115	3	19.5932	105	4	19.5932	53	0	19.5932	73	4
19.6054	123	2	19.6054	118	3	19.6054	108	1	19.6054	77	3	19.6054	112	5	19.6054	105	2	19.6054	117	3	19.6054	86	6	19.6054	106	1	19.6054	117	3	19.6054	59	3	19.6054	52	5
19.6177	114	0	19.6177	124	1	19.6177	89	1	19.6177	92	1	19.6177	124	4	19.6177	104	2	19.6177	100	5	19.6177	103	1	19.6177	100	5	19.6177	122	6	19.6177	67	5	19.6177	82	2
19.6299	103	3	19.6299	110	1	19.6299	81	4	19.6299	89	2	19.6299	110	0	19.6299	111	3	19.6299	104	1	19.6299	103	1	19.6299	128	2	19.6299	106	1	19.6299	65	4	19.6299	54	2
19.6421	109	1	19.6421	113	3	19.6421	88	4	19.6421	72	1	19.6421	100	4	19.6421	109	2	19.6421	101	2	19.6421	112	3	19.6421	116	3	19.6421	103	3	19.6421	71	1	19.6421	58	4
19.6543	114	2	19.6543	114	1	19.6543	86	3	19.6543	89	1	19.6543	102	3	19.6543	99	0	19.6543	114	0	19.6543	109	2	19.6543	116	2	19.6543	119	0	19.6543	84	0	19.6543	62	1
19.6665	114	1	19.6665	118	2	19.6665	81	3	19.6665	98	2	19.6665	97	0	19.6665	105	1	19.6665	120	5	19.6665	117	2	19.6665	125	3	19.6665	93	3	19.6665	74	3	19.6665	57	6
19.6787	117	2	19.6787	118	2	19.6787	67	3	19.6787	82	0	19.6787	99	3	19.6787	95	2	19.6787	100	6	19.6787	121	7	19.6787	88	2	19.6787	122	2	19.6787	67	3	19.6787	71	0
19.691	114	1	19.691	104	4	19.691	87	1	19.691	85	4	19.691	105	3	19.691	96	0	19.691	105	2	19.691	111	5	19.691	110	3	19.691	102	2	19.691	72	3	19.691	54	0
19.7032	123	2	19.7032	112	1	19.7032	82	2	19.7032	87	4	19.7032	82	1	19.7032	102	3	19.7032	96	3	19.7032	126	2	19.7032	103	2	19.7032	113	0	19.7032	63	0	19.7032	58	8
19.7154	118	2	19.7154	113	1	19.7154	72	4	19.7154	89	1	19.7154	97	0	19.7154	92	2	19.7154	90	2	19.7154	83	3	19.7154	133	0	19.7154	104	2	19.7154	69	1	19.7154	56	1
19.7276	118	1	19.7276	121	4	19.7276	75	2	19.7276	92	2	19.7276	123	1	19.7276	73	4	19.7276	92	6	19.7276	106	0	19.7276	94	1	19.7276	111	2	19.7276	69	1	19.7276	61	2
19.7398	110	1	19.7398	105	1	19.7398	85	4	19.7398	85	3	19.7398	96	1	19.7398	104	2	19.7398	110	5	19.7398	111	2	19.7398	122	5	19.7398	106	2	19.7398	60	4	19.7398	57	1
19.752	110	3	19.752	103	2	19.752	91	3	19.752	110	0	19.752	120	2	19.752	92	0	19.752	102	6	19.752	88	2	19.752	122	1	19.752	93	3	19.752	76	3	19.752	57	0
19.7642	115	2	19.7642	111	5	19.7642	84	2	19.7642	83	3	19.7642	91	3	19.7642	113	3	19.7642	91	3	19.7642	110	1	19.7642	130	1	19.7642	110	0	19.7642	74	2	19.7642	51	2
19.7765	118	3	19.7765	109	1	19.7765	78	6	19.7765	79	3	19.7765	116	4	19.7765	121	2	19.7765	111	4	19.7765	95	4	19.7765	106	0	19.7765	122	1	19.7765	65	1	19.7765	62	1
19.7887	100	2	19.7887	110	0	19.7887	74	4	19.7887	81	3	19.7887	99	4	19.7887	105	2	19.7887	106	4	19.7887	101	2	19.7887	122	4	19.7887	104	0	19.7887	66	2	19.7887	80	2
19.8009	121	0	19.8009	109	1	19.8009	74	2	19.8009	75	3	19.8009	120	2	19.8009	102	0	19.8009	95	3	19.8009	105	2	19.8009	106	2	19.8009	130	2	19.8009	77	3	19.8009	69	0
19.8131	118	1	19.8131	106	5	19.8131	104	1	19.8131	70	3	19.8131	105	6	19.8131	85	3	19.8131	80	4	19.8131	110	2	19.8131	121	1	19.8131	98	4	19.8131	76	3	19.8131	60	2
19.8253	119	0	19.8253	119	3	19.8253	98	4	19.8253	65	3	19.8253	86	2	19.8253	95	1	19.8253	99	2	19.8253	106	2	19.8253	117	4	19.8253	89	1	19.8253	70	4	19.8253	65	1
19.8375	114	0	19.8375	110	5	19.8375	97	4	19.8375	91	2	19.8375	99	4	19.8375	105	2	19.8375	105	0	19.8375	98	2	19.8375	94	1	19.8375	107	3	19.8375	60	1	19.8375	66	1
19.8498	123	1	19.8498	109	3	19.8498	79	4	19.8498	81	2	19.8498	92	3	19.8498	92	3	19.8498	102	4	19.8498	93	0	19.8498	117	1	19.8498	104	0	19.8498	58	4	19.8498	68	0
19.862	136	4	19.862	113	2	19.862	89	3	19.862	71	0	19.862	96	1	19.862	92	1	19.862	100	1	19.862	107	7	19.862	86	5	19.862	97	1	19.862	71	0	19.862	56	2
19.8742	111	2	19.8742	117	1	19.8742	82	2	19.8742	66	1	19.8742	108	3	19.8742	97	2	19.8742	98	5	19.8742	103	0	19.8742	106	3	19.8742	98	2	19.8742	70	1	19.8742	62	1
19.8864	119	2	19.8864	106	0	19.8864	101	1	19.8864	95	1	19.8864	108	2	19.8864	105	1	19.8864	93	3	19.8864	91	1	19.8864	133	1	19.8864	92	3	19.8864	49	2	19.8864	53	4
19.8986	125	1	19.8986	103	3	19.8986	71	3	19.8986	92	2	19.8986	89	1	19.8986	90	3	19.8986	103	3	19.8986	87	1	19.8986	107	6	19.8986	107	1	19.8986	59	3	19.8986	73	4
19.9108	109	1	19.9108	97	4	19.9108	76	2	19.9108	85	2	19.9108	97	0	19.9108	95	3	19.9108	93	3	19.9108	104	2	19.9108	115	2	19.9108	94	5	19.9108	67	1	19.9108	60	1
19.923	98	4	19.923	104	1	19.923	78	2	19.923	78	2	19.923	99	3	19.923	94	1	19.923	95	4	19.923	89	2	19.923	123	2	19.923	105	0	19.923	62	4	19.923	67	5
19.9352	97	4	19.9352	122	1	19.9352	74	2	19.9352	77	2	19.9352	101	0	19.9352	100	2	19.9352	101	5	19.9352	87	3	19.9352	117	2	19.9352	101	2	19.9352	56	2	19.9352	42	2
19.9475	107	1	19.9475	107	1	19.9475	71	5	19.9475	81	5	19.9475	92	3	19.9475	96	2	19.9475	115	3	19.9475	101	2	19.9475	122	2	19.9475	74	3	19.9475	64	2	19.9475	59	2
19.9597	122	4	19.9597	97	3	19.9597	80	0	19.9597	79	1	19.9597	102	4	19.9597	87	1	19.9597	103	4	19.9597	94	4	19.9597	102	1	19.9597	74	2	19.9597	51	1	19.9597	68	2
19.9719	123	3	19.9719	113	2	19.9719	79	0	19.9719	67	3	19.9719	110	0	19.9719	108	3	19.9719	104	2	19.9719	94	1	19.9719	86	1	19.9719	84	2	19.9719	55	3	19.9719	59	1
19.9841	98	0	19.9841	97	3	19.9841	70	4	19.9841	78	0	19.9841	90	0	19.9841	91	2	19.9841	94	3	19.9841	93	3	19.9841	105	2	19.9841	92	3	19.9841	57	4	19.9841	48	0
19.9963	100	0	19.9963	94	1	19.9963	82	3	19.9963	80	2	19.9963	112	0	19.9963	98	3	19.9963	98	4	19.9963	96	3	19.9963	104	0	19.9963	104	2	19.9963	71	2	19.9963	50	1
20.0085	109	1	20.0085	94	2	20.0085	72	0	20.0085	69	1	20.0085	103	2	20.0085	95	3	20.0085	93	2	20.0085	95	2	20.0085	120	2	20.0085	92	1	20.0085	61	1	20.0085	66	4
20.0208	111	1	20.0208	91	4	20.0208	78	2	20.0208	75	3	20.0208	90	2	20.0208	87	2	20.0208	103	4	20.0208	87	0	20.0208	109	2	20.0208	111	1	20.0208	58	1	20.0208	64	4
20.033	120	1	20.033	99	0	20.033	80	3	20.033	85	5	20.033	109	4	20.033	90	1	20.033	94	3	20.033	100	1	20.033	108	4	20.033	115	3	20.033	77	1	20.033	55	0
20.0452	114	4	20.0452	107	4	20.0452	72	1	20.0452	72	1	20.0452	88	2	20.0452	84	2	20.0452	83	5	20.0452	98	1	20.0452	106	1	20.0452	104	2	20.0452	47	2	20.0452	59	0
20.0574	102	2	20.0574	95	3	20.0574	78	5	20.0574	74	1	20.0574	93	2	20.0574	90	2	20.0574	75	4	20.0574	88	1	20.0574	101	1	20.0574	90	0	20.0574	71	1	20.0574	51	5
20.0696	100	4	20.0696	94	2	20.0696	82	1	20.0696	90	3	20.0696	99	2	20.0696	75	0	20.0696	105	1	20.0696	90	2	20.0696	87	2	20.0696	120	2	20.0696	67	1	20.0696	59	0
20.0818	106	3	20.0818	108	5	20.0818	82	2	20.0818	75	2	20.0818	74	1	20.0818	86	0	20.0818	87	3	20.0818	86	3	20.0818	99	1	20.0818	93	3	20.0818	60	2	20.0818	55	1
20.094	128	6	20.094	96	3	20.094	62	5	20.094	73	3	20.094	90	3	20.094	83	1	20.094	76	8	20.094	106	0	20.094	102	2	20.094	112	4	20.094	57	2	20.094	53	1
20.1063	115	3	20.1063	115	1	20.1063	72	3	20.1063	86	3	20.1063	88	2	20.1063	79	4	20.1063	101	3	20.1063	105	1	20.1063	102	1	20.1063	80	3	20.1063	45	1	20.1063	57	2
20.1185	94	3	20.1185	100	1	20.1185	75	7	20.1185	71	3	20.1185	88	2	20.1185	89	0	20.1185	86	4	20.1185	104	0	20.1185	114	4	20.1185	94	0	20.1185	58	2	20.1185	62	2
20.1307	111	1	20.1307	122	3	20.1307	79	1	20.1307	85	2	20.1307	116	0	20.1307	106	1	20.1307	85	2	20.1307	72	4	20.1307	101	1	20.1307	112	1	20.1307	72	3	20.1307	59	2
20.1429	91	3	20.1429	109	2	20.1429	75	3	20.1429	70	1	20.1429	96	1	20.1429	100	2	20.1429	87	2	20.1429	96	2	20.1429	101	4	20.1429	89	2	20.1429	51	1	20.1429	51	2
20.1551	108	4	20.1551	121	1	20.1551	69	3	20.1551	59	1	20.1551	120	0	20.1551	86	1	20.1551	84	1	20.1551	87	0	20.1551	98	2	20.1551	91	0	20.1551	58	6	20.1551	57	0
20.1673	102	1	20.1673	97	6	20.1673	84	2	20.1673	64	1	20.1673	92	3	20.1673	94	2	20.1673	102	0	20.1673	83	3	20.1673	99	3	20.1673	95	1	20.1673	55	0	20.1673	50	4
20.1796	118	0	20.1796	100	3	20.1796	77	1	20.1796	68	2	20.1796	97	2	20.1796	94	1	20.1796	86	6	20.1796	78	3	20.1796	94	1	20.1796	106	1	20.1796	52	2	20.1796	60	1
20.1918	101	4	20.1918	107	1	20.1918	73	2	20.1918	75	3	20.1918	99	4	20.1918	95	1	20.1918	93	5	20.1918	99	2	20.1918	105	4	20.1918	95	2	20.1918	59	3	20.1918	57	6
20.204	90	1	20.204	100	2	20.204	67	0	20.204	81	1	20.204	94	1	20.204	87	2	20.204	76	3	20.204	92	5	20.204	95	3	20.204	85	2	20.204	59	1	20.204	60	1
20.2162	112	2	20.2162	95	3	20.2162	79	3	20.2162	69	3	20.2162	86	0	20.2162	81	1	20.2162	99	1	20.2162	86	4	20.2162	96	2	20.2162	104	2	20.2162	63	3	20.2162	55	3
20.2284	100	4	20.2284	93	2	20.2284	80	3	20.2284	66	1	20.2284	95	1	20.2284	94	0	20.2284	95	3	20.2284	96	3	20.2284	100	2	20.2284	97	1	20.2284	70	2	20.2284	54	2
20.2406	111	4	20.2406	84	3	20.2406	72	6	20.2406	83	0	20.2406	92	2	20.2406	92	2	20.2406	109	3	20.2406	93	1	20.2406	86	0	20.2406	88	2	20.2406	70	3	20.2406	42	5
20.2528	115	4	20.2528	101	3	20.2528	75	2	20.2528	72	2	20.2528	88	1	20.2528	89	2	20.2528	97	2	20.2528	88	1	20.2528	106	1	20.2528	80	0	20.2528	46	2	20.2528	53	1
20.2651	110	2	20.2651	87	5	20.2651	100	1	20.2651	76	0	20.2651	90	1	20.2651	88	0	20.2651	96	4	20.2651	87	1	20.2651	96	0	20.2651	89	2	20.2651	58	2	20.2651	57	3
20.2773	117	5	20.2773	98	3	20.2773	62	2	20.2773	61	1	20.2773	84	2	20.2773	95	1	20.2773	87	1	20.2773	104	1	20.2773	93	4	20.2773	92	2	20.2773	51	1	20.2773	62	3
20.2895	92	0	20.2895	91	2	20.2895	81	2	20.2895	78	0	20.2895	96	1	20.2895	80	1	20.2895	92	4	20.2895	96	1	20.2895	114	1	20.2895	89	2	20.2895	65	5	20.2895	56	2
20.3017	117	2	20.3017	111	2	20.3017	83	0	20.3017	66	0	20.3017	76	1	20.3017	81	3	20.3017	82	5	20.3017	101	2	20.3017	110	1	20.3017	86	0	20.3017	78	3	20.3017	61	2
20.3139	90	5	20.3139	97	5	20.3139	85	3	20.3139	87	0	20.3139	86	2	20.3139	87	3	20.3139	87	4	20.3139	78	2	20.3139	102	0	20.3139	82	1	20.3139	48	2	20.3139	61	2
20.3261	103	2	20.3261	82	3	20.3261	71	6	20.3261	57	7	20.3261	92	3	20.3261	86	1	20.3261	88	3	20.3261	93	4	20.3261	94	2	20.3261	73	2	20.3261	55	2	20.3261	49	1
20.3383	101	2	20.3383	104	1	20.3383	73	4	20.3383	69	0	20.3383	93	2	20.3383	86	0	20.3383	91	6	20.3383	87	4	20.3383	100	2	20.3383	82	3	20.3383	63	3	20.3383	52	0
20.3506	104	0	20.3506	101	0	20.3506	73	1	20.3506	76	1	20.3506	90	1	20.3506	74	4	20.3506	101	6	20.3506	88	2	20.3506	105	1	20.3506	98	2	20.3506	55	3	20.3506	54	2
20.3628	106	2	20.3628	87	5	20.3628	65	5	20.3628	79	3	20.3628	99	1	20.3628	88	1	20.3628	81	3	20.3628	68	1	20.3628	94	2	20.3628	98	1	20.3628	60	2	20.3628	52	4
20.375	105	6	20.375	92	2	20.375	72	0	20.375	70	2	20.375	86	3	20.375	90	2	20.375	94	1	20.375	104	3	20.375	101	3	20.375	108	1	20.375	46	2	20.375	43	1
20.3872	112	4	20.3872	71	1	20.3872	67	2	20.3872	48	4	20.3872	95	5	20.3872	89	3	20.3872	92	1	20.3872	89	5	20.3872	98	4	20.3872	93	4	20.3872	51	0	20.3872	52	4
20.3994	84	4	20.3994	87	2	20.3994	75	4	20.3994	76	0	20.3994	80	1	20.3994	87	1	20.3994	92	4	20.3994	96	2	20.3994	105	2	20.3994	97	4	20.3994	68	3	20.3994	47	0
20.4117	100	2	20.4117	73	3	20.4117	83	3	20.4117	53	2	20.4117	89	0	20.4117	78	5	20.4117	98	6	20.4117	96	2	20.4117	94	2	20.4117	77	0	20.4117	64	3	20.4117	47	1
20.4239	88	3	20.4239	96	2	20.4239	58	0	20.4239	69	3	20.4239	85	4	20.4239	85	6	20.4239	80	3	20.4239	97	0	20.4239	96	4	20.4239	93	3	20.4239	54	0	20.4239	43	1
20.4361	103	2	20.4361	91	3	20.4361	82	3	20.4361	61	0	20.4361	78	6	20.4361	86	1	20.4361	77	6	20.4361	92	5	20.4361	91	1	20.4361	92	2	20.4361	58	1	20.4361	53	0
20.4483	100	3	20.4483	101	2	20.4483	66	4	20.4483	78	3	20.4483	94	4	20.4483	84	0	20.4483	91	3	20.4483	74	0	20.4483	88	1	20.4483	98	0	20.4483	50	5	20.4483	45	1
20.4605	95	3	20.4605	103	3	20.4605	69	1	20.4605	74	2	20.4605	75	2	20.4605	84	1	20.4605	81	5	20.4605	84	4	20.4605	103	3	20.4605	89	4	20.4605	58	1	20.4605	59	4
20.4727	77	5	20.4727	83	0	20.4727	80	6	20.4727	71	3	20.4727	86	1	20.4727	77	3	20.4727	91	5	20.4727	73	2	20.4727	96	2	20.4727	73	3	20.4727	48	1	20.4727	58	4
20.4849	104	2	20.4849	95	0	20.4849	62	2	20.4849	72	3	20.4849	96	3	20.4849	77	2	20.4849	89	2	20.4849	88	2	20.4849	82	1	20.4849	94	0	20.4849	58	1	20.4849	61	0
20.4972	82	2	20.4972	83	1	20.4972	64	0	20.4972	74	5	20.4972	94	3	20.4972	87	1	20.4972	74	2	20.4972	78	2	20.4972	83	1	20.4972	91	4	20.4972	58	1	20.4972	46	3
20.5094	86	2	20.5094	93	2	20.5094	76	3	20.5094	57	2	20.5094	74	0	20.5094	79	2	20.5094	84	5	20.5094	80	0	20.5094	89	4	20.5094	80	4	20.5094	55	2	20.5094	57	1
20.5216	79	3	20.5216	98	2	20.5216	69	0	20.5216	71	1	20.5216	80	0	20.5216	79	3	20.5216	99	4	20.5216	76	2	20.5216	79	5	20.5216	89	2	20.5216	71	2	20.5216	52	2
20.5338	77	4	20.5338	123	1	20.5338	75	2	20.5338	59	1	20.5338	85	3	20.5338	74	0	20.5338	84	4	20.5338	79	0	20.5338	89	4	20.5338	97	3	20.5338	46	2	20.5338	45	2
20.546	104	5	20.546	74	0	20.546	59	0	20.546	63	3	20.546	94	3	20.546	83	2	20.546	93	1	20.546	86	1	20.546	95	4	20.546	93	3	20.546	53	2	20.546	50	0
20.5582	100	5	20.5582	89	3	20.5582	59	3	20.5582	56	2	20.5582	82	4	20.5582	83	2	20.5582	100	3	20.5582	86	2	20.5582	93	1	20.5582	94	1	20.5582	55	3	20.5582	50	1
20.5704	91	0	20.5704	95	2	20.5704	58	2	20.5704	74	2	20.5704	88	1	20.5704	85	1	20.5704	86	4	20.5704	79	2	20.5704	95	2	20.5704	82	1	20.5704	58	1	20.5704	68	2
20.5827	101	1	20.5827	97	1	20.5827	76	2	20.5827	61	1	20.5827	96	1	20.5827	88	0	20.5827	84	5	20.5827	88	2	20.5827	69	4	20.5827	68	4	20.5827	47	2	20.5827	70	3
20.5949	105	0	20.5949	88	3	20.5949	77	4	20.5949	70	2	20.5949	90	3	20.5949	85	0	20.5949	90	3	20.5949	79	2	20.5949	111	2	20.5949	84	1	20.5949	45	0	20.5949	51	1
20.6071	101	2	20.6071	82	2	20.6071	79	4	20.6071	53	3	20.6071	87	4	20.6071	76	1	20.6071	93	4	20.6071	87	3	20.6071	77	4	20.6071	96	1	20.6071	47	7	20.6071	65	4
20.6193	78	3	20.6193	68	4	20.6193	71	1	20.6193	53	3	20.6193	83	0	20.6193	72	2	20.6193	86	4	20.6193	100	4	20.6193	76	1	20.6193	93	0	20.6193	47	0	20.6193	38	2
20.6315	101	1	20.6315	88	3	20.6315	73	4	20.6315	60	1	20.6315	75	3	20.6315	81	2	20.6315	89	2	20.6315	91	4	20.6315	114	1	20.6315	88	2	20.6315	51	0	20.6315	50	3
20.6437	82	4	20.6437	88	2	20.6437	71	4	20.6437	72	3	20.6437	90	0	20.6437	92	2	20.6437	86	0	20.6437	82	0	20.6437	90	2	20.6437	98	4	20.6437	55	1	20.6437	56	3
20.656	98	4	20.656	101	0	20.656	62	1	20.656	57	1	20.656	74	2	20.656	80	3	20.656	97	2	20.656	82	2	20.656	100	2	20.656	83	0	20.656	53	2	20.656	41	4
20.6682	100	2	20.6682	88	2	20.6682	67	2	20.6682	64	2	20.6682	75	0	20.6682	82	2	20.6682	70	1	20.6682	86	1	20.6682	92	6	20.6682	85	4	20.6682	57	2	20.6682	31	4
20.6804	77	2	20.6804	85	2	20.6804	70	1	20.6804	65	0	20.6804	78	2	20.6804	69	2	20.6804	77	4	20.6804	59	2	20.6804	79	1	20.6804	111	2	20.6804	50	2	20.6804	45	0
20.6926	97	6	20.6926	87	1	20.6926	64	3	20.6926	61	3	20.6926	86	2	20.6926	86	1	20.6926	78	1	20.6926	83	0	20.6926	101	3	20.6926	87	2	20.6926	39	0	20.6926	47	2
20.7048	83	3	20.7048	88	2	20.7048	72	2	20.7048	69	1	20.7048	76	0	20.7048	79	5	20.7048	86	1	20.7048	76	3	20.7048	94	1	20.7048	80	1	20.7048	41	5	20.7048	37	0
20.717	115	3	20.717	77	1	20.717	66	2	20.717	84	0	20.717	78	1	20.717	85	0	20.717	86	0	20.717	79	0	20.717	85	1	20.717	75	0	20.717	40	0	20.717	53	3
20.7292	107	3	20.7292	102	0	20.7292	68	2	20.7292	62	1	20.7292	75	0	20.7292	89	3	20.7292	72	2	20.7292	87	4	20.7292	80	2	20.7292	77	3	20.7292	42	1	20.7292	39	3
20.7415	89	3	20.7415	86	1	20.7415	69	1	20.7415	64	4	20.7415	64	1	20.7415	59	3	20.7415	69	1	20.7415	89	0	20.7415	88	1	20.7415	93	2	20.7415	52	3	20.7415	60	1
20.7537	97	2	20.7537	72	3	20.7537	61	1	20.7537	63	2	20.7537	77	2	20.7537	81	4	20.7537	77	4	20.7537	80	0	20.7537	84	0	20.7537	67	3	20.7537	48	3	20.7537	54	2
20.7659	88	3	20.7659	88	2	20.7659	63	2	20.7659	61	2	20.7659	58	4	20.7659	75	2	20.7659	79	2	20.7659	83	4	20.7659	63	5	20.7659	95	5	20.7659	40	3	20.7659	49	1
20.7781	73	1	20.7781	90	3	20.7781	72	2	20.7781	50	2	20.7781	77	2	20.7781	81	1	20.7781	73	5	20.7781	93	3	20.7781	90	1	20.7781	93	4	20.7781	43	1	20.7781	51	2
20.7903	84	2	20.7903	90	3	20.7903	62	2	20.7903	59	0	20.7903	81	3	20.7903	82	0	20.7903	75	4	20.7903	77	3	20.7903	80	3	20.7903	84	2	20.7903	57	2	20.7903	51	1
20.8025	95	2	20.8025	82	4	20.8025	67	3	20.8025	62	6	20.8025	78	4	20.8025	76	1	20.8025	77	2	20.8025	83	3	20.8025	86	5	20.8025	88	1	20.8025	45	0	20.8025	58	2
20.8148	83	2	20.8148	101	0	20.8148	80	1	20.8148	58	1	20.8148	95	1	20.8148	84	0	20.8148	70	6	20.8148	69	2	20.8148	91	1	20.8148	85	4	20.8148	57	1	20.8148	52	0
20.827	92	2	20.827	79	2	20.827	67	3	20.827	63	1	20.827	73	4	20.827	93	4	20.827	85	4	20.827	74	2	20.827	69	0	20.827	82	3	20.827	51	4	20.827	59	2
20.8392	86	0	20.8392	103	3	20.8392	72	2	20.8392	55	3	20.8392	75	5	20.8392	74	2	20.8392	60	1	20.8392	74	2	20.8392	95	1	20.8392	74	0	20.8392	63	3	20.8392	44	2
20.8514	85	1	20.8514	81	1	20.8514	65	7	20.8514	62	4	20.8514	66	2	20.8514	76	3	20.8514	73	4	20.8514	71	2	20.8514	90	0	20.8514	91	2	20.8514	48	4	20.8514	49	1
20.8636	68	1	20.8636	105	1	20.8636	58	5	20.8636	57	3	20.8636	85	1	20.8636	78	1	20.8636	84	7	20.8636	89	1	20.8636	87	6	20.8636	73	1	20.8636	45	7	20.8636	54	0
20.8758	87	5	20.8758	77	2	20.8758	62	1	20.8758	82	0	20.8758	81	0	20.8758	64	2	20.8758	68	2	20.8758	74	0	20.8758	62	2	20.8758	81	3	20.8758	44	2	20.8758	46	5
20.888	84	1	20.888	104	0	20.888	43	0	20.888	63	3	20.888	70	2	20.888	71	0	20.888	80	2	20.888	78	3	20.888	88	3	20.888	72	2	20.888	57	3	20.888	33	0
20.9002	91	5	20.9002	76	3	20.9002	73	1	20.9002	59	2	20.9002	81	2	20.9002	74	2	20.9002	76	4	20.9002	83	2	20.9002	73	3	20.9002	88	1	20.9002	51	1	20.9002	51	4
20.9125	88	3	20.9125	76	2	20.9125	60	2	20.9125	52	1	20.9125	101	2	20.9125	78	2	20.9125	88	2	20.9125	71	3	20.9125	98	2	20.9125	96	2	20.9125	47	2	20.9125	45	3
20.9247	63	2	20.9247	85	2	20.9247	58	4	20.9247	53	1	20.9247	88	1	20.9247	68	1	20.9247	85	4	20.9247	65	3	20.9247	95	1	20.9247	87	3	20.9247	54	1	20.9247	46	3
20.9369	78	0	20.9369	87	1	20.9369	65	3	20.9369	61	3	20.9369	70	2	20.9369	67	1	20.9369	76	3	20.9369	81	1	20.9369	75	5	20.9369	79	1	20.9369	38	2	20.9369	54	5
20.9491	80	1	20.9491	84	1	20.9491	59	1	20.9491	91	3	20.9491	77	2	20.9491	73	3	20.9491	75	3	20.9491	68	3	20.9491	89	5	20.9491	74	3	20.9491	44	1	20.9491	43	5
20.9613	77	0	20.9613	63	2	20.9613	50	2	20.9613	57	3	20.9613	67	1	20.9613	73	0	20.9613	80	3	20.9613	89	1	20.9613	88	0	20.9613	68	1	20.9613	38	2	20.9613	44	3
20.9735	79	1	20.9735	89	3	20.9735	64	1	20.9735	56	0	20.9735	75	3	20.9735	67	2	20.9735	69	4	20.9735	70	2	20.9735	88	3	20.9735	74	3	20.9735	46	5	20.9735	39	3
20.9858	79	3	20.9858	84	3	20.9858	70	2	20.9858	68	2	20.9858	56	1	20.9858	86	2	20.9858	83	3	20.9858	73	1	20.9858	96	1	20.9858	70	2	20.9858	42	4	20.9858	52	4
20.998	87	1	20.998	94	3	20.998	51	2	20.998	75	2	20.998	101	2	20.998	65	1	20.998	79	6	20.998	62	2	20.998	73	3	20.998	88	1	20.998	63	2	20.998	43	0
21.0102	70	3	21.0102	95	2	21.0102	73	2	21.0102	75	4	21.0102	96	1	21.0102	82	0	21.0102	62	6	21.0102	78	2	21.0102	87	6	21.0102	62	1	21.0102	45	6	21.0102	45	1
21.0224	79	1	21.0224	81	1	21.0224	67	2	21.0224	70	1	21.0224	78	0	21.0224	68	3	21.0224	85	1	21.0224	72	1	21.0224	78	2	21.0224	86	0	21.0224	39	1	21.0224	48	1
21.0346	70	1	21.0346	93	2	21.0346	60	3	21.0346	52	1	21.0346	67	0	21.0346	84	1	21.0346	69	1	21.0346	79	2	21.0346	87	3	21.0346	85	1	21.0346	52	4	21.0346	54	2
21.0468	84	2	21.0468	81	2	21.0468	60	1	21.0468	66	3	21.0468	66	1	21.0468	74	1	21.0468	72	2	21.0468	57	1	21.0468	86	2	21.0468	73	4	21.0468	70	3	21.0468	44	2
21.059	67	3	21.059	82	1	21.059	63	7	21.059	59	1	21.059	70	2	21.059	77	1	21.059	90	1	21.059	61	3	21.059	91	2	21.059	76	2	21.059	35	3	21.059	38	4
21.0713	73	3	21.0713	78	2	21.0713	56	5	21.0713	53	4	21.0713	65	0	21.0713	68	1	21.0713	79	4	21.0713	66	0	21.0713	83	2	21.0713	81	4	21.0713	52	4	21.0713	45	5
21.0835	81	3	21.0835	88	2	21.0835	52	2	21.0835	66	1	21.0835	79	4	21.0835	62	1	21.0835	66	6	21.0835	70	2	21.0835	71	3	21.0835	57	2	21.0835	43	1	21.0835	53	6
21.0957	78	3	21.0957	74	3	21.0957	57	2	21.0957	59	0	21.0957	67	0	21.0957	68	2	21.0957	73	3	21.0957	83	2	21.0957	82	1	21.0957	62	1	21.0957	33	1	21.0957	52	2
21.1079	71	2	21.1079	85	0	21.1079	53	2	21.1079	50	4	21.1079	65	0	21.1079	74	0	21.1079	73	2	21.1079	59	4	21.1079	74	3	21.1079	71	2	21.1079	48	1	21.1079	33	1
21.1201	79	1	21.1201	83	1	21.1201	46	4	21.1201	63	3	21.1201	86	0	21.1201	73	1	21.1201	64	3	21.1201	74	2	21.1201	85	4	21.1201	82	5	21.1201	48	4	21.1201	39	2
21.1323	95	3	21.1323	73	1	21.1323	58	1	21.1323	71	4	21.1323	81	4	21.1323	72	3	21.1323	68	1	21.1323	74	2	21.1323	91	3	21.1323	72	4	21.1323	49	6	21.1323	44	2
21.1446	73	1	21.1446	85	0	21.1446	64	3	21.1446	63	0	21.1446	78	7	21.1446	58	4	21.1446	66	3	21.1446	64	1	21.1446	76	2	21.1446	63	2	21.1446	48	2	21.1446	47	2
21.1568	80	4	21.1568	76	2	21.1568	56	5	21.1568	79	2	21.1568	85	2	21.1568	82	0	21.1568	63	4	21.1568	76	1	21.1568	88	2	21.1568	70	0	21.1568	45	3	21.1568	53	2
21.169	71	4	21.169	78	2	21.169	63	3	21.169	54	1	21.169	72	2	21.169	57	0	21.169	73	2	21.169	75	3	21.169	72	1	21.169	71	2	21.169	55	0	21.169	43	3
21.1812	73	2	21.1812	82	4	21.1812	56	3	21.1812	58	2	21.1812	67	1	21.1812	67	0	21.1812	63	3	21.1812	67	5	21.1812	81	3	21.1812	88	2	21.1812	42	1	21.1812	46	1
21.1934	99	1	21.1934	75	2	21.1934	61	1	21.1934	56	2	21.1934	63	1	21.1934	63	3	21.1934	71	0	21.1934	64	0	21.1934	83	1	21.1934	92	4	21.1934	48	3	21.1934	55	2
21.2056	67	0	21.2056	71	3	21.2056	53	3	21.2056	47	1	21.2056	73	2	21.2056	67	3	21.2056	75	4	21.2056	74	5	21.2056	85	4	21.2056	67	1	21.2056	46	0	21.2056	36	5
21.2178	84	3	21.2178	79	2	21.2178	62	1	21.2178	60	3	21.2178	63	1	21.2178	73	3	21.2178	66	1	21.2178	81	4	21.2178	75	1	21.2178	84	2	21.2178	31	1	21.2178	50	3
21.2301	82	0	21.2301	75	2	21.2301	55	0	21.2301	57	1	21.2301	60	1	21.2301	59	0	21.2301	76	2	21.2301	75	1	21.2301	70	2	21.2301	78	3	21.2301	51	1	21.2301	44	0
21.2423	74	4	21.2423	80	3	21.2423	58	2	21.2423	60	1	21.2423	64	1	21.2423	66	1	21.2423	55	3	21.2423	74	3	21.2423	79	3	21.2423	81	3	21.2423	39	2	21.2423	50	4
21.2545	65	1	21.2545	64	3	21.2545	48	2	21.2545	54	2	21.2545	63	1	21.2545	64	1	21.2545	69	6	21.2545	71	1	21.2545	57	1	21.2545	75	1	21.2545	39	1	21.2545	43	1
21.2667	82	0	21.2667	67	0	21.2667	54	3	21.2667	47	3	21.2667	70	5	21.2667	54	3	21.2667	77	2	21.2667	78	1	21.2667	77	3	21.2667	75	3	21.2667	43	2	21.2667	40	1
21.2789	79	3	21.2789	69	2	21.2789	56	3	21.2789	48	0	21.2789	63	2	21.2789	52	2	21.2789	61	5	21.2789	66	4	21.2789	81	1	21.2789	72	3	21.2789	33	3	21.2789	45	1
21.2911	75	0	21.2911	75	1	21.2911	54	5	21.2911	51	2	21.2911	71	0	21.2911	85	4	21.2911	78	2	21.2911	58	1	21.2911	78	2	21.2911	82	5	21.2911	54	1	21.2911	27	1
21.3034	79	2	21.3034	79	2	21.3034	64	7	21.3034	57	2	21.3034	72	1	21.3034	73	1	21.3034	88	3	21.3034	71	2	21.3034	75	3	21.3034	78	1	21.3034	48	4	21.3034	49	3
21.3156	79	4	21.3156	74	1	21.3156	68	3	21.3156	51	2	21.3156	62	2	21.3156	65	3	21.3156	49	2	21.3156	70	0	21.3156	78	1	21.3156	83	2	21.3156	50	0	21.3156	48	0
21.3278	73	2	21.3278	85	2	21.3278	66	1	21.3278	44	2	21.3278	63	0	21.3278	71	3	21.3278	74	3	21.3278	77	1	21.3278	59	2	21.3278	76	2	21.3278	29	1	21.3278	55	1
21.34	75	1	21.34	74	4	21.34	44	0	21.34	45	2	21.34	74	2	21.34	72	3	21.34	67	4	21.34	74	2	21.34	81	2	21.34	70	2	21.34	40	0	21.34	37	2
21.3522	76	3	21.3522	94	1	21.3522	60	3	21.3522	50	2	21.3522	80	1	21.3522	65	1	21.3522	70	3	21.3522	66	2	21.3522	79	3	21.3522	69	1	21.3522	47	3	21.3522	40	2
21.3644	78	1	21.3644	66	1	21.3644	53	2	21.3644	56	1	21.3644	65	1	21.3644	72	3	21.3644	62	1	21.3644	75	0	21.3644	71	1	21.3644	74	3	21.3644	51	1	21.3644	27	3
21.3767	70	2	21.3767	80	3	21.3767	56	4	21.3767	58	4	21.3767	62	4	21.3767	61	5	21.3767	56	0	21.3767	66	2	21.3767	66	1	21.3767	70	2	21.3767	39	3	21.3767	38	2
21.3889	67	1	21.3889	75	2	21.3889	61	2	21.3889	50	0	21.3889	69	4	21.3889	57	3	21.3889	58	4	21.3889	63	2	21.3889	75	1	21.3889	82	3	21.3889	37	4	21.3889	41	2
21.4011	78	1	21.4011	83	2	21.4011	47	2	21.4011	59	6	21.4011	65	3	21.4011	74	2	21.4011	64	5	21.4011	69	1	21.4011	88	1	21.4011	64	1	21.4011	33	5	21.4011	56	2
21.4133	57	1	21.4133	66	0	21.4133	48	1	21.4133	65	3	21.4133	89	1	21.4133	64	0	21.4133	61	2	21.4133	55	2	21.4133	65	0	21.4133	75	4	21.4133	45	1	21.4133	45	2
21.4255	68	1	21.4255	67	2	21.4255	66	2	21.4255	51	1	21.4255	72	3	21.4255	68	3	21.4255	67	2	21.4255	69	2	21.4255	89	2	21.4255	72	2	21.4255	49	2	21.4255	42	0
21.4377	90	0	21.4377	81	3	21.4377	51	2	21.4377	39	1	21.4377	63	2	21.4377	75	1	21.4377	50	4	21.4377	62	4	21.4377	77	1	21.4377	68	2	21.4377	38	1	21.4377	41	6
21.4499	82	3	21.4499	76	3	21.4499	44	2	21.4499	55	1	21.4499	69	2	21.4499	56	2	21.4499	61	4	21.4499	54	0	21.4499	62	1	21.4499	55	1	21.4499	40	6	21.4499	43	3
21.4622	53	0	21.4622	85	1	21.4622	41	3	21.4622	57	2	21.4622	75	2	21.4622	73	3	21.4622	59	2	21.4622	51	2	21.4622	82	4	21.4622	72	2	21.4622	46	1	21.4622	36	1
21.4744	79	2	21.4744	70	6	21.4744	63	2	21.4744	58	2	21.4744	62	1	21.4744	58	1	21.4744	66	4	21.4744	80	2	21.4744	84	2	21.4744	73	3	21.4744	58	0	21.4744	42	3
21.4866	72	1	21.4866	78	1	21.4866	50	1	21.4866	54	0	21.4866	64	5	21.4866	67	1	21.4866	63	5	21.4866	69	4	21.4866	77	1	21.4866	77	1	21.4866	37	0	21.4866	49	2
21.4988	73	4	21.4988	90	3	21.4988	56	2	21.4988	47	3	21.4988	64	2	21.4988	63	3	21.4988	63	2	21.4988	75	1	21.4988	61	2	21.4988	62	0	21.4988	38	2	21.4988	42	2
21.511	66	1	21.511	79	2	21.511	59	2	21.511	53	2	21.511	70	0	21.511	62	1	21.511	65	4	21.511	73	1	21.511	64	1	21.511	59	1	21.511	42	5	21.511	45	2
21.5232	68	3	21.5232	68	2	21.5232	66	3	21.5232	45	0	21.5232	64	0	21.5232	54	1	21.5232	65	6	21.5232	64	0	21.5232	82	3	21.5232	65	2	21.5232	38	4	21.5232	36	0
21.5355	62	2	21.5355	69	2	21.5355	66	2	21.5355	57	2	21.5355	73	1	21.5355	72	2	21.5355	66	3	21.5355	52	1	21.5355	78	1	21.5355	78	0	21.5355	49	2	21.5355	33	1
21.5477	79	1	21.5477	65	2	21.5477	60	2	21.5477	60	1	21.5477	60	1	21.5477	70	1	21.5477	61	2	21.5477	64	2	21.5477	69	2	21.5477	78	3	21.5477	44	2	21.5477	47	0
21.5599	78	1	21.5599	83	0	21.5599	56	0	21.5599	62	2	21.5599	72	2	21.5599	70	3	21.5599	76	3	21.5599	65	2	21.5599	65	0	21.5599	83	3	21.5599	44	1	21.5599	46	1
21.5721	66	4	21.5721	78	3	21.5721	54	1	21.5721	58	2	21.5721	72	1	21.5721	66	1	21.5721	65	6	21.5721	69	3	21.5721	65	4	21.5721	69	0	21.5721	33	2	21.5721	47	4
21.5843	73	3	21.5843	77	2	21.5843	64	2	21.5843	43	3	21.5843	64	1	21.5843	65	2	21.5843	56	2	21.5843	66	1	21.5843	81	0	21.5843	69	4	21.5843	27	1	21.5843	31	4
21.5965	71	0	21.5965	72	1	21.5965	57	0	21.5965	53	2	21.5965	74	5	21.5965	60	4	21.5965	46	3	21.5965	65	0	21.5965	79	1	21.5965	73	6	21.5965	42	3	21.5965	40	1
21.6087	61	3	21.6087	69	4	21.6087	43	1	21.6087	53	2	21.6087	53	0	21.6087	56	2	21.6087	68	4	21.6087	74	2	21.6087	77	0	21.6087	73	3	21.6087	40	2	21.6087	40	3
21.621	80	2	21.621	80	1	21.621	57	4	21.621	46	1	21.621	83	1	21.621	53	2	21.621	60	4	21.621	60	0	21.621	70	2	21.621	70	1	21.621	38	4	21.621	40	2
21.6332	84	3	21.6332	84	5	21.6332	44	5	21.6332	46	1	21.6332	72	3	21.6332	64	4	21.6332	59	3	21.6332	72	3	21.6332	62	3	21.6332	66	4	21.6332	37	1	21.6332	38	3
21.6454	68	1	21.6454	73	4	21.6454	39	3	21.6454	51	1	21.6454	62	0	21.6454	68	2	21.6454	56	3	21.6454	65	3	21.6454	79	1	21.6454	84	5	21.6454	45	0	21.6454	41	0
21.6576	70	2	21.6576	74	1	21.6576	43	7	21.6576	48	1	21.6576	82	1	21.6576	50	2	21.6576	56	2	21.6576	56	1	21.6576	63	2	21.6576	83	2	21.6576	35	1	21.6576	43	0
21.6698	51	4	21.6698	78	4	21.6698	42	2	21.6698	55	3	21.6698	48	3	21.6698	58	2	21.6698	58	2	21.6698	63	2	21.6698	68	1	21.6698	71	3	21.6698	38	1	21.6698	35	2
21.682	62	4	21.682	66	2	21.682	68	1	21.682	44	0	21.682	70	0	21.682	77	2	21.682	49	3	21.682	54	2	21.682	74	3	21.682	56	3	21.682	30	3	21.682	43	2
21.6942	66	3	21.6942	77	5	21.6942	57	5	21.6942	55	1	21.6942	59	1	21.6942	72	1	21.6942	49	3	21.6942	65	3	21.6942	65	3	21.6942	65	4	21.6942	28	6	21.6942	38	1
21.7065	59	2	21.7065	67	3	21.7065	42	0	21.7065	54	3	21.7065	69	0	21.7065	57	4	21.7065	56	4	21.7065	56	1	21.7065	67	1	21.7065	73	2	21.7065	39	0	21.7065	42	1
21.7187	71	4	21.7187	61	2	21.7187	51	1	21.7187	50	1	21.7187	58	2	21.7187	58	4	21.7187	58	2	21.7187	74	2	21.7187	71	2	21.7187	75	4	21.7187	46	4	21.7187	29	3
21.7309	70	2	21.7309	70	2	21.7309	53	5	21.7309	51	3	21.7309	58	3	21.7309	58	2	21.7309	66	1	21.7309	66	1	21.7309	58	4	21.7309	85	2	21.7309	39	1	21.7309	47	2
21.7431	58	2	21.7431	67	1	21.7431	49	6	21.7431	49	0	21.7431	59	5	21.7431	65	2	21.7431	59	3	21.7431	56	1	21.7431	69	2	21.7431	76	3	21.7431	43	2	21.7431	37	2
21.7553	78	3	21.7553	62	3	21.7553	62	2	21.7553	44	3	21.7553	58	0	21.7553	60	0	21.7553	63	6	21.7553	73	5	21.7553	67	0	21.7553	81	5	21.7553	51	1	21.7553	31	2
21.7675	71	0	21.7675	52	0	21.7675	61	1	21.7675	46	4	21.7675	58	1	21.7675	63	3	21.7675	67	2	21.7675	69	2	21.7675	73	0	21.7675	58	0	21.7675	39	1	21.7675	36	4
21.7797	64	1	21.7797	55	1	21.7797	41	0	21.7797	50	0	21.7797	58	1	21.7797	75	1	21.7797	64	2	21.7797	55	0	21.7797	70	0	21.7797	63	2	21.7797	48	2	21.7797	30	1
21.792	71	2	21.792	67	3	21.792	52	6	21.792	51	6	21.792	67	1	21.792	59	4	21.792	52	4	21.792	70	1	21.792	61	2	21.792	62	2	21.792	37	2	21.792	32	1
21.8042	55	2	21.8042	65	0	21.8042	66	2	21.8042	57	2	21.8042	46	3	21.8042	72	1	21.8042	58	3	21.8042	62	1	21.8042	76	1	21.8042	68	2	21.8042	54	3	21.8042	36	2
21.8164	69	2	21.8164	71	3	21.8164	51	1	21.8164	46	3	21.8164	69	1	21.8164	64	5	21.8164	67	3	21.8164	52	4	21.8164	65	4	21.8164	73	3	21.8164	47	5	21.8164	35	0
21.8286	61	2	21.8286	60	3	21.8286	55	0	21.8286	37	1	21.8286	63	0	21.8286	50	3	21.8286	64	3	21.8286	79	1	21.8286	72	1	21.8286	56	4	21.8286	34	4	21.8286	28	3
21.8408	60	2	21.8408	78	2	21.8408	49	0	21.8408	41	3	21.8408	53	0	21.8408	47	0	21.8408	58	2	21.8408	45	2	21.8408	61	5	21.8408	78	4	21.8408	24	1	21.8408	38	2
21.853	79	1	21.853	70	1	21.853	43	3	21.853	56	4	21.853	56	3	21.853	59	0	21.853	48	6	21.853	66	0	21.853	61	2	21.853	60	3	21.853	40	2	21.853	37	3
21.8653	69	1	21.8653	65	2	21.8653	46	4	21.8653	47	0	21.8653	60	0	21.8653	70	0	21.8653	54	2	21.8653	56	3	21.8653	75	3	21.8653	66	0	21.8653	32	1	21.8653	36	0
21.8775	71	1	21.8775	82	0	21.8775	47	1	21.8775	45	3	21.8775	69	2	21.8775	49	1	21.8775	64	2	21.8775	61	1	21.8775	76	2	21.8775	72	3	21.8775	31	2	21.8775	42	2
21.8897	56	2	21.8897	53	2	21.8897	68	3	21.8897	47	3	21.8897	71	2	21.8897	58	2	21.8897	50	1	21.8897	58	2	21.8897	58	3	21.8897	84	3	21.8897	56	1	21.8897	40	4
21.9019	58	3	21.9019	67	3	21.9019	56	1	21.9019	53	2	21.9019	77	1	21.9019	63	1	21.9019	59	1	21.9019	51	4	21.9019	68	2	21.9019	51	3	21.9019	29	1	21.9019	36	3
21.9141	65	0	21.9141	65	0	21.9141	51	4	21.9141	44	3	21.9141	64	2	21.9141	67	2	21.9141	53	2	21.9141	68	0	21.9141	70	1	21.9141	70	1	21.9141	38	2	21.9141	46	1
21.9263	62	2	21.9263	63	2	21.9263	45	1	21.9263	49	0	21.9263	64	0	21.9263	51	0	21.9263	59	3	21.9263	74	3	21.9263	81	0	21.9263	47	3	21.9263	45	5	21.9263	39	4
21.9385	46	6	21.9385	66	4	21.9385	41	1	21.9385	42	1	21.9385	73	1	21.9385	48	1	21.9385	62	0	21.9385	52	1	21.9385	79	4	21.9385	68	2	21.9385	35	2	21.9385	28	2
21.9508	70	0	21.9508	75	2	21.9508	51	1	21.9508	40	3	21.9508	52	3	21.9508	66	3	21.9508	69	4	21.9508	59	2	21.9508	78	2	21.9508	51	5	21.9508	38	6	21.9508	42	1
21.963	65	0	21.963	65	2	21.963	42	0	21.963	38	3	21.963	66	4	21.963	57	1	21.963	42	3	21.963	53	3	21.963	82	3	21.963	59	2	21.963	39	2	21.963	34	3
21.9752	83	2	21.9752	67	3	21.9752	49	2	21.9752	55	2	21.9752	60	2	21.9752	53	3	21.9752	52	2	21.9752	63	1	21.9752	78	0	21.9752	79	0	21.9752	39	2	21.9752	42	2
21.9874	77	1	21.9874	55	1	21.9874	42	1	21.9874	53	2	21.9874	58	0	21.9874	52	3	21.9874	52	1	21.9874	64	0	21.9874	69	6	21.9874	43	3	21.9874	41	0	21.9874	39	3
21.9996	63	2	21.9996	55	2	21.9996	48	3	21.9996	42	3	21.9996	58	2	21.9996	75	0	21.9996	53	4	21.9996	66	5	21.9996	68	1	21.9996	61	1	21.9996	41	1	21.9996	27	1
22.0118	65	2	22.0118	59	4	22.0118	44	1	22.0118	39	2	22.0118	59	5	22.0118	43	0	22.0118	47	4	22.0118	48	2	22.0118	54	4	22.0118	64	3	22.0118	23	1	22.0118	35	4
22.0241	68	1	22.0241	72	2	22.0241	43	4	22.0241	52	2	22.0241	53	3	22.0241	57	3	22.0241	55	1	22.0241	55	2	22.0241	58	1	22.0241	72	1	22.0241	38	1	22.0241	44	0
22.0363	58	1	22.0363	69	4	22.0363	54	1	22.0363	47	3	22.0363	65	1	22.0363	64	3	22.0363	54	1	22.0363	50	2	22.0363	51	0	22.0363	60	2	22.0363	44	1	22.0363	42	2
22.0485	68	4	22.0485	48	2	22.0485	50	6	22.0485	51	3	22.0485	40	2	22.0485	46	2	22.0485	59	2	22.0485	56	3	22.0485	71	1	22.0485	58	8	22.0485	44	1	22.0485	36	4
22.0607	65	2	22.0607	49	2	22.0607	45	1	22.0607	40	5	22.0607	60	0	22.0607	53	1	22.0607	56	4	22.0607	48	2	22.0607	69	1	22.0607	62	1	22.0607	42	2	22.0607	35	1
22.0729	59	1	22.0729	51	1	22.0729	44	3	22.0729	63	4	22.0729	58	1	22.0729	54	3	22.0729	58	4	22.0729	46	0	22.0729	48	0	22.0729	62	7	22.0729	38	2	22.0729	28	3
22.0851	80	0	22.0851	69	2	22.0851	40	2	22.0851	43	0	22.0851	53	1	22.0851	66	0	22.0851	39	2	22.0851	63	0	22.0851	61	1	22.0851	72	1	22.0851	36	2	22.0851	43	0
22.0973	65	0	22.0973	60	3	22.0973	42	2	22.0973	49	4	22.0973	62	4	22.0973	46	1	22.0973	57	4	22.0973	55	2	22.0973	59	2	22.0973	52	2	22.0973	40	3	22.0973	35	2
22.1096	52	3	22.1096	65	2	22.1096	49	0	22.1096	33	0	22.1096	56	1	22.1096	63	3	22.1096	45	1	22.1096	65	3	22.1096	63	3	22.1096	65	4	22.1096	40	5	22.1096	49	2
22.1218	61	2	22.1218	57	2	22.1218	60	2	22.1218	42	5	22.1218	59	5	22.1218	51	1	22.1218	71	3	22.1218	50	1	22.1218	79	1	22.1218	57	3	22.1218	37	1	22.1218	36	5
22.134	67	4	22.134	68	2	22.134	47	5	22.134	50	2	22.134	59	2	22.134	52	0	22.134	62	0	22.134	38	3	22.134	74	5	22.134	56	0	22.134	31	1	22.134	31	1
22.1462	70	2	22.1462	72	1	22.1462	40	0	22.1462	42	3	22.1462	61	3	22.1462	60	0	22.1462	48	6	22.1462	64	0	22.1462	65	0	22.1462	64	3	22.1462	40	1	22.1462	44	4
22.1584	61	1	22.1584	70	1	22.1584	45	3	22.1584	43	0	22.1584	57	2	22.1584	72	5	22.1584	45	1	22.1584	57	3	22.1584	54	0	22.1584	69	1	22.1584	38	0	22.1584	28	3
22.1706	65	2	22.1706	57	3	22.1706	51	1	22.1706	47	2	22.1706	60	2	22.1706	51	4	22.1706	43	5	22.1706	41	4	22.1706	59	1	22.1706	54	2	22.1706	30	2	22.1706	37	2
22.1828	49	4	22.1828	65	2	22.1828	37	1	22.1828	44	2	22.1828	58	4	22.1828	34	2	22.1828	50	4	22.1828	63	3	22.1828	60	2	22.1828	69	4	22.1828	38	0	22.1828	36	1
22.1951	54	1	22.1951	68	5	22.1951	64	4	22.1951	49	1	22.1951	42	1	22.1951	64	3	22.1951	49	5	22.1951	67	2	22.1951	69	3	22.1951	59	2	22.1951	29	2	22.1951	33	1
22.2073	61	3	22.2073	50	3	22.2073	43	2	22.2073	47	2	22.2073	46	3	22.2073	50	1	22.2073	52	5	22.2073	57	3	22.2073	67	3	22.2073	73	3	22.2073	30	2	22.2073	29	0
22.2195	67	3	22.2195	54	1	22.2195	50	2	22.2195	39	0	22.2195	66	1	22.2195	49	2	22.2195	43	2	22.2195	58	3	22.2195	55	2	22.2195	53	4	22.2195	23	2	22.2195	26	1
22.2317	56	3	22.2317	57	0	22.2317	44	0	22.2317	52	1	22.2317	59	2	22.2317	60	2	22.2317	52	1	22.2317	62	1	22.2317	57	2	22.2317	58	1	22.2317	28	2	22.2317	29	4
22.2439	60	3	22.2439	46	2	22.2439	53	1	22.2439	50	1	22.2439	59	1	22.2439	47	1	22.2439	62	3	22.2439	65	1	22.2439	55	0	22.2439	53	2	22.2439	35	1	22.2439	38	1
22.2562	67	1	22.2562	67	2	22.2562	35	1	22.2562	44	3	22.2562	52	0	22.2562	68	3	22.2562	57	3	22.2562	56	4	22.2562	66	3	22.2562	61	0	22.2562	34	4	22.2562	32	1
22.2684	71	3	22.2684	66	1	22.2684	46	2	22.2684	44	5	22.2684	41	3	22.2684	57	2	22.2684	42	4	22.2684	55	3	22.2684	63	3	22.2684	71	3	22.2684	28	5	22.2684	26	0
22.2806	72	3	22.2806	60	3	22.2806	44	2	22.2806	42	1	22.2806	56	1	22.2806	49	2	22.2806	49	2	22.2806	43	0	22.2806	58	2	22.2806	52	2	22.2806	38	5	22.2806	41	3
22.2928	55	3	22.2928	52	2	22.2928	38	2	22.2928	57	4	22.2928	56	2	22.2928	61	3	22.2928	49	4	22.2928	63	0	22.2928	54	2	22.2928	45	2	22.2928	44	1	22.2928	30	3
22.305	54	3	22.305	79	2	22.305	43	0	22.305	41	2	22.305	62	2	22.305	48	4	22.305	55	4	22.305	53	4	22.305	67	4	22.305	58	3	22.305	20	3	22.305	36	3
22.3172	52	2	22.3172	73	3	22.3172	38	1	22.3172	35	2	22.3172	47	1	22.3172	49	3	22.3172	46	1	22.3172	61	1	22.3172	58	3	22.3172	53	0	22.3172	29	0	22.3172	29	2
22.3294	66	0	22.3294	48	0	22.3294	48	5	22.3294	35	3	22.3294	53	1	22.3294	56	2	22.3294	36	3	22.3294	40	3	22.3294	61	1	22.3294	48	2	22.3294	41	2	22.3294	33	3
22.3417	64	1	22.3417	65	3	22.3417	54	4	22.3417	34	5	22.3417	51	3	22.3417	58	4	22.3417	46	6	22.3417	47	3	22.3417	63	6	22.3417	65	2	22.3417	28	2	22.3417	33	2
22.3539	63	8	22.3539	68	0	22.3539	39	4	22.3539	52	1	22.3539	66	2	22.3539	53	3	22.3539	53	7	22.3539	52	2	22.3539	56	3	22.3539	52	2	22.3539	27	2	22.3539	34	0
22.3661	66	0	22.3661	60	1	22.3661	36	1	22.3661	48	6	22.3661	57	3	22.3661	42	3	22.3661	40	4	22.3661	71	1	22.3661	62	2	22.3661	59	2	22.3661	34	0	22.3661	26	2
22.3783	67	2	22.3783	72	5	22.3783	41	5	22.3783	46	4	22.3783	59	2	22.3783	64	2	22.3783	56	3	22.3783	60	6	22.3783	63	1	22.3783	54	0	22.3783	29	3	22.3783	30	3
22.3905	47	1	22.3905	72	1	22.3905	39	1	22.3905	42	3	22.3905	60	1	22.3905	37	3	22.3905	54	2	22.3905	40	3	22.3905	64	5	22.3905	44	2	22.3905	39	0	22.3905	47	2
22.4027	60	3	22.4027	65	2	22.4027	52	1	22.4027	44	5	22.4027	56	2	22.4027	33	1	22.4027	50	1	22.4027	54	1	22.4027	62	2	22.4027	63	3	22.4027	37	2	22.4027	36	0
22.4149	49	5	22.4149	65	1	22.4149	43	1	22.4149	40	0	22.4149	77	1	22.4149	52	2	22.4149	39	4	22.4149	47	1	22.4149	51	1	22.4149	63	2	22.4149	24	2	22.4149	27	2
22.4272	54	0	22.4272	59	4	22.4272	42	2	22.4272	57	2	22.4272	47	5	22.4272	67	2	22.4272	44	1	22.4272	40	3	22.4272	50	1	22.4272	52	2	22.4272	33	0	22.4272	35	0
22.4394	53	1	22.4394	64	3	22.4394	55	2	22.4394	49	1	22.4394	50	2	22.4394	44	2	22.4394	53	2	22.4394	59	1	22.4394	49	1	22.4394	53	1	22.4394	29	1	22.4394	32	2
22.4516	64	2	22.4516	66	2	22.4516	39	1	22.4516	42	1	22.4516	50	2	22.4516	48	1	22.4516	62	4	22.4516	45	3	22.4516	54	1	22.4516	46	0	22.4516	36	3	22.4516	28	1
22.4638	42	0	22.4638	47	2	22.4638	37	2	22.4638	40	2	22.4638	61	4	22.4638	50	0	22.4638	58	2	22.4638	36	1	22.4638	65	3	22.4638	52	2	22.4638	41	1	22.4638	36	0
22.476	64	3	22.476	56	4	22.476	36	3	22.476	55	4	22.476	58	1	22.476	54	0	22.476	61	2	22.476	46	2	22.476	60	0	22.476	60	4	22.476	35	1	22.476	25	0
22.4882	62	0	22.4882	53	3	22.4882	45	1	22.4882	40	3	22.4882	43	6	22.4882	52	1	22.4882	54	6	22.4882	50	2	22.4882	53	2	22.4882	61	4	22.4882	33	4	22.4882	34	1
22.5005	49	0	22.5005	56	1	22.5005	53	1	22.5005	45	2	22.5005	59	3	22.5005	60	3	22.5005	53	2	22.5005	41	1	22.5005	55	2	22.5005	44	0	22.5005	31	1	22.5005	35	3
22.5127	56	2	22.5127	66	1	22.5127	34	5	22.5127	43	2	22.5127	52	2	22.5127	53	2	22.5127	43	3	22.5127	42	0	22.5127	54	3	22.5127	55	3	22.5127	28	0	22.5127	34	2
22.5249	46	4	22.5249	56	3	22.5249	37	2	22.5249	36	1	22.5249	68	0	22.5249	51	1	22.5249	48	5	22.5249	66	0	22.5249	55	1	22.5249	53	2	22.5249	37	4	22.5249	34	0
22.5371	70	2	22.5371	57	1	22.5371	43	2	22.5371	26	1	22.5371	61	1	22.5371	41	1	22.5371	44	7	22.5371	61	4	22.5371	72	2	22.5371	67	1	22.5371	44	1	22.5371	25	1
22.5493	50	2	22.5493	64	5	22.5493	47	3	22.5493	35	0	22.5493	47	2	22.5493	52	4	22.5493	51	4	22.5493	56	4	22.5493	53	6	22.5493	52	2	22.5493	37	1	22.5493	41	3
22.5615	42	1	22.5615	63	3	22.5615	39	3	22.5615	36	1	22.5615	58	0	22.5615	58	3	22.5615	53	3	22.5615	46	3	22.5615	54	2	22.5615	45	1	22.5615	35	2	22.5615	28	5
22.5737	54	1	22.5737	63	0	22.5737	46	1	22.5737	42	0	22.5737	67	1	22.5737	56	4	22.5737	49	2	22.5737	42	4	22.5737	47	1	22.5737	53	0	22.5737	34	6	22.5737	35	5
22.586	44	3	22.586	62	0	22.586	46	3	22.586	46	3	22.586	53	4	22.586	52	1	22.586	45	2	22.586	41	3	22.586	68	2	22.586	60	0	22.586	29	3	22.586	30	3
22.5982	53	1	22.5982	46	2	22.5982	44	2	22.5982	42	2	22.5982	48	0	22.5982	52	1	22.5982	50	2	22.5982	65	3	22.5982	52	1	22.5982	52	5	22.5982	34	5	22.5982	22	1
22.6104	37	1	22.6104	49	3	22.6104	41	3	22.6104	36	0	22.6104	41	1	22.6104	55	3	22.6104	45	2	22.6104	58	0	22.6104	51	2	22.6104	45	3	22.6104	34	1	22.6104	31	6
22.6226	43	1	22.6226	49	2	22.6226	38	4	22.6226	46	4	22.6226	52	2	22.6226	49	2	22.6226	38	2	22.6226	47	2	22.6226	65	1	22.6226	57	2	22.6226	21	5	22.6226	32	3
22.6348	64	0	22.6348	55	3	22.6348	36	1	22.6348	35	2	22.6348	45	2	22.6348	42	1	22.6348	48	5	22.6348	54	2	22.6348	45	1	22.6348	62	1	22.6348	32	2	22.6348	34	2
22.647	60	0	22.647	50	6	22.647	41	0	22.647	29	1	22.647	51	4	22.647	54	1	22.647	41	3	22.647	44	2	22.647	62	1	22.647	53	4	22.647	29	3	22.647	29	0
22.6593	53	2	22.6593	61	0	22.6593	50	2	22.6593	25	3	22.6593	58	0	22.6593	58	0	22.6593	45	3	22.6593	39	1	22.6593	52	3	22.6593	56	1	22.6593	39	4	22.6593	30	1
22.6715	56	1	22.6715	46	2	22.6715	33	0	22.6715	45	2	22.6715	38	2	22.6715	43	3	22.6715	49	2	22.6715	48	2	22.6715	60	2	22.6715	58	2	22.6715	43	3	22.6715	35	6
22.6837	57	3	22.6837	45	2	22.6837	49	1	22.6837	29	0	22.6837	54	0	22.6837	45	1	22.6837	53	1	22.6837	45	4	22.6837	43	2	22.6837	41	1	22.6837	29	5	22.6837	36	3
22.6959	70	2	22.6959	61	2	22.6959	37	2	22.6959	35	1	22.6959	54	0	22.6959	45	0	22.6959	58	0	22.6959	46	2	22.6959	55	1	22.6959	51	4	22.6959	37	3	22.6959	37	2
22.7081	56	1	22.7081	60	2	22.7081	30	3	22.7081	29	1	22.7081	38	0	22.7081	55	3	22.7081	47	3	22.7081	49	1	22.7081	58	1	22.7081	38	4	22.7081	35	1	22.7081	29	1
22.7203	55	2	22.7203	53	2	22.7203	33	3	22.7203	37	2	22.7203	42	1	22.7203	49	3	22.7203	51	7	22.7203	52	3	22.7203	47	0	22.7203	48	1	22.7203	37	0	22.7203	25	3
22.7325	50	0	22.7325	41	1	22.7325	46	3	22.7325	31	4	22.7325	45	4	22.7325	51	5	22.7325	45	3	22.7325	47	4	22.7325	70	1	22.7325	48	2	22.7325	35	4	22.7325	30	2
22.7447	59	2	22.7447	54	5	22.7447	36	0	22.7447	21	1	22.7447	51	3	22.7447	52	1	22.7447	51	2	22.7447	41	2	22.7447	50	3	22.7447	52	0	22.7447	37	4	22.7447	34	4
22.757	59	3	22.757	52	4	22.757	36	4	22.757	37	2	22.757	51	1	22.757	47	1	22.757	46	0	22.757	42	2	22.757	58	1	22.757	49	2	22.757	24	3	22.757	24	2
22.7692	60	1	22.7692	55	4	22.7692	42	1	22.7692	35	1	22.7692	46	2	22.7692	37	4	22.7692	50	4	22.7692	51	2	22.7692	74	6	22.7692	51	2	22.7692	29	5	22.7692	33	4
22.7814	45	3	22.7814	49	2	22.7814	51	3	22.7814	45	3	22.7814	38	3	22.7814	52	2	22.7814	44	3	22.7814	55	1	22.7814	42	1	22.7814	53	2	22.7814	28	0	22.7814	34	1
22.7936	56	1	22.7936	48	0	22.7936	31	2	22.7936	42	3	22.7936	59	2	22.7936	41	2	22.7936	52	1	22.7936	45	3	22.7936	59	0	22.7936	50	3	22.7936	30	1	22.7936	27	2
22.8058	49	2	22.8058	65	4	22.8058	33	7	22.8058	34	3	22.8058	40	3	22.8058	41	2	22.8058	53	4	22.8058	55	3	22.8058	55	2	22.8058	38	3	22.8058	31	3	22.8058	30	2
22.818	39	1	22.818	46	3	22.818	42	5	22.818	34	0	22.818	41	4	22.818	43	1	22.818	48	4	22.818	48	1	22.818	50	1	22.818	46	1	22.818	41	2	22.818	33	1
22.8303	55	2	22.8303	61	1	22.8303	44	3	22.8303	51	1	22.8303	51	1	22.8303	50	2	22.8303	46	3	22.8303	51	3	22.8303	56	3	22.8303	42	2	22.8303	38	0	22.8303	37	3
22.8425	54	1	22.8425	47	0	22.8425	38	1	22.8425	44	1	22.8425	53	0	22.8425	47	0	22.8425	48	2	22.8425	52	0	22.8425	53	3	22.8425	52	3	22.8425	27	5	22.8425	24	2
22.8547	50	3	22.8547	70	3	22.8547	49	4	22.8547	39	1	22.8547	40	2	22.8547	44	3	22.8547	59	2	22.8547	55	2	22.8547	70	3	22.8547	56	1	22.8547	30	4	22.8547	33	3
22.8669	49	0	22.8669	42	4	22.8669	38	1	22.8669	42	3	22.8669	49	1	22.8669	50	2	22.8669	51	4	22.8669	54	0	22.8669	53	2	22.8669	53	2	22.8669	37	2	22.8669	22	1
22.8791	42	0	22.8791	51	3	22.8791	51	3	22.8791	32	1	22.8791	40	2	22.8791	27	4	22.8791	42	2	22.8791	47	2	22.8791	43	2	22.8791	50	1	22.8791	43	1	22.8791	26	1
22.8913	53	3	22.8913	54	1	22.8913	32	3	22.8913	35	0	22.8913	50	3	22.8913	47	0	22.8913	52	1	22.8913	45	3	22.8913	64	4	22.8913	46	1	22.8913	21	1	22.8913	31	4
22.9035	60	2	22.9035	54	1	22.9035	31	4	22.9035	20	1	22.9035	49	1	22.9035	51	1	22.9035	42	3	22.9035	58	1	22.9035	60	3	22.9035	54	2	22.9035	29	2	22.9035	36	2
22.9158	50	4	22.9158	62	3	22.9158	42	2	22.9158	29	1	22.9158	53	0	22.9158	47	2	22.9158	49	1	22.9158	36	0	22.9158	56	2	22.9158	40	0	22.9158	38	0	22.9158	19	0
22.928	63	0	22.928	41	2	22.928	34	4	22.928	41	1	22.928	50	2	22.928	48	1	22.928	49	1	22.928	43	0	22.928	41	2	22.928	50	1	22.928	36	3	22.928	27	0
22.9402	55	3	22.9402	51	4	22.9402	49	3	22.9402	44	5	22.9402	45	1	22.9402	34	1	22.9402	39	1	22.9402	48	0	22.9402	46	1	22.9402	49	4	22.9402	27	3	22.9402	21	2
22.9524	35	1	22.9524	50	0	22.9524	26	4	22.9524	34	1	22.9524	48	4	22.9524	49	3	22.9524	51	2	22.9524	45	1	22.9524	49	2	22.9524	36	1	22.9524	29	0	22.9524	23	0
22.9646	65	1	22.9646	55	2	22.9646	33	1	22.9646	38	2	22.9646	54	2	22.9646	45	1	22.9646	51	0	22.9646	48	1	22.9646	56	2	22.9646	50	3	22.9646	40	2	22.9646	32	1
22.9768	52	3	22.9768	60	0	22.9768	28	2	22.9768	31	2	22.9768	34	2	22.9768	31	3	22.9768	33	1	22.9768	29	3	22.9768	55	1	22.9768	43	0	22.9768	29	2	22.9768	26	1
22.9891	43	1	22.9891	47	1	22.9891	39	2	22.9891	46	2	22.9891	35	5	22.9891	47	2	22.9891	45	1	22.9891	48	0	22.9891	53	5	22.9891	44	0	22.9891	36	2	22.9891	24	0
23.0013	49	1	23.0013	64	3	23.0013	53	4	23.0013	33	3	23.0013	40	3	23.0013	44	1	23.0013	31	1	23.0013	50	4	23.0013	62	2	23.0013	48	3	23.0013	26	1	23.0013	18	0
23.0135	46	3	23.0135	49	3	23.0135	30	3	23.0135	41	2	23.0135	38	2	23.0135	32	2	23.0135	44	4	23.0135	42	4	23.0135	45	1	23.0135	53	1	23.0135	26	1	23.0135	20	0
23.0257	46	0	23.0257	54	1	23.0257	33	4	23.0257	30	1	23.0257	41	3	23.0257	47	0	23.0257	46	4	23.0257	45	3	23.0257	61	4	23.0257	42	0	23.0257	27	2	23.0257	16	1
23.0379	55	2	23.0379	51	1	23.0379	30	3	23.0379	39	2	23.0379	37	3	23.0379	56	0	23.0379	41	3	23.0379	57	5	23.0379	48	2	23.0379	44	0	23.0379	36	5	23.0379	28	0
23.0501	43	3	23.0501	58	4	23.0501	38	0	23.0501	40	4	23.0501	46	6	23.0501	41	1	23.0501	49	3	23.0501	45	5	23.0501	47	1	23.0501	46	2	23.0501	35	3	23.0501	28	4
23.0623	51	4	23.0623	50	5	23.0623	39	2	23.0623	42	2	23.0623	46	2	23.0623	49	0	23.0623	41	3	23.0623	44	2	23.0623	63	1	23.0623	53	4	23.0623	22	2	23.0623	35	1
23.0746	41	4	23.0746	55	3	23.0746	41	2	23.0746	30	0	23.0746	48	2	23.0746	38	3	23.0746	49	1	23.0746	35	2	23.0746	51	3	23.0746	55	2	23.0746	34	3	23.0746	28	4
23.0868	45	1	23.0868	54	1	23.0868	26	0	23.0868	31	2	23.0868	45	1	23.0868	47	3	23.0868	40	2	23.0868	41	0	23.0868	45	2	23.0868	48	2	23.0868	29	3	23.0868	35	2
23.099	50	5	23.099	52	5	23.099	28	2	23.099	27	4	23.099	47	2	23.099	52	1	23.099	35	2	23.099	27	3	23.099	57	2	23.099	53	0	23.099	34	2	23.099	23	2
23.1112	41	1	23.1112	47	0	23.1112	27	3	23.1112	35	0	23.1112	48	2	23.1112	47	2	23.1112	49	6	23.1112	32	2	23.1112	44	0	23.1112	45	3	23.1112	29	0	23.1112	34	1
23.1234	60	2	23.1234	51	3	23.1234	38	2	23.1234	35	2	23.1234	45	1	23.1234	47	1	23.1234	41	5	23.1234	49	2	23.1234	48	4	23.1234	39	3	23.1234	33	0	23.1234	30	1
23.1356	56	1	23.1356	52	1	23.1356	44	0	23.1356	46	2	23.1356	46	1	23.1356	39	0	23.1356	50	1	23.1356	33	3	23.1356	50	4	23.1356	45	4	23.1356	26	2	23.1356	37	0
23.1479	48	1	23.1479	45	1	23.1479	30	1	23.1479	27	1	23.1479	52	2	23.1479	37	1	23.1479	41	3	23.1479	41	0	23.1479	51	3	23.1479	51	4	23.1479	20	3	23.1479	27	2
23.1601	39	1	23.1601	35	1	23.1601	35	4	23.1601	33	2	23.1601	36	2	23.1601	35	1	23.1601	48	2	23.1601	34	2	23.1601	48	3	23.1601	47	0	23.1601	23	0	23.1601	21	1
23.1723	44	3	23.1723	34	1	23.1723	29	3	23.1723	36	2	23.1723	50	0	23.1723	48	2	23.1723	61	3	23.1723	49	0	23.1723	45	3	23.1723	50	1	23.1723	25	1	23.1723	27	2
23.1845	37	3	23.1845	44	2	23.1845	29	2	23.1845	25	2	23.1845	52	0	23.1845	44	3	23.1845	35	1	23.1845	45	1	23.1845	51	0	23.1845	51	3	23.1845	30	3	23.1845	35	1
23.1967	52	1	23.1967	51	4	23.1967	33	1	23.1967	43	1	23.1967	34	2	23.1967	47	2	23.1967	41	4	23.1967	58	5	23.1967	48	1	23.1967	54	1	23.1967	24	2	23.1967	30	1
23.2089	53	1	23.2089	51	1	23.2089	38	3	23.2089	30	2	23.2089	45	4	23.2089	39	2	23.2089	40	3	23.2089	35	4	23.2089	49	0	23.2089	45	0	23.2089	15	3	23.2089	24	2
23.2212	47	4	23.2212	39	0	23.2212	38	2	23.2212	35	3	23.2212	39	0	23.2212	38	3	23.2212	48	4	23.2212	43	2	23.2212	45	5	23.2212	57	2	23.2212	28	1	23.2212	21	3
23.2334	41	1	23.2334	43	2	23.2334	38	4	23.2334	33	5	23.2334	40	0	23.2334	41	1	23.2334	52	2	23.2334	40	0	23.2334	50	2	23.2334	39	2	23.2334	18	1	23.2334	28	2
23.2456	55	3	23.2456	48	2	23.2456	40	1	23.2456	37	3	23.2456	44	0	23.2456	37	2	23.2456	44	3	23.2456	36	0	23.2456	55	2	23.2456	42	1	23.2456	25	2	23.2456	25	0
23.2578	50	1	23.2578	51	3	23.2578	34	3	23.2578	31	2	23.2578	48	0	23.2578	50	3	23.2578	43	1	23.2578	40	2	23.2578	52	3	23.2578	47	2	23.2578	22	1	23.2578	27	1
23.27	41	2	23.27	49	1	23.27	41	4	23.27	27	1	23.27	29	2	23.27	42	4	23.27	38	4	23.27	49	2	23.27	49	0	23.27	30	6	23.27	19	1	23.27	32	3
23.2822	46	2	23.2822	43	2	23.2822	36	2	23.2822	25	1	23.2822	36	1	23.2822	44	2	23.2822	36	5	23.2822	32	2	23.2822	58	0	23.2822	38	3	23.2822	32	3	23.2822	23	4
23.2944	42	2	23.2944	55	0	23.2944	29	3	23.2944	29	2	23.2944	43	1	23.2944	43	2	23.2944	39	5	23.2944	55	2	23.2944	42	1	23.2944	48	2	23.2944	23	1	23.2944	29	3
23.3067	56	2	23.3067	52	2	23.3067	36	5	23.3067	38	2	23.3067	40	2	23.3067	37	0	23.3067	28	2	23.3067	41	1	23.3067	48	2	23.3067	57	3	23.3067	21	2	23.3067	30	4
23.3189	48	1	23.3189	45	3	23.3189	30	3	23.3189	23	6	23.3189	41	2	23.3189	39	0	23.3189	33	1	23.3189	38	6	23.3189	46	2	23.3189	61	1	23.3189	22	1	23.3189	26	1
23.3311	57	2	23.3311	48	0	23.3311	30	4	23.3311	31	1	23.3311	37	0	23.3311	31	1	23.3311	45	2	23.3311	40	5	23.3311	51	1	23.3311	37	1	23.3311	27	0	23.3311	28	1
23.3433	43	1	23.3433	52	1	23.3433	40	1	23.3433	25	2	23.3433	46	1	23.3433	30	3	23.3433	38	6	23.3433	46	2	23.3433	34	3	23.3433	51	2	23.3433	30	4	23.3433	25	0
23.3555	50	3	23.3555	38	5	23.3555	41	2	23.3555	30	0	23.3555	47	3	23.3555	32	1	23.3555	45	2	23.3555	49	5	23.3555	39	3	23.3555	35	2	23.3555	23	2	23.3555	28	0
23.3677	50	1	23.3677	51	1	23.3677	50	0	23.3677	37	0	23.3677	50	2	23.3677	54	0	23.3677	35	1	23.3677	49	2	23.3677	57	3	23.3677	34	1	23.3677	34	0	23.3677	28	5
23.38	49	1	23.38	50	4	23.38	32	2	23.38	38	3	23.38	42	0	23.38	30	1	23.38	41	1	23.38	40	1	23.38	36	0	23.38	37	2	23.38	14	2	23.38	24	2
23.3922	55	2	23.3922	44	2	23.3922	33	6	23.3922	43	1	23.3922	47	0	23.3922	38	0	23.3922	47	9	23.3922	42	3	23.3922	45	2	23.3922	63	2	23.3922	29	2	23.3922	29	2
23.4044	54	3	23.4044	41	1	23.4044	39	4	23.4044	34	1	23.4044	34	4	23.4044	30	3	23.4044	41	6	23.4044	32	1	23.4044	60	1	23.4044	59	2	23.4044	26	1	23.4044	25	3
23.4166	58	2	23.4166	45	0	23.4166	23	2	23.4166	28	1	23.4166	60	1	23.4166	35	4	23.4166	42	4	23.4166	39	2	23.4166	41	0	23.4166	43	1	23.4166	29	2	23.4166	20	5
23.4288	36	2	23.4288	46	4	23.4288	41	1	23.4288	28	2	23.4288	44	4	23.4288	35	3	23.4288	50	4	23.4288	32	4	23.4288	45	0	23.4288	50	2	23.4288	35	2	23.4288	32	3
23.441	44	4	23.441	47	2	23.441	33	2	23.441	23	3	23.441	51	2	23.441	32	1	23.441	58	1	23.441	44	3	23.441	43	3	23.441	41	0	23.441	29	1	23.441	22	0
23.4532	49	0	23.4532	47	2	23.4532	30	3	23.4532	43	4	23.4532	37	5	23.4532	42	0	23.4532	33	0	23.4532	49	1	23.4532	34	2	23.4532	52	3	23.4532	27	1	23.4532	30	2
23.4655	38	3	23.4655	38	2	23.4655	23	3	23.4655	22	4	23.4655	41	2	23.4655	45	4	23.4655	34	1	23.4655	51	0	23.4655	33	1	23.4655	51	3	23.4655	29	1	23.4655	18	2
23.4777	57	3	23.4777	46	3	23.4777	34	3	23.4777	33	7	23.4777	39	0	23.4777	35	5	23.4777	42	4	23.4777	44	2	23.4777	48	1	23.4777	40	1	23.4777	33	3	23.4777	21	1
23.4899	38	3	23.4899	51	3	23.4899	47	1	23.4899	35	1	23.4899	25	1	23.4899	39	0	23.4899	35	4	23.4899	30	2	23.4899	59	4	23.4899	34	3	23.4899	32	1	23.4899	23	3
23.5021	32	3	23.5021	33	3	23.5021	24	0	23.5021	35	4	23.5021	38	0	23.5021	49	1	23.5021	40	1	23.5021	42	1	23.5021	44	3	23.5021	39	1	23.5021	29	2	23.5021	25	1
23.5143	48	4	23.5143	49	2	23.5143	42	0	23.5143	33	2	23.5143	31	2	23.5143	37	0	23.5143	46	3	23.5143	41	2	23.5143	34	3	23.5143	52	0	23.5143	38	1	23.5143	25	4
23.5265	46	3	23.5265	50	1	23.5265	28	2	23.5265	27	1	23.5265	51	1	23.5265	41	2	23.5265	33	2	23.5265	32	2	23.5265	42	0	23.5265	51	1	23.5265	30	7	23.5265	17	1
23.5387	38	1	23.5387	63	5	23.5387	32	1	23.5387	34	2	23.5387	39	4	23.5387	34	1	23.5387	35	1	23.5387	35	2	23.5387	45	0	23.5387	33	1	23.5387	24	0	23.5387	30	4
23.551	39	1	23.551	41	3	23.551	27	3	23.551	25	2	23.551	46	2	23.551	45	1	23.551	44	3	23.551	43	4	23.551	39	1	23.551	35	2	23.551	32	2	23.551	25	4
23.5632	51	4	23.5632	37	2	23.5632	35	3	23.5632	39	5	23.5632	40	2	23.5632	42	2	23.5632	34	2	23.5632	37	2	23.5632	36	7	23.5632	44	4	23.5632	32	0	23.5632	30	2
23.5754	53	3	23.5754	49	1	23.5754	30	0	23.5754	27	3	23.5754	40	1	23.5754	42	1	23.5754	42	5	23.5754	38	3	23.5754	52	4	23.5754	31	2	23.5754	18	2	23.5754	27	3
23.5876	52	5	23.5876	49	5	23.5876	29	2	23.5876	26	1	23.5876	38	4	23.5876	25	4	23.5876	53	4	23.5876	45	4	23.5876	59	1	23.5876	46	1	23.5876	23	1	23.5876	26	5
23.5998	51	0	23.5998	42	5	23.5998	30	3	23.5998	28	2	23.5998	30	2	23.5998	32	1	23.5998	25	1	23.5998	36	2	23.5998	45	3	23.5998	37	1	23.5998	28	2	23.5998	29	1
23.612	51	4	23.612	44	9	23.612	29	2	23.612	33	3	23.612	46	1	23.612	31	3	23.612	40	3	23.612	43	3	23.612	45	4	23.612	36	0	23.612	29	2	23.612	23	4
23.6242	44	2	23.6242	45	2	23.6242	25	1	23.6242	20	3	23.6242	30	0	23.6242	41	4	23.6242	29	7	23.6242	34	1	23.6242	41	0	23.6242	34	2	23.6242	30	1	23.6242	25	3
23.6365	42	1	23.6365	49	2	23.6365	27	1	23.6365	30	1	23.6365	30	1	23.6365	42	2	23.6365	30	3	23.6365	40	2	23.6365	43	3	23.6365	51	1	23.6365	26	2	23.6365	23	2
23.6487	41	0	23.6487	40	1	23.6487	20	2	23.6487	27	0	23.6487	43	1	23.6487	42	2	23.6487	26	3	23.6487	41	1	23.6487	58	0	23.6487	46	2	23.6487	21	3	23.6487	20	2
23.6609	37	2	23.6609	34	1	23.6609	32	4	23.6609	38	6	23.6609	42	0	23.6609	40	4	23.6609	37	5	23.6609	38	2	23.6609	53	1	23.6609	45	1	23.6609	18	1	23.6609	20	3
23.6731	50	2	23.6731	55	1	23.6731	28	2	23.6731	33	2	23.6731	36	3	23.6731	41	1	23.6731	33	3	23.6731	28	0	23.6731	45	4	23.6731	30	1	23.6731	18	4	23.6731	19	4
23.6853	31	2	23.6853	44	3	23.6853	26	2	23.6853	31	1	23.6853	43	2	23.6853	33	4	23.6853	43	3	23.6853	37	5	23.6853	47	0	23.6853	41	2	23.6853	22	2	23.6853	24	1
23.6975	48	1	23.6975	54	2	23.6975	33	2	23.6975	33	1	23.6975	56	1	23.6975	33	2	23.6975	35	5	23.6975	32	2	23.6975	42	2	23.6975	37	0	23.6975	27	2	23.6975	24	0
23.7098	49	2	23.7098	52	4	23.7098	31	4	23.7098	37	3	23.7098	43	2	23.7098	35	1	23.7098	36	2	23.7098	37	4	23.7098	34	1	23.7098	54	3	23.7098	22	1	23.7098	21	1
23.722	41	2	23.722	44	3	23.722	29	2	23.722	37	2	23.722	34	2	23.722	36	1	23.722	30	3	23.722	37	1	23.722	30	1	23.722	38	0	23.722	31	3	23.722	27	2
23.7342	43	2	23.7342	47	2	23.7342	18	3	23.7342	33	4	23.7342	33	3	23.7342	32	1	23.7342	43	2	23.7342	32	3	23.7342	42	1	23.7342	42	1	23.7342	20	2	23.7342	17	1
23.7464	47	1	23.7464	48	3	23.7464	23	3	23.7464	39	3	23.7464	43	3	23.7464	30	1	23.7464	36	3	23.7464	30	1	23.7464	36	3	23.7464	38	1	23.7464	27	1	23.7464	22	4
23.7586	53	2	23.7586	40	2	23.7586	29	1	23.7586	24	2	23.7586	40	0	23.7586	35	2	23.7586	41	3	23.7586	36	1	23.7586	43	2	23.7586	44	2	23.7586	23	1	23.7586	31	3
23.7708	41	4	23.7708	35	1	23.7708	35	2	23.7708	29	3	23.7708	40	2	23.7708	33	2	23.7708	31	6	23.7708	37	0	23.7708	42	2	23.7708	44	1	23.7708	13	4	23.7708	21	3
23.783	37	2	23.783	40	3	23.783	26	3	23.783	23	2	23.783	37	4	23.783	33	1	23.783	33	3	23.783	35	1	23.783	35	3	23.783	38	5	23.783	17	3	23.783	32	1
23.7953	42	0	23.7953	53	1	23.7953	42	2	23.7953	31	2	23.7953	50	3	23.7953	39	2	23.7953	34	4	23.7953	32	1	23.7953	45	3	23.7953	54	0	23.7953	24	1	23.7953	22	4
23.8075	50	2	23.8075	37	0	23.8075	37	2	23.8075	31	1	23.8075	43	1	23.8075	46	1	23.8075	33	3	23.8075	32	2	23.8075	36	0	23.8075	35	2	23.8075	15	2	23.8075	28	2
23.8197	40	1	23.8197	31	4	23.8197	24	2	23.8197	31	3	23.8197	41	1	23.8197	33	2	23.8197	33	3	23.8197	34	2	23.8197	39	3	23.8197	45	2	23.8197	23	2	23.8197	24	2
23.8319	40	4	23.8319	41	0	23.8319	26	4	23.8319	13	2	23.8319	33	0	23.8319	31	5	23.8319	34	1	23.8319	39	3	23.8319	38	4	23.8319	44	5	23.8319	21	4	23.8319	16	0
23.8441	53	1	23.8441	44	2	23.8441	31	1	23.8441	37	2	23.8441	44	1	23.8441	41	4	23.8441	39	2	23.8441	38	2	23.8441	35	2	23.8441	47	1	23.8441	29	3	23.8441	17	2
23.8563	44	3	23.8563	34	1	23.8563	16	1	23.8563	36	0	23.8563	42	1	23.8563	38	1	23.8563	38	2	23.8563	30	1	23.8563	41	4	23.8563	30	0	23.8563	24	1	23.8563	23	2
23.8686	37	1	23.8686	37	3	23.8686	30	2	23.8686	18	3	23.8686	43	1	23.8686	44	0	23.8686	28	4	23.8686	43	3	23.8686	43	5	23.8686	33	3	23.8686	23	4	23.8686	19	0
23.8808	35	1	23.8808	48	4	23.8808	30	3	23.8808	38	3	23.8808	33	4	23.8808	37	3	23.8808	47	2	23.8808	34	3	23.8808	43	2	23.8808	45	2	23.8808	30	1	23.8808	22	3
23.893	30	3	23.893	38	2	23.893	28	2	23.893	22	2	23.893	40	3	23.893	43	0	23.893	42	3	23.893	52	4	23.893	37	0	23.893	35	3	23.893	28	2	23.893	18	0
23.9052	47	2	23.9052	47	3	23.9052	22	3	23.9052	26	2	23.9052	42	1	23.9052	31	3	23.9052	42	1	23.9052	33	1	23.9052	35	3	23.9052	45	8	23.9052	23	3	23.9052	23	3
23.9174	33	1	23.9174	48	0	23.9174	30	0	23.9174	27	2	23.9174	37	0	23.9174	38	2	23.9174	34	1	23.9174	27	3	23.9174	51	1	23.9174	35	1	23.9174	17	0	23.9174	32	4
23.9296	46	3	23.9296	40	0	23.9296	32	5	23.9296	34	2	23.9296	50	1	23.9296	36	1	23.9296	29	2	23.9296	41	1	23.9296	48	3	23.9296	40	4	23.9296	14	0	23.9296	26	2
23.9418	49	3	23.9418	32	2	23.9418	30	2	23.9418	30	2	23.9418	32	2	23.9418	30	2	23.9418	38	3	23.9418	39	3	23.9418	27	1	23.9418	38	1	23.9418	28	3	23.9418	22	1
23.9541	40	2	23.9541	33	3	23.9541	27	1	23.9541	31	3	23.9541	39	2	23.9541	35	0	23.9541	31	5	23.9541	40	0	23.9541	35	2	23.9541	41	1	23.9541	28	1	23.9541	21	2
23.9663	40	0	23.9663	45	2	23.9663	36	3	23.9663	29	1	23.9663	39	1	23.9663	30	2	23.9663	31	4	23.9663	30	1	23.9663	27	1	23.9663	34	2	23.9663	18	1	23.9663	14	3
23.9785	39	1	23.9785	46	2	23.9785	27	2	23.9785	27	2	23.9785	50	0	23.9785	39	1	23.9785	25	3	23.9785	40	1	23.9785	36	3	23.9785	47	0	23.9785	23	2	23.9785	19	1
23.9907	39	1	23.9907	42	3	23.9907	31	4	23.9907	27	0	23.9907	47	1	23.9907	40	1	23.9907	41	3	23.9907	37	2	23.9907	48	1	23.9907	34	6	23.9907	19	4	23.9907	14	3
24.0029	43	1	24.0029	34	2	24.0029	19	2	24.0029	21	3	24.0029	31	2	24.0029	46	1	24.0029	23	1	24.0029	31	1	24.0029	38	1	24.0029	51	5	24.0029	22	1	24.0029	21	3
24.0151	40	1	24.0151	43	1	24.0151	33	0	24.0151	22	2	24.0151	34	1	24.0151	38	2	24.0151	32	2	24.0151	46	0	24.0151	46	5	24.0151	44	1	24.0151	16	2	24.0151	25	2
24.0273	43	1	24.0273	40	1	24.0273	21	2	24.0273	39	0	24.0273	36	1	24.0273	36	2	24.0273	35	1	24.0273	25	5	24.0273	37	2	24.0273	32	2	24.0273	13	5	24.0273	22	1
24.0396	31	3	24.0396	39	4	24.0396	24	4	24.0396	27	0	24.0396	28	2	24.0396	37	2	24.0396	30	1	24.0396	34	0	24.0396	26	1	24.0396	26	2	24.0396	24	3	24.0396	34	4
24.0518	36	6	24.0518	37	4	24.0518	29	1	24.0518	38	3	24.0518	43	1	24.0518	34	0	24.0518	39	1	24.0518	37	0	24.0518	45	1	24.0518	38	0	24.0518	34	4	24.0518	22	1
24.064	33	2	24.064	44	2	24.064	23	0	24.064	24	1	24.064	40	1	24.064	35	2	24.064	25	5	24.064	37	1	24.064	41	2	24.064	41	0	24.064	22	2	24.064	19	1
24.0762	41	1	24.0762	36	3	24.0762	37	2	24.0762	20	2	24.0762	40	4	24.0762	48	1	24.0762	28	4	24.0762	36	5	24.0762	46	1	24.0762	28	2	24.0762	22	1	24.0762	23	0
24.0884	44	1	24.0884	34	3	24.0884	19	2	24.0884	23	7	24.0884	34	2	24.0884	35	2	24.0884	30	5	24.0884	35	1	24.0884	42	2	24.0884	36	2	24.0884	22	3	24.0884	21	0
24.1006	49	4	24.1006	38	2	24.1006	31	2	24.1006	29	2	24.1006	37	4	24.1006	34	3	24.1006	31	4	24.1006	35	2	24.1006	48	0	24.1006	39	3	24.1006	26	1	24.1006	19	3
24.1129	43	2	24.1129	42	1	24.1129	36	2	24.1129	19	1	24.1129	34	6	24.1129	48	4	24.1129	33	1	24.1129	39	0	24.1129	36	1	24.1129	42	2	24.1129	28	6	24.1129	20	4
24.1251	33	1	24.1251	36	1	24.1251	30	2	24.1251	35	0	24.1251	34	1	24.1251	30	2	24.1251	27	5	24.1251	32	2	24.1251	40	5	24.1251	42	1	24.1251	19	2	24.1251	16	0
24.1373	41	2	24.1373	41	0	24.1373	38	3	24.1373	35	2	24.1373	51	0	24.1373	43	2	24.1373	53	1	24.1373	34	2	24.1373	34	0	24.1373	45	3	24.1373	17	2	24.1373	21	1
24.1495	56	3	24.1495	41	2	24.1495	21	1	24.1495	23	2	24.1495	37	3	24.1495	39	0	24.1495	33	2	24.1495	34	0	24.1495	37	2	24.1495	42	5	24.1495	20	2	24.1495	22	2
24.1617	37	1	24.1617	40	2	24.1617	28	0	24.1617	21	3	24.1617	30	1	24.1617	36	1	24.1617	41	2	24.1617	48	2	24.1617	38	0	24.1617	43	5	24.1617	17	4	24.1617	26	1
24.1739	27	2	24.1739	38	4	24.1739	35	2	24.1739	21	0	24.1739	34	1	24.1739	35	2	24.1739	29	5	24.1739	34	2	24.1739	43	0	24.1739	38	2	24.1739	27	1	24.1739	22	3
24.1862	41	3	24.1862	38	4	24.1862	28	3	24.1862	29	1	24.1862	33	4	24.1862	36	2	24.1862	31	4	24.1862	29	5	24.1862	35	3	24.1862	40	0	24.1862	21	2	24.1862	31	3
24.1984	27	1	24.1984	33	0	24.1984	32	1	24.1984	26	3	24.1984	29	2	24.1984	34	2	24.1984	23	1	24.1984	37	2	24.1984	46	4	24.1984	43	2	24.1984	22	0	24.1984	17	3
24.2106	29	3	24.2106	45	5	24.2106	24	2	24.2106	32	1	24.2106	42	3	24.2106	34	1	24.2106	34	5	24.2106	34	1	24.2106	38	1	24.2106	46	3	24.2106	14	4	24.2106	17	0
24.2228	40	4	24.2228	29	3	24.2228	29	1	24.2228	24	1	24.2228	36	1	24.2228	37	2	24.2228	36	3	24.2228	26	3	24.2228	48	2	24.2228	46	1	24.2228	16	6	24.2228	14	2
24.235	41	5	24.235	49	2	24.235	26	0	24.235	29	2	24.235	30	1	24.235	33	7	24.235	30	3	24.235	37	4	24.235	41	2	24.235	31	3	24.235	21	1	24.235	19	2
24.2472	37	2	24.2472	33	4	24.2472	32	2	24.2472	28	5	24.2472	40	4	24.2472	32	1	24.2472	27	3	24.2472	30	1	24.2472	39	1	24.2472	34	1	24.2472	22	1	24.2472	18	0
24.2594	30	4	24.2594	40	1	24.2594	22	2	24.2594	29	2	24.2594	33	5	24.2594	40	3	24.2594	27	1	24.2594	33	0	24.2594	44	2	24.2594	37	3	24.2594	32	2	24.2594	20	0
24.2717	37	2	24.2717	43	3	24.2717	28	3	24.2717	23	2	24.2717	36	2	24.2717	27	2	24.2717	32	4	24.2717	32	2	24.2717	40	2	24.2717	40	0	24.2717	29	1	24.2717	20	4
24.2839	46	1	24.2839	38	1	24.2839	33	3	24.2839	23	1	24.2839	33	3	24.2839	24	4	24.2839	29	4	24.2839	37	2	24.2839	42	1	24.2839	41	1	24.2839	18	2	24.2839	18	2
24.2961	40	3	24.2961	43	1	24.2961	24	1	24.2961	19	3	24.2961	42	2	24.2961	35	0	24.2961	38	2	24.2961	37	2	24.2961	37	1	24.2961	40	3	24.2961	18	2	24.2961	18	2
24.3083	42	1	24.3083	27	0	24.3083	26	2	24.3083	35	4	24.3083	37	2	24.3083	47	1	24.3083	30	3	24.3083	33	3	24.3083	46	2	24.3083	34	2	24.3083	23	1	24.3083	24	0
24.3205	44	0	24.3205	23	1	24.3205	29	3	24.3205	26	2	24.3205	51	2	24.3205	30	0	24.3205	34	0	24.3205	39	1	24.3205	42	1	24.3205	33	2	24.3205	15	0	24.3205	14	1
24.3327	35	3	24.3327	32	3	24.3327	25	2	24.3327	19	1	24.3327	27	3	24.3327	36	2	24.3327	28	2	24.3327	34	2	24.3327	35	2	24.3327	23	0	24.3327	16	2	24.3327	21	0
24.345	36	1	24.345	31	2	24.345	34	2	24.345	29	2	24.345	28	4	24.345	31	1	24.345	27	5	24.345	33	1	24.345	30	1	24.345	41	1	24.345	19	0	24.345	22	4
24.3572	39	2	24.3572	33	4	24.3572	30	2	24.3572	28	1	24.3572	28	2	24.3572	32	3	24.3572	34	1	24.3572	39	0	24.3572	31	1	24.3572	38	1	24.3572	17	2	24.3572	25	1
24.3694	37	5	24.3694	34	3	24.3694	31	2	24.3694	24	0	24.3694	39	2	24.3694	31	4	24.3694	28	4	24.3694	37	1	24.3694	36	3	24.3694	33	2	24.3694	17	3	24.3694	21	1
24.3816	36	1	24.3816	27	2	24.3816	20	1	24.3816	29	2	24.3816	29	2	24.3816	26	1	24.3816	28	2	24.3816	46	2	24.3816	49	1	24.3816	35	1	24.3816	25	2	24.3816	17	2
24.3938	32	0	24.3938	34	3	24.3938	35	3	24.3938	29	4	24.3938	32	2	24.3938	23	2	24.3938	33	4	24.3938	23	1	24.3938	31	2	24.3938	41	2	24.3938	18	1	24.3938	19	2
[truncated: 2,098 more rows]
