# Supplementary material for: Identification of distinct pH- and zeaxanthin-dependent quenching in LHCSR3 from Chlamydomonas reinhardtii
Source: eLife journal article supplement (doi:10.7554/elife.60383), 2021-01-15
Supplement: supp [file elife-60383-supp-v1.zip › elife_poa_e60383_Figure_3_source_data_4.docx]

|  | τ1 (ns) | f1 | τ2 (ns) | f2 | τavg (ns) |
| --- | --- | --- | --- | --- | --- |
| CC4349 t0 b2 | 3.560 ± 0.014 | 0.926 ± 0.013 | 0.438 ± 0.049 | 0.074 ± 0.013 | 3.327 ± 0.058 |
| CC4349 t60 b2 | 3.505 ± 0.021 | 0.904 ± 0.006 | 0.629 ± 0.091 | 0.096 ± 0.006 | 3.230 ± 0.012 |
| zep B2 | 3.457 ± 0.021 | 0.811 ± 0.007 | 0.920 ± 0.057 | 0.189 ± 0.007 | 2.992 ± 0.045 |
| CC4349 t0 b3 | 3.410 ± 0.099 | 0.961 ± 0.000 | 0.506 ± 0.107 | 0.039 ± 0.000 | 3.296 ± 0.100 |
| CC4349 t60 b3 | 3.345 ± 0.049 | 0.963 ± 0.003 | 1.825 ± 0.049 | 0.037 ± 0.003 | 3.289 ± 0.041 |
| zep B3 | 3.280 ± 0.000 | 0.843 ± 0.012 | 1.000 ± 0.028 | 0.157 ± 0.012 | 2.921 ± 0.032 |
