# Supplementary material for: Identification of distinct pH- and zeaxanthin-dependent quenching in LHCSR3 from Chlamydomonas reinhardtii
Source: eLife journal article supplement (doi:10.7554/elife.60383), 2021-01-15
Supplement: supp [file elife-60383-supp-v1.zip › elife_poa_e60383_Figure_3_source_data_5.xlsx]

## Sheet: LL
TIME (min)	4a+	DEV.ST	npq1	DEV.ST	npq4.1	DEV.ST		TIME (min)	cc4349	DEV.ST	zep3	DEV.ST
0	0	0	0	0	0	0		0	0	0	0	0
5	0.22569	0.0708	0.49675	0.11996	0.60989	0.11523		5	0.54773	0.05899	0.18111	0.03397
10	0.44522	0.03437	0.85146	0.07105	1.18706	0.11714		10	0.92868	0.03883	0.46848	0.10006
15	0.57673	0.08597	1.19943	0.04578	1.66034	0.19725		15	1.33669	0.07952	0.70247	0.12149
20	0.6991	0.09377	1.26444	0.2312	1.90603	0.17295		20	1.48635	0.04711	0.86211	0.14772
25	0.79699	0.0665	1.50416	0.19129	2.15267	0.04968		25	1.7839	0.06889	1.07916	0.14334
30	0.82439	0.1249	1.56133	0.01518	2.28864	0.26181		30	1.92347	0.1136	1.09625	0.16231
40	0.82418	0.0909	1.65983	0.15098	2.71943	0.42082		40	2.36975	0.09785	1.31019	0.18513
50	0.91452	0.14761	1.87439	0.20736	3.20744	0.40464		50	2.57467	0.14391	1.3466	0.05581
60	1.11733	0.22056	2.17644	0.165	3.70426	0.31149		60	2.84051	0.20648	1.4748	0.15263
80	1.58641	0.27848	2.66869	0.28737	5.01167	0.50257		80	3.56755	0.12495	1.90282	0.36742
100	2.12855	0.33992	2.87094	0.1659	6.31814	0.67183		100	3.92323	0.16949	2.47214	0.43605

## Sheet: HL
TIME (min)	4a+	DEV.ST	npq1	DEV.ST	npq4.1	DEV.ST		TIME (min)	cc4349	DEV.ST	zep3	DEV.ST
0	0	0	0	0	0	0		0	0	0	0	0
5	0.0501	0.01572	0.08227	0.01987	0.139	0.02626		5	0.09468	0.0102	0.05205	0.00976
10	0.09884	0.00763	0.14102	0.01177	0.27055	0.0267		10	0.16053	0.00671	0.13463	0.02875
15	0.12803	0.01908	0.19865	0.00758	0.37841	0.04496		15	0.23106	0.01375	0.20187	0.03491
20	0.15519	0.02082	0.20942	0.03829	0.43441	0.03942		20	0.25693	0.00814	0.24774	0.04245
25	0.17693	0.01476	0.24912	0.03168	0.49062	0.01132		25	0.30837	0.01191	0.31011	0.04119
30	0.18301	0.02773	0.25859	0.00251	0.52161	0.05967		30	0.33249	0.01964	0.31503	0.04664
40	0.18296	0.02018	0.27491	0.02501	0.61979	0.09591		40	0.40964	0.01691	0.37651	0.0532
50	0.20302	0.03277	0.31044	0.03434	0.73102	0.09222		50	0.44506	0.02488	0.38697	0.01604
60	0.24804	0.04896	0.36047	0.02733	0.84425	0.07099		60	0.49101	0.03569	0.42381	0.04386
80	0.35217	0.06182	0.442	0.0476	1.14222	0.11454		80	0.61669	0.0216	0.54681	0.10559
100	0.47252	0.07546	0.47549	0.02748	1.43998	0.15312		100	0.67817	0.0293	0.71041	0.12531
