# Supplementary figures and images for: Identification of distinct pH- and zeaxanthin-dependent quenching in LHCSR3 from Chlamydomonas reinhardtii
Source: eLife journal article supplement (doi:10.7554/elife.60383), 2021-01-15

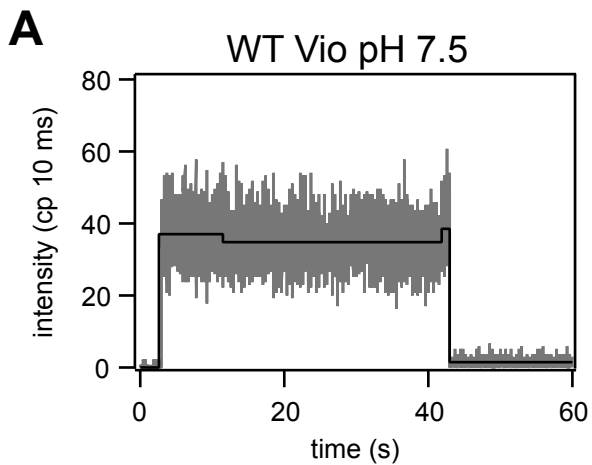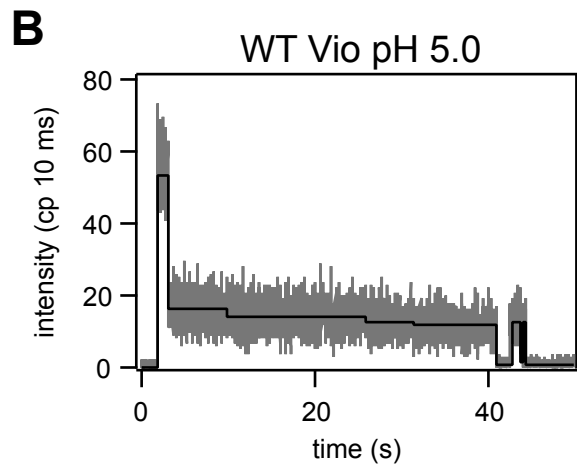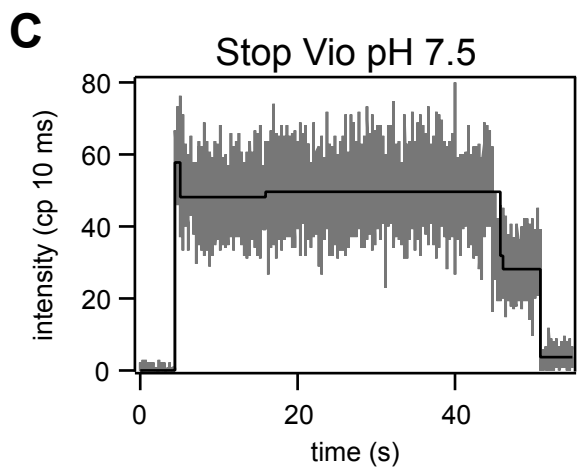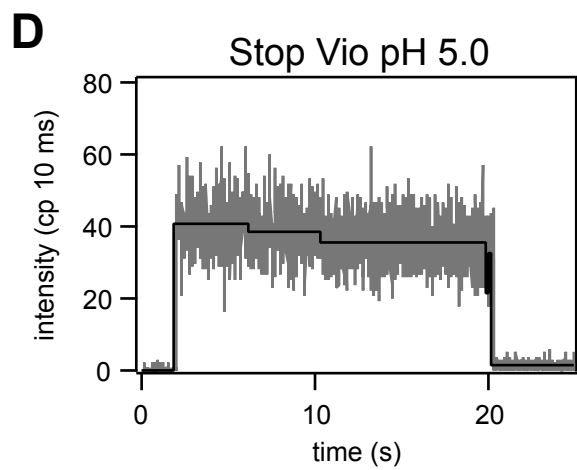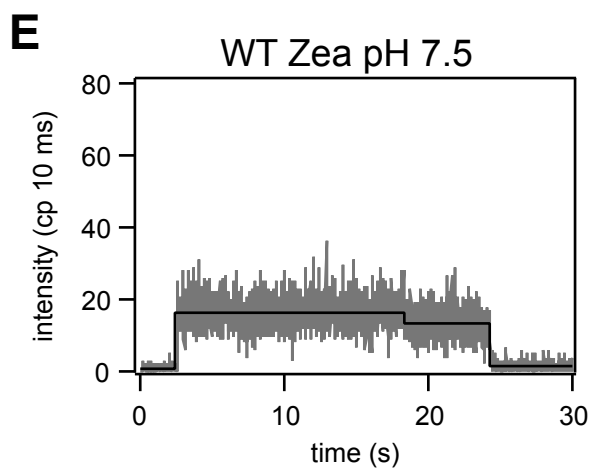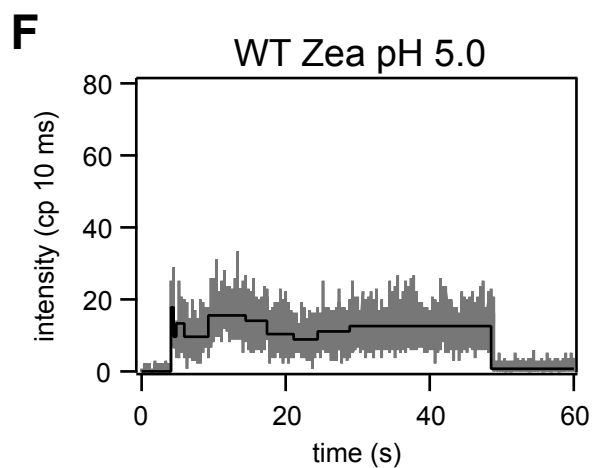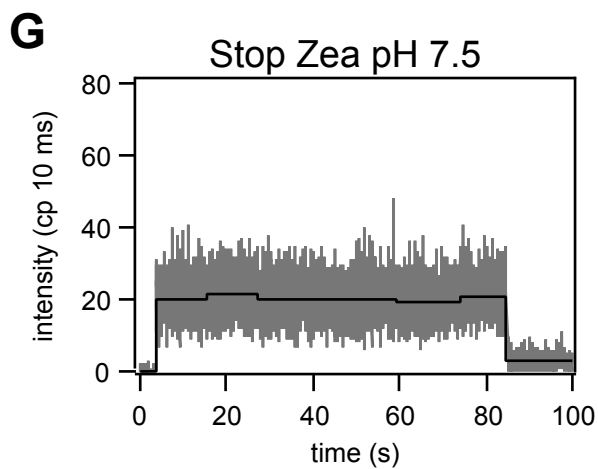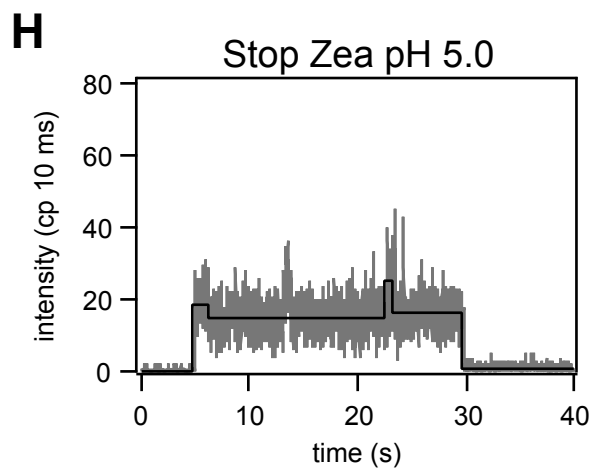

Supplement: supp [file elife-60383-supp-v1.zip]

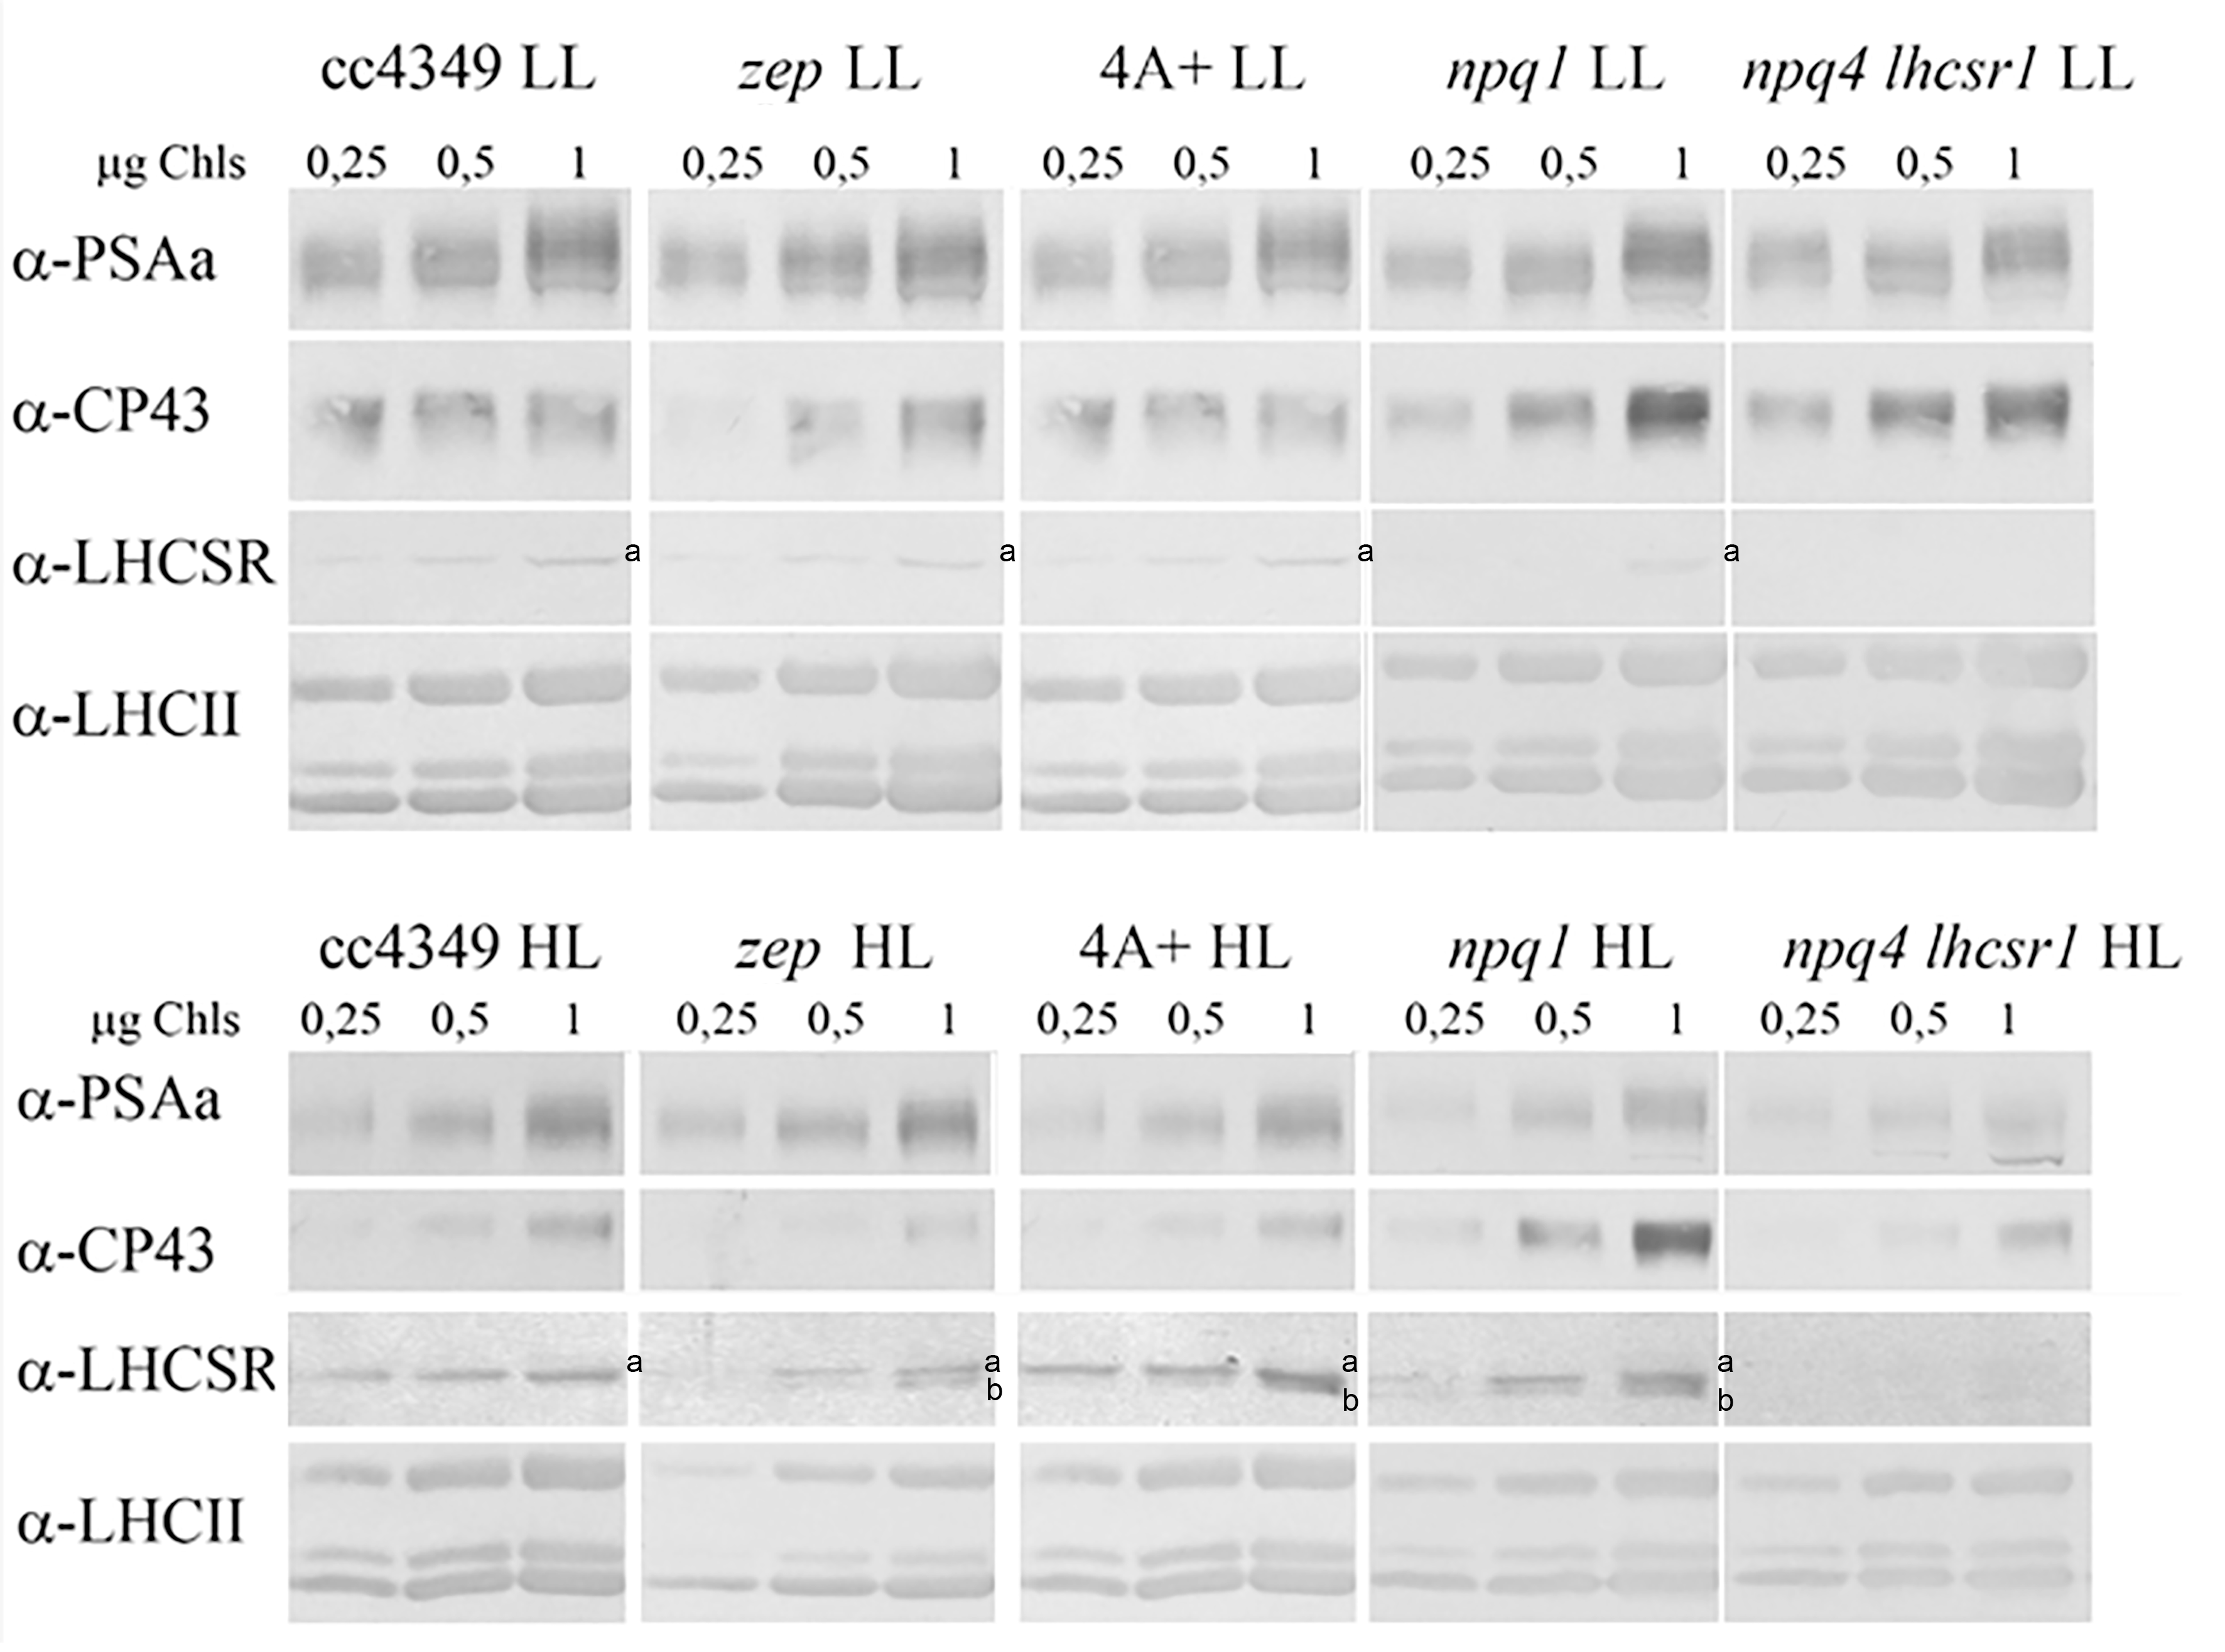

Supplement: supp [file elife-60383-supp-v1.zip › elife_poa_e60383_Figure_1_figure_supplement_1.png]

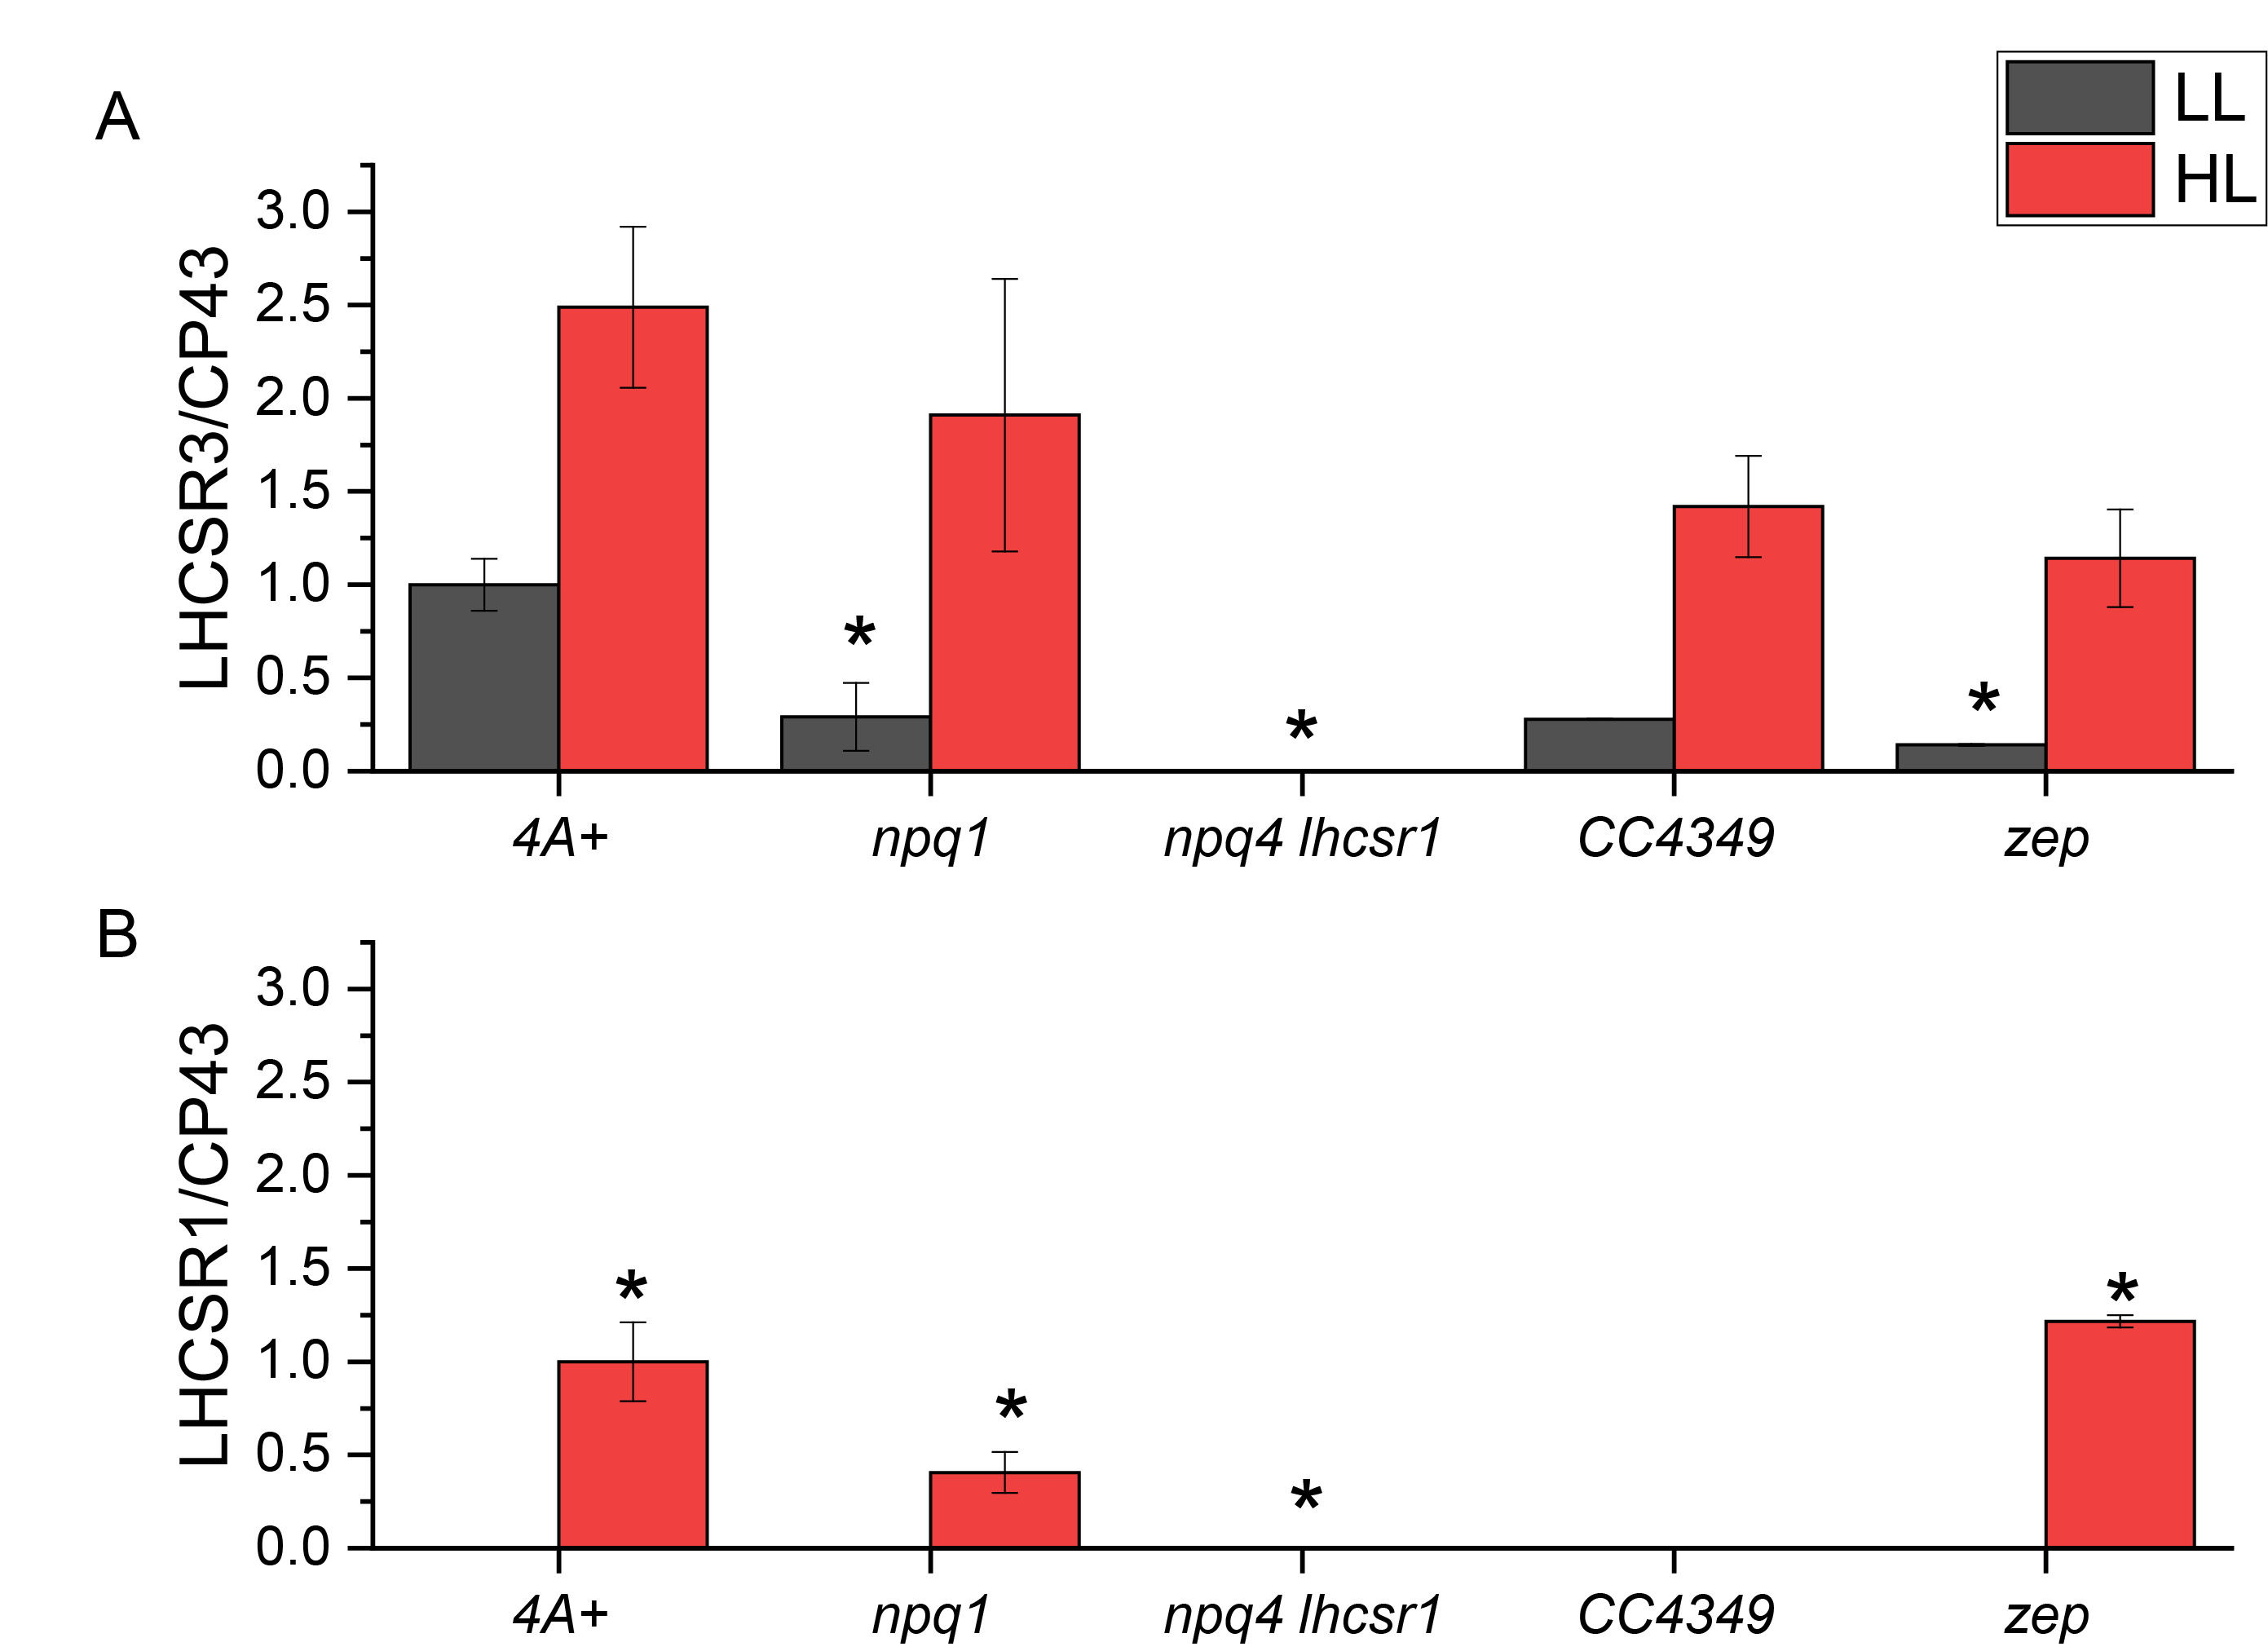

Supplement: supp [file elife-60383-supp-v1.zip › elife_poa_e60383_Figure_1_figure_supplement_2.png]

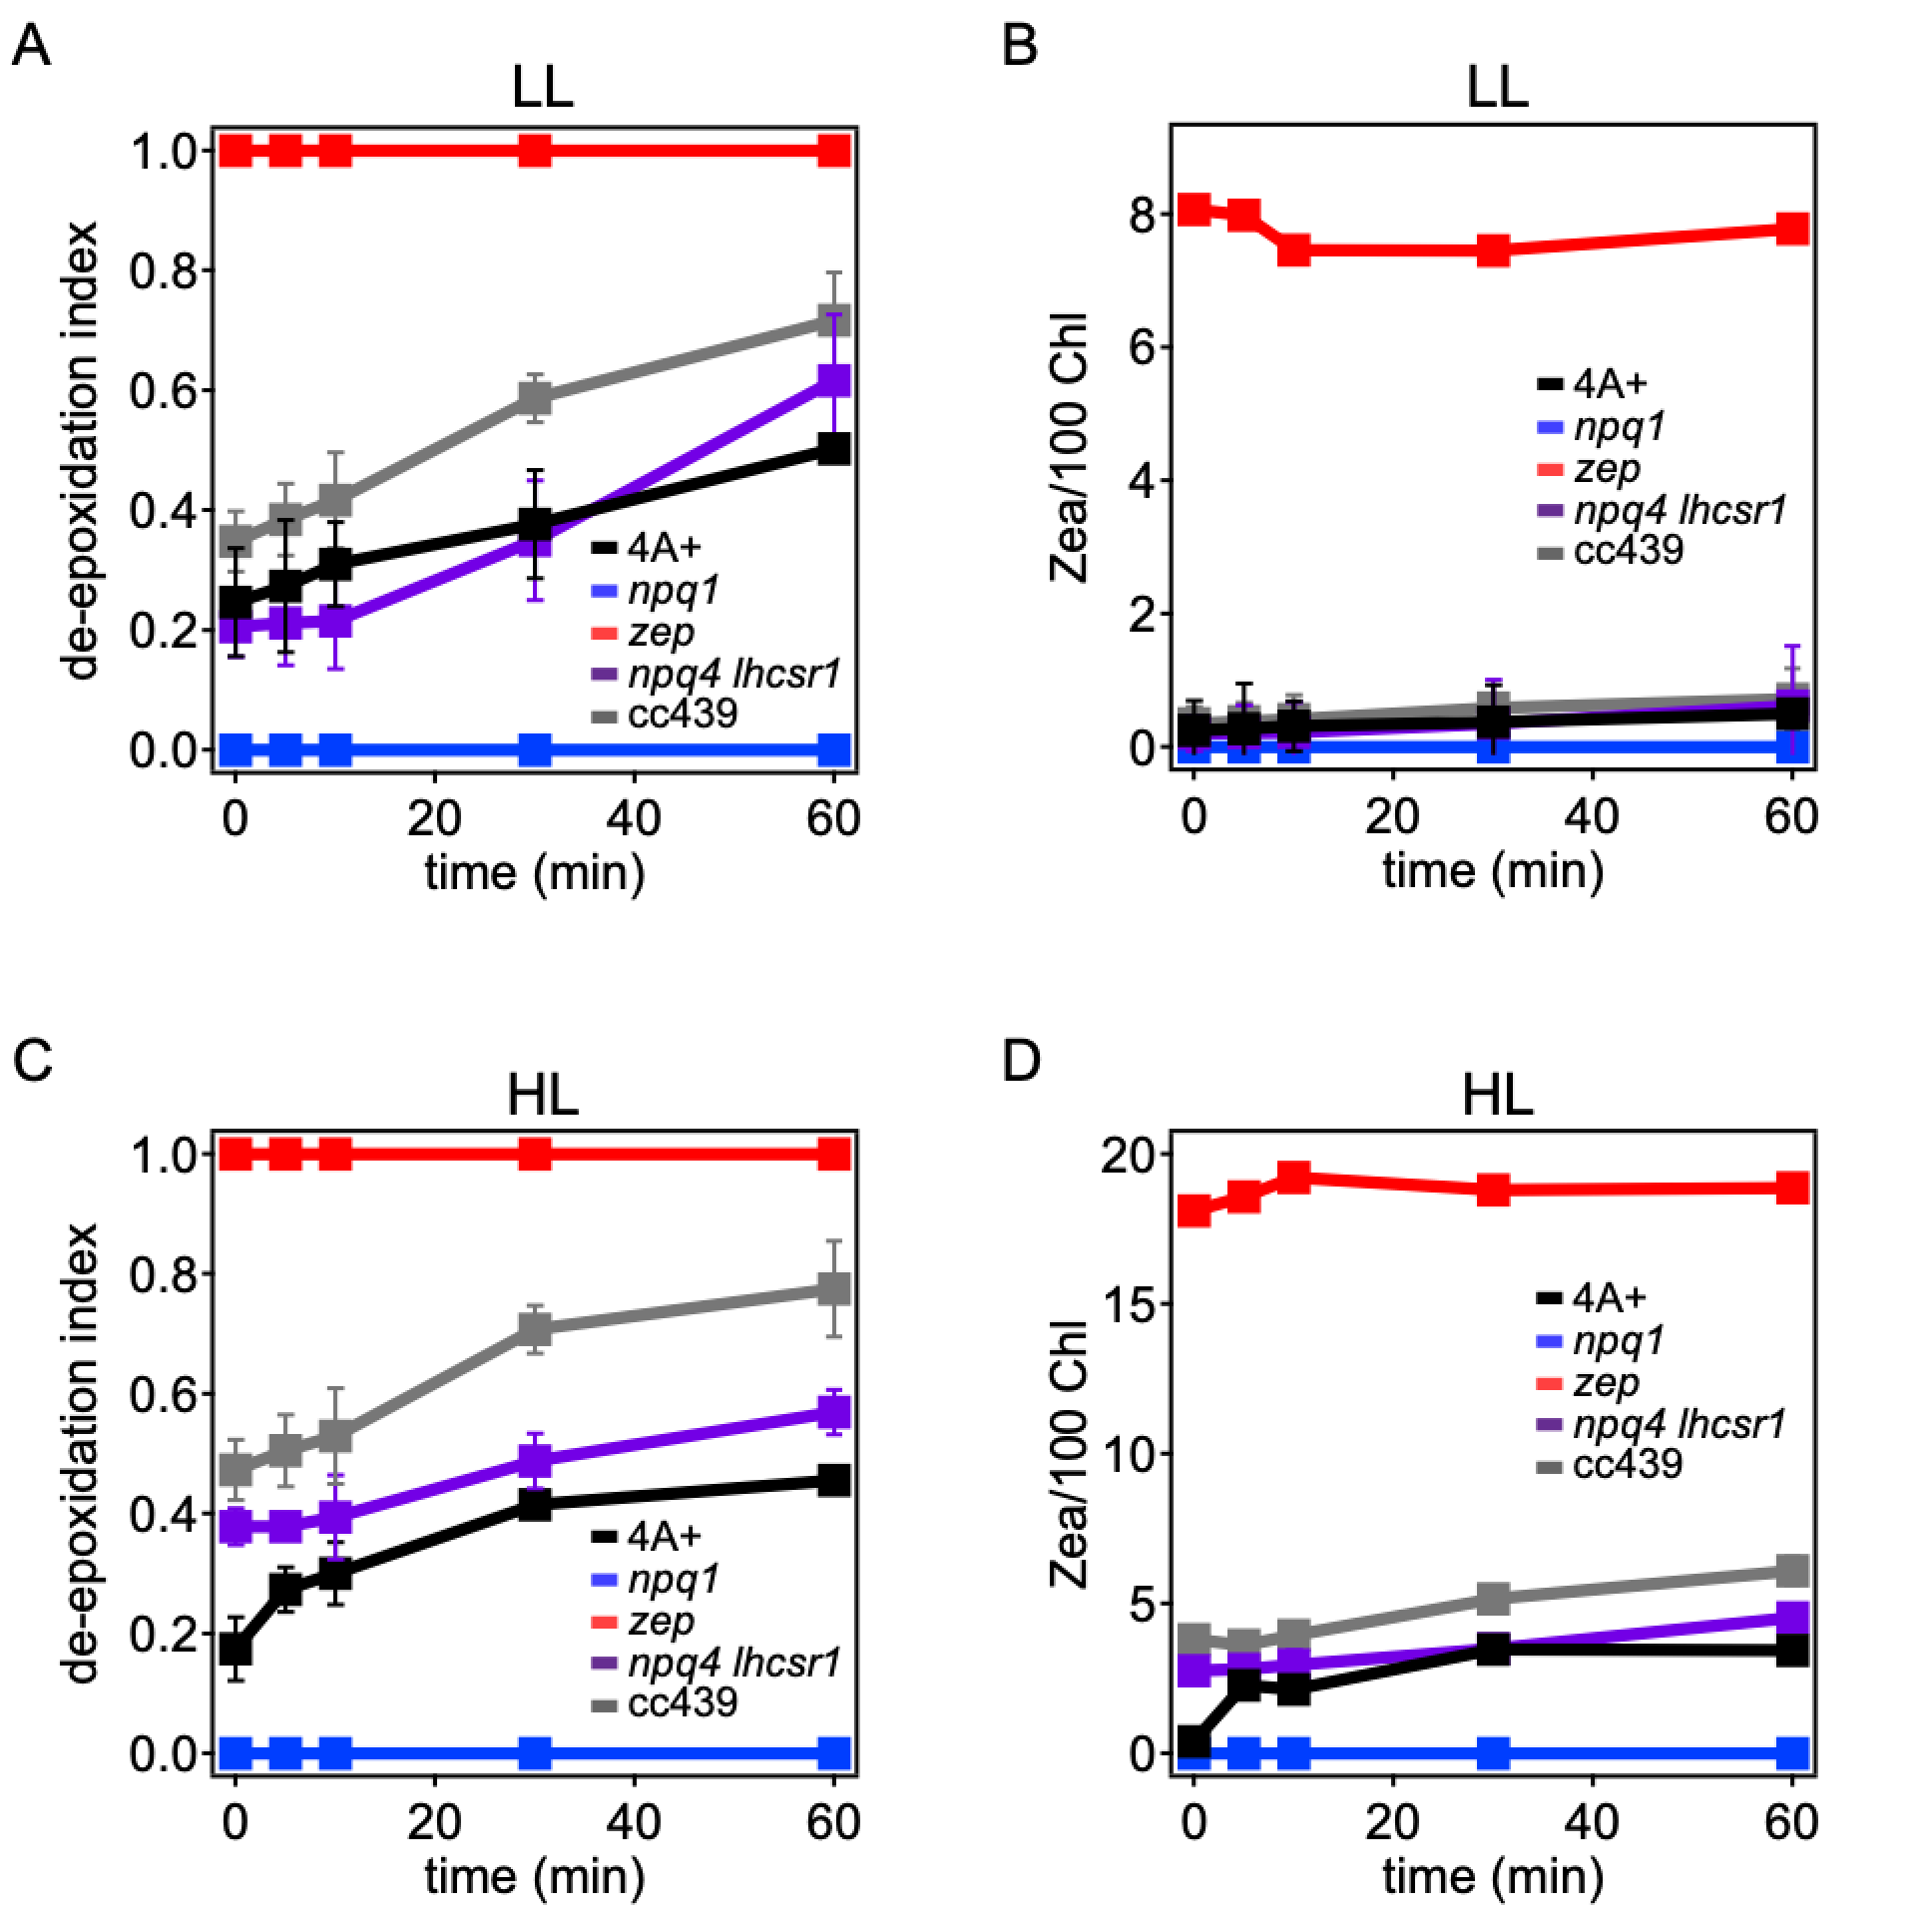

Supplement: supp [file elife-60383-supp-v1.zip › elife_poa_e60383_Figure_1_figure_supplement_3.png]

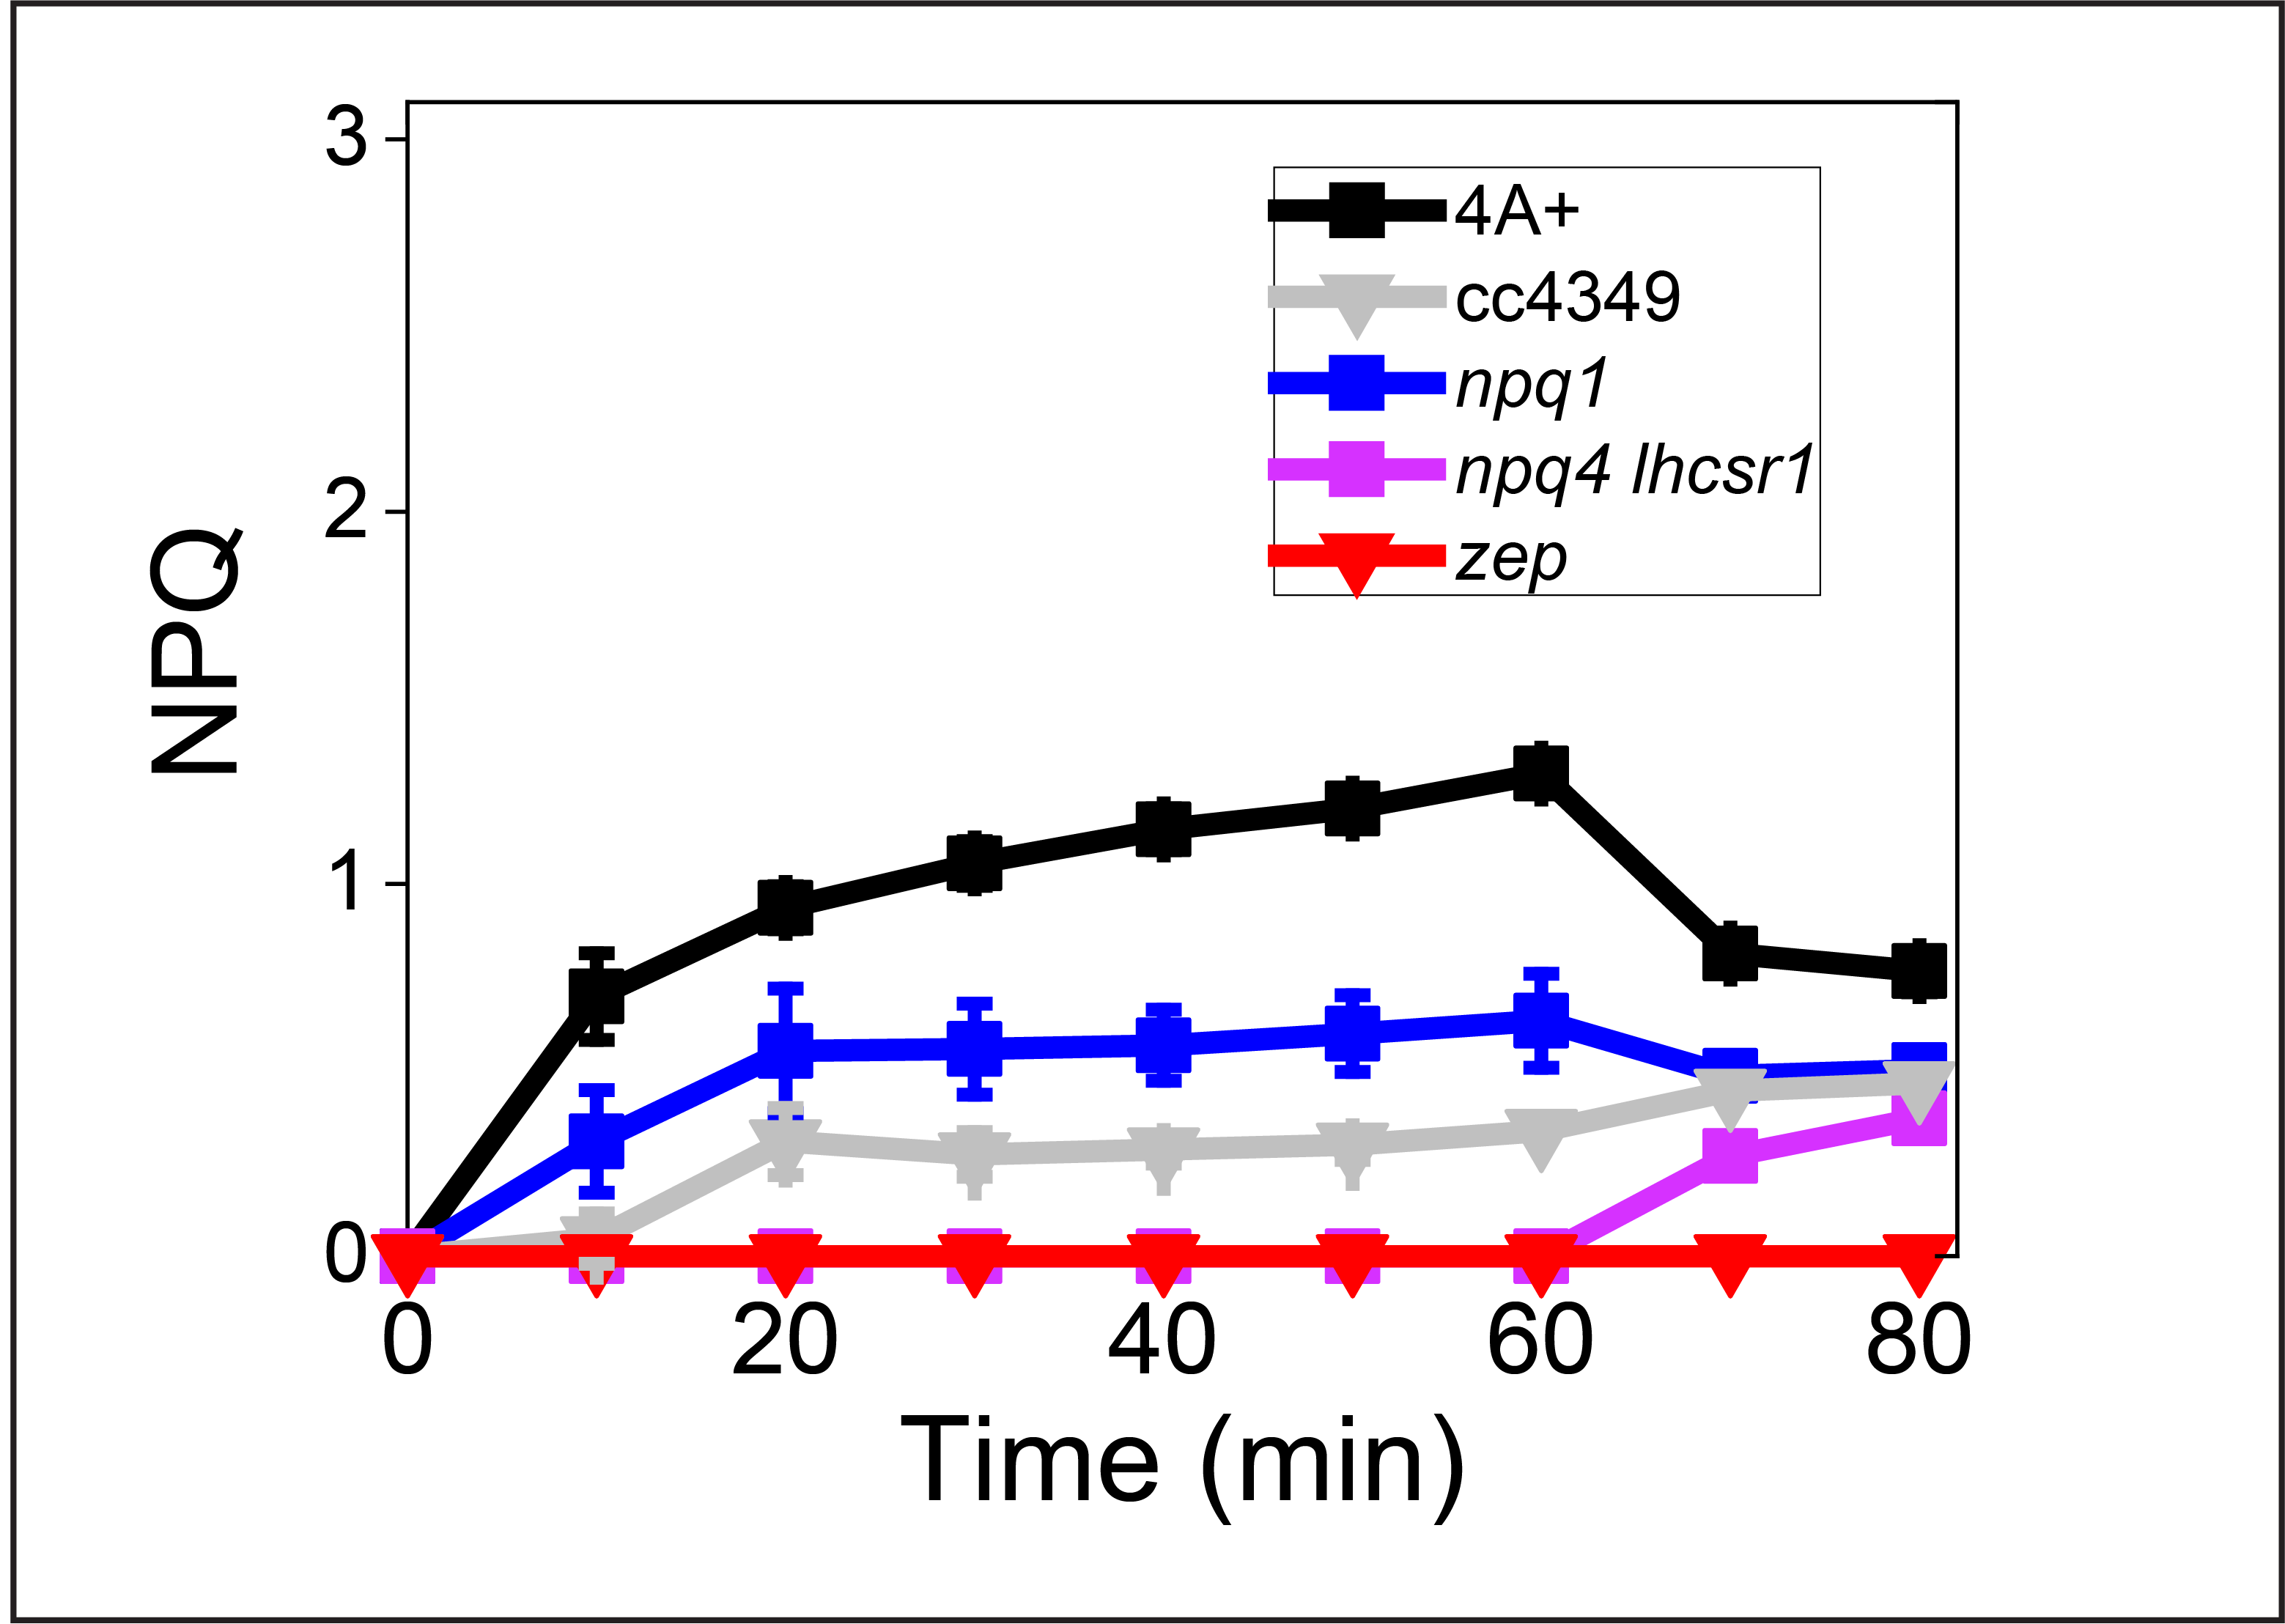

Supplement: supp [file elife-60383-supp-v1.zip › elife_poa_e60383_Figure_1_figure_supplement_4.png]

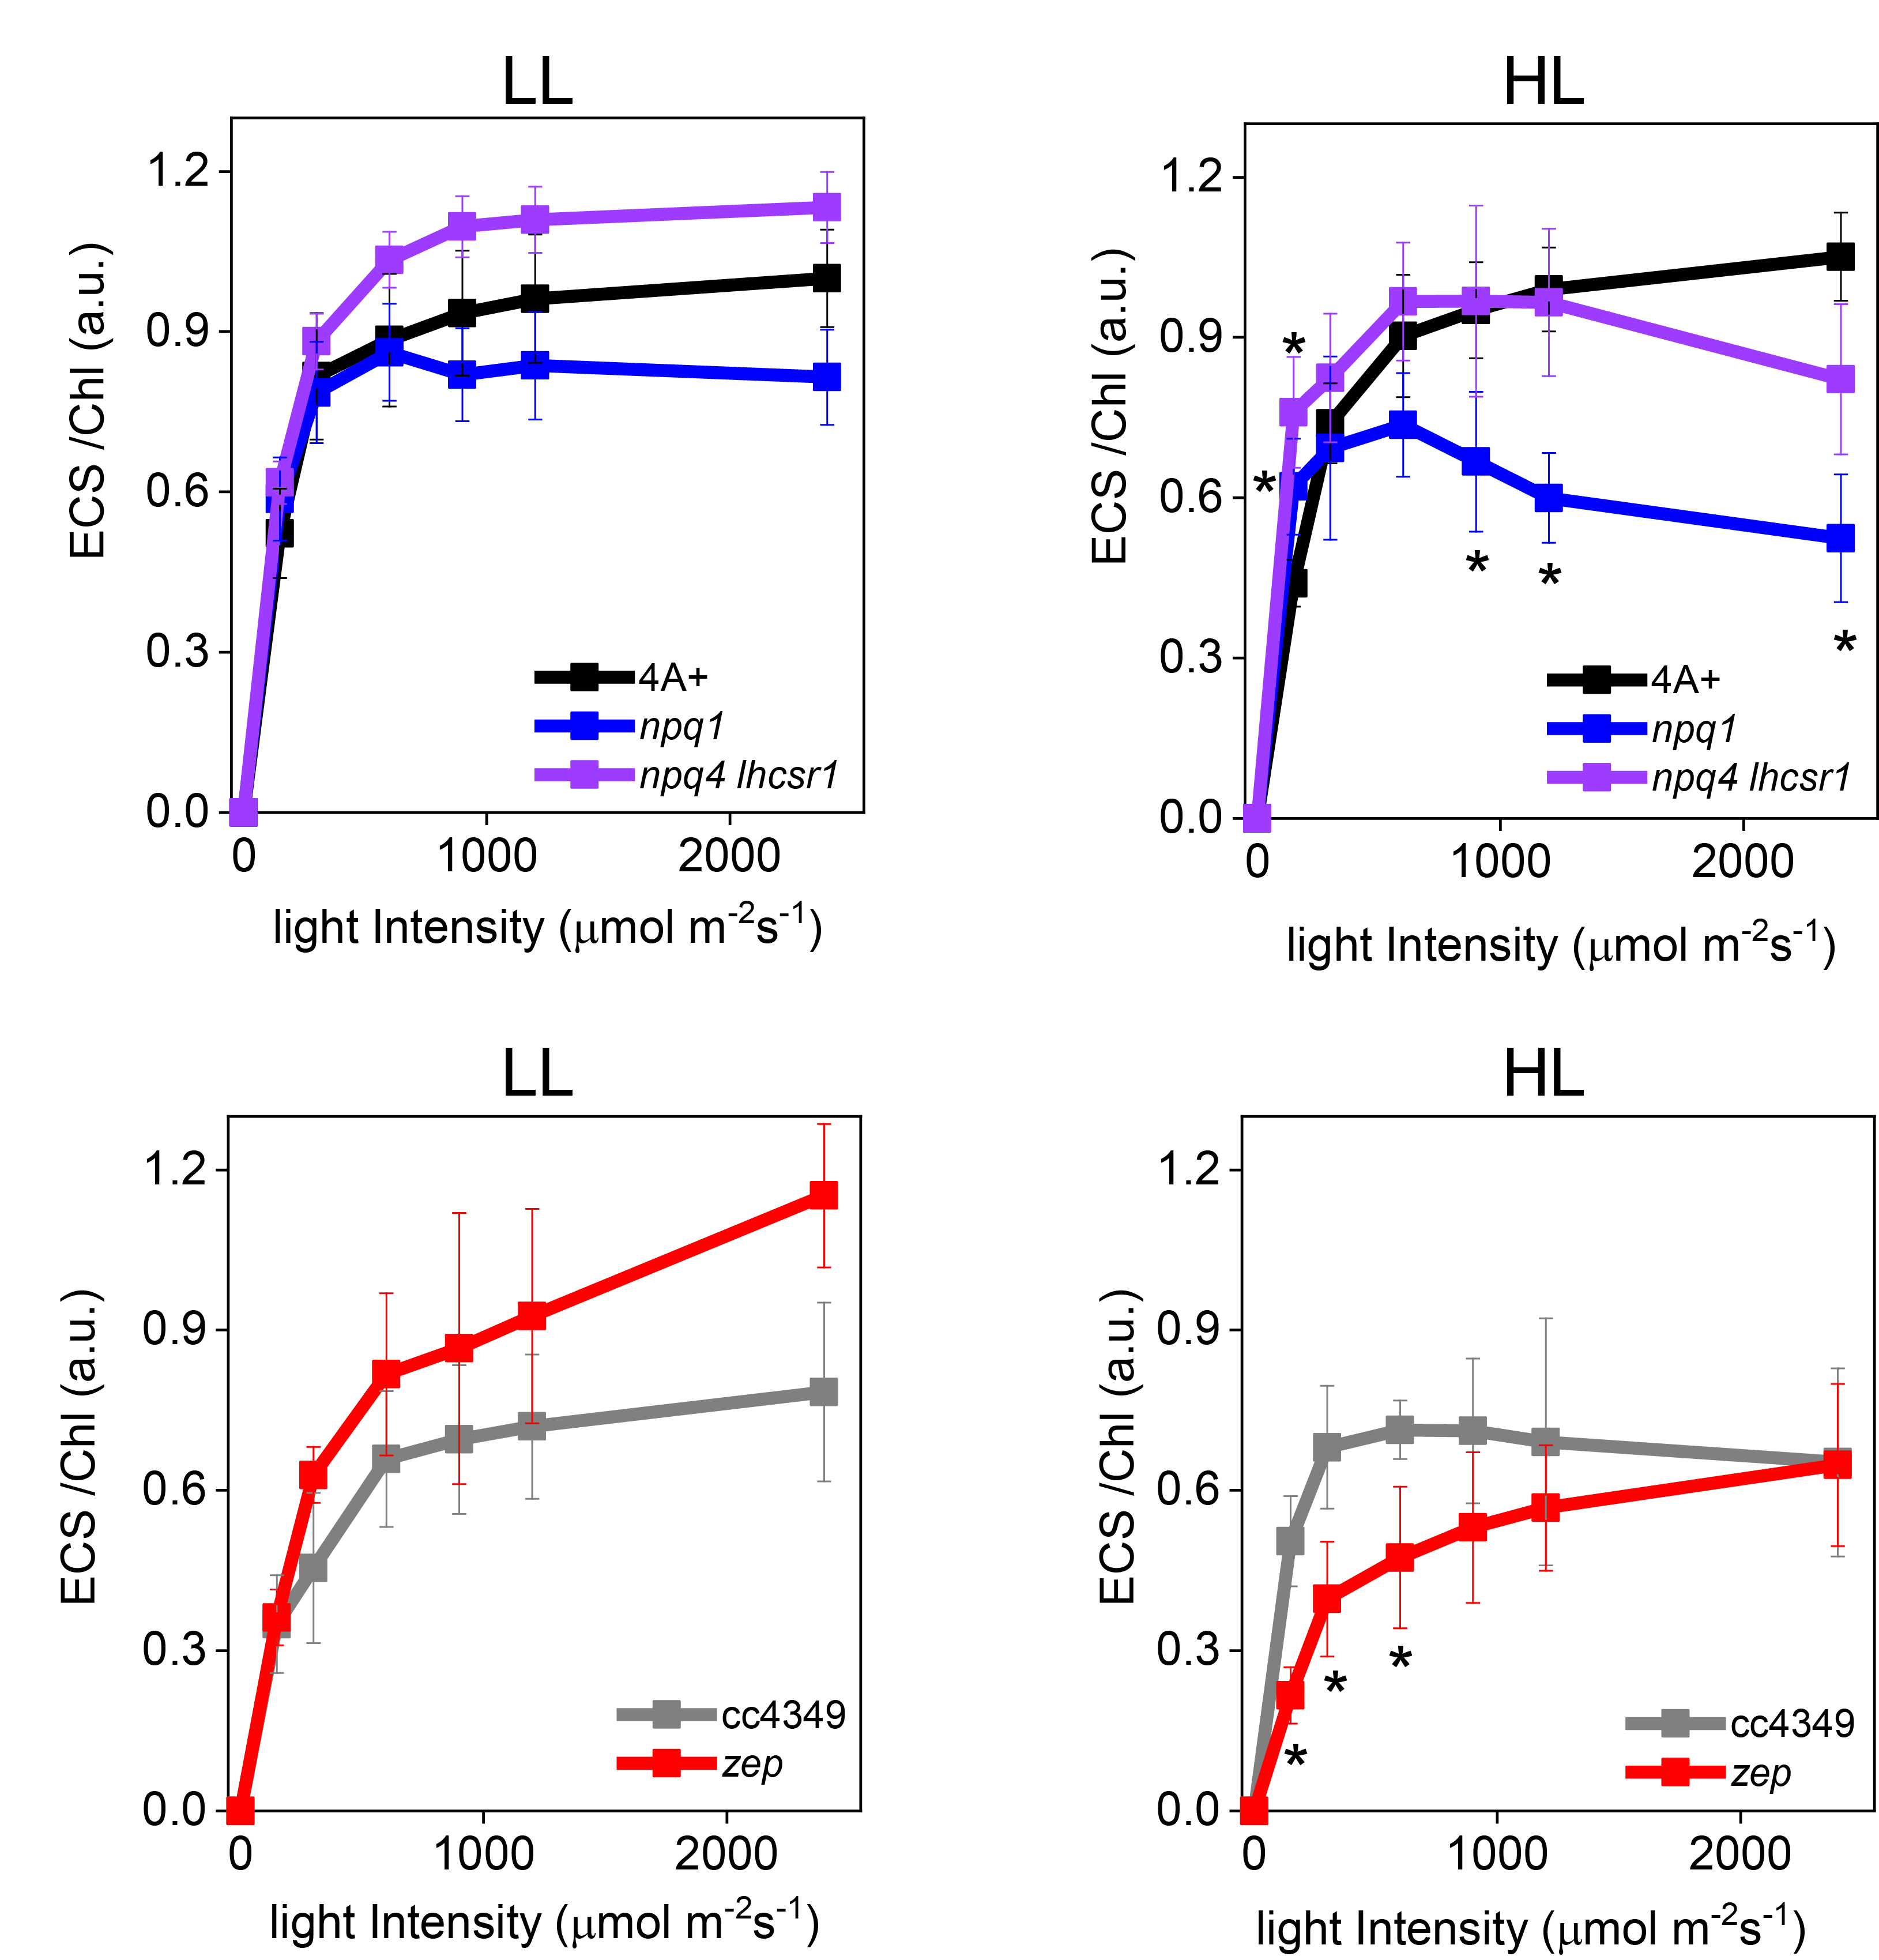

Supplement: supp [file elife-60383-supp-v1.zip › elife_poa_e60383_Figure_1_figure_supplement_6.png]

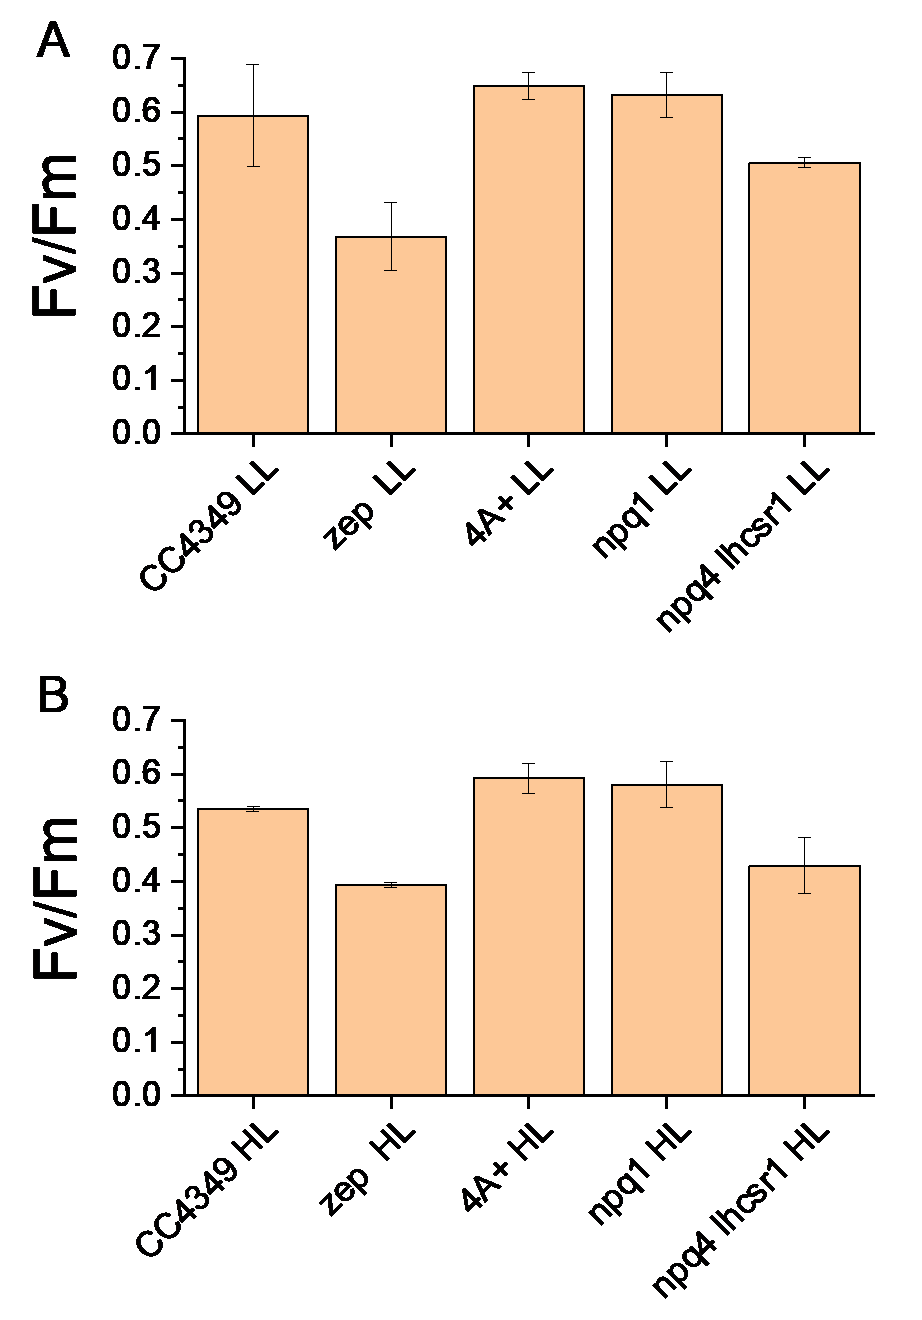

Supplement: supp [file elife-60383-supp-v1.zip › elife_poa_e60383_Figure_1_figure_supplement_7.png]

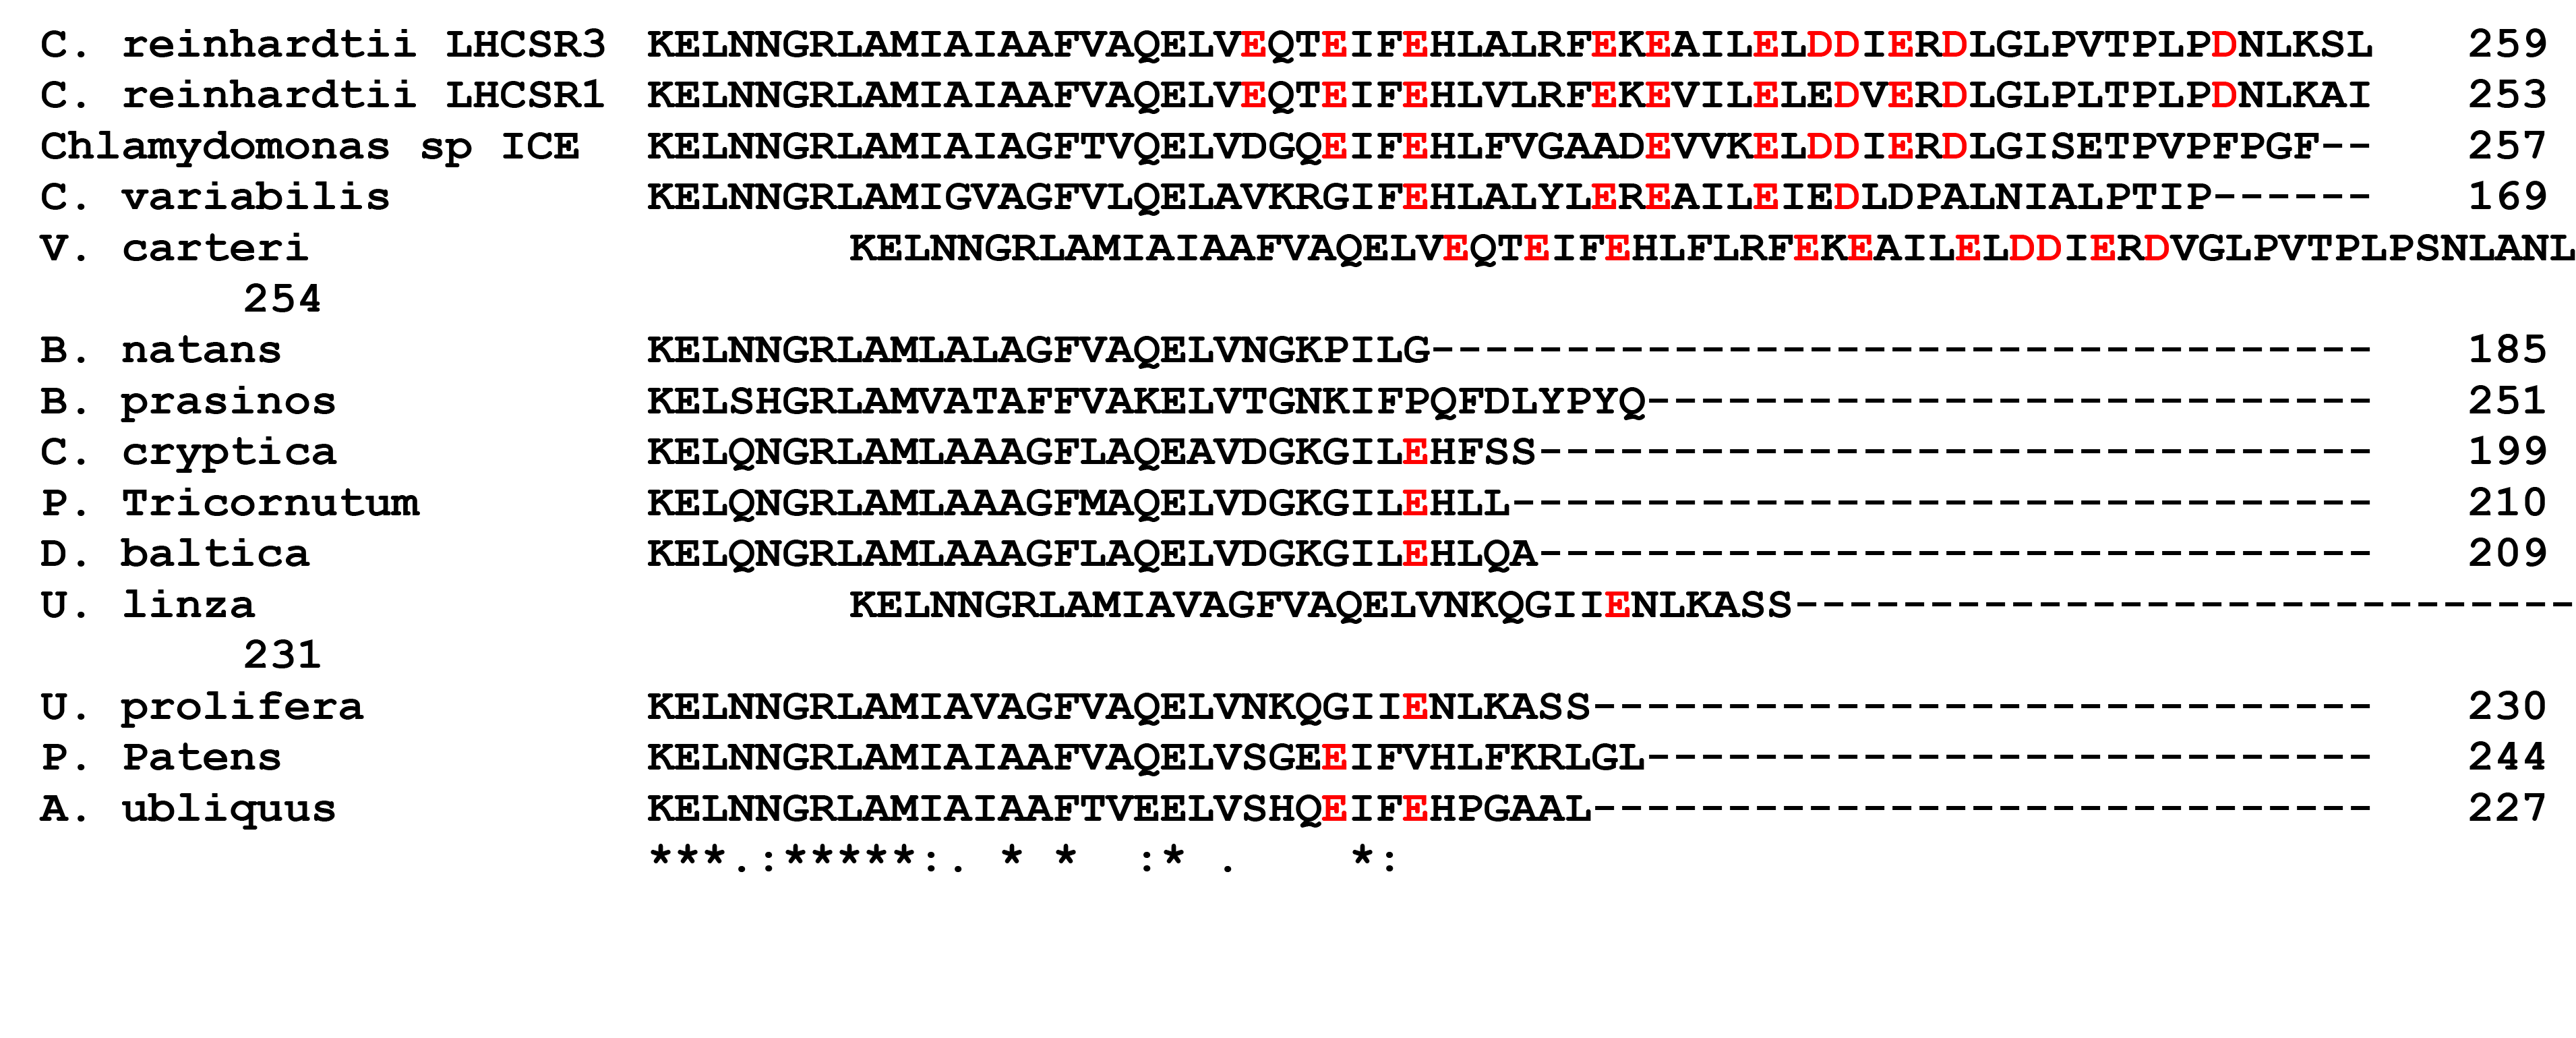

Supplement: supp [file elife-60383-supp-v1.zip › elife_poa_e60383_Figure_1_figure_supplement_8.png]

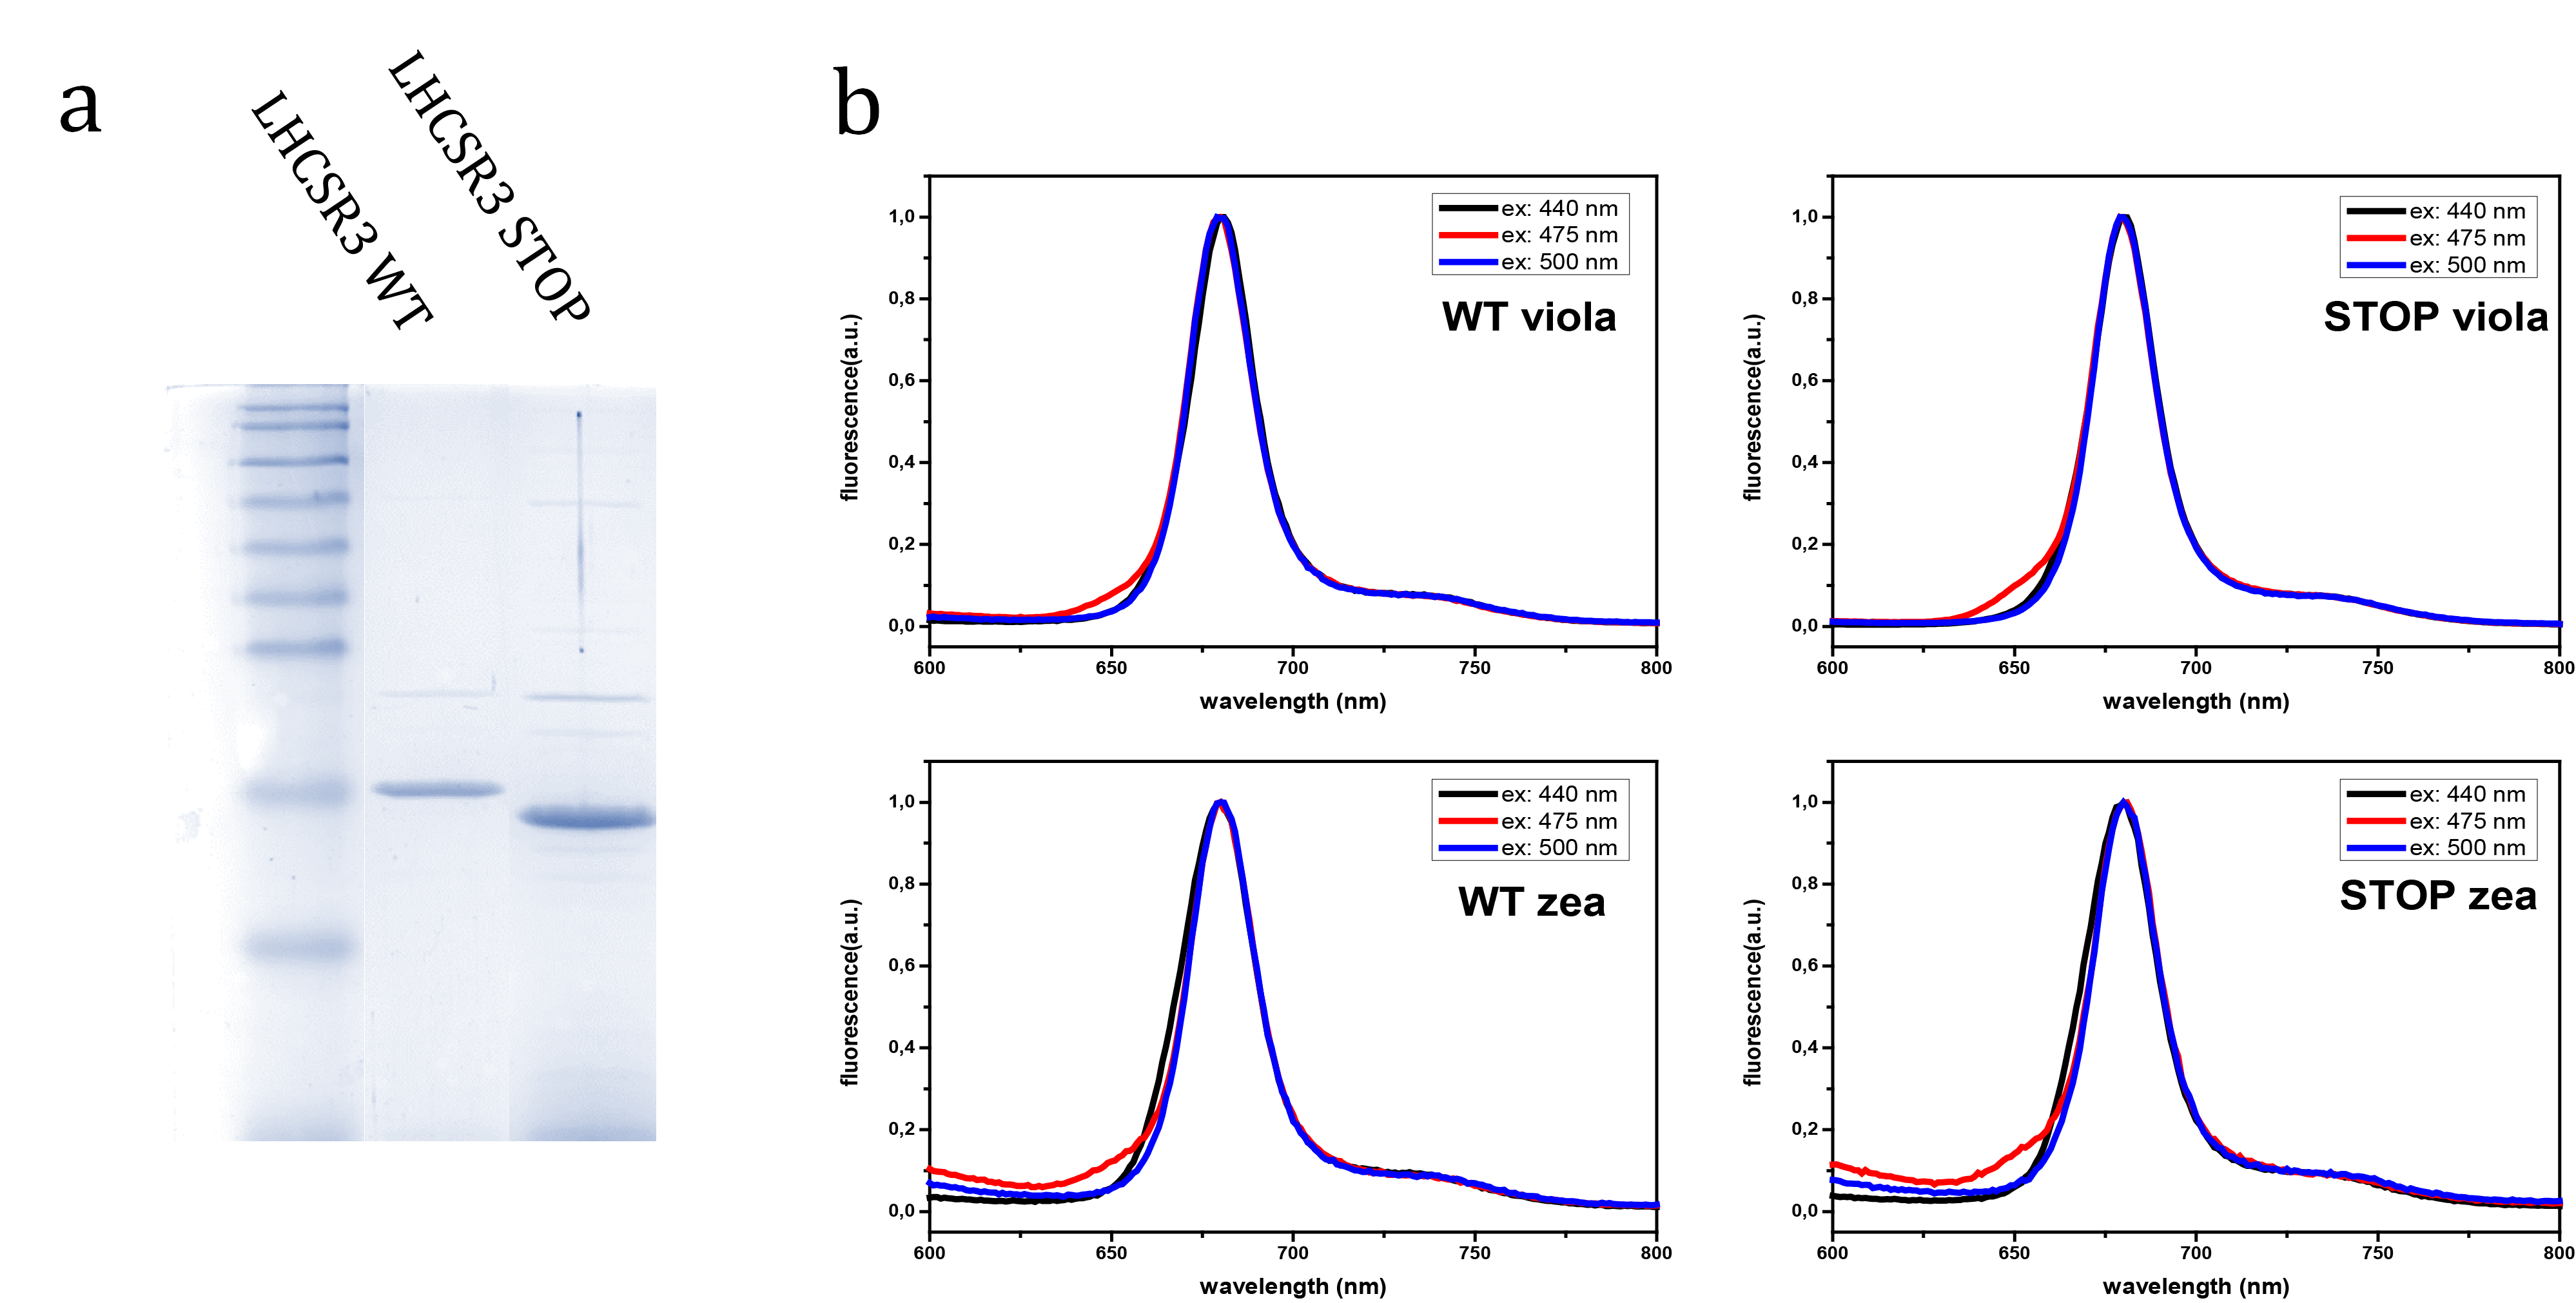

Supplement: supp [file elife-60383-supp-v1.zip › elife_poa_e60383_Figure_1_figure_supplement_9.png]

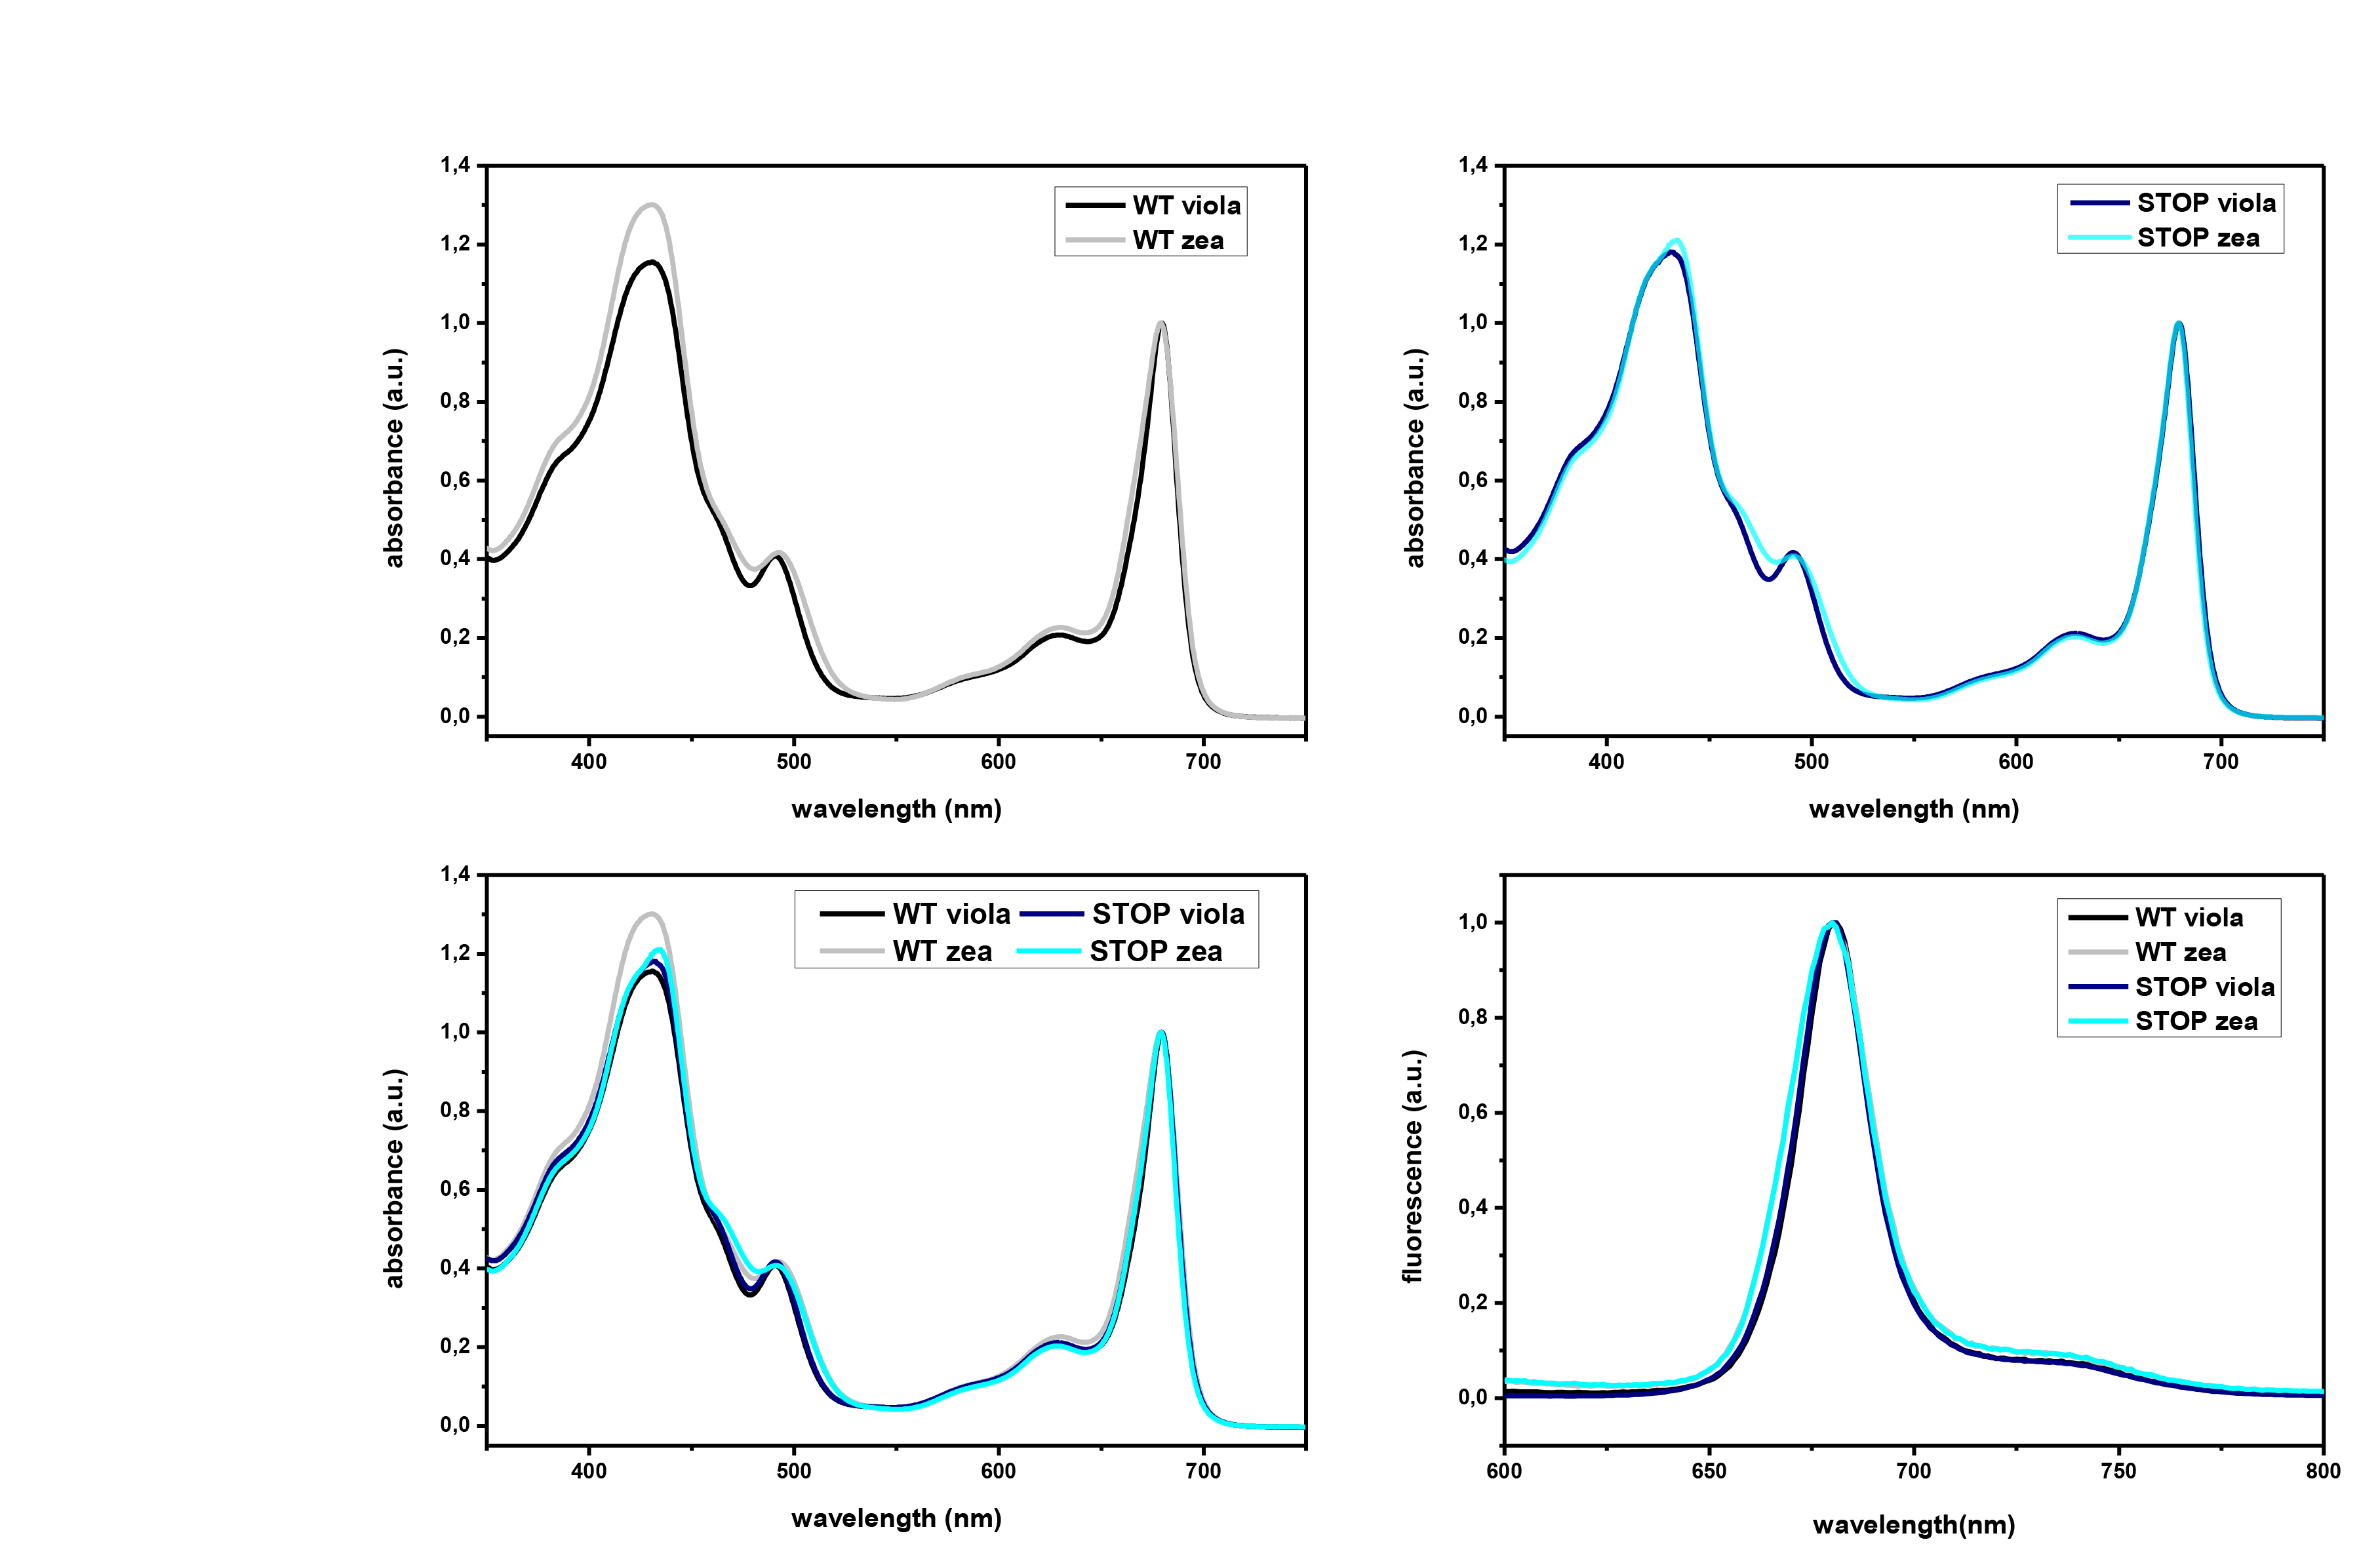

Supplement: supp [file elife-60383-supp-v1.zip › elife_poa_e60383_Figure_1_figure_supplement_10.png]

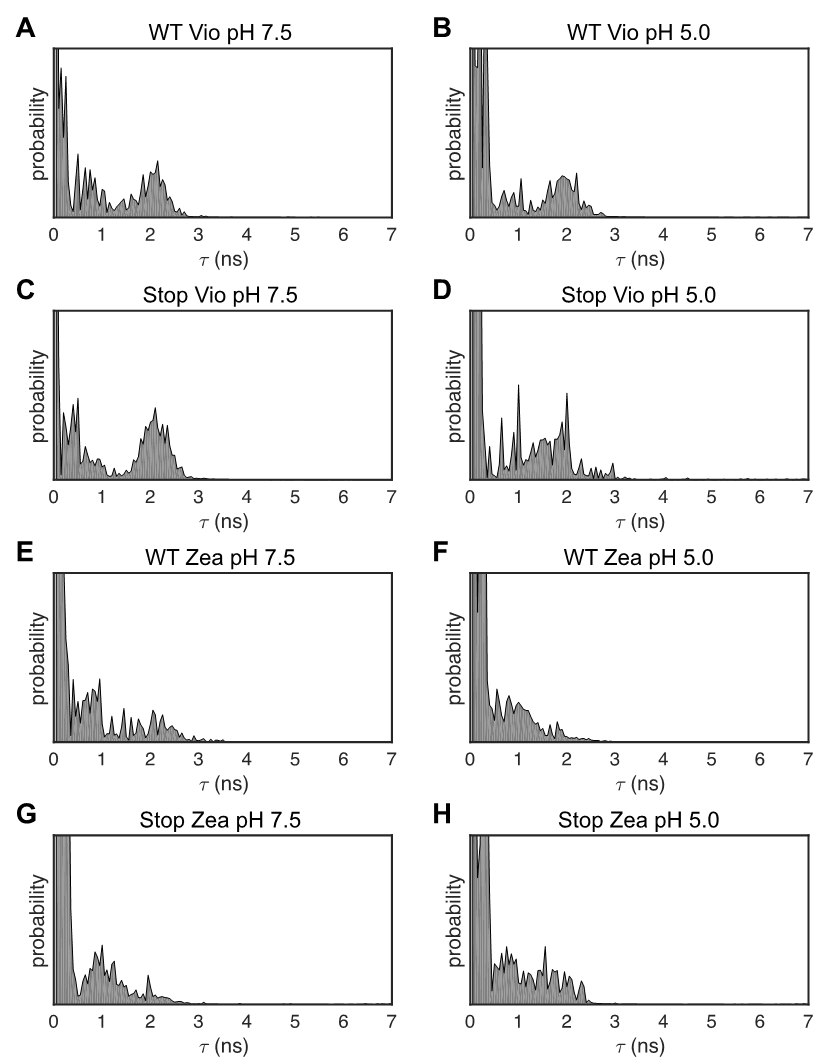

Supplement: supp [file elife-60383-supp-v1.zip › elife_poa_e60383_Figure_2_figure_supplement_1.png]

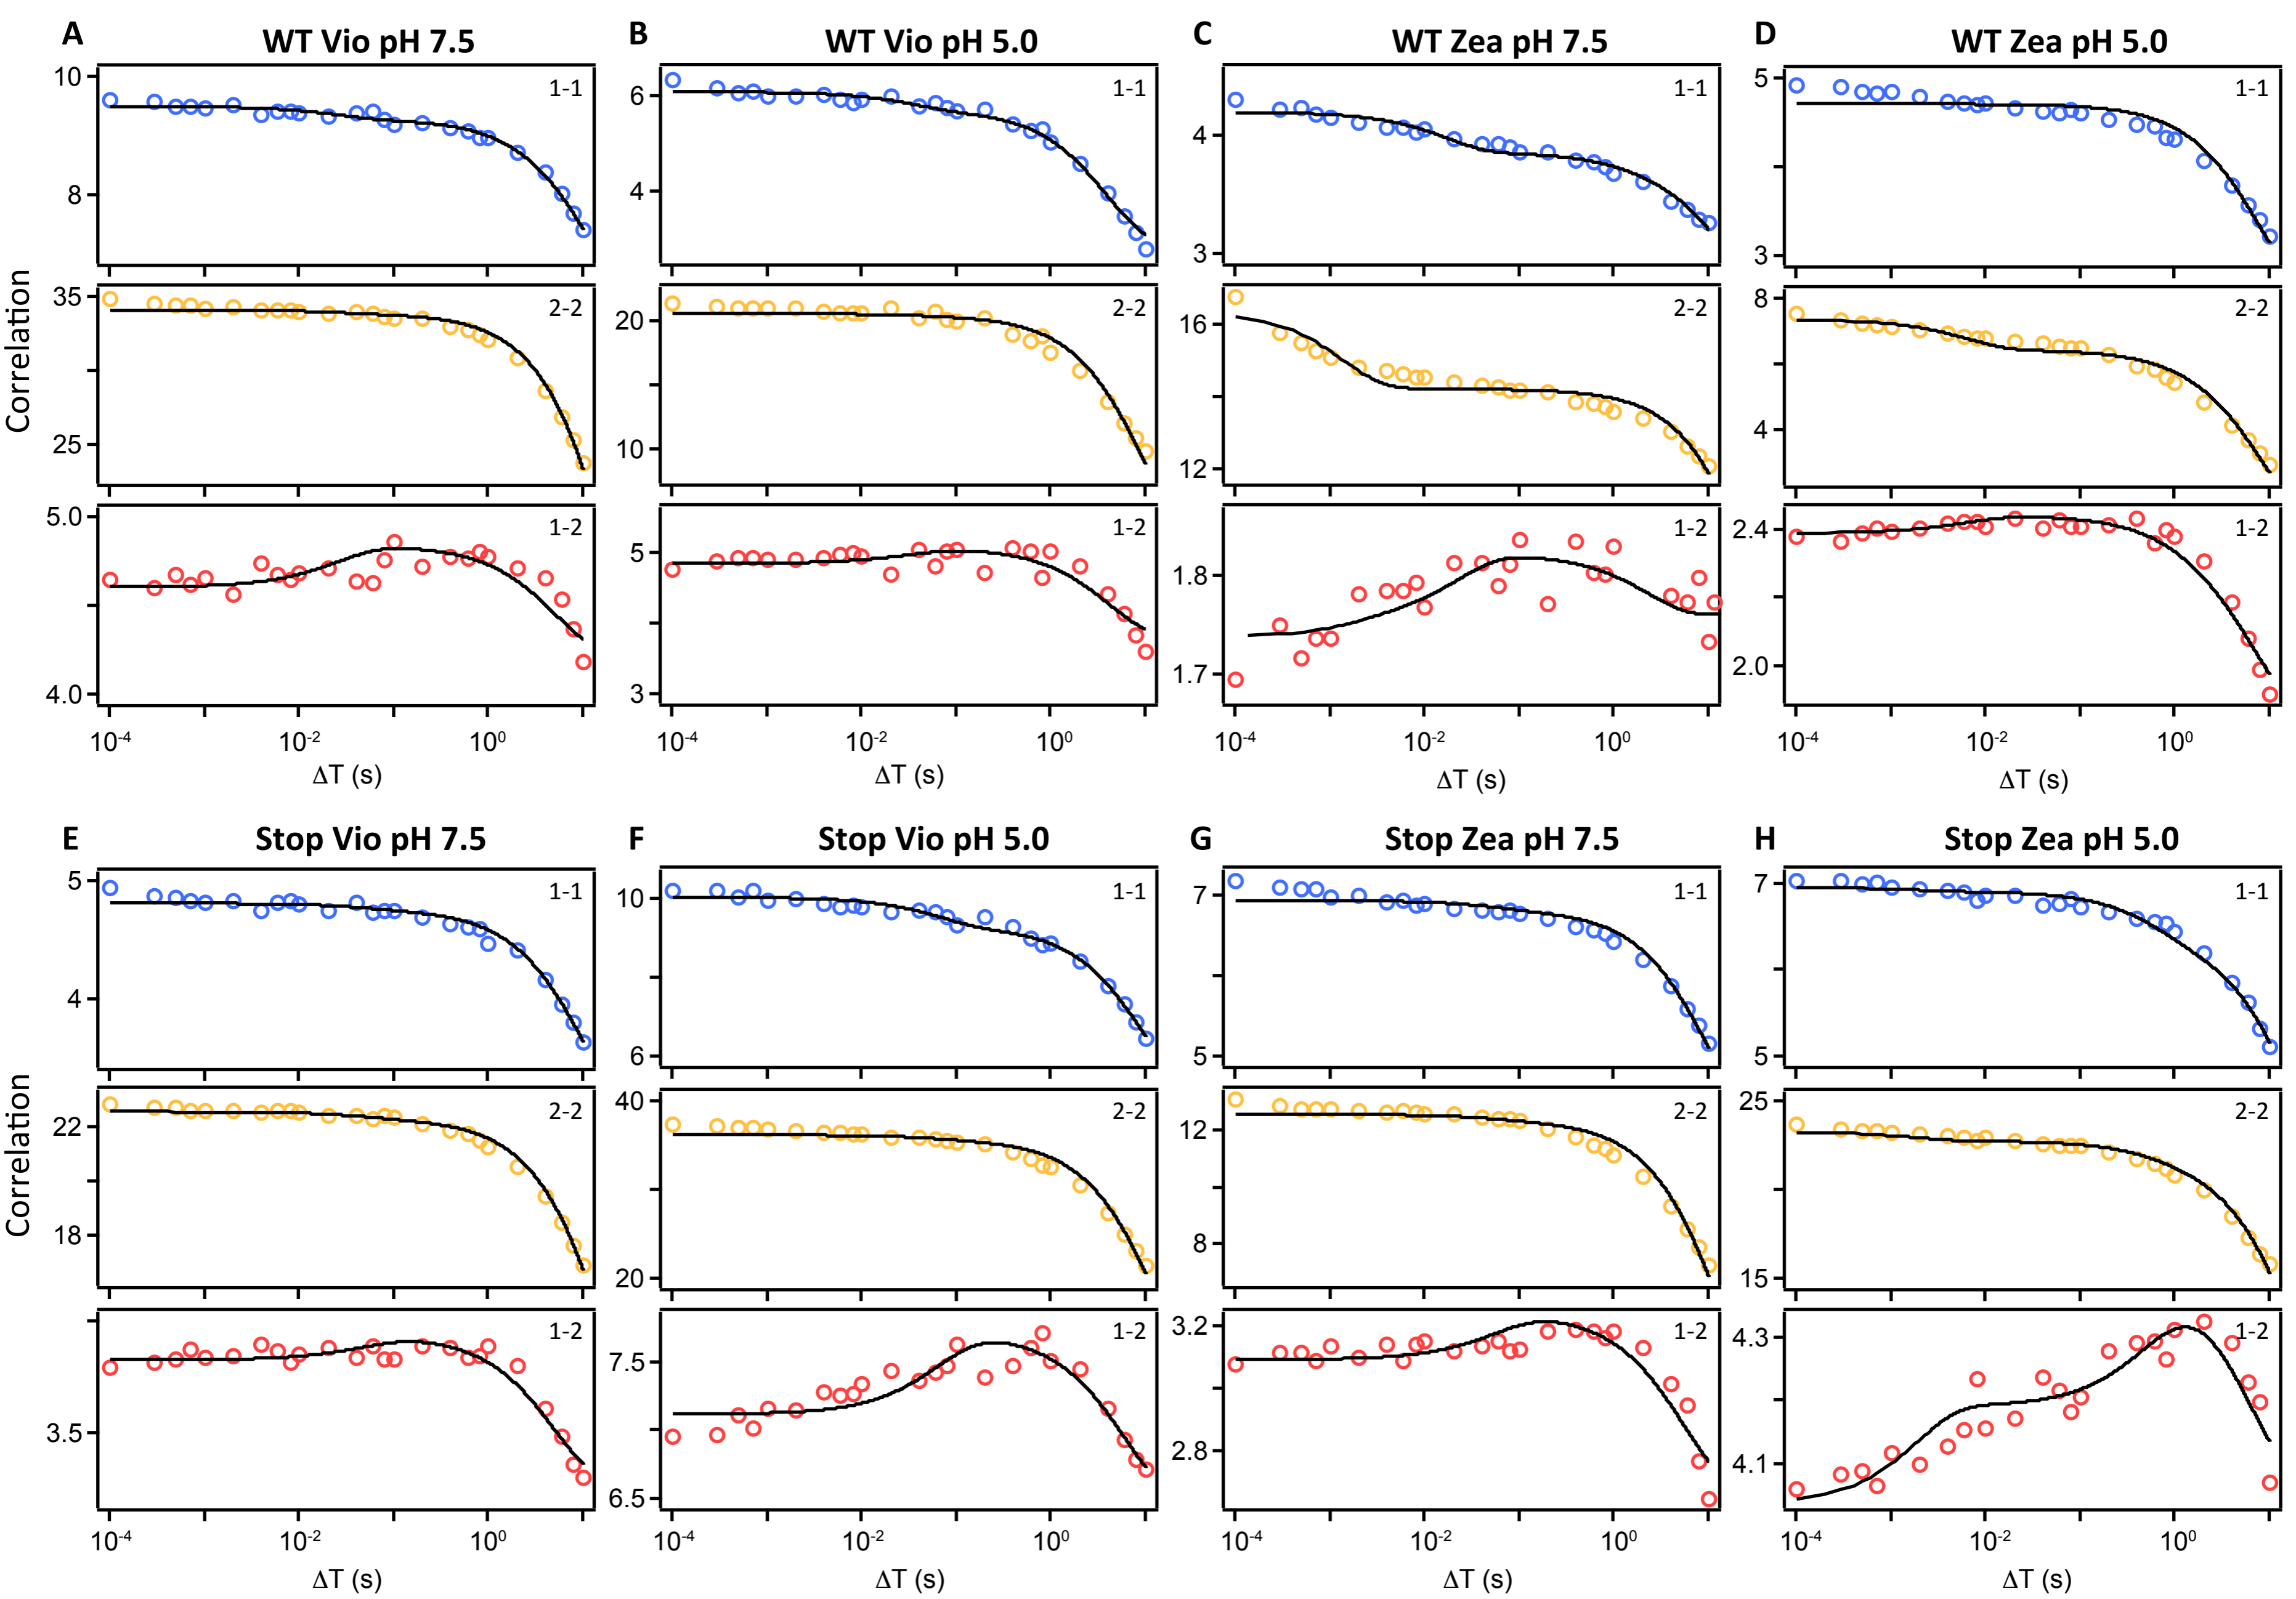

Supplement: supp [file elife-60383-supp-v1.zip › elife_poa_e60383_Figure_2_figure_supplement_2.pdf]

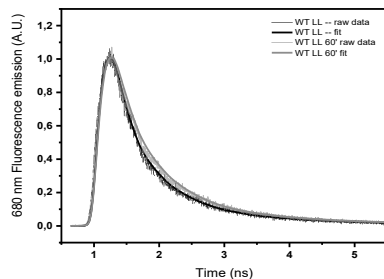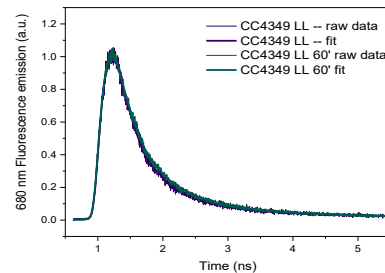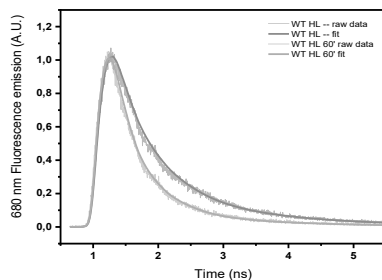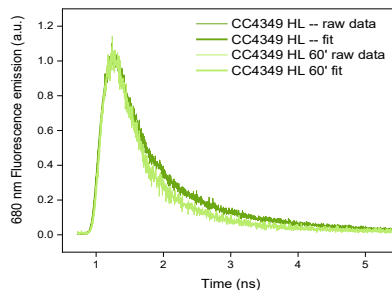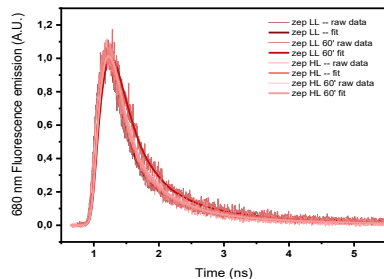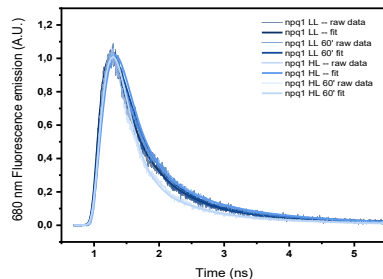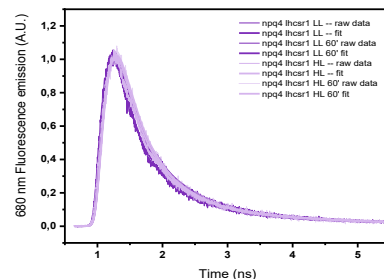

Supplement: supp [file elife-60383-supp-v1.zip › elife_poa_e60383_Figure_3_figure_supplement_1.pdf]

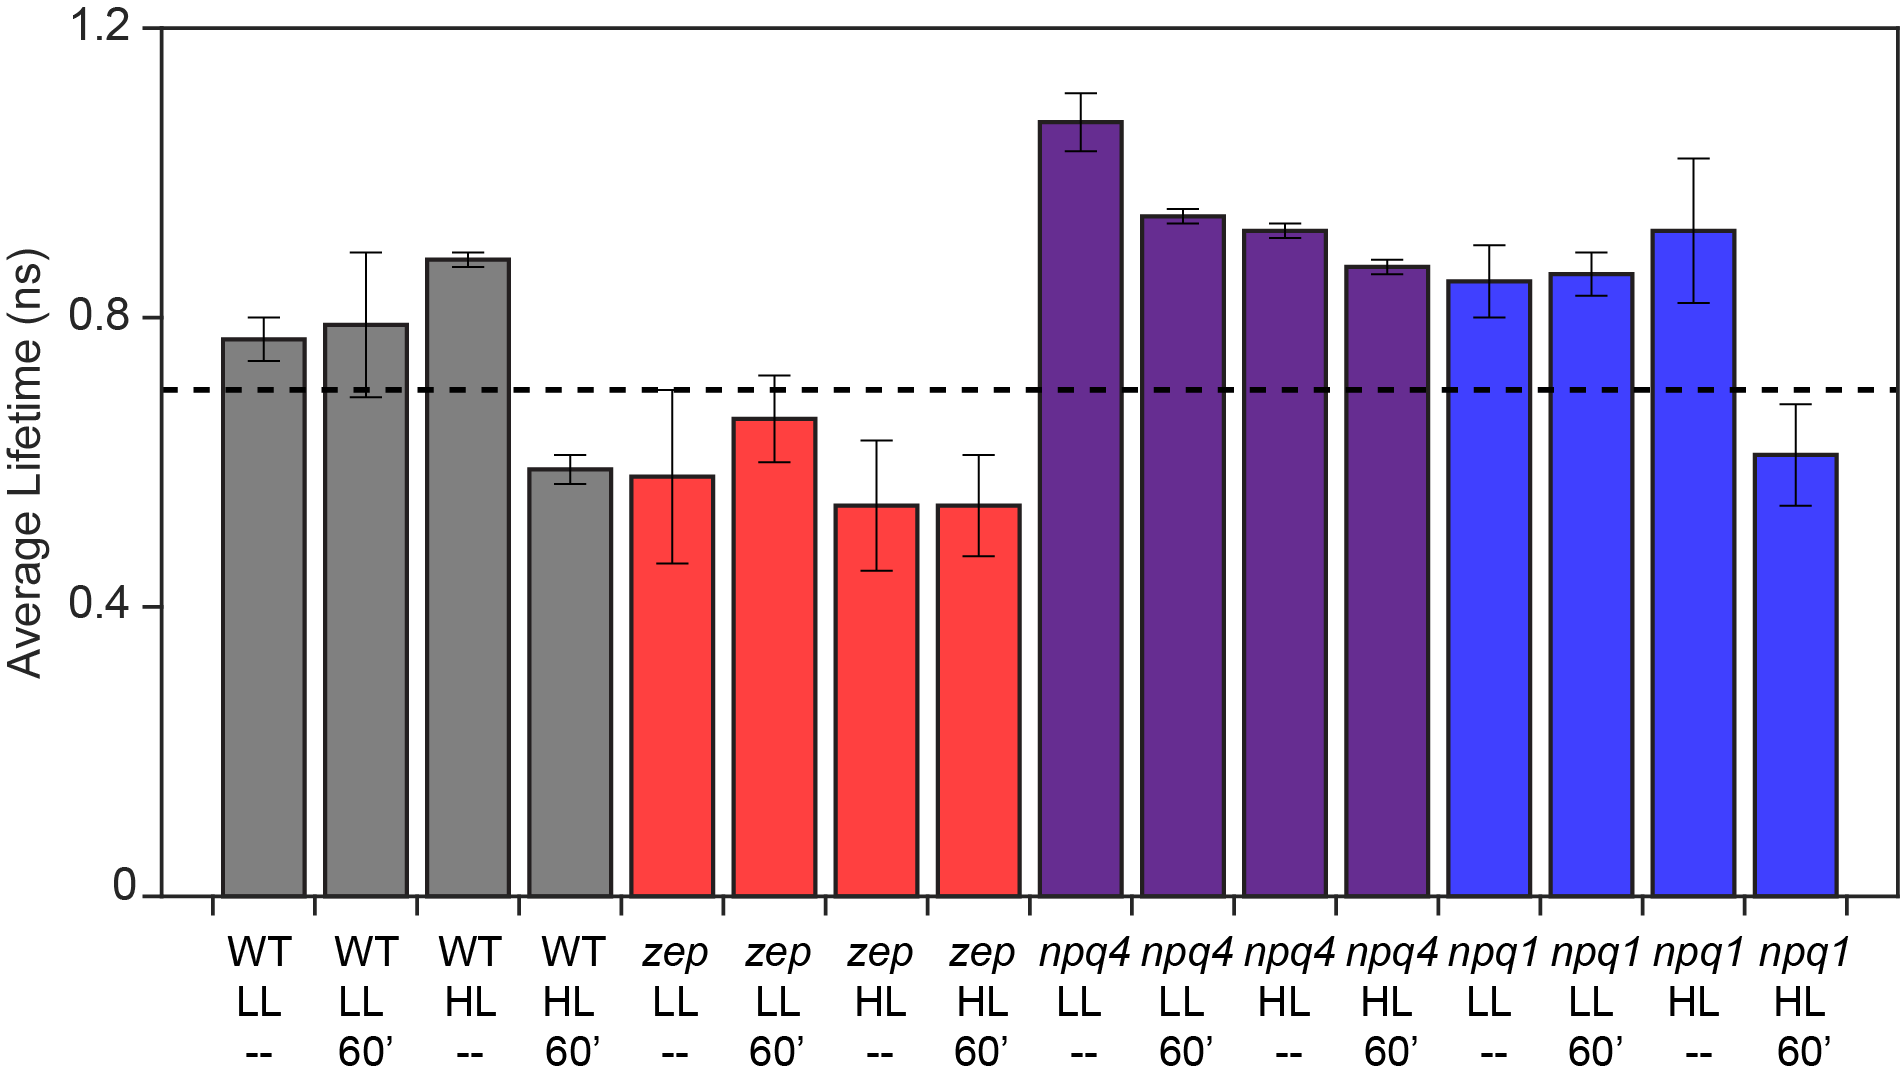

Supplement: supp [file elife-60383-supp-v1.zip › elife_poa_e60383_Figure_3_figure_supplement_2.png]

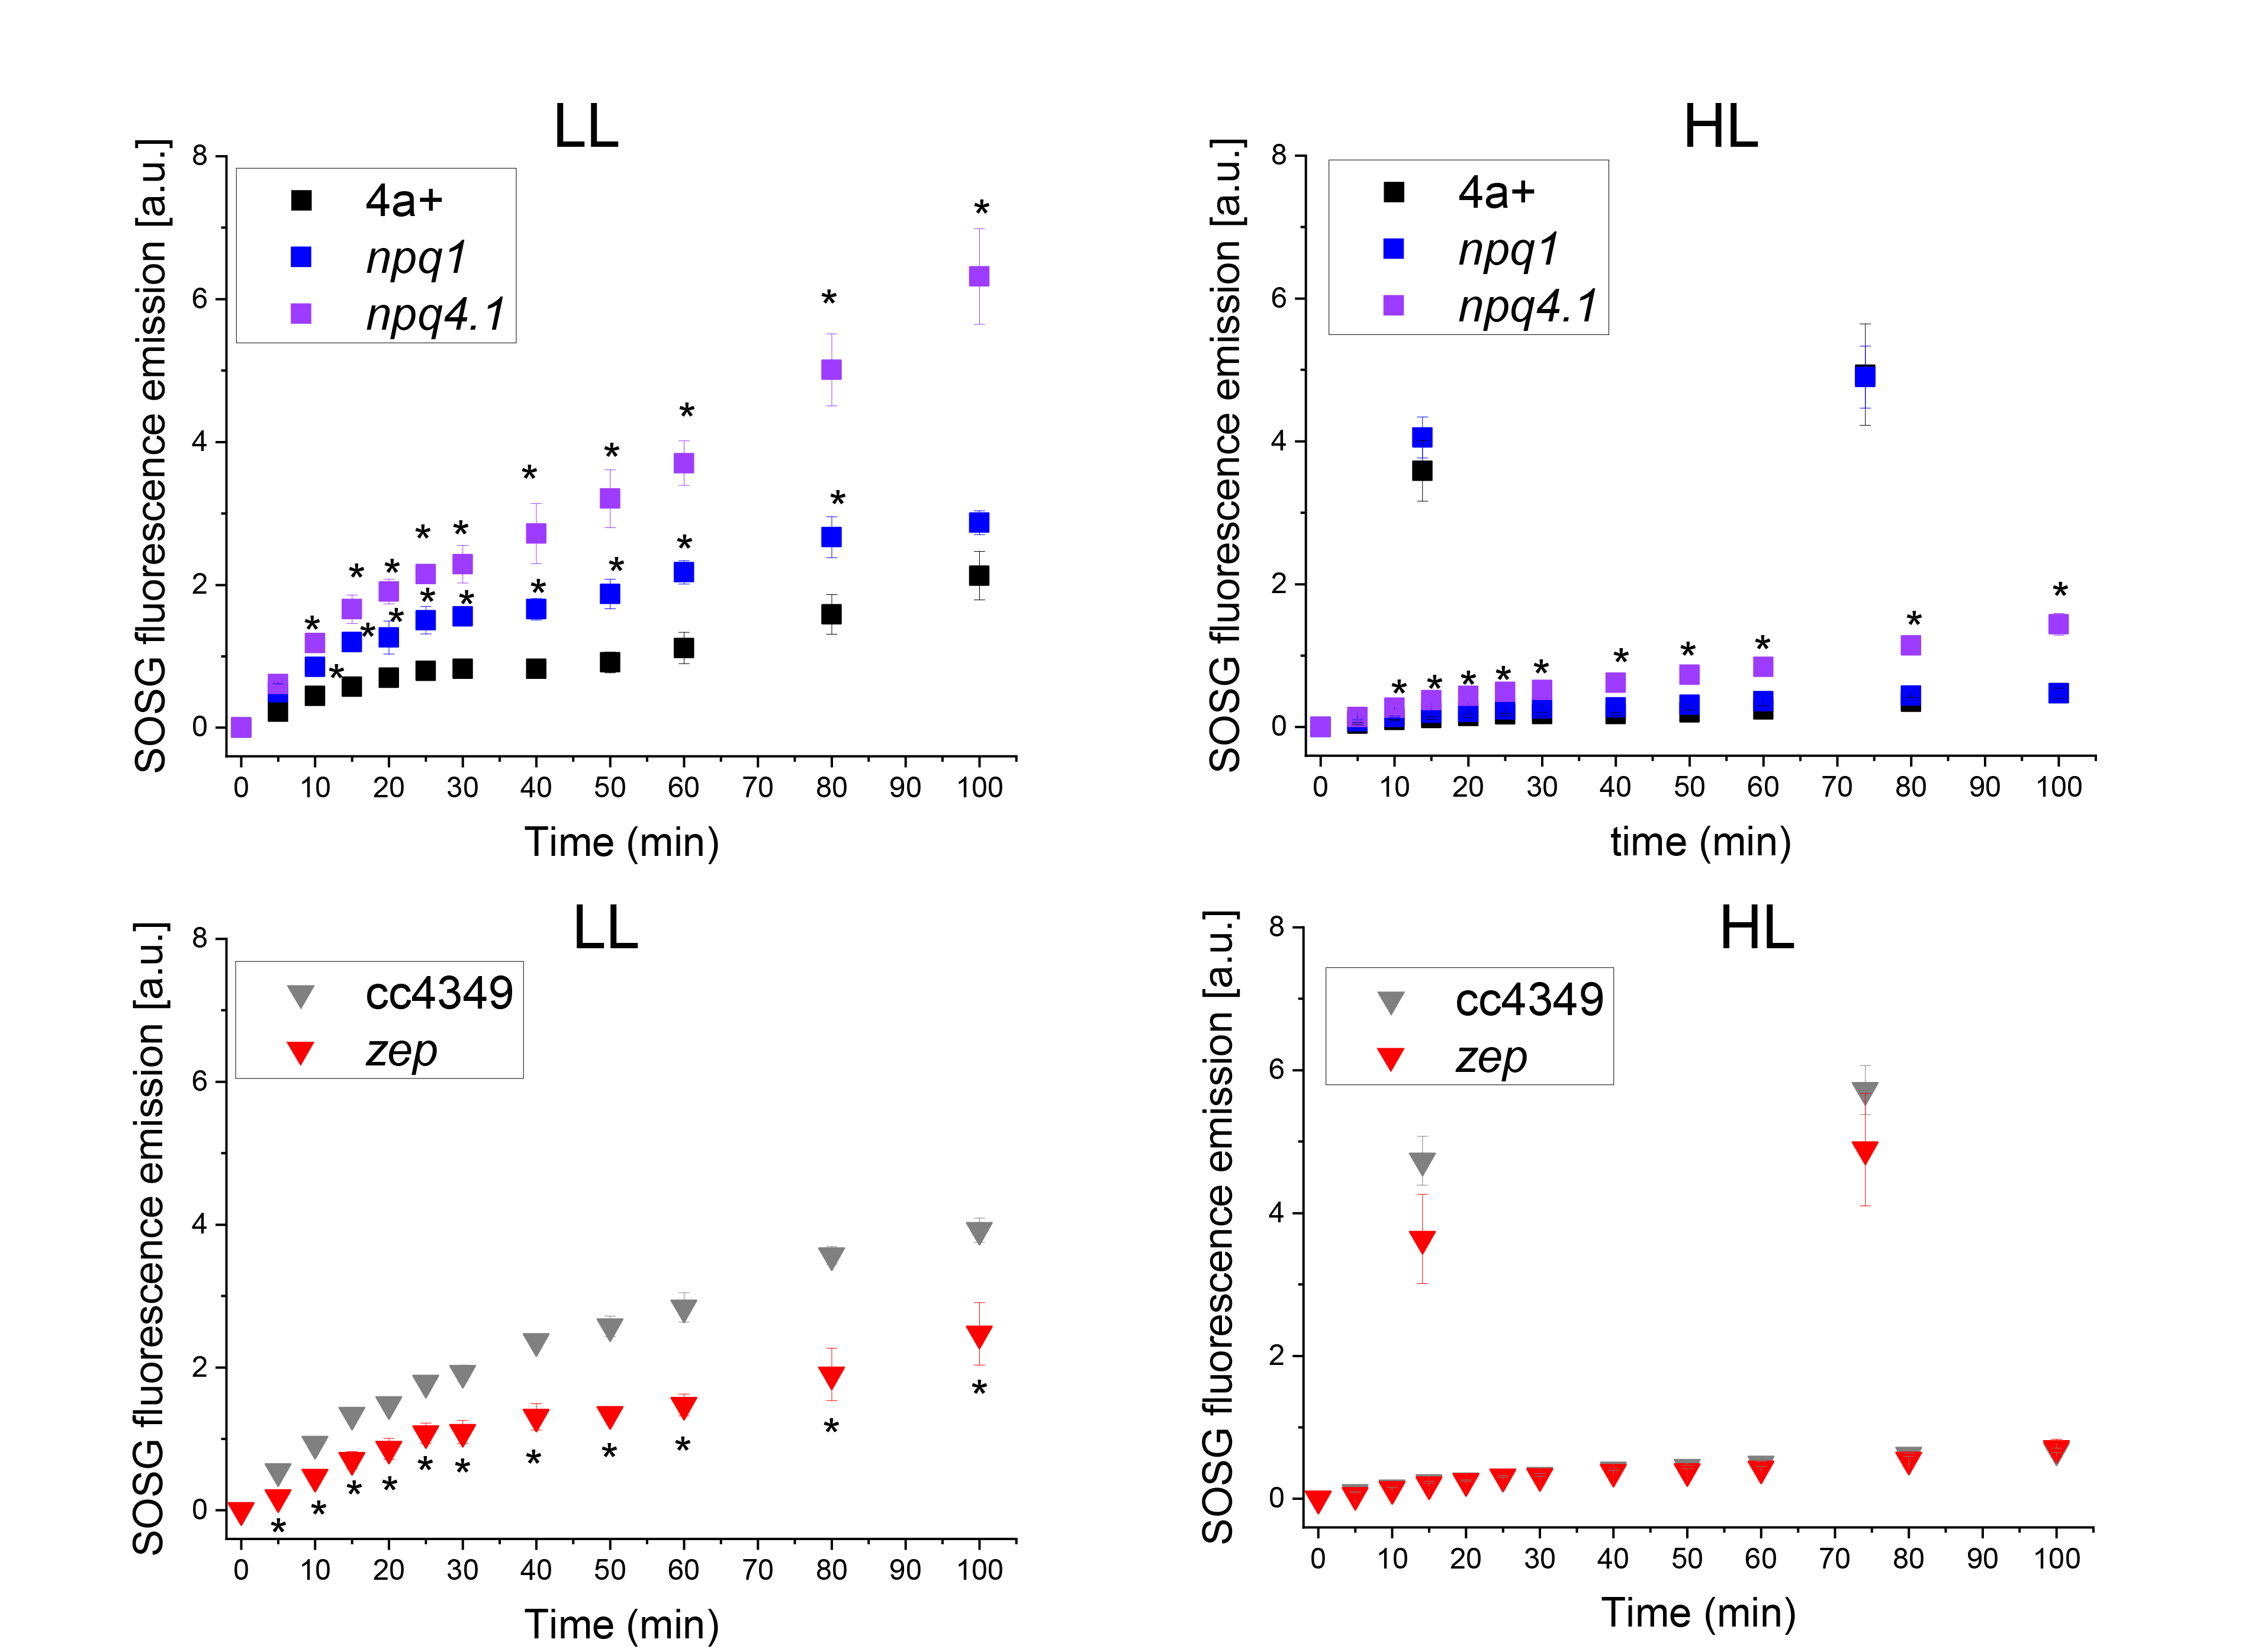

Supplement: supp [file elife-60383-supp-v1.zip › elife_poa_e60383_Figure_3_figure_supplement_3.png]

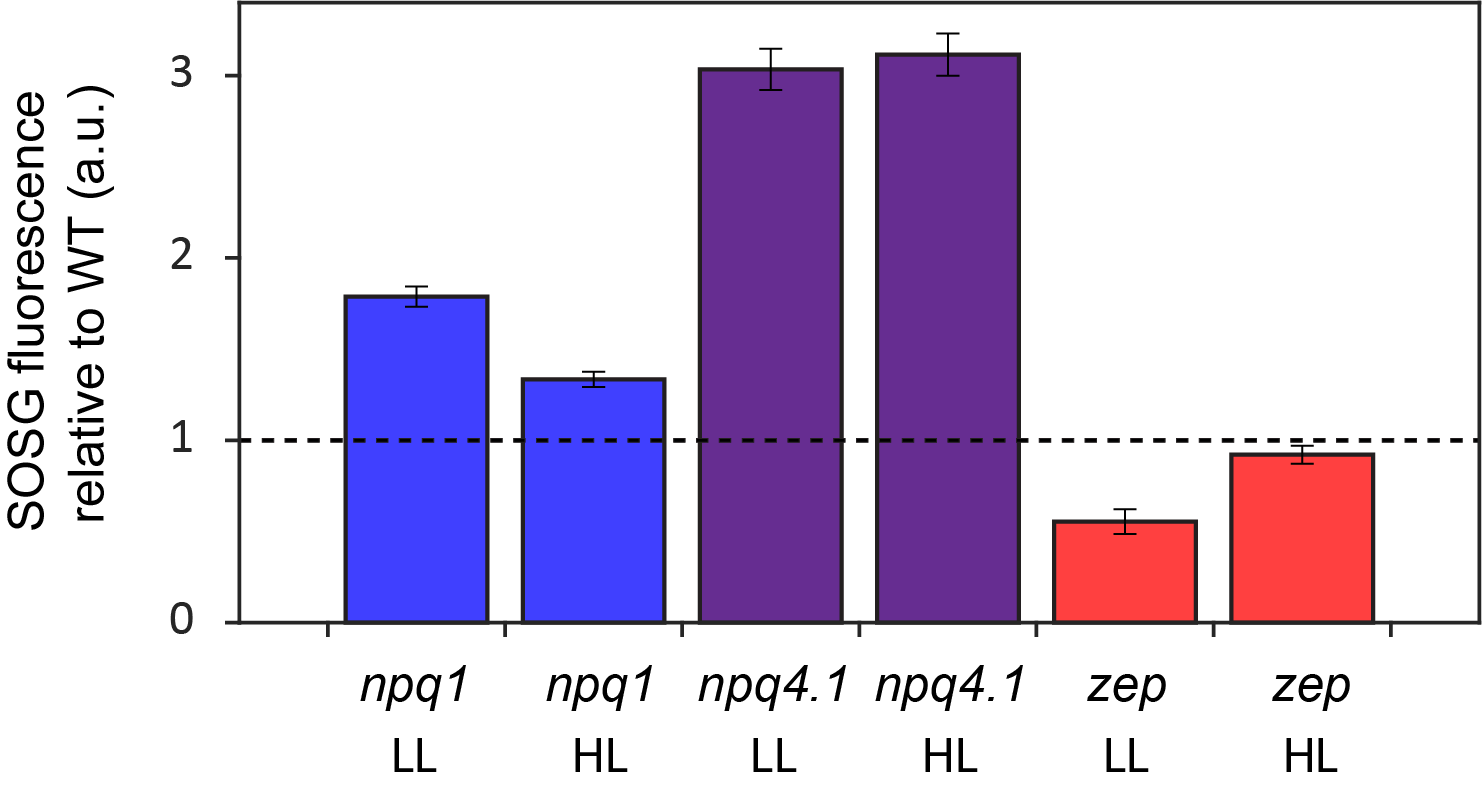

Supplement: supp [file elife-60383-supp-v1.zip › elife_poa_e60383_Figure_3_figure_supplement_4.png]

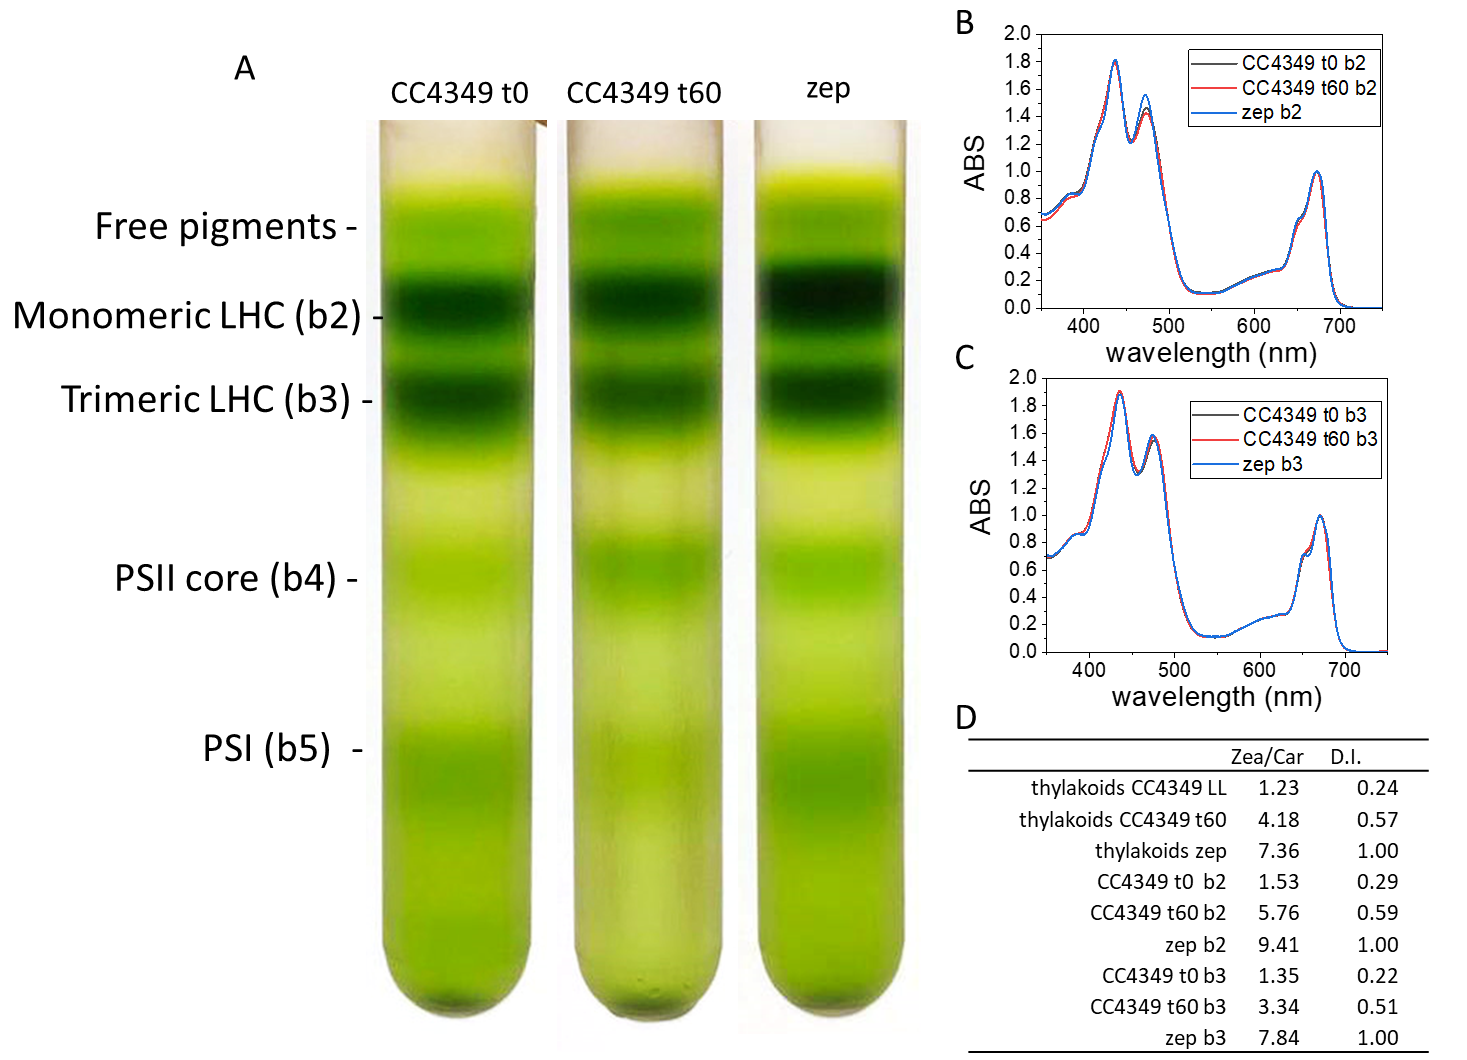

Supplement: supp [file elife-60383-supp-v1.zip › elife_poa_e60383_Figure_3_figure_supplement_5.png]

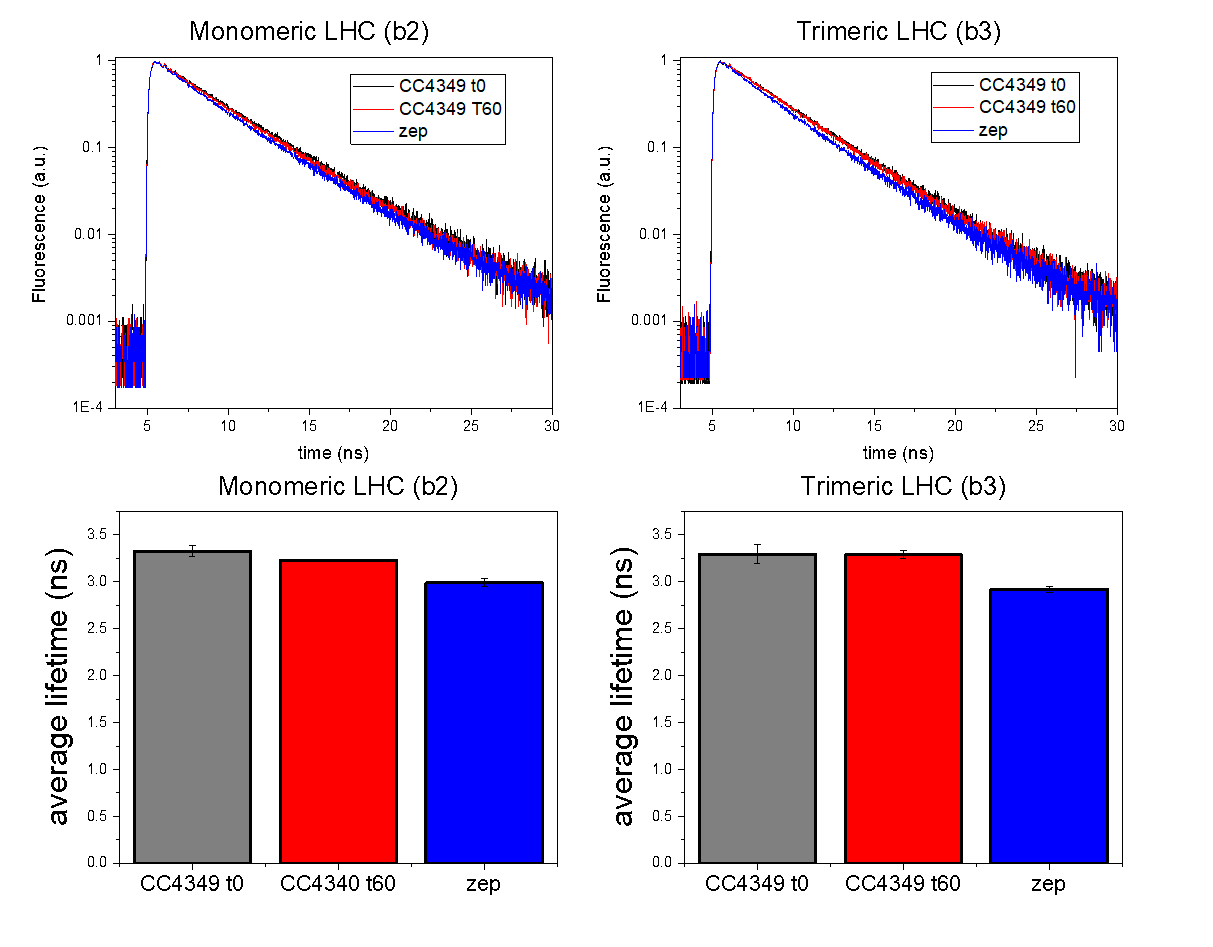

Supplement: supp [file elife-60383-supp-v1.zip › elife_poa_e60383_Figure_3_figure_supplement_6.png]
